# Supplementary material for: Comparative Transcriptome Analysis of Temperature-Induced Green Discoloration in Garlic
Source: Int J Genomics. 2018 Dec 2;2018:6725728. doi: 10.1155/2018/6725728 (PMC6304921; doi:10.1155/2018/6725728)
Supplement: Supplementary Materials — Supplementary data to this article can be found online and in Data Availability. 332 Supplementary Table S1: qRT-PCR primers of selected unigenes. 333 Supplementary Table S2: summary of transcriptome sequencing. 334 Supplementary Table S3: the function of unigenes annotated. 335 Supplementary Table S4: DEGs identified in three treatments. 336 Supplementary Table S5: GO terms enriched by DEGs. [file 6725728.f1.zip]

Archive with 6 entries (6 files):
- Supplementary Material.docx
- Table S1-qRT-PCR Primers of selected unigenes.xlsx
- Table S2-Summary of transcriptome sequencing.xlsx
- Table S3-The function of unigenes annotated.xls
- Table S4-DEGs identified in three treatments.xlsx
- Table S5-GO terms enriched by DEGs.xls
