# Supplementary material for: Comparative Transcriptome Analysis of Temperature-Induced Green Discoloration in Garlic
Source: Int J Genomics. 2018 Dec 2;2018:6725728. doi: 10.1155/2018/6725728 (PMC6304921; doi:10.1155/2018/6725728)
Supplement: Supplementary Materials — Supplementary data to this article can be found online and in Data Availability. 332 Supplementary Table S1: qRT-PCR primers of selected unigenes. 333 Supplementary Table S2: summary of transcriptome sequencing. 334 Supplementary Table S3: the function of unigenes annotated. 335 Supplementary Table S4: DEGs identified in three treatments. 336 Supplementary Table S5: GO terms enriched by DEGs. [file 6725728.f1.zip › Table S1-qRT-PCR Primers of selected unigenes.xlsx]

## Sheet: primer
index	gene id	forward primer	reverse primer
1	c144142_g1	GCAGTCCCGAAAACAAACCC	CCTTCTTTACCCACCCGCAT
2	c220198_g1	AGCCGAAGCGTTTACTTCCA	AACCAGTTGCAACCCAGTCA
3	c223769_g2	TGCCGATCTGGATTTTGCCT	CTCGAGCGCGAATGGTGATA
4	c205205_g1	TGAGGCGGATCTTCATGTCG	AACACTTAGCCGACTGCTCC
5	c215382_g1	TGGCGGAGCAAAGTTACAGT	TCTATTGGGTTGCCCGTTCC
6	c199231_g1	TGGGTTCATTGTTGGAGCGA	ATTCCACAAACCGCCAAACG
7	c183532_g1	TCAGATTGCCGTCTTGGACC	GGTCACCACCACTCACTCAG
8	c217242_g1	ATTGTGGGTCGCTGTCTCAG	TGTACGCACCATCAAGCACT
9	c201088_g1	TCTTCGCGAAAAGAACCCGA	GGTGCAGTCCAATGTTGCAG
10	c155953_g1	GCGTTGTCGAGATTGGAAGC	CCATATCGTTGCCTCTGCCT
11	c2033_g2	CGATCCTATGGAGCGAGAGC	TGAGCCGTATGTTGTTTGCC
12	c231786_g1	TTTAAGGGCAACCCTGGACC	TGATCCATCCTTTGGGGTGC
13	c223391_g3	CCCTCGGCATCATAGACCAC	AGGAAGACTGCAACCTCGTG
14	c225186_g1	GCCCGACAAGGAGAACAAGA	GCTTGGGACTGCCAGACATA
15	c89997_g1	GCTCTCAGCATCGCAACAAG	GAAGCTTTTGGCGTGGAAGG
16	c209040_g2	GACTTCCCGTTCAGCAAGGA	TCAGGCGTTTCCTTCCAGTC
17	c126221_g1	CTTGCTCCATTCGTGACCCT	GGGTGTCCAAATCATCCGGT
18	c183170_g1	AAGTTCGTGGACTGCTCAGG	TCCACGCACTCTCCAATGAC
19	c197215_g1	AAGGAACTCTGGAAGGCAGC	CTGGGCAGAAAGACGAGGTT
20	c224948_g1	TGCCTCTGTACCTGGATGGA	ATGAGGTGGCAGCTGATGTG
21	actin	CATGTTCACCACAACCGCAG	TGACCATCAGGGAGCTCGTA

## Sheet: unigenes
		log2 Fold change			q-value			Up/Down
Uingens	NR Description	DS1 vs DS0	DS2 vs DS0	DS3 vs DS0	DS1 vs DS0	DS2 vs DS0	DS3 vs DS0	DS1 vs DS0	DS2 vs DS0	DS3 vs DS0
c223391_g3	lectin	-7.04643	-6.10203	-4.78487	0.00358151	0.0131468	0.0260925	down	down	down
c144142_g1	beta-glucosidase 1-like	6.54382	8.05934	7.33398	0.00183407	0.00301884	0.00730546	up	up	up
c220198_g1	protein NRT1/ PTR FAMILY 3.1	5.18154	5.28205	4.64893	0.00319519	0.00336618	0.0135525	up	up	up
c223769_g2	beta-glucosidase 31-like	5.16287	5.65864	5.35647	0.00334192	0.00395273	0.0153434	up	up	up
c205205_g1	probable pectate lyase 5	4.6674	5.03904	4.15416	0.00244865	0.00456725	0.0153434	up	up	up
c215382_g1	probable pectate lyase 8	6.68637	6.68318	4.55388	0.00727737	0.00368229	0.0140446	up	up	up
c199231_g1	probable aquaporin TIP2-2	6.08817	5.80949	4.3799	0.00421233	0.00543688	0.0305232	up	up	up
c183532_g1	glucan endo-1,3-beta-glucosidase 11-like	3.88994	3.76763	3.78459	0.00828197	0.010772	0.0297187	up	up	up
c217242_g1	vacuolar-processing enzyme-like	4.4065	4.42303	3.39922	0.00989852	0.00418091	0.0263574	up	up	up
c201088_g1	glucan endo-1,3-beta-glucosidase 10-like	4.20981	3.75251	1.92946	0.00390674	0.0105973	0.0252622	up	up	up
c155953_g1	glucan endo-1,3-beta-glucosidase-like	-3.78059	-4.88169	-4.23378	0.00666396	0.00503206	0.041418	down	down	down
c225186_g1	heat shock protein 83	-4.69123	-5.41634	-5.16542	0.00261227	0.00336618	0.0188437	down	down	down
c89997_g1	chloroplast small heat shock protein	-4.78087	-5.4422	-5.59936	0.00334192	0.00363332	0.0192641	down	down	down
c209040_g2	chaperone	-5.02574	-6.46884	-6.82589	0.00274111	0.00456079	0.0264334	down	down	down
c126221_g1	D-3-phosphoglycerate dehydrogenase 1, chloroplastic	3.32191	3.41334	3.02242	0.0052406	0.0066076	0.0328888	up	up	up
c183170_g1	glutamate--cysteine ligase, chloroplastic-like	-4.02323	-5.45734	-5.90577	0.00399233	0.00376599	0.0160564	down	down	down
c197215_g1	9-cis-epoxycarotenoid dioxygenase, chloroplastic-like	-3.34035	-4.0284	-4.11036	0.00789493	0.00988416	0.0252622	down	down	down
c2033_g2	ricin B-like lectin R40C1	2.43312	2.49684	3.35878	0.00858096	0.00675745	0.0277191	up	up	up
c231786_g1	G-type lectin S-receptor-like serine/threonine-protein kinase LECRK2	-2.71331	-3.77233	-3.12527	0.00351314	0.00358977	0.0256554	down	down	down
c224948_g1	peptidyl-prolyl cis-trans isomerase FKBP16-1	-2.08368	-2.32022	-2.09401	0.00359689	0.00350478	0.0231662	down	down	down
