# Supplementary material for: Comparative Transcriptome Analysis of Temperature-Induced Green Discoloration in Garlic
Source: Int J Genomics. 2018 Dec 2;2018:6725728. doi: 10.1155/2018/6725728 (PMC6304921; doi:10.1155/2018/6725728)
Supplement: Supplementary Materials — Supplementary data to this article can be found online and in Data Availability. 332 Supplementary Table S1: qRT-PCR primers of selected unigenes. 333 Supplementary Table S2: summary of transcriptome sequencing. 334 Supplementary Table S3: the function of unigenes annotated. 335 Supplementary Table S4: DEGs identified in three treatments. 336 Supplementary Table S5: GO terms enriched by DEGs. [file 6725728.f1.zip › Table S2-Summary of transcriptome sequencing.xlsx]

## Sheet: TableS1. Trancriptome sequencin
Sample name	Raw reads	Clean reads	Clean bases	Valid(%)	Q20(%)	Q30(%)	GC content(%)
DS0_1	80602026	74387358	11.2G	92.29	99.02	97.15	43.65
DS0_2	75244580	70356854	10.6G	93.5	99.07	97.27	43.81
DS0_3	73075756	66694438	10.0G	91.27	98.93	96.96	42.12
DS1_1	79111032	73385770	11.0G	92.76	99.03	97.19	43.45
DS1_2	78901330	73699896	11.1G	93.41	99.07	97.29	43.65
DS1_3	82265404	77831580	11.7G	94.61	99.13	97.46	43.66
DS2_1	75321462	71105590	10.7G	94.4	99.13	97.44	43.87
DS2_2	73785302	69462364	10.4G	94.14	99.12	97.41	43.42
DS2_3	72712766	68664822	10.3G	94.43	99.14	97.47	43.39
DS3_1	79983212	74682452	11.2G	93.37	99.07	97.31	44.78
DS3_2	78387250	72662370	10.9G	92.7	99.02	97.18	43.11
DS3_3	73004720	68796964	10.3G	94.24	99.13	97.44	43.07
