# Supplementary material for: Comparative Transcriptome Analysis of Temperature-Induced Green Discoloration in Garlic
Source: Int J Genomics. 2018 Dec 2;2018:6725728. doi: 10.1155/2018/6725728 (PMC6304921; doi:10.1155/2018/6725728)
Supplement: Supplementary Materials — Supplementary data to this article can be found online and in Data Availability. 332 Supplementary Table S1: qRT-PCR primers of selected unigenes. 333 Supplementary Table S2: summary of transcriptome sequencing. 334 Supplementary Table S3: the function of unigenes annotated. 335 Supplementary Table S4: DEGs identified in three treatments. 336 Supplementary Table S5: GO terms enriched by DEGs. [file 6725728.f1.zip › Table S3-The function of unigenes annotated.xls]

gene	GO	KEGG.id|logEvalue|KO|KO.def|ko|ko.defLine	eggNOG.id|logEvalue|Orthologous|FunCat|description	Pfam.acc|hmm.name|Evalue|description	SwissProt.entry|name|logEvalue|description	NR.acc|logEvalue|des
c23339_g1	-	-	-	-	-	WP_060979064.1|-92.9|hypothetical protein [Porphyrobacter donghaensis]
c202034_g1	-	-	-	-	-	XP_020267788.1|-51.2|uncharacterized protein C20orf24 homolog [Asparagus officinalis]
c219999_g2	biological_process:ion transport(GO:0006811);;cellular_component:membrane(GO:0016020);;cellular_component:integral component of membrane(GO:0016021);;cellular_component:vacuole(GO:0005773);;cellular_component:vacuolar membrane(GO:0005774);;biological_process:transport(GO:0006810)	-	4641.GSMUA_Achr5P00150_001|-128.7|ENOG410XS02|P|Sodium/calcium exchanger protein	-	Q2R041|MHX1_ORYSJ|-205.1|Magnesium/proton exchanger 1 OS=Oryza sativa subsp. japonica GN=MHX1 PE=2 SV=1	XP_015577194.1|-211.7|PREDICTED: magnesium/proton exchanger isoform X2 [Ricinus communis]
c218687_g1	-	-	39947.LOC_Os05g29120.1|-58.4|COG2801|L|Retrotransposon protein	-	-	GAV85641.1|-62.2|hypothetical protein CFOL_v3_29075, partial [Cephalotus follicularis]
c217906_g1	cellular_component:mitochondrion(GO:0005739);;cellular_component:mitochondrion(GO:0005739)	-	4113.PGSC0003DMT400062748|-119.8|ENOG410Z7Z7|S|Pentatricopeptide repeat-containing protein	-	Q9LXE8|PP386_ARATH|-103.7|Pentatricopeptide repeat-containing protein At5g15340, mitochondrial OS=Arabidopsis thaliana GN=PCMP-H91 PE=2 SV=1	OVA08950.1|-141.1|Pentatricopeptide repeat [Macleaya cordata]
c184591_g1	cellular_component:cytoskeleton(GO:0005856);;biological_process:actin filament capping(GO:0051693);;molecular_function:actin binding(GO:0003779);;cellular_component:cytoplasm(GO:0005737);;cellular_component:cytoskeleton(GO:0005856)	pda:103700636|-123.2|K10365|CAPZB; capping protein (actin filament) muscle Z-line, beta|ko04144|Endocytosis;;	4641.GSMUA_Achr11P13020_001|-118.0|ENOG410XQYD|O|capping protein	PF01115.15|F_actin_cap_B|1.1e-93|F-actin capping protein, beta subunit	Q9M9G7|CAPZB_ARATH|-115.3|Probable F-actin-capping protein subunit beta OS=Arabidopsis thaliana GN=At1g71790 PE=1 SV=1	XP_020274833.1|-124.9|probable F-actin-capping protein subunit beta [Asparagus officinalis]
c219180_g2	molecular_function:nuclease activity(GO:0004518);;molecular_function:endonuclease activity(GO:0004519);;biological_process:proteolysis(GO:0006508);;molecular_function:peptidase activity(GO:0008233);;molecular_function:transferase activity(GO:0016740);;molecular_function:nucleotidyltransferase activity(GO:0016779);;molecular_function:hydrolase activity(GO:0016787);;molecular_function:metal ion bin…	-	4081.Solyc11g062200.1.1|-86.0|ENOG410XS4D|S|Retrotransposon protein	-	P10978|POLX_TOBAC|-86.2|Retrovirus-related Pol polyprotein from transposon TNT 1-94 OS=Nicotiana tabacum PE=2 SV=1	AAV88069.1|-90.4|hypothetical retrotransposon [Ipomoea batatas]
c222781_g1	-	-	-	-	-	XP_020702031.1|-50.7|uncharacterized protein LOC110113696 [Dendrobium catenatum]
c229767_g2	cellular_component:chromosome(GO:0005694);;biological_process:DNA replication(GO:0006260);;biological_process:DNA repair(GO:0006281);;biological_process:transcription, DNA-templated(GO:0006351);;biological_process:regulation of transcription, DNA-templated(GO:0006355);;biological_process:cellular response to DNA damage stimulus(GO:0006974);;cellular_component:nucleus(GO:0005634);;cellular_compone…	-	29760.VIT_14s0060g00580.t01|-10000.0|COG5406|K|Component of the FACT complex, a general chromatin factor that acts to reorganize nucleosomes. The FACT complex is involved in multiple processes that require DNA as a template such as mRNA elongation, DNA replication and DNA repair. During transcription elongation the FACT complex acts as a histone chaperone that both destabilizes and restores nucle…	-	Q7X923|SPT16_ORYSJ|-10000.0|FACT complex subunit SPT16 OS=Oryza sativa subsp. japonica GN=SPT16 PE=2 SV=2	XP_020254994.1|-10000.0|FACT complex subunit SPT16-like [Asparagus officinalis]
c205658_g1	-	-	-	-	-	XP_020102323.1|-141.7|uncharacterized protein LOC109719897 [Ananas comosus]
c211309_g3	biological_process:galactose metabolic process(GO:0006012);;molecular_function:transferase activity(GO:0016740);;molecular_function:transferase activity, transferring glycosyl groups(GO:0016757);;molecular_function:metal ion binding(GO:0046872);;molecular_function:inositol 3-alpha-galactosyltransferase activity(GO:0047216);;cellular_component:cytoplasm(GO:0005737);;cellular_component:cytoplasm(GO…	nnu:104607072|-95.4|K18819|GOLS; inositol 3-alpha-galactosyltransferase [EC:2.4.1.123]|ko00052|Galactose metabolism;;	4641.GSMUA_Achr11P16140_001|-96.4|COG5597|O|Glycosyl Transferase	-	C7G304|GOLS2_SOLLC|-97.4|Galactinol synthase 2 OS=Solanum lycopersicum GN=GOLS2 PE=2 SV=1	XP_010270867.1|-94.7|PREDICTED: galactinol synthase 2-like [Nelumbo nucifera]
c222781_g4	-	-	3847.GLYMA02G14331.1|-64.9|ENOG4111XVU|S|NA	-	-	XP_020225016.1|-68.2|uncharacterized protein LOC109806893 [Cajanus cajan]
c228455_g1	cellular_component:membrane(GO:0016020);;cellular_component:integral component of membrane(GO:0016021);;molecular_function:hydrolase activity(GO:0016787);;molecular_function:8-oxo-dGTP phosphohydrolase activity(GO:0102490);;molecular_function:nucleotide binding(GO:0000166);;molecular_function:ATP binding(GO:0005524);;cellular_component:membrane(GO:0016020)	pda:103716401|-145.5|K01510|ENTPD1_3_8, CD39; apyrase [EC:3.6.1.5]|ko00230|Purine metabolism;;ko00240|Pyrimidine metabolism;;	3711.Bra019670.1-P|-119.8|COG5371|GO|Ectonucleoside triphosphate diphosphohydrolase	PF01150.15|GDA1_CD39|3.9e-82|GDA1/CD39 (nucleoside phosphatase) family	Q8H1D8|APY4_ARATH|-117.2|Probable apyrase 4 OS=Arabidopsis thaliana GN=APY4 PE=2 SV=1	XP_020255501.1|-156.8|probable apyrase 6 [Asparagus officinalis]
c177072_g1	-	-	4641.GSMUA_Achr9P09570_001|-53.9|ENOG410YAE8|S|NA	-	-	XP_020682127.1|-60.6|uncharacterized protein LOC110099350 [Dendrobium catenatum]
c176517_g1	-	-	3847.GLYMA08G09610.2|-112.5|ENOG4111JVH|S|Remorin family	-	-	XP_020260162.1|-108.1|uncharacterized protein LOC109836614 [Asparagus officinalis]
c70729_g1	-	-	-	-	-	WP_060978062.1|-54.1|MULTISPECIES: AcrB/AcrD/AcrF family protein [Proteobacteria]
c204120_g1	-	-	3694.POPTR_0006s24310.1|-103.7|ENOG410YG6W|S|IQ calmodulin-binding motif	-	-	XP_008793214.1|-117.9|PREDICTED: protein IQ-DOMAIN 1-like isoform X1 [Phoenix dactylifera]
c204264_g1	biological_process:cellular response to exogenous dsRNA(GO:0071360);;cellular_component:nuclear pericentric heterochromatin(GO:0031618);;molecular_function:DNA binding(GO:0003677);;biological_process:RNA-directed DNA methylation(GO:0080188);;biological_process:DNA methylation on cytosine(GO:0032776);;molecular_function:helicase activity(GO:0004386);;cellular_component:RNA polymerase IV transcript…	egu:105042242|-255.5|K10875|RAD54L, RAD54; DNA repair and recombination protein RAD54 and RAD54-like protein [EC:3.6.4.-]|ko03440|Homologous recombination;;	3694.POPTR_0009s12350.1|-244.5|COG0553|L|helicase	-	Q9SIW2|CHR35_ARATH|-208.8|Protein CHROMATIN REMODELING 35 OS=Arabidopsis thaliana GN=DRD1 PE=1 SV=1	XP_020277382.1|-10000.0|protein CHROMATIN REMODELING 35 [Asparagus officinalis]
c199232_g1	-	-	-	-	-	XP_020276006.1|-56.7|uncharacterized protein LOC109850395 [Asparagus officinalis]
c232219_g1	-	-	39947.LOC_Os04g21210.1|-224.0|COG2801|L|Retrotransposon protein	-	-	GAU32901.1|-213.9|hypothetical protein TSUD_393220 [Trifolium subterraneum]
c228599_g4	biological_process:phosphorylation(GO:0016310);;cellular_component:spindle(GO:0005819);;molecular_function:transferase activity(GO:0016740);;cellular_component:spindle(GO:0005819);;biological_process:cell division(GO:0051301);;cellular_component:cytoskeleton(GO:0005856);;cellular_component:microtubule(GO:0005874);;biological_process:cell cycle(GO:0007049);;biological_process:cellularization(GO:00…	-	3847.GLYMA13G28570.1|-112.7|ENOG410XRQ6|T|Serine threonine kinase	-	F4JY37|RUK_ARATH|-83.5|Serine/threonine-protein kinase RUNKEL OS=Arabidopsis thaliana GN=RUK PE=1 SV=1	XP_008796195.1|-137.2|PREDICTED: serine/threonine-protein kinase RUNKEL isoform X1 [Phoenix dactylifera]
c135451_g2	-	-	-	-	-	OHC96589.1|-88.4|hypothetical protein A2792_19635 [Sphingomonadales bacterium RIFCSPHIGHO2_01_FULL_65_20]
c94163_g1	-	-	59689.fgenesh2_kg.4__2185__AT2G40660.1|-100.6|COG0073|J|Is required not only for elongation of protein synthesis but also for the initiation of all mRNA translation through initiator tRNA(fMet) aminoacylation (By similarity)	-	-	XP_020277043.1|-125.4|aminoacyl tRNA synthase complex-interacting multifunctional protein 1 [Asparagus officinalis]
c215344_g3	-	-	15368.BRADI1G54730.1|-150.2|ENOG41115S5|S|WW domain binding protein 11	-	-	XP_021292133.1|-152.6|formin-like protein 5 [Herrania umbratica]
c230744_g1	-	-	-	-	-	XP_019105538.1|-55.9|PREDICTED: uncharacterized protein LOC109135252 [Beta vulgaris subsp. vulgaris]
c150995_g1	-	-	-	-	-	WP_062345365.1|-69.5|hypothetical protein [Novosphingobium sp. CCH12-A3]
c151014_g1	-	-	-	-	-	OAY70025.1|-48.8|hypothetical protein ACMD2_06580 [Ananas comosus]
c214176_g1	cellular_component:plastid(GO:0009536);;molecular_function:oxidoreductase activity(GO:0016491);;biological_process:oxidation-reduction process(GO:0055114);;molecular_function:phosphoglycerate dehydrogenase activity(GO:0004617);;cellular_component:chloroplast(GO:0009507);;cellular_component:chloroplast(GO:0009507)	gra:105783122|-84.4|K00058|serA, PHGDH; D-3-phosphoglycerate dehydrogenase [EC:1.1.1.95]|ko00260|Glycine, serine and threonine metabolism;;ko01200|Carbon metabolism;;ko01230|Biosynthesis of amino acids;;	3694.POPTR_0009s09950.1|-83.1|COG0111|E|Dehydrogenase	-	O49485|SERA1_ARATH|-83.0|D-3-phosphoglycerate dehydrogenase 1, chloroplastic OS=Arabidopsis thaliana GN=PGDH1 PE=1 SV=1	XP_020265568.1|-85.3|D-3-phosphoglycerate dehydrogenase 1, chloroplastic isoform X1 [Asparagus officinalis]
c161931_g1	molecular_function:ATP binding(GO:0005524);;cellular_component:plasma membrane(GO:0005886);;cellular_component:plasma membrane(GO:0005886);;biological_process:protein phosphorylation(GO:0006468);;biological_process:auxin-activated signaling pathway(GO:0009734);;biological_process:basipetal auxin transport(GO:0010540);;cellular_component:membrane(GO:0016020);;molecular_function:kinase activity(GO:…	-	29760.VIT_19s0015g00770.t01|-225.2|ENOG410XQ0C|T|serine threonine-protein kinase	-	Q39183|D6KL2_ARATH|-219.3|Serine/threonine-protein kinase D6PKL2 OS=Arabidopsis thaliana GN=D6PKL2 PE=1 SV=1	XP_020274382.1|-246.2|serine/threonine-protein kinase D6PKL1-like [Asparagus officinalis]
c225256_g1	-	-	-	-	-	XP_020268143.1|-52.1|zeaxanthin epoxidase, chloroplastic [Asparagus officinalis]
c214176_g2	cellular_component:plastid(GO:0009536);;molecular_function:oxidoreductase activity(GO:0016491);;biological_process:oxidation-reduction process(GO:0055114);;molecular_function:phosphoglycerate dehydrogenase activity(GO:0004617);;cellular_component:chloroplast(GO:0009507);;cellular_component:chloroplast(GO:0009507)	egu:105049537|-53.9|K00058|serA, PHGDH; D-3-phosphoglycerate dehydrogenase [EC:1.1.1.95]|ko00260|Glycine, serine and threonine metabolism;;ko01200|Carbon metabolism;;ko01230|Biosynthesis of amino acids;;	4577.GRMZM2G081886_P01|-55.1|COG0111|E|Dehydrogenase	-	O49485|SERA1_ARATH|-51.9|D-3-phosphoglycerate dehydrogenase 1, chloroplastic OS=Arabidopsis thaliana GN=PGDH1 PE=1 SV=1	ONK70308.1|-55.5|uncharacterized protein A4U43_C05F32390 [Asparagus officinalis]
c218968_g1	-	-	4555.Si001465m|-151.3|ENOG4111JVR|S|f-box only protein	-	Q9FZK1|FBX6_ARATH|-125.6|F-box only protein 6 OS=Arabidopsis thaliana GN=FBX6 PE=2 SV=1	ONK56159.1|-169.2|uncharacterized protein A4U43_C10F4750 [Asparagus officinalis]
c110030_g1	-	-	4555.Si030159m|-167.0|COG0667|C|Aldo keto reductase	-	-	XP_009420202.1|-170.4|PREDICTED: flagellar radial spoke protein 5 [Musa acuminata subsp. malaccensis]
c214176_g3	cellular_component:plastid(GO:0009536);;molecular_function:oxidoreductase activity(GO:0016491);;biological_process:oxidation-reduction process(GO:0055114);;molecular_function:phosphoglycerate dehydrogenase activity(GO:0004617);;cellular_component:chloroplast(GO:0009507);;cellular_component:chloroplast(GO:0009507)	pmum:103335142|-112.2|K00058|serA, PHGDH; D-3-phosphoglycerate dehydrogenase [EC:1.1.1.95]|ko00260|Glycine, serine and threonine metabolism;;ko01200|Carbon metabolism;;ko01230|Biosynthesis of amino acids;;	3694.POPTR_0009s09950.1|-110.8|COG0111|E|Dehydrogenase	-	Q9LT69|SERA3_ARATH|-108.1|D-3-phosphoglycerate dehydrogenase 3, chloroplastic OS=Arabidopsis thaliana GN=PGDH3 PE=1 SV=1	XP_008236365.1|-111.4|PREDICTED: D-3-phosphoglycerate dehydrogenase 1, chloroplastic [Prunus mume]
c219461_g1	biological_process:transport(GO:0006810);;biological_process:carbohydrate transport(GO:0008643);;cellular_component:membrane(GO:0016020);;cellular_component:integral component of membrane(GO:0016021);;molecular_function:sugar transmembrane transporter activity(GO:0051119);;cellular_component:plasma membrane(GO:0005886);;cellular_component:plasma membrane(GO:0005886);;cellular_component:integral c…	-	4641.GSMUA_Achr5P01260_001|-92.7|ENOG4111M4R|U|sugar transporter	-	Q8RZQ8|SWT1A_ORYSJ|-89.0|Bidirectional sugar transporter SWEET1a OS=Oryza sativa subsp. japonica GN=SWEET1A PE=2 SV=1	XP_020255120.1|-97.1|bidirectional sugar transporter SWEET1a-like isoform X1 [Asparagus officinalis]
c139238_g1	biological_process:glycolytic process(GO:0006096);;molecular_function:oxidoreductase activity(GO:0016491);;biological_process:oxidation-reduction process(GO:0055114);;molecular_function:pyruvate dehydrogenase (acetyl-transferring) activity(GO:0004739);;cellular_component:mitochondrion(GO:0005739);;cellular_component:mitochondrial matrix(GO:0005759)	pper:PRUPE_ppa007259mg|-104.4|K00162|PDHB, pdhB; pyruvate dehydrogenase E1 component beta subunit [EC:1.2.4.1]|ko01200|Carbon metabolism;;ko00620|Pyruvate metabolism;;ko00020|Citrate cycle (TCA cycle);;ko00010|Glycolysis / Gluconeogenesis;;	4558.Sb07g025970.1|-105.6|COG0022|C|Dehydrogenase, E1 component	-	Q6Z1G7|ODPB1_ORYSJ|-104.6|Pyruvate dehydrogenase E1 component subunit beta-1, mitochondrial OS=Oryza sativa subsp. japonica GN=Os08g0536000 PE=2 SV=1	ACG32706.1|-103.8|pyruvate dehydrogenase E1 component subunit beta [Zea mays]
c201147_g1	cellular_component:chloroplast outer membrane(GO:0009707);;cellular_component:membrane(GO:0016020);;cellular_component:chloroplast(GO:0009507);;cellular_component:plastid outer membrane(GO:0009527);;cellular_component:plastid(GO:0009536)	-	4641.GSMUA_Achr6P31130_001|-161.9|COG4775|M|Gram-negative-bacterium-type cell outer membrane assembly	-	Q9C5J8|OEP80_ARATH|-63.3|Outer envelope protein 80, chloroplastic OS=Arabidopsis thaliana GN=OEP80 PE=2 SV=1	XP_020270420.1|-180.9|outer envelope protein 80, chloroplastic [Asparagus officinalis]
c179240_g1	-	-	-	-	-	WP_066044442.1|-109.0|MULTISPECIES: potassium-transporting ATPase subunit B [Proteobacteria]
c144051_g1	-	-	-	-	-	KTE12857.1|-107.8|carbamoyltransferase [Sphingopyxis sp. H115]
c223307_g1	-	-	15368.BRADI5G01942.1|-104.7|ENOG4111T8J|S|transposon protein	-	-	XP_016740977.1|-153.3|PREDICTED: zinc finger BED domain-containing protein RICESLEEPER 2-like [Gossypium hirsutum]
c206576_g1	cellular_component:nucleus(GO:0005634);;biological_process:response to toxic substance(GO:0009636);;molecular_function:oxidoreductase activity(GO:0016491);;molecular_function:transferase activity(GO:0016740);;biological_process:oxidation-reduction process(GO:0055114);;molecular_function:glutathione transferase activity(GO:0004364);;molecular_function:peroxidase activity(GO:0004601);;cellular_comp…	vvi:100242689|-80.3|K00799|GST, gst; glutathione S-transferase [EC:2.5.1.18]|ko00480|Glutathione metabolism;;	29760.VIT_02s0025g03620.t01|-81.5|COG0625|O|glutathione Stransferase	-	Q9ZRT5|GSTT1_ARATH|-76.9|Glutathione S-transferase T1 OS=Arabidopsis thaliana GN=GSTT1 PE=2 SV=1	ANH58215.1|-86.7|glutathione S-transferase [Dracaena cambodiana]
c73678_g1	cellular_component:cytoplasm(GO:0005737);;cellular_component:cytoplasm(GO:0005737)	-	39947.LOC_Os11g43900.1|-80.4|ENOG4111FVP|S|tumor protein	-	P35681|TCTP_ORYSJ|-81.6|Translationally-controlled tumor protein homolog OS=Oryza sativa subsp. japonica GN=TCTP PE=1 SV=1	XP_020277302.1|-81.1|translationally-controlled tumor protein homolog isoform X1 [Asparagus officinalis]
c171761_g1	cellular_component:ribosome(GO:0005840);;cellular_component:intracellular ribonucleoprotein complex(GO:0030529)	egu:105034454|-106.8|K02865|RP-L10Ae, RPL10A; large subunit ribosomal protein L10Ae|ko03010|Ribosome;;	3847.GLYMA19G37980.1|-105.7|COG0081|J|Binds directly to 23S rRNA. The L1 stalk is quite mobile in the ribosome, and is involved in E site tRNA release (By similarity)	-	P59230|R10A2_ARATH|-103.9|60S ribosomal protein L10a-2 OS=Arabidopsis thaliana GN=RPL10AB PE=1 SV=1	XP_020693990.1|-106.9|60S ribosomal protein L10a-like [Dendrobium catenatum]
c102492_g1	-	rge:RGE_27120|-51.6|K04043|dnaK; molecular chaperone DnaK|ko03018|RNA degradation;;	-	-	-	OGA84335.1|-52.3|molecular chaperone DnaK [Burkholderiales bacterium RIFCSPHIGHO2_01_FULL_63_240]
c193921_g1	biological_process:glycerol metabolic process(GO:0006071);;molecular_function:glycerophosphodiester phosphodiesterase activity(GO:0008889);;molecular_function:hydrolase activity(GO:0016787)	egu:105033167|-180.1|K01126|E3.1.4.46, glpQ, ugpQ; glycerophosphoryl diester phosphodiesterase [EC:3.1.4.46]|ko00564|Glycerophospholipid metabolism;;	4641.GSMUA_Achr6P34970_001|-177.3|COG0584|C|glycerophosphoryl diester phosphodiesterase	PF03009.15|GDPD|3.3e-64|Glycerophosphoryl diester phosphodiesterase family	Q9SD81|GDPD6_ARATH|-157.1|Glycerophosphodiester phosphodiesterase GDPD6 OS=Arabidopsis thaliana GN=GDPD6 PE=2 SV=1	XP_010906159.1|-179.3|PREDICTED: glycerophosphodiester phosphodiesterase GDPD6 [Elaeis guineensis]
c221894_g1	-	-	29760.VIT_10s0003g01400.t01|-78.8|ENOG410ZQU1|T|LRR receptor-like serine threonine-protein kinase	-	-	XP_020099718.1|-83.9|protein MALE DISCOVERER 1-like isoform X1 [Ananas comosus]
c228736_g2	-	mus:103988932|-63.1|K19476|IST1; vacuolar protein sorting-associated protein IST1|ko04144|Endocytosis;;	4641.GSMUA_Achr6P24100_001|-64.4|ENOG410YG52|S|positive regulation of collateral sprouting	-	-	XP_009405897.1|-62.3|PREDICTED: uncharacterized protein LOC103988932 [Musa acuminata subsp. malaccensis]
c221750_g1	biological_process:proteolysis(GO:0006508);;molecular_function:peptidase activity(GO:0008233);;cellular_component:endosome membrane(GO:0010008);;cellular_component:endosome membrane(GO:0010008);;cellular_component:membrane(GO:0016020);;cellular_component:integral component of membrane(GO:0016021);;molecular_function:hydrolase activity(GO:0016787);;molecular_function:metal ion binding(GO:0046872);…	-	4641.GSMUA_Achr10P21030_001|-166.8|ENOG410XX0H|E|carboxy-peptidase	PF00246.22|Peptidase_M14|4.3e-60|Zinc carboxypeptidase	Q9M9H7|SOL1_ARATH|-147.7|Carboxypeptidase SOL1 OS=Arabidopsis thaliana GN=SOL1 PE=2 SV=1	XP_010915069.1|-169.3|PREDICTED: carboxypeptidase SOL1 [Elaeis guineensis]
c221894_g2	-	-	29760.VIT_10s0003g01400.t01|-89.1|ENOG410ZQU1|T|LRR receptor-like serine threonine-protein kinase	-	-	XP_020263974.1|-120.3|protein MALE DISCOVERER 2-like [Asparagus officinalis]
c205182_g1	cellular_component:plastid(GO:0009536);;cellular_component:chloroplast stroma(GO:0009570);;molecular_function:lyase activity(GO:0016829);;molecular_function:metal ion binding(GO:0046872);;molecular_function:iron-sulfur cluster binding(GO:0051536);;molecular_function:4 iron, 4 sulfur cluster binding(GO:0051539);;biological_process:thiamine biosynthetic process(GO:0009228);;biological_process:thiam…	pxb:103963218|-10000.0|K03147|thiC; phosphomethylpyrimidine synthase [EC:4.1.99.17]|ko00730|Thiamine metabolism;;	3694.POPTR_0009s04780.1|-10000.0|COG0422|H|thiamine diphosphate biosynthetic process	PF01964.16|ThiC_Rad_SAM|9.2e-196|Radical SAM ThiC family	O82392|THIC_ARATH|-10000.0|Phosphomethylpyrimidine synthase, chloroplastic OS=Arabidopsis thaliana GN=THIC PE=1 SV=1	XP_020252397.1|-10000.0|phosphomethylpyrimidine synthase, chloroplastic [Asparagus officinalis]
c204545_g1	cellular_component:cytoskeleton(GO:0005856);;molecular_function:actin binding(GO:0003779);;cellular_component:cytoplasm(GO:0005737);;cellular_component:cytoskeleton(GO:0005856)	pda:103723066|-126.1|K01595|ppc; phosphoenolpyruvate carboxylase [EC:4.1.1.31]|ko00710|Carbon fixation in photosynthetic organisms;;ko00620|Pyruvate metabolism;;ko01200|Carbon metabolism;;	4641.GSMUA_AchrUn_randomP21650_001|-118.2|ENOG410XRBQ|S|WAS protein family, member	-	Q5QNA6|SCRL2_ORYSJ|-106.9|SCAR-like protein 2 OS=Oryza sativa subsp. japonica GN=Os01g0208600 PE=2 SV=1	XP_020244597.1|-151.5|SCAR-like protein 2 [Asparagus officinalis]
c215625_g1	-	-	4533.OB05G29130.1|-92.7|COG2264|J|Methylates ribosomal protein L11 (By similarity)	PF06325.11|PrmA|1e-73|Ribosomal protein L11 methyltransferase (PrmA)	-	ONK65537.1|-103.9|uncharacterized protein A4U43_C07F38120 [Asparagus officinalis]
c164468_g1	cellular_component:chloroplast(GO:0009507);;cellular_component:chloroplast(GO:0009507);;cellular_component:plastid(GO:0009536)	-	4641.GSMUA_Achr6P15220_001|-106.2|COG0702|GM|epimerase dehydratase	-	O80934|Y2766_ARATH|-102.4|Uncharacterized protein At2g37660, chloroplastic OS=Arabidopsis thaliana GN=At2g37660 PE=1 SV=2	XP_010920552.1|-107.5|PREDICTED: uncharacterized protein At5g02240 [Elaeis guineensis]
c105972_g1	-	-	-	-	-	WP_012452092.1|-60.1|circadian clock protein KaiC [Methylobacterium populi]
c220108_g1	cellular_component:integral component of membrane(GO:0016021);;molecular_function:transferase activity(GO:0016740);;molecular_function:transferase activity, transferring glycosyl groups(GO:0016757);;molecular_function:metal ion binding(GO:0046872);;biological_process:cell wall organization(GO:0071555);;cellular_component:Golgi membrane(GO:0000139);;cellular_component:Golgi apparatus(GO:0005794);;…	-	39947.LOC_Os01g65780.1|-259.7|COG5597|O|Glycosyl Transferase	-	Q9LSB1|GUX1_ARATH|-206.6|UDP-glucuronate:xylan alpha-glucuronosyltransferase 1 OS=Arabidopsis thaliana GN=GUX1 PE=2 SV=1	ONK73318.1|-303.1|uncharacterized protein A4U43_C04F29670 [Asparagus officinalis]
c231662_g2	-	-	-	-	-	XP_017233615.1|-68.8|PREDICTED: uncharacterized protein LOC108207692 [Daucus carota subsp. sativus]
c105972_g2	-	-	-	-	-	WP_012452092.1|-70.2|circadian clock protein KaiC [Methylobacterium populi]
c216262_g5	biological_process:transcription, DNA-templated(GO:0006351);;biological_process:regulation of transcription, DNA-templated(GO:0006355);;biological_process:multicellular organism development(GO:0007275);;molecular_function:DNA binding(GO:0003677);;cellular_component:nucleus(GO:0005634);;cellular_component:nucleus(GO:0005634)	-	4641.GSMUA_Achr5P10530_001|-97.5|ENOG410YD0M|S|NA	-	Q9XIN0|LHW_ARATH|-63.8|Transcription factor LHW OS=Arabidopsis thaliana GN=LHW PE=1 SV=1	XP_020248171.1|-157.7|transcription factor bHLH157-like isoform X1 [Asparagus officinalis]
c162519_g1	-	-	4081.Solyc09g064860.2.1|-76.8|ENOG41120F4|S|NA	-	-	XP_020275289.1|-80.6|uncharacterized protein LOC109849817 isoform X2 [Asparagus officinalis]
c117215_g1	-	-	4641.GSMUA_Achr4P10200_001|-54.4|COG0451|M|Nad-dependent epimerase dehydratase	-	-	XP_020254226.1|-58.4|LOW QUALITY PROTEIN: uncharacterized protein LOC109831306 [Asparagus officinalis]
c146281_g1	cellular_component:plastid(GO:0009536);;molecular_function:protein binding(GO:0005515);;cellular_component:chloroplast(GO:0009507);;cellular_component:chloroplast(GO:0009507)	-	4641.GSMUA_Achr5P18820_001|-67.7|COG0542|O|ATP-dependent CLP protease ATP-binding subunit	-	Q93WL3|CLPT1_ARATH|-58.4|ATP-dependent Clp protease ATP-binding subunit CLPT1, chloroplastic OS=Arabidopsis thaliana GN=CLPT1 PE=1 SV=1	XP_020274647.1|-76.8|ATP-dependent Clp protease ATP-binding subunit CLPT1, chloroplastic-like [Asparagus officinalis]
c157361_g1	biological_process:lipid catabolic process(GO:0016042);;molecular_function:hydrolase activity(GO:0016787);;cellular_component:extracellular region(GO:0005576);;cellular_component:extracellular region(GO:0005576);;biological_process:lipid metabolic process(GO:0006629)	-	3847.GLYMA16G26020.1|-147.3|ENOG410ZH2N|S|GDSL esterase lipase	-	O80470|GDL38_ARATH|-140.6|GDSL esterase/lipase At2g23540 OS=Arabidopsis thaliana GN=At2g23540 PE=2 SV=1	XP_020254815.1|-152.2|GDSL esterase/lipase At2g23540-like [Asparagus officinalis]
c87481_g1	biological_process:transcription, DNA-templated(GO:0006351);;biological_process:regulation of transcription, DNA-templated(GO:0006355);;biological_process:flower development(GO:0009908);;molecular_function:DNA binding(GO:0003677);;cellular_component:nucleus(GO:0005634);;cellular_component:nucleus(GO:0005634)	-	4641.GSMUA_Achr9P28330_001|-80.1|COG5147|K|Myblike DNAbinding domain containing protein	-	O80931|AS1_ARATH|-80.6|Transcription factor AS1 OS=Arabidopsis thaliana GN=AS1 PE=1 SV=1	XP_009419262.1|-78.1|PREDICTED: protein rough sheath 2 homolog [Musa acuminata subsp. malaccensis]
c219742_g2	-	-	4641.GSMUA_Achr5P05680_001|-78.0|ENOG4111KG5|S|expressed protein	-	-	XP_010939419.1|-92.9|PREDICTED: uncharacterized protein LOC105058238 [Elaeis guineensis]
c174236_g2	biological_process:protein ubiquitination(GO:0016567)	-	29760.VIT_07s0129g00250.t01|-100.2|ENOG410YBGR|S|BTB POZ domain-containing protein	-	Q0WL52|NPY5_ARATH|-92.1|BTB/POZ domain-containing protein NPY5 OS=Arabidopsis thaliana GN=NPY5 PE=2 SV=2	XP_008777297.1|-100.9|PREDICTED: BTB/POZ domain-containing protein NPY4-like [Phoenix dactylifera]
c231662_g6	-	-	4641.GSMUA_AchrUn_randomP11040_001|-67.6|COG2801|L|Retrotransposon protein	-	-	XP_017227761.1|-75.7|PREDICTED: uncharacterized protein LOC108203368 [Daucus carota subsp. sativus]
c197177_g1	biological_process:oxidation-reduction process(GO:0055114);;molecular_function:oxidoreductase activity(GO:0016491);;molecular_function:metal ion binding(GO:0046872);;molecular_function:dioxygenase activity(GO:0051213)	-	29760.VIT_07s0031g00100.t01|-137.6|COG3491|S|2OGFe(II) oxygenase	-	F4IY03|DIOX1_ARATH|-114.6|Probable 2-oxoglutarate-dependent dioxygenase At3g49630 OS=Arabidopsis thaliana GN=At3g49630 PE=3 SV=1	XP_020276904.1|-147.2|probable 2-oxoglutarate-dependent dioxygenase At3g49630 [Asparagus officinalis]
c179665_g1	cellular_component:nucleus(GO:0005634);;biological_process:transcription, DNA-templated(GO:0006351);;biological_process:regulation of transcription, DNA-templated(GO:0006355);;molecular_function:DNA binding(GO:0003677);;molecular_function:calmodulin binding(GO:0005516);;cellular_component:nucleus(GO:0005634)	-	4641.GSMUA_Achr6P10390_001|-82.7|ENOG411036B|S|IQ calmodulin-binding motif	-	Q6NPP4|CMTA2_ARATH|-64.5|Calmodulin-binding transcription activator 2 OS=Arabidopsis thaliana GN=CMTA2 PE=1 SV=1	XP_020255716.1|-86.0|LOW QUALITY PROTEIN: calmodulin-binding transcription activator 3-like [Asparagus officinalis]
c224225_g1	-	-	39947.LOC_Os02g30880.1|-80.4|COG2801|L|Retrotransposon protein	-	-	CAN67821.1|-121.3|hypothetical protein VITISV_025855, partial [Vitis vinifera]
c144476_g1	-	-	4641.GSMUA_Achr9P08400_001|-149.7|ENOG410XPCC|S|ran binding protein	-	-	XP_020249588.1|-154.7|ran-binding protein 10-like [Asparagus officinalis]
c227342_g9	cellular_component:membrane(GO:0016020);;cellular_component:membrane(GO:0016020);;cellular_component:integral component of membrane(GO:0016021);;biological_process:transport(GO:0006810);;biological_process:ion transport(GO:0006811);;biological_process:zinc II ion transport(GO:0006829)	-	4641.GSMUA_Achr10P04960_001|-245.0|COG0428|P|zinc transporter	-	Q9C9Z1|ZTP50_ARATH|-218.3|Putative zinc transporter At3g08650 OS=Arabidopsis thaliana GN=At3g08650 PE=2 SV=2	OAY80209.1|-252.6|putative zinc transporter [Ananas comosus]
c224369_g1	cellular_component:Golgi apparatus(GO:0005794);;cellular_component:Golgi apparatus(GO:0005794)	-	29760.VIT_04s0210g00200.t01|-247.8|ENOG410XSCF|S|NA	-	Q8S2T0|GRIP_ARATH|-217.7|Protein GRIP OS=Arabidopsis thaliana GN=GRIP PE=1 SV=2	XP_020248946.1|-301.6|protein GRIP [Asparagus officinalis]
c224225_g2	-	-	-	-	-	XP_011624299.1|-58.2|uncharacterized protein LOC105420836, partial [Amborella trichopoda]
c218430_g1	cellular_component:integral component of membrane(GO:0016021);;molecular_function:oxidoreductase activity(GO:0016491);;molecular_function:metal ion binding(GO:0046872);;biological_process:oxidation-reduction process(GO:0055114);;molecular_function:monooxygenase activity(GO:0004497);;cellular_component:membrane(GO:0016020);;cellular_component:membrane(GO:0016020)	-	4641.GSMUA_Achr1P03820_001|-192.0|COG2124|Q|Cytochrome p450	PF00067.20|p450|3.7e-75|Cytochrome P450	Q50EK3|C04C1_PINTA|-140.1|Cytochrome P450 704C1 OS=Pinus taeda GN=CYP704C1 PE=2 SV=1	XP_020248437.1|-208.2|cytochrome P450 704C1-like [Asparagus officinalis]
c179665_g3	cellular_component:nucleus(GO:0005634);;biological_process:transcription, DNA-templated(GO:0006351);;biological_process:regulation of transcription, DNA-templated(GO:0006355);;molecular_function:DNA binding(GO:0003677);;molecular_function:calmodulin binding(GO:0005516);;cellular_component:nucleus(GO:0005634)	-	29760.VIT_07s0141g00250.t01|-193.2|ENOG41128X0|K|calmodulin-binding transcription activator	-	Q8GSA7|CMTA3_ARATH|-166.4|Calmodulin-binding transcription activator 3 OS=Arabidopsis thaliana GN=CMTA3 PE=1 SV=1	XP_008795548.1|-223.6|PREDICTED: calmodulin-binding transcription activator 3-like isoform X2 [Phoenix dactylifera]
c68327_g1	-	-	-	-	-	WP_060979801.1|-51.1|MULTISPECIES: hypothetical protein [Proteobacteria]
c309403_g1	-	-	-	-	-	WP_056435648.1|-50.9|hypothetical protein [Sphingomonas sp. Leaf257]
c102999_g1	-	-	-	-	-	WP_060977215.1|-102.5|MULTISPECIES: LysR family transcriptional regulator [Proteobacteria]
c217937_g2	-	-	29760.VIT_06s0080g00880.t01|-232.6|ENOG410XQZK|S|regulation of signal transduction	-	-	XP_020245962.1|-251.2|nicalin [Asparagus officinalis]
c210951_g1	biological_process:chorismate biosynthetic process(GO:0009423);;cellular_component:chloroplast(GO:0009507);;cellular_component:chloroplast(GO:0009507);;cellular_component:plastid(GO:0009536);;molecular_function:transferase activity(GO:0016740);;molecular_function:3-deoxy-7-phosphoheptulonate synthase activity(GO:0003849);;biological_process:cellular amino acid biosynthetic process(GO:0008652);;bi…	nnu:104604561|-243.6|K01626|E2.5.1.54, aroF, aroG, aroH; 3-deoxy-7-phosphoheptulonate synthase [EC:2.5.1.54]|ko01230|Biosynthesis of amino acids;;ko00400|Phenylalanine, tyrosine and tryptophan biosynthesis;;	29760.VIT_18s0001g06250.t01|-241.5|COG3200|E|phospho-2-dehydro-3-deoxyheptonate aldolase	PF01474.14|DAHP_synth_2|1.6e-196|Class-II DAHP synthetase family	P27608|AROF_TOBAC|-241.6|Phospho-2-dehydro-3-deoxyheptonate aldolase 1, chloroplastic OS=Nicotiana tabacum GN=DHAPS-1 PE=2 SV=1	OUZ99614.1|-247.8|DAHP synthetase [Macleaya cordata]
c113997_g1	-	-	-	-	-	KTE66243.1|-67.9|conjugal transfer protein TrbG [Sphingopyxis sp. H081]
c217937_g3	-	-	4641.GSMUA_Achr6P11600_001|-101.3|ENOG4111EZQ|S|smr domain containing protein	-	-	AIZ68162.1|-134.5|polyadenylate-binding protein-interacting protein 7-like isoform X2 [Ornithogalum longebracteatum]
c27261_g1	-	-	-	-	-	WP_066920734.1|-60.5|hypothetical protein [Methylobacterium sp. CCH5-D2]
c229798_g3	-	-	4641.GSMUA_Achr3P03160_001|-76.5|ENOG4111I9Z|S|RAN guanine nucleotide release factor	-	-	XP_010937086.1|-76.3|PREDICTED: ran guanine nucleotide release factor isoform X1 [Elaeis guineensis]
c204908_g1	molecular_function:hydrolase activity(GO:0016787);;molecular_function:pectinesterase activity(GO:0030599);;molecular_function:aspartyl esterase activity(GO:0045330);;biological_process:pectin catabolic process(GO:0045490);;biological_process:cell wall organization(GO:0071555);;cellular_component:extracellular region(GO:0005576);;cellular_component:cell wall(GO:0005618);;cellular_component:cell wa…	-	3694.POPTR_0003s07030.1|-186.4|COG4677|G|pectinesterase	PF01095.17|Pectinesterase|1.5e-135|Pectinesterase	Q43111|PME3_PHAVU|-167.1|Pectinesterase 3 OS=Phaseolus vulgaris GN=MPE3 PE=2 SV=1	XP_008797350.1|-201.2|PREDICTED: pectinesterase 3 [Phoenix dactylifera]
c251260_g1	molecular_function:phosphoprotein phosphatase activity(GO:0004721);;molecular_function:protein tyrosine phosphatase activity(GO:0004725);;molecular_function:hydrolase activity(GO:0016787)	-	3694.POPTR_0004s00440.1|-77.8|COG2365|T|protein tyrosine serine phosphatase	PF03162.11|Y_phosphatase2|1.6e-60|Tyrosine phosphatase family	Q9ZVN4|Y1500_ARATH|-72.9|Probable tyrosine-protein phosphatase At1g05000 OS=Arabidopsis thaliana GN=At1g05000 PE=1 SV=1	XP_020265521.1|-87.6|probable tyrosine-protein phosphatase At1g05000 [Asparagus officinalis]
c216769_g1	-	-	4081.Solyc03g007840.1.1|-222.9|ENOG410Z7Z7|S|Pentatricopeptide repeat-containing protein	-	P0C899|PP271_ARATH|-211.1|Putative pentatricopeptide repeat-containing protein At3g49142 OS=Arabidopsis thaliana GN=PCMP-H77 PE=3 SV=1	XP_008800173.1|-259.1|PREDICTED: putative pentatricopeptide repeat-containing protein At3g49142 [Phoenix dactylifera]
c217180_g1	molecular_function:hydrolase activity(GO:0016787);;biological_process:beta-alanine biosynthetic process(GO:0019483);;molecular_function:beta-ureidopropionase activity(GO:0003837);;cellular_component:cytoplasm(GO:0005737);;cellular_component:cytoplasm(GO:0005737)	pda:103712168|-204.4|K01431|UPB1, pydC; beta-ureidopropionase [EC:3.5.1.6]|ko00770|Pantothenate and CoA biosynthesis;;ko00240|Pyrimidine metabolism;;ko00410|beta-Alanine metabolism;;	39947.LOC_Os07g30170.1|-201.6|COG0388|S|nitrilase cyanide hydratase and apolipoprotein n-acyltransferase	-	Q8H183|BUP1_ARATH|-195.5|Beta-ureidopropionase OS=Arabidopsis thaliana GN=PYD3 PE=1 SV=1	XP_008796836.1|-203.6|PREDICTED: beta-ureidopropionase [Phoenix dactylifera]
c95362_g1	-	-	-	-	-	WP_081097148.1|-66.9|MULTISPECIES: hypothetical protein [Proteobacteria]
c228260_g1	-	-	4641.GSMUA_Achr3P02030_001|-51.5|ENOG410Y3P9|O|Ubox domain-containing protein	-	-	XP_010936891.1|-54.7|PREDICTED: U-box domain-containing protein 21-like [Elaeis guineensis]
c101461_g1	-	-	3694.POPTR_0003s14720.1|-62.1|ENOG4111I4P|S|alpha/beta hydrolase fold	-	-	XP_008780292.1|-70.7|PREDICTED: uncharacterized protein LOC103700097 [Phoenix dactylifera]
c100968_g1	molecular_function:GTPase activator activity(GO:0005096);;molecular_function:protein binding(GO:0005515)	-	4641.GSMUA_Achr7P23620_001|-238.8|COG5044|O|GDP dissociation inhibitor	PF00996.16|GDI|7.4e-232|GDP dissociation inhibitor	Q96254|GDI1_ARATH|-224.0|Guanosine nucleotide diphosphate dissociation inhibitor 1 OS=Arabidopsis thaliana GN=GDI1 PE=1 SV=1	XP_020261885.1|-244.8|guanosine nucleotide diphosphate dissociation inhibitor 1 [Asparagus officinalis]
c176548_g1	-	-	-	-	-	WP_060979635.1|-61.5|MULTISPECIES: enoyl-CoA hydratase [Proteobacteria]
c123621_g1	-	-	-	-	-	OHC97906.1|-95.3|peptidase M16 [Sphingomonadales bacterium RIFCSPHIGHO2_01_FULL_65_20]
c176548_g2	-	sphp:LH20_18705|-68.2|K01692|paaF, echA; enoyl-CoA hydratase [EC:4.2.1.17]|ko00071|Fatty acid degradation;;ko00380|Tryptophan metabolism;;ko00310|Lysine degradation;;ko00410|beta-Alanine metabolism;;ko00903|Limonene and pinene degradation;;ko00280|Valine, leucine and isoleucine degradation;;ko01212|Fatty acid metabolism;;ko00650|Butanoate metabolism;;ko00640|Propanoate metabolism;;ko00360|Phenyla…	-	PF16113.3|ECH_2|2.3e-69|Enoyl-CoA hydratase/isomerase	-	WP_060979635.1|-85.4|MULTISPECIES: enoyl-CoA hydratase [Proteobacteria]
c221108_g1	molecular_function:phosphoprotein phosphatase activity(GO:0004721);;molecular_function:hydrolase activity(GO:0016787)	-	3711.Bra028684.1-P|-189.2|ENOG410XQR0|S|inverted formin, FH2 and WH2 domain containing	-	Q84ZL0|FH5_ORYSJ|-193.0|Formin-like protein 5 OS=Oryza sativa subsp. japonica GN=FH5 PE=2 SV=2	XP_006345218.1|-190.0|PREDICTED: formin-like protein 20 [Solanum tuberosum]
c249927_g1	biological_process:isoleucine biosynthetic process(GO:0009097);;biological_process:valine biosynthetic process(GO:0009099);;cellular_component:chloroplast(GO:0009507);;cellular_component:chloroplast(GO:0009507);;cellular_component:plastid(GO:0009536);;biological_process:response to herbicide(GO:0009635);;molecular_function:transferase activity(GO:0016740);;molecular_function:metal ion binding(GO:…	egu:105038802|-283.8|K01652|E2.2.1.6L, ilvB, ilvG, ilvI; acetolactate synthase I/II/III large subunit [EC:2.2.1.6]|ko00660|C5-Branched dibasic acid metabolism;;ko00290|Valine, leucine and isoleucine biosynthesis;;ko00770|Pantothenate and CoA biosynthesis;;ko00650|Butanoate metabolism;;ko01210|2-Oxocarboxylic acid metabolism;;ko01230|Biosynthesis of amino acids;;	15368.BRADI5G08220.1|-278.0|COG0028|E|acetolactate synthase	-	Q6K2E8|ILVB1_ORYSJ|-278.1|Acetolactate synthase 1, chloroplastic OS=Oryza sativa subsp. japonica GN=ALS1 PE=2 SV=1	XP_010913007.1|-283.0|PREDICTED: acetolactate synthase 1, chloroplastic [Elaeis guineensis]
c232106_g1	-	-	39947.LOC_Os03g41624.1|-153.7|COG2801|L|Retrotransposon protein	-	-	XP_020272504.1|-258.3|LOW QUALITY PROTEIN: uncharacterized protein LOC109847685, partial [Asparagus officinalis]
c227623_g4	-	-	4641.GSMUA_Achr2P18470_001|-76.4|ENOG4110X8D|S|Kelch repeat-containing F-box family protein	-	-	XP_009590459.1|-79.1|PREDICTED: F-box/kelch-repeat protein At1g16250 [Nicotiana tomentosiformis]
c215231_g1	-	-	29760.VIT_06s0009g00370.t01|-55.3|ENOG410YC1Z|O|e3 ubiquitin-protein ligase	-	-	XP_008799744.2|-70.4|PREDICTED: E3 ubiquitin-protein ligase PUB23-like [Phoenix dactylifera]
c199263_g1	-	-	4641.GSMUA_Achr1P06710_001|-81.7|ENOG410YEXH|S|Hydroxyproline-rich glycoprotein family protein	-	-	XP_008787433.1|-83.0|PREDICTED: uncharacterized protein At1g76660 [Phoenix dactylifera]
c221108_g2	molecular_function:phosphoprotein phosphatase activity(GO:0004721);;molecular_function:hydrolase activity(GO:0016787)	-	4641.GSMUA_Achr7P26410_001|-113.2|ENOG410Y29H|S|Diaphanous homolog	PF02181.21|FH2|4.5e-68|Formin Homology 2 Domain	Q84ZL0|FH5_ORYSJ|-104.6|Formin-like protein 5 OS=Oryza sativa subsp. japonica GN=FH5 PE=2 SV=2	XP_017696746.1|-111.3|PREDICTED: LOW QUALITY PROTEIN: formin-like protein 12 [Phoenix dactylifera]
c226455_g1	-	-	-	-	-	XP_020276778.1|-94.2|uncharacterized protein LOC109851083 [Asparagus officinalis]
c225818_g1	-	-	15368.BRADI2G27160.1|-91.5|COG0484|O|ATP binding to DnaK triggers the release of the substrate protein, thus completing the reaction cycle. Several rounds of ATP-dependent interactions between DnaJ, DnaK and GrpE are required for fully efficient folding. Also involved, together with DnaK and GrpE, in the DNA replication of plasmids through activation of initiation proteins (By similarity)	-	-	XP_008796162.1|-104.0|PREDICTED: uncharacterized protein LOC103711698 isoform X2 [Phoenix dactylifera]
c226455_g2	-	-	4641.GSMUA_AchrUn_randomP08820_001|-121.6|ENOG410Y9P5|S|acyl-CoA N-acyltransferase with RING FYVE PHD-type zinc finger domain-containing protein	-	-	XP_020276778.1|-139.2|uncharacterized protein LOC109851083 [Asparagus officinalis]
c157642_g1	-	-	4641.GSMUA_Achr3P22340_001|-66.2|ENOG41125VK|S|Transmembrane protein 18	-	-	XP_008783402.1|-68.1|PREDICTED: transmembrane protein 18-like [Phoenix dactylifera]
c226599_g2	-	obr:102718259|-71.7|K01068|ACOT1_2_4; acyl-coenzyme A thioesterase 1/2/4 [EC:3.1.2.2]|ko01040|Biosynthesis of unsaturated fatty acids;;ko00062|Fatty acid elongation;;	4533.OB04G28410.1|-72.9|COG1946|I|acyl-CoA thioesterase	-	-	XP_020247395.1|-78.0|uncharacterized protein LOC109825086 [Asparagus officinalis]
c237679_g1	-	met:M446_2846|-68.5|K00681|ggt; gamma-glutamyltranspeptidase / glutathione hydrolase [EC:2.3.2.2 3.4.19.13]|ko00460|Cyanoamino acid metabolism;;ko00480|Glutathione metabolism;;ko00430|Taurine and hypotaurine metabolism;;	-	-	-	WP_066927179.1|-73.0|gamma-glutamyltransferase [Methylobacterium sp. CCH5-D2]
c76208_g1	-	mor:MOC_2040|-115.7|K03723|mfd; transcription-repair coupling factor (superfamily II helicase) [EC:3.6.4.-]|ko03420|Nucleotide excision repair;;	-	-	-	SFS71917.1|-115.8|transcription-repair coupling factor [Methylobacterium sp. yr668]
c186378_g1	biological_process:transcription, DNA-templated(GO:0006351);;biological_process:regulation of transcription, DNA-templated(GO:0006355);;biological_process:embryo development ending in seed dormancy(GO:0009793);;molecular_function:DNA binding(GO:0003677);;cellular_component:nucleus(GO:0005634);;cellular_component:nucleus(GO:0005634)	-	4641.GSMUA_Achr4P02380_001|-80.3|ENOG410YB53|K|nac domain	-	Q8GY42|NAC25_ARATH|-67.7|NAC transcription factor 25 OS=Arabidopsis thaliana GN=NAC025 PE=2 SV=1	XP_020254563.1|-85.9|NAC transcription factor 29-like, partial [Asparagus officinalis]
c226599_g4	-	mus:103993253|-89.3|K01068|ACOT1_2_4; acyl-coenzyme A thioesterase 1/2/4 [EC:3.1.2.2]|ko01040|Biosynthesis of unsaturated fatty acids;;ko00062|Fatty acid elongation;;	4555.Si010192m|-85.0|COG1946|I|acyl-CoA thioesterase	-	-	XP_020247395.1|-100.9|uncharacterized protein LOC109825086 [Asparagus officinalis]
c221026_g7	-	-	-	-	-	ONK59700.1|-109.4|uncharacterized protein A4U43_C08F9470 [Asparagus officinalis]
c28936_g1	-	egu:105053627|-73.8|K14572|MDN1, REA1; midasin|ko03008|Ribosome biogenesis in eukaryotes;;	4555.Si033824m|-67.2|COG5271|S|Nuclear chaperone required for maturation and nuclear export of pre-60S ribosome subunits (By similarity)	-	-	XP_010933177.1|-73.1|PREDICTED: midasin [Elaeis guineensis]
c156330_g1	-	-	3702.AT2G44090.1|-160.2|ENOG4110YQV|S|F-box ankyrin repeat protein	-	Q9M1Y3|SKI35_ARATH|-157.9|Ankyrin repeat protein SKIP35 OS=Arabidopsis thaliana GN=SKIP35 PE=1 SV=1	XP_008801302.1|-172.2|PREDICTED: ankyrin repeat protein SKIP35 [Phoenix dactylifera]
c218711_g1	biological_process:metabolic process(GO:0008152);;cellular_component:membrane(GO:0016020);;molecular_function:hydrolase activity(GO:0016787);;molecular_function:hydrolase activity, acting on glycosyl bonds(GO:0016798);;cellular_component:anchored component of membrane(GO:0031225);;molecular_function:glucan endo-1,3-beta-D-glucosidase activity(GO:0042973);;cellular_component:plasma membrane(GO:000…	egu:105046839|-183.3|K19891|GN1_2_3; glucan endo-1,3-beta-glucosidase 1/2/3 [EC:3.2.1.39]|ko00500|Starch and sucrose metabolism;;	4641.GSMUA_Achr4P33420_001|-171.5|ENOG410YEGG|G|glucan endo-1-3-beta-glucosidase	PF00332.16|Glyco_hydro_17|2.4e-67|Glycosyl hydrolases family 17	O65399|E131_ARATH|-157.0|Glucan endo-1,3-beta-glucosidase 1 OS=Arabidopsis thaliana GN=At1g11820 PE=1 SV=3	XP_010923875.1|-182.5|PREDICTED: glucan endo-1,3-beta-glucosidase 1-like [Elaeis guineensis]
c218999_g1	biological_process:phenylpropanoid biosynthetic process(GO:0009699);;molecular_function:oxidoreductase activity(GO:0016491);;molecular_function:cinnamoyl-CoA reductase activity(GO:0016621);;biological_process:negative regulation of circadian rhythm(GO:0042754);;biological_process:oxidation-reduction process(GO:0055114);;biological_process:defense response(GO:0006952);;biological_process:circadian…	-	29760.VIT_18s0122g00620.t01|-114.6|COG0451|M|Nad-dependent epimerase dehydratase	-	Q9SAH9|CCR2_ARATH|-70.3|Cinnamoyl-CoA reductase 2 OS=Arabidopsis thaliana GN=CCR2 PE=1 SV=1	XP_008775468.1|-121.7|PREDICTED: cinnamoyl-CoA reductase 1-like [Phoenix dactylifera]
c139125_g2	-	-	-	-	-	WP_066920316.1|-61.1|GntR family transcriptional regulator [Methylobacterium sp. CCH5-D2]
c276039_g1	-	-	384765.SIAM614_13743|-50.0|COG1386|K|Participates in chromosomal partition during cell division. May act via the formation of a condensin-like complex containing Smc and ScpA that pull DNA away from mid-cell into both cell halves (By similarity)	-	-	WP_066282376.1|-103.0|segregation and condensation protein B [Blastomonas sp. CCH1-A6]
c219492_g3	-	-	4641.GSMUA_Achr8P01250_001|-97.0|COG0546|S|had-superfamily hydrolase, subfamily ia, variant	-	-	XP_020244344.1|-104.2|uncharacterized protein LOC109822536 [Asparagus officinalis]
c132221_g1	-	-	4641.GSMUA_Achr8P16410_001|-154.9|ENOG410YAVI|U|Armadillo beta-catenin repeat family protein	-	-	XP_020587218.1|-175.4|uncharacterized protein LOC110029320 [Phalaenopsis equestris]
c206463_g1	-	mus:103982519|-79.5|K10666|RNF5; E3 ubiquitin-protein ligase RNF5 [EC:2.3.2.27]|ko04141|Protein processing in endoplasmic reticulum;;	4641.GSMUA_Achr4P28110_001|-80.7|ENOG4111IHV|O|Ring finger protein	-	-	XP_020256394.1|-79.8|RING finger protein 5 [Asparagus officinalis]
c246135_g1	-	-	-	-	-	SDP89023.1|-54.0|two-component system, OmpR family, phosphate regulon sensor histidine kinase PhoR [Phyllobacterium sp. OV277]
c101886_g1	-	-	-	-	-	WP_010406487.1|-53.0|phosphoenolpyruvate--protein phosphotransferase [Sphingomonas echinoides]
c217543_g2	-	-	4533.OB10G23320.1|-121.0|COG3491|S|2OGFe(II) oxygenase	-	-	XP_010933627.1|-128.3|PREDICTED: 2-oxoglutarate-Fe(II) type oxidoreductase isoform X1 [Elaeis guineensis]
c216906_g2	-	-	4081.Solyc07g037950.1.1|-153.7|COG1524|S|type i phosphodiesterase nucleotide pyrophosphatase	PF01663.20|Phosphodiest|8.3e-92|Type I phosphodiesterase / nucleotide pyrophosphatase	-	OTG30072.1|-158.1|putative alkaline-phosphatase-like family protein [Helianthus annuus]
c89992_g1	-	-	3694.POPTR_0002s25200.1|-77.4|ENOG410YFIR|S|NA	-	-	XP_010913119.1|-84.5|PREDICTED: uncharacterized protein LOC105038903 [Elaeis guineensis]
c176603_g1	cellular_component:cell wall(GO:0005618);;biological_process:metabolic process(GO:0008152);;molecular_function:hydrolase activity(GO:0016787);;molecular_function:hydrolase activity, acting on glycosyl bonds(GO:0016798);;molecular_function:glucan endo-1,3-beta-D-glucosidase activity(GO:0042973);;biological_process:cell wall organization(GO:0071555);;cellular_component:extracellular region(GO:00055…	-	4641.GSMUA_Achr6P31650_001|-129.4|ENOG410YAGI|G|glucan endo-1,3-beta-glucosidase	PF00332.16|Glyco_hydro_17|1.4e-84|Glycosyl hydrolases family 17	Q9M069|E137_ARATH|-122.3|Glucan endo-1,3-beta-glucosidase 7 OS=Arabidopsis thaliana GN=At4g34480 PE=1 SV=2	XP_007017514.2|-131.6|PREDICTED: glucan endo-1,3-beta-glucosidase 7 [Theobroma cacao]
c142051_g1	biological_process:chlorophyll biosynthetic process(GO:0015995);;biological_process:chlorophyll biosynthetic process(GO:0015995);;molecular_function:oxidoreductase activity(GO:0016491);;molecular_function:divinyl chlorophyllide a 8-vinyl-reductase activity(GO:0033728);;biological_process:oxidation-reduction process(GO:0055114);;cellular_component:chloroplast(GO:0009507);;cellular_component:chloro…	cit:102611623|-154.4|K19073|DVR; divinyl chlorophyllide a 8-vinyl-reductase [EC:1.3.1.75]|ko00860|Porphyrin and chlorophyll metabolism;;	4081.Solyc01g067290.2.1|-153.6|COG0702|GM|epimerase dehydratase	-	J9RYI6|DCVR_CUCSA|-151.6|Divinyl chlorophyllide a 8-vinyl-reductase, chloroplastic OS=Cucumis sativus GN=DVR PE=1 SV=1	XP_006489151.1|-153.6|PREDICTED: divinyl chlorophyllide a 8-vinyl-reductase, chloroplastic [Citrus sinensis]
c222026_g1	molecular_function:anthranilate synthase activity(GO:0004049);;molecular_function:anthranilate synthase activity(GO:0004049);;cellular_component:anthranilate synthase complex(GO:0005950);;biological_process:glutamine metabolic process(GO:0006541);;biological_process:cellular amino acid biosynthetic process(GO:0008652);;biological_process:aromatic amino acid family biosynthetic process(GO:0009073)…	pda:103713292|-93.0|K01658|trpG; anthranilate synthase component II [EC:4.1.3.27]|ko01230|Biosynthesis of amino acids;;ko00400|Phenylalanine, tyrosine and tryptophan biosynthesis;;	39946.BGIOSGA009914-PA|-92.0|COG0512|E|anthranilate synthase	-	Q764B9|ASB2_ORYSJ|-93.2|Anthranilate synthase beta subunit 2, chloroplastic OS=Oryza sativa subsp. japonica GN=ASB2 PE=2 SV=1	XP_020273170.1|-100.4|anthranilate synthase beta subunit 1, chloroplastic-like [Asparagus officinalis]
c233106_g1	-	-	-	-	-	WP_066277976.1|-112.2|glycosyl transferase family 1 [Blastomonas sp. CCH1-A6]
c215512_g1	-	-	4081.Solyc04g076160.1.1|-56.8|ENOG410Y4KS|S|helicase-like protein	-	-	XP_010671914.1|-57.2|PREDICTED: uncharacterized protein LOC104888589 [Beta vulgaris subsp. vulgaris]
c199400_g1	-	-	3847.GLYMA03G28490.1|-80.6|ENOG4111IQH|S|Methyltransferase	-	-	XP_009380624.1|-83.1|PREDICTED: putative methyltransferase DDB_G0268948 isoform X1 [Musa acuminata subsp. malaccensis]
c262090_g1	-	syb:TZ53_20700|-62.1|K01465|URA4, pyrC; dihydroorotase [EC:3.5.2.3]|ko00240|Pyrimidine metabolism;;	-	-	-	WP_066284940.1|-72.9|dihydroorotase [Blastomonas sp. CCH1-A6]
c215512_g2	-	-	4555.Si019133m|-73.9|COG0507|L|exodeoxyribonuclease v alpha	-	-	XP_020081827.1|-79.8|uncharacterized protein LOC109705509 [Ananas comosus]
c221781_g5	-	-	-	-	-	XP_013673949.1|-49.8|PREDICTED: uncharacterized protein LOC106378351 [Brassica napus]
c226736_g2	-	-	4641.GSMUA_Achr8P28940_001|-130.4|ENOG410YBS0|S|LRR	-	Q9SRR1|FBL12_ARATH|-95.8|F-box/LRR-repeat protein 12 OS=Arabidopsis thaliana GN=FBL12 PE=2 SV=1	XP_020246464.1|-157.4|F-box/LRR-repeat protein 12 [Asparagus officinalis]
c88680_g1	molecular_function:DNA binding(GO:0003677);;molecular_function:double-stranded telomeric DNA binding(GO:0003691);;cellular_component:nucleus(GO:0005634);;cellular_component:nucleus(GO:0005634);;cellular_component:nucleus(GO:0005634);;cellular_component:chromosome(GO:0005694);;cellular_component:chromosome(GO:0005694);;cellular_component:nucleolus(GO:0005730);;cellular_component:nucleolus(GO:00057…	-	4081.Solyc11g044320.1.1|-77.1|ENOG4111SQS|K|single myb histone	-	C0HIA3|SMH6_MAIZE|-72.2|Single myb histone 6 OS=Zea mays GN=SMH6 PE=2 SV=1	XP_020269771.1|-82.1|single myb histone 6-like [Asparagus officinalis]
c220139_g1	molecular_function:transferase activity(GO:0016740);;molecular_function:transferase activity, transferring acyl groups(GO:0016746)	-	29760.VIT_07s0005g02670.t01|-123.2|ENOG410YE2Y|S|3-N-debenzoyl-2-deoxytaxol	PF02458.13|Transferase|2e-71|Transferase family	Q9LGQ6|AT9_ORYSJ|-92.6|Acyl transferase 9 OS=Oryza sativa subsp. japonica GN=AT9 PE=2 SV=1	XP_020273999.1|-164.2|acyl transferase 4-like [Asparagus officinalis]
c169640_g1	biological_process:ion transport(GO:0006811);;biological_process:proton transport(GO:0015992);;cellular_component:membrane(GO:0016020);;cellular_component:vacuole(GO:0005773);;cellular_component:vacuolar membrane(GO:0005774);;biological_process:transport(GO:0006810)	thj:104806428|-95.2|K02150|ATPeV1E, ATP6E; V-type H+-transporting ATPase subunit E|ko04145|Phagosome;;ko00190|Oxidative phosphorylation;;	59689.fgenesh2_kg.6__3087__AT4G11150.1|-93.3|COG1390|C|Produces ATP from ADP in the presence of a proton gradient across the membrane (By similarity)	PF01991.16|vATP-synt_E|5.1e-67|ATP synthase (E/31 kDa) subunit	Q39258|VATE1_ARATH|-94.3|V-type proton ATPase subunit E1 OS=Arabidopsis thaliana GN=VHA-E1 PE=1 SV=2	XP_020267299.1|-97.6|V-type proton ATPase subunit E-like [Asparagus officinalis]
c35649_g1	-	-	-	-	-	WP_048463843.1|-96.5|ATP-dependent helicase [Methylobacterium aquaticum]
c231219_g1	-	-	-	-	-	XP_020258784.1|-60.1|uncharacterized protein LOC109835211 [Asparagus officinalis]
c230912_g2	cellular_component:plastid(GO:0009536);;molecular_function:RNA binding(GO:0003723);;cellular_component:chloroplast(GO:0009507);;cellular_component:chloroplast(GO:0009507)	-	3694.POPTR_0014s17530.1|-113.0|ENOG410YFAT|S|CRS1_YhbY	-	Q67XL4|Y3544_ARATH|-103.6|Uncharacterized CRM domain-containing protein At3g25440, chloroplastic OS=Arabidopsis thaliana GN=At3g25440 PE=2 SV=1	XP_011009601.1|-115.9|PREDICTED: uncharacterized CRM domain-containing protein At3g25440, chloroplastic isoform X1 [Populus euphratica]
c276794_g1	-	-	-	-	-	WP_060977337.1|-58.3|MULTISPECIES: DUF736 domain-containing protein [Proteobacteria]
c103972_g1	-	-	-	-	-	WP_066522050.1|-55.5|Tn3 family transposase [Sphingobium cloacae]
c197064_g1	-	-	-	-	-	XP_020244282.1|-56.2|U1 small nuclear ribonucleoprotein C-like [Asparagus officinalis]
c219773_g3	-	-	4081.Solyc11g071840.1.1|-93.4|ENOG410YEKM|S|IQ calmodulin-binding motif domain containing protein, expressed	-	-	XP_020272999.1|-119.1|protein IQ-DOMAIN 1-like [Asparagus officinalis]
c321210_g1	cellular_component:nucleus(GO:0005634);;cellular_component:nucleus(GO:0005634);;molecular_function:metal ion binding(GO:0046872)	-	4577.GRMZM2G129311_P01|-278.5|ENOG410ZJVC|S|transposon protein	-	Q9SZL8|FRS5_ARATH|-113.7|Protein FAR1-RELATED SEQUENCE 5 OS=Arabidopsis thaliana GN=FRS5 PE=2 SV=1	XP_020274753.1|-10000.0|protein FAR1-RELATED SEQUENCE 5-like [Asparagus officinalis]
c206744_g2	-	-	4577.GRMZM2G088014_P01|-97.6|ENOG4111XKV|S|NA	-	-	XP_017702102.1|-157.1|PREDICTED: uncharacterized protein LOC103722881 [Phoenix dactylifera]
c219773_g5	cellular_component:membrane(GO:0016020);;cellular_component:integral component of membrane(GO:0016021);;molecular_function:transferase activity(GO:0016740);;biological_process:methylation(GO:0032259);;cellular_component:Golgi membrane(GO:0000139);;cellular_component:Golgi apparatus(GO:0005794);;molecular_function:methyltransferase activity(GO:0008168)	-	4641.GSMUA_Achr8P30140_001|-129.7|ENOG410Y2C5|S|Methyltransferase	PF03141.14|Methyltransf_29|1e-105|Putative S-adenosyl-L-methionine-dependent methyltransferase	Q8L7V3|PMTQ_ARATH|-122.5|Probable methyltransferase PMT26 OS=Arabidopsis thaliana GN=At5g64030 PE=2 SV=1	XP_020253128.1|-135.2|probable methyltransferase PMT26 [Asparagus officinalis]
c172318_g1	molecular_function:GTP binding(GO:0005525);;cellular_component:Golgi apparatus(GO:0005794);;cellular_component:Golgi apparatus(GO:0005794);;biological_process:transport(GO:0006810);;biological_process:ER to Golgi vesicle-mediated transport(GO:0006888);;biological_process:protein transport(GO:0015031);;cellular_component:membrane(GO:0016020);;biological_process:vesicle-mediated transport(GO:001619…	-	29760.VIT_12s0035g01150.t01|-95.8|ENOG410XQN5|S|member RAS oncogene family	PF00071.20|Ras|1.2e-64|Ras family	Q9ZRE2|RABD1_ARATH|-90.8|Ras-related protein RABD1 OS=Arabidopsis thaliana GN=RABD1 PE=1 SV=1	XP_020261977.1|-98.1|ras-related protein RABD1 [Asparagus officinalis]
c229541_g1	-	-	4641.GSMUA_Achr7P10880_001|-164.4|COG0037|D|Ligates lysine onto the cytidine present at position 34 of the AUA codon-specific tRNA(Ile) that contains the anticodon CAU, in an ATP-dependent manner. Cytidine is converted to lysidine, thus changing the amino acid specificity of the tRNA from methionine to isoleucine (By similarity)	-	-	XP_008795051.1|-192.4|PREDICTED: uncharacterized protein LOC103710905 [Phoenix dactylifera]
c149792_g1	-	pda:103722886|-52.3|K16189|PIF4; phytochrome-interacting factor 4|ko04075|Plant hormone signal transduction;;	-	-	-	ONK74413.1|-56.6|uncharacterized protein A4U43_C03F5960 [Asparagus officinalis]
c195115_g1	-	-	-	-	-	XP_020253441.1|-133.3|plant UBX domain-containing protein 11 isoform X2 [Asparagus officinalis]
c43860_g1	cellular_component:membrane(GO:0016020);;cellular_component:membrane(GO:0016020);;cellular_component:integral component of membrane(GO:0016021)	-	29760.VIT_19s0014g05040.t01|-91.1|ENOG410YCRQ|S|Formin-like protein	-	Q0D5P3|FH11_ORYSJ|-85.9|Formin-like protein 11 OS=Oryza sativa subsp. japonica GN=FH11 PE=2 SV=1	XP_020276265.1|-107.3|formin-like protein 5 isoform X2 [Asparagus officinalis]
c44249_g1	-	-	-	-	-	WP_031255710.1|-48.3|flagellar M-ring protein FliF [Curvibacter lanceolatus]
c189464_g1	-	-	-	-	-	WP_066921148.1|-88.0|YgiQ family radical SAM protein [Methylobacterium sp. CCH5-D2]
c223088_g1	-	-	3694.POPTR_0001s11820.1|-130.5|ENOG410YDW0|S|serine esterase family protein	PF05057.12|DUF676|1.8e-68|Putative serine esterase (DUF676)	-	XP_020244334.1|-155.7|putative lipase YOR059C [Asparagus officinalis]
c216430_g1	-	-	-	-	-	XP_019152420.1|-65.1|PREDICTED: uncharacterized protein LOC109149213 [Ipomoea nil]
c199907_g1	biological_process:chitin catabolic process(GO:0006032);;biological_process:metabolic process(GO:0008152);;molecular_function:hydrolase activity(GO:0016787);;molecular_function:hydrolase activity, acting on glycosyl bonds(GO:0016798);;biological_process:polysaccharide catabolic process(GO:0000272);;molecular_function:chitinase activity(GO:0004568);;biological_process:carbohydrate metabolic proces…	cic:CICLE_v10024434mg|-115.5|K01183|E3.2.1.14; chitinase [EC:3.2.1.14]|ko00520|Amino sugar and nucleotide sugar metabolism;;	3847.GLYMA18G15310.2|-115.3|ENOG4111GPA|G|chitinase	-	P51614|CHIT3_VITVI|-110.6|Acidic endochitinase OS=Vitis vinifera GN=CHIT3 PE=2 SV=1	AFV30205.1|-116.0|putative class III chitinase [Elaeis guineensis]
c228291_g1	-	-	15368.BRADI5G14270.1|-53.4|ENOG4111UER|S|mitochondrial pyruvate carrier 2	-	-	XP_020676604.1|-51.5|mitochondrial pyruvate carrier 4 [Dendrobium catenatum]
c216574_g2	-	egu:105035704|-132.3|K16329|psuG; pseudouridylate synthase [EC:4.2.1.70]|ko00240|Pyrimidine metabolism;;	3694.POPTR_0001s26090.1|-129.7|COG2313|Q|hydrolase activity, acting on glycosyl bonds	PF04227.10|Indigoidine_A|1.5e-133|Indigoidine synthase A like protein	-	XP_010909662.1|-131.5|PREDICTED: uncharacterized protein LOC105035704 isoform X1 [Elaeis guineensis]
c100999_g1	cellular_component:membrane(GO:0016020);;cellular_component:membrane(GO:0016020);;cellular_component:integral component of membrane(GO:0016021)	-	4641.GSMUA_Achr8P02120_001|-169.2|COG0666|S|Ankyrin Repeat	-	Q6AWW5|Y5262_ARATH|-122.2|Ankyrin repeat-containing protein At5g02620 OS=Arabidopsis thaliana GN=At5g02620 PE=1 SV=1	XP_020274813.1|-183.0|ankyrin repeat-containing protein At5g02620-like isoform X1 [Asparagus officinalis]
c227510_g1	molecular_function:ATP binding(GO:0005524);;cellular_component:chloroplast(GO:0009507);;cellular_component:chloroplast(GO:0009507);;cellular_component:plastid(GO:0009536);;molecular_function:hydrolase activity(GO:0016787);;molecular_function:nucleotide binding(GO:0000166);;molecular_function:RNA binding(GO:0003723);;molecular_function:helicase activity(GO:0004386)	-	4641.GSMUA_Achr6P17860_001|-10000.0|COG1643|L|helicase	-	F4I9Q5|DEXH7_ARATH|-10000.0|DExH-box ATP-dependent RNA helicase DExH7, chloroplastic OS=Arabidopsis thaliana GN=At1g58060 PE=2 SV=1	XP_008781510.1|-10000.0|PREDICTED: DExH-box ATP-dependent RNA helicase DExH7, chloroplastic isoform X2 [Phoenix dactylifera]
c227736_g1	biological_process:protein ubiquitination(GO:0016567)	-	39946.BGIOSGA027705-PA|-189.8|ENOG41105BC|S|NPH3 family	PF03000.12|NPH3|4.4e-83|NPH3 family	Q9S9Q9|Y1044_ARATH|-179.8|BTB/POZ domain-containing protein At1g30440 OS=Arabidopsis thaliana GN=At1g30440 PE=1 SV=2	XP_009419002.1|-206.4|PREDICTED: BTB/POZ domain-containing protein At1g30440-like [Musa acuminata subsp. malaccensis]
c100855_g1	cellular_component:membrane(GO:0016020);;cellular_component:integral component of membrane(GO:0016021);;biological_process:viral replication complex formation and maintenance(GO:0046786);;cellular_component:vacuole(GO:0005773);;cellular_component:vacuolar membrane(GO:0005774);;cellular_component:plant-type vacuole membrane(GO:0009705)	-	4641.GSMUA_Achr9P23840_001|-132.6|ENOG41110A4|S|tobamovirus multiplication	PF06454.9|DUF1084|3.9e-140|Protein of unknown function (DUF1084)	Q402F3|TOM3_TOBAC|-132.4|Tobamovirus multiplication protein 3 OS=Nicotiana tabacum GN=TOM3 PE=1 SV=1	XP_020095668.1|-135.2|tobamovirus multiplication protein 3-like [Ananas comosus]
c158841_g1	-	-	-	-	-	XP_019709345.1|-60.9|PREDICTED: LOW QUALITY PROTEIN: receptor-like serine/threonine-protein kinase At2g45590 [Elaeis guineensis]
c220894_g1	cellular_component:nucleus(GO:0005634);;molecular_function:metal ion binding(GO:0046872);;molecular_function:protein binding(GO:0005515);;molecular_function:protein binding(GO:0005515);;cellular_component:nucleus(GO:0005634)	-	4513.MLOC_74275.2|-155.0|ENOG410ZKIB|S|OBERON 3-like	-	Q84TI3|OBE4_ARATH|-133.6|Protein OBERON 4 OS=Arabidopsis thaliana GN=OBE4 PE=1 SV=2	XP_010906124.1|-221.7|PREDICTED: protein OBERON 4-like [Elaeis guineensis]
c267408_g1	-	-	4555.Si034900m|-224.5|ENOG410XRBH|T|SRSF protein kinase	-	-	XP_004981785.1|-222.4|PREDICTED: SRSF protein kinase 1-like [Setaria italica]
c227654_g3	-	-	3694.POPTR_0013s10760.1|-58.2|COG2801|L|Retrotransposon protein	-	-	XP_018820964.1|-55.8|PREDICTED: uncharacterized protein LOC108991242 [Juglans regia]
c231974_g1	-	egu:105053627|-107.0|K14572|MDN1, REA1; midasin|ko03008|Ribosome biogenesis in eukaryotes;;	4641.GSMUA_Achr1P01230_001|-122.1|COG5271|S|Nuclear chaperone required for maturation and nuclear export of pre-60S ribosome subunits (By similarity)	-	-	XP_020262192.1|-145.4|midasin [Asparagus officinalis]
c203545_g1	molecular_function:metal ion binding(GO:0046872);;cellular_component:mitochondrion(GO:0005739);;cellular_component:mitochondrion(GO:0005739);;molecular_function:hydrolase activity(GO:0016787)	-	4641.GSMUA_Achr4P15070_001|-81.6|COG0494|L|Nudix hydrolase	-	Q8GYB1|NUD15_ARATH|-74.4|Nudix hydrolase 15, mitochondrial OS=Arabidopsis thaliana GN=NUDT15 PE=1 SV=2	XP_002276381.1|-80.1|PREDICTED: nudix hydrolase 15, mitochondrial [Vitis vinifera]
c214625_g1	biological_process:vesicle-mediated transport(GO:0016192);;cellular_component:endosome(GO:0005768);;biological_process:endosome transport via multivesicular body sorting pathway(GO:0032509);;cellular_component:endosome(GO:0005768);;cellular_component:cytosol(GO:0005829);;cellular_component:plasma membrane(GO:0005886);;cellular_component:plasma membrane(GO:0005886);;biological_process:transport(GO…	egu:105034005|-10000.0|K18443|GBF1; golgi-specific brefeldin A-resistance guanine nucleotide exchange factor 1|ko04144|Endocytosis;;	4533.OB03G36180.1|-10000.0|COG5307|S|and Sec7 domain	PF01369.18|Sec7|1.4e-62|Sec7 domain	Q42510|GNOM_ARATH|-10000.0|ARF guanine-nucleotide exchange factor GNOM OS=Arabidopsis thaliana GN=GN PE=1 SV=1	XP_010907327.1|-10000.0|PREDICTED: ARF guanine-nucleotide exchange factor GNOM-like [Elaeis guineensis]
c152100_g2	-	-	-	-	-	WP_082737565.1|-96.4|MULTISPECIES: chromate transporter [Blastomonas]
c227654_g5	-	-	3847.GLYMA06G43690.2|-121.3|ENOG410Z7Z7|S|Pentatricopeptide repeat-containing protein	-	Q0WN01|PP286_ARATH|-91.4|Pentatricopeptide repeat-containing protein At3g58590 OS=Arabidopsis thaliana GN=At3g58590 PE=2 SV=2	ONK68912.1|-209.2|uncharacterized protein A4U43_C05F17330 [Asparagus officinalis]
c225705_g1	cellular_component:membrane(GO:0016020);;cellular_component:membrane(GO:0016020);;cellular_component:extracellular region(GO:0005576);;cellular_component:cell wall(GO:0005618);;cellular_component:cell wall(GO:0005618)	-	3711.Bra005917.1-P|-95.2|ENOG410YB0Y|S|polygalacturonase inhibiting protein	-	Q9M5J8|PGIP2_ARATH|-91.7|Polygalacturonase inhibitor 2 OS=Arabidopsis thaliana GN=PGIP2 PE=2 SV=2	XP_010943538.2|-97.4|PREDICTED: polygalacturonase inhibitor-like [Elaeis guineensis]
c129388_g1	-	-	-	-	-	WP_066209066.1|-104.9|hybrid sensor histidine kinase/response regulator [Blastomonas sp. CCH10-E1]
c152100_g3	-	syb:TZ53_23400|-67.4|K04564|SOD2; superoxide dismutase, Fe-Mn family [EC:1.15.1.1]|ko04146|Peroxisome;;	-	-	-	WP_066214118.1|-96.0|MULTISPECIES: superoxide dismutase [Blastomonas]
c209137_g1	biological_process:regulation of long-day photoperiodism, flowering(GO:0048586);;molecular_function:ATP binding(GO:0005524);;cellular_component:nucleus(GO:0005634);;cellular_component:nucleus(GO:0005634);;cellular_component:nucleus(GO:0005634);;cellular_component:cytoplasm(GO:0005737);;cellular_component:cytoplasm(GO:0005737);;biological_process:gibberellic acid mediated signaling pathway(GO:0009…	-	29760.VIT_04s0008g00160.t01|-308.4|ENOG410XPGP|T|Casein Kinase	-	Q852L0|HD16N_ORYSJ|-273.3|Casein kinase 1-like protein HD16 OS=Oryza sativa subsp. japonica GN=HD16 PE=1 SV=1	XP_020264878.1|-10000.0|casein kinase 1-like protein HD16 isoform X1 [Asparagus officinalis]
c219910_g1	cellular_component:chloroplast(GO:0009507);;cellular_component:plastid(GO:0009536);;molecular_function:metal ion binding(GO:0046872);;biological_process:chloroplast RNA modification(GO:1900865);;molecular_function:RNA binding(GO:0003723);;biological_process:mRNA processing(GO:0006397);;cellular_component:chloroplast(GO:0009507)	-	29760.VIT_05s0049g02300.t01|-103.8|ENOG410Z7Z7|S|Pentatricopeptide repeat-containing protein	-	Q9SN39|PP320_ARATH|-63.4|Pentatricopeptide repeat-containing protein DOT4, chloroplastic OS=Arabidopsis thaliana GN=DOT4 PE=2 SV=1	XP_020259952.1|-176.6|pentatricopeptide repeat-containing protein At3g57430, chloroplastic-like [Asparagus officinalis]
c121703_g1	-	-	-	-	-	WP_066113912.1|-133.2|MULTISPECIES: TonB-dependent siderophore receptor [Sphingomonadales]
c104972_g1	-	-	4641.GSMUA_Achr1P10150_001|-51.0|COG0484|O|ATP binding to DnaK triggers the release of the substrate protein, thus completing the reaction cycle. Several rounds of ATP-dependent interactions between DnaJ, DnaK and GrpE are required for fully efficient folding. Also involved, together with DnaK and GrpE, in the DNA replication of plasmids through activation of initiation proteins (By similarity)	-	-	XP_009396818.1|-50.3|PREDICTED: chaperone protein dnaJ 8, chloroplastic-like [Musa acuminata subsp. malaccensis]
c209137_g2	biological_process:regulation of long-day photoperiodism, flowering(GO:0048586);;molecular_function:ATP binding(GO:0005524);;cellular_component:nucleus(GO:0005634);;cellular_component:nucleus(GO:0005634);;cellular_component:nucleus(GO:0005634);;cellular_component:cytoplasm(GO:0005737);;cellular_component:cytoplasm(GO:0005737);;biological_process:gibberellic acid mediated signaling pathway(GO:0009…	-	4641.GSMUA_Achr8P20360_001|-118.7|ENOG410XPGP|T|Casein Kinase	-	Q852L0|HD16N_ORYSJ|-115.8|Casein kinase 1-like protein HD16 OS=Oryza sativa subsp. japonica GN=HD16 PE=1 SV=1	XP_020275945.1|-119.7|casein kinase 1-like protein HD16 [Asparagus officinalis]
c213313_g1	-	-	-	-	-	XP_020248108.1|-50.1|ethylene-responsive transcription factor 1B-like [Asparagus officinalis]
c151076_g1	cellular_component:ribosome(GO:0005840);;cellular_component:intracellular ribonucleoprotein complex(GO:0030529)	mus:104000241|-64.5|K02865|RP-L10Ae, RPL10A; large subunit ribosomal protein L10Ae|ko03010|Ribosome;;	3847.GLYMA19G37980.1|-64.6|COG0081|J|Binds directly to 23S rRNA. The L1 stalk is quite mobile in the ribosome, and is involved in E site tRNA release (By similarity)	-	Q8VZB9|R10A1_ARATH|-64.2|60S ribosomal protein L10a-1 OS=Arabidopsis thaliana GN=RPL10AA PE=1 SV=1	ONK67540.1|-64.1|uncharacterized protein A4U43_C05F1100 [Asparagus officinalis]
c197345_g1	cellular_component:endoplasmic reticulum membrane(GO:0005789);;molecular_function:protein transporter activity(GO:0008565);;cellular_component:plasmodesma(GO:0009506);;cellular_component:plasmodesmatal endoplasmic reticulum(GO:0009511);;biological_process:flower development(GO:0009908);;biological_process:positive regulation of flower development(GO:0009911);;biological_process:vegetative to repr…	-	15368.BRADI5G26730.1|-10000.0|ENOG410XRQN|S|Multiple C2 and transmembrane domain-containing protein	PF08372.8|PRT_C|2.3e-82|Plant phosphoribosyltransferase C-terminal	Q9FL59|FTIP1_ARATH|-306.3|FT-interacting protein 1 OS=Arabidopsis thaliana GN=FTIP1 PE=1 SV=1	XP_008806876.1|-10000.0|PREDICTED: FT-interacting protein 1-like [Phoenix dactylifera]
c333496_g1	-	-	-	-	-	WP_039261537.1|-58.0|MULTISPECIES: hybrid-cluster NAD(P)-dependent oxidoreductase [Enterobacter]
c190441_g1	-	pda:103713679|-70.2|K14411|MSI; RNA-binding protein Musashi|ko03015|mRNA surveillance pathway;;	-	-	-	XP_020692938.1|-71.9|RNA-binding protein 1-like [Dendrobium catenatum]
c213457_g2	biological_process:amino acid transport(GO:0006865);;molecular_function:symporter activity(GO:0015293);;cellular_component:membrane(GO:0016020);;cellular_component:integral component of membrane(GO:0016021);;cellular_component:plasma membrane(GO:0005886);;cellular_component:plasma membrane(GO:0005886);;biological_process:transport(GO:0006810)	-	4641.GSMUA_Achr3P10920_001|-122.8|COG0814|E|amino acid transport	PF01490.16|Aa_trans|2e-72|Transmembrane amino acid transporter protein	Q9FF99|AAP7_ARATH|-100.8|Probable amino acid permease 7 OS=Arabidopsis thaliana GN=AAP7 PE=2 SV=1	XP_020110661.1|-122.7|probable amino acid permease 7 isoform X1 [Ananas comosus]
c225030_g1	cellular_component:plastid(GO:0009536);;biological_process:vitamin E biosynthetic process(GO:0010189);;molecular_function:transferase activity(GO:0016740);;biological_process:methylation(GO:0032259);;molecular_function:tocopherol O-methyltransferase activity(GO:0050342);;molecular_function:methyltransferase activity(GO:0008168);;cellular_component:chloroplast(GO:0009507);;cellular_component:chlor…	egu:105033221|-127.9|K05928|E2.1.1.95; tocopherol O-methyltransferase [EC:2.1.1.95]|ko00130|Ubiquinone and other terpenoid-quinone biosynthesis;;	4641.GSMUA_Achr1P27850_001|-129.1|ENOG410XP5G|S|Methyltransferase	-	Q6ZIK0|GTOMC_ORYSJ|-129.5|Probable tocopherol O-methyltransferase, chloroplastic OS=Oryza sativa subsp. japonica GN=VTE4 PE=2 SV=1	XP_010906230.1|-134.7|PREDICTED: probable tocopherol O-methyltransferase, chloroplastic isoform X2 [Elaeis guineensis]
c144788_g1	cellular_component:cytoplasm(GO:0005737);;molecular_function:isomerase activity(GO:0016853);;molecular_function:peptidyl-prolyl cis-trans isomerase activity(GO:0003755);;molecular_function:peptidyl-prolyl cis-trans isomerase activity(GO:0003755);;cellular_component:cytoplasm(GO:0005737)	-	3847.GLYMA12G02790.2|-85.3|COG0652|O|peptidyl-prolyl cis-trans isomerase activity	-	Q38900|CP19A_ARATH|-85.3|Peptidyl-prolyl cis-trans isomerase CYP19-1 OS=Arabidopsis thaliana GN=CYP19-1 PE=1 SV=1	XP_002510543.1|-85.5|PREDICTED: peptidyl-prolyl cis-trans isomerase [Ricinus communis]
c219910_g5	cellular_component:chloroplast(GO:0009507);;cellular_component:plastid(GO:0009536);;molecular_function:rRNA binding(GO:0019843);;cellular_component:intracellular ribonucleoprotein complex(GO:0030529);;molecular_function:RNA binding(GO:0003723);;cellular_component:ribosome(GO:0005840);;cellular_component:chloroplast(GO:0009507)	pda:8890548|-61.0|K02874|RP-L14, MRPL14, rplN; large subunit ribosomal protein L14|ko03010|Ribosome;;	4081.Solyc01g007590.2.1|-59.2|COG0093|J|Binds to 23S rRNA. Forms part of two intersubunit bridges in the 70S ribosome (By similarity)	-	A6MMY1|RK14_ILLOL|-61.8|50S ribosomal protein L14, chloroplastic OS=Illicium oligandrum GN=rpl14 PE=3 SV=1	BAX84126.1|-61.8|50S ribosomal protein L14 (chloroplast) [Goodyera schlechtendaliana]
c39821_g1	cellular_component:mitochondrial inner membrane(GO:0005743);;cellular_component:mitochondrial inner membrane(GO:0005743);;biological_process:transport(GO:0006810);;biological_process:ion transport(GO:0006811);;cellular_component:chloroplast(GO:0009507);;cellular_component:plastid outer membrane(GO:0009527);;cellular_component:plastid(GO:0009536);;cellular_component:chloroplast outer membrane(GO:0…	-	4641.GSMUA_Achr9P12480_001|-63.6|COG5596|O|mitochondrial import inner membrane translocase, subunit	-	O48528|OP163_ARATH|-55.3|Outer envelope pore protein 16-3, chloroplastic/mitochondrial OS=Arabidopsis thaliana GN=OEP163 PE=1 SV=1	XP_020268071.1|-68.6|outer envelope pore protein 16-3, chloroplastic/mitochondrial-like [Asparagus officinalis]
c218886_g1	cellular_component:mitochondrial inner membrane(GO:0005743);;cellular_component:mitochondrial inner membrane(GO:0005743);;cellular_component:membrane(GO:0016020);;cellular_component:integral component of membrane(GO:0016021);;cellular_component:mitochondrion(GO:0005739);;cellular_component:mitochondrial outer membrane(GO:0005741);;cellular_component:mitochondrial outer membrane(GO:0005741)	-	4577.GRMZM2G005209_P01|-101.5|ENOG410XY7W|O|Metaxin 2	-	O64471|MTX_ARATH|-82.7|Mitochondrial outer membrane import complex protein METAXIN OS=Arabidopsis thaliana GN=MTX1 PE=1 SV=1	XP_020250038.1|-121.5|mitochondrial outer membrane import complex protein METAXIN-like [Asparagus officinalis]
c139156_g1	-	-	4641.GSMUA_Achr10P24130_001|-55.0|ENOG410XQ8V|S|synthase	-	-	ONK59562.1|-56.5|uncharacterized protein A4U43_C08F7740 [Asparagus officinalis]
c229966_g1	cellular_component:nucleus(GO:0005634);;cellular_component:nucleus(GO:0005634);;biological_process:DNA repair(GO:0006281);;biological_process:cellular response to DNA damage stimulus(GO:0006974);;molecular_function:lyase activity(GO:0016829);;molecular_function:nucleotide binding(GO:0000166);;molecular_function:DNA binding(GO:0003677);;molecular_function:deoxyribodipyrimidine photo-lyase activity…	-	3702.AT1G12370.2|-185.5|COG0415|L|deoxyribo-dipyrimidine photolyase	-	Q9SB00|PHR_ARATH|-186.7|Deoxyribodipyrimidine photo-lyase OS=Arabidopsis thaliana GN=PHR1 PE=2 SV=1	OVA07673.1|-193.7|DNA photolyase [Macleaya cordata]
c229822_g1	biological_process:DNA repair(GO:0006281);;biological_process:cellular response to DNA damage stimulus(GO:0006974)	sot:102584255|-212.3|K10838|XPC; xeroderma pigmentosum group C-complementing protein|ko03420|Nucleotide excision repair;;	4113.PGSC0003DMT400040474|-213.5|COG5535|L|nucleotide-excision repair	-	Q8W489|RAD4_ARATH|-194.7|DNA repair protein RAD4 OS=Arabidopsis thaliana GN=RAD4 PE=1 SV=1	XP_020269304.1|-264.7|DNA repair protein RAD4 isoform X1 [Asparagus officinalis]
c219910_g6	cellular_component:plastid(GO:0009536);;cellular_component:intracellular ribonucleoprotein complex(GO:0030529);;cellular_component:ribosome(GO:0005840);;cellular_component:chloroplast(GO:0009507);;cellular_component:chloroplast(GO:0009507)	egu:12079425|-66.5|K02878|RP-L16, MRPL16, rplP; large subunit ribosomal protein L16|ko03010|Ribosome;;	39947.LOC_Os05g22724.1|-64.1|COG0197|J|Binds 23S rRNA and is also seen to make contacts with the A and possibly P site tRNAs (By similarity)	-	Q7YJU1|RK16_CALFG|-69.2|50S ribosomal protein L16, chloroplastic OS=Calycanthus floridus var. glaucus GN=rpl16 PE=3 SV=1	AHC94705.1|-67.4|ribosomal protein L16 (chloroplast) [Allium cepa]
c131615_g1	-	-	29760.VIT_05s0049g01940.t01|-110.1|ENOG410YV57|S|GTPase activating protein (SH3 domain) binding protein	-	-	XP_008796383.1|-126.8|PREDICTED: putative G3BP-like protein [Phoenix dactylifera]
c212145_g1	cellular_component:integral component of membrane(GO:0016021);;cellular_component:peroxisome(GO:0005777);;cellular_component:peroxisomal membrane(GO:0005778);;cellular_component:membrane(GO:0016020)	aly:ARALYDRAFT_658854|-74.9|K13347|PXMP2, PMP22; peroxisomal membrane protein 2|ko04146|Peroxisome;;	59689.Al_scaffold_0007_2909|-76.0|ENOG4111SYH|S|Peroxisomal membrane protein	-	Q9ZS51|PMP22_ARATH|-55.9|Peroxisomal membrane protein PMP22 OS=Arabidopsis thaliana GN=PMP22 PE=1 SV=1	XP_020275856.1|-75.4|peroxisomal membrane protein PMP22 [Asparagus officinalis]
c132252_g1	molecular_function:ATP binding(GO:0005524);;molecular_function:hydrolase activity(GO:0016787);;molecular_function:nucleotide binding(GO:0000166);;molecular_function:RNA binding(GO:0003723);;molecular_function:helicase activity(GO:0004386)	-	3694.POPTR_0008s07310.1|-224.8|ENOG410XNT7|L|atp-dependent rna helicase	-	Q9FLB0|RH18_ARATH|-213.1|DEAD-box ATP-dependent RNA helicase 18 OS=Arabidopsis thaliana GN=RH18 PE=2 SV=1	XP_010937935.1|-235.9|PREDICTED: DEAD-box ATP-dependent RNA helicase 18 [Elaeis guineensis]
c250935_g1	-	-	-	-	-	SDP00491.1|-53.8|Predicted 5' DNA nuclease, flap endonuclease-1-like, helix-3-turn-helix (H3TH) domain [Phyllobacterium sp. OV277]
c229966_g3	-	-	39947.LOC_Os09g26970.1|-93.1|COG2124|Q|Cytochrome p450	PF07727.12|RVT_2|2.6e-94|Reverse transcriptase (RNA-dependent DNA polymerase)	-	CAN83392.1|-111.0|hypothetical protein VITISV_041406 [Vitis vinifera]
c205857_g1	-	-	4641.GSMUA_Achr3P08790_001|-64.7|ENOG4111JJV|K|Activator of basal transcription	-	-	XP_020268110.1|-69.1|pre-rRNA-processing protein ESF2 [Asparagus officinalis]
c27573_g1	cellular_component:integral component of membrane(GO:0016021);;molecular_function:hydrolase activity(GO:0016787);;cellular_component:endosome(GO:0005768);;cellular_component:endosome membrane(GO:0010008);;cellular_component:membrane(GO:0016020)	-	4641.GSMUA_Achr4P12000_001|-234.2|ENOG410ZP52|U|signal peptide	PF04258.11|Peptidase_A22B|6.1e-83|Signal peptide peptidase	Q0DWA9|SIPL4_ORYSJ|-221.3|Signal peptide peptidase-like 4 OS=Oryza sativa subsp. japonica GN=SPPL4 PE=2 SV=1	XP_020249788.1|-245.5|signal peptide peptidase-like 4 [Asparagus officinalis]
c229822_g4	molecular_function:translation elongation factor activity(GO:0003746);;biological_process:translation(GO:0006412);;biological_process:translational elongation(GO:0006414)	-	29760.VIT_17s0000g01540.t01|-92.6|COG2092|J|Promotes the exchange of GDP for GTP in EF-1-alpha GDP, thus allowing the regeneration of EF-1-alpha GTP that could then be used to form the ternary complex EF-1-alpha GTP AAtRNA (By similarity)	-	Q40682|EF1D2_ORYSJ|-91.8|Elongation factor 1-delta 2 OS=Oryza sativa subsp. japonica GN=Os03g0406200 PE=2 SV=3	XP_020240797.1|-97.0|elongation factor 1-delta-like [Asparagus officinalis]
c217574_g1	cellular_component:membrane(GO:0016020);;cellular_component:integral component of membrane(GO:0016021);;biological_process:viral process(GO:0016032);;cellular_component:protein storage vacuole membrane(GO:0032586);;cellular_component:vacuole(GO:0005773);;cellular_component:endoplasmic reticulum(GO:0005783);;cellular_component:endoplasmic reticulum membrane(GO:0005789)	-	4641.GSMUA_Achr5P20880_001|-92.3|COG5066|U|Central component in molecular interactions underlying sperm crawling. Forms an extensive filament system that extends from sperm villipoda, along the leading edge of the pseudopod (By similarity)	-	Q8VZ95|VAP11_ARATH|-74.5|Vesicle-associated protein 1-1 OS=Arabidopsis thaliana GN=PVA11 PE=1 SV=1	XP_020277396.1|-103.4|vesicle-associated protein 1-1-like [Asparagus officinalis]
c126127_g1	biological_process:ion transport(GO:0006811);;biological_process:potassium ion transport(GO:0006813);;cellular_component:membrane(GO:0016020);;cellular_component:integral component of membrane(GO:0016021);;cellular_component:plasma membrane(GO:0005886);;cellular_component:plasma membrane(GO:0005886);;biological_process:transport(GO:0006810)	-	59689.scaffold_200601.1|-10000.0|COG3158|P|Transport of potassium into the cell (By similarity)	PF02705.14|K_trans|2e-190|K+ potassium transporter	O80739|POT12_ARATH|-10000.0|Putative potassium transporter 12 OS=Arabidopsis thaliana GN=POT12 PE=1 SV=2	XP_009410286.1|-10000.0|PREDICTED: potassium transporter 23 [Musa acuminata subsp. malaccensis]
c172068_g2	-	-	-	-	-	WP_066927858.1|-53.9|Asp-tRNA(Asn)/Glu-tRNA(Gln) amidotransferase GatCAB subunit B [Methylobacterium sp. CCH5-D2]
c193983_g1	-	-	4641.GSMUA_AchrUn_randomP14120_001|-64.5|ENOG4111IDE|S|expressed protein	-	-	ONK78511.1|-105.5|uncharacterized protein A4U43_C02F19550 [Asparagus officinalis]
c229291_g1	cellular_component:integral component of membrane(GO:0016021);;molecular_function:oxidoreductase activity(GO:0016491);;molecular_function:metal ion binding(GO:0046872);;biological_process:oxidation-reduction process(GO:0055114);;molecular_function:monooxygenase activity(GO:0004497);;cellular_component:membrane(GO:0016020);;cellular_component:membrane(GO:0016020)	-	4641.GSMUA_Achr3P31300_001|-163.0|COG2124|Q|Cytochrome p450	-	Q9LUC8|C7A13_ARATH|-127.5|Cytochrome P450 72A13 OS=Arabidopsis thaliana GN=CYP72A13 PE=2 SV=1	XP_020265124.1|-183.3|cytochrome P450 72A15-like isoform X1 [Asparagus officinalis]
c217574_g2	cellular_component:membrane(GO:0016020);;cellular_component:integral component of membrane(GO:0016021);;biological_process:viral process(GO:0016032);;cellular_component:protein storage vacuole membrane(GO:0032586);;cellular_component:vacuole(GO:0005773);;cellular_component:endoplasmic reticulum(GO:0005783);;cellular_component:endoplasmic reticulum membrane(GO:0005789)	-	4641.GSMUA_Achr11P04400_001|-95.4|COG5066|U|Central component in molecular interactions underlying sperm crawling. Forms an extensive filament system that extends from sperm villipoda, along the leading edge of the pseudopod (By similarity)	-	Q8VZ95|VAP11_ARATH|-84.2|Vesicle-associated protein 1-1 OS=Arabidopsis thaliana GN=PVA11 PE=1 SV=1	XP_020277396.1|-102.6|vesicle-associated protein 1-1-like [Asparagus officinalis]
c228798_g3	-	-	4641.GSMUA_Achr5P26860_001|-55.4|ENOG41113BK|S|Protein of unknown function (DUF679)	PF05078.10|DUF679|3.1e-64|Protein of unknown function (DUF679)	-	XP_020243543.1|-58.5|uncharacterized protein LOC109821794 [Asparagus officinalis]
c152669_g1	-	npp:PP1Y_AT21673|-95.5|K01953|asnB, ASNS; asparagine synthase (glutamine-hydrolysing) [EC:6.3.5.4]|ko00250|Alanine, aspartate and glutamate metabolism;;	-	-	-	WP_060980261.1|-121.7|MULTISPECIES: amidotransferase 1, exosortase A system-associated [Proteobacteria]
c219049_g8	cellular_component:membrane(GO:0016020);;cellular_component:membrane(GO:0016020);;cellular_component:integral component of membrane(GO:0016021)	-	4641.GSMUA_Achr7P22980_001|-98.7|COG0517|S|Catalyzes the conversion of inosine 5'-phosphate (IMP) to xanthosine 5'-phosphate (XMP), the first committed and rate- limiting step in the de novo synthesis of guanine nucleotides, and therefore plays an important role in the regulation of cell growth (By similarity)	-	Q9FMV3|Y5349_ARATH|-90.7|CBS domain-containing protein CBSCBSPB1 OS=Arabidopsis thaliana GN=CBSCBSPB1 PE=1 SV=1	XP_020261085.1|-102.9|CBS domain-containing protein CBSCBSPB1-like isoform X1 [Asparagus officinalis]
c199431_g1	biological_process:response to toxic substance(GO:0009636);;molecular_function:transferase activity(GO:0016740);;molecular_function:glutathione transferase activity(GO:0004364);;cellular_component:cytoplasm(GO:0005737);;cellular_component:cytosol(GO:0005829)	pxb:103950893|-60.8|K00799|GST, gst; glutathione S-transferase [EC:2.5.1.18]|ko00480|Glutathione metabolism;;	29760.VIT_01s0026g01340.t01|-61.3|ENOG410XSIX|O|glutathione Stransferase	-	Q9FUS9|GSTUI_ARATH|-56.2|Glutathione S-transferase U18 OS=Arabidopsis thaliana GN=GSTU18 PE=2 SV=1	XP_009360417.1|-60.1|PREDICTED: glutathione S-transferase U17-like [Pyrus x bretschneideri]
c180810_g1	biological_process:protein transport(GO:0015031);;cellular_component:membrane(GO:0016020);;cellular_component:clathrin-coated vesicle membrane(GO:0030665);;cellular_component:cytoplasmic vesicle(GO:0031410);;cellular_component:Golgi apparatus(GO:0005794);;cellular_component:Golgi apparatus(GO:0005794);;biological_process:transport(GO:0006810)	-	4641.GSMUA_Achr2P06510_001|-57.5|ENOG410XPFS|U|Adaptor-related protein complex	-	Q9SAC9|AP1M1_ARATH|-57.1|AP-1 complex subunit mu-1 OS=Arabidopsis thaliana GN=AP1M1 PE=3 SV=1	XP_010923038.1|-55.3|PREDICTED: AP-1 complex subunit mu-2 [Elaeis guineensis]
c272564_g1	-	-	-	-	-	WP_066280627.1|-66.5|alanine racemase [Blastomonas sp. CCH1-A6]
c118445_g1	-	-	-	-	-	WP_066706863.1|-54.8|pyridoxal phosphate-dependent aminotransferase [Sphingomonas adhaesiva]
c180810_g2	biological_process:transport(GO:0006810);;biological_process:protein transport(GO:0015031);;cellular_component:membrane(GO:0016020);;cellular_component:clathrin-coated vesicle membrane(GO:0030665);;cellular_component:cytoplasmic vesicle(GO:0031410);;cellular_component:early endosome membrane(GO:0031901);;cellular_component:endosome(GO:0005768);;cellular_component:Golgi apparatus(GO:0005794);;cell…	-	15368.BRADI2G18010.1|-110.8|ENOG410XPFS|U|Adaptor-related protein complex	PF00928.19|Adap_comp_sub|9.4e-67|Adaptor complexes medium subunit family	O22715|AP1M2_ARATH|-108.2|AP-1 complex subunit mu-2 OS=Arabidopsis thaliana GN=AP1M2 PE=1 SV=1	XP_003567979.1|-108.8|PREDICTED: AP-1 complex subunit mu-2-like [Brachypodium distachyon]
c122621_g1	-	-	-	-	-	WP_066920765.1|-53.7|phosphate ABC transporter ATP-binding protein [Methylobacterium sp. CCH5-D2]
c151213_g1	-	-	-	-	-	WP_060979258.1|-52.6|MULTISPECIES: AcrB/AcrD/AcrF family protein [Proteobacteria]
c231106_g1	-	-	4641.GSMUA_Achr10P28590_001|-171.2|ENOG410XPVD|S|MTOR associated protein, LST8 homolog (S. cerevisiae)	-	-	ONK62253.1|-174.9|uncharacterized protein A4U43_C07F1940 [Asparagus officinalis]
c230943_g2	-	-	4641.GSMUA_Achr8P14460_001|-300.8|ENOG410Y72M|U|Component of oligomeric Golgi complex 6	PF06419.9|COG6|5.9e-226|Conserved oligomeric complex COG6	-	XP_020254766.1|-10000.0|conserved oligomeric Golgi complex subunit 6 isoform X1 [Asparagus officinalis]
c197626_g1	-	-	4641.GSMUA_Achr7P07980_001|-165.8|ENOG410XP7X|U|Endoplasmic reticulumgolgi intermediate compartment protein	-	-	OAY83706.1|-170.8|Endoplasmic reticulum-Golgi intermediate compartment protein 3, partial [Ananas comosus]
c133845_g1	-	-	3847.GLYMA03G29550.1|-51.9|ENOG410XNZC|S|oligo-peptide transporter	-	-	XP_010092336.1|-53.1|Oligopeptide transporter 1 [Morus notabilis]
c198263_g1	cellular_component:nucleus(GO:0005634);;cellular_component:nucleus(GO:0005634)	pda:103703071|-77.2|K12873|BUD31, G10; bud site selection protein 31|ko03040|Spliceosome;;	4555.Si023563m|-78.1|COG5132|DK|BUD31 homolog	PF01125.15|G10|1.9e-62|G10 protein	Q65WT0|BD31B_ORYSJ|-78.2|Protein BUD31 homolog 2 OS=Oryza sativa subsp. japonica GN=Os05g0446300 PE=2 SV=1	XP_020581576.1|-78.0|protein BUD31 homolog 2 [Phalaenopsis equestris]
c214375_g1	molecular_function:transferase activity(GO:0016740);;molecular_function:nucleotide binding(GO:0000166);;molecular_function:ATP binding(GO:0005524);;biological_process:protein ubiquitination(GO:0016567)	pda:103715319|-80.5|K04649|HIP2, UBC1; ubiquitin-conjugating enzyme (huntingtin interacting protein 2) [EC:2.3.2.23]|ko04120|Ubiquitin mediated proteolysis;;	39946.BGIOSGA000218-PA|-81.6|COG5078|O|ubiquitin-conjugating enzyme	-	Q9FI61|UBC27_ARATH|-75.2|Ubiquitin-conjugating enzyme E2 27 OS=Arabidopsis thaliana GN=UBC27 PE=2 SV=1	XP_020261141.1|-87.1|ubiquitin-conjugating enzyme E2 27-like isoform X1 [Asparagus officinalis]
c213738_g1	biological_process:gibberellic acid mediated signaling pathway(GO:0009740);;molecular_function:transferase activity(GO:0016740);;molecular_function:transferase activity, transferring glycosyl groups(GO:0016757);;cellular_component:nucleus(GO:0005634);;cellular_component:nucleus(GO:0005634);;biological_process:protein glycosylation(GO:0006486)	-	4113.PGSC0003DMT400023083|-10000.0|COG3914|O|protein N-acetylglucosaminyltransferase activity	-	Q8RVB2|SPY_SOLLC|-10000.0|Probable UDP-N-acetylglucosamine--peptide N-acetylglucosaminyltransferase SPINDLY OS=Solanum lycopersicum GN=SPY PE=2 SV=1	XP_020247137.1|-10000.0|probable UDP-N-acetylglucosamine--peptide N-acetylglucosaminyltransferase SPINDLY [Asparagus officinalis]
c226092_g1	-	-	3847.GLYMA08G26400.2|-117.7|ENOG4111HQB|S|EID1-like F-box protein	-	Q9LF38|EDL1_ARATH|-114.4|EID1-like F-box protein 1 OS=Arabidopsis thaliana GN=EDL1 PE=2 SV=1	XP_020276789.1|-121.4|EID1-like F-box protein 2 [Asparagus officinalis]
c190722_g1	molecular_function:isomerase activity(GO:0016853);;molecular_function:protein disulfide isomerase activity(GO:0003756);;cellular_component:extracellular region(GO:0005576);;cellular_component:extracellular region(GO:0005576)	mus:103971439|-170.5|K09584|PDIA6, TXNDC7; protein disulfide-isomerase A6 [EC:5.3.4.1]|ko04141|Protein processing in endoplasmic reticulum;;	4641.GSMUA_Achr11P13980_001|-171.8|COG0526|O|Thioredoxin	-	Q942L2|PDI22_ORYSJ|-161.1|Protein disulfide isomerase-like 2-2 OS=Oryza sativa subsp. japonica GN=PDIL2-2 PE=2 SV=1	XP_020254924.1|-172.5|protein disulfide isomerase-like 2-2 [Asparagus officinalis]
c174154_g1	-	-	4513.MLOC_12494.1|-185.9|ENOG410Z3U5|S|Protein of unknown function (DUF616)	PF04765.11|DUF616|6.7e-147|Protein of unknown function (DUF616)	-	XP_020265320.1|-229.7|uncharacterized protein LOC109840904 [Asparagus officinalis]
c201346_g1	biological_process:branched-chain amino acid biosynthetic process(GO:0009082);;biological_process:isoleucine biosynthetic process(GO:0009097);;biological_process:leucine biosynthetic process(GO:0009098);;biological_process:valine biosynthetic process(GO:0009099);;cellular_component:chloroplast(GO:0009507);;cellular_component:chloroplast(GO:0009507);;cellular_component:plastid(GO:0009536);;molecul…	egu:105055889|-161.5|K00826|E2.6.1.42, ilvE; branched-chain amino acid aminotransferase [EC:2.6.1.42]|ko00290|Valine, leucine and isoleucine biosynthesis;;ko00770|Pantothenate and CoA biosynthesis;;ko00280|Valine, leucine and isoleucine degradation;;ko01210|2-Oxocarboxylic acid metabolism;;ko01230|Biosynthesis of amino acids;;ko00270|Cysteine and methionine metabolism;;	4641.GSMUA_Achr8P05090_001|-161.6|COG0115|E|brancheD-chain amino acid aminotransferase	-	Q9M401|BCAT3_ARATH|-153.5|Branched-chain-amino-acid aminotransferase 3, chloroplastic OS=Arabidopsis thaliana GN=BCAT3 PE=1 SV=1	XP_020244674.1|-167.3|branched-chain-amino-acid aminotransferase 5, chloroplastic-like [Asparagus officinalis]
c104248_g1	-	-	-	-	-	WP_066274067.1|-88.9|NAD(P)H-quinone oxidoreductase [Blastomonas sp. CCH1-A6]
c178946_g1	-	-	4641.GSMUA_Achr4P30990_001|-58.1|COG5169|K|Transcription factor	-	-	XP_020244690.1|-55.3|heat stress transcription factor C-2a-like [Asparagus officinalis]
c196314_g1	cellular_component:anchored component of membrane(GO:0031225);;cellular_component:plasma membrane(GO:0005886);;cellular_component:plasma membrane(GO:0005886);;cellular_component:membrane(GO:0016020)	-	29760.VIT_12s0059g00570.t01|-71.6|ENOG410YHS4|M|Fasciclin-like arabinogalactan protein	-	Q9SJ81|FLA7_ARATH|-68.5|Fasciclin-like arabinogalactan protein 7 OS=Arabidopsis thaliana GN=FLA7 PE=1 SV=1	XP_020264200.1|-87.1|fasciclin-like arabinogalactan protein 7 [Asparagus officinalis]
c171960_g1	-	-	4641.GSMUA_Achr7P20030_001|-75.9|ENOG4111F79|O|translocase of inner mitochondrial membrane domain containing 1	-	-	XP_019164933.1|-78.2|PREDICTED: uncharacterized protein LOC109161071 isoform X1 [Ipomoea nil]
c190191_g1	cellular_component:cytoplasm(GO:0005737);;cellular_component:cytosol(GO:0005829);;cellular_component:cytosol(GO:0005829);;cellular_component:nucleus(GO:0005634);;cellular_component:nucleus(GO:0005634);;cellular_component:nucleus(GO:0005634)	atr:18434622|-106.7|K03115|CSNK2B; casein kinase II subunit beta|ko04712|Circadian rhythm - plant;;ko03008|Ribosome biogenesis in eukaryotes;;	4641.GSMUA_Achr6P11870_001|-102.5|COG5041|DKT|casein kinase ii	PF01214.16|CK_II_beta|6.6e-74|Casein kinase II regulatory subunit	P40229|CSK2C_ARATH|-84.3|Casein kinase II subunit beta-2 OS=Arabidopsis thaliana GN=CKB2 PE=1 SV=1	XP_020245788.1|-113.3|putative casein kinase II subunit beta-4 isoform X1 [Asparagus officinalis]
c84957_g1	-	-	-	-	-	OCJ11442.1|-62.9|hypothetical protein A6U87_27245 [Rhizobium sp. AC44/96]
c39571_g1	-	-	-	-	-	WP_066274969.1|-101.7|AAA family ATPase [Blastomonas sp. CCH1-A6]
c235223_g1	-	kok:KONIH1_23990|-73.3|K04720|cobD; threonine-phosphate decarboxylase [EC:4.1.1.81]|ko00860|Porphyrin and chlorophyll metabolism;;	-	-	-	AOV13887.1|-72.4|threonine-phosphate decarboxylase [Klebsiella sp. LTGPAF-6F]
c217711_g1	biological_process:cellular amino acid biosynthetic process(GO:0008652);;cellular_component:chloroplast(GO:0009507);;cellular_component:chloroplast(GO:0009507);;cellular_component:plastid(GO:0009536);;molecular_function:glutamate synthase (ferredoxin) activity(GO:0016041);;molecular_function:oxidoreductase activity(GO:0016491);;molecular_function:metal ion binding(GO:0046872);;molecular_function:…	egu:105049124|-10000.0|K00284|E1.4.7.1; glutamate synthase (ferredoxin) [EC:1.4.7.1]|ko00910|Nitrogen metabolism;;ko00630|Glyoxylate and dicarboxylate metabolism;;	29760.VIT_08s0007g05260.t01|-10000.0|COG0067|E|glutamate synthase	PF00310.19|GATase_2|5e-177|Glutamine amidotransferases class-II	Q69RJ0|GLTB_ORYSJ|-10000.0|Ferredoxin-dependent glutamate synthase, chloroplastic OS=Oryza sativa subsp. japonica GN=GLU PE=2 SV=2	XP_015646712.1|-10000.0|PREDICTED: ferredoxin-dependent glutamate synthase, chloroplastic [Oryza sativa Japonica Group]
c172205_g2	-	-	-	-	-	WP_066213601.1|-76.4|hypothetical protein [Blastomonas sp. CCH5-A3]
c292388_g1	-	-	29760.VIT_13s0019g03300.t01|-67.9|ENOG4111DX1|G|Glycosyl hydrolase family 17 protein	-	-	XP_008785594.1|-79.9|PREDICTED: glucan endo-1,3-beta-glucosidase 3 [Phoenix dactylifera]
c154837_g2	-	mpo:Mpop_3767|-59.4|K01999|livK; branched-chain amino acid transport system substrate-binding protein|ko02010|ABC transporters;;	-	-	-	WP_066926368.1|-63.5|ABC transporter substrate-binding protein [Methylobacterium sp. CCH5-D2]
c218018_g1	molecular_function:metal ion binding(GO:0046872);;molecular_function:phosphoprotein phosphatase activity(GO:0004721);;molecular_function:phosphoprotein phosphatase activity(GO:0004721);;molecular_function:hydrolase activity(GO:0016787)	pda:103697366|-101.6|K14497|PP2C; protein phosphatase 2C [EC:3.1.3.16]|ko04075|Plant hormone signal transduction;;	3711.Bra002038.1-P|-100.5|COG0631|T|Phosphatase	PF00481.19|PP2C|3.4e-66|Protein phosphatase 2C	Q9ZW21|P2C24_ARATH|-97.4|Probable protein phosphatase 2C 24 OS=Arabidopsis thaliana GN=At2g29380 PE=2 SV=1	XP_008777431.1|-100.8|PREDICTED: probable protein phosphatase 2C 24 [Phoenix dactylifera]
c229572_g2	-	-	-	-	-	XP_020242381.1|-48.5|CASP-like protein 2B1 [Asparagus officinalis]
c195146_g1	molecular_function:ATP binding(GO:0005524);;cellular_component:myosin complex(GO:0016459);;molecular_function:nucleotide binding(GO:0000166);;molecular_function:actin binding(GO:0003779);;molecular_function:calmodulin binding(GO:0005516)	-	4641.GSMUA_Achr4P07150_001|-137.4|COG5022|Z|myosin heavy chain	-	F4HXP9|MYO9_ARATH|-131.7|Myosin-9 OS=Arabidopsis thaliana GN=XI-C PE=2 SV=1	XP_020267960.1|-143.2|myosin-11-like [Asparagus officinalis]
c141726_g1	-	-	-	-	-	WP_066918060.1|-78.7|photosystem reaction center subunit H [Methylobacterium sp. CCH5-D2]
c228935_g4	-	-	-	-	-	XP_020261878.1|-54.1|uncharacterized protein LOC109837905 [Asparagus officinalis]
c216687_g1	-	-	4558.Sb09g026930.1|-79.2|ENOG411259N|S|Protein of unknown function (DUF1230)	-	-	XP_010941775.1|-79.7|PREDICTED: uncharacterized protein ycf36 [Elaeis guineensis]
c199712_g1	-	-	4641.GSMUA_Achr5P07020_001|-73.6|ENOG410XPMQ|K|homeobox	-	-	XP_020274689.1|-111.8|LOW QUALITY PROTEIN: BEL1-like homeodomain protein 9 [Asparagus officinalis]
c171037_g1	-	-	29760.VIT_01s0137g00770.t01|-74.2|ENOG4111F1E|S|lysine ketoglutarate reductase trans-splicing related 1	PF05212.10|DUF707|3.5e-80|Protein of unknown function (DUF707)	-	OVA20589.1|-73.9|Protein of unknown function DUF707 [Macleaya cordata]
c307516_g1	-	-	-	-	-	SDN80348.1|-69.1|penicillin-binding protein 1A [Phyllobacterium sp. OV277]
c119363_g1	-	-	-	-	-	OHC93956.1|-64.4|flagellar M-ring protein FliF [Sphingomonadales bacterium RIFCSPHIGHO2_01_FULL_65_20]
c227685_g2	cellular_component:lysosomal membrane(GO:0005765);;cellular_component:membrane(GO:0016020);;molecular_function:hydrolase activity(GO:0016787);;cellular_component:extracellular region(GO:0005576);;cellular_component:extracellular region(GO:0005576);;cellular_component:lysosome(GO:0005764)	egu:105033054|-227.3|K07964|HPSE; heparanase [EC:3.2.1.166]|ko00531|Glycosaminoglycan degradation;;	4555.Si016855m|-216.7|ENOG410YDJW|G|Heparanase	PF03662.12|Glyco_hydro_79n|4.8e-154|Glycosyl hydrolase family 79, N-terminal domain	Q9FZP1|HPSE3_ARATH|-180.3|Heparanase-like protein 3 OS=Arabidopsis thaliana GN=At5g34940 PE=2 SV=2	XP_020259334.1|-246.8|heparanase-like protein 3 [Asparagus officinalis]
c267439_g1	-	-	-	-	-	WP_060979041.1|-97.9|MULTISPECIES: sensor histidine kinase KdpD [Proteobacteria]
c180560_g1	-	-	3847.GLYMA05G13330.1|-154.0|ENOG410XPH5|S|K14797 essential nuclear protein 1	PF05291.9|Bystin|2.1e-130|Bystin	-	XP_020249407.1|-179.2|bystin [Asparagus officinalis]
c208861_g1	cellular_component:chloroplast(GO:0009507);;cellular_component:chloroplast(GO:0009507);;cellular_component:plastid(GO:0009536)	-	4641.GSMUA_Achr2P04910_001|-194.4|ENOG410Z7Z7|S|Pentatricopeptide repeat-containing protein	-	O64624|PP163_ARATH|-173.9|Pentatricopeptide repeat-containing protein At2g18940, chloroplastic OS=Arabidopsis thaliana GN=At2g18940 PE=2 SV=1	XP_020265865.1|-220.8|pentatricopeptide repeat-containing protein At2g18940, chloroplastic [Asparagus officinalis]
c157560_g1	-	-	29760.VIT_10s0003g00340.t01|-72.8|COG0515|T|Serine Threonine protein kinase	-	-	XP_008798337.1|-84.8|PREDICTED: putative receptor protein kinase CRINKLY4 [Phoenix dactylifera]
c185659_g1	-	-	-	-	-	WP_082750956.1|-56.0|FAD-dependent oxidoreductase [Blastomonas sp. CCH1-A6]
c225736_g3	-	-	3694.POPTR_0008s21850.1|-74.0|ENOG4111K5V|S|Reverse transcriptase (RNA-dependent DNA polymerase)	-	-	XP_020250145.1|-139.8|uncharacterized protein LOC109827551 [Asparagus officinalis]
c201627_g1	cellular_component:autophagosome(GO:0005776);;biological_process:transport(GO:0006810);;biological_process:catabolic autophagy(GO:0006914);;biological_process:protein transport(GO:0015031);;molecular_function:kinase activity(GO:0016301);;biological_process:phosphorylation(GO:0016310);;molecular_function:transferase activity(GO:0016740);;cellular_component:cytoplasmic vesicle(GO:0031410);;molecula…	-	3694.POPTR_0006s09400.1|-84.9|ENOG410XR01|T|Unc51-like kinase	-	F4IRW0|ATG1C_ARATH|-83.7|Serine/threonine-protein kinase ATG1c OS=Arabidopsis thaliana GN=ATG1C PE=2 SV=1	XP_020241298.1|-85.7|serine/threonine-protein kinase ATG1c-like isoform X2 [Asparagus officinalis]
c179720_g1	-	-	-	-	-	XP_008782196.1|-54.0|PREDICTED: uncharacterized protein LOC103701801 [Phoenix dactylifera]
c105022_g1	-	-	-	-	-	OHC92111.1|-55.8|hypothetical protein A2792_08590 [Sphingomonadales bacterium RIFCSPHIGHO2_01_FULL_65_20]
c150326_g1	cellular_component:plasma membrane(GO:0005886);;cellular_component:plasma membrane(GO:0005886);;cellular_component:plasma membrane(GO:0005886);;biological_process:zygote asymmetric cell division(GO:0010070);;cellular_component:membrane(GO:0016020);;cellular_component:integral component of membrane(GO:0016021);;molecular_function:kinase activity(GO:0016301);;biological_process:phosphorylation(GO:0…	-	29760.VIT_01s0010g02910.t01|-127.2|COG4886|S|leucine Rich Repeat	-	Q9ZU46|ZAR1_ARATH|-64.1|Receptor protein kinase-like protein ZAR1 OS=Arabidopsis thaliana GN=ZAR1 PE=1 SV=1	XP_015572287.1|-126.6|PREDICTED: probable inactive leucine-rich repeat receptor-like protein kinase At1g66830 [Ricinus communis]
c332746_g1	-	-	-	-	-	SDO73846.1|-77.0|ATP-binding cassette, subfamily F, uup [Phyllobacterium sp. OV277]
c150326_g2	cellular_component:integral component of membrane(GO:0016021);;cellular_component:plasma membrane(GO:0005886);;cellular_component:plasma membrane(GO:0005886);;cellular_component:membrane(GO:0016020)	-	29760.VIT_01s0010g02910.t01|-112.6|COG4886|S|leucine Rich Repeat	-	Q9C9N5|Y1668_ARATH|-63.1|Probable inactive leucine-rich repeat receptor-like protein kinase At1g66830 OS=Arabidopsis thaliana GN=At1g66830 PE=2 SV=1	XP_010248952.1|-112.5|PREDICTED: receptor protein kinase-like protein ZAR1 [Nelumbo nucifera]
c206912_g1	cellular_component:chloroplast(GO:0009507);;cellular_component:chloroplast(GO:0009507);;cellular_component:plastid(GO:0009536)	-	4577.GRMZM2G380195_P06|-208.7|ENOG410Z7Z7|S|Pentatricopeptide repeat-containing protein	-	Q9STF3|PP265_ARATH|-211.8|Pentatricopeptide repeat-containing protein At3g46790, chloroplastic OS=Arabidopsis thaliana GN=CRR2 PE=2 SV=1	ONK76886.1|-278.3|uncharacterized protein A4U43_C02F870 [Asparagus officinalis]
c230219_g3	molecular_function:nucleotide binding(GO:0000166);;molecular_function:ATP binding(GO:0005524);;cellular_component:microtubule(GO:0005874)	-	4555.Si021087m|-296.4|COG5059|Z|Kinesin family member	PF00225.21|Kinesin|9.4e-104|Kinesin motor domain	B9FL70|KN14K_ORYSJ|-290.3|Kinesin-like protein KIN-14K OS=Oryza sativa subsp. japonica GN=KIN14K PE=2 SV=1	XP_020271774.1|-10000.0|kinesin-like protein KIN-14C isoform X2 [Asparagus officinalis]
c156392_g1	molecular_function:alanine-glyoxylate transaminase activity(GO:0008453);;molecular_function:transaminase activity(GO:0008483);;biological_process:photorespiration(GO:0009853);;molecular_function:transferase activity(GO:0016740);;molecular_function:serine-glyoxylate transaminase activity(GO:0050281);;molecular_function:serine-pyruvate transaminase activity(GO:0004760);;cellular_component:peroxisom…	pda:103723389|-69.3|K00830|AGXT; alanine-glyoxylate transaminase / serine-glyoxylate transaminase / serine-pyruvate transaminase [EC:2.6.1.44 2.6.1.45 2.6.1.51]|ko00260|Glycine, serine and threonine metabolism;;ko00630|Glyoxylate and dicarboxylate metabolism;;ko04146|Peroxisome;;ko01200|Carbon metabolism;;ko00250|Alanine, aspartate and glutamate metabolism;;	3702.AT2G13360.1|-68.9|COG0075|E|aminotransferase	-	Q56YA5|SGAT_ARATH|-70.0|Serine--glyoxylate aminotransferase OS=Arabidopsis thaliana GN=AGT1 PE=1 SV=2	XP_017603890.1|-69.2|PREDICTED: serine--glyoxylate aminotransferase [Gossypium arboreum]
c138406_g1	-	-	-	-	-	WP_048462264.1|-56.3|translation factor Sua5 [Methylobacterium aquaticum]
c120566_g1	-	-	-	-	-	WP_066920663.1|-65.0|histidine kinase [Methylobacterium sp. CCH5-D2]
c184347_g1	-	-	4113.PGSC0003DMT400004986|-110.3|ENOG410YDQ9|S|Jumonji domain containing 7	PF13621.4|Cupin_8|2.5e-69|Cupin-like domain	-	XP_008797954.1|-117.2|PREDICTED: jmjC domain-containing protein 7 [Phoenix dactylifera]
c178552_g1	-	-	-	-	-	WP_060977296.1|-63.7|MULTISPECIES: RidA family protein [Proteobacteria]
c196064_g1	-	-	4641.GSMUA_Achr2P12230_001|-69.0|COG5038|S|Domain-Containing protein	-	-	XP_020261705.1|-72.9|synaptotagmin-5-like isoform X2 [Asparagus officinalis]
c212176_g1	cellular_component:nucleolus(GO:0005730);;cellular_component:nucleolus(GO:0005730);;cellular_component:cytoplasm(GO:0005737);;cellular_component:cytoplasm(GO:0005737);;molecular_function:zinc ion binding(GO:0008270);;biological_process:negative regulation of flower development(GO:0009910);;molecular_function:metal ion binding(GO:0046872);;cellular_component:nucleus(GO:0005634);;cellular_component…	-	4641.GSMUA_Achr4P25250_001|-66.3|COG2608|S|heavy metal transport detoxification protein	-	Q9FJH5|HIP3_ARATH|-53.1|Heavy metal-associated isoprenylated plant protein 3 OS=Arabidopsis thaliana GN=HIPP03 PE=1 SV=1	XP_020260900.1|-83.1|heavy metal-associated isoprenylated plant protein 3-like [Asparagus officinalis]
c212032_g2	-	-	29760.VIT_01s0011g03130.t01|-91.4|ENOG4111EXZ|S|BRO1-like domain	-	-	XP_020271287.1|-115.8|uncharacterized protein LOC109846459 [Asparagus officinalis]
c217461_g1	cellular_component:integral component of membrane(GO:0016021);;molecular_function:oxidoreductase activity(GO:0016491);;molecular_function:metal ion binding(GO:0046872);;biological_process:oxidation-reduction process(GO:0055114);;molecular_function:monooxygenase activity(GO:0004497);;cellular_component:membrane(GO:0016020);;cellular_component:membrane(GO:0016020)	-	4641.GSMUA_Achr10P21290_001|-185.2|COG2124|Q|Cytochrome p450	PF00067.20|p450|4.4e-71|Cytochrome P450	B9DFU2|MAX1_ARATH|-144.9|Cytochrome P450 711A1 OS=Arabidopsis thaliana GN=CYP711A1 PE=2 SV=1	XP_010925466.1|-187.3|PREDICTED: cytochrome P450 711A1 [Elaeis guineensis]
c222619_g2	cellular_component:nucleus(GO:0005634);;cellular_component:chromosome(GO:0005694);;cellular_component:chromosome(GO:0005694);;cellular_component:nucleosome(GO:0000786);;molecular_function:DNA binding(GO:0003677);;cellular_component:nucleus(GO:0005634)	-	4558.Sb01g049250.1|-52.1|COG2036|B|Core component of nucleosome. Nucleosomes wrap and compact DNA into chromatin, limiting DNA accessibility to the cellular machineries which require DNA as a template. Histones thereby play a central role in transcription regulation, DNA repair, DNA replication and chromosomal stability. DNA accessibility is regulated via a complex set of post-translational modif…	-	Q6WZ83|H4_EUCGL|-53.4|Histone H4 OS=Eucalyptus globulus PE=3 SV=3	KJB20142.1|-49.9|hypothetical protein B456_003G134900 [Gossypium raimondii]
c216968_g2	-	-	-	-	-	XP_020271356.1|-56.8|uncharacterized protein LOC109846501 isoform X1 [Asparagus officinalis]
c216824_g2	-	-	-	-	-	XP_020275907.1|-111.6|uncharacterized protein LOC109850320 isoform X2 [Asparagus officinalis]
c285480_g1	-	-	-	-	-	KHS49503.1|-113.7|NHL repeat protein [Novosphingobium subterraneum]
c130396_g1	-	stax:MC45_09625|-58.9|K00013|hisD; histidinol dehydrogenase [EC:1.1.1.23]|ko01230|Biosynthesis of amino acids;;ko00340|Histidine metabolism;;	-	-	-	WP_060978295.1|-89.8|MULTISPECIES: histidinol dehydrogenase [Proteobacteria]
c216824_g3	cellular_component:plastid(GO:0009536);;cellular_component:chloroplast inner membrane(GO:0009706);;biological_process:protein transport(GO:0015031);;cellular_component:membrane(GO:0016020);;cellular_component:integral component of membrane(GO:0016021);;biological_process:transport(GO:0006810);;cellular_component:chloroplast(GO:0009507);;cellular_component:plastid inner membrane(GO:0009528)	-	29760.VIT_09s0054g00520.t01|-72.8|ENOG4112D2K|S|Its presence in a non-photosynthetic plant (Epifagus virginiana) and experiments in tobacco indicate that it may have a function which is probably not related to photosynthesis	PF05758.10|Ycf1|8.1e-120|Ycf1	Q0G9G1|TI214_LIRTU|-119.1|Protein TIC 214 OS=Liriodendron tulipifera GN=TIC214 PE=3 SV=1	YP_009317174.1|-217.9|Ycf1 (chloroplast) [Allium sativum]
c250291_g1	-	-	-	-	-	WP_019574947.1|-49.8|efflux RND transporter periplasmic adaptor subunit [Curvibacter lanceolatus]
c198907_g1	-	-	4558.Sb03g040180.1|-157.8|ENOG410YADF|S|transferase) family	PF02458.13|Transferase|1.4e-96|Transferase family	-	XP_008785410.2|-178.4|PREDICTED: uncharacterized acetyltransferase At3g50280 [Phoenix dactylifera]
c198825_g1	-	maqu:Maq22A_c14125|-58.4|K00997|acpS; holo-[acyl-carrier protein] synthase [EC:2.7.8.7]|ko00770|Pantothenate and CoA biosynthesis;;	-	-	-	WP_066927210.1|-69.0|holo-ACP synthase [Methylobacterium sp. CCH5-D2]
c199462_g1	cellular_component:chloroplast(GO:0009507);;cellular_component:chloroplast(GO:0009507);;cellular_component:plastid(GO:0009536);;molecular_function:nucleotide binding(GO:0000166);;molecular_function:ATP binding(GO:0005524);;cellular_component:microtubule(GO:0005874)	-	4641.GSMUA_Achr11P11900_001|-223.6|COG5059|Z|Kinesin family member	-	B9FFA3|KN7E_ORYSJ|-212.6|Kinesin-like protein KIN-7E, chloroplastic OS=Oryza sativa subsp. japonica GN=KIN7E PE=3 SV=2	XP_020106536.1|-222.6|kinesin-like protein KIN-7E, chloroplastic [Ananas comosus]
c215574_g1	cellular_component:nucleus(GO:0005634);;cellular_component:nucleus(GO:0005634);;molecular_function:metal ion binding(GO:0046872)	-	39947.LOC_Os03g08370.1|-220.2|ENOG410ZJVC|S|transposon protein	-	Q9SWG3|FAR1_ARATH|-55.9|Protein FAR-RED IMPAIRED RESPONSE 1 OS=Arabidopsis thaliana GN=FAR1 PE=1 SV=1	XP_020244856.1|-244.4|protein FAR1-RELATED SEQUENCE 5-like [Asparagus officinalis]
c181004_g1	-	-	-	-	-	SDA12973.1|-180.2|hypothetical protein SAMN02799622_00870 [Methylobacterium sp. UNC378MF]
c226654_g1	molecular_function:lyase activity(GO:0016829);;molecular_function:1-aminocyclopropane-1-carboxylate synthase activity(GO:0016847);;biological_process:ethylene biosynthetic process(GO:0009693);;biological_process:ethylene biosynthetic process(GO:0009693);;biological_process:fruit ripening(GO:0009835)	thj:104824936|-184.6|K01762|ACS; 1-aminocyclopropane-1-carboxylate synthase [EC:4.4.1.14]|ko00270|Cysteine and methionine metabolism;;	59689.fgenesh2_kg.7__272__AT4G37770.1|-180.6|COG0436|E|aminotransferase	PF00155.19|Aminotran_1_2|6e-96|Aminotransferase class I and II	Q42881|1A13_SOLLC|-181.7|1-aminocyclopropane-1-carboxylate synthase 3 OS=Solanum lycopersicum GN=ACS3 PE=1 SV=1	XP_010555438.1|-183.8|PREDICTED: 1-aminocyclopropane-1-carboxylate synthase 8 [Tarenaya hassleriana]
c181148_g1	cellular_component:membrane(GO:0016020);;cellular_component:integral component of membrane(GO:0016021);;molecular_function:oxidoreductase activity(GO:0016491);;molecular_function:metal ion binding(GO:0046872);;molecular_function:dioxygenase activity(GO:0051213);;biological_process:oxidation-reduction process(GO:0055114);;molecular_function:procollagen-proline 4-dioxygenase activity(GO:0004656);;c…	pda:103721115|-122.7|K00472|P4HA; prolyl 4-hydroxylase [EC:1.14.11.2]|ko00330|Arginine and proline metabolism;;	4641.GSMUA_AchrUn_randomP06330_001|-121.5|ENOG410XS5J|S|prolyl 4-hydroxylase	-	Q9LN20|P4H3_ARATH|-121.1|Probable prolyl 4-hydroxylase 3 OS=Arabidopsis thaliana GN=P4H3 PE=2 SV=1	XP_020241695.1|-133.9|probable prolyl 4-hydroxylase 3 [Asparagus officinalis]
c227822_g5	biological_process:carbohydrate metabolic process(GO:0005975);;biological_process:metabolic process(GO:0008152);;molecular_function:cellulase activity(GO:0008810);;molecular_function:hydrolase activity(GO:0016787);;molecular_function:hydrolase activity, acting on glycosyl bonds(GO:0016798);;biological_process:cellulose catabolic process(GO:0030245);;biological_process:cell wall organization(GO:00…	pop:POPTR_0014s04390g|-53.4|K01179|E3.2.1.4; endoglucanase [EC:3.2.1.4]|ko00500|Starch and sucrose metabolism;;	3694.POPTR_0014s04390.1|-54.7|-|-|-	-	Q6H3Z9|GUN22_ORYSJ|-51.8|Endoglucanase 22 OS=Oryza sativa subsp. japonica GN=GLU11 PE=2 SV=2	XP_009607784.1|-53.9|PREDICTED: endoglucanase 12-like [Nicotiana tomentosiformis]
c228541_g6	-	-	4113.PGSC0003DMT400034851|-61.2|ENOG410Y6CZ|S|Agenet domain	-	-	ONK70250.1|-71.6|uncharacterized protein A4U43_C05F31800 [Asparagus officinalis]
c201908_g1	-	-	-	-	-	XP_020257075.1|-49.3|uncharacterized protein LOC109833706 isoform X2 [Asparagus officinalis]
c227822_g7	biological_process:regulation of endodermal cell differentiation(GO:1903224);;biological_process:endodermal cell differentiation(GO:0035987);;molecular_function:protein binding(GO:0005515);;biological_process:regulation of root morphogenesis(GO:2000067);;biological_process:regulation of cell fate specification(GO:0042659);;molecular_function:ATP binding(GO:0005524);;biological_process:regulation …	-	3694.POPTR_0039s00380.1|-85.2|COG4886|S|leucine Rich Repeat	-	C0LGQ5|GSO1_ARATH|-67.4|LRR receptor-like serine/threonine-protein kinase GSO1 OS=Arabidopsis thaliana GN=GSO1 PE=1 SV=1	XP_019702960.1|-143.5|PREDICTED: receptor-like protein 12 [Elaeis guineensis]
c201908_g2	-	-	-	-	-	XP_020104208.1|-76.4|uncharacterized protein LOC109721170 isoform X3 [Ananas comosus]
c213625_g1	molecular_function:hydrolase activity(GO:0016787);;molecular_function:thiol-dependent ubiquitinyl hydrolase activity(GO:0036459);;biological_process:proteolysis(GO:0006508);;molecular_function:peptidase activity(GO:0008233);;molecular_function:cysteine-type peptidase activity(GO:0008234)	-	4538.ORGLA11G0146900.1|-10000.0|COG5077|O|ubiquitin carboxyl-terminal hydrolase	PF12436.6|USP7_ICP0_bdg|4.8e-77|ICP0-binding domain of Ubiquitin-specific protease 7	Q84WU2|UBP13_ARATH|-10000.0|Ubiquitin carboxyl-terminal hydrolase 13 OS=Arabidopsis thaliana GN=UBP13 PE=2 SV=1	XP_010917891.1|-10000.0|PREDICTED: ubiquitin carboxyl-terminal hydrolase 12 isoform X7 [Elaeis guineensis]
c214262_g1	biological_process:transport(GO:0006810);;biological_process:transport(GO:0006810);;biological_process:defense response(GO:0006952);;biological_process:response to auxin(GO:0009733);;biological_process:response to auxin(GO:0009733);;biological_process:protein transport(GO:0015031);;cellular_component:membrane(GO:0016020);;cellular_component:nuclear membrane(GO:0031965);;biological_process:mRNA tr…	pda:103715230|-10000.0|K14297|NUP98, ADAR2, NUP116; nuclear pore complex protein Nup98-Nup96|ko03013|RNA transport;;	4558.Sb01g045670.1|-308.9|ENOG410ZXB8|U|nucleoporin	PF12110.6|Nup96|2.6e-72|Nuclear protein 96	Q8LLD0|NUP96_ARATH|-10000.0|Nuclear pore complex protein NUP96 OS=Arabidopsis thaliana GN=NUP96 PE=1 SV=1	XP_008801016.1|-10000.0|PREDICTED: nuclear pore complex protein NUP96 isoform X1 [Phoenix dactylifera]
c201908_g3	-	-	-	-	-	XP_020257075.1|-54.6|uncharacterized protein LOC109833706 isoform X2 [Asparagus officinalis]
c207974_g1	-	-	4113.PGSC0003DMT400064779|-96.0|ENOG410YAGH|S|C1-like domain	-	-	XP_010910318.1|-104.7|PREDICTED: uncharacterized protein LOC105036256 [Elaeis guineensis]
c207830_g1	-	-	4555.Si030824m|-53.8|COG0484|O|ATP binding to DnaK triggers the release of the substrate protein, thus completing the reaction cycle. Several rounds of ATP-dependent interactions between DnaJ, DnaK and GrpE are required for fully efficient folding. Also involved, together with DnaK and GrpE, in the DNA replication of plasmids through activation of initiation proteins (By similarity)	-	-	XP_020276180.1|-77.4|uncharacterized protein LOC109850560 isoform X2 [Asparagus officinalis]
c289123_g1	-	nar:Saro_2443|-90.6|K04091|ssuD; alkanesulfonate monooxygenase [EC:1.14.14.5]|ko00920|Sulfur metabolism;;	-	-	-	WP_060978684.1|-99.6|MULTISPECIES: alkanesulfonate monooxygenase [Proteobacteria]
c219691_g1	-	-	15368.BRADI1G76850.1|-69.2|COG1597|I|diacylglycerol kinase	-	-	XP_020247652.1|-76.3|sphingoid long-chain bases kinase 2, mitochondrial isoform X2 [Asparagus officinalis]
c224705_g2	molecular_function:transferase activity(GO:0016740);;molecular_function:nucleotide binding(GO:0000166);;molecular_function:ATP binding(GO:0005524);;biological_process:protein ubiquitination(GO:0016567)	pda:103718125|-75.5|K06688|UBE2C, UBC11; ubiquitin-conjugating enzyme E2 C [EC:2.3.2.23]|ko04120|Ubiquitin mediated proteolysis;;	4641.GSMUA_Achr7P22730_001|-78.0|ENOG4111IGV|O|ubiquitin-conjugating enzyme	-	Q8L7T3|UBC20_ARATH|-58.2|Ubiquitin-conjugating enzyme E2 20 OS=Arabidopsis thaliana GN=UBC20 PE=2 SV=1	XP_009410605.1|-76.1|PREDICTED: probable ubiquitin-conjugating enzyme E2 C isoform X1 [Musa acuminata subsp. malaccensis]
c225342_g2	molecular_function:metal ion binding(GO:0046872);;molecular_function:nuclease activity(GO:0004518);;molecular_function:endonuclease activity(GO:0004519);;molecular_function:hydrolase activity(GO:0016787)	-	4641.GSMUA_Achr1P21000_001|-110.8|ENOG4111UE2|S|S1 P1 Nuclease	PF02265.14|S1-P1_nuclease|2.4e-84|S1/P1 Nuclease	Q9C9G4|ENDO2_ARATH|-92.5|Endonuclease 2 OS=Arabidopsis thaliana GN=ENDO2 PE=1 SV=1	XP_008797809.1|-113.4|PREDICTED: endonuclease 2-like isoform X2 [Phoenix dactylifera]
c120847_g1	cellular_component:plastid(GO:0009536);;cellular_component:thylakoid(GO:0009579);;biological_process:photosynthesis(GO:0015979);;cellular_component:membrane(GO:0016020);;cellular_component:chloroplast(GO:0009507);;cellular_component:photosystem II(GO:0009523);;cellular_component:chloroplast thylakoid membrane(GO:0009535)	pop:POPTR_0005s22830g|-57.5|K02717|psbP; photosystem II oxygen-evolving enhancer protein 2|ko00195|Photosynthesis;;	3694.POPTR_0005s22830.1|-58.7|ENOG4110ARY|S|Oxygen-evolving enhancer protein 2	-	P16059|PSBP_PEA|-55.9|Oxygen-evolving enhancer protein 2, chloroplastic OS=Pisum sativum GN=PSBP PE=1 SV=1	XP_002307570.1|-56.7|photosystem II oxygen-evolving complex protein 2 precursor [Populus trichocarpa]
c320779_g1	-	-	-	-	-	XP_019107701.1|-64.5|PREDICTED: uncharacterized protein LOC104905474 isoform X2 [Beta vulgaris subsp. vulgaris]
c131927_g1	-	-	-	-	-	WP_066275507.1|-77.5|hypothetical protein [Blastomonas sp. CCH1-A6]
c212457_g1	cellular_component:intracellular ribonucleoprotein complex(GO:0030529);;cellular_component:cytoplasm(GO:0005737);;cellular_component:cytoplasm(GO:0005737);;cellular_component:ribosome(GO:0005840)	nnu:104599935|-214.1|K02925|RP-L3e, RPL3; large subunit ribosomal protein L3e|ko03010|Ribosome;;	4641.GSMUA_Achr7P03150_001|-214.1|COG0087|J|One of the primary rRNA binding proteins, it binds directly near the 3'-end of the 23S rRNA, where it nucleates assembly of the 50S subunit (By similarity)	PF00297.20|Ribosomal_L3|5e-193|Ribosomal protein L3	P35684|RL3_ORYSJ|-208.0|60S ribosomal protein L3 OS=Oryza sativa subsp. japonica GN=RPL3 PE=2 SV=2	XP_020247594.1|-215.8|60S ribosomal protein L3 isoform X1 [Asparagus officinalis]
c91132_g1	-	-	-	-	-	WP_066926964.1|-81.9|Rieske (2Fe-2S) protein [Methylobacterium sp. CCH5-D2]
c241049_g1	-	-	-	-	-	SEL76865.1|-48.8|succinate-semialdehyde dehydrogenase / glutarate-semialdehyde dehydrogenase [Sphingomonas sp. JS21-1]
c90413_g1	-	-	4558.Sb01g045280.1|-10000.0|ENOG410XQ0A|S|tubulin tyrosine ligase-like family, member 12	-	-	XP_020104878.1|-10000.0|tubulin--tyrosine ligase-like protein 12 [Ananas comosus]
c72901_g1	biological_process:chloride transport(GO:0006821);;molecular_function:symporter activity(GO:0015293);;molecular_function:potassium:chloride symporter activity(GO:0015379);;cellular_component:membrane(GO:0016020);;cellular_component:membrane(GO:0016020);;cellular_component:integral component of membrane(GO:0016021);;biological_process:chloride ion homeostasis(GO:0055064);;biological_process:potass…	-	4641.GSMUA_Achr7P20560_001|-206.4|COG0531|E|amino acid	-	Q6Z0E2|CCC1_ORYSJ|-204.2|Cation-chloride cotransporter 1 OS=Oryza sativa subsp. japonica GN=CCC1 PE=2 SV=1	XP_010928376.1|-205.9|PREDICTED: cation-chloride cotransporter 1-like [Elaeis guineensis]
c224174_g1	cellular_component:integral component of membrane(GO:0016021);;molecular_function:transferase activity(GO:0016740);;molecular_function:transferase activity, transferring glycosyl groups(GO:0016757);;biological_process:pectin biosynthetic process(GO:0045489);;biological_process:cell wall organization(GO:0071555);;cellular_component:Golgi membrane(GO:0000139);;cellular_component:Golgi apparatus(GO:…	pda:103720877|-171.5|K13648|GAUT; alpha-1,4-galacturonosyltransferase [EC:2.4.1.43]|ko00520|Amino sugar and nucleotide sugar metabolism;;ko00500|Starch and sucrose metabolism;;	4641.GSMUA_Achr1P11850_001|-168.9|ENOG410YA0P|M|Galacturonosyltransferase	PF01501.18|Glyco_transf_8|1.9e-67|Glycosyl transferase family 8	Q9M9Y5|GAUT6_ARATH|-138.1|Probable galacturonosyltransferase 6 OS=Arabidopsis thaliana GN=GAUT6 PE=2 SV=1	XP_020277321.1|-223.3|probable galacturonosyltransferase 6 isoform X1 [Asparagus officinalis]
c189913_g2	-	-	4641.GSMUA_AchrUn_randomP12360_001|-64.6|ENOG4112D0W|S|Syntaxin 6, N-terminal	-	-	XP_020262019.1|-87.1|uncharacterized protein LOC109838022 isoform X1 [Asparagus officinalis]
c109564_g1	cellular_component:cytoskeleton(GO:0005856);;cellular_component:cytoskeleton(GO:0005856);;molecular_function:nucleotide binding(GO:0000166);;molecular_function:ATP binding(GO:0005524);;cellular_component:cytoplasm(GO:0005737)	-	3694.POPTR_0006s20710.1|-87.8|COG5277|Z|Actin-related protein	-	O81221|ACT_GOSHI|-88.0|Actin OS=Gossypium hirsutum PE=3 SV=1	XP_016706703.1|-86.3|PREDICTED: actin-like [Gossypium hirsutum]
c165804_g1	-	-	-	-	-	WP_066114481.1|-59.6|MULTISPECIES: aminoglycoside phosphotransferase [Sphingomonadales]
c223537_g3	cellular_component:cell wall(GO:0005618);;biological_process:metabolic process(GO:0008152);;molecular_function:hydrolase activity(GO:0016787);;molecular_function:hydrolase activity, acting on glycosyl bonds(GO:0016798);;molecular_function:glucan endo-1,3-beta-D-glucosidase activity(GO:0042973);;biological_process:cell wall organization(GO:0071555);;cellular_component:extracellular region(GO:00055…	-	29760.VIT_16s0098g01560.t01|-166.1|ENOG410YCVQ|G|glucan endo-1-3-beta-glucosidase	PF00332.16|Glyco_hydro_17|1.1e-84|Glycosyl hydrolases family 17	Q9M069|E137_ARATH|-100.3|Glucan endo-1,3-beta-glucosidase 7 OS=Arabidopsis thaliana GN=At4g34480 PE=1 SV=2	XP_020262264.1|-190.3|glucan endo-1,3-beta-glucosidase [Asparagus officinalis]
c68050_g1	molecular_function:lactoylglutathione lyase activity(GO:0004462);;molecular_function:lyase activity(GO:0016829)	mus:103978686|-185.9|K18881|DJ1D; D-lactate dehydratase [EC:4.2.1.130]|ko00620|Pyruvate metabolism;;	4641.GSMUA_Achr3P27080_001|-187.2|COG0693|S|PfpI family	-	Q9M8R4|DJ1D_ARATH|-171.2|Protein DJ-1 homolog D OS=Arabidopsis thaliana GN=DJ1D PE=1 SV=1	XP_020259786.1|-189.7|protein DJ-1 homolog D-like [Asparagus officinalis]
c224174_g4	-	-	4558.Sb03g010200.1|-189.0|COG0438|M|Glycosyl transferase (Group 1	PF16994.3|Glyco_trans_4_5|9.2e-68|Glycosyl-transferase family 4	-	OVA08729.1|-197.7|Glycosyl transferase [Macleaya cordata]
c211145_g1	-	-	4113.PGSC0003DMT400019834|-68.8|ENOG41121N2|O|zinc ion binding	-	-	XP_017972774.1|-63.2|PREDICTED: E3 ubiquitin-protein ligase Os04g0590900 [Theobroma cacao]
c211001_g1	-	-	4081.Solyc10g006120.1.1|-126.9|ENOG410XQ41|S|Protein of unknown function (DUF3537)	PF12056.6|DUF3537|3.6e-155|Protein of unknown function (DUF3537)	-	XP_020692590.1|-143.9|uncharacterized protein LOC110106869 [Dendrobium catenatum]
c72370_g1	-	-	-	-	-	WP_066213490.1|-75.7|hypothetical protein [Blastomonas sp. CCH5-A3]
c268638_g1	-	-	-	-	-	WP_066926324.1|-70.0|ABC transporter ATP-binding protein [Methylobacterium sp. CCH5-D2]
c216492_g1	cellular_component:nucleolus(GO:0005730);;biological_process:rRNA processing(GO:0006364);;molecular_function:methyltransferase activity(GO:0008168);;molecular_function:transferase activity(GO:0016740);;biological_process:methylation(GO:0032259);;molecular_function:RNA binding(GO:0003723);;cellular_component:nucleus(GO:0005634);;cellular_component:nucleus(GO:0005634)	-	4577.GRMZM2G136599_P01|-144.5|COG0030|J|Specifically dimethylates two adjacent adenosines (A1518 and A1519) in the loop of a conserved hairpin near the 3'-end of 16S rRNA in the 30S particle. May play a critical role in biogenesis of 30S subunits (By similarity)	PF00398.18|RrnaAD|7.3e-61|Ribosomal RNA adenine dimethylase	O22268|DIM1A_ARATH|-132.1|Ribosomal RNA small subunit methyltransferase OS=Arabidopsis thaliana GN=DIM1A PE=1 SV=1	XP_020265689.1|-158.5|ribosomal RNA small subunit methyltransferase [Asparagus officinalis]
c199825_g1	biological_process:metabolic process(GO:0008152);;cellular_component:membrane(GO:0016020);;molecular_function:hydrolase activity(GO:0016787);;molecular_function:hydrolase activity, acting on glycosyl bonds(GO:0016798);;cellular_component:anchored component of membrane(GO:0031225);;molecular_function:glucan endo-1,3-beta-D-glucosidase activity(GO:0042973);;cellular_component:plasma membrane(GO:000…	pda:103706713|-122.8|K19892|GN4; glucan endo-1,3-beta-glucosidase 4 [EC:3.2.1.39]|ko00500|Starch and sucrose metabolism;;	4641.GSMUA_Achr6P29690_001|-118.8|ENOG410YASF|G|glucan endo-1,3-beta-glucosidase	PF00332.16|Glyco_hydro_17|7.1e-71|Glycosyl hydrolases family 17	Q94CD8|E134_ARATH|-98.7|Glucan endo-1,3-beta-glucosidase 4 OS=Arabidopsis thaliana GN=At3g13560 PE=1 SV=1	ONK65599.1|-127.2|uncharacterized protein A4U43_C07F38740 [Asparagus officinalis]
c218049_g5	-	-	15368.BRADI2G50450.1|-96.1|ENOG4111K05|S|SAP30 binding protein	-	-	XP_020264082.1|-125.0|SAP30-binding protein isoform X1 [Asparagus officinalis]
c272876_g1	-	mch:Mchl_0944|-56.8|K00855|PRK, prkB; phosphoribulokinase [EC:2.7.1.19]|ko00710|Carbon fixation in photosynthetic organisms;;ko01200|Carbon metabolism;;	-	-	-	WP_066920796.1|-64.5|phosphoribulokinase [Methylobacterium sp. CCH5-D2]
c215855_g2	molecular_function:ATP binding(GO:0005524);;cellular_component:mitochondrion(GO:0005739);;cellular_component:mitochondrion(GO:0005739);;cellular_component:chloroplast(GO:0009507);;cellular_component:chloroplast(GO:0009507);;cellular_component:plastid(GO:0009536);;molecular_function:ligase activity(GO:0016874);;molecular_function:nucleotide binding(GO:0000166);;molecular_function:aminoacyl-tRNA li…	pda:103696183|-193.3|K01881|PARS, proS; prolyl-tRNA synthetase [EC:6.1.1.15]|ko00970|Aminoacyl-tRNA biosynthesis;;	4641.GSMUA_Achr5P23600_001|-191.0|COG0442|J|Catalyzes the attachment of proline to tRNA(Pro) in a two-step reaction proline is first activated by ATP to form Pro- AMP and then transferred to the acceptor end of tRNA(Pro). As ProRS can inadvertently accommodate and process non-cognate amino acids such as alanine and cysteine, to avoid such errors it has two additional distinct editing activities a…	-	Q9FYR6|SYPM_ARATH|-184.0|Proline--tRNA ligase, chloroplastic/mitochondrial OS=Arabidopsis thaliana GN=OVA6 PE=2 SV=1	ONK65088.1|-197.7|uncharacterized protein A4U43_C07F33480 [Asparagus officinalis]
c129837_g1	-	-	-	-	-	WP_003597831.1|-103.9|integrase [Methylobacterium extorquens]
c111853_g1	-	-	-	-	-	WP_066919172.1|-63.4|polyphosphate kinase [Methylobacterium sp. CCH5-D2]
c111997_g1	-	-	39946.BGIOSGA011860-PA|-80.5|ENOG4111PIV|S|Protein of unknown function (DUF1997)	-	-	XP_010907449.1|-79.3|PREDICTED: uncharacterized protein LOC105034116 [Elaeis guineensis]
c229129_g5	molecular_function:peptide binding(GO:0042277);;molecular_function:transmembrane receptor protein tyrosine kinase activity(GO:0004714);;molecular_function:peptide binding(GO:0042277);;molecular_function:ATP binding(GO:0005524);;biological_process:regulation of shoot system development(GO:0048831);;cellular_component:plasma membrane(GO:0005886);;cellular_component:plasma membrane(GO:0005886);;biol…	-	4555.Si021094m|-10000.0|COG4886|S|leucine Rich Repeat	-	Q9FGL5|CEPR1_ARATH|-295.9|Receptor protein-tyrosine kinase CEPR1 OS=Arabidopsis thaliana GN=CEPR1 PE=1 SV=1	XP_018683649.1|-10000.0|PREDICTED: receptor-like protein kinase HSL1 [Musa acuminata subsp. malaccensis]
c141082_g1	-	-	3694.POPTR_0004s21720.1|-89.9|ENOG4111R6V|S|NA	-	-	XP_008786692.1|-94.6|PREDICTED: uncharacterized protein LOC103704941 [Phoenix dactylifera]
c215855_g4	molecular_function:ATP binding(GO:0005524);;cellular_component:mitochondrion(GO:0005739);;cellular_component:mitochondrion(GO:0005739);;cellular_component:chloroplast(GO:0009507);;cellular_component:chloroplast(GO:0009507);;cellular_component:plastid(GO:0009536);;molecular_function:ligase activity(GO:0016874);;molecular_function:nucleotide binding(GO:0000166);;molecular_function:aminoacyl-tRNA li…	pda:103696183|-74.0|K01881|PARS, proS; prolyl-tRNA synthetase [EC:6.1.1.15]|ko00970|Aminoacyl-tRNA biosynthesis;;	29760.VIT_16s0050g00960.t01|-74.2|COG0442|J|Catalyzes the attachment of proline to tRNA(Pro) in a two-step reaction proline is first activated by ATP to form Pro- AMP and then transferred to the acceptor end of tRNA(Pro). As ProRS can inadvertently accommodate and process non-cognate amino acids such as alanine and cysteine, to avoid such errors it has two additional distinct editing activities a…	-	Q9FYR6|SYPM_ARATH|-73.0|Proline--tRNA ligase, chloroplastic/mitochondrial OS=Arabidopsis thaliana GN=OVA6 PE=2 SV=1	XP_020274123.1|-78.0|proline--tRNA ligase, chloroplastic/mitochondrial isoform X2 [Asparagus officinalis]
c232199_g1	-	-	39947.LOC_Os06g47730.1|-56.3|COG2801|L|Retrotransposon protein	-	-	CAN83392.1|-65.4|hypothetical protein VITISV_041406 [Vitis vinifera]
c106365_g1	-	nar:Saro_1957|-54.3|K01092|E3.1.3.25, IMPA, suhB; myo-inositol-1(or 4)-monophosphatase [EC:3.1.3.25]|ko00562|Inositol phosphate metabolism;;ko04070|Phosphatidylinositol signaling system;;	-	-	-	ESZ87483.1|-62.2|inositol monophosphatase [Blastomonas sp. CACIA14H2]
c231418_g2	cellular_component:mitochondrion(GO:0005739);;cellular_component:mitochondrion(GO:0005739)	-	29760.VIT_07s0031g01400.t01|-174.7|ENOG410Z7Z7|S|Pentatricopeptide repeat-containing protein	-	P0C8Q2|PP323_ARATH|-159.0|Pentatricopeptide repeat-containing protein At4g19191, mitochondrial OS=Arabidopsis thaliana GN=PCMP-E1 PE=2 SV=1	XP_020257347.1|-221.7|pentatricopeptide repeat-containing protein At4g19191, mitochondrial [Asparagus officinalis]
c12232_g1	-	-	-	-	-	WP_064311303.1|-55.2|VIT family protein [Sphingomonas sp. TDK1]
c150213_g1	-	-	29760.VIT_01s0010g01680.t01|-56.3|ENOG410Y2WM|S|Ternary complex factor MIP1	-	-	XP_004149493.2|-57.2|PREDICTED: uncharacterized protein LOC101218879 [Cucumis sativus]
c252884_g1	-	-	-	-	-	WP_082772922.1|-74.3|cyclic nucleotide-binding protein [Methylobacterium sp. CCH5-D2]
c224599_g1	biological_process:cell cycle(GO:0007049);;molecular_function:lipid binding(GO:0008289);;cellular_component:membrane(GO:0016020);;cellular_component:membrane(GO:0016020);;biological_process:cell division(GO:0051301);;cellular_component:cytoplasm(GO:0005737);;cellular_component:cytoplasm(GO:0005737);;biological_process:transport(GO:0006810)	-	39947.LOC_Os01g65380.1|-181.0|ENOG410XRSQ|S|Transfer protein	-	Q56Z59|PATL3_ARATH|-123.2|Patellin-3 OS=Arabidopsis thaliana GN=PATL3 PE=1 SV=2	XP_010909148.1|-184.5|PREDICTED: patellin-3 [Elaeis guineensis]
c133482_g2	biological_process:regulation of cell shape(GO:0008360);;cellular_component:membrane(GO:0016020);;cellular_component:integral component of membrane(GO:0016021);;molecular_function:transferase activity(GO:0016740);;molecular_function:transferase activity, transferring glycosyl groups(GO:0016757);;biological_process:cell wall organization(GO:0071555);;molecular_function:1,3-beta-D-glucan synthase a…	-	29760.VIT_04s0044g01280.t01|-65.8|ENOG410XQ8V|S|synthase	-	Q3B724|CALS5_ARATH|-63.9|Callose synthase 5 OS=Arabidopsis thaliana GN=CALS5 PE=1 SV=1	ONK59562.1|-66.4|uncharacterized protein A4U43_C08F7740 [Asparagus officinalis]
c299316_g1	-	-	-	-	-	ACB78336.1|-66.7|PAS/PAC sensor hybrid histidine kinase [Methylobacterium populi BJ001]
c223818_g2	-	-	4081.Solyc02g079110.2.1|-149.8|ENOG410XS4K|S|WD repeat containing, antisense to TP53	-	-	XP_020094513.1|-160.2|telomerase Cajal body protein 1 [Ananas comosus]
c161437_g2	cellular_component:cytoplasm(GO:0005737);;cellular_component:cytoplasm(GO:0005737);;cellular_component:nuclear speck(GO:0016607);;cellular_component:nuclear speck(GO:0016607);;molecular_function:RNA binding(GO:0003723);;molecular_function:protein binding(GO:0005515);;cellular_component:nucleus(GO:0005634)	egu:105053914|-66.7|K14396|PABPN1, PABP2; polyadenylate-binding protein 2|ko03015|mRNA surveillance pathway;;	3694.POPTR_0012s11480.1|-63.4|ENOG4111PFV|S|Polyadenylate-binding protein	-	Q9FJN9|PABN2_ARATH|-60.9|Polyadenylate-binding protein 2 OS=Arabidopsis thaliana GN=PABN2 PE=1 SV=1	XP_020677746.1|-66.1|polyadenylate-binding protein 2-like isoform X2 [Dendrobium catenatum]
c173298_g1	biological_process:regulation of transcription, DNA-templated(GO:0006355);;biological_process:gibberellic acid mediated signaling pathway(GO:0009740);;cellular_component:nucleus(GO:0005634);;cellular_component:nucleus(GO:0005634);;biological_process:transcription, DNA-templated(GO:0006351)	-	3694.POPTR_0001s33360.1|-148.3|ENOG410Y52Z|S|DELLA protein GAI1-like	PF03514.12|GRAS|5.5e-130|GRAS domain family	Q8S4W7|GAI1_VITVI|-76.9|DELLA protein GAI1 OS=Vitis vinifera GN=GAI1 PE=2 SV=1	OAY67011.1|-152.5|DELLA protein GAI1 [Ananas comosus]
c120597_g1	-	-	-	-	-	WP_007565241.1|-80.9|penicillin-binding protein 1A [Methylobacterium sp. GXF4]
c184234_g1	-	-	29760.VIT_11s0016g04270.t01|-73.3|COG0596|S|Alpha beta hydrolase	-	-	XP_010249846.1|-73.0|PREDICTED: strigolactone esterase D14-like [Nelumbo nucifera]
c200202_g1	biological_process:transport(GO:0006810);;biological_process:protein transport(GO:0015031);;cellular_component:membrane(GO:0016020);;cellular_component:integral component of membrane(GO:0016021);;cellular_component:early endosome membrane(GO:0031901);;cellular_component:endosome(GO:0005768);;cellular_component:plasma membrane(GO:0005886);;cellular_component:plasma membrane(GO:0005886)	-	3711.Bra015345.1-P|-79.0|COG5143|U|Vesicle-associated membrane protein	-	Q9ZTW3|VA721_ARATH|-79.5|Vesicle-associated membrane protein 721 OS=Arabidopsis thaliana GN=VAMP721 PE=2 SV=1	XP_013603309.1|-77.2|PREDICTED: vesicle-associated membrane protein 721 [Brassica oleracea var. oleracea]
c207580_g4	-	-	15368.BRADI3G29820.1|-54.5|COG2801|L|Retrotransposon protein	-	-	XP_010239308.1|-53.9|PREDICTED: retrovirus-related Pol polyprotein from transposon TNT 1-94 [Brachypodium distachyon]
c196095_g1	-	-	29760.VIT_18s0117g00190.t01|-58.6|COG2801|L|Retrotransposon protein	-	-	XP_006481138.2|-83.8|PREDICTED: uncharacterized protein LOC102612481 [Citrus sinensis]
c302791_g1	biological_process:transport(GO:0006810);;biological_process:protein transport(GO:0015031)	-	4641.GSMUA_Achr4P05330_001|-10000.0|ENOG410XQBC|S|vacuolar protein sorting 41 homolog (S. cerevisiae)	-	P93231|VPS41_SOLLC|-10000.0|Vacuolar protein sorting-associated protein 41 homolog OS=Solanum lycopersicum GN=VPS41 PE=2 SV=1	XP_020259393.1|-10000.0|vacuolar protein sorting-associated protein 41 homolog isoform X2 [Asparagus officinalis]
c195458_g2	-	swi:Swit_2835|-87.2|K03628|rho; transcription termination factor Rho|ko03018|RNA degradation;;	384765.SIAM614_27388|-73.0|COG1158|K|Facilitates transcription termination by a mechanism that involves Rho binding to the nascent RNA, activation of Rho's RNA-dependent ATPase activity, and release of the mRNA from the DNA template (By similarity)	-	-	ESZ85691.1|-89.0|transcription termination factor Rho [Blastomonas sp. CACIA14H2]
c72795_g1	-	sita:101774708|-129.6|K01081|E3.1.3.5; 5'-nucleotidase [EC:3.1.3.5]|ko00230|Purine metabolism;;ko00240|Pyrimidine metabolism;;ko00760|Nicotinate and nicotinamide metabolism;;	4555.Si036385m|-130.9|ENOG410ZQJ8|F|5'-nucleotidase, cytosolic	PF05822.10|UMPH-1|4.9e-95|Pyrimidine 5'-nucleotidase (UMPH-1)	-	XP_020273882.1|-140.8|7-methylguanosine phosphate-specific 5'-nucleotidase A [Asparagus officinalis]
c195314_g2	cellular_component:cytoplasm(GO:0005737);;cellular_component:cytoplasm(GO:0005737)	-	29760.VIT_13s0064g01350.t01|-63.9|ENOG410XQUQ|S|Involved in proper cytoplasmic distribution of mitochondria (By similarity)	-	F4J5S1|CLU_ARATH|-62.8|Clustered mitochondria protein OS=Arabidopsis thaliana GN=FMT PE=2 SV=1	XP_006292320.1|-63.3|hypothetical protein CARUB_v10018531mg [Capsella rubella]
c195314_g3	cellular_component:cytoplasm(GO:0005737);;cellular_component:cytoplasm(GO:0005737)	-	3847.GLYMA15G42670.1|-115.7|ENOG410XQUQ|S|Involved in proper cytoplasmic distribution of mitochondria (By similarity)	-	F4J5S1|CLU_ARATH|-109.7|Clustered mitochondria protein OS=Arabidopsis thaliana GN=FMT PE=2 SV=1	ONK70068.1|-127.0|uncharacterized protein A4U43_C05F29910 [Asparagus officinalis]
c229740_g4	cellular_component:membrane(GO:0016020);;cellular_component:membrane(GO:0016020);;cellular_component:integral component of membrane(GO:0016021);;molecular_function:calmodulin binding(GO:0005516);;biological_process:defense response(GO:0006952);;biological_process:response to biotic stimulus(GO:0009607)	-	4641.GSMUA_Achr4P05230_001|-193.0|ENOG410YDNX|D|May be involved in modulation of pathogen defense and leaf cell death (By similarity)	PF03094.13|Mlo|3.8e-222|Mlo family	O22757|MLO8_ARATH|-159.5|MLO-like protein 8 OS=Arabidopsis thaliana GN=MLO8 PE=1 SV=2	XP_020249503.1|-208.8|MLO-like protein 9 [Asparagus officinalis]
c67245_g1	-	-	4641.GSMUA_Achr7P21690_001|-91.9|ENOG410XTFH|S|Exostosin	-	-	XP_020275300.1|-96.3|probable arabinosyltransferase ARAD1 [Asparagus officinalis]
c130283_g1	-	-	-	-	-	XP_020261630.1|-48.8|SKP1-like protein 1A [Asparagus officinalis]
c148349_g1	-	-	15368.BRADI3G28760.1|-10000.0|ENOG410XNNN|S|exportin 4	-	-	XP_020259813.1|-10000.0|exportin-4 isoform X1 [Asparagus officinalis]
c153837_g3	-	egu:105037954|-50.9|K14521|NAT10, KRE33; N-acetyltransferase 10 [EC:2.3.1.-]|ko03008|Ribosome biogenesis in eukaryotes;;	-	-	-	XP_020272072.1|-61.8|RNA cytidine acetyltransferase 1-like [Asparagus officinalis]
c210032_g1	molecular_function:oxidoreductase activity(GO:0016491);;molecular_function:dihydropyrimidine dehydrogenase (NADP+) activity(GO:0017113);;biological_process:beta-alanine biosynthetic process(GO:0019483);;biological_process:oxidation-reduction process(GO:0055114);;cellular_component:chloroplast(GO:0009507);;cellular_component:chloroplast(GO:0009507);;cellular_component:plastid(GO:0009536)	fve:101301107|-198.1|K00207|DPYD; dihydropyrimidine dehydrogenase (NADP+) [EC:1.3.1.2]|ko00770|Pantothenate and CoA biosynthesis;;ko00240|Pyrimidine metabolism;;ko00410|beta-Alanine metabolism;;	4538.ORGLA02G0272200.1|-198.0|COG0167|F|Catalyzes the conversion of dihydroorotate to orotate	-	Q9LVI9|DPYD_ARATH|-192.3|Dihydropyrimidine dehydrogenase (NADP(+)), chloroplastic OS=Arabidopsis thaliana GN=PYD1 PE=1 SV=1	XP_011084738.2|-197.7|dihydropyrimidine dehydrogenase (NADP(+)), chloroplastic [Sesamum indicum]
c203888_g1	-	-	-	-	-	XP_020276036.1|-50.3|uncharacterized protein LOC109850432 [Asparagus officinalis]
c203600_g1	cellular_component:membrane(GO:0016020);;cellular_component:membrane(GO:0016020);;cellular_component:integral component of membrane(GO:0016021);;biological_process:brassinosteroid metabolic process(GO:0016131);;molecular_function:oxidoreductase activity(GO:0016491);;biological_process:regulation of growth(GO:0040008);;molecular_function:metal ion binding(GO:0046872);;biological_process:oxidation-…	egu:105047847|-158.8|K15639|CYP734A1, BAS1; PHYB activation tagged suppressor 1 [EC:1.14.-.-]|ko00905|Brassinosteroid biosynthesis;;	15368.BRADI2G04660.1|-157.4|COG2124|Q|Cytochrome p450	-	B9X287|C7346_ORYSJ|-149.3|Cytochrome P450 734A6 OS=Oryza sativa subsp. japonica GN=CYP734A6 PE=2 SV=1	XP_010925254.1|-158.0|PREDICTED: cytochrome P450 734A6 [Elaeis guineensis]
c54278_g1	-	-	-	-	-	ALK24278.1|-59.0|replicase [Garlic virus D]
c232336_g1	-	-	4641.GSMUA_Achr4P28420_001|-85.5|COG2867|I|Cyclase dehydrase	-	-	ONK65057.1|-86.8|uncharacterized protein A4U43_C07F33060 [Asparagus officinalis]
c228572_g4	-	-	4641.GSMUA_Achr6P32760_001|-145.6|ENOG4110X8D|S|Kelch repeat-containing F-box family protein	-	-	XP_020275208.1|-174.7|uncharacterized protein LOC109849752 isoform X1 [Asparagus officinalis]
c214824_g1	-	-	3847.GLYMA02G46640.1|-84.1|ENOG410YHFC|S|Domain-Containing protein	-	-	XP_017603055.1|-91.6|PREDICTED: uncharacterized protein LOC108450103 [Gossypium arboreum]
c54134_g1	cellular_component:plastid(GO:0009536);;cellular_component:chloroplast stroma(GO:0009570);;cellular_component:thylakoid(GO:0009579);;biological_process:photosynthesis(GO:0015979);;biological_process:photosynthesis(GO:0015979);;cellular_component:membrane(GO:0016020);;molecular_function:oxidoreductase activity(GO:0016491);;biological_process:oxidation-reduction process(GO:0055114);;biological_proc…	nnu:104605546|-123.8|K02641|petH; ferredoxin--NADP+ reductase [EC:1.18.1.2]|ko00195|Photosynthesis;;	3847.GLYMA11G08230.1|-123.6|COG0369|P|Component of the sulfite reductase complex that catalyzes the 6-electron reduction of sulfite to sulfide. This is one of several activities required for the biosynthesis of L- cysteine from sulfate. The flavoprotein component catalyzes the electron flow from NADPH - FAD - FMN to the hemoprotein component (By similarity)	-	Q9FKW6|FNRL1_ARATH|-123.2|Ferredoxin--NADP reductase, leaf isozyme 1, chloroplastic OS=Arabidopsis thaliana GN=LFNR1 PE=1 SV=1	XP_020260491.1|-124.1|ferredoxin--NADP reductase, leaf isozyme, chloroplastic [Asparagus officinalis]
c203600_g2	cellular_component:membrane(GO:0016020);;cellular_component:membrane(GO:0016020);;cellular_component:integral component of membrane(GO:0016021);;biological_process:brassinosteroid metabolic process(GO:0016131);;molecular_function:oxidoreductase activity(GO:0016491);;biological_process:regulation of growth(GO:0040008);;molecular_function:metal ion binding(GO:0046872);;biological_process:oxidation-…	mus:103975323|-61.7|K15639|CYP734A1, BAS1; PHYB activation tagged suppressor 1 [EC:1.14.-.-]|ko00905|Brassinosteroid biosynthesis;;	4513.MLOC_53497.1|-61.3|COG2124|Q|Cytochrome p450	-	B9X287|C7346_ORYSJ|-58.5|Cytochrome P450 734A6 OS=Oryza sativa subsp. japonica GN=CYP734A6 PE=2 SV=1	XP_009388531.1|-60.8|PREDICTED: cytochrome P450 734A6-like [Musa acuminata subsp. malaccensis]
c223287_g6	biological_process:protein ubiquitination(GO:0016567);;biological_process:protein ubiquitination(GO:0016567);;molecular_function:transferase activity(GO:0016740);;molecular_function:metal ion binding(GO:0046872);;cellular_component:membrane(GO:0016020);;cellular_component:membrane(GO:0016020);;cellular_component:integral component of membrane(GO:0016021)	-	39947.LOC_Os05g05280.1|-153.8|ENOG41121N2|O|zinc ion binding	-	Q8GYT9|SIS3_ARATH|-136.2|E3 ubiquitin-protein ligase SIS3 OS=Arabidopsis thaliana GN=SIS3 PE=2 SV=2	XP_020099867.1|-152.2|E3 ubiquitin-protein ligase SIS3 isoform X4 [Ananas comosus]
c221112_g3	-	-	29760.VIT_13s0067g02190.t01|-150.6|ENOG410ZU39|S|Protein of unknown function (DUF2985)	-	-	XP_020243639.1|-165.7|uncharacterized protein LOC109821894, partial [Asparagus officinalis]
c181035_g1	biological_process:oxidation-reduction process(GO:0055114);;biological_process:carbohydrate metabolic process(GO:0005975);;biological_process:galactose metabolic process(GO:0006012);;molecular_function:oxidoreductase activity(GO:0016491)	mus:103979808|-142.4|K17744|GalDH; L-galactose dehydrogenase [EC:1.1.1.316]|ko00053|Ascorbate and aldarate metabolism;;	4641.GSMUA_Achr3P30610_001|-143.7|COG0667|C|Aldo keto reductase	-	O81884|GALDH_ARATH|-135.7|L-galactose dehydrogenase OS=Arabidopsis thaliana GN=LGALDH PE=1 SV=1	XP_020257864.1|-146.3|L-galactose dehydrogenase [Asparagus officinalis]
c209336_g1	-	-	-	-	-	WP_066213926.1|-73.2|primosomal protein N' [Blastomonas sp. CCH5-A3]
c228572_g6	molecular_function:protein binding(GO:0005515);;molecular_function:ATP binding(GO:0005524);;cellular_component:cytoplasm(GO:0005737);;cellular_component:cytoplasm(GO:0005737);;molecular_function:hydrolase activity(GO:0016787);;biological_process:gene silencing by RNA(GO:0031047);;biological_process:posttranscriptional gene silencing by RNA(GO:0035194);;molecular_function:nucleotide binding(GO:000…	-	4641.GSMUA_Achr3P25460_001|-293.3|COG1112|L|Helicase	-	Q8GYD9|SDE3_ARATH|-255.8|Probable RNA helicase SDE3 OS=Arabidopsis thaliana GN=SDE3 PE=1 SV=1	XP_020244565.1|-10000.0|probable RNA helicase SDE3 [Asparagus officinalis]
c220088_g1	-	-	4513.MLOC_62638.1|-67.4|ENOG4111HC0|U|StAR-related lipid transfer (START) domain containing	-	-	KMZ75727.1|-61.5|Polyketide cyclase/dehydrase and lipid transport-like protein [Zostera marina]
c209336_g2	-	ssy:SLG_37270|-100.0|K04066|priA; primosomal protein N' (replication factor Y) (superfamily II helicase) [EC:3.6.4.-]|ko03440|Homologous recombination;;	384765.SIAM614_03321|-77.1|COG1198|L|Primosomal protein n'	-	-	WP_060978104.1|-133.7|MULTISPECIES: primosomal protein N' [Proteobacteria]
c214293_g1	-	-	-	-	-	XP_020274311.1|-48.4|PP2A regulatory subunit TAP46 [Asparagus officinalis]
c213512_g1	-	-	3711.Bra010376.1-P|-70.9|ENOG410YI4W|S|Hydroxyproline-rich glycoprotein family protein	-	-	XP_020268673.1|-101.6|mediator of RNA polymerase II transcription subunit 15-like [Asparagus officinalis]
c198181_g2	-	-	-	-	-	XP_020599111.1|-61.4|uncharacterized protein LOC110038577 isoform X1 [Phalaenopsis equestris]
c92475_g1	-	-	4641.GSMUA_Achr3P12420_001|-62.8|ENOG41127HC|S|RNA recognition motif containing protein	-	-	XP_008790541.1|-62.9|PREDICTED: RNA-binding protein 1 isoform X2 [Phoenix dactylifera]
c214293_g2	-	-	3847.GLYMA04G41350.1|-117.3|ENOG41110HD|S|Immunoglobulin (CD79A) binding protein 1	-	Q2QY04|TAP46_ORYSJ|-116.8|PP2A regulatory subunit TAP46 OS=Oryza sativa subsp. japonica GN=TAP46 PE=2 SV=1	XP_020274311.1|-119.4|PP2A regulatory subunit TAP46 [Asparagus officinalis]
c169259_g2	molecular_function:transferase activity(GO:0016740);;molecular_function:nucleotide binding(GO:0000166);;molecular_function:ATP binding(GO:0005524);;biological_process:protein ubiquitination(GO:0016567)	-	59689.Al_scaffold_0002_69|-83.0|COG5078|O|ubiquitin-conjugating enzyme	-	Q94F47|UBC28_ARATH|-84.1|Ubiquitin-conjugating enzyme E2 28 OS=Arabidopsis thaliana GN=UBC28 PE=2 SV=1	XP_020273767.1|-81.0|ubiquitin-conjugating enzyme E2 28 [Asparagus officinalis]
c315709_g1	-	-	-	-	-	OGA84258.1|-59.1|DNA-binding protein YbiB [Burkholderiales bacterium RIFCSPHIGHO2_01_FULL_63_240]
c220088_g4	-	-	4533.OB04G10780.1|-99.2|ENOG4111HC0|U|StAR-related lipid transfer (START) domain containing	-	-	XP_020260787.1|-108.0|uncharacterized protein LOC109837108 [Asparagus officinalis]
c218941_g1	biological_process:metabolic process(GO:0008152);;molecular_function:hydrolase activity(GO:0016787);;molecular_function:hydrolase activity, acting on glycosyl bonds(GO:0016798);;cellular_component:extracellular region(GO:0005576);;cellular_component:proteinaceous extracellular matrix(GO:0005578);;cellular_component:proteinaceous extracellular matrix(GO:0005578)	-	15368.BRADI3G59020.1|-274.0|COG1472|G|hydrolase family 3	-	Q9SGZ5|BXL7_ARATH|-268.6|Probable beta-D-xylosidase 7 OS=Arabidopsis thaliana GN=BXL7 PE=2 SV=2	XP_020255674.1|-10000.0|probable beta-D-xylosidase 7 [Asparagus officinalis]
c6695_g2	-	-	-	-	-	WP_017484551.1|-52.9|ATP-binding protein [Methylobacterium sp. MB200]
c218941_g2	-	-	-	-	-	XP_020269132.1|-177.2|WPP domain-associated protein-like [Asparagus officinalis]
c184659_g1	-	-	-	-	-	WP_060979342.1|-183.6|MULTISPECIES: chemotaxis protein CheA [Proteobacteria]
c264408_g1	-	shz:shn_26080|-64.5|K09969|aapJ, bztA; general L-amino acid transport system substrate-binding protein|ko02010|ABC transporters;;	-	-	-	WP_050745151.1|-63.6|MULTISPECIES: amino acid ABC transporter substrate-binding protein [Shinella]
c201120_g1	cellular_component:endoplasmic reticulum lumen(GO:0005788);;molecular_function:nucleotide binding(GO:0000166);;molecular_function:ATP binding(GO:0005524);;cellular_component:endoplasmic reticulum(GO:0005783)	pda:103701937|-10000.0|K09486|HYOU1; hypoxia up-regulated 1|ko04141|Protein processing in endoplasmic reticulum;;	4641.GSMUA_Achr6P09420_001|-10000.0|COG0443|O|Heat shock protein	PF00012.18|HSP70|3.2e-87|Hsp70 protein	F4JMJ1|HSP7R_ARATH|-10000.0|Heat shock 70 kDa protein 17 OS=Arabidopsis thaliana GN=HSP70-17 PE=2 SV=1	XP_020268796.1|-10000.0|heat shock 70 kDa protein 17 isoform X1 [Asparagus officinalis]
c196232_g1	-	-	-	-	-	WP_060979826.1|-86.5|MULTISPECIES: chemotaxis protein [Proteobacteria]
c131732_g1	cellular_component:nucleus(GO:0005634);;cellular_component:nucleus(GO:0005634);;cellular_component:cytoplasm(GO:0005737);;cellular_component:cytoplasm(GO:0005737);;molecular_function:nucleotide binding(GO:0000166);;cellular_component:proteasome complex(GO:0000502);;molecular_function:ATP binding(GO:0005524)	mus:103973835|-238.3|K03061|PSMC2, RPT1; 26S proteasome regulatory subunit T1|ko03050|Proteasome;;	4641.GSMUA_AchrUn_randomP12540_001|-239.5|COG1222|O|26S protease regulatory subunit	-	O64982|PRS7_PRUPE|-240.3|26S protease regulatory subunit 7 OS=Prunus persica GN=RPT1 PE=2 SV=1	XP_020241728.1|-238.3|26S protease regulatory subunit 7-like isoform X1 [Asparagus officinalis]
c212344_g2	-	-	-	PF04690.11|YABBY|3.4e-68|YABBY protein	-	BAF56419.1|-59.7|YABBY2 like protein [Ruscus aculeatus]
c205830_g1	-	-	4641.GSMUA_Achr9P08430_001|-227.7|COG1041|L|RNA methylase	-	-	XP_020245997.1|-231.8|tRNA (guanine(10)-N2)-methyltransferase homolog isoform X1 [Asparagus officinalis]
c206693_g1	cellular_component:membrane(GO:0016020);;cellular_component:integral component of membrane(GO:0016021);;biological_process:iron ion homeostasis(GO:0055072);;biological_process:transport(GO:0006810);;biological_process:ion transport(GO:0006811);;cellular_component:membrane(GO:0016020)	-	3847.GLYMA06G13820.1|-283.6|COG1297|S|oligo-peptide transporter	PF03169.13|OPT|1.2e-136|OPT oligopeptide transporter protein	Q2EF88|YSL3_ARATH|-279.4|Metal-nicotianamine transporter YSL3 OS=Arabidopsis thaliana GN=YSL3 PE=2 SV=1	XP_020243419.1|-300.6|metal-nicotianamine transporter YSL3-like [Asparagus officinalis]
c280301_g1	-	-	-	-	-	WP_048467384.1|-61.2|LLM class flavin-dependent oxidoreductase [Methylobacterium aquaticum]
c206219_g1	cellular_component:integral component of membrane(GO:0016021);;molecular_function:transferase activity(GO:0016740);;molecular_function:transferase activity, transferring acyl groups(GO:0016746);;molecular_function:3-oxo-arachidoyl-CoA synthase activity(GO:0102336);;molecular_function:3-oxo-cerotoyl-CoA synthase activity(GO:0102337);;molecular_function:3-oxo-lignoceronyl-CoA synthase activity(GO:0…	egu:105053416|-236.8|K15397|KCS; 3-ketoacyl-CoA synthase [EC:2.3.1.199]|ko00062|Fatty acid elongation;;	29760.VIT_05s0020g04540.t01|-234.2|ENOG410Y5VH|I|3-ketoacyl-coa synthase	PF08392.10|FAE1_CUT1_RppA|2.8e-141|FAE1/Type III polyketide synthase-like protein	O48780|KCS11_ARATH|-224.5|3-ketoacyl-CoA synthase 11 OS=Arabidopsis thaliana GN=KCS11 PE=1 SV=1	OWM71623.1|-236.2|hypothetical protein CDL15_Pgr005810 [Punica granatum]
c165753_g1	-	-	-	-	-	WP_066274166.1|-51.4|3-keto-5-aminohexanoate cleavage protein [Blastomonas sp. CCH1-A6]
c210313_g1	-	-	15368.BRADI1G23580.1|-175.5|COG2211|G|symporter activity	-	-	XP_020264499.1|-202.6|major facilitator superfamily domain-containing protein 12-like isoform X1 [Asparagus officinalis]
c211032_g1	molecular_function:metal ion binding(GO:0046872);;molecular_function:lyase activity(GO:0016829);;molecular_function:pectate lyase activity(GO:0030570);;biological_process:pectin catabolic process(GO:0045490)	egu:105043158|-220.5|K01728|pel; pectate lyase [EC:4.2.2.2]|ko00040|Pentose and glucuronate interconversions;;	15368.BRADI5G01135.1|-210.5|COG3866|G|pectate lyase activity	-	Q944R1|PLY15_ARATH|-194.3|Probable pectate lyase 15 OS=Arabidopsis thaliana GN=At4g13710 PE=2 SV=1	XP_010918895.1|-219.7|PREDICTED: probable pectate lyase 8 isoform X1 [Elaeis guineensis]
c176833_g1	molecular_function:protein binding(GO:0005515);;molecular_function:ATP binding(GO:0005524);;cellular_component:nucleus(GO:0005634);;cellular_component:nucleus(GO:0005634);;cellular_component:spliceosomal complex(GO:0005681);;biological_process:mRNA processing(GO:0006397);;biological_process:RNA splicing(GO:0008380);;molecular_function:hydrolase activity(GO:0016787);;molecular_function:nucleotide …	nnu:104606881|-94.3|K12854|SNRNP200, BRR2; pre-mRNA-splicing helicase BRR2 [EC:3.6.4.13]|ko03040|Spliceosome;;	29760.VIT_05s0102g00480.t01|-95.2|COG1204|L|helicase	-	Q9SYP1|DEXHC_ARATH|-89.4|DExH-box ATP-dependent RNA helicase DExH12 OS=Arabidopsis thaliana GN=BRR2A PE=1 SV=1	XP_020276794.1|-95.2|DExH-box ATP-dependent RNA helicase DExH12-like [Asparagus officinalis]
c229490_g2	molecular_function:nucleotide binding(GO:0000166);;molecular_function:ATP binding(GO:0005524);;cellular_component:microtubule(GO:0005874)	-	4641.GSMUA_AchrUn_randomP19350_001|-262.2|COG5059|Z|Kinesin family member	PF00225.21|Kinesin|1e-103|Kinesin motor domain	B9FL70|KN14K_ORYSJ|-254.4|Kinesin-like protein KIN-14K OS=Oryza sativa subsp. japonica GN=KIN14K PE=2 SV=1	XP_010915403.1|-296.1|PREDICTED: kinesin-like protein KIN-14J [Elaeis guineensis]
c43479_g1	-	-	-	-	-	ONK77315.1|-49.2|uncharacterized protein A4U43_C02F5270 [Asparagus officinalis]
c176833_g2	-	ppp:PHYPADRAFT_205535|-50.5|K12854|SNRNP200, BRR2; pre-mRNA-splicing helicase BRR2 [EC:3.6.4.13]|ko03040|Spliceosome;;	3218.PP1S28_172V6.1|-51.7|COG1204|L|helicase	-	-	XP_020276794.1|-50.6|DExH-box ATP-dependent RNA helicase DExH12-like [Asparagus officinalis]
c269162_g1	cellular_component:Golgi apparatus(GO:0005794);;biological_process:transport(GO:0006810);;biological_process:protein transport(GO:0015031);;biological_process:vesicle-mediated transport(GO:0016192);;molecular_function:nucleotide binding(GO:0000166);;molecular_function:GTP binding(GO:0005525);;cellular_component:Golgi apparatus(GO:0005794)	-	4641.GSMUA_Achr5P03700_001|-102.1|COG1100|S|GTP-binding Protein	PF00025.19|Arf|5.1e-70|ADP-ribosylation factor family	O48649|ARF1_SALBA|-63.4|ADP-ribosylation factor 1 OS=Salix bakko GN=ARF1 PE=2 SV=3	XP_008788785.1|-102.5|PREDICTED: ADP-ribosylation factor 1-like 2 isoform X1 [Phoenix dactylifera]
c204662_g1	molecular_function:DNA binding(GO:0003677);;molecular_function:RNA binding(GO:0003723);;molecular_function:metal ion binding(GO:0046872)	-	29760.VIT_12s0035g01790.t01|-90.3|ENOG410Z5PX|S|auxiliary factor	-	Q9SY74|C3H5_ARATH|-75.6|Zinc finger CCCH domain-containing protein 5 OS=Arabidopsis thaliana GN=At1g10320 PE=2 SV=2	XP_020253770.1|-93.8|zinc finger CCCH domain-containing protein 16 [Asparagus officinalis]
c229490_g3	molecular_function:nucleotide binding(GO:0000166);;molecular_function:ATP binding(GO:0005524);;cellular_component:microtubule(GO:0005874)	-	39947.LOC_Os01g54080.1|-268.7|COG5059|Z|Kinesin family member	PF00225.21|Kinesin|3.5e-104|Kinesin motor domain	Q5JKW1|KN14C_ORYSJ|-269.9|Kinesin-like protein KIN-14C OS=Oryza sativa subsp. japonica GN=KIN14C PE=2 SV=1	XP_009761310.1|-279.9|PREDICTED: kinesin-4-like isoform X1 [Nicotiana sylvestris]
c297117_g1	-	-	-	-	-	WP_066046236.1|-58.6|GGDEF domain-containing protein [Blastomonas sp. CCH15-G10]
c215886_g1	cellular_component:chromosome(GO:0005694);;cellular_component:chromosome(GO:0005694);;biological_process:DNA replication(GO:0006260);;biological_process:DNA repair(GO:0006281);;biological_process:transcription, DNA-templated(GO:0006351);;biological_process:regulation of transcription, DNA-templated(GO:0006355);;biological_process:cellular response to DNA damage stimulus(GO:0006974);;molecular_fun…	-	29760.VIT_14s0108g00040.t01|-303.4|COG5165|B|Component of the FACT complex, a general chromatin factor that acts to reorganize nucleosomes. The FACT complex is involved in multiple processes that require DNA as a template such as mRNA elongation, DNA replication and DNA repair. During transcription elongation the FACT complex acts as a histone chaperone that both destabilizes and restores nucleos…	PF03531.12|SSrecog|2.7e-77|Structure-specific recognition protein (SSRP1)	O04235|SSRP1_VICFA|-283.3|FACT complex subunit SSRP1 OS=Vicia faba GN=SSRP1 PE=2 SV=1	XP_010925368.1|-303.1|PREDICTED: FACT complex subunit SSRP1 [Elaeis guineensis]
c215742_g1	cellular_component:membrane(GO:0016020);;cellular_component:integral component of membrane(GO:0016021);;molecular_function:oxidoreductase activity(GO:0016491);;biological_process:abscisic acid catabolic process(GO:0046345);;molecular_function:metal ion binding(GO:0046872);;biological_process:oxidation-reduction process(GO:0055114);;molecular_function:monooxygenase activity(GO:0004497);;molecular_…	egu:105053512|-197.7|K09843|E1.14.13.93; (+)-abscisic acid 8'-hydroxylase [EC:1.14.13.93]|ko00906|Carotenoid biosynthesis;;	4641.GSMUA_Achr4P21760_001|-195.1|COG2124|Q|Cytochrome p450	PF00067.20|p450|6e-71|Cytochrome P450	Q949P1|ABAH1_ARATH|-186.3|Abscisic acid 8'-hydroxylase 1 OS=Arabidopsis thaliana GN=CYP707A1 PE=2 SV=1	XP_020261740.1|-200.1|abscisic acid 8'-hydroxylase 1-like [Asparagus officinalis]
c129868_g1	-	maqu:Maq22A_c21250|-68.6|K01784|galE, GALE; UDP-glucose 4-epimerase [EC:5.1.3.2]|ko00520|Amino sugar and nucleotide sugar metabolism;;ko00052|Galactose metabolism;;	-	-	-	WP_048465648.1|-74.6|NAD-dependent dehydratase [Methylobacterium aquaticum]
c267131_g1	biological_process:transport(GO:0006810);;biological_process:ion transport(GO:0006811);;molecular_function:porin activity(GO:0015288);;cellular_component:membrane(GO:0016020);;cellular_component:integral component of membrane(GO:0016021);;cellular_component:pore complex(GO:0046930);;cellular_component:mitochondrion(GO:0005739);;cellular_component:mitochondrial outer membrane(GO:0005741);;cellular…	-	4558.Sb02g022910.1|-112.9|ENOG410ZBK1|U|voltage-dependent anion channel	PF01459.20|Porin_3|8.8e-68|Eukaryotic porin	P46274|VDAC1_WHEAT|-108.7|Mitochondrial outer membrane porin OS=Triticum aestivum GN=VDAC1 PE=2 SV=1	XP_020242614.1|-112.8|mitochondrial outer membrane protein porin 1-like [Asparagus officinalis]
c213937_g1	-	-	-	-	-	XP_020273439.1|-63.7|protein REVEILLE 2-like [Asparagus officinalis]
c214574_g1	-	-	29760.VIT_03s0063g00930.t01|-200.5|ENOG410Z7Z7|S|Pentatricopeptide repeat-containing protein	-	Q9FIX3|PP407_ARATH|-192.9|Pentatricopeptide repeat-containing protein At5g39710 OS=Arabidopsis thaliana GN=EMB2745 PE=2 SV=1	XP_020255453.1|-231.9|pentatricopeptide repeat-containing protein At5g39710 [Asparagus officinalis]
c232086_g1	-	egu:105060095|-83.9|K14018|PLAA, DOA1, UFD3; phospholipase A-2-activating protein|ko04141|Protein processing in endoplasmic reticulum;;	4641.GSMUA_Achr5P01880_001|-81.7|ENOG410XS67|S|Phospholipase A2-activating protein	-	-	XP_010942012.1|-83.1|PREDICTED: phospholipase A-2-activating protein isoform X2 [Elaeis guineensis]
c226291_g1	cellular_component:nucleus(GO:0005634);;cellular_component:nucleus(GO:0005634)	-	29760.VIT_11s0016g00420.t01|-231.1|ENOG410YR3Z|S|IK cytokine, down-regulator of HLA II	PF07808.11|RED_N|5.8e-77|RED-like protein N-terminal region	O48713|SMU2_ARATH|-194.9|Suppressor of mec-8 and unc-52 protein homolog 2 OS=Arabidopsis thaliana GN=SMU2 PE=1 SV=1	XP_020253675.1|-251.1|suppressor of mec-8 and unc-52 protein homolog 2 [Asparagus officinalis]
c40692_g1	-	-	-	-	-	WP_048434530.1|-55.5|branched-chain amino acid ABC transporter permease [Methylobacterium platani]
c174497_g1	-	-	4641.GSMUA_Achr11P22900_001|-93.2|ENOG410ZBCX|O|ubiquitin-fold modifier conjugating enzyme 1	PF08694.9|UFC1|1.3e-82|Ubiquitin-fold modifier-conjugating enzyme 1	Q9SXC8|UFC1_ARATH|-93.0|Ubiquitin-fold modifier-conjugating enzyme 1 OS=Arabidopsis thaliana GN=At1g27530 PE=2 SV=1	XP_004299833.1|-91.9|PREDICTED: ubiquitin-fold modifier-conjugating enzyme 1 [Fragaria vesca subsp. vesca]
c232086_g4	-	egu:105060095|-236.5|K14018|PLAA, DOA1, UFD3; phospholipase A-2-activating protein|ko04141|Protein processing in endoplasmic reticulum;;	4641.GSMUA_Achr5P01880_001|-228.7|ENOG410XS67|S|Phospholipase A2-activating protein	-	-	XP_020688367.1|-236.5|phospholipase A-2-activating protein [Dendrobium catenatum]
c231305_g5	-	pxb:103965262|-90.1|K11423|SETD2, SET2; histone-lysine N-methyltransferase SETD2 [EC:2.1.1.43]|ko00310|Lysine degradation;;	3847.GLYMA09G34850.1|-63.9|COG1501|G|hydrolase, family 31	-	-	XP_009376565.1|-89.3|PREDICTED: uncharacterized protein LOC103965262 isoform X1 [Pyrus x bretschneideri]
c132732_g1	cellular_component:extracellular region(GO:0005576);;molecular_function:oxidoreductase activity(GO:0016491);;molecular_function:metal ion binding(GO:0046872);;biological_process:oxidation-reduction process(GO:0055114);;molecular_function:peroxidase activity(GO:0004601);;molecular_function:peroxidase activity(GO:0004601);;cellular_component:extracellular region(GO:0005576)	vra:106763008|-69.9|K00430|E1.11.1.7; peroxidase [EC:1.11.1.7]|ko00940|Phenylpropanoid biosynthesis;;	3847.GLYMA09G28460.1|-69.9|ENOG410XUVZ|G|peroxidase	-	Q9SZB9|PER47_ARATH|-67.1|Peroxidase 47 OS=Arabidopsis thaliana GN=PER47 PE=2 SV=2	AEX55230.1|-98.9|peroxidase ATP17a-like protein [Allium sativum]
c230137_g1	cellular_component:cytoplasm(GO:0005737);;cellular_component:cytoplasm(GO:0005737);;cellular_component:cytoplasm(GO:0005737);;cellular_component:endoplasmic reticulum(GO:0005783);;cellular_component:endoplasmic reticulum(GO:0005783);;biological_process:mRNA processing(GO:0006397);;biological_process:mRNA catabolic process(GO:0006402);;biological_process:positive regulation of gibberellin biosynth…	-	3847.GLYMA06G17050.3|-240.6|COG1525|L|nuclease	-	Q9FLT0|TSN2_ARATH|-10000.0|Ribonuclease TUDOR 2 OS=Arabidopsis thaliana GN=TSN2 PE=1 SV=1	XP_020111425.1|-252.4|ribonuclease TUDOR 2-like [Ananas comosus]
c223849_g1	-	-	-	-	-	XP_020271550.1|-54.0|probable WRKY transcription factor 70 [Asparagus officinalis]
c173041_g1	biological_process:transcription, DNA-templated(GO:0006351);;biological_process:regulation of transcription, DNA-templated(GO:0006355);;molecular_function:DNA binding(GO:0003677);;cellular_component:nucleus(GO:0005634);;cellular_component:nucleus(GO:0005634)	-	4641.GSMUA_Achr6P17720_001|-82.9|ENOG410YE96|S|Nac domain-containing protein	-	Q7F2L3|NAC48_ORYSJ|-90.6|NAC domain-containing protein 48 OS=Oryza sativa subsp. japonica GN=NAC48 PE=2 SV=1	XP_010910754.1|-108.5|PREDICTED: NAC domain-containing protein 48-like [Elaeis guineensis]
c224342_g3	-	-	39947.LOC_Os05g42448.1|-64.5|COG2801|L|Retrotransposon protein	PF07727.12|RVT_2|1.4e-63|Reverse transcriptase (RNA-dependent DNA polymerase)	-	CAN73924.1|-66.8|hypothetical protein VITISV_041509 [Vitis vinifera]
c211457_g1	-	-	4641.GSMUA_Achr5P07770_001|-59.2|COG0515|T|Serine Threonine protein kinase	-	-	ONK55464.1|-73.8|uncharacterized protein A4U43_UnF2880 [Asparagus officinalis]
c200233_g2	molecular_function:hydrolase activity(GO:0016787);;molecular_function:hydrolase activity, acting on glycosyl bonds(GO:0016798);;cellular_component:apoplast(GO:0048046);;cellular_component:apoplast(GO:0048046);;molecular_function:beta-galactosidase activity(GO:0004565);;cellular_component:extracellular region(GO:0005576);;biological_process:metabolic process(GO:0008152)	-	-	-	P45582|BGAL_ASPOF|-52.7|Beta-galactosidase OS=Asparagus officinalis PE=2 SV=1	P45582.1|-49.2|RecName: Full=Beta-galactosidase; Short=Lactase; Flags: Precursor
c130701_g1	molecular_function:oxidoreductase activity(GO:0016491);;biological_process:covalent chromatin modification(GO:0016569);;biological_process:oxidation-reduction process(GO:0055114)	-	4577.GRMZM2G019863_P01|-294.8|ENOG410XSNC|S|amine oxidase	PF01593.22|Amino_oxidase|9.9e-89|Flavin containing amine oxidoreductase	Q01H90|LDL3_ORYSI|-294.6|Lysine-specific histone demethylase 1 homolog 3 OS=Oryza sativa subsp. indica GN=B0103C08-B0602B01.13 PE=3 SV=1	XP_020260921.1|-10000.0|LOW QUALITY PROTEIN: lysine-specific histone demethylase 1 homolog 3-like [Asparagus officinalis]
c160012_g1	-	-	-	-	-	SDO50923.1|-58.4|Sterol desaturase/sphingolipid hydroxylase, fatty acid hydroxylase superfamily [Phyllobacterium sp. OV277]
c250740_g1	-	-	39946.BGIOSGA038735-PA|-212.5|COG0402|F|deaminase	-	-	ENB88764.1|-263.4|amidohydrolase family protein [Escherichia coli P0298942.9]
c200233_g3	molecular_function:hydrolase activity(GO:0016787);;molecular_function:hydrolase activity, acting on glycosyl bonds(GO:0016798);;cellular_component:apoplast(GO:0048046);;cellular_component:apoplast(GO:0048046);;molecular_function:beta-galactosidase activity(GO:0004565);;cellular_component:extracellular region(GO:0005576);;biological_process:metabolic process(GO:0008152)	-	39947.LOC_Os01g39830.1|-174.2|COG1874|G|beta-galactosidase	-	P45582|BGAL_ASPOF|-195.4|Beta-galactosidase OS=Asparagus officinalis PE=2 SV=1	XP_020268843.1|-195.5|beta-galactosidase-like [Asparagus officinalis]
c108482_g1	-	stax:MC45_07885|-73.5|K15634|gpmB; probable phosphoglycerate mutase [EC:5.4.2.12]|ko00260|Glycine, serine and threonine metabolism;;ko01200|Carbon metabolism;;ko01230|Biosynthesis of amino acids;;ko00010|Glycolysis / Gluconeogenesis;;	-	-	-	WP_060977100.1|-122.1|MULTISPECIES: histidine phosphatase family protein [Proteobacteria]
c204943_g2	cellular_component:cytoplasm(GO:0005737);;cellular_component:cytoplasm(GO:0005737);;biological_process:leaf morphogenesis(GO:0009965);;biological_process:floral organ abscission(GO:0010227);;biological_process:bract formation(GO:0010434);;biological_process:protein ubiquitination(GO:0016567);;molecular_function:protein binding(GO:0005515);;cellular_component:nucleus(GO:0005634);;cellular_componen…	vvi:100241869|-172.6|K14508|NPR1; regulatory protein NPR1|ko04075|Plant hormone signal transduction;;	29760.VIT_08s0007g05740.t01|-173.9|COG0666|S|Ankyrin Repeat	-	Q9M1I7|NPR6_ARATH|-160.9|Regulatory protein NPR6 OS=Arabidopsis thaliana GN=NPR6 PE=1 SV=1	OAY40262.1|-172.8|hypothetical protein MANES_09G008400 [Manihot esculenta]
c137012_g1	-	-	-	-	-	WP_060980282.1|-92.8|MULTISPECIES: peptidase M61 [Proteobacteria]
c227740_g2	-	-	4641.GSMUA_Achr2P15470_001|-58.9|ENOG410XRBQ|S|WAS protein family, member	-	-	XP_020263914.1|-73.8|protein SCAR3-like [Asparagus officinalis]
c175946_g1	biological_process:transport(GO:0006810);;biological_process:ion transport(GO:0006811);;molecular_function:porin activity(GO:0015288);;cellular_component:membrane(GO:0016020);;cellular_component:integral component of membrane(GO:0016021);;cellular_component:pore complex(GO:0046930);;cellular_component:mitochondrion(GO:0005739);;cellular_component:mitochondrial outer membrane(GO:0005741);;cellular…	-	4641.GSMUA_Achr8P14200_001|-95.8|ENOG410ZBK1|U|voltage-dependent anion channel	-	Q10S27|VDAC6_ORYSJ|-91.4|Mitochondrial outer membrane protein porin 6 OS=Oryza sativa subsp. japonica GN=VDAC6 PE=2 SV=1	XP_020246496.1|-109.1|mitochondrial outer membrane protein porin 6 [Asparagus officinalis]
c284987_g1	cellular_component:chloroplast inner membrane(GO:0009706);;cellular_component:membrane(GO:0016020);;molecular_function:oxidoreductase activity(GO:0016491);;biological_process:oxidation-reduction process(GO:0055114);;cellular_component:chloroplast(GO:0009507);;cellular_component:plastid inner membrane(GO:0009528);;cellular_component:plastid(GO:0009536)	-	4081.Solyc09g059030.2.1|-128.1|COG0604|C|alcohol dehydrogenase	-	Q9SV68|QORH_ARATH|-123.3|Chloroplast envelope quinone oxidoreductase homolog OS=Arabidopsis thaliana GN=CEQORH PE=1 SV=1	XP_020572104.1|-133.0|putative quinone-oxidoreductase homolog, chloroplastic [Phalaenopsis equestris]
c70877_g1	-	-	-	-	-	WP_066275311.1|-74.7|hypothetical protein [Blastomonas sp. CCH1-A6]
c221287_g1	-	-	-	-	-	XP_020254643.1|-48.2|uncharacterized protein LOC109831676 isoform X1 [Asparagus officinalis]
c203775_g1	-	-	-	-	-	XP_018816630.1|-49.6|PREDICTED: uncharacterized protein LOC108988006 [Juglans regia]
c187889_g1	-	-	-	-	-	WP_066274290.1|-120.5|arabinose ABC transporter permease [Blastomonas sp. CCH1-A6]
c285006_g1	-	-	4641.GSMUA_Achr8P25810_001|-100.1|ENOG4111TAK|S|BSD domain	-	-	XP_020264372.1|-114.2|uncharacterized protein LOC109840223 isoform X1 [Asparagus officinalis]
c220506_g1	cellular_component:plasma membrane(GO:0005886);;cellular_component:plasma membrane(GO:0005886);;biological_process:multicellular organism development(GO:0007275);;cellular_component:membrane(GO:0016020);;cellular_component:integral component of membrane(GO:0016021);;molecular_function:kinase activity(GO:0016301);;biological_process:phosphorylation(GO:0016310);;molecular_function:transferase activ…	-	3694.POPTR_0004s23260.1|-10000.0|COG4886|S|leucine Rich Repeat	-	O65440|BAME3_ARATH|-289.3|Leucine-rich repeat receptor-like serine/threonine-protein kinase BAM3 OS=Arabidopsis thaliana GN=BAM3 PE=2 SV=3	XP_010243895.1|-10000.0|PREDICTED: leucine-rich repeat receptor-like serine/threonine-protein kinase BAM1 isoform X1 [Nelumbo nucifera]
c81813_g1	-	-	-	-	-	WP_066044110.1|-54.2|MULTISPECIES: transcriptional repressor [Proteobacteria]
c214999_g1	-	-	-	-	-	XP_020248342.1|-108.2|epidermal growth factor receptor substrate 15-like 1 [Asparagus officinalis]
c214711_g1	-	-	4555.Si004376m|-153.0|ENOG410Z7Z7|S|Pentatricopeptide repeat-containing protein	-	B3H4P1|PP450_ARATH|-145.2|Pentatricopeptide repeat-containing protein At5g66631 OS=Arabidopsis thaliana GN=At5g66631 PE=2 SV=1	XP_019709437.1|-183.8|PREDICTED: LOW QUALITY PROTEIN: pentatricopeptide repeat-containing protein At5g66631 [Elaeis guineensis]
c198887_g1	-	-	4641.GSMUA_Achr10P19990_001|-153.9|ENOG410XSI4|S|AAR2 splicing factor homolog (S. cerevisiae)	PF05282.9|AAR2|2.1e-94|AAR2 protein	-	XP_020251812.1|-162.3|protein AAR2 homolog [Asparagus officinalis]
c198969_g1	-	meta:Y590_11470|-99.6|K01915|glnA, GLUL; glutamine synthetase [EC:6.3.1.2]|ko00910|Nitrogen metabolism;;ko00630|Glyoxylate and dicarboxylate metabolism;;ko01230|Biosynthesis of amino acids;;ko00250|Alanine, aspartate and glutamate metabolism;;ko00220|Arginine biosynthesis;;	384765.SIAM614_15355|-71.6|COG0174|E|glutamine synthetase	-	-	WP_066920654.1|-100.4|glutamine synthetase [Methylobacterium sp. CCH5-D2]
c232223_g1	molecular_function:nuclease activity(GO:0004518);;molecular_function:endonuclease activity(GO:0004519);;biological_process:proteolysis(GO:0006508);;molecular_function:peptidase activity(GO:0008233);;molecular_function:transferase activity(GO:0016740);;molecular_function:nucleotidyltransferase activity(GO:0016779);;molecular_function:hydrolase activity(GO:0016787);;molecular_function:metal ion bin…	-	4081.Solyc11g062200.1.1|-10000.0|ENOG410XS4D|S|Retrotransposon protein	PF07727.12|RVT_2|8.6e-97|Reverse transcriptase (RNA-dependent DNA polymerase)	P10978|POLX_TOBAC|-10000.0|Retrovirus-related Pol polyprotein from transposon TNT 1-94 OS=Nicotiana tabacum PE=2 SV=1	AAW22873.1|-236.4|putative polyprotein [Solanum lycopersicum]
c220506_g2	cellular_component:membrane(GO:0016020);;cellular_component:membrane(GO:0016020);;cellular_component:integral component of membrane(GO:0016021);;molecular_function:kinase activity(GO:0016301);;biological_process:phosphorylation(GO:0016310);;molecular_function:transferase activity(GO:0016740);;molecular_function:nucleotide binding(GO:0000166);;molecular_function:protein serine/threonine kinase act…	-	4081.Solyc01g104050.2.1|-185.5|COG0515|T|Serine Threonine protein kinase	-	O04086|Y1105_ARATH|-200.8|Probable receptor-like protein kinase At1g11050 OS=Arabidopsis thaliana GN=At1g11050 PE=2 SV=1	XP_020701751.1|-221.9|probable receptor-like protein kinase At1g11050 [Dendrobium catenatum]
c214999_g2	-	-	4641.GSMUA_Achr8P13420_001|-155.7|ENOG410XTDR|S|Epidermal growth factor receptor pathway substrate	-	-	XP_020248342.1|-155.7|epidermal growth factor receptor substrate 15-like 1 [Asparagus officinalis]
c226572_g1	-	cmo:103484247|-90.5|K01514|PRUNE, PPX1; exopolyphosphatase [EC:3.6.1.11]|ko00230|Purine metabolism;;	3694.POPTR_0011s15710.1|-99.0|COG1227|C|Manganese-dependent inorganic pyrophosphatase	-	-	XP_020100001.1|-102.5|protein prune homolog [Ananas comosus]
c174778_g1	cellular_component:membrane(GO:0016020);;cellular_component:integral component of membrane(GO:0016021);;molecular_function:nucleotide binding(GO:0000166);;molecular_function:ATP binding(GO:0005524);;cellular_component:membrane(GO:0016020)	-	3694.POPTR_0015s06040.1|-183.2|ENOG410YDXU|S|Leucine rich repeat N-terminal domain	-	Q9SUQ3|Y4374_ARATH|-120.9|Probable inactive receptor kinase At4g23740 OS=Arabidopsis thaliana GN=At4g23740 PE=2 SV=1	XP_020245993.1|-244.8|probable inactive receptor kinase At4g23740 isoform X1 [Asparagus officinalis]
c87405_g1	biological_process:lipid metabolic process(GO:0006629);;biological_process:fatty acid metabolic process(GO:0006631);;biological_process:fatty acid metabolic process(GO:0006631);;biological_process:fatty acid biosynthetic process(GO:0006633);;cellular_component:glyoxysome(GO:0009514);;cellular_component:glyoxysome(GO:0009514);;molecular_function:transferase activity(GO:0016740);;molecular_function…	egu:105043155|-73.7|K07513|ACAA1; acetyl-CoA acyltransferase 1 [EC:2.3.1.16]|ko00592|alpha-Linolenic acid metabolism;;ko00071|Fatty acid degradation;;ko04146|Peroxisome;;ko01040|Biosynthesis of unsaturated fatty acids;;ko00280|Valine, leucine and isoleucine degradation;;ko01212|Fatty acid metabolism;;	4641.GSMUA_Achr1P15360_001|-74.6|COG0183|I|acetyl-coa acetyltransferase	-	Q56WD9|THIK2_ARATH|-72.4|3-ketoacyl-CoA thiolase 2, peroxisomal OS=Arabidopsis thaliana GN=PED1 PE=1 SV=2	XP_020273969.1|-76.1|3-ketoacyl-CoA thiolase 2, peroxisomal-like [Asparagus officinalis]
c105221_g1	-	-	-	-	-	XP_020267702.1|-51.7|RING-H2 finger protein ATL2-like [Asparagus officinalis]
c225935_g4	-	-	4641.GSMUA_Achr11P04750_001|-68.6|ENOG410XQFX|S|kiaa0430	-	-	XP_020255006.1|-72.7|uncharacterized protein LOC109831936 [Asparagus officinalis]
c169146_g1	-	-	4641.GSMUA_Achr1P17960_001|-61.5|ENOG410ZSNT|S|TLR4 regulator and MIR-interacting MSAP	-	-	XP_020242591.1|-65.9|protein canopy-1 [Asparagus officinalis]
c231055_g1	cellular_component:mitochondrion(GO:0005739);;cellular_component:mitochondrion(GO:0005739);;molecular_function:metal ion binding(GO:0046872)	-	4641.GSMUA_Achr6P02160_001|-145.0|COG0484|O|ATP binding to DnaK triggers the release of the substrate protein, thus completing the reaction cycle. Several rounds of ATP-dependent interactions between DnaJ, DnaK and GrpE are required for fully efficient folding. Also involved, together with DnaK and GrpE, in the DNA replication of plasmids through activation of initiation proteins (By similarity)	-	Q38813|DNAJ1_ARATH|-119.7|Chaperone protein dnaJ 1, mitochondrial OS=Arabidopsis thaliana GN=ATJ1 PE=2 SV=2	XP_020255828.1|-174.3|chaperone protein dnaJ 1, mitochondrial isoform X2 [Asparagus officinalis]
c190671_g1	-	-	-	-	-	XP_020241606.1|-49.1|probable RNA-binding protein EIF1AD isoform X1 [Asparagus officinalis]
c74850_g1	-	-	4641.GSMUA_AchrUn_randomP16190_001|-139.9|COG2007|J|40S ribosomal protein S8	-	-	XP_010921825.1|-138.6|PREDICTED: ribosome biogenesis protein NSA2 homolog [Elaeis guineensis]
c225935_g5	molecular_function:metal ion binding(GO:0046872);;biological_process:oxidation-reduction process(GO:0055114);;cellular_component:membrane(GO:0016020);;cellular_component:membrane(GO:0016020);;cellular_component:integral component of membrane(GO:0016021)	-	4641.GSMUA_Achr6P24940_001|-135.2|ENOG410Y10S|S|auxin-responsive protein	-	Q9FKH6|B561P_ARATH|-105.2|Cytochrome b561 and DOMON domain-containing protein At5g35735 OS=Arabidopsis thaliana GN=At5g35735 PE=2 SV=1	XP_020679954.1|-135.2|cytochrome b561 and DOMON domain-containing protein At5g47530-like [Dendrobium catenatum]
c207892_g2	-	-	4641.GSMUA_Achr10P03610_001|-177.9|ENOG410XT6Z|S|DUF246 domain-containing protein	-	-	XP_019706443.1|-184.3|PREDICTED: uncharacterized protein At1g04910-like isoform X2 [Elaeis guineensis]
c225935_g6	cellular_component:ribosome(GO:0005840);;cellular_component:intracellular ribonucleoprotein complex(GO:0030529)	egu:105033698|-61.0|K02962|RP-S17e, RPS17; small subunit ribosomal protein S17e|ko03010|Ribosome;;	4641.GSMUA_Achr1P00810_001|-58.5|COG1383|J|Ribosomal protein	-	Q9SQZ1|RS173_ARATH|-56.8|40S ribosomal protein S17-3 OS=Arabidopsis thaliana GN=RPS17C PE=2 SV=3	XP_008776724.1|-60.1|PREDICTED: 40S ribosomal protein S17-like [Phoenix dactylifera]
c197575_g3	cellular_component:ribosome(GO:0005840);;cellular_component:intracellular ribonucleoprotein complex(GO:0030529)	atr:18436398|-86.9|K02940|RP-L9e, RPL9; large subunit ribosomal protein L9e|ko03010|Ribosome;;	3218.PP1S164_98V6.1|-87.7|COG0097|J|This protein binds to the 23S rRNA, and is important in its secondary structure. It is located near the subunit interface in the base of the L7 L12 stalk, and near the tRNA binding site of the peptidyltransferase center (By similarity)	-	P49209|RL91_ARATH|-88.4|60S ribosomal protein L9-1 OS=Arabidopsis thaliana GN=RPL9B PE=1 SV=3	XP_020240691.1|-88.9|60S ribosomal protein L9-like [Asparagus officinalis]
c201151_g1	-	-	-	-	-	XP_020241926.1|-52.4|homeobox-leucine zipper protein HAT4-like isoform X2 [Asparagus officinalis]
c156591_g2	-	-	-	-	-	ESZ88987.1|-83.8|exonuclease V subunit alpha [Blastomonas sp. CACIA14H2]
c183909_g1	cellular_component:ribosome(GO:0005840);;cellular_component:intracellular ribonucleoprotein complex(GO:0030529)	pop:POPTR_0010s09820g|-60.0|K02974|RP-S24e, RPS24; small subunit ribosomal protein S24e|ko03010|Ribosome;;	3694.POPTR_0010s09820.1|-61.4|COG2004|J|40S ribosomal protein S24	-	Q9SS17|RS241_ARATH|-60.2|40S ribosomal protein S24-1 OS=Arabidopsis thaliana GN=RPS24A PE=2 SV=1	KNA10566.1|-59.3|hypothetical protein SOVF_143160 [Spinacia oleracea]
c231933_g20	-	-	4555.Si036871m|-52.2|COG1670|J|-acetyltransferase	-	-	OAY27965.1|-54.0|hypothetical protein MANES_15G030300 [Manihot esculenta]
c223311_g1	-	-	15368.BRADI4G38500.1|-51.5|ENOG4111TIJ|S|NA	-	-	XP_008804810.1|-50.0|PREDICTED: R3H domain-containing protein 2-like [Phoenix dactylifera]
c222818_g1	cellular_component:membrane(GO:0016020);;cellular_component:membrane(GO:0016020);;cellular_component:integral component of membrane(GO:0016021);;molecular_function:kinase activity(GO:0016301);;biological_process:phosphorylation(GO:0016310);;molecular_function:transferase activity(GO:0016740);;molecular_function:carbohydrate binding(GO:0030246);;molecular_function:nucleotide binding(GO:0000166);;m…	-	4538.ORGLA04G0167800.1|-221.1|COG0515|T|Serine Threonine protein kinase	PF00139.17|Lectin_legB|5.1e-80|Legume lectin domain	O80939|LRK41_ARATH|-207.8|L-type lectin-domain containing receptor kinase IV.1 OS=Arabidopsis thaliana GN=LECRK41 PE=2 SV=1	XP_020256343.1|-272.3|L-type lectin-domain containing receptor kinase IV.1-like [Asparagus officinalis]
c224092_g1	cellular_component:integral component of membrane(GO:0016021);;molecular_function:oxidoreductase activity(GO:0016491);;molecular_function:metal ion binding(GO:0046872);;biological_process:oxidation-reduction process(GO:0055114);;molecular_function:monooxygenase activity(GO:0004497);;cellular_component:membrane(GO:0016020);;cellular_component:membrane(GO:0016020)	-	4113.PGSC0003DMT400046711|-111.2|COG2124|Q|Cytochrome p450	PF00067.20|p450|5.1e-107|Cytochrome P450	P37117|C71A4_SOLME|-110.7|Cytochrome P450 71A4 OS=Solanum melongena GN=CYP71A4 PE=2 SV=1	XP_020248879.1|-137.6|cytochrome P450 71A1-like [Asparagus officinalis]
c108845_g1	cellular_component:plasma membrane(GO:0005886);;cellular_component:clathrin-coated pit(GO:0005905);;cellular_component:clathrin-coated pit(GO:0005905);;biological_process:transport(GO:0006810);;biological_process:endocytosis(GO:0006897);;molecular_function:lipid binding(GO:0008289);;biological_process:protein transport(GO:0015031);;cellular_component:membrane(GO:0016020);;cellular_component:Golgi…	nnu:104610374|-244.4|K11826|AP2M1; AP-2 complex subunit mu-1|ko04144|Endocytosis;;	29760.VIT_02s0012g00910.t01|-244.6|ENOG410XPFS|U|Adaptor-related protein complex	PF00928.19|Adap_comp_sub|3.5e-86|Adaptor complexes medium subunit family	O23140|AP2M_ARATH|-240.6|AP-2 complex subunit mu OS=Arabidopsis thaliana GN=AP2M PE=1 SV=1	XP_010275249.1|-243.6|PREDICTED: AP-2 complex subunit mu [Nelumbo nucifera]
c68194_g1	-	sphi:TS85_06930|-52.3|K01696|trpB; tryptophan synthase beta chain [EC:4.2.1.20]|ko00260|Glycine, serine and threonine metabolism;;ko01230|Biosynthesis of amino acids;;ko00400|Phenylalanine, tyrosine and tryptophan biosynthesis;;	-	-	-	WP_060979407.1|-52.0|MULTISPECIES: tryptophan synthase subunit beta [Proteobacteria]
c14774_g1	-	-	-	-	-	OHC96547.1|-51.3|molybdopterin oxidoreductase [Sphingomonadales bacterium RIFCSPHIGHO2_01_FULL_65_20]
c218972_g7	biological_process:transcription, DNA-templated(GO:0006351);;biological_process:regulation of transcription, DNA-templated(GO:0006355);;biological_process:multicellular organism development(GO:0007275);;biological_process:flower development(GO:0009908);;biological_process:cell differentiation(GO:0030154);;molecular_function:DNA binding(GO:0003677);;cellular_component:nucleus(GO:0005634);;cellular…	-	29760.VIT_07s0031g00220.t01|-99.9|ENOG410YBZ8|K|floral homeotic protein APETALA	-	P47927|AP2_ARATH|-92.4|Floral homeotic protein APETALA 2 OS=Arabidopsis thaliana GN=AP2 PE=1 SV=1	XP_020265583.1|-125.4|floral homeotic protein APETALA 2 [Asparagus officinalis]
c228740_g3	-	pda:103696747|-114.6|K13335|PEX16; peroxin-16|ko04146|Peroxisome;;	4641.GSMUA_Achr9P00960_001|-112.2|ENOG4111GEA|S|Peroxisomal membrane protein	PF08610.8|Pex16|1.8e-70|Peroxisomal membrane protein (Pex16)	-	XP_020243237.1|-120.9|peroxisome biogenesis protein 16 [Asparagus officinalis]
c43366_g1	-	mus:103998400|-89.5|K03245|EIF3J; translation initiation factor 3 subunit J|ko03013|RNA transport;;	4641.GSMUA_Achr1P23030_001|-84.8|ENOG4111U5G|J|Component of the eukaryotic translation initiation factor 3 (eIF-3) complex, which is involved in protein synthesis and, together with other initiation factors, stimulates binding of mRNA and methionyl-tRNAi to the 40S ribosome (By similarity)	-	-	XP_020255574.1|-96.5|eukaryotic translation initiation factor 3 subunit J-like isoform X1 [Asparagus officinalis]
c221424_g1	cellular_component:plastid(GO:0009536);;molecular_function:transferase activity(GO:0016740);;molecular_function:[ribulose-bisphosphate carboxylase]-lysine N-methyltransferase activity(GO:0030785);;biological_process:methylation(GO:0032259);;molecular_function:methyltransferase activity(GO:0008168);;cellular_component:chloroplast(GO:0009507);;cellular_component:chloroplast(GO:0009507)	-	4641.GSMUA_Achr7P21060_001|-171.1|ENOG410Y7DR|S|set domain containing	-	P94026|RBCMT_TOBAC|-161.0|Ribulose-1,5 bisphosphate carboxylase/oxygenase large subunit N-methyltransferase, chloroplastic OS=Nicotiana tabacum GN=RBCMT PE=2 SV=1	XP_010939836.1|-173.5|PREDICTED: fructose-bisphosphate aldolase-lysine N-methyltransferase, chloroplastic [Elaeis guineensis]
c228740_g4	biological_process:rRNA processing(GO:0006364);;molecular_function:isomerase activity(GO:0016853);;cellular_component:intracellular ribonucleoprotein complex(GO:0030529);;biological_process:ribosome biogenesis(GO:0042254);;molecular_function:RNA binding(GO:0003723);;cellular_component:nucleus(GO:0005634);;cellular_component:nucleolus(GO:0005730)	egu:105061517|-236.5|K11131|DKC1, NOLA4, CBF5; H/ACA ribonucleoprotein complex subunit 4 [EC:5.4.99.-]|ko03008|Ribosome biogenesis in eukaryotes;;	39947.LOC_Os07g44190.1|-235.5|COG0130|J|Responsible for synthesis of pseudouridine from uracil- 55 in the psi GC loop of transfer RNAs (By similarity)	-	Q9LD90|CBF5_ARATH|-213.7|H/ACA ribonucleoprotein complex subunit 4 OS=Arabidopsis thaliana GN=CBF5 PE=1 SV=1	OTF98844.1|-239.9|putative NAP57-like protein [Helianthus annuus]
c77243_g2	-	-	-	PF13872.4|AAA_34|5.9e-69|P-loop containing NTP hydrolase pore-1	-	WP_056350050.1|-96.9|methylase [Sphingopyxis sp. Root1497]
c226997_g3	-	-	4641.GSMUA_Achr8P23370_001|-292.2|COG1506|E|peptidase s9 prolyl oligopeptidase active site domain protein	-	-	XP_010939401.1|-298.9|PREDICTED: uncharacterized protein LOC105058230 isoform X1 [Elaeis guineensis]
c186776_g1	biological_process:transcription, DNA-templated(GO:0006351);;molecular_function:phosphoprotein phosphatase activity(GO:0004721);;biological_process:regulation of transcription, DNA-templated(GO:0006355);;molecular_function:protein binding(GO:0005515);;biological_process:multicellular organism development(GO:0007275);;molecular_function:protein binding(GO:0005515);;molecular_function:protein bindi…	-	4641.GSMUA_Achr11P01910_001|-251.6|COG5190|K|CTD (Carboxy-terminal domain, RNA polymerase II, polypeptide A)	-	Q5YDB6|CPL1_ARATH|-196.3|RNA polymerase II C-terminal domain phosphatase-like 1 OS=Arabidopsis thaliana GN=CPL1 PE=1 SV=1	ONK73596.1|-10000.0|uncharacterized protein A4U43_C04F33280 [Asparagus officinalis]
c267244_g1	molecular_function:MAP kinase kinase kinase activity(GO:0004709);;molecular_function:protein binding(GO:0005515);;molecular_function:ATP binding(GO:0005524);;cellular_component:nucleus(GO:0005634);;cellular_component:nucleus(GO:0005634);;biological_process:response to osmotic stress(GO:0006970);;biological_process:response to abscisic acid(GO:0009737);;biological_process:abscisic acid-activated s…	-	3702.AT4G26890.1|-74.1|ENOG410XQGS|T|mitogen-activated protein kinase kinase kinase	-	O80888|M3K17_ARATH|-62.6|Mitogen-activated protein kinase kinase kinase 17 OS=Arabidopsis thaliana GN=MAPKKK17 PE=1 SV=1	XP_010916795.1|-92.9|PREDICTED: mitogen-activated protein kinase kinase kinase A-like [Elaeis guineensis]
c53134_g1	-	-	-	-	-	WP_066926608.1|-48.2|hypothetical protein [Methylobacterium sp. CCH5-D2]
c197712_g1	-	-	-	-	-	WP_023836660.1|-79.7|MULTISPECIES: transcription elongation factor GreA [Proteobacteria]
c213824_g1	-	-	4641.GSMUA_Achr11P15390_001|-106.8|ENOG410XPW0|U|Family with sequence similarity 57, member	-	-	XP_020244085.1|-112.7|transmembrane protein 56 [Asparagus officinalis]
c225685_g1	molecular_function:transferase activity(GO:0016740);;molecular_function:transferase activity, transferring glycosyl groups(GO:0016757)	-	29760.VIT_18s0001g05910.t01|-110.9|COG1819|S|Transferase	-	Q9ZWJ3|U85A2_ARATH|-98.3|UDP-glycosyltransferase 85A2 OS=Arabidopsis thaliana GN=UGT85A2 PE=2 SV=1	XP_020254469.1|-129.5|7-deoxyloganetin glucosyltransferase-like [Asparagus officinalis]
c225541_g1	biological_process:covalent chromatin modification(GO:0016569);;molecular_function:transferase activity(GO:0016740);;molecular_function:histone-lysine N-methyltransferase activity(GO:0018024);;biological_process:methylation(GO:0032259);;cellular_component:nucleus(GO:0005634);;cellular_component:nucleus(GO:0005634);;molecular_function:methyltransferase activity(GO:0008168)	-	39947.LOC_Os08g08210.1|-10000.0|COG2940|S|Histone-lysine N-methyltransferase	-	O23372|ATXR3_ARATH|-212.2|Histone-lysine N-methyltransferase ATXR3 OS=Arabidopsis thaliana GN=ATXR3 PE=2 SV=2	XP_008793621.1|-10000.0|PREDICTED: LOW QUALITY PROTEIN: histone-lysine N-methyltransferase ATXR3-like [Phoenix dactylifera]
c174240_g1	-	sphi:TS85_18045|-121.9|K00962|pnp, PNPT1; polyribonucleotide nucleotidyltransferase [EC:2.7.7.8]|ko00230|Purine metabolism;;ko00240|Pyrimidine metabolism;;ko03018|RNA degradation;;	-	-	-	WP_060978143.1|-140.2|MULTISPECIES: polyribonucleotide nucleotidyltransferase [Proteobacteria]
c23374_g1	-	-	-	-	-	XP_020250655.1|-51.3|nuclear transcription factor Y subunit B-4-like [Asparagus officinalis]
c184827_g1	biological_process:fatty acid metabolic process(GO:0006631);;biological_process:fatty acid biosynthetic process(GO:0006633);;molecular_function:oxidoreductase activity(GO:0016491);;biological_process:oxidation-reduction process(GO:0055114);;cellular_component:mitochondrion(GO:0005739);;cellular_component:mitochondrion(GO:0005739);;biological_process:lipid metabolic process(GO:0006629)	egu:105045788|-160.8|K07512|MECR, NRBF1; mitochondrial trans-2-enoyl-CoA reductase [EC:1.3.1.38]|ko00062|Fatty acid elongation;;ko01212|Fatty acid metabolism;;	29760.VIT_06s0004g03640.t01|-152.3|COG0604|C|alcohol dehydrogenase	-	Q8LCU7|MECR_ARATH|-148.6|Enoyl-[acyl-carrier-protein] reductase, mitochondrial OS=Arabidopsis thaliana GN=At3g45770 PE=1 SV=1	XP_010922492.1|-160.0|PREDICTED: probable trans-2-enoyl-CoA reductase, mitochondrial [Elaeis guineensis]
c191115_g2	cellular_component:endoplasmic reticulum membrane(GO:0005789);;cellular_component:membrane(GO:0016020);;cellular_component:integral component of membrane(GO:0016021);;molecular_function:hydrolase activity(GO:0016787);;molecular_function:nucleotide binding(GO:0000166);;molecular_function:GTP binding(GO:0005525);;cellular_component:endoplasmic reticulum(GO:0005783)	-	4641.GSMUA_Achr6P29830_001|-120.3|ENOG410XPVJ|Z|GTPase activity	PF05879.10|RHD3|8.8e-117|Root hair defective 3 GTP-binding protein (RHD3)	Q2QMH2|RHD31_ORYSJ|-115.7|Protein ROOT HAIR DEFECTIVE 3 homolog 1 OS=Oryza sativa subsp. japonica GN=Os12g0604600 PE=2 SV=1	XP_020105144.1|-118.7|protein ROOT HAIR DEFECTIVE 3 homolog 2-like [Ananas comosus]
c230024_g1	-	-	29760.VIT_04s0008g03480.t01|-188.9|COG3670|Q|dioxygenase	PF03055.13|RPE65|3.5e-92|Retinal pigment epithelial membrane protein	-	XP_020264021.1|-211.9|carotenoid 9,10(9',10')-cleavage dioxygenase-like [Asparagus officinalis]
c196400_g1	molecular_function:sucrose synthase activity(GO:0016157);;molecular_function:transferase activity(GO:0016740);;molecular_function:transferase activity, transferring glycosyl groups(GO:0016757)	mus:103968600|-279.4|K00695|E2.4.1.13; sucrose synthase [EC:2.4.1.13]|ko00500|Starch and sucrose metabolism;;	4641.GSMUA_Achr10P18660_001|-280.7|COG0438|M|Glycosyl transferase (Group 1	PF00862.17|Sucrose_synth|1.4e-268|Sucrose synthase	Q41607|SUS2_TULGE|-277.8|Sucrose synthase 2 OS=Tulipa gesneriana PE=2 SV=1	XP_020270187.1|-295.3|sucrose synthase 2 [Asparagus officinalis]
c191259_g3	cellular_component:chloroplast(GO:0009507);;cellular_component:chloroplast(GO:0009507);;cellular_component:plastid(GO:0009536);;cellular_component:membrane(GO:0016020);;cellular_component:membrane(GO:0016020);;cellular_component:integral component of membrane(GO:0016021);;molecular_function:hydrolase activity(GO:0016787);;molecular_function:nucleotide binding(GO:0000166);;molecular_function:ATP b…	-	29760.VIT_19s0085g01190.t01|-210.8|COG4178|S|(ABC) transporter	PF06472.13|ABC_membrane_2|8.9e-60|ABC transporter transmembrane region 2	Q6NLC1|AB2D_ARATH|-194.2|ABC transporter D family member 2, chloroplastic OS=Arabidopsis thaliana GN=ABCC2 PE=1 SV=1	OTG07920.1|-246.8|putative ABC transporter family protein [Helianthus annuus]
c320978_g1	biological_process:cell cycle(GO:0007049);;biological_process:cell proliferation(GO:0008283);;biological_process:root meristem growth(GO:0010449);;biological_process:cell growth(GO:0016049);;molecular_function:metal ion binding(GO:0046872);;biological_process:gametophyte development(GO:0048229);;biological_process:root development(GO:0048364);;biological_process:cell division(GO:0051301);;biologi…	-	4641.GSMUA_Achr7P04830_001|-120.6|ENOG410XSUJ|S|MOB kinase activator	PF03637.15|Mob1_phocein|9.1e-82|Mob1/phocein family	Q9FHI1|MOB1A_ARATH|-117.1|MOB kinase activator-like 1A OS=Arabidopsis thaliana GN=MOB1A PE=2 SV=1	XP_020241687.1|-119.8|MOB kinase activator-like 1A [Asparagus officinalis]
c320834_g1	cellular_component:membrane(GO:0016020);;cellular_component:integral component of membrane(GO:0016021);;molecular_function:hydrolase activity(GO:0016787);;molecular_function:metal ion binding(GO:0046872);;molecular_function:phosphoprotein phosphatase activity(GO:0004721);;molecular_function:phosphoprotein phosphatase activity(GO:0004721);;cellular_component:membrane(GO:0016020)	-	4558.Sb10g030320.1|-103.0|COG0631|T|Phosphatase	-	Q5Z8P0|P2C60_ORYSJ|-102.4|Probable protein phosphatase 2C 60 OS=Oryza sativa subsp. japonica GN=Os06g0717800 PE=2 SV=1	ONK64332.1|-106.8|uncharacterized protein A4U43_C07F24580 [Asparagus officinalis]
c331914_g1	-	-	-	-	-	WP_027231075.1|-51.7|leucine--tRNA ligase [Phyllobacterium sp. UNC302MFCol5.2]
c230024_g2	-	-	3847.GLYMA18G53545.1|-10000.0|ENOG410XP05|S|HEAT repeat containing	-	-	XP_008802024.1|-10000.0|PREDICTED: HEAT repeat-containing protein 5B isoform X3 [Phoenix dactylifera]
c224373_g2	-	-	-	-	-	ONK81941.1|-49.1|uncharacterized protein A4U43_C01F34490 [Asparagus officinalis]
c172579_g1	-	egu:105031941|-56.6|K13449|PR1; pathogenesis-related protein 1|ko04626|Plant-pathogen interaction;;ko04075|Plant hormone signal transduction;;	4641.GSMUA_Achr2P13240_001|-55.7|COG2340|S|Scp-like extracellular	-	-	XP_010904546.1|-55.8|PREDICTED: pathogenesis-related protein PRB1-3-like [Elaeis guineensis]
c57395_g1	-	mrd:Mrad2831_0924|-70.4|K00658|DLST, sucB; 2-oxoglutarate dehydrogenase E2 component (dihydrolipoamide succinyltransferase) [EC:2.3.1.61]|ko00020|Citrate cycle (TCA cycle);;ko01200|Carbon metabolism;;ko00310|Lysine degradation;;	-	-	-	WP_066921502.1|-77.3|dihydrolipoamide succinyltransferase [Methylobacterium sp. CCH5-D2]
c196400_g3	molecular_function:sucrose synthase activity(GO:0016157);;molecular_function:transferase activity(GO:0016740);;molecular_function:transferase activity, transferring glycosyl groups(GO:0016757)	pda:103714824|-105.1|K00695|E2.4.1.13; sucrose synthase [EC:2.4.1.13]|ko00500|Starch and sucrose metabolism;;	4641.GSMUA_Achr6P10890_001|-101.7|COG0438|M|Glycosyl transferase (Group 1	-	Q41608|SUS1_TULGE|-103.1|Sucrose synthase 1 OS=Tulipa gesneriana PE=2 SV=1	AMN16535.1|-109.5|sucrose synthase [Ornithogalum longebracteatum]
c21569_g1	-	-	-	-	-	XP_020250651.1|-162.9|homeobox protein LUMINIDEPENDENS [Asparagus officinalis]
c218104_g1	molecular_function:hydrolase activity(GO:0016787);;molecular_function:protein binding(GO:0005515);;biological_process:regulation of defense response to fungus(GO:1900150);;molecular_function:protein binding(GO:0005515);;biological_process:regulation of jasmonic acid mediated signaling pathway(GO:2000022);;molecular_function:ATP binding(GO:0005524);;cellular_component:nucleus(GO:0005634);;cellular…	-	3694.POPTR_0008s20050.1|-10000.0|COG0553|L|helicase	PF00176.21|SNF2_N|3.3e-66|SNF2 family N-terminal domain	F4IHS2|SYD_ARATH|-10000.0|Chromatin structure-remodeling complex protein SYD OS=Arabidopsis thaliana GN=SYD PE=1 SV=1	XP_008803891.1|-10000.0|PREDICTED: chromatin structure-remodeling complex protein SYD-like isoform X2 [Phoenix dactylifera]
c130732_g1	-	-	-	-	-	WP_066927008.1|-84.4|AraC family transcriptional regulator [Methylobacterium sp. CCH5-D2]
c286205_g1	-	mus:104000141|-135.8|K01246|tag; DNA-3-methyladenine glycosylase I [EC:3.2.2.20]|ko03410|Base excision repair;;	4641.GSMUA_Achr10P06070_001|-137.1|COG2818|L|DNA-3-methyladenine glycosylase activity	PF03352.11|Adenine_glyco|3e-61|Methyladenine glycosylase	-	XP_020268589.1|-148.7|uncharacterized protein LOC109843993 [Asparagus officinalis]
c195376_g2	molecular_function:DNA binding(GO:0003677);;molecular_function:RNA binding(GO:0003723);;biological_process:gene silencing by RNA(GO:0031047)	-	4641.GSMUA_Achr9P03340_001|-188.1|ENOG410YGHF|S|XH XS domain-containing protein	-	Q9S9P3|FDM1_ARATH|-100.2|Factor of DNA methylation 1 OS=Arabidopsis thaliana GN=FDM1 PE=1 SV=1	ONK62239.1|-212.8|uncharacterized protein A4U43_C07F1800 [Asparagus officinalis]
c215910_g1	cellular_component:cytoplasm(GO:0005737);;biological_process:cytokinin biosynthetic process(GO:0009691);;molecular_function:hydrolase activity(GO:0016787);;cellular_component:nucleus(GO:0005634);;cellular_component:nucleus(GO:0005634);;cellular_component:cytoplasm(GO:0005737)	-	4081.Solyc09g007830.2.1|-95.1|COG1611|S|decarboxylase	-	Q8RUN2|LOG1_ARATH|-93.1|Cytokinin riboside 5'-monophosphate phosphoribohydrolase LOG1 OS=Arabidopsis thaliana GN=LOG1 PE=1 SV=1	XP_008785140.1|-98.1|PREDICTED: cytokinin riboside 5'-monophosphate phosphoribohydrolase LOG1-like [Phoenix dactylifera]
c244502_g1	-	-	-	-	-	WP_081097143.1|-49.7|MULTISPECIES: efflux RND transporter periplasmic adaptor subunit [Proteobacteria]
c215910_g2	-	-	4641.GSMUA_Achr5P26460_001|-95.7|COG0515|T|Serine Threonine protein kinase	-	-	XP_020274259.1|-105.8|uncharacterized protein LOC109848938 [Asparagus officinalis]
c137187_g1	-	-	4555.Si036234m|-78.2|ENOG4111QFC|S|CBS domain-containing protein	-	-	OAY76369.1|-92.1|CBS domain-containing protein CBSX5 [Ananas comosus]
c119675_g1	-	xsa:SB85_07235|-58.8|K03655|recG; ATP-dependent DNA helicase RecG [EC:3.6.4.12]|ko03440|Homologous recombination;;	-	-	-	WP_073974409.1|-103.8|hypothetical protein [Porphyrobacter donghaensis]
c227771_g1	cellular_component:plasma membrane(GO:0005886);;cellular_component:plasma membrane(GO:0005886);;cellular_component:membrane(GO:0016020);;cellular_component:integral component of membrane(GO:0016021);;molecular_function:kinase activity(GO:0016301);;biological_process:phosphorylation(GO:0016310);;molecular_function:transferase activity(GO:0016740);;molecular_function:nucleotide binding(GO:0000166);…	-	4641.GSMUA_Achr4P00140_001|-10000.0|COG0515|T|Serine Threonine protein kinase	-	C0LGD7|Y1684_ARATH|-290.7|Probable LRR receptor-like serine/threonine-protein kinase At1g06840 OS=Arabidopsis thaliana GN=At1g06840 PE=2 SV=2	XP_010922796.1|-10000.0|PREDICTED: probable LRR receptor-like serine/threonine-protein kinase At1g06840 [Elaeis guineensis]
c210094_g1	-	-	4538.ORGLA02G0212000.1|-97.8|ENOG410Y7D6|O|Zinc finger, ZZ type	-	-	XP_020248541.1|-124.3|E3 ubiquitin-protein ligase PRT1-like isoform X1 [Asparagus officinalis]
c176696_g1	-	-	4641.GSMUA_Achr2P13160_001|-50.2|ENOG4111S1X|S|protein binding zinc ion binding	-	-	XP_009388948.1|-48.2|PREDICTED: probable BOI-related E3 ubiquitin-protein ligase 3 [Musa acuminata subsp. malaccensis]
c222424_g4	cellular_component:plasma membrane(GO:0005886);;cellular_component:plasma membrane(GO:0005886);;cellular_component:plasma membrane(GO:0005886);;cellular_component:membrane(GO:0016020);;cellular_component:integral component of membrane(GO:0016021);;molecular_function:kinase activity(GO:0016301);;biological_process:phosphorylation(GO:0016310);;molecular_function:transferase activity(GO:0016740);;mo…	-	4641.GSMUA_Achr1P12150_001|-78.1|COG0515|T|Serine Threonine protein kinase	-	P93604|LRK10_WHEAT|-61.8|Rust resistance kinase Lr10 OS=Triticum aestivum GN=LRK10 PE=2 SV=1	XP_020251736.1|-84.2|rust resistance kinase Lr10-like isoform X2 [Asparagus officinalis]
c187550_g1	-	-	-	-	-	AEX55238.1|-130.3|putative cold-regulated protein [Allium sativum]
c221174_g1	cellular_component:extracellular region(GO:0005576);;cellular_component:extracellular region(GO:0005576);;molecular_function:metal ion binding(GO:0046872)	-	4641.GSMUA_Achr1P11370_001|-154.4|COG1409|S|Hydrolyzes cAMP to 5'-AMP. Plays an important regulatory role in modulating the intracellular concentration of cAMP, thereby influencing cAMP-dependent processes (By similarity)	-	Q9SR79|PPA16_ARATH|-126.2|Probable inactive purple acid phosphatase 16 OS=Arabidopsis thaliana GN=PAP16 PE=2 SV=1	XP_020274624.1|-160.2|probable inactive purple acid phosphatase 16 [Asparagus officinalis]
c176470_g3	cellular_component:cytoplasm(GO:0005737);;cellular_component:cytoplasm(GO:0005737);;cellular_component:membrane(GO:0016020);;cellular_component:membrane(GO:0016020);;molecular_function:nucleotide binding(GO:0000166);;molecular_function:protein binding(GO:0005515);;molecular_function:GTP binding(GO:0005525)	nnu:104604250|-84.6|K04392|RAC1; Ras-related C3 botulinum toxin substrate 1|ko04145|Phagosome;;ko04933|AGE-RAGE signaling pathway in diabetic complications;;	4577.GRMZM5G846811_P01|-84.8|COG1100|S|GTP-binding Protein	-	Q6ZHA3|RAC6_ORYSJ|-85.9|Rac-like GTP-binding protein 6 OS=Oryza sativa subsp. japonica GN=RAC6 PE=2 SV=1	XP_010266823.1|-83.8|PREDICTED: rac-like GTP-binding protein 5 [Nelumbo nucifera]
c232398_g1	cellular_component:membrane(GO:0016020);;cellular_component:integral component of membrane(GO:0016021);;cellular_component:mitochondrion(GO:0005739);;cellular_component:mitochondrial inner membrane(GO:0005743);;cellular_component:mitochondrial inner membrane(GO:0005743)	-	4641.GSMUA_Achr11P14960_001|-135.4|COG0330|O|Band 7 protein	-	O49460|PHB1_ARATH|-123.3|Prohibitin-1, mitochondrial OS=Arabidopsis thaliana GN=PHB1 PE=1 SV=1	XP_009383803.1|-133.4|PREDICTED: prohibitin-1, mitochondrial [Musa acuminata subsp. malaccensis]
c198774_g2	-	-	4577.GRMZM2G097109_P01|-52.0|COG4371|S|Protein of unknown function (DUF1517)	-	-	XP_012089215.1|-50.7|uncharacterized protein LOC105647658 [Jatropha curcas]
c225822_g2	-	-	4641.GSMUA_Achr5P00070_001|-69.2|ENOG4111G6N|S|expressed protein	PF05623.10|DUF789|4.5e-68|Protein of unknown function (DUF789)	-	XP_010938314.1|-77.0|PREDICTED: uncharacterized protein LOC105057412 [Elaeis guineensis]
c198774_g3	-	-	4641.GSMUA_Achr7P27020_001|-138.4|COG4371|S|Protein of unknown function (DUF1517)	PF07466.9|DUF1517|2.7e-101|Protein of unknown function (DUF1517)	-	XP_009411266.1|-136.3|PREDICTED: uncharacterized protein LOC103993062 [Musa acuminata subsp. malaccensis]
c98990_g1	-	-	-	-	-	EQB08714.1|-57.6|hypothetical protein L284_20930 [Novosphingobium lindaniclasticum LE124]
c174521_g2	-	-	-	-	-	WP_060845556.1|-132.7|hypothetical protein [Methylobacterium aquaticum]
c225822_g3	biological_process:UMP salvage(GO:0044206);;molecular_function:uridine kinase activity(GO:0004849);;biological_process:CTP salvage(GO:0044211);;molecular_function:GTP binding(GO:0005525);;cellular_component:cytoplasm(GO:0005737);;cellular_component:cytoplasm(GO:0005737);;biological_process:metabolic process(GO:0008152);;biological_process:metabolic process(GO:0008152);;cellular_component:chloropl…	pda:103716149|-236.8|K00876|udk, UCK; uridine kinase [EC:2.7.1.48]|ko00240|Pyrimidine metabolism;;	39947.LOC_Os09g32820.1|-237.1|COG0035|F|Catalyzes the conversion of uracil and 5-phospho-alpha- D-ribose 1-diphosphate (PRPP) to UMP and diphosphate (By similarity)	PF14681.4|UPRTase|1e-73|Uracil phosphoribosyltransferase	Q9FKS0|UKL1_ARATH|-221.4|Uridine kinase-like protein 1, chloroplastic OS=Arabidopsis thaliana GN=UKL1 PE=1 SV=1	XP_020247574.1|-242.4|LOW QUALITY PROTEIN: uridine kinase-like protein 1, chloroplastic [Asparagus officinalis]
c213574_g1	-	-	4641.GSMUA_Achr3P26690_001|-165.7|ENOG410YC5H|S|Domain of unknown function (DUF3475)	-	-	XP_020241313.1|-193.2|uncharacterized protein LOC109819809 [Asparagus officinalis]
c231086_g1	biological_process:protein ubiquitination(GO:0016567);;molecular_function:transferase activity(GO:0016740)	cit:102606600|-10000.0|K10590|TRIP12; E3 ubiquitin-protein ligase TRIP12 [EC:2.3.2.26]|ko04120|Ubiquitin mediated proteolysis;;	3694.POPTR_0004s18060.1|-10000.0|COG5021|O|ubiquitin protein ligase	PF00632.23|HECT|1.4e-82|HECT-domain (ubiquitin-transferase)	Q6WWW4|UPL3_ARATH|-10000.0|E3 ubiquitin-protein ligase UPL3 OS=Arabidopsis thaliana GN=UPL3 PE=1 SV=1	XP_006486748.1|-10000.0|PREDICTED: E3 ubiquitin-protein ligase UPL3 [Citrus sinensis]
c322059_g1	-	-	-	-	-	WP_066923342.1|-52.6|nucleotidyltransferase [Methylobacterium sp. CCH5-D2]
c190228_g1	-	-	-	-	-	CDX59859.1|-77.3|NADP-dependent isocitrate dehydrogenase (modular protein) [Mesorhizobium plurifarium]
c224510_g2	-	-	3702.AT4G19650.1|-108.1|ENOG410XT49|S|mitochondrial transcription termination	-	-	XP_020263488.1|-202.4|transcription termination factor MTEF18, mitochondrial-like [Asparagus officinalis]
c219022_g1	cellular_component:chloroplast stroma(GO:0009570);;molecular_function:oxidoreductase activity(GO:0016491);;biological_process:response to arsenic-containing substance(GO:0046685);;biological_process:oxidation-reduction process(GO:0055114);;molecular_function:dihydrolipoyl dehydrogenase activity(GO:0004148);;cellular_component:chloroplast(GO:0009507);;cellular_component:plastid(GO:0009536)	spen:107002080|-57.0|K00382|DLD, lpd, pdhD; dihydrolipoamide dehydrogenase [EC:1.8.1.4]|ko00260|Glycine, serine and threonine metabolism;;ko01200|Carbon metabolism;;ko00630|Glyoxylate and dicarboxylate metabolism;;ko00620|Pyruvate metabolism;;ko00020|Citrate cycle (TCA cycle);;ko00280|Valine, leucine and isoleucine degradation;;ko00640|Propanoate metabolism;;ko00010|Glycolysis / Gluconeogenesis;;	4113.PGSC0003DMT400007182|-58.4|COG1249|C|dihydrolipoyl dehydrogenase	-	A8MS68|PLPD1_ARATH|-58.5|Dihydrolipoyl dehydrogenase 1, chloroplastic OS=Arabidopsis thaliana GN=LPD1 PE=2 SV=1	XP_020244122.1|-59.5|dihydrolipoyl dehydrogenase 2, chloroplastic-like [Asparagus officinalis]
c195657_g1	-	-	4513.MLOC_78380.3|-147.8|ENOG410XT49|S|mitochondrial transcription termination	-	-	XP_020263488.1|-225.0|transcription termination factor MTEF18, mitochondrial-like [Asparagus officinalis]
c131650_g1	-	-	4641.GSMUA_AchrUn_randomP12060_001|-166.4|ENOG410ZU39|S|Protein of unknown function (DUF2985)	-	-	XP_020276023.1|-206.1|uncharacterized protein LOC109850415 [Asparagus officinalis]
c229609_g1	biological_process:transport(GO:0006810);;biological_process:transport(GO:0006810);;biological_process:protein transport(GO:0015031);;biological_process:mRNA transport(GO:0051028);;cellular_component:nucleus(GO:0005634);;cellular_component:nuclear pore(GO:0005643);;cellular_component:nuclear pore(GO:0005643)	mus:103969449|-65.5|K14297|NUP98, ADAR2, NUP116; nuclear pore complex protein Nup98-Nup96|ko03013|RNA transport;;	3847.GLYMA12G36350.1|-65.4|ENOG410XPV4|U|nuclear pore complex protein	-	F4ID16|NU98B_ARATH|-62.5|Nuclear pore complex protein NUP98B OS=Arabidopsis thaliana GN=NUP98B PE=1 SV=1	XP_020255027.1|-68.1|nuclear pore complex protein NUP98A isoform X1 [Asparagus officinalis]
c320440_g1	molecular_function:iron-sulfur cluster binding(GO:0051536);;molecular_function:2 iron, 2 sulfur cluster binding(GO:0051537);;biological_process:oxidation-reduction process(GO:0055114);;cellular_component:mitochondrion(GO:0005739);;cellular_component:mitochondrion(GO:0005739);;molecular_function:metal ion binding(GO:0046872)	-	29760.VIT_11s0016g00530.t01|-60.7|COG0633|C|Ferredoxin	-	Q8S904|MFDX2_ARATH|-60.5|Adrenodoxin-like protein 2, mitochondrial OS=Arabidopsis thaliana GN=MFDX2 PE=2 SV=1	XP_020270290.1|-65.9|uncharacterized protein LOC109845452 [Asparagus officinalis]
c22343_g2	cellular_component:respiratory chain(GO:0070469);;cellular_component:mitochondrion(GO:0005739);;cellular_component:mitochondrial matrix(GO:0005759);;biological_process:oxidation-reduction process(GO:0055114)	egu:105059141|-184.3|K03953|NDUFA9; NADH dehydrogenase (ubiquinone) 1 alpha subcomplex subunit 9|ko00190|Oxidative phosphorylation;;	4641.GSMUA_Achr4P04460_001|-183.0|COG0702|GM|epimerase dehydratase	-	Q9SK66|NDUA9_ARATH|-166.6|NADH dehydrogenase [ubiquinone] 1 alpha subcomplex subunit 9, mitochondrial OS=Arabidopsis thaliana GN=At2g20360 PE=1 SV=2	XP_020274754.1|-184.7|NADH dehydrogenase [ubiquinone] 1 alpha subcomplex subunit 9, mitochondrial [Asparagus officinalis]
c211625_g1	cellular_component:cytoplasm(GO:0005737);;cellular_component:cytoplasm(GO:0005737)	-	3711.Bra034308.1-P|-175.2|ENOG410YG1U|S|Pfam:DUF827	PF05701.9|WEMBL|1.8e-202|Weak chloroplast movement under blue light	O48724|WEB1_ARATH|-142.5|Protein WEAK CHLOROPLAST MOVEMENT UNDER BLUE LIGHT 1 OS=Arabidopsis thaliana GN=WEB1 PE=1 SV=1	ONK55416.1|-230.1|uncharacterized protein A4U43_UnF3770 [Asparagus officinalis]
c223342_g2	-	-	4641.GSMUA_Achr5P23670_001|-54.1|ENOG4111S17|S|(ribosomal) protein	-	-	XP_020242152.1|-55.7|54S ribosomal protein L51, mitochondrial isoform X2 [Asparagus officinalis]
c108650_g1	-	-	39947.LOC_Os12g24050.1|-64.5|COG2801|L|Retrotransposon protein	-	-	OMO55084.1|-71.5|reverse transcriptase [Corchorus capsularis]
c182628_g1	-	-	-	-	-	WP_083464291.1|-138.2|hypothetical protein [Prosthecomicrobium hirschii]
c183121_g1	cellular_component:nucleus(GO:0005634);;cellular_component:cytoplasm(GO:0005737);;cellular_component:cytoplasm(GO:0005737);;cellular_component:spindle(GO:0005819);;cellular_component:cytoskeleton(GO:0005856);;biological_process:cell cycle(GO:0007049);;biological_process:multicellular organism development(GO:0007275);;cellular_component:phragmoplast(GO:0009524);;biological_process:auxin-activated …	egu:105045249|-91.7|K03347|CUL1, CDC53; cullin 1|ko04141|Protein processing in endoplasmic reticulum;;ko04120|Ubiquitin mediated proteolysis;;	4641.GSMUA_Achr7P03700_001|-92.8|COG5647|O|cullin 1	-	Q94AH6|CUL1_ARATH|-78.1|Cullin-1 OS=Arabidopsis thaliana GN=CUL1 PE=1 SV=1	XP_008802119.1|-91.0|PREDICTED: cullin-1 [Phoenix dactylifera]
c223486_g3	biological_process:lipid metabolic process(GO:0006629);;biological_process:phospholipid biosynthetic process(GO:0008654);;cellular_component:membrane(GO:0016020);;cellular_component:membrane(GO:0016020);;cellular_component:integral component of membrane(GO:0016021);;biological_process:CDP-diacylglycerol biosynthetic process(GO:0016024);;molecular_function:transferase activity(GO:0016740);;molecul…	egr:104441861|-96.8|K13508|GPAT; glycerol-3-phosphate acyltransferase [EC:2.3.1.15 2.3.1.198]|ko00564|Glycerophospholipid metabolism;;ko00561|Glycerolipid metabolism;;	39946.BGIOSGA004045-PA|-97.9|ENOG410YBU6|I|glycerol3phosphate acyltransferase	-	Q9SHJ5|GPAT1_ARATH|-88.9|Glycerol-3-phosphate acyltransferase 1 OS=Arabidopsis thaliana GN=GPAT1 PE=1 SV=1	XP_020267225.1|-112.3|glycerol-3-phosphate acyltransferase 1-like [Asparagus officinalis]
c216972_g3	-	-	3694.POPTR_0001s02160.1|-181.3|ENOG410Z7Z7|S|Pentatricopeptide repeat-containing protein	-	Q9SSR4|PPR77_ARATH|-137.4|Pentatricopeptide repeat-containing protein At1g52620 OS=Arabidopsis thaliana GN=At1g52620 PE=2 SV=1	XP_020255908.1|-269.6|pentatricopeptide repeat-containing protein At1g52620 isoform X1 [Asparagus officinalis]
c140925_g1	-	-	-	-	-	SDO10083.1|-70.2|hypothetical protein SAMN05443582_101965 [Phyllobacterium sp. OV277]
c221311_g1	cellular_component:mitochondrion(GO:0005739);;cellular_component:mitochondrion(GO:0005739);;biological_process:purine nucleotide biosynthetic process(GO:0006164);;biological_process:'de novo' IMP biosynthetic process(GO:0006189);;biological_process:glutamine metabolic process(GO:0006541);;cellular_component:chloroplast(GO:0009507);;cellular_component:chloroplast(GO:0009507);;cellular_component:pl…	bna:106430171|-10000.0|K01952|purL, PFAS; phosphoribosylformylglycinamidine synthase [EC:6.3.5.3]|ko00230|Purine metabolism;;	3711.Bra015924.1-P|-10000.0|COG0047|F|phosphoribosylformylglycinamidine synthase	PF13507.4|GATase_5|3.1e-106|CobB/CobQ-like glutamine amidotransferase domain	Q9M8D3|PUR4_ARATH|-10000.0|Probable phosphoribosylformylglycinamidine synthase, chloroplastic/mitochondrial OS=Arabidopsis thaliana GN=At1g74260 PE=2 SV=3	XP_006390444.1|-10000.0|hypothetical protein EUTSA_v10018011mg [Eutrema salsugineum]
c204580_g1	molecular_function:kinase activity(GO:0016301);;biological_process:phosphorylation(GO:0016310);;molecular_function:transferase activity(GO:0016740);;molecular_function:nucleotide binding(GO:0000166);;molecular_function:protein serine/threonine kinase activity(GO:0004674);;molecular_function:ATP binding(GO:0005524)	-	3694.POPTR_0015s05400.1|-99.5|ENOG410XQ5A|T|mitogen-activated protein kinase kinase	-	Q9M8J5|M2K8_ARATH|-69.3|Mitogen-activated protein kinase kinase 8 OS=Arabidopsis thaliana GN=MKK8 PE=3 SV=2	XP_008775718.1|-110.0|PREDICTED: mitogen-activated protein kinase kinase 9-like [Phoenix dactylifera]
c194345_g2	cellular_component:mitochondrion(GO:0005739);;cellular_component:mitochondrion(GO:0005739)	-	15368.BRADI4G18590.1|-181.0|ENOG410Z7Z7|S|Pentatricopeptide repeat-containing protein	-	Q0WP85|PP150_ARATH|-163.9|Pentatricopeptide repeat-containing protein At2g13420, mitochondrial OS=Arabidopsis thaliana GN=At2g13420 PE=2 SV=1	XP_008811604.1|-191.8|PREDICTED: pentatricopeptide repeat-containing protein At2g13420, mitochondrial-like [Phoenix dactylifera]
c82762_g1	-	-	-	-	-	WP_060978534.1|-90.3|MULTISPECIES: preprotein translocase subunit SecB [Proteobacteria]
c125076_g1	-	-	-	-	-	XP_020246281.1|-51.6|thioredoxin Y, chloroplastic-like [Asparagus officinalis]
c222092_g2	cellular_component:nucleus(GO:0005634);;cellular_component:chromosome(GO:0005694);;cellular_component:chromosome(GO:0005694);;cellular_component:nucleosome(GO:0000786);;molecular_function:DNA binding(GO:0003677);;cellular_component:nucleus(GO:0005634)	-	29760.VIT_06s0004g04240.t01|-65.2|ENOG4111NV5|B|Core component of nucleosome. Nucleosomes wrap and compact DNA into chromatin, limiting DNA accessibility to the cellular machineries which require DNA as a template. Histones thereby play a central role in transcription regulation, DNA repair, DNA replication and chromosomal stability. DNA accessibility is regulated via a complex set of post-transl…	-	O22582|H2B_GOSHI|-65.7|Histone H2B OS=Gossypium hirsutum GN=HIS2B PE=2 SV=3	XP_020571758.1|-63.5|histone H2B.11 [Phalaenopsis equestris]
c228771_g4	biological_process:methylation(GO:0032259);;biological_process:defense response(GO:0006952);;molecular_function:methyltransferase activity(GO:0008168);;molecular_function:transferase activity(GO:0016740)	egu:105036026|-73.3|K08241|E2.1.1.141; jasmonate O-methyltransferase [EC:2.1.1.141]|ko00592|alpha-Linolenic acid metabolism;;	4641.GSMUA_Achr7P20280_001|-73.4|ENOG4112BHH|S|carboxyl methyltransferase	PF03492.13|Methyltransf_7|5.2e-84|SAM dependent carboxyl methyltransferase	B6SU46|AAMT2_MAIZE|-58.2|Anthranilate O-methyltransferase 2 OS=Zea mays GN=AAMT2 PE=1 SV=1	XP_010910064.1|-72.5|PREDICTED: anthranilate O-methyltransferase 1 [Elaeis guineensis]
c199692_g1	biological_process:fruit ripening(GO:0009835);;cellular_component:membrane(GO:0016020);;cellular_component:integral component of membrane(GO:0016021);;molecular_function:oxidoreductase activity(GO:0016491);;cellular_component:organelle membrane(GO:0031090);;cellular_component:intracellular membrane-bounded organelle(GO:0043231);;molecular_function:metal ion binding(GO:0046872);;biological_process…	-	3847.GLYMA03G03721.1|-125.2|COG2124|Q|Cytochrome p450	PF00067.20|p450|2.8e-100|Cytochrome P450	P24465|C71A1_PERAE|-140.0|Cytochrome P450 71A1 OS=Persea americana GN=CYP71A1 PE=1 SV=2	XP_008793763.1|-159.8|PREDICTED: cytochrome P450 71A9-like [Phoenix dactylifera]
c181378_g1	-	-	29760.VIT_18s0001g14120.t01|-145.4|ENOG410XSXD|S|tRNA methyltransferase 6 homolog (S. cerevisiae)	PF04189.11|Gcd10p|1.1e-60|Gcd10p family	-	XP_020259775.1|-162.3|tRNA (adenine(58)-N(1))-methyltransferase non-catalytic subunit trm6 [Asparagus officinalis]
c94005_g1	-	-	-	-	-	WP_066927782.1|-84.1|protein-tyrosine-phosphatase [Methylobacterium sp. CCH5-D2]
c226884_g2	molecular_function:kinase activity(GO:0016301);;biological_process:phosphorylation(GO:0016310);;molecular_function:transferase activity(GO:0016740);;molecular_function:nucleotide binding(GO:0000166);;molecular_function:protein serine/threonine kinase activity(GO:0004674);;molecular_function:ATP binding(GO:0005524)	-	3847.GLYMA12G09910.1|-177.9|ENOG410Y7JF|T|NIMA-related kinase	-	Q94CU5|NEK5_ORYSJ|-173.2|Serine/threonine-protein kinase Nek5 OS=Oryza sativa subsp. japonica GN=NEK5 PE=3 SV=1	XP_004506217.1|-183.4|PREDICTED: serine/threonine-protein kinase Nek5-like [Cicer arietinum]
c216049_g3	-	-	4641.GSMUA_Achr10P08080_001|-168.1|ENOG410YUZV|S|Protein of unknown function (DUF616)	PF04765.11|DUF616|2.8e-147|Protein of unknown function (DUF616)	-	XP_020255564.1|-178.5|uncharacterized protein LOC109832608 isoform X1 [Asparagus officinalis]
c267275_g1	molecular_function:DNA topoisomerase type II (ATP-hydrolyzing) activity(GO:0003918);;molecular_function:ATP binding(GO:0005524);;cellular_component:mitochondrion(GO:0005739);;cellular_component:mitochondrion(GO:0005739);;cellular_component:chloroplast(GO:0009507);;cellular_component:chloroplast(GO:0009507);;cellular_component:plastid(GO:0009536);;molecular_function:isomerase activity(GO:0016853);…	-	4555.Si034127m|-10000.0|COG0188|L|DNA gyrase negatively supercoils closed circular double- stranded DNA in an ATP-dependent manner and also catalyzes the interconversion of other topological isomers of double-stranded DNA rings, including catenanes and knotted rings (By similarity)	PF00521.18|DNA_topoisoIV|2.3e-153|DNA gyrase/topoisomerase IV, subunit A	Q5YLB5|GYRA_NICBE|-10000.0|DNA gyrase subunit A, chloroplastic/mitochondrial OS=Nicotiana benthamiana GN=GYRA PE=2 SV=1	XP_020274079.1|-10000.0|DNA gyrase subunit A, chloroplastic/mitochondrial [Asparagus officinalis]
c151474_g1	-	-	-	-	-	ONK76932.1|-71.7|uncharacterized protein A4U43_C02F1380 [Asparagus officinalis]
c46733_g1	-	-	-	-	-	WP_060977113.1|-48.4|MULTISPECIES: hypothetical protein [Proteobacteria]
c162554_g1	-	-	-	-	-	XP_009409416.1|-53.2|PREDICTED: E3 ubiquitin-protein ligase ATL31-like [Musa acuminata subsp. malaccensis]
c231223_g2	-	-	59689.fgenesh1_pm.C_scaffold_2001495|-54.8|ENOG410YGT5|S|UBA TS-N domain protein	-	-	XP_010254781.1|-72.9|PREDICTED: auxilin-like protein 1 [Nelumbo nucifera]
c162698_g1	biological_process:phosphorylation(GO:0016310);;molecular_function:protein binding(GO:0005515);;molecular_function:transferase activity(GO:0016740);;molecular_function:protein binding(GO:0005515);;biological_process:defense response to bacterium(GO:0042742);;molecular_function:ATP binding(GO:0005524);;cellular_component:nucleus(GO:0005634);;cellular_component:nucleus(GO:0005634);;cellular_compone…	-	4641.GSMUA_Achr6P33100_001|-188.4|ENOG410XNY0|T|Mitogen-activated protein kinase	PF00069.23|Pkinase|6.9e-72|Protein kinase domain	Q10N20|MPK5_ORYSJ|-179.5|Mitogen-activated protein kinase 5 OS=Oryza sativa subsp. japonica GN=MPK5 PE=1 SV=1	XP_020275576.1|-194.4|mitogen-activated protein kinase 5 [Asparagus officinalis]
c231223_g3	-	-	4641.GSMUA_Achr5P25810_001|-114.2|ENOG410XP4Y|S|be involved in pre-mRNA splicing (By similarity)	-	-	OVA16622.1|-112.9|G-patch domain [Macleaya cordata]
c208367_g1	-	-	3847.GLYMA12G24150.2|-157.2|ENOG410Y80M|S|Domain of unknown function (DUF3598)	-	-	XP_008375778.1|-163.4|PREDICTED: uncharacterized protein LOC103439012 [Malus domestica]
c208223_g1	-	-	4641.GSMUA_Achr2P12270_001|-10000.0|ENOG410ZWAM|S|FG-GAP repeat-containing protein	-	-	XP_020692233.1|-10000.0|uncharacterized protein LOC110106625 [Dendrobium catenatum]
c173778_g1	cellular_component:chloroplast(GO:0009507);;cellular_component:plastid(GO:0009536);;cellular_component:plastoglobule(GO:0010287)	-	4577.GRMZM2G003318_P01|-104.1|ENOG4111HVZ|S|FiBrilliN	PF04755.10|PAP_fibrillin|4.5e-61|PAP_fibrillin	O82291|PAP3_ARATH|-92.8|Probable plastid-lipid-associated protein 3, chloroplastic OS=Arabidopsis thaliana GN=PAP3 PE=2 SV=1	XP_020260812.1|-126.7|probable plastid-lipid-associated protein 3, chloroplastic [Asparagus officinalis]
c127837_g1	molecular_function:hydrolase activity(GO:0016787);;molecular_function:hydrolase activity, acting on glycosyl bonds(GO:0016798);;cellular_component:apoplast(GO:0048046);;cellular_component:apoplast(GO:0048046);;molecular_function:beta-galactosidase activity(GO:0004565);;cellular_component:extracellular region(GO:0005576);;biological_process:metabolic process(GO:0008152)	-	59689.fgenesh2_kg.8__2384__AT5G63800.1|-66.6|COG1874|G|beta-galactosidase	-	Q9FFN4|BGAL6_ARATH|-66.0|Beta-galactosidase 6 OS=Arabidopsis thaliana GN=BGAL6 PE=2 SV=1	ONK73113.1|-68.6|uncharacterized protein A4U43_C04F27390 [Asparagus officinalis]
c224415_g13	-	-	29760.VIT_12s0059g01450.t01|-63.7|ENOG410Y8ZN|S|zinc finger CCCH domain-containing protein	-	-	XP_020265527.1|-85.7|zinc finger CCCH domain-containing protein 33-like isoform X1 [Asparagus officinalis]
c200826_g1	cellular_component:nucleus(GO:0005634);;cellular_component:nucleoplasm(GO:0005654);;cellular_component:nucleoplasm(GO:0005654);;cellular_component:chromosome(GO:0005694);;cellular_component:chromosome(GO:0005694);;biological_process:transcription, DNA-templated(GO:0006351);;biological_process:regulation of transcription, DNA-templated(GO:0006355);;molecular_function:sequence-specific DNA binding(…	-	4641.GSMUA_Achr1P19840_001|-80.0|ENOG410YFD3|S|AT hook motif domain containing protein, expressed	-	Q8VYJ2|AHL1_ARATH|-62.8|AT-hook motif nuclear-localized protein 1 OS=Arabidopsis thaliana GN=AHL1 PE=1 SV=1	XP_010940979.1|-88.4|PREDICTED: AT-hook motif nuclear-localized protein 1-like [Elaeis guineensis]
c131931_g1	-	-	-	-	-	WP_076612341.1|-129.8|IS256 family transposase ISMex3 [Methylobacterium extorquens]
c320721_g1	-	-	4558.Sb04g033900.1|-51.5|COG0545|O|Peptidyl-prolyl cis-trans isomerase	-	-	XP_020277419.1|-53.3|peptidyl-prolyl cis-trans isomerase FKBP12 [Asparagus officinalis]
c230055_g1	-	-	39947.LOC_Os12g28690.1|-93.5|COG2801|L|Retrotransposon protein	-	-	XP_020243423.1|-97.7|uncharacterized protein LOC109821665, partial [Asparagus officinalis]
c196431_g1	biological_process:transcription, DNA-templated(GO:0006351);;biological_process:regulation of transcription, DNA-templated(GO:0006355);;biological_process:flower development(GO:0009908);;cellular_component:Cdc73/Paf1 complex(GO:0016593);;cellular_component:nucleus(GO:0005634);;cellular_component:nucleus(GO:0005634);;cellular_component:nucleus(GO:0005634)	-	4641.GSMUA_Achr9P09340_001|-221.2|ENOG410XRI0|K|positive regulation of transcription elongation from RNA polymerase II promoter	-	Q9FNQ0|VIP4_ARATH|-151.2|Protein LEO1 homolog OS=Arabidopsis thaliana GN=VIP4 PE=1 SV=1	XP_020270214.1|-258.9|protein LEO1 homolog [Asparagus officinalis]
c331801_g1	-	bju:BJ6T_03030|-70.6|K00451|HGD, hmgA; homogentisate 1,2-dioxygenase [EC:1.13.11.5]|ko00350|Tyrosine metabolism;;	-	PF04209.11|HgmA|1.1e-60|homogentisate 1,2-dioxygenase	-	ERF82792.1|-71.4|homogentisate 1,2-dioxygenase [Bradyrhizobium sp. DFCI-1]
c179226_g1	biological_process:protein ubiquitination(GO:0016567);;molecular_function:transferase activity(GO:0016740);;molecular_function:metal ion binding(GO:0046872)	-	4641.GSMUA_Achr6P23120_001|-101.3|ENOG410XP9Y|O|RING finger) protein	-	Q84RR2|ARI2_ARATH|-87.6|Probable E3 ubiquitin-protein ligase ARI2 OS=Arabidopsis thaliana GN=ARI2 PE=2 SV=1	XP_020257803.1|-99.7|probable E3 ubiquitin-protein ligase ARI2 [Asparagus officinalis]
c4863_g1	-	-	-	-	-	SDP69578.1|-54.7|putative ABC transport system ATP-binding protein [Phyllobacterium sp. OV277]
c179226_g2	biological_process:protein ubiquitination(GO:0016567);;molecular_function:transferase activity(GO:0016740);;molecular_function:metal ion binding(GO:0046872)	-	4558.Sb01g042240.1|-95.9|ENOG410XP9Y|O|RING finger) protein	-	Q84RR2|ARI2_ARATH|-88.6|Probable E3 ubiquitin-protein ligase ARI2 OS=Arabidopsis thaliana GN=ARI2 PE=2 SV=1	XP_010906907.1|-99.7|PREDICTED: LOW QUALITY PROTEIN: probable E3 ubiquitin-protein ligase ARI2 [Elaeis guineensis]
c200151_g1	-	-	3711.Bra018866.1-P|-81.2|ENOG410Y9JN|S|expressed protein	-	-	CDY22812.1|-79.6|BnaA06g02650D [Brassica napus]
c200295_g1	-	nar:Saro_3267|-87.5|K01620|ltaE; threonine aldolase [EC:4.1.2.48]|ko00260|Glycine, serine and threonine metabolism;;ko01230|Biosynthesis of amino acids;;	-	-	-	WP_066274546.1|-125.7|threonine aldolase [Blastomonas sp. CCH1-A6]
c155117_g1	-	pda:103715665|-157.2|K09562|HSPBP1; hsp70-interacting protein|ko04141|Protein processing in endoplasmic reticulum;;	4641.GSMUA_Achr10P22570_001|-156.8|ENOG410Y90B|O|HSPA (heat shock 70kDa) binding protein, cytoplasmic cochaperone 1	-	-	XP_008801595.1|-156.4|PREDICTED: hsp70-binding protein 1-like [Phoenix dactylifera]
c195263_g1	-	-	4555.Si006278m|-93.0|ENOG410Y216|S|DUF246 domain-containing protein	-	-	XP_020264395.1|-102.3|uncharacterized protein At1g04910-like [Asparagus officinalis]
c210512_g1	molecular_function:ATP binding(GO:0005524);;molecular_function:hydrolase activity(GO:0016787);;molecular_function:nucleotide binding(GO:0000166);;molecular_function:RNA binding(GO:0003723);;molecular_function:helicase activity(GO:0004386)	egu:105053252|-10000.0|K14442|DHX36, RHAU; ATP-dependent RNA helicase DHX36 [EC:3.6.4.13]|ko03018|RNA degradation;;	39947.LOC_Os03g53760.1|-10000.0|COG1643|L|helicase	-	F4HYJ7|DEXH3_ARATH|-10000.0|DExH-box ATP-dependent RNA helicase DExH3 OS=Arabidopsis thaliana GN=At1g48650 PE=3 SV=1	XP_010932650.1|-10000.0|PREDICTED: DExH-box ATP-dependent RNA helicase DExH5, mitochondrial isoform X1 [Elaeis guineensis]
c141987_g1	-	-	384765.SIAM614_00255|-54.1|COG2801|L|Retrotransposon protein	-	-	WP_086014487.1|-100.4|IS3 family transposase [Sphingomonas wittichii]
c194095_g1	cellular_component:nucleus(GO:0005634);;cellular_component:nucleus(GO:0005634);;cellular_component:cytoplasm(GO:0005737);;cellular_component:cytosol(GO:0005829);;molecular_function:photoreceptor activity(GO:0009881);;biological_process:protein-chromophore linkage(GO:0018298);;biological_process:response to stimulus(GO:0050896);;molecular_function:protein binding(GO:0005515);;molecular_function:pr…	-	4641.GSMUA_Achr3P19000_001|-203.3|COG5184|DZ|regulator of chromosome condensation	-	Q9FN03|UVR8_ARATH|-187.3|Ultraviolet-B receptor UVR8 OS=Arabidopsis thaliana GN=UVR8 PE=1 SV=1	XP_020245605.1|-205.5|ultraviolet-B receptor UVR8-like, partial [Asparagus officinalis]
c148298_g1	cellular_component:ribosome(GO:0005840);;cellular_component:intracellular ribonucleoprotein complex(GO:0030529)	obr:102722192|-85.7|K02889|RP-L21e, RPL21; large subunit ribosomal protein L21e|ko03010|Ribosome;;	4533.OB03G13290.1|-86.8|COG2139|J|(ribosomal) protein	-	Q9FDZ9|RL212_ARATH|-82.3|60S ribosomal protein L21-2 OS=Arabidopsis thaliana GN=RPL21E PE=2 SV=1	XP_006649384.1|-84.8|PREDICTED: 60S ribosomal protein L21-1 [Oryza brachyantha]
c268193_g1	-	-	-	PF04332.13|DUF475|1.8e-59|Protein of unknown function (DUF475)	-	-
c220424_g1	-	-	4641.GSMUA_Achr5P29130_001|-113.6|ENOG410XRSQ|S|Transfer protein	-	-	XP_018823290.1|-102.2|PREDICTED: uncharacterized protein LOC108992996 [Juglans regia]
c267412_g1	molecular_function:lactoylglutathione lyase activity(GO:0004462);;molecular_function:lyase activity(GO:0016829);;molecular_function:metal ion binding(GO:0046872)	egu:105061135|-97.3|K01759|GLO1, gloA; lactoylglutathione lyase [EC:4.4.1.5]|ko00620|Pyruvate metabolism;;	29760.VIT_06s0061g00460.t01|-94.0|ENOG4111FDV|S|Lactoylglutathione lyase	-	Q9ZS21|LGUL_SOYBN|-91.5|Lactoylglutathione lyase OS=Glycine max GN=GLXI PE=1 SV=1	BAK23262.1|-103.8|glyoxalase I [Allium cepa]
c228047_g2	cellular_component:integral component of membrane(GO:0016021);;molecular_function:oxidoreductase activity(GO:0016491);;molecular_function:metal ion binding(GO:0046872);;biological_process:oxidation-reduction process(GO:0055114);;molecular_function:monooxygenase activity(GO:0004497);;cellular_component:membrane(GO:0016020);;cellular_component:membrane(GO:0016020)	-	3694.POPTR_0013s15670.1|-85.8|COG2124|Q|Cytochrome p450	PF00067.20|p450|8.9e-69|Cytochrome P450	Q2QYH7|C14C2_ORYSJ|-86.0|Cytochrome P450 714C2 OS=Oryza sativa subsp. japonica GN=CYP714C2 PE=2 SV=1	XP_020243616.1|-123.8|cytochrome P450 714C2-like [Asparagus officinalis]
c285068_g1	cellular_component:endosome(GO:0005768);;cellular_component:late endosome(GO:0005770);;molecular_function:guanyl-nucleotide exchange factor activity(GO:0005085);;molecular_function:protein binding(GO:0005515);;cellular_component:endosome(GO:0005768)	-	15368.BRADI3G36270.1|-170.4|ENOG410XRE1|S|Vacuolar fusion protein CCZ1 homolog	PF08217.9|DUF1712|6.4e-74|Fungal domain of unknown function (DUF1712)	C0Z274|CCZ1B_ARATH|-168.1|Vacuolar fusion protein CCZ1 homolog B OS=Arabidopsis thaliana GN=CCZ1B PE=1 SV=1	XP_020274421.1|-216.2|vacuolar fusion protein CCZ1 homolog isoform X2 [Asparagus officinalis]
c89272_g1	biological_process:transcription, DNA-templated(GO:0006351);;biological_process:regulation of transcription, DNA-templated(GO:0006355);;molecular_function:DNA binding(GO:0003677);;cellular_component:nucleus(GO:0005634);;cellular_component:nucleus(GO:0005634)	-	4113.PGSC0003DMT400028917|-82.0|ENOG4111MVP|K|Transcription factor	-	Q9ZUG9|BH066_ARATH|-69.0|Transcription factor bHLH66 OS=Arabidopsis thaliana GN=BHLH66 PE=2 SV=1	XP_002523493.1|-84.9|PREDICTED: transcription factor bHLH66 [Ricinus communis]
c232141_g1	-	-	-	-	-	GAU41954.1|-89.2|hypothetical protein TSUD_380590 [Trifolium subterraneum]
c231648_g1	-	-	-	-	-	ABQ96641.1|-82.6|replicase, partial [Garlic virus B1]
c228047_g3	-	-	4577.GRMZM2G163440_P01|-87.8|ENOG410Z7Z7|S|Pentatricopeptide repeat-containing protein	-	-	XP_020241462.1|-108.1|pentatricopeptide repeat-containing protein At1g11900-like [Asparagus officinalis]
c220568_g2	molecular_function:ATP binding(GO:0005524);;cellular_component:nucleus(GO:0005634);;cellular_component:nucleus(GO:0005634);;biological_process:DNA repair(GO:0006281);;biological_process:cellular response to DNA damage stimulus(GO:0006974);;molecular_function:nucleotide binding(GO:0000166);;molecular_function:DNA binding(GO:0003677);;molecular_function:protein binding(GO:0005515)	pda:103715035|-10000.0|K08737|MSH6; DNA mismatch repair protein MSH6|ko03430|Mismatch repair;;	59689.scaffold_604079.1|-10000.0|COG0249|L|that it carries out the mismatch recognition step. This protein has a weak ATPase activity (By similarity)	PF00488.19|MutS_V|6.1e-70|MutS domain V	O04716|MSH6_ARATH|-10000.0|DNA mismatch repair protein MSH6 OS=Arabidopsis thaliana GN=MSH6 PE=1 SV=2	XP_008800758.1|-10000.0|PREDICTED: DNA mismatch repair protein MSH6 [Phoenix dactylifera]
c231648_g2	-	-	-	PF05549.9|Allexi_40kDa|1.8e-115|Allexivirus 40kDa protein	-	YP_009110671.1|-167.4|40kDa protein [Garlic virus B]
c220568_g3	cellular_component:cytoskeleton(GO:0005856);;cellular_component:cytoskeleton(GO:0005856);;cellular_component:microtubule(GO:0005874);;molecular_function:nucleotide binding(GO:0000166);;molecular_function:ATP binding(GO:0005524);;cellular_component:cytoplasm(GO:0005737)	-	29760.VIT_02s0025g05090.t01|-290.4|COG5059|Z|Kinesin family member	PF00225.21|Kinesin|2e-96|Kinesin motor domain	Q5VQ09|KINUB_ORYSJ|-10000.0|Kinesin-like protein KIN-UB OS=Oryza sativa subsp. japonica GN=KINUB PE=2 SV=1	XP_008804004.1|-10000.0|PREDICTED: armadillo repeat-containing kinesin-like protein 2 [Phoenix dactylifera]
c323114_g1	biological_process:mRNA processing(GO:0006397);;biological_process:mitochondrial mRNA modification(GO:0080156);;cellular_component:mitochondrion(GO:0005739);;cellular_component:mitochondrion(GO:0005739);;cellular_component:mitochondrion(GO:0005739)	-	3694.POPTR_0005s22150.1|-169.3|ENOG410Z7Z7|S|Pentatricopeptide repeat-containing protein	-	B8YEK4|OGR1_ORYSJ|-161.3|Pentatricopeptide repeat-containing protein OGR1, mitochondrial OS=Oryza sativa subsp. japonica GN=OGR1 PE=2 SV=1	XP_019709965.1|-175.6|PREDICTED: pentatricopeptide repeat-containing protein OGR1, mitochondrial isoform X1 [Elaeis guineensis]
c117675_g1	molecular_function:transferase activity(GO:0016740);;molecular_function:transferase activity, transferring glycosyl groups(GO:0016757);;cellular_component:membrane(GO:0016020);;cellular_component:membrane(GO:0016020);;cellular_component:integral component of membrane(GO:0016021)	-	3711.Bra005241.1-P|-69.0|COG1819|S|Transferase	-	Q9ZQ94|U73C5_ARATH|-67.4|UDP-glycosyltransferase 73C5 OS=Arabidopsis thaliana GN=UGT73C5 PE=2 SV=1	XP_020250751.1|-101.2|UDP-glycosyltransferase 73C5-like isoform X1 [Asparagus officinalis]
c129392_g1	-	-	-	-	-	XP_010656394.1|-49.5|PREDICTED: uncharacterized protein LOC104880653 [Vitis vinifera]
c220568_g4	biological_process:nodulation(GO:0009877);;molecular_function:protein binding(GO:0005515);;biological_process:nodulation(GO:0009877);;molecular_function:ATP binding(GO:0005524);;cellular_component:membrane(GO:0016020);;cellular_component:vacuole(GO:0005773);;cellular_component:vacuolar lumen(GO:0005775);;cellular_component:vacuolar lumen(GO:0005775);;cellular_component:plasma membrane(GO:0005886)…	gmx:100802308|-191.2|K13429|CERK1; chitin elicitor receptor kinase 1|ko04626|Plant-pathogen interaction;;	3847.GLYMA15G11785.1|-192.5|COG0515|T|Serine Threonine protein kinase	-	Q6UD73|LYK3_MEDTR|-168.9|LysM domain receptor-like kinase 3 OS=Medicago truncatula GN=LYK3 PE=1 SV=1	XP_017969283.1|-194.5|PREDICTED: lysM domain receptor-like kinase 3 [Theobroma cacao]
c225853_g2	cellular_component:chloroplast(GO:0009507);;cellular_component:plastid(GO:0009536);;molecular_function:ligase activity(GO:0016874);;biological_process:lipid metabolic process(GO:0006629);;biological_process:fatty acid metabolic process(GO:0006631);;cellular_component:chloroplast(GO:0009507)	pda:103710616|-277.6|K01897|ACSL, fadD; long-chain acyl-CoA synthetase [EC:6.2.1.3]|ko00071|Fatty acid degradation;;ko00061|Fatty acid biosynthesis;;ko04146|Peroxisome;;ko01212|Fatty acid metabolism;;	4555.Si038959m|-276.9|COG1022|I|Amp-dependent synthetase and ligase	PF00501.26|AMP-binding|5.4e-93|AMP-binding enzyme	Q9LK39|AAE16_ARATH|-254.1|Probable acyl-activating enzyme 16, chloroplastic OS=Arabidopsis thaliana GN=AAE16 PE=2 SV=1	ONK72558.1|-304.7|uncharacterized protein A4U43_C04F20670 [Asparagus officinalis]
c202381_g1	-	-	4641.GSMUA_Achr11P18490_001|-60.5|COG5183|O|(Membrane-Associated Ring finger (C3HC4))	-	-	XP_020241407.1|-75.0|uncharacterized protein LOC109819867 isoform X4 [Asparagus officinalis]
c157203_g1	cellular_component:nucleus(GO:0005634);;cellular_component:nucleus(GO:0005634);;cellular_component:cytoplasm(GO:0005737);;cellular_component:cytoplasm(GO:0005737);;molecular_function:kinase activity(GO:0016301);;biological_process:phosphorylation(GO:0016310);;molecular_function:transferase activity(GO:0016740);;molecular_function:nucleotide binding(GO:0000166);;molecular_function:protein serine/t…	-	29760.VIT_06s0004g07870.t01|-82.0|COG0515|T|Serine Threonine protein kinase	-	Q9LZW4|CIPKE_ARATH|-70.9|CBL-interacting serine/threonine-protein kinase 14 OS=Arabidopsis thaliana GN=CIPK14 PE=1 SV=1	XP_020683887.1|-98.7|CBL-interacting serine/threonine-protein kinase 14-like [Dendrobium catenatum]
c59038_g2	-	-	-	-	-	WP_040110216.1|-80.8|MULTISPECIES: acyl-CoA dehydrogenase [Sphingomonadaceae]
c202381_g2	-	-	-	-	-	XP_020241405.1|-48.3|uncharacterized protein LOC109819867 isoform X3 [Asparagus officinalis]
c213461_g1	molecular_function:helicase activity(GO:0004386);;molecular_function:ATP binding(GO:0005524);;cellular_component:nucleus(GO:0005634);;cellular_component:nucleus(GO:0005634);;biological_process:rRNA processing(GO:0006364);;molecular_function:hydrolase activity(GO:0016787);;biological_process:ribosome biogenesis(GO:0042254);;molecular_function:nucleotide binding(GO:0000166);;biological_process:nucl…	egu:105052957|-214.2|K12823|DDX5, DBP2; ATP-dependent RNA helicase DDX5/DBP2 [EC:3.6.4.13]|ko03040|Spliceosome;;	4081.Solyc03g112350.2.1|-212.1|COG0513|L|purine NTP-dependent helicase activity	-	Q5N7W4|RH30_ORYSJ|-203.5|DEAD-box ATP-dependent RNA helicase 30 OS=Oryza sativa subsp. japonica GN=Os01g0911100 PE=2 SV=2	XP_010932245.1|-213.4|PREDICTED: DEAD-box ATP-dependent RNA helicase 20 [Elaeis guineensis]
c168427_g1	cellular_component:plasma membrane(GO:0005886);;biological_process:transport(GO:0006810);;biological_process:protein transport(GO:0015031);;cellular_component:membrane(GO:0016020);;cellular_component:Golgi membrane(GO:0000139);;cellular_component:Golgi apparatus(GO:0005794);;cellular_component:plasma membrane(GO:0005886)	-	4641.GSMUA_Achr9P01730_001|-115.2|ENOG410XRSQ|S|Transfer protein	-	F4J7S8|SFH9_ARATH|-123.9|Phosphatidylinositol/phosphatidylcholine transfer protein SFH9 OS=Arabidopsis thaliana GN=SFH9 PE=2 SV=1	XP_020245819.1|-194.1|phosphatidylinositol/phosphatidylcholine transfer protein SFH9-like isoform X1 [Asparagus officinalis]
c197493_g1	biological_process:transcription, DNA-templated(GO:0006351);;biological_process:regulation of transcription, DNA-templated(GO:0006355);;biological_process:multicellular organism development(GO:0007275);;molecular_function:DNA binding(GO:0003677);;cellular_component:nucleus(GO:0005634);;cellular_component:nucleus(GO:0005634)	egr:104434125|-81.6|K13424|WRKY33; WRKY transcription factor 33|ko04626|Plant-pathogen interaction;;	3711.Bra026869.1-P|-76.3|ENOG410YBRT|K|Transcription factor	-	Q9FG77|WRKY2_ARATH|-101.7|Probable WRKY transcription factor 2 OS=Arabidopsis thaliana GN=WRKY2 PE=1 SV=1	NP_001292627.1|-112.2|probable WRKY transcription factor 2 [Cucumis sativus]
c201600_g2	cellular_component:cytoplasm(GO:0005737);;cellular_component:cytoplasm(GO:0005737);;biological_process:glutathione catabolic process(GO:0006751);;molecular_function:transferase activity(GO:0016740);;molecular_function:transferase activity, transferring acyl groups(GO:0016746);;molecular_function:gamma-glutamylcyclotransferase activity(GO:0003839);;molecular_function:gamma-glutamylcyclotransferase…	-	3694.POPTR_0005s15800.1|-78.2|COG3703|P|cation transport	-	Q84QC1|GCT23_ARATH|-74.1|Gamma-glutamylcyclotransferase 2-3 OS=Arabidopsis thaliana GN=GGCT2;3 PE=1 SV=1	OWM90159.1|-79.8|hypothetical protein CDL15_Pgr006480 [Punica granatum]
c224685_g1	-	-	4641.GSMUA_Achr5P25650_001|-53.2|ENOG4111EB4|S|Pfam:DUF248	-	-	XP_020261498.1|-56.7|probable methyltransferase PMT17 [Asparagus officinalis]
c316295_g1	-	-	-	-	-	WP_056635139.1|-54.2|peptidoglycan glycosyltransferase [Sphingomonas sp. Leaf231]
c127587_g1	-	mam:Mesau_01359|-55.8|K02424|fliY; cystine transport system substrate-binding protein|ko02010|ABC transporters;;	-	-	-	SDP90482.1|-60.0|amino acid ABC transporter substrate-binding protein, PAAT family [Phyllobacterium sp. OV277]
c224685_g2	cellular_component:integral component of membrane(GO:0016021);;molecular_function:hydrolase activity(GO:0016787);;cellular_component:chloroplast membrane(GO:0031969);;cellular_component:chloroplast(GO:0009507);;cellular_component:plastid(GO:0009536);;cellular_component:membrane(GO:0016020)	-	4641.GSMUA_Achr3P01450_001|-121.9|COG0671|I|PHOsphatase	-	Q8LFD1|LPP3_ARATH|-112.8|Putative lipid phosphate phosphatase 3, chloroplastic OS=Arabidopsis thaliana GN=LPP3 PE=2 SV=1	XP_020252047.1|-131.1|lipid phosphate phosphatase 2-like [Asparagus officinalis]
c138523_g1	-	-	-	-	-	WP_060977573.1|-84.2|MULTISPECIES: DUF4139 domain-containing protein [Proteobacteria]
c218416_g1	-	-	4641.GSMUA_Achr9P00180_001|-129.2|ENOG410ZYUM|S|O-acyltransferase (WSD1-like)	-	-	ONK69157.1|-163.5|uncharacterized protein A4U43_C05F19940 [Asparagus officinalis]
c156179_g1	-	-	4081.Solyc06g069700.2.1|-73.7|ENOG410Z7Z7|S|Pentatricopeptide repeat-containing protein	-	Q9FLJ4|PP440_ARATH|-68.9|Pentatricopeptide repeat-containing protein At5g61400 OS=Arabidopsis thaliana GN=At5g61400 PE=2 SV=1	XP_020521717.1|-82.7|pentatricopeptide repeat-containing protein At5g61400 isoform X1 [Amborella trichopoda]
c224685_g3	cellular_component:membrane(GO:0016020);;cellular_component:integral component of membrane(GO:0016021);;molecular_function:transferase activity(GO:0016740);;biological_process:methylation(GO:0032259);;cellular_component:endoplasmic reticulum(GO:0005783);;cellular_component:endoplasmic reticulum membrane(GO:0005789);;molecular_function:methyltransferase activity(GO:0008168)	-	29760.VIT_05s0124g00530.t01|-149.2|ENOG4111EGP|U|Pfam:DUF248	PF03141.14|Methyltransf_29|2.3e-151|Putative S-adenosyl-L-methionine-dependent methyltransferase	O80844|PMTG_ARATH|-136.9|Probable methyltransferase PMT16 OS=Arabidopsis thaliana GN=At2g45750 PE=3 SV=1	XP_010912141.1|-173.1|PREDICTED: probable methyltransferase PMT19 [Elaeis guineensis]
c167259_g1	-	-	-	-	-	WP_082773120.1|-159.7|chemotaxis protein [Methylobacterium sp. CCH5-D2]
c196181_g1	biological_process:transport(GO:0006810);;biological_process:protein transport(GO:0015031)	-	4641.GSMUA_Achr9P24460_001|-112.1|COG5158|U|Vacuolar Protein	-	Q9C5P7|SEC1A_ARATH|-104.4|Protein transport Sec1a OS=Arabidopsis thaliana GN=SEC1A PE=2 SV=3	XP_020244229.1|-122.5|SNARE-interacting protein KEULE-like isoform X2 [Asparagus officinalis]
c160211_g2	-	-	-	-	-	WP_060979501.1|-61.9|MULTISPECIES: hypothetical protein [Acidovorax]
c126275_g1	-	-	29760.VIT_18s0089g00610.t01|-67.6|ENOG410Y0M4|S|cytoplasmic membrane protein	-	-	XP_020245479.1|-72.8|uncharacterized protein LOC109823612 [Asparagus officinalis]
c126131_g1	biological_process:transcription, DNA-templated(GO:0006351);;biological_process:regulation of transcription, DNA-templated(GO:0006355);;biological_process:multicellular organism development(GO:0007275);;molecular_function:DNA binding(GO:0003677);;cellular_component:nucleus(GO:0005634);;cellular_component:nucleus(GO:0005634)	-	4641.GSMUA_Achr10P19290_001|-69.2|COG5068|K|Transcription factor	-	Q9FUY6|JOIN_SOLLC|-65.2|MADS-box protein JOINTLESS OS=Solanum lycopersicum GN=J PE=1 SV=1	AEX92969.1|-82.6|MADS box protein 5, partial [Agave tequilana]
c182659_g1	-	-	-	-	-	KPF88565.1|-68.0|TrwC protein, partial [Novosphingobium sp. AAP83]
c165784_g1	-	-	3847.GLYMA04G10390.1|-55.6|ENOG410XSYR|S|UPF0378 protein	-	-	XP_020258640.1|-57.7|protein SABRE-like isoform X2 [Asparagus officinalis]
c137211_g1	biological_process:glycolytic process(GO:0006096);;biological_process:glycolytic process(GO:0006096);;molecular_function:oxidoreductase activity(GO:0016491);;biological_process:oxidation-reduction process(GO:0055114);;molecular_function:glyceraldehyde-3-phosphate dehydrogenase (NAD+) (phosphorylating) activity(GO:0004365);;cellular_component:cytoplasm(GO:0005737);;cellular_component:cytoplasm(GO:…	mdm:103403121|-178.3|K00134|GAPDH, gapA; glyceraldehyde 3-phosphate dehydrogenase [EC:1.2.1.12]|ko00710|Carbon fixation in photosynthetic organisms;;ko01200|Carbon metabolism;;ko01230|Biosynthesis of amino acids;;ko00010|Glycolysis / Gluconeogenesis;;	3694.POPTR_0012s09570.1|-176.5|COG0057|G|glyceraldehyde3phosphate dehydrogenase	PF02800.18|Gp_dh_C|2.7e-71|Glyceraldehyde 3-phosphate dehydrogenase, C-terminal domain	P25861|G3PC_ANTMA|-177.2|Glyceraldehyde-3-phosphate dehydrogenase, cytosolic OS=Antirrhinum majus GN=GAPC PE=2 SV=1	XP_020260223.1|-181.8|glyceraldehyde-3-phosphate dehydrogenase 2, cytosolic [Asparagus officinalis]
c165784_g2	-	-	4641.GSMUA_Achr6P22400_001|-55.9|ENOG410XSYR|S|UPF0378 protein	-	-	XP_011649685.1|-57.7|PREDICTED: uncharacterized protein LOC101207547 isoform X2 [Cucumis sativus]
c217104_g2	biological_process:protein ubiquitination(GO:0016567);;molecular_function:protein binding(GO:0005515);;molecular_function:kinase binding(GO:0019900);;molecular_function:protein binding(GO:0005515);;biological_process:cell division(GO:0051301);;molecular_function:protein binding(GO:0005515);;molecular_function:protein binding(GO:0005515);;molecular_function:protein binding(GO:0005515);;molecular_f…	egu:105042540|-203.2|K03363|CDC20; cell division cycle 20, cofactor of APC complex|ko04120|Ubiquitin mediated proteolysis;;	4641.GSMUA_Achr11P23470_001|-200.8|ENOG410XQ8I|D|Cell division cycle 20	-	Q9SZA4|CDC21_ARATH|-173.6|Cell division cycle 20.1, cofactor of APC complex OS=Arabidopsis thaliana GN=CDC20-1 PE=1 SV=1	XP_020260680.1|-215.4|cell division cycle 20.2, cofactor of APC complex-like [Asparagus officinalis]
c210262_g1	cellular_component:nucleus(GO:0005634);;biological_process:DNA repair(GO:0006281);;biological_process:DNA recombination(GO:0006310);;biological_process:cellular response to DNA damage stimulus(GO:0006974);;biological_process:cell cycle(GO:0007049);;molecular_function:hydrolase activity(GO:0016787);;molecular_function:metal ion binding(GO:0046872);;biological_process:cell division(GO:0051301);;bio…	pda:103713770|-108.3|K10882|EME1, MMS4; crossover junction endonuclease EME1 [EC:3.1.22.-]|ko03440|Homologous recombination;;	4641.GSMUA_Achr6P02950_001|-85.5|ENOG410ZQHK|L|Interacts with MUS81 to form a DNA structure-specific endonuclease with substrate preference for branched DNA structures with a 5'-end at the branch nick. Typical substrates include 3'- flap structures, D-loops, replication forks, nicked Holliday junctions and also intact Holliday junctions with a reduced efficiency. May be required in mitosis for th…	-	C5H8J1|EME1B_ARATH|-75.8|Crossover junction endonuclease EME1B OS=Arabidopsis thaliana GN=EME1B PE=1 SV=1	XP_020241384.1|-126.2|crossover junction endonuclease EME1B isoform X2 [Asparagus officinalis]
c193513_g1	cellular_component:plastid(GO:0009536);;cellular_component:membrane(GO:0016020);;cellular_component:integral component of membrane(GO:0016021);;molecular_function:hydrolase activity(GO:0016787);;cellular_component:chloroplast membrane(GO:0031969);;biological_process:proteolysis(GO:0006508);;molecular_function:peptidase activity(GO:0008233);;cellular_component:chloroplast(GO:0009507)	-	4641.GSMUA_Achr6P09910_001|-92.4|COG0705|S|rhomboid family	-	Q9FFX0|RBL9_ARATH|-73.1|RHOMBOID-like protein 9, chloroplastic OS=Arabidopsis thaliana GN=RBL9 PE=2 SV=1	XP_020247603.1|-105.9|RHOMBOID-like protein 9, chloroplastic isoform X3 [Asparagus officinalis]
c176782_g1	biological_process:nucleotide biosynthetic process(GO:0009165);;cellular_component:chloroplast(GO:0009507);;cellular_component:chloroplast(GO:0009507);;cellular_component:plastid(GO:0009536);;molecular_function:kinase activity(GO:0016301);;biological_process:phosphorylation(GO:0016310);;molecular_function:transferase activity(GO:0016740);;molecular_function:metal ion binding(GO:0046872);;molecula…	egu:105059573|-122.0|K00948|PRPS, prsA; ribose-phosphate pyrophosphokinase [EC:2.7.6.1]|ko00230|Purine metabolism;;ko01230|Biosynthesis of amino acids;;ko00030|Pentose phosphate pathway;;ko01200|Carbon metabolism;;	4641.GSMUA_Achr11P07820_001|-121.6|COG0462|F|Phosphoribosyl pyrophosphate synthase	-	Q6Z2L5|KPRS1_ORYSJ|-118.3|Ribose-phosphate pyrophosphokinase 1, chloroplastic OS=Oryza sativa subsp. japonica GN=Os02g0127700 PE=2 SV=2	XP_020241775.1|-122.3|ribose-phosphate pyrophosphokinase 1-like [Asparagus officinalis]
c221342_g1	-	-	4641.GSMUA_Achr2P19670_001|-210.5|COG0438|M|Glycosyl transferase (Group 1	PF16994.3|Glyco_trans_4_5|1.5e-61|Glycosyl-transferase family 4	-	OAY77629.1|-218.1|hypothetical protein ACMD2_13452 [Ananas comosus]
c176782_g2	-	pda:103697673|-49.3|K00948|PRPS, prsA; ribose-phosphate pyrophosphokinase [EC:2.7.6.1]|ko00230|Purine metabolism;;ko01230|Biosynthesis of amino acids;;ko00030|Pentose phosphate pathway;;ko01200|Carbon metabolism;;	-	-	-	XP_020241775.1|-55.7|ribose-phosphate pyrophosphokinase 1-like [Asparagus officinalis]
c268330_g1	-	stax:MC45_13180|-55.6|K03431|glmM; phosphoglucosamine mutase [EC:5.4.2.10]|ko00520|Amino sugar and nucleotide sugar metabolism;;	-	-	-	WP_066484365.1|-70.3|phosphoglucosamine mutase [Sphingomonas sp. CCH9-F2]
c250016_g1	cellular_component:lysosome(GO:0005764);;cellular_component:lysosomal membrane(GO:0005765);;cellular_component:endosome(GO:0005768);;cellular_component:spindle(GO:0005819);;cellular_component:cytoskeleton(GO:0005856);;biological_process:cell cycle(GO:0007049);;biological_process:chromosome segregation(GO:0007059);;cellular_component:membrane(GO:0016020);;cellular_component:late endosome membrane(…	-	4555.Si018040m|-92.6|ENOG410XNUK|S|ADP-ribosylation factor-like	-	Q8W4C8|ARL8C_ARATH|-93.0|ADP-ribosylation factor-like protein 8c OS=Arabidopsis thaliana GN=ARL8C PE=2 SV=1	XP_006482114.1|-92.2|PREDICTED: ADP-ribosylation factor-like protein 8B [Citrus sinensis]
c214910_g2	-	-	4641.GSMUA_Achr1P13870_001|-94.8|COG0464|O|Aaa atpase	-	-	XP_020272100.1|-100.6|uncharacterized protein LOC109847271 [Asparagus officinalis]
c30399_g1	-	-	4533.OB01G35740.1|-52.3|COG5251|K|TAF11 RNA polymerase II, TATA box binding protein (TBP)-associated factor	-	-	-
c221568_g4	-	-	15368.BRADI3G08770.1|-136.0|COG4886|S|leucine Rich Repeat	-	-	XP_020248573.1|-141.6|protein phosphatase 1 regulatory subunit pprA [Asparagus officinalis]
c237851_g1	-	mnr:ACZ75_09810|-49.1|K01749|hemC, HMBS; hydroxymethylbilane synthase [EC:2.5.1.61]|ko00860|Porphyrin and chlorophyll metabolism;;	-	-	-	WP_081897627.1|-49.2|hydroxymethylbilane synthase [Massilia sp. BSC265]
c174833_g1	molecular_function:protein binding(GO:0005515);;molecular_function:protein binding(GO:0005515);;molecular_function:ATP binding(GO:0005524);;cellular_component:nucleus(GO:0005634);;cellular_component:nucleus(GO:0005634);;biological_process:mRNA processing(GO:0006397);;biological_process:transport(GO:0006810);;biological_process:RNA splicing(GO:0008380);;molecular_function:hydrolase activity(GO:001…	-	3694.POPTR_0006s26940.1|-225.7|COG0513|L|purine NTP-dependent helicase activity	-	Q9LFN6|RH56_ARATH|-222.8|DEAD-box ATP-dependent RNA helicase 56 OS=Arabidopsis thaliana GN=RH56 PE=1 SV=2	XP_010254382.1|-225.5|PREDICTED: DEAD-box ATP-dependent RNA helicase 56 [Nelumbo nucifera]
c329687_g1	-	-	-	-	-	WP_060979038.1|-50.2|MULTISPECIES: VIT family protein [Proteobacteria]
c226771_g3	-	-	39947.LOC_Os03g30860.1|-55.9|COG2801|L|Retrotransposon protein	-	-	CAN83392.1|-65.3|hypothetical protein VITISV_041406 [Vitis vinifera]
c227016_g2	cellular_component:membrane(GO:0016020);;cellular_component:integral component of membrane(GO:0016021);;biological_process:transport(GO:0006810);;biological_process:amino acid transport(GO:0006865);;cellular_component:membrane(GO:0016020)	-	4641.GSMUA_Achr1P03170_001|-150.5|COG0814|E|amino acid transport	PF01490.16|Aa_trans|1.8e-60|Transmembrane amino acid transporter protein	F4IUW3|AVT1C_ARATH|-148.2|Amino acid transporter AVT1C OS=Arabidopsis thaliana GN=AVT1C PE=1 SV=1	XP_008813474.1|-173.2|PREDICTED: vacuolar amino acid transporter 1-like isoform X4 [Phoenix dactylifera]
c311229_g1	-	-	-	-	-	ESZ88302.1|-61.2|TonB-denpendent receptor [Blastomonas sp. CACIA14H2]
c123076_g1	-	-	-	-	-	WP_066283925.1|-62.1|hypothetical protein [Blastomonas sp. CCH1-A6]
c215691_g5	-	-	15368.BRADI3G51872.1|-151.9|ENOG4111F5T|S|Pfam:DUF248	-	-	XP_010930346.1|-175.3|PREDICTED: uncharacterized protein LOC105051545 [Elaeis guineensis]
c92561_g1	-	-	-	-	-	WP_068863427.1|-53.2|TrwC protein [Porphyrobacter dokdonensis]
c304859_g1	-	-	-	-	-	SDO45173.1|-68.3|cyclic beta-1,2-glucan synthetase [Phyllobacterium sp. OV277]
c202662_g3	molecular_function:ATP binding(GO:0005524);;cellular_component:plasma membrane(GO:0005886);;cellular_component:plasma membrane(GO:0005886);;cellular_component:membrane(GO:0016020);;cellular_component:integral component of membrane(GO:0016021);;molecular_function:kinase activity(GO:0016301);;biological_process:phosphorylation(GO:0016310);;molecular_function:transferase activity(GO:0016740);;molecu…	-	4555.Si000884m|-213.6|COG0515|T|Serine Threonine protein kinase	-	Q9C823|Y1523_ARATH|-190.6|C-type lectin receptor-like tyrosine-protein kinase At1g52310 OS=Arabidopsis thaliana GN=At1g52310 PE=2 SV=1	XP_020107106.1|-221.8|C-type lectin receptor-like tyrosine-protein kinase At1g52310 [Ananas comosus]
c224822_g1	biological_process:carbohydrate metabolic process(GO:0005975)	-	4641.GSMUA_Achr7P23930_001|-175.3|ENOG4110MRX|T|snf1-related protein kinase regulatory subunit	-	Q9CAR3|KINGL_ARATH|-153.1|SNF1-related protein kinase regulatory subunit gamma-1-like OS=Arabidopsis thaliana GN=CBSCBS2 PE=1 SV=1	XP_020243957.1|-173.4|SNF1-related protein kinase regulatory subunit gamma-1-like [Asparagus officinalis]
c180097_g1	biological_process:ion transport(GO:0006811);;biological_process:calcium ion transport(GO:0006816);;biological_process:defense response(GO:0006952);;cellular_component:membrane(GO:0016020);;cellular_component:membrane(GO:0016020);;cellular_component:integral component of membrane(GO:0016021);;biological_process:regulation of ion transmembrane transport(GO:0034765);;biological_process:calcium ion …	-	39947.LOC_Os01g48680.1|-295.1|ENOG410XZT8|U|Two pore segment channel 1	-	Q5QM84|TPC1_ORYSJ|-296.4|Two pore calcium channel protein 1 OS=Oryza sativa subsp. japonica GN=TPC1 PE=1 SV=2	XP_020266604.1|-10000.0|two pore calcium channel protein 1 [Asparagus officinalis]
c224966_g1	molecular_function:nucleotide binding(GO:0000166);;molecular_function:ATP binding(GO:0005524)	-	29760.VIT_05s0102g00260.t01|-10000.0|COG0464|O|Aaa atpase	-	F4IAE9|Y1591_ARATH|-10000.0|ATPase family AAA domain-containing protein At1g05910 OS=Arabidopsis thaliana GN=At1g05910 PE=2 SV=1	XP_020261514.1|-10000.0|ATPase family AAA domain-containing protein At1g05910 [Asparagus officinalis]
c92561_g2	-	-	-	-	-	WP_068863427.1|-62.9|TrwC protein [Porphyrobacter dokdonensis]
c254195_g1	-	-	-	-	-	WP_066922710.1|-55.5|hypothetical protein [Methylobacterium sp. CCH5-D2]
c145236_g1	-	-	-	-	-	WP_060979660.1|-84.4|MULTISPECIES: cytochrome P450 [Proteobacteria]
c127868_g1	-	-	-	-	-	WP_082167579.1|-75.7|hypothetical protein [Methylobacterium aquaticum]
c127724_g1	-	-	-	-	-	WP_066214294.1|-166.4|type-IV secretion system protein TraC [Blastomonas sp. CCH5-A3]
c156790_g1	-	sjp:SJA_C1-06920|-57.3|K09457|queF; 7-cyano-7-deazaguanine reductase [EC:1.7.1.13]|ko00790|Folate biosynthesis;;	-	-	-	WP_060980213.1|-64.2|MULTISPECIES: 7-cyano-7-deazaguanine reductase [Proteobacteria]
c208254_g1	molecular_function:nucleotide binding(GO:0000166);;molecular_function:ATP binding(GO:0005524);;cellular_component:microtubule(GO:0005874)	-	4641.GSMUA_Achr1P04040_001|-249.9|COG5059|Z|Kinesin family member	PF00225.21|Kinesin|6.3e-112|Kinesin motor domain	B9FAF3|KN14E_ORYSJ|-229.1|Kinesin-like protein KIN-14E OS=Oryza sativa subsp. japonica GN=KIN14E PE=2 SV=1	XP_020263625.1|-275.1|LOW QUALITY PROTEIN: kinesin-like protein KIN-14E [Asparagus officinalis]
c231110_g3	molecular_function:ATP binding(GO:0005524);;cellular_component:nucleus(GO:0005634);;cellular_component:nucleus(GO:0005634);;cellular_component:cytoplasm(GO:0005737);;cellular_component:cytoplasm(GO:0005737);;cellular_component:cytoplasm(GO:0005737);;biological_process:transcription, DNA-templated(GO:0006351);;biological_process:regulation of transcription, DNA-templated(GO:0006355);;biological_pr…	dosa:Os11t0703900-01|-110.9|K03283|HSPA1_8; heat shock 70kDa protein 1/8|ko04141|Protein processing in endoplasmic reticulum;;ko03040|Spliceosome;;ko04144|Endocytosis;;	4538.ORGLA11G0189300.1|-112.1|COG0443|O|Heat shock protein	PF00012.18|HSP70|1.3e-97|Hsp70 protein	P22953|MD37E_ARATH|-111.7|Probable mediator of RNA polymerase II transcription subunit 37e OS=Arabidopsis thaliana GN=MED37E PE=1 SV=3	ONK67768.1|-110.5|uncharacterized protein A4U43_C05F3570 [Asparagus officinalis]
c157097_g1	-	-	4533.OB04G33820.1|-86.0|ENOG4111NJH|S|RNA recognition motif containing protein	-	-	XP_020255579.1|-97.1|binding partner of ACD11 1 isoform X3 [Asparagus officinalis]
c156316_g1	-	nar:Saro_2386|-52.4|K01768|E4.6.1.1; adenylate cyclase [EC:4.6.1.1]|ko00230|Purine metabolism;;	-	-	-	WP_033924915.1|-63.5|adenylate/guanylate cyclase domain-containing protein [Sphingomonas sp. 35-24ZXX]
c196462_g1	molecular_function:oxidoreductase activity(GO:0016491);;molecular_function:metal ion binding(GO:0046872);;biological_process:oxidation-reduction process(GO:0055114)	-	4641.GSMUA_Achr11P21020_001|-78.5|COG3491|S|2OGFe(II) oxygenase	-	Q39224|SRG1_ARATH|-70.1|Protein SRG1 OS=Arabidopsis thaliana GN=SRG1 PE=2 SV=1	XP_020248529.1|-84.5|S-norcoclaurine synthase 1-like [Asparagus officinalis]
c231110_g5	molecular_function:nucleotide binding(GO:0000166);;molecular_function:ATP binding(GO:0005524)	osa:4351208|-56.0|K03283|HSPA1_8; heat shock 70kDa protein 1/8|ko04141|Protein processing in endoplasmic reticulum;;ko03040|Spliceosome;;ko04144|Endocytosis;;	39947.LOC_Os11g47760.1|-57.3|COG0443|O|Heat shock protein	-	P27322|HSP72_SOLLC|-55.8|Heat shock cognate 70 kDa protein 2 OS=Solanum lycopersicum GN=HSC-2 PE=2 SV=1	AKA66302.1|-55.1|heat shock protein 70, partial [Siniperca chuatsi]
c223798_g1	-	-	4555.Si000125m|-52.4|COG4886|S|leucine Rich Repeat	-	-	XP_020260658.1|-59.4|probable LRR receptor-like serine/threonine-protein kinase At3g47570 [Asparagus officinalis]
c207086_g1	cellular_component:plasma membrane(GO:0005886);;cellular_component:plasma membrane(GO:0005886);;cellular_component:membrane(GO:0016020);;molecular_function:metal ion binding(GO:0046872);;molecular_function:GTPase activator activity(GO:0005096);;cellular_component:Golgi apparatus(GO:0005794);;cellular_component:Golgi apparatus(GO:0005794)	cit:102609248|-100.0|K12486|SMAP; stromal membrane-associated protein|ko04144|Endocytosis;;	4513.MLOC_6070.1|-91.4|COG5347|U|domain, ankyrin repeat and PH domain	-	Q9FVJ3|AGD12_ARATH|-94.3|ADP-ribosylation factor GTPase-activating protein AGD12 OS=Arabidopsis thaliana GN=AGD12 PE=1 SV=1	XP_009410311.1|-99.2|PREDICTED: ADP-ribosylation factor GTPase-activating protein AGD12 [Musa acuminata subsp. malaccensis]
c231110_g7	molecular_function:nucleotide binding(GO:0000166);;molecular_function:ATP binding(GO:0005524)	mtr:MTR_4g063710|-105.2|K03283|HSPA1_8; heat shock 70kDa protein 1/8|ko04141|Protein processing in endoplasmic reticulum;;ko03040|Spliceosome;;ko04144|Endocytosis;;	4113.PGSC0003DMT400023039|-106.3|COG0443|O|Heat shock protein	PF00012.18|HSP70|4.2e-85|Hsp70 protein	P27322|HSP72_SOLLC|-106.0|Heat shock cognate 70 kDa protein 2 OS=Solanum lycopersicum GN=HSC-2 PE=2 SV=1	XP_004505872.1|-104.5|PREDICTED: heat shock cognate 70 kDa protein 2 [Cicer arietinum]
c155004_g1	-	-	-	-	-	XP_010905374.1|-85.4|PREDICTED: uncharacterized protein LOC105032590 [Elaeis guineensis]
c218022_g1	-	-	4641.GSMUA_Achr4P21210_001|-234.6|COG0585|S|Responsible for synthesis of pseudouridine from uracil- 13 in transfer RNAs (By similarity)	PF01142.16|TruD|1e-75|tRNA pseudouridine synthase D (TruD)	-	XP_020256113.1|-259.4|multisubstrate pseudouridine synthase 7 [Asparagus officinalis]
c200182_g1	biological_process:auxin biosynthetic process(GO:0009851);;biological_process:auxin biosynthetic process(GO:0009851);;molecular_function:oxidoreductase activity(GO:0016491);;biological_process:oxidation-reduction process(GO:0055114);;molecular_function:indole-3-pyruvate monooxygenase activity(GO:0103075);;molecular_function:monooxygenase activity(GO:0004497);;cellular_component:cytoplasm(GO:00057…	egu:105032351|-168.3|K11816|YUCCA; indole-3-pyruvate monooxygenase [EC:1.14.13.168]|ko00380|Tryptophan metabolism;;	3847.GLYMA14G20670.1|-143.8|COG2072|P|Monooxygenase	-	Q8VZ59|YUC6_ARATH|-131.7|Indole-3-pyruvate monooxygenase YUCCA6 OS=Arabidopsis thaliana GN=YUC6 PE=1 SV=1	XP_020244693.1|-185.0|indole-3-pyruvate monooxygenase YUCCA2-like isoform X1 [Asparagus officinalis]
c210543_g1	biological_process:lipid catabolic process(GO:0016042);;molecular_function:hydrolase activity(GO:0016787);;cellular_component:extracellular region(GO:0005576);;cellular_component:extracellular region(GO:0005576);;biological_process:lipid metabolic process(GO:0006629)	-	29760.VIT_19s0090g01160.t01|-126.1|COG3240|S|GDSL esterase lipase	-	Q67ZI9|GDL48_ARATH|-118.2|GDSL esterase/lipase At2g42990 OS=Arabidopsis thaliana GN=At2g42990 PE=2 SV=1	XP_020265547.1|-136.9|GDSL esterase/lipase At2g04570-like [Asparagus officinalis]
c130650_g1	biological_process:transcription, DNA-templated(GO:0006351);;biological_process:regulation of transcription, DNA-templated(GO:0006355);;molecular_function:DNA binding(GO:0003677);;cellular_component:nucleus(GO:0005634);;cellular_component:nucleus(GO:0005634)	-	4113.PGSC0003DMT400023209|-56.0|COG5208|K|Nuclear transcription factor Y	-	Q9ZVL3|NFYC3_ARATH|-55.0|Nuclear transcription factor Y subunit C-3 OS=Arabidopsis thaliana GN=NFYC3 PE=1 SV=1	XP_010942521.1|-64.0|PREDICTED: nuclear transcription factor Y subunit C-6 [Elaeis guineensis]
c218166_g2	molecular_function:nuclease activity(GO:0004518);;molecular_function:endonuclease activity(GO:0004519);;molecular_function:ATP binding(GO:0005524);;cellular_component:nucleus(GO:0005634);;cellular_component:nucleus(GO:0005634);;molecular_function:hydrolase activity(GO:0016787);;biological_process:gene silencing by RNA(GO:0031047);;molecular_function:metal ion binding(GO:0046872);;molecular_functi…	-	4641.GSMUA_Achr5P10880_001|-222.6|COG1111|L|helicase	-	Q7XD96|DCL3B_ORYSJ|-253.2|Endoribonuclease Dicer homolog 3b OS=Oryza sativa subsp. japonica GN=DCL3B PE=3 SV=2	XP_010906745.1|-300.7|PREDICTED: endoribonuclease Dicer homolog 3b-like isoform X2 [Elaeis guineensis]
c229102_g1	cellular_component:nucleus(GO:0005634);;cellular_component:nucleus(GO:0005634);;cellular_component:nucleolus(GO:0005730);;biological_process:transcription, DNA-templated(GO:0006351);;biological_process:regulation of transcription, DNA-templated(GO:0006355);;molecular_function:hydrolase activity(GO:0016787);;molecular_function:metal ion binding(GO:0046872);;molecular_function:iron-sulfur cluster b…	-	4641.GSMUA_Achr10P11160_001|-117.8|COG0177|L|endonuclease III	-	Q9SJQ6|ROS1_ARATH|-109.9|Protein ROS1 OS=Arabidopsis thaliana GN=ROS1 PE=1 SV=2	XP_020260622.1|-120.3|protein ROS1-like isoform X2 [Asparagus officinalis]
c228609_g1	biological_process:auxin polar transport(GO:0009926);;cellular_component:membrane(GO:0016020);;cellular_component:membrane(GO:0016020);;cellular_component:integral component of membrane(GO:0016021);;molecular_function:metal ion binding(GO:0046872);;biological_process:multicellular organism development(GO:0007275);;biological_process:auxin-activated signaling pathway(GO:0009734);;biological_proces…	-	29760.VIT_14s0083g00960.t01|-10000.0|ENOG410XPP8|O|Ubiquitin protein ligase E3 component n-recognin 4	PF13764.4|E3_UbLigase_R4|0|E3 ubiquitin-protein ligase UBR4	B9G2A8|BIG_ORYSJ|-10000.0|Auxin transport protein BIG OS=Oryza sativa subsp. japonica GN=Os09g0247700 PE=2 SV=1	XP_008797599.1|-10000.0|PREDICTED: auxin transport protein BIG [Phoenix dactylifera]
c286267_g1	-	-	-	-	-	WP_066919093.1|-116.8|esterase [Methylobacterium sp. CCH5-D2]
c286123_g1	-	-	-	-	-	AIE71800.1|-61.6|helicase [Klebsiella michiganensis]
c221705_g1	-	-	4555.Si019133m|-61.4|COG0507|L|exodeoxyribonuclease v alpha	-	-	XP_006295778.1|-61.4|hypothetical protein CARUB_v10024900mg [Capsella rubella]
c221623_g1	-	-	4641.GSMUA_Achr7P19150_001|-89.4|ENOG4111S70|S|Melanoma antigen, family	-	-	XP_020255735.1|-95.1|non-structural maintenance of chromosomes element 3 homolog [Asparagus officinalis]
c211180_g2	-	-	3694.POPTR_0007s15440.1|-106.5|ENOG410XS82|S|Retrotransposon protein	-	-	XP_011004665.1|-107.8|PREDICTED: uncharacterized protein LOC105111104, partial [Populus euphratica]
c314096_g1	-	-	-	-	-	WP_059035331.1|-58.0|hypothetical protein [Stenotrophomonas maltophilia]
c211180_g4	-	-	3694.POPTR_0007s15440.1|-105.5|ENOG410XS82|S|Retrotransposon protein	-	-	XP_011004665.1|-101.4|PREDICTED: uncharacterized protein LOC105111104, partial [Populus euphratica]
c222260_g3	cellular_component:nucleus(GO:0005634);;cellular_component:nucleus(GO:0005634);;biological_process:cellular response to sulfur starvation(GO:0010438)	-	4641.GSMUA_Achr7P12290_001|-106.5|ENOG410YFAS|S|male sterility MS5 family protein	PF07727.12|RVT_2|6e-67|Reverse transcriptase (RNA-dependent DNA polymerase)	Q8GXU5|SDI1_ARATH|-94.0|Protein SULFUR DEFICIENCY-INDUCED 1 OS=Arabidopsis thaliana GN=SDI1 PE=2 SV=1	XP_008808718.1|-105.2|PREDICTED: protein SULFUR DEFICIENCY-INDUCED 1-like isoform X2 [Phoenix dactylifera]
c221623_g4	molecular_function:ATP binding(GO:0005524);;cellular_component:cytoplasm(GO:0005737);;cellular_component:cytosol(GO:0005829);;molecular_function:kinase activity(GO:0016301);;biological_process:phosphorylation(GO:0016310);;molecular_function:transferase activity(GO:0016740);;molecular_function:nucleotide binding(GO:0000166);;molecular_function:protein serine/threonine kinase activity(GO:0004674);;…	-	29760.VIT_18s0166g00290.t01|-157.1|COG0515|T|Serine Threonine protein kinase	PF07714.15|Pkinase_Tyr|2.6e-71|Protein tyrosine kinase	F4JTP5|STY46_ARATH|-118.3|Serine/threonine-protein kinase STY46 OS=Arabidopsis thaliana GN=STY46 PE=1 SV=1	ONK57114.1|-169.8|uncharacterized protein A4U43_C10F16760 [Asparagus officinalis]
c101197_g1	cellular_component:ribosome(GO:0005840);;cellular_component:intracellular ribonucleoprotein complex(GO:0030529)	pda:103702308|-57.6|K02910|RP-L31e, RPL31; large subunit ribosomal protein L31e|ko03010|Ribosome;;	4641.GSMUA_Achr6P03460_001|-58.3|COG2097|J|(ribosomal) protein	-	Q9M573|RL31_PERFR|-55.1|60S ribosomal protein L31 OS=Perilla frutescens GN=RPL31 PE=2 SV=1	XP_020242948.1|-57.7|60S ribosomal protein L31-like [Asparagus officinalis]
c301067_g1	-	-	-	-	-	WP_060978062.1|-63.7|MULTISPECIES: AcrB/AcrD/AcrF family protein [Proteobacteria]
c231679_g1	-	-	-	-	-	XP_018841984.1|-62.6|PREDICTED: potassium channel AKT2/3-like [Juglans regia]
c151642_g1	-	-	-	-	-	XP_020243118.1|-48.2|serine/threonine-protein kinase STY46 isoform X1 [Asparagus officinalis]
c231535_g1	-	-	29760.VIT_04s0008g01480.t01|-167.2|COG0144|J|nOP2 Sun	-	-	XP_020250388.1|-175.8|LOW QUALITY PROTEIN: probable 28S rRNA (cytosine-C(5))-methyltransferase [Asparagus officinalis]
c198692_g1	-	-	4577.GRMZM2G110567_P01|-77.6|COG2304|S|von Willebrand factor, type A	-	-	OAY43502.1|-79.0|hypothetical protein MANES_08G075100 [Manihot esculenta]
c197911_g1	molecular_function:metal ion binding(GO:0046872);;molecular_function:iron-sulfur cluster binding(GO:0051536);;molecular_function:2 iron, 2 sulfur cluster binding(GO:0051537);;cellular_component:chloroplast(GO:0009507);;cellular_component:chloroplast(GO:0009507);;cellular_component:plastid(GO:0009536)	-	4641.GSMUA_Achr5P14210_001|-97.3|COG0278|O|Glutaredoxin	-	Q2QX01|GRS12_ORYSJ|-89.3|Monothiol glutaredoxin-S12, chloroplastic OS=Oryza sativa subsp. japonica GN=GRXS12 PE=2 SV=1	XP_020252677.1|-101.2|monothiol glutaredoxin-S12, chloroplastic isoform X2 [Asparagus officinalis]
c228078_g4	-	-	4081.Solyc04g024340.2.1|-59.5|COG1963|S|Acid phosphatase vanadium-dependent haloperoxidase related	-	-	XP_020249551.1|-67.3|uncharacterized protein LOC109826952 [Asparagus officinalis]
c225740_g1	-	-	4555.Si001940m|-56.3|COG5066|U|Central component in molecular interactions underlying sperm crawling. Forms an extensive filament system that extends from sperm villipoda, along the leading edge of the pseudopod (By similarity)	-	-	XP_020275750.1|-67.6|vesicle-associated protein 1-3-like [Asparagus officinalis]
c214660_g2	-	-	4641.GSMUA_Achr7P06090_001|-95.2|COG5102|U|SFT2 domain containing	-	-	XP_008782994.1|-94.9|PREDICTED: protein transport protein SFT2 [Phoenix dactylifera]
c231535_g2	biological_process:negative regulation of abscisic acid-activated signaling pathway(GO:0009788);;cellular_component:nucleus(GO:0005634);;molecular_function:metal ion binding(GO:0046872);;cellular_component:nucleus(GO:0005634);;biological_process:regulation of defense response to fungus(GO:1900150);;biological_process:transcription, DNA-templated(GO:0006351);;biological_process:regulation of trans…	-	3694.POPTR_0022s00900.1|-69.3|COG5048|S|Zinc finger protein	-	Q2V3L3|YY1_ARATH|-61.0|Zinc finger transcription factor YY1 OS=Arabidopsis thaliana GN=YY1 PE=1 SV=1	ABK96475.1|-67.3|unknown [Populus trichocarpa x Populus deltoides]
c254476_g1	-	-	-	-	-	WP_066046225.1|-55.3|conjugal transfer protein TrbF [Blastomonas sp. CCH15-G10]
c226129_g1	-	-	-	-	-	XP_020263367.1|-63.2|uncharacterized protein LOC109839349 [Asparagus officinalis]
c209398_g1	-	-	-	-	-	XP_020268673.1|-73.2|mediator of RNA polymerase II transcription subunit 15-like [Asparagus officinalis]
c222486_g8	-	-	3694.POPTR_1512s00200.1|-65.2|ENOG410XS82|S|Retrotransposon protein	-	-	XP_019262091.1|-92.9|PREDICTED: uncharacterized protein LOC109239939 [Nicotiana attenuata]
c215049_g2	-	-	4641.GSMUA_Achr1P02070_001|-56.1|ENOG410Y9A0|S|HLH	-	-	XP_020260240.1|-80.6|transcription factor bHLH111-like isoform X2 [Asparagus officinalis]
c208535_g1	molecular_function:oxidoreductase activity(GO:0016491);;molecular_function:cinnamyl-alcohol dehydrogenase activity(GO:0045551);;molecular_function:metal ion binding(GO:0046872);;molecular_function:sinapyl alcohol dehydrogenase activity(GO:0052747);;biological_process:oxidation-reduction process(GO:0055114);;biological_process:phenylpropanoid biosynthetic process(GO:0009699);;biological_process:li…	vvi:100244482|-163.2|K00083|E1.1.1.195; cinnamyl-alcohol dehydrogenase [EC:1.1.1.195]|ko00940|Phenylpropanoid biosynthesis;;	3694.POPTR_0011s15120.1|-164.9|COG1064|C|alcohol dehydrogenase	-	Q9CAI3|CADH1_ARATH|-152.0|Probable cinnamyl alcohol dehydrogenase 1 OS=Arabidopsis thaliana GN=CAD1 PE=2 SV=1	XP_020247509.1|-168.3|probable cinnamyl alcohol dehydrogenase 1 [Asparagus officinalis]
c209172_g1	molecular_function:hydrolase activity(GO:0016787);;biological_process:proteolysis(GO:0006508);;molecular_function:peptidase activity(GO:0008233);;molecular_function:cysteine-type peptidase activity(GO:0008234)	-	4641.GSMUA_Achr3P01000_001|-207.2|COG4870|O|cathepsin	PF00112.21|Peptidase_C1|1.2e-86|Papain family cysteine protease	P25776|ORYA_ORYSJ|-203.7|Oryzain alpha chain OS=Oryza sativa subsp. japonica GN=Os04g0650000 PE=1 SV=2	XP_020270735.1|-219.7|oryzain alpha chain-like [Asparagus officinalis]
c201775_g1	-	-	4533.OB01G36050.1|-74.7|ENOG410YZBK|S|protein regulator of cytokinesis	-	-	XP_008800929.1|-82.9|PREDICTED: 65-kDa microtubule-associated protein 3 isoform X2 [Phoenix dactylifera]
c231535_g4	cellular_component:chloroplast(GO:0009507);;cellular_component:plastid(GO:0009536);;molecular_function:transferase activity(GO:0016740);;biological_process:tetrahydrofolate interconversion(GO:0035999);;molecular_function:glycine hydroxymethyltransferase activity(GO:0004372);;biological_process:one-carbon metabolic process(GO:0006730);;cellular_component:chloroplast(GO:0009507)	mus:103968848|-117.0|K00600|glyA, SHMT; glycine hydroxymethyltransferase [EC:2.1.2.1]|ko00260|Glycine, serine and threonine metabolism;;ko01200|Carbon metabolism;;ko00630|Glyoxylate and dicarboxylate metabolism;;ko00460|Cyanoamino acid metabolism;;ko00670|One carbon pool by folate;;ko01230|Biosynthesis of amino acids;;	3694.POPTR_0006s24840.1|-115.7|COG0112|E|Catalyzes the reversible interconversion of serine and glycine with tetrahydrofolate (THF) serving as the one-carbon carrier. This reaction serves as the major source of one-carbon groups required for the biosynthesis of purines, thymidylate, methionine, and other important biomolecules. Also exhibits THF- independent aldolase activity toward beta-hydroxya…	PF00464.17|SHMT|6.3e-108|Serine hydroxymethyltransferase	Q94JQ3|GLYP3_ARATH|-110.0|Serine hydroxymethyltransferase 3, chloroplastic OS=Arabidopsis thaliana GN=SHM3 PE=1 SV=2	XP_020268921.1|-124.0|serine hydroxymethyltransferase 3, chloroplastic-like [Asparagus officinalis]
c231535_g5	-	-	15368.BRADI5G22790.1|-273.2|ENOG410XPHI|S|SDA1 domain containing 1	PF05285.10|SDA1|3e-69|SDA1	-	XP_020269162.1|-305.5|protein SDA1 homolog [Asparagus officinalis]
c230223_g1	-	-	39947.LOC_Os02g12320.1|-101.0|COG2801|L|Retrotransposon protein	-	-	CAN61139.1|-105.3|hypothetical protein VITISV_009489 [Vitis vinifera]
c169095_g1	-	-	4641.GSMUA_Achr8P27150_001|-54.4|COG0526|O|Thioredoxin	-	-	XP_020265160.1|-56.9|thioredoxin-like protein CITRX1, chloroplastic [Asparagus officinalis]
c168314_g2	-	-	-	-	-	WP_060978320.1|-86.6|MULTISPECIES: DUF490 domain-containing protein [Proteobacteria]
c161554_g1	-	-	-	-	-	ABQ96641.1|-95.2|replicase, partial [Garlic virus B1]
c197380_g2	-	pda:103715360|-117.5|K14001|SIL1, SLS1; nucleotide exchange factor SIL1|ko04141|Protein processing in endoplasmic reticulum;;	4641.GSMUA_Achr11P20040_001|-112.4|ENOG410XSBC|S|Nucleotide exchange factor Fes1	-	-	XP_020262670.1|-126.9|hsp70 nucleotide exchange factor FES1 [Asparagus officinalis]
c160917_g1	molecular_function:peptidase activity(GO:0008233);;molecular_function:metallopeptidase activity(GO:0008237);;cellular_component:membrane(GO:0016020);;cellular_component:integral component of membrane(GO:0016021);;molecular_function:hydrolase activity(GO:0016787);;molecular_function:metal ion binding(GO:0046872);;cellular_component:endoplasmic reticulum(GO:0005783);;cellular_component:endoplasmic …	egu:105043320|-211.7|K06013|STE24; STE24 endopeptidase [EC:3.4.24.84]|ko00900|Terpenoid backbone biosynthesis;;	4641.GSMUA_Achr3P18090_001|-211.2|COG0501|O|Protease HtpX homolog	PF16491.3|Peptidase_M48_N|1.5e-68|CAAX prenyl protease N-terminal, five membrane helices	Q6EPN8|FACE1_ORYSJ|-204.4|CAAX prenyl protease 1 homolog OS=Oryza sativa subsp. japonica GN=FACE1 PE=2 SV=1	XP_020261800.1|-215.4|CAAX prenyl protease 1 homolog [Asparagus officinalis]
c207223_g2	-	-	-	-	-	WP_060980322.1|-134.3|MULTISPECIES: ABC transporter ATP-binding protein [Proteobacteria]
c190002_g2	-	-	-	-	-	WP_066280760.1|-62.0|EamA family transporter [Blastomonas sp. CCH1-A6]
c21542_g1	-	pda:103703647|-156.9|K12606|RCD1, CNOT9, CAF40; CCR4-NOT transcription complex subunit 9|ko03018|RNA degradation;;	4641.GSMUA_Achr10P08440_001|-153.8|COG5209|S|cell differentiation protein Rcd1	PF04078.11|Rcd1|2.5e-131|Cell differentiation family, Rcd1-like	-	XP_008784791.1|-156.1|PREDICTED: cell differentiation protein RCD1 homolog [Phoenix dactylifera]
c314233_g1	-	-	-	-	-	SDP88069.1|-49.0|Glycosyltransferase involved in cell wall bisynthesis [Phyllobacterium sp. OV277]
c251215_g1	-	-	-	-	-	SFF81903.1|-74.1|hypothetical protein SAMN04487844_15227, partial [Methylobacterium sp. yr596]
c108794_g1	-	pda:103713953|-258.6|K06100|SYMPK; symplekin|ko03015|mRNA surveillance pathway;;	3711.Bra010931.1-P|-199.4|ENOG410XQAS|S|Symplekin	PF12295.6|Symplekin_C|2.5e-59|Symplekin tight junction protein C terminal	-	ONK67776.1|-252.1|uncharacterized protein A4U43_C05F3650 [Asparagus officinalis]
c171322_g1	cellular_component:chloroplast stroma(GO:0009570);;molecular_function:lyase activity(GO:0016829);;molecular_function:carbonate dehydratase activity(GO:0004089);;cellular_component:chloroplast(GO:0009507);;cellular_component:plastid(GO:0009536)	pda:103715836|-83.8|K01673|cynT, can; carbonic anhydrase [EC:4.2.1.1]|ko00910|Nitrogen metabolism;;	4641.GSMUA_Achr6P27350_001|-79.8|COG0288|P|carbonic anhydrase	-	P17067|CAHC_PEA|-79.5|Carbonic anhydrase, chloroplastic OS=Pisum sativum PE=1 SV=1	XP_020255397.1|-97.7|carbonic anhydrase 2-like isoform X1 [Asparagus officinalis]
c206199_g2	-	-	29760.VIT_05s0049g01220.t01|-59.9|ENOG410XQC0|T|serine threonine-protein kinase	-	-	XP_020247808.1|-57.8|serine/threonine-protein kinase tricorner-like [Asparagus officinalis]
c148322_g1	-	-	4641.GSMUA_Achr1P18420_001|-77.5|ENOG4111H9K|S|Craniofacial development protein	-	-	XP_020262768.1|-82.2|LOW QUALITY PROTEIN: uncharacterized protein LOC109838762 [Asparagus officinalis]
c210293_g1	biological_process:transport(GO:0006810);;cellular_component:membrane(GO:0016020);;cellular_component:integral component of membrane(GO:0016021);;cellular_component:mitochondrion(GO:0005739);;cellular_component:mitochondrial inner membrane(GO:0005743);;cellular_component:mitochondrial inner membrane(GO:0005743)	-	4641.GSMUA_Achr6P30940_001|-139.2|ENOG410ZRF1|S|Solute carrier family 25	-	Q9LJX5|BRTL1_ARATH|-124.1|Probable mitochondrial adenine nucleotide transporter BTL1 OS=Arabidopsis thaliana GN=At3g20240 PE=2 SV=1	XP_020267514.1|-147.1|probable mitochondrial adenine nucleotide transporter BTL1 [Asparagus officinalis]
c193626_g1	cellular_component:cytoplasm(GO:0005737);;cellular_component:cytosol(GO:0005829);;biological_process:multicellular organism development(GO:0007275);;biological_process:auxin-activated signaling pathway(GO:0009734);;molecular_function:kinase activity(GO:0016301);;biological_process:phosphorylation(GO:0016310);;molecular_function:transferase activity(GO:0016740);;biological_process:cotyledon develo…	-	3702.AT2G34650.1|-113.6|ENOG410XQ0C|T|serine threonine-protein kinase	-	O64682|PID_ARATH|-114.8|Protein kinase PINOID OS=Arabidopsis thaliana GN=PID PE=1 SV=1	XP_020599778.1|-116.7|LOW QUALITY PROTEIN: protein kinase PINOID-like [Phalaenopsis equestris]
c141480_g1	-	-	-	-	-	WP_066282946.1|-73.6|alkaline phosphatase [Blastomonas sp. CCH1-A6]
c221373_g1	cellular_component:endoplasmic reticulum(GO:0005783);;cellular_component:Golgi apparatus(GO:0005794);;cellular_component:Golgi apparatus(GO:0005794);;molecular_function:hydrolase activity(GO:0016787);;molecular_function:ceramidase activity(GO:0017040);;cellular_component:extracellular region(GO:0005576);;cellular_component:extracellular region(GO:0005576);;cellular_component:endoplasmic reticulum…	egu:105047518|-10000.0|K12349|ASAH2; neutral ceramidase [EC:3.5.1.23]|ko00600|Sphingolipid metabolism;;	4533.OB01G32680.1|-10000.0|ENOG410XQWE|S|Ceramidase	PF04734.11|Ceramidase_alk|1.1e-231|Neutral/alkaline non-lysosomal ceramidase, N-terminal	Q0JL46|NCASE_ORYSJ|-10000.0|Neutral ceramidase OS=Oryza sativa subsp. japonica GN=Os01g0624000 PE=1 SV=1	XP_020265585.1|-10000.0|neutral ceramidase-like isoform X1 [Asparagus officinalis]
c220736_g1	cellular_component:chloroplast(GO:0009507);;cellular_component:chloroplast(GO:0009507);;cellular_component:plastid(GO:0009536);;biological_process:chloroplast rRNA processing(GO:1901259);;molecular_function:RNA binding(GO:0003723);;biological_process:rRNA processing(GO:0006364);;cellular_component:chloroplast(GO:0009507)	-	4641.GSMUA_Achr8P29020_001|-178.4|ENOG41121F0|S|RAP domain	-	Q84MH1|RAP_ORYSJ|-175.5|RAP domain-containing protein, chloroplastic OS=Oryza sativa subsp. japonica GN=AL1 PE=2 SV=1	OTG05538.1|-186.0|putative RAP [Helianthus annuus]
c232453_g1	cellular_component:glyoxysome(GO:0009514);;cellular_component:glyoxysome(GO:0009514);;molecular_function:oxidoreductase activity(GO:0016491);;molecular_function:L-malate dehydrogenase activity(GO:0030060);;biological_process:oxidation-reduction process(GO:0055114);;cellular_component:peroxisome(GO:0005777);;biological_process:glyoxylate cycle(GO:0006097);;biological_process:tricarboxylic acid cyc…	mus:103980355|-173.3|K00026|MDH2; malate dehydrogenase [EC:1.1.1.37]|ko00710|Carbon fixation in photosynthetic organisms;;ko01200|Carbon metabolism;;ko00630|Glyoxylate and dicarboxylate metabolism;;ko00620|Pyruvate metabolism;;ko00020|Citrate cycle (TCA cycle);;ko00270|Cysteine and methionine metabolism;;	4641.GSMUA_Achr4P01380_001|-174.6|COG0039|C|Catalyzes the reversible oxidation of malate to oxaloacetate (By similarity)	-	P19446|MDHG_CITLA|-170.3|Malate dehydrogenase, glyoxysomal OS=Citrullus lanatus PE=1 SV=1	XP_009395011.1|-172.5|PREDICTED: malate dehydrogenase, glyoxysomal [Musa acuminata subsp. malaccensis]
c198973_g1	molecular_function:cinnamyl-alcohol dehydrogenase activity(GO:0045551);;molecular_function:metal ion binding(GO:0046872);;molecular_function:sinapyl alcohol dehydrogenase activity(GO:0052747);;biological_process:oxidation-reduction process(GO:0055114);;biological_process:phenylpropanoid biosynthetic process(GO:0009699);;biological_process:lignin biosynthetic process(GO:0009809);;molecular_functio…	nnu:104603648|-160.0|K00083|E1.1.1.195; cinnamyl-alcohol dehydrogenase [EC:1.1.1.195]|ko00940|Phenylpropanoid biosynthesis;;	4641.GSMUA_Achr5P11490_001|-156.9|COG1064|C|alcohol dehydrogenase	-	Q7XWU3|CADH6_ORYSJ|-151.4|Probable cinnamyl alcohol dehydrogenase 6 OS=Oryza sativa subsp. japonica GN=CAD6 PE=2 SV=2	XP_010266028.1|-159.2|PREDICTED: probable cinnamyl alcohol dehydrogenase 6 [Nelumbo nucifera]
c231816_g1	cellular_component:nucleus(GO:0005634);;biological_process:transcription, DNA-templated(GO:0006351);;biological_process:regulation of transcription, DNA-templated(GO:0006355);;biological_process:translation(GO:0006412);;biological_process:translational elongation(GO:0006414);;biological_process:embryo development ending in seed dormancy(GO:0009793);;molecular_function:translation elongation facto…	-	4641.GSMUA_Achr11P15640_001|-241.4|COG2183|K|domain protein	-	A8MS85|SPT61_ARATH|-209.0|Transcription elongation factor SPT6 homolog OS=Arabidopsis thaliana GN=SPT6 PE=1 SV=1	ONK61390.1|-257.6|uncharacterized protein A4U43_C08F29410 [Asparagus officinalis]
c181152_g1	biological_process:translational initiation(GO:0006413);;biological_process:regulation of translation(GO:0006417);;molecular_function:RNA binding(GO:0003723);;molecular_function:translation initiation factor activity(GO:0003743);;biological_process:translation(GO:0006412)	gmx:100499744|-100.1|K03259|EIF4E; translation initiation factor 4E|ko03013|RNA transport;;	3847.GLYMA02G08010.1|-99.4|COG5053|J|eukaryotic translation initiation factor	-	Q9FK59|IF4E5_ARATH|-94.0|Eukaryotic translation initiation factor NCBP OS=Arabidopsis thaliana GN=NCBP PE=2 SV=1	KRH08500.1|-99.3|hypothetical protein GLYMA_16G153800 [Glycine max]
c208816_g1	-	-	-	-	-	XP_020276225.1|-53.6|uncharacterized protein LOC109850589 [Asparagus officinalis]
c48126_g1	cellular_component:cytoplasmic vesicle membrane(GO:0030659);;cellular_component:cytoplasmic vesicle(GO:0031410);;cellular_component:clathrin-coated pit(GO:0005905);;cellular_component:clathrin-coated pit(GO:0005905);;cellular_component:membrane(GO:0016020)	-	4641.GSMUA_Achr11P04170_001|-76.5|ENOG410YB93|U|clathrin light chain	-	Q5Z402|CLC2_ORYSJ|-73.1|Clathrin light chain 2 OS=Oryza sativa subsp. japonica GN=Os06g0731800 PE=2 SV=1	XP_010940407.1|-78.2|PREDICTED: clathrin light chain 2 [Elaeis guineensis]
c227047_g1	cellular_component:membrane(GO:0016020);;cellular_component:membrane(GO:0016020);;cellular_component:integral component of membrane(GO:0016021);;molecular_function:nucleotide binding(GO:0000166);;molecular_function:ATP binding(GO:0005524);;biological_process:transport(GO:0006810)	-	4641.GSMUA_Achr9P16240_001|-146.2|COG0842|V|(ABC) transporter	-	Q5Z9S8|AB42G_ORYSJ|-120.4|ABC transporter G family member 42 OS=Oryza sativa subsp. japonica GN=ABCG42 PE=2 SV=1	ONK80619.1|-149.3|uncharacterized protein A4U43_C01F19860 [Asparagus officinalis]
c209679_g1	biological_process:chitin catabolic process(GO:0006032);;molecular_function:chitin binding(GO:0008061);;biological_process:metabolic process(GO:0008152);;molecular_function:hydrolase activity(GO:0016787);;molecular_function:hydrolase activity, acting on glycosyl bonds(GO:0016798);;biological_process:polysaccharide catabolic process(GO:0000272);;molecular_function:chitinase activity(GO:0004568);;b…	-	29760.VIT_06s0004g03830.t01|-117.6|ENOG410YAXH|G|chitinase	-	Q9SLP4|CHIT1_TULBA|-112.6|Chitinase 1 OS=Tulipa bakeri PE=1 SV=1	XP_008776499.1|-120.7|PREDICTED: chitinase 2-like [Phoenix dactylifera]
c76411_g2	-	-	-	-	-	WP_082773160.1|-70.8|histidine kinase [Methylobacterium sp. CCH5-D2]
c227047_g2	cellular_component:membrane(GO:0016020);;cellular_component:membrane(GO:0016020);;cellular_component:integral component of membrane(GO:0016021);;molecular_function:nucleotide binding(GO:0000166);;molecular_function:ATP binding(GO:0005524);;biological_process:transport(GO:0006810)	-	4641.GSMUA_Achr11P12360_001|-207.7|COG0842|V|(ABC) transporter	-	Q5Z9S8|AB42G_ORYSJ|-200.8|ABC transporter G family member 42 OS=Oryza sativa subsp. japonica GN=ABCG42 PE=2 SV=1	ONK80619.1|-220.9|uncharacterized protein A4U43_C01F19860 [Asparagus officinalis]
c220061_g1	cellular_component:cytoskeleton(GO:0005856);;cellular_component:microtubule(GO:0005874);;cellular_component:cell cortex(GO:0005938);;cellular_component:cell cortex(GO:0005938);;biological_process:negative regulation of microtubule depolymerization(GO:0007026);;biological_process:cell cycle(GO:0007049);;cellular_component:phragmoplast(GO:0009524);;cellular_component:phragmoplast(GO:0009524);;biolo…	-	3694.POPTR_0002s25450.1|-10000.0|ENOG410ZMY0|U|cytoplasmic linker associated protein	-	Q8RWY6|CLASP_ARATH|-10000.0|CLIP-associated protein OS=Arabidopsis thaliana GN=CLASP PE=1 SV=1	XP_008810808.1|-10000.0|PREDICTED: CLIP-associated protein-like isoform X1 [Phoenix dactylifera]
c133880_g1	-	-	-	-	-	WP_023836455.1|-51.2|MULTISPECIES: signal recognition particle-docking protein FtsY [Proteobacteria]
c213773_g1	-	-	29760.VIT_08s0040g01630.t01|-91.7|ENOG410XR87|S|Translin	-	-	XP_020248192.1|-100.0|translin [Asparagus officinalis]
c197661_g1	cellular_component:membrane(GO:0016020);;cellular_component:integral component of membrane(GO:0016021);;molecular_function:transferase activity(GO:0016740);;molecular_function:transferase activity, transferring glycosyl groups(GO:0016757);;cellular_component:endoplasmic reticulum(GO:0005783);;cellular_component:endoplasmic reticulum membrane(GO:0005789);;biological_process:protein glycosylation(G…	egu:105047433|-10000.0|K07151|STT3; dolichyl-diphosphooligosaccharide--protein glycosyltransferase [EC:2.4.99.18]|ko04141|Protein processing in endoplasmic reticulum;;ko00510|N-Glycan biosynthesis;;	4641.GSMUA_Achr7P24990_001|-10000.0|COG1287|S|oligosaccharyl transferase STT3 subunit	PF02516.12|STT3|6e-103|Oligosaccharyl transferase STT3 subunit	Q6F2Z1|STT3A_ORYSJ|-10000.0|Dolichyl-diphosphooligosaccharide--protein glycosyltransferase subunit STT3A OS=Oryza sativa subsp. japonica GN=STT3A PE=2 SV=1	XP_020264874.1|-10000.0|dolichyl-diphosphooligosaccharide--protein glycosyltransferase subunit STT3A [Asparagus officinalis]
c230648_g1	biological_process:fruit ripening(GO:0009835);;cellular_component:membrane(GO:0016020);;cellular_component:integral component of membrane(GO:0016021);;molecular_function:oxidoreductase activity(GO:0016491);;cellular_component:organelle membrane(GO:0031090);;cellular_component:intracellular membrane-bounded organelle(GO:0043231);;molecular_function:metal ion binding(GO:0046872);;biological_process…	-	29760.VIT_01s0137g00540.t01|-132.5|COG2124|Q|Cytochrome p450	PF00067.20|p450|1.7e-94|Cytochrome P450	P24465|C71A1_PERAE|-123.3|Cytochrome P450 71A1 OS=Persea americana GN=CYP71A1 PE=1 SV=2	ONK57596.1|-164.9|uncharacterized protein A4U43_C09F2110 [Asparagus officinalis]
c151392_g1	cellular_component:integral component of membrane(GO:0016021);;biological_process:multicellular organism development(GO:0007275);;cellular_component:membrane(GO:0016020);;cellular_component:membrane(GO:0016020)	-	4641.GSMUA_Achr10P14820_001|-124.1|COG2928|S|conserved protein	-	F4IUE7|COV1_ARATH|-115.2|Protein CONTINUOUS VASCULAR RING 1 OS=Arabidopsis thaliana GN=COV1 PE=1 SV=2	XP_008795061.1|-129.7|PREDICTED: protein LIKE COV 1-like [Phoenix dactylifera]
c562_g1	-	-	-	-	-	WP_066210314.1|-62.9|DUF885 domain-containing protein [Blastomonas sp. CCH5-E3]
c168739_g2	-	-	-	-	-	WP_066919128.1|-58.0|HlyD family type I secretion periplasmic adaptor subunit [Methylobacterium sp. CCH5-D2]
c230504_g2	cellular_component:membrane(GO:0016020);;cellular_component:membrane(GO:0016020);;cellular_component:integral component of membrane(GO:0016021);;molecular_function:kinase activity(GO:0016301);;biological_process:phosphorylation(GO:0016310);;molecular_function:transferase activity(GO:0016740);;molecular_function:nucleotide binding(GO:0000166);;molecular_function:protein serine/threonine kinase act…	-	4533.OB02G43350.1|-110.4|COG0515|T|Serine Threonine protein kinase	-	Q39191|WAK1_ARATH|-82.7|Wall-associated receptor kinase 1 OS=Arabidopsis thaliana GN=WAK1 PE=1 SV=2	XP_009387366.1|-164.1|PREDICTED: wall-associated receptor kinase 2-like isoform X1 [Musa acuminata subsp. malaccensis]
c190427_g1	-	-	4641.GSMUA_Achr3P01820_001|-50.7|ENOG410Y2MQ|S|Ribosomal L18p/L5e family	-	-	XP_020275235.1|-54.3|uncharacterized protein LOC109849772 [Asparagus officinalis]
c104283_g1	-	-	-	-	-	WP_066279592.1|-54.9|NADPH:quinone oxidoreductase [Blastomonas sp. CCH1-A6]
c222904_g1	-	-	39946.BGIOSGA008771-PA|-58.4|COG0515|T|Serine Threonine protein kinase	-	-	XP_020249826.1|-73.8|U-box domain-containing protein 33-like isoform X3 [Asparagus officinalis]
c217890_g1	-	-	-	-	-	ONK55458.1|-52.0|uncharacterized protein A4U43_UnF2940 [Asparagus officinalis]
c154790_g1	biological_process:proteolysis(GO:0006508);;molecular_function:peptidase activity(GO:0008233);;molecular_function:hydrolase activity(GO:0016787)	-	4641.GSMUA_Achr11P09920_001|-76.1|ENOG4111H3Z|S|Desumoylating isopeptidase	-	Q93VG8|PPDEX_ARATH|-53.8|DeSI-like protein At4g17486 OS=Arabidopsis thaliana GN=At4g17486 PE=2 SV=1	XP_019711303.1|-78.3|PREDICTED: deSI-like protein At4g17486 [Elaeis guineensis]
c326231_g1	-	-	-	-	-	WP_048466138.1|-58.2|gluconolaconase [Methylobacterium aquaticum]
c137523_g1	-	-	-	-	-	WP_082751056.1|-63.7|hypothetical protein [Blastomonas sp. CCH1-A6]
c217890_g2	cellular_component:plasma membrane(GO:0005886);;biological_process:transport(GO:0006810);;biological_process:auxin-activated signaling pathway(GO:0009734);;cellular_component:membrane(GO:0016020);;cellular_component:integral component of membrane(GO:0016021);;molecular_function:nucleotide binding(GO:0000166);;molecular_function:ATP binding(GO:0005524);;cellular_component:plasma membrane(GO:000588…	egu:105055560|-10000.0|K05658|ABCB1, CD243; ATP-binding cassette, subfamily B (MDR/TAP), member 1 [EC:3.6.3.44]|ko02010|ABC transporters;;	29760.VIT_08s0007g05060.t01|-10000.0|COG1132|V|(ABC) transporter	-	Q9ZR72|AB1B_ARATH|-10000.0|ABC transporter B family member 1 OS=Arabidopsis thaliana GN=ABCB1 PE=1 SV=1	XP_010935700.1|-10000.0|PREDICTED: ABC transporter B family member 1-like [Elaeis guineensis]
c130681_g1	-	-	29760.VIT_14s0081g00150.t01|-191.4|COG0666|S|Ankyrin Repeat	-	-	XP_008802839.1|-203.2|PREDICTED: ankyrin-1 isoform X1 [Phoenix dactylifera]
c222904_g5	molecular_function:kinase activity(GO:0016301);;biological_process:phosphorylation(GO:0016310);;biological_process:protein ubiquitination(GO:0016567);;molecular_function:transferase activity(GO:0016740);;molecular_function:nucleotide binding(GO:0000166);;molecular_function:protein serine/threonine kinase activity(GO:0004674);;molecular_function:ATP binding(GO:0005524)	-	3694.POPTR_0002s16150.1|-80.0|COG0515|T|Serine Threonine protein kinase	-	Q5WA76|PUB70_ORYSJ|-71.7|U-box domain-containing protein 70 OS=Oryza sativa subsp. japonica GN=PUB70 PE=1 SV=1	XP_009400254.1|-87.0|PREDICTED: U-box domain-containing protein 33-like [Musa acuminata subsp. malaccensis]
c188419_g1	-	-	-	-	-	WP_060980070.1|-50.6|MULTISPECIES: hypothetical protein [Proteobacteria]
c233453_g1	-	-	4081.Solyc03g097850.1.1|-258.4|ENOG410Z7Z7|S|Pentatricopeptide repeat-containing protein	-	Q9LFL5|PP390_ARATH|-235.4|Pentatricopeptide repeat-containing protein At5g16860 OS=Arabidopsis thaliana GN=PCMP-H92 PE=2 SV=1	XP_020246660.1|-10000.0|pentatricopeptide repeat-containing protein At5g16860 [Asparagus officinalis]
c142006_g1	cellular_component:membrane(GO:0016020);;cellular_component:integral component of membrane(GO:0016021);;molecular_function:transferase activity(GO:0016740);;biological_process:methylation(GO:0032259);;cellular_component:endoplasmic reticulum(GO:0005783);;cellular_component:endoplasmic reticulum membrane(GO:0005789);;molecular_function:methyltransferase activity(GO:0008168)	-	29760.VIT_02s0033g01120.t01|-91.1|ENOG4111CGI|S|Methyltransferase	-	Q94II3|PMTL_ARATH|-89.3|Probable methyltransferase PMT21 OS=Arabidopsis thaliana GN=ERD3 PE=2 SV=1	XP_020260665.1|-97.3|probable methyltransferase PMT21 [Asparagus officinalis]
c142006_g2	cellular_component:membrane(GO:0016020);;cellular_component:integral component of membrane(GO:0016021);;molecular_function:transferase activity(GO:0016740);;biological_process:methylation(GO:0032259);;cellular_component:endoplasmic reticulum(GO:0005783);;cellular_component:endoplasmic reticulum membrane(GO:0005789);;molecular_function:methyltransferase activity(GO:0008168)	-	4641.GSMUA_Achr11P23480_001|-63.3|ENOG4111CGI|S|Methyltransferase	-	Q94II3|PMTL_ARATH|-61.8|Probable methyltransferase PMT21 OS=Arabidopsis thaliana GN=ERD3 PE=2 SV=1	XP_018676522.1|-61.1|PREDICTED: probable methyltransferase PMT21 isoform X2 [Musa acuminata subsp. malaccensis]
c182296_g1	cellular_component:integral component of membrane(GO:0016021);;molecular_function:transferase activity(GO:0016740);;molecular_function:transferase activity, transferring acyl groups(GO:0016746);;molecular_function:protein-cysteine S-palmitoyltransferase activity(GO:0019706);;cellular_component:plasma membrane(GO:0005886);;cellular_component:plasma membrane(GO:0005886);;cellular_component:membrane…	-	29760.VIT_14s0068g01530.t01|-167.1|COG5273|S|Zinc finger, DHHC-type containing	-	Q9FLM3|ZDH23_ARATH|-143.4|Probable protein S-acyltransferase 6 OS=Arabidopsis thaliana GN=PAT06 PE=2 SV=1	XP_020261128.1|-191.9|probable protein S-acyltransferase 7 [Asparagus officinalis]
c192657_g1	-	-	4641.GSMUA_Achr11P16160_001|-73.2|ENOG41123NR|S|NA	-	-	ONK61646.1|-100.7|uncharacterized protein A4U43_C08F32120 [Asparagus officinalis]
c142006_g3	cellular_component:membrane(GO:0016020);;cellular_component:integral component of membrane(GO:0016021);;molecular_function:transferase activity(GO:0016740);;biological_process:methylation(GO:0032259);;cellular_component:Golgi membrane(GO:0000139);;cellular_component:Golgi apparatus(GO:0005794);;molecular_function:methyltransferase activity(GO:0008168)	-	4641.GSMUA_Achr4P27550_001|-66.4|ENOG4111CGI|S|Methyltransferase	-	Q9C6S7|PMTK_ARATH|-59.7|Probable methyltransferase PMT20 OS=Arabidopsis thaliana GN=At1g31850 PE=2 SV=1	XP_009397802.1|-64.2|PREDICTED: probable methyltransferase PMT21 [Musa acuminata subsp. malaccensis]
c202830_g1	-	-	-	-	-	XP_010932517.1|-49.2|PREDICTED: probable transcription factor RL9 isoform X1 [Elaeis guineensis]
c202974_g1	biological_process:cell cycle(GO:0007049);;biological_process:multicellular organism development(GO:0007275)	-	15368.BRADI3G53907.1|-10000.0|ENOG410XQUQ|S|Involved in proper cytoplasmic distribution of mitochondria (By similarity)	-	F4JKH6|TSS_ARATH|-10000.0|Protein TSS OS=Arabidopsis thaliana GN=TSS PE=1 SV=1	CDP16352.1|-10000.0|unnamed protein product [Coffea canephora]
c220342_g1	molecular_function:phosphatidylinositol-3,4,5-trisphosphate 5-phosphatase activity(GO:0034485);;biological_process:phosphatidylinositol dephosphorylation(GO:0046856);;molecular_function:phosphatidylinositol-4,5-bisphosphate 5-phosphatase activity(GO:0004439);;molecular_function:phosphatidylinositol-4,5-bisphosphate 5-phosphatase activity(GO:0004439);;molecular_function:hydrolase activity(GO:00167…	-	4533.OB01G37840.1|-173.4|COG5411|T|inositol	-	Q8H0Z6|IP5P3_ARATH|-150.0|Type IV inositol polyphosphate 5-phosphatase 3 OS=Arabidopsis thaliana GN=IP5P3 PE=1 SV=1	AIZ68186.1|-205.9|type I inositol 1,4,5-trisphosphate 5-phosphatase 1-like isoform X4 [Ornithogalum longebracteatum]
c123388_g1	-	-	384765.SIAM614_21255|-55.2|COG0435|O|glutathione Stransferase	-	-	WP_066926925.1|-84.8|glutathione-dependent reductase [Methylobacterium sp. CCH5-D2]
c213910_g1	biological_process:regulation of transcription, DNA-templated(GO:0006355);;molecular_function:hydrolase activity(GO:0016787);;cellular_component:nucleus(GO:0005634);;cellular_component:nucleus(GO:0005634);;biological_process:transcription, DNA-templated(GO:0006351)	-	4641.GSMUA_Achr3P05630_001|-146.1|COG0053|P|cation diffusion facilitator family transporter	-	Q9SZR3|SMXL4_ARATH|-109.7|Protein SMAX1-LIKE 4 OS=Arabidopsis thaliana GN=SMXL4 PE=1 SV=1	XP_020275485.1|-206.0|protein SMAX1-LIKE 4-like [Asparagus officinalis]
c289778_g1	-	-	-	-	-	WP_058472042.1|-86.9|type IV secretion protein IcmB [Legionella jordanis]
c163390_g1	-	-	-	-	-	OLI64198.1|-55.0|type VI secretion protein, partial [Xanthomonas oryzae pv. oryzae]
c214217_g1	biological_process:negative regulation of gene expression, epigenetic(GO:0045814);;molecular_function:protein binding(GO:0005515);;biological_process:negative regulation of transcription, DNA-templated(GO:0045892);;cellular_component:nucleus(GO:0005634);;molecular_function:metal ion binding(GO:0046872);;cellular_component:nucleus(GO:0005634);;cellular_component:nucleus(GO:0005634);;biological_pro…	-	4641.GSMUA_Achr7P00310_001|-117.8|ENOG410XQ5G|K|RING finger) protein	-	Q9FKW0|RNG1A_ARATH|-74.4|Putative E3 ubiquitin-protein ligase RING1a OS=Arabidopsis thaliana GN=RING1A PE=1 SV=2	ONK74907.1|-131.6|uncharacterized protein A4U43_C03F11340 [Asparagus officinalis]
c220342_g3	biological_process:metabolic process(GO:0008152);;molecular_function:transferase activity(GO:0016740);;molecular_function:xyloglucan:xyloglucosyl transferase activity(GO:0016762);;molecular_function:hydrolase activity(GO:0016787);;molecular_function:hydrolase activity, acting on glycosyl bonds(GO:0016798);;cellular_component:apoplast(GO:0048046);;cellular_component:apoplast(GO:0048046);;biologica…	-	29760.VIT_11s0052g01190.t01|-102.7|COG2273|G|hydrolase family 16	PF00722.19|Glyco_hydro_16|1.4e-61|Glycosyl hydrolases family 16	Q38857|XTH22_ARATH|-101.0|Xyloglucan endotransglucosylase/hydrolase protein 22 OS=Arabidopsis thaliana GN=XTH22 PE=1 SV=1	XP_020265880.1|-113.3|probable xyloglucan endotransglucosylase/hydrolase protein 23 [Asparagus officinalis]
c226016_g1	-	-	-	-	-	ONK77197.1|-71.1|uncharacterized protein A4U43_C02F4090 [Asparagus officinalis]
c225771_g2	biological_process:DNA recombination(GO:0006310);;biological_process:cellular response to DNA damage stimulus(GO:0006974);;biological_process:cell cycle(GO:0007049);;biological_process:meiotic cell cycle(GO:0051321);;biological_process:double-strand break repair via homologous recombination(GO:0000724);;molecular_function:DNA binding(GO:0003677);;biological_process:DNA repair(GO:0006281)	egu:105057159|-248.4|K08775|BRCA2, FANCD1; breast cancer 2 susceptibility protein|ko03440|Homologous recombination;;	4641.GSMUA_Achr5P28060_001|-215.8|ENOG410Y06W|S|Breast cancer 2, early onset	-	Q7Y1C4|BRC2B_ARATH|-151.0|Protein BREAST CANCER SUSCEPTIBILITY 2 homolog B OS=Arabidopsis thaliana GN=BRCA2B PE=1 SV=1	XP_020271573.1|-10000.0|protein BREAST CANCER SUSCEPTIBILITY 2 homolog B-like [Asparagus officinalis]
c190708_g1	molecular_function:metal ion binding(GO:0046872);;molecular_function:phosphoprotein phosphatase activity(GO:0004721);;molecular_function:phosphoprotein phosphatase activity(GO:0004721);;molecular_function:hydrolase activity(GO:0016787)	-	4555.Si013567m|-152.6|COG0631|T|Phosphatase	-	Q6ZKL8|P2C66_ORYSJ|-150.4|Probable protein phosphatase 2C 66 OS=Oryza sativa subsp. japonica GN=Os08g0500300 PE=2 SV=1	XP_015881094.1|-147.0|PREDICTED: probable protein phosphatase 2C 66 isoform X1 [Ziziphus jujuba]
c327824_g1	-	-	-	-	-	WP_024310416.1|-48.8|aminoacetone oxidase family FAD-binding enzyme [Sphingomonas melonis]
c226016_g2	cellular_component:cytoskeleton(GO:0005856);;molecular_function:actin binding(GO:0003779);;cellular_component:cytoplasm(GO:0005737);;cellular_component:cytoskeleton(GO:0005856)	-	4641.GSMUA_Achr5P14370_001|-94.5|ENOG4111H25|S|NA	-	Q84TX2|SCRL1_ORYSJ|-85.4|SCAR-like protein 1 OS=Oryza sativa subsp. japonica GN=Os03g0816900 PE=2 SV=2	ONK77197.1|-117.3|uncharacterized protein A4U43_C02F4090 [Asparagus officinalis]
c196630_g1	-	-	39947.LOC_Os03g61660.1|-57.5|ENOG410XS4D|S|Retrotransposon protein	-	-	KYP65915.1|-61.2|Retrovirus-related Pol polyprotein from transposon TNT 1-94 [Cajanus cajan]
c212742_g1	cellular_component:chloroplast thylakoid membrane(GO:0009535);;cellular_component:plastid(GO:0009536);;cellular_component:chloroplast stroma(GO:0009570);;cellular_component:thylakoid(GO:0009579);;cellular_component:membrane(GO:0016020);;molecular_function:metal ion binding(GO:0046872);;molecular_function:nucleotide binding(GO:0000166);;molecular_function:GTP binding(GO:0005525);;cellular_componen…	cit:102629533|-160.3|K03110|ftsY; fused signal recognition particle receptor|ko03060|Protein export;;	3847.GLYMA03G01770.3|-159.0|COG0552|U|Involved in targeting and insertion of nascent membrane proteins into the cytoplasmic membrane. Acts as a receptor for the complex formed by the signal recognition particle (SRP) and the ribosome-nascent chain (RNC)	PF00448.20|SRP54|9.9e-73|SRP54-type protein, GTPase domain	O80842|CFTSY_ARATH|-156.2|Cell division protein FtsY homolog, chloroplastic OS=Arabidopsis thaliana GN=CPFTSY PE=1 SV=2	XP_020114748.1|-160.0|cell division protein FtsY homolog, chloroplastic isoform X2 [Ananas comosus]
c230398_g1	biological_process:protein ubiquitination(GO:0016567)	-	4533.OB06G32240.1|-163.4|ENOG410YBFM|S|BTB POZ domain-containing protein	-	P93820|Y1439_ARATH|-105.2|BTB/POZ domain-containing protein At1g04390 OS=Arabidopsis thaliana GN=At1g04390 PE=2 SV=3	XP_020270319.1|-264.3|BTB/POZ domain-containing protein At1g04390 isoform X1 [Asparagus officinalis]
c230110_g3	-	-	4641.GSMUA_Achr1P24520_001|-50.1|ENOG410YV57|S|GTPase activating protein (SH3 domain) binding protein	-	-	-
c116281_g3	-	mor:MOC_1622|-54.6|K02041|phnC; phosphonate transport system ATP-binding protein [EC:3.6.3.28]|ko02010|ABC transporters;;	-	-	-	WP_066925616.1|-64.4|ABC transporter [Methylobacterium sp. CCH5-D2]
c21573_g1	biological_process:ion transport(GO:0006811);;biological_process:proton transport(GO:0015992);;cellular_component:membrane(GO:0016020);;cellular_component:vacuole(GO:0005773);;cellular_component:vacuolar membrane(GO:0005774);;biological_process:transport(GO:0006810)	egu:105058083|-111.7|K02148|ATPeV1C, ATP6C; V-type H+-transporting ATPase subunit C|ko04145|Phagosome;;ko00190|Oxidative phosphorylation;;	4555.Si010360m|-108.0|COG5127|C|ATP hydrolysis coupled proton transport	PF03223.13|V-ATPase_C|4.1e-83|V-ATPase subunit C	Q9SDS7|VATC_ARATH|-104.3|V-type proton ATPase subunit C OS=Arabidopsis thaliana GN=VHA-C PE=1 SV=1	XP_010939209.1|-111.0|PREDICTED: V-type proton ATPase subunit C isoform X1 [Elaeis guineensis]
c223966_g3	cellular_component:nucleus(GO:0005634);;cellular_component:nucleus(GO:0005634);;molecular_function:metal ion binding(GO:0046872)	-	29760.VIT_04s0044g01920.t01|-70.5|ENOG410ZJSX|S|protein FAR1-RELATED SEQUENCE 5-like	-	Q9SZL8|FRS5_ARATH|-71.7|Protein FAR1-RELATED SEQUENCE 5 OS=Arabidopsis thaliana GN=FRS5 PE=2 SV=1	XP_020412171.1|-99.1|protein FAR1-RELATED SEQUENCE 5 isoform X1 [Prunus persica]
c229414_g1	-	-	-	-	-	XP_019228184.1|-66.2|PREDICTED: valine--tRNA ligase, mitochondrial 1-like [Nicotiana attenuata]
c21573_g2	biological_process:ion transport(GO:0006811);;biological_process:proton transport(GO:0015992);;cellular_component:membrane(GO:0016020);;cellular_component:vacuole(GO:0005773);;cellular_component:vacuolar membrane(GO:0005774);;biological_process:transport(GO:0006810)	egu:105058083|-185.0|K02148|ATPeV1C, ATP6C; V-type H+-transporting ATPase subunit C|ko04145|Phagosome;;ko00190|Oxidative phosphorylation;;	29760.VIT_17s0000g00460.t01|-176.8|COG5127|C|ATP hydrolysis coupled proton transport	PF03223.13|V-ATPase_C|1.2e-125|V-ATPase subunit C	Q9SDS7|VATC_ARATH|-170.8|V-type proton ATPase subunit C OS=Arabidopsis thaliana GN=VHA-C PE=1 SV=1	XP_020259223.1|-189.3|V-type proton ATPase subunit C [Asparagus officinalis]
c167177_g1	biological_process:chloroplast relocation(GO:0009902);;biological_process:chloroplast avoidance movement(GO:0009903);;biological_process:actin filament-based movement(GO:0030048);;biological_process:nuclear migration along microfilament(GO:0031022);;cellular_component:cytoplasm(GO:0005737);;cellular_component:cytoplasm(GO:0005737);;biological_process:response to blue light(GO:0009637)	-	4081.Solyc05g032750.2.1|-195.2|ENOG410Y9MA|S|NA	-	F4K5K6|PMIR1_ARATH|-154.2|Protein PLASTID MOVEMENT IMPAIRED 1-RELATED 1 OS=Arabidopsis thaliana GN=PMIR1 PE=2 SV=1	XP_010090107.1|-202.7|hypothetical protein L484_027339 [Morus notabilis]
c194825_g1	cellular_component:endosome membrane(GO:0010008);;cellular_component:membrane(GO:0016020);;cellular_component:integral component of membrane(GO:0016021);;molecular_function:hydrolase activity(GO:0016787);;cellular_component:endosome(GO:0005768);;biological_process:proteolysis(GO:0006508);;molecular_function:peptidase activity(GO:0008233)	-	39947.LOC_Os11g24540.1|-220.2|ENOG410ZP52|U|signal peptide	PF04258.11|Peptidase_A22B|6.4e-80|Signal peptide peptidase	Q53P98|SIPL2_ORYSJ|-221.4|Signal peptide peptidase-like 2 OS=Oryza sativa subsp. japonica GN=SPPL2 PE=2 SV=1	XP_020245743.1|-247.5|signal peptide peptidase-like 2 [Asparagus officinalis]
c167177_g2	-	-	-	-	-	XP_020242601.1|-66.3|LOW QUALITY PROTEIN: protein PLASTID MOVEMENT IMPAIRED 1-RELATED 1-like [Asparagus officinalis]
c222654_g1	-	-	4577.GRMZM2G110567_P01|-119.7|COG2304|S|von Willebrand factor, type A	-	-	XP_002524155.1|-126.6|PREDICTED: uncharacterized protein LOC8274802 [Ricinus communis]
c303040_g1	molecular_function:ATP binding(GO:0005524);;cellular_component:nucleus(GO:0005634);;cellular_component:nucleus(GO:0005634);;biological_process:DNA repair(GO:0006281);;biological_process:transcription, DNA-templated(GO:0006351);;biological_process:regulation of transcription, DNA-templated(GO:0006355);;biological_process:cellular response to DNA damage stimulus(GO:0006974);;biological_process:cova…	-	29760.VIT_08s0007g09020.t01|-106.8|ENOG410XP0A|L|chromatin modification	-	Q8RXS6|INO80_ARATH|-105.0|DNA helicase INO80 OS=Arabidopsis thaliana GN=INO80 PE=2 SV=2	XP_010279572.1|-105.7|PREDICTED: DNA helicase INO80-like isoform X1 [Nelumbo nucifera]
c223966_g6	-	-	-	-	-	XP_004295765.1|-67.1|PREDICTED: protein FAR1-RELATED SEQUENCE 5-like [Fragaria vesca subsp. vesca]
c178257_g2	-	-	-	-	-	WP_066117769.1|-70.8|TonB-dependent receptor [Blastomonas sp. CCH11-A4]
c205449_g1	-	-	3694.POPTR_0003s20710.1|-153.0|ENOG410Z7Z7|S|Pentatricopeptide repeat-containing protein	-	Q9FMA1|PP433_ARATH|-136.0|Pentatricopeptide repeat-containing protein At5g56310 OS=Arabidopsis thaliana GN=PCMP-E13 PE=2 SV=1	XP_010938127.1|-193.0|PREDICTED: pentatricopeptide repeat-containing protein At5g56310 [Elaeis guineensis]
c206086_g1	molecular_function:transferase activity(GO:0016740);;molecular_function:nucleotide binding(GO:0000166);;molecular_function:ATP binding(GO:0005524);;biological_process:protein ubiquitination(GO:0016567)	pda:103710362|-91.7|K10576|UBE2H, UBC8; ubiquitin-conjugating enzyme E2 H [EC:2.3.2.23]|ko04120|Ubiquitin mediated proteolysis;;	4641.GSMUA_Achr5P13210_001|-91.7|ENOG410XRC5|O|ubiquitin-conjugating enzyme	-	P42748|UBC4_ARATH|-84.1|Ubiquitin-conjugating enzyme E2 4 OS=Arabidopsis thaliana GN=UBC4 PE=2 SV=2	XP_020260128.1|-92.1|ubiquitin-conjugating enzyme E2-23 kDa-like [Asparagus officinalis]
c154004_g1	-	-	-	-	-	XP_020267833.1|-77.5|putative transcription factor bHLH041 [Asparagus officinalis]
c137273_g1	-	-	29760.VIT_18s0001g06390.t01|-207.2|ENOG410XTG2|S|DUF246 domain-containing protein	PF10250.7|O-FucT|3.5e-79|GDP-fucose protein O-fucosyltransferase	-	XP_020258177.1|-227.5|uncharacterized protein At1g04910, partial [Asparagus officinalis]
c206086_g2	molecular_function:transferase activity(GO:0016740);;molecular_function:nucleotide binding(GO:0000166);;molecular_function:ATP binding(GO:0005524);;biological_process:protein ubiquitination(GO:0016567)	egu:105053594|-86.7|K10576|UBE2H, UBC8; ubiquitin-conjugating enzyme E2 H [EC:2.3.2.23]|ko04120|Ubiquitin mediated proteolysis;;	4533.OB10G19060.1|-85.1|ENOG410XRC5|O|ubiquitin-conjugating enzyme	-	P42748|UBC4_ARATH|-82.8|Ubiquitin-conjugating enzyme E2 4 OS=Arabidopsis thaliana GN=UBC4 PE=2 SV=2	XP_010933128.1|-86.0|PREDICTED: ubiquitin-conjugating enzyme E2 4 isoform X1 [Elaeis guineensis]
c217166_g1	biological_process:transcription, DNA-templated(GO:0006351);;biological_process:regulation of transcription, DNA-templated(GO:0006355);;molecular_function:DNA binding(GO:0003677);;cellular_component:nucleus(GO:0005634);;cellular_component:nucleus(GO:0005634)	-	4641.GSMUA_Achr7P15740_001|-87.8|ENOG410YCXV|S|Myblike DNAbinding domain containing protein	-	Q6YXZ4|PHR3_ORYSJ|-82.7|Protein PHOSPHATE STARVATION RESPONSE 3 OS=Oryza sativa subsp. japonica GN=PHR3 PE=2 SV=1	XP_020245886.1|-101.2|protein PHOSPHATE STARVATION RESPONSE 3 isoform X1 [Asparagus officinalis]
c95204_g1	-	-	-	-	-	WP_066918527.1|-62.3|luciferase family oxidoreductase [Methylobacterium sp. CCH5-D2]
c147716_g1	-	-	-	-	-	XP_015384470.1|-60.3|PREDICTED: uncharacterized protein LOC107176464 [Citrus sinensis]
c210180_g1	-	-	4641.GSMUA_Achr5P27870_001|-51.4|COG0526|O|Thioredoxin	-	-	XP_020103652.1|-51.6|thioredoxin H4-1-like [Ananas comosus]
c193657_g1	-	-	4641.GSMUA_Achr8P29060_001|-116.2|COG0451|M|Nad-dependent epimerase dehydratase	-	-	XP_020680187.1|-121.2|cinnamoyl-CoA reductase 2 [Dendrobium catenatum]
c148353_g1	cellular_component:nucleus(GO:0005634);;molecular_function:hydrolase activity(GO:0016787);;molecular_function:nuclease activity(GO:0004518);;molecular_function:exonuclease activity(GO:0004527);;cellular_component:nucleus(GO:0005634)	pda:103711035|-217.0|K14570|REX1, REXO1, RNH70; RNA exonuclease 1 [EC:3.1.-.-]|ko03008|Ribosome biogenesis in eukaryotes;;	4641.GSMUA_Achr3P16500_001|-215.4|COG0847|L|DNA polymerase iii	-	Q8L7M4|SDN5_ARATH|-185.5|Small RNA degrading nuclease 5 OS=Arabidopsis thaliana GN=SDN5 PE=2 SV=2	XP_020273959.1|-227.5|small RNA degrading nuclease 5 isoform X1 [Asparagus officinalis]
c285123_g1	biological_process:fatty acid biosynthetic process(GO:0006633);;cellular_component:chloroplast(GO:0009507);;cellular_component:chloroplast(GO:0009507);;cellular_component:plastid(GO:0009536);;cellular_component:plastid(GO:0009536);;molecular_function:oxidoreductase activity(GO:0016491);;molecular_function:acyl-[acyl-carrier-protein] desaturase activity(GO:0045300);;molecular_function:metal ion bi…	pda:103710625|-179.6|K03921|FAB2, SSI2, desA1; acyl-[acyl-carrier-protein] desaturase [EC:1.14.19.2 1.14.19.11 1.14.19.26]|ko00061|Fatty acid biosynthesis;;ko01040|Biosynthesis of unsaturated fatty acids;;ko01212|Fatty acid metabolism;;	4533.OB01G50790.1|-174.8|ENOG410XPNS|I|Converts stearoyl-ACP to oleoyl-ACP by introduction of a cis double bond between carbons Delta(9) and Delta(10) of the acyl chain	PF03405.12|FA_desaturase_2|1e-155|Fatty acid desaturase	O24428|STAD_ELAGV|-178.2|Stearoyl-[acyl-carrier-protein] 9-desaturase, chloroplastic OS=Elaeis guineensis var. tenera PE=2 SV=2	XP_020245768.1|-185.4|stearoyl-[acyl-carrier-protein] 9-desaturase 5, chloroplastic-like [Asparagus officinalis]
c228102_g4	-	-	3847.GLYMA05G23600.1|-93.2|ENOG410Z2X5|S|CACTA, En Spm sub-class	PF02992.12|Transposase_21|3.3e-85|Transposase family tnp2	-	XP_012836542.1|-181.7|PREDICTED: uncharacterized protein LOC105957167 [Erythranthe guttata]
c135386_g2	-	-	-	-	-	WP_081096868.1|-128.4|MULTISPECIES: acyl-CoA synthetase [Proteobacteria]
c228102_g5	-	-	3847.GLYMA15G21480.1|-108.5|ENOG410Z2X5|S|CACTA, En Spm sub-class	-	-	XP_020253948.1|-204.2|uncharacterized protein LOC109831015 [Asparagus officinalis]
c180546_g2	cellular_component:nucleus(GO:0005634);;cellular_component:nucleus(GO:0005634);;molecular_function:metal ion binding(GO:0046872)	-	4538.ORGLA07G0170400.1|-166.1|ENOG410ZJVC|S|transposon protein	-	Q9SZL8|FRS5_ARATH|-90.9|Protein FAR1-RELATED SEQUENCE 5 OS=Arabidopsis thaliana GN=FRS5 PE=2 SV=1	XP_010930749.1|-246.7|PREDICTED: protein FAR1-RELATED SEQUENCE 5-like [Elaeis guineensis]
c208929_g1	cellular_component:plasma membrane(GO:0005886);;cellular_component:plasma membrane(GO:0005886);;cellular_component:membrane(GO:0016020);;cellular_component:integral component of membrane(GO:0016021);;molecular_function:kinase activity(GO:0016301);;biological_process:phosphorylation(GO:0016310);;molecular_function:transferase activity(GO:0016740);;molecular_function:nucleotide binding(GO:0000166);…	-	4558.Sb02g002840.1|-213.5|COG0515|T|Serine Threonine protein kinase	-	Q9SA72|Y1357_ARATH|-179.0|Probable receptor-like protein kinase At1g30570 OS=Arabidopsis thaliana GN=At1g30570 PE=3 SV=1	XP_002461449.2|-211.4|probable receptor-like protein kinase At1g30570 [Sorghum bicolor]
c221260_g4	cellular_component:cytoskeleton(GO:0005856);;molecular_function:actin binding(GO:0003779);;cellular_component:cytoplasm(GO:0005737);;cellular_component:cytoskeleton(GO:0005856)	-	4641.GSMUA_Achr5P25390_001|-285.8|COG5069|Z|Microtubule associated monoxygenase, calponin and LIM domain containing	-	O50064|FIMB2_ARATH|-248.4|Fimbrin-2 OS=Arabidopsis thaliana GN=FIM2 PE=2 SV=1	XP_020262874.1|-292.7|fimbrin-2-like [Asparagus officinalis]
c227078_g1	cellular_component:membrane(GO:0016020);;cellular_component:membrane(GO:0016020);;cellular_component:integral component of membrane(GO:0016021)	-	4641.GSMUA_Achr1P18870_001|-10000.0|ENOG41101S9|T|SPX domain-containing membrane protein	-	Q0JAW2|SPXM2_ORYSJ|-299.2|SPX domain-containing membrane protein Os04g0573000 OS=Oryza sativa subsp. japonica GN=Os04g0573000 PE=2 SV=2	XP_019705619.1|-10000.0|PREDICTED: SPX domain-containing membrane protein OsI_17046 [Elaeis guineensis]
c209484_g1	biological_process:DNA-templated transcription, termination(GO:0006353);;biological_process:regulation of transcription, DNA-templated(GO:0006355);;cellular_component:chloroplast(GO:0009507);;cellular_component:chloroplast(GO:0009507);;cellular_component:plastid(GO:0009536);;cellular_component:mitochondrion(GO:0005739);;cellular_component:mitochondrion(GO:0005739);;biological_process:transcriptio…	-	3694.POPTR_0014s13360.1|-178.1|ENOG410XT49|S|mitochondrial transcription termination	PF02536.12|mTERF|2.4e-103|mTERF	Q9ZT96|MTEF4_ARATH|-175.4|Transcription termination factor MTERF4, chloroplastic OS=Arabidopsis thaliana GN=MTERF4 PE=1 SV=1	XP_020271396.1|-224.3|transcription termination factor MTERF4, chloroplastic [Asparagus officinalis]
c228102_g6	-	-	4577.GRMZM2G397794_P01|-52.5|-|-|-	PF02992.12|Transposase_21|7.6e-76|Transposase family tnp2	-	XP_012836542.1|-77.4|PREDICTED: uncharacterized protein LOC105957167 [Erythranthe guttata]
c23741_g1	molecular_function:protein binding(GO:0005515);;molecular_function:protein binding(GO:0005515);;molecular_function:ATP binding(GO:0005524);;cellular_component:nucleus(GO:0005634);;cellular_component:nucleus(GO:0005634);;cellular_component:nucleus(GO:0005634);;cellular_component:cytoplasm(GO:0005737);;cellular_component:cytoplasm(GO:0005737);;cellular_component:cytoplasm(GO:0005737);;molecular_fun…	nnu:104609753|-76.3|K14502|BIN2; protein brassinosteroid insensitive 2 [EC:2.7.11.1]|ko04075|Plant hormone signal transduction;;	4513.MLOC_68311.2|-76.9|COG0515|T|Serine Threonine protein kinase	-	Q60EZ2|GSK2_ORYSJ|-77.0|Shaggy-related protein kinase GSK2 OS=Oryza sativa subsp. japonica GN=GSK2 PE=1 SV=1	XP_010274430.1|-75.4|PREDICTED: shaggy-related protein kinase eta-like [Nelumbo nucifera]
c150786_g1	-	-	-	-	-	WP_067512561.1|-106.6|MULTISPECIES: hypothetical protein [Proteobacteria]
c196911_g1	biological_process:carbohydrate metabolic process(GO:0005975);;biological_process:galactose metabolic process(GO:0006012);;biological_process:galactose metabolic process(GO:0006012);;molecular_function:kinase activity(GO:0016301);;biological_process:phosphorylation(GO:0016310);;molecular_function:transferase activity(GO:0016740);;molecular_function:metal ion binding(GO:0046872);;molecular_functio…	-	4641.GSMUA_Achr1P03440_001|-234.8|COG0153|G|Catalyzes the transfer of the gamma-phosphate of ATP to D-galactose to form alpha-D-galactose-1-phosphate (Gal-1-P) (By similarity)	-	Q9SEE5|GALK1_ARATH|-217.2|Galactokinase OS=Arabidopsis thaliana GN=GAL1 PE=1 SV=2	XP_020241432.1|-243.4|galactokinase [Asparagus officinalis]
c228102_g8	-	-	3847.GLYMA05G23600.1|-98.1|ENOG410Z2X5|S|CACTA, En Spm sub-class	PF02992.12|Transposase_21|1.5e-86|Transposase family tnp2	-	XP_012836542.1|-144.4|PREDICTED: uncharacterized protein LOC105957167 [Erythranthe guttata]
c197218_g1	-	-	4641.GSMUA_Achr5P25560_001|-122.2|ENOG410YD5P|S|Protein of unknown function (DUF3537)	PF12056.6|DUF3537|6.4e-124|Protein of unknown function (DUF3537)	-	XP_017697887.1|-131.3|PREDICTED: uncharacterized protein LOC103705753 isoform X1 [Phoenix dactylifera]
c162029_g1	-	-	-	-	-	WP_060979185.1|-68.4|MULTISPECIES: magnesium transporter [Proteobacteria]
c207535_g1	cellular_component:membrane(GO:0016020);;cellular_component:integral component of membrane(GO:0016021);;biological_process:defense response to bacterium(GO:0042742);;cellular_component:plasma membrane(GO:0005886);;cellular_component:plasma membrane(GO:0005886);;biological_process:defense response(GO:0006952)	-	29760.VIT_06s0009g01620.t01|-65.9|ENOG410YIDD|S|Harpin-induced protein 1 containing protein, expressed	-	Q9ZVD2|NHL13_ARATH|-57.9|NDR1/HIN1-like protein 13 OS=Arabidopsis thaliana GN=NHL13 PE=2 SV=1	XP_010922964.2|-75.4|PREDICTED: uncharacterized protein LOC105046139 [Elaeis guineensis]
c200631_g1	-	-	-	-	-	XP_020250746.1|-115.8|protein FAR1-RELATED SEQUENCE 5-like [Asparagus officinalis]
c138722_g1	-	-	-	-	-	WP_066920718.1|-52.2|hypothetical protein [Methylobacterium sp. CCH5-D2]
c208172_g2	-	-	29760.VIT_06s0009g03560.t01|-137.0|ENOG410Z7Z7|S|Pentatricopeptide repeat-containing protein	-	O04659|PP398_ARATH|-116.9|Pentatricopeptide repeat-containing protein At5g27110 OS=Arabidopsis thaliana GN=PCMP-E14 PE=2 SV=2	XP_020260635.1|-160.8|pentatricopeptide repeat-containing protein At5g27110 [Asparagus officinalis]
c190458_g2	cellular_component:ribosome(GO:0005840);;cellular_component:intracellular ribonucleoprotein complex(GO:0030529)	mus:103985819|-82.9|K02880|RP-L17e, RPL17; large subunit ribosomal protein L17e|ko03010|Ribosome;;	4513.MLOC_73576.1|-84.1|COG0091|J|The globular domain of the protein is located near the polypeptide exit tunnel on the outside of the subunit, while an extended beta-hairpin is found that lines the wall of the exit tunnel in the center of the 70S ribosome (By similarity)	-	P35266|RL171_HORVU|-84.7|60S ribosomal protein L17-1 OS=Hordeum vulgare PE=2 SV=1	AAG49551.1|-83.4|ribosomal protein L17-1 [Poa secunda]
c195743_g1	-	-	-	-	-	XP_020258671.1|-142.3|myosin-binding protein 1-like [Asparagus officinalis]
c208172_g3	-	-	29760.VIT_06s0009g03560.t01|-71.1|ENOG410Z7Z7|S|Pentatricopeptide repeat-containing protein	-	O04659|PP398_ARATH|-58.8|Pentatricopeptide repeat-containing protein At5g27110 OS=Arabidopsis thaliana GN=PCMP-E14 PE=2 SV=2	XP_020260635.1|-83.8|pentatricopeptide repeat-containing protein At5g27110 [Asparagus officinalis]
c211999_g1	cellular_component:cytoplasm(GO:0005737);;cellular_component:cytoplasm(GO:0005737);;biological_process:transcription, DNA-templated(GO:0006351);;biological_process:regulation of transcription, DNA-templated(GO:0006355);;biological_process:cell cycle(GO:0007049);;molecular_function:DNA binding(GO:0003677);;cellular_component:nucleus(GO:0005634);;cellular_component:nucleus(GO:0005634)	-	3847.GLYMA11G01270.1|-116.7|ENOG410Y9QP|K|Transcription factor	-	Q9FNY2|DPB_ARATH|-105.0|Transcription factor-like protein DPB OS=Arabidopsis thaliana GN=DPB PE=1 SV=1	XP_010918667.1|-125.8|PREDICTED: LOW QUALITY PROTEIN: transcription factor-like protein DPB [Elaeis guineensis]
c167458_g1	molecular_function:ATP binding(GO:0005524);;molecular_function:RNA polymerase II carboxy-terminal domain kinase activity(GO:0008353);;molecular_function:kinase activity(GO:0016301);;biological_process:phosphorylation(GO:0016310);;molecular_function:transferase activity(GO:0016740);;molecular_function:nucleotide binding(GO:0000166);;molecular_function:protein serine/threonine kinase activity(GO:00…	-	39947.LOC_Os01g67160.1|-84.4|ENOG410XPP3|T|Cyclin-Dependent Kinase	-	Q8L4P8|CKB11_ORYSJ|-85.5|Cyclin-dependent kinase B1-1 OS=Oryza sativa subsp. japonica GN=CDKB1-1 PE=2 SV=1	XP_020276936.1|-88.0|cyclin-dependent kinase B1-1 [Asparagus officinalis]
c131880_g1	biological_process:transcription, DNA-templated(GO:0006351);;biological_process:regulation of transcription, DNA-templated(GO:0006355);;molecular_function:DNA binding(GO:0003677);;cellular_component:nucleus(GO:0005634);;cellular_component:nucleus(GO:0005634)	-	4641.GSMUA_Achr4P17570_001|-79.2|ENOG410YAFX|K|Transcription factor	-	Q84T08|BH089_ORYSJ|-70.7|Transcription factor BHLH089 OS=Oryza sativa subsp. japonica GN=BHLH089 PE=1 SV=1	XP_008808720.1|-90.8|PREDICTED: transcription factor bHLH79-like isoform X1 [Phoenix dactylifera]
c211855_g1	cellular_component:plastid(GO:0009536);;cellular_component:thylakoid(GO:0009579);;biological_process:photosynthesis(GO:0015979);;cellular_component:membrane(GO:0016020);;cellular_component:chloroplast(GO:0009507);;cellular_component:photosystem II(GO:0009523);;cellular_component:chloroplast thylakoid membrane(GO:0009535)	crb:CARUB_v10005561mg|-71.2|K08901|psbQ; photosystem II oxygen-evolving enhancer protein 3|ko00195|Photosynthesis;;	3711.Bra013517.1-P|-71.3|ENOG4111SJA|S|oxygen-evolving enhancer protein	PF05757.9|PsbQ|1.1e-78|Oxygen evolving enhancer protein 3 (PsbQ)	Q9XFT3|PSBQ1_ARATH|-69.5|Oxygen-evolving enhancer protein 3-1, chloroplastic OS=Arabidopsis thaliana GN=PSBQ1 PE=1 SV=3	XP_006284392.1|-70.4|hypothetical protein CARUB_v10005561mg, partial [Capsella rubella]
c229839_g1	cellular_component:nucleus(GO:0005634);;cellular_component:nucleus(GO:0005634)	-	29760.VIT_05s0020g02350.t01|-243.1|COG5079|DU|minichromosome maintenance complex component 3 associated protein	PF03399.14|SAC3_GANP|3.3e-83|SAC3/GANP family	F4JAU2|SAC3B_ARATH|-182.8|SAC3 family protein B OS=Arabidopsis thaliana GN=SAC3B PE=1 SV=1	XP_020274574.1|-10000.0|SAC3 family protein B isoform X1 [Asparagus officinalis]
c211711_g2	cellular_component:mitochondrion(GO:0005739);;cellular_component:mitochondrion(GO:0005739);;biological_process:mRNA processing(GO:0006397);;biological_process:RNA splicing(GO:0008380);;cellular_component:chloroplast(GO:0009507);;cellular_component:chloroplast(GO:0009507);;cellular_component:chloroplast(GO:0009507);;cellular_component:plastid(GO:0009536);;cellular_component:intracellular ribonucle…	-	4555.Si021265m|-266.6|ENOG410YDW8|S|CRS1_YhbY	-	Q2R1U8|CFM3_ORYSJ|-126.1|CRM-domain containing factor CFM3, chloroplastic/mitochondrial OS=Oryza sativa subsp. japonica GN=CFM3 PE=3 SV=1	XP_020266477.1|-303.8|CRM-domain containing factor CFM3, chloroplastic/mitochondrial [Asparagus officinalis]
c108880_g1	cellular_component:cytoplasm(GO:0005737);;molecular_function:oxidoreductase activity(GO:0016491);;molecular_function:cysteine dioxygenase activity(GO:0017172);;molecular_function:metal ion binding(GO:0046872);;biological_process:oxidation-reduction process(GO:0055114);;cellular_component:nucleus(GO:0005634);;cellular_component:nucleus(GO:0005634);;cellular_component:cytoplasm(GO:0005737)	pda:103705025|-85.2|K10712|ADO; cysteamine dioxygenase [EC:1.13.11.19]|ko00430|Taurine and hypotaurine metabolism;;	4641.GSMUA_Achr5P06310_001|-84.3|ENOG4111Y3H|S|2-aminoethanethiol	PF07847.10|PCO_ADO|9.2e-70|PCO_ADO	Q9LXG9|PCO1_ARATH|-68.6|Plant cysteine oxidase 1 OS=Arabidopsis thaliana GN=PCO1 PE=1 SV=1	XP_020240849.1|-103.1|plant cysteine oxidase 2-like [Asparagus officinalis]
c165983_g1	-	-	-	-	-	WP_069049297.1|-56.4|antirepressor [Blastomonas sp. RAC04]
c149271_g1	-	-	-	-	-	WP_066114669.1|-62.9|MULTISPECIES: sigma-54-dependent Fis family transcriptional regulator [Sphingomonadales]
c102365_g1	-	-	-	-	-	KTE60971.1|-125.7|LysR family transcriptional regulator [Sphingopyxis sp. H085]
c229164_g2	biological_process:DNA repair(GO:0006281);;biological_process:DNA recombination(GO:0006310);;biological_process:cellular response to DNA damage stimulus(GO:0006974);;molecular_function:DNA binding(GO:0003677);;cellular_component:nucleus(GO:0005634);;cellular_component:nucleus(GO:0005634)	eus:EUTSA_v10005594mg|-62.9|K10879|XRCC2; DNA-repair protein XRCC2|ko03440|Homologous recombination;;	59689.Al_scaffold_0008_2995|-63.8|ENOG4112B2N|L|X-ray repair complementing defective repair in Chinese hamster cells 2	-	Q682D3|XRCC2_ARATH|-64.3|DNA repair protein XRCC2 homolog OS=Arabidopsis thaliana GN=XRCC2 PE=2 SV=2	CDM85171.1|-66.5|unnamed protein product [Triticum aestivum]
c101502_g2	cellular_component:cell wall(GO:0005618);;biological_process:metabolic process(GO:0008152);;molecular_function:hydrolase activity(GO:0016787);;molecular_function:hydrolase activity, acting on glycosyl bonds(GO:0016798);;biological_process:cell wall organization(GO:0071555);;molecular_function:polygalacturonase activity(GO:0004650);;cellular_component:extracellular region(GO:0005576);;cellular_com…	-	3847.GLYMA09G05610.1|-68.4|ENOG4112DA5|S|polygalacturonase QRT3-like	-	O49432|QRT3_ARATH|-72.0|Polygalacturonase QRT3 OS=Arabidopsis thaliana GN=QRT3 PE=2 SV=1	KYP62326.1|-83.5|Polygalacturonase QRT3 [Cajanus cajan]
c204418_g1	-	-	4555.Si014292m|-88.0|COG0300|S|Dehydrogenase	-	-	XP_020255098.1|-111.0|uncharacterized protein LOC109832060 [Asparagus officinalis]
c232765_g1	-	pda:103715430|-69.9|K02867|RP-L11, MRPL11, rplK; large subunit ribosomal protein L11|ko03010|Ribosome;;	4641.GSMUA_Achr7P18810_001|-68.7|COG0080|J|This protein binds directly to 23S ribosomal RNA (By similarity)	-	-	ONK73198.1|-71.4|uncharacterized protein A4U43_C04F28290 [Asparagus officinalis]
c215890_g1	biological_process:phospholipid metabolic process(GO:0006644);;biological_process:phospholipid metabolic process(GO:0006644);;biological_process:phospholipid biosynthetic process(GO:0008654);;cellular_component:membrane(GO:0016020);;cellular_component:integral component of membrane(GO:0016021);;molecular_function:transferase activity(GO:0016740);;molecular_function:transferase activity, transferr…	mus:103995894|-113.2|K13510|LPCAT1_2; lysophosphatidylcholine acyltransferase / lyso-PAF acetyltransferase [EC:2.3.1.23 2.3.1.67]|ko00564|Glycerophospholipid metabolism;;ko00565|Ether lipid metabolism;;	29760.VIT_18s0001g12080.t01|-104.9|ENOG410XSIQ|I|Lysophosphatidylcholine acyltransferase	-	Q8L7R3|LPCT1_ARATH|-93.5|Lysophospholipid acyltransferase LPEAT1 OS=Arabidopsis thaliana GN=LPEAT1 PE=1 SV=1	XP_009414903.1|-112.4|PREDICTED: lysophospholipid acyltransferase LPEAT1 isoform X2 [Musa acuminata subsp. malaccensis]
c163952_g1	-	-	-	-	-	WP_060978555.1|-52.8|MULTISPECIES: cysteine synthase A [Proteobacteria]
c205199_g2	-	-	4641.GSMUA_Achr3P14480_001|-94.8|ENOG410Y3Q0|S|CRAL TRIO domain protein	-	-	XP_020269110.1|-101.1|CRAL-TRIO domain-containing protein C3H8.02 isoform X1 [Asparagus officinalis]
c181320_g1	cellular_component:integral component of membrane(GO:0016021);;biological_process:carotenoid biosynthetic process(GO:0016117);;molecular_function:oxidoreductase activity(GO:0016491);;molecular_function:hydrolase activity(GO:0016787);;cellular_component:chloroplast membrane(GO:0031969);;molecular_function:metal ion binding(GO:0046872);;biological_process:oxidation-reduction process(GO:0055114);;ce…	mus:103970270|-109.8|K15746|crtZ; beta-carotene 3-hydroxylase [EC:1.14.13.129]|ko00906|Carotenoid biosynthesis;;	4641.GSMUA_Achr11P02930_001|-111.0|ENOG4111G77|S|Beta-carotene hydroxylase	-	Q9SZZ8|BCH1_ARATH|-110.2|Beta-carotene 3-hydroxylase 1, chloroplastic OS=Arabidopsis thaliana GN=BETA-OHASE 1 PE=1 SV=1	XP_009382258.1|-109.0|PREDICTED: beta-carotene 3-hydroxylase 2, chloroplastic [Musa acuminata subsp. malaccensis]
c180827_g1	cellular_component:spliceosomal complex(GO:0005681);;biological_process:mRNA processing(GO:0006397);;biological_process:RNA splicing(GO:0008380);;cellular_component:intracellular ribonucleoprotein complex(GO:0030529);;molecular_function:metal ion binding(GO:0046872);;molecular_function:RNA binding(GO:0003723);;cellular_component:nucleus(GO:0005634);;cellular_component:nucleus(GO:0005634)	-	4538.ORGLA09G0149300.1|-79.2|ENOG4111IY7|S|Zinc finger CCHC-type and RNA binding motif 1	-	Q9CAE4|U1131_ARATH|-71.4|U11/U12 small nuclear ribonucleoprotein 31 kDa protein OS=Arabidopsis thaliana GN=SNRNP31 PE=2 SV=1	XP_020088593.1|-80.7|U11/U12 small nuclear ribonucleoprotein 31 kDa protein-like [Ananas comosus]
c216279_g1	cellular_component:autophagosome(GO:0005776);;biological_process:transport(GO:0006810);;biological_process:catabolic autophagy(GO:0006914);;biological_process:protein transport(GO:0015031);;molecular_function:kinase activity(GO:0016301);;biological_process:phosphorylation(GO:0016310);;molecular_function:transferase activity(GO:0016740);;cellular_component:cytoplasmic vesicle(GO:0031410);;molecula…	-	29760.VIT_08s0007g01150.t01|-206.1|ENOG410XR01|T|Unc51-like kinase	PF00069.23|Pkinase|6.3e-74|Protein kinase domain	F4IRW0|ATG1C_ARATH|-176.1|Serine/threonine-protein kinase ATG1c OS=Arabidopsis thaliana GN=ATG1C PE=2 SV=1	XP_020241297.1|-261.3|serine/threonine-protein kinase ATG1c-like isoform X1 [Asparagus officinalis]
c221685_g4	-	-	4577.GRMZM2G464814_P01|-92.6|ENOG410XQ1Y|S|zinc finger	-	-	XP_020266476.1|-105.6|zinc finger MYM-type protein 1-like [Asparagus officinalis]
c197973_g1	-	-	-	-	-	WP_060978109.1|-63.1|MULTISPECIES: XRE family transcriptional regulator [Proteobacteria]
c157827_g2	-	-	-	-	-	XP_010682089.1|-51.5|PREDICTED: NAC domain-containing protein 35 [Beta vulgaris subsp. vulgaris]
c231453_g1	cellular_component:nucleus(GO:0005634);;molecular_function:transferase activity(GO:0016740);;molecular_function:transferase activity, transferring glycosyl groups(GO:0016757);;molecular_function:metal ion binding(GO:0046872);;molecular_function:DNA binding(GO:0003677);;molecular_function:NAD+ ADP-ribosyltransferase activity(GO:0003950);;cellular_component:nucleus(GO:0005634)	egu:105053578|-289.7|K10798|PARP; poly [ADP-ribose] polymerase [EC:2.4.2.30]|ko03410|Base excision repair;;	4538.ORGLA07G0098000.1|-260.5|ENOG410XP18|S|Poly (ADP-ribose) polymerase	PF00644.18|PARP|1.1e-60|Poly(ADP-ribose) polymerase catalytic domain	Q9ZSV1|PARP1_MAIZE|-250.2|Poly [ADP-ribose] polymerase 1 OS=Zea mays GN=PARP1 PE=2 SV=1	XP_020247158.1|-296.9|poly [ADP-ribose] polymerase 1 isoform X1 [Asparagus officinalis]
c213941_g1	cellular_component:nucleus(GO:0005634);;molecular_function:hydrolase activity(GO:0016787);;molecular_function:metal ion binding(GO:0046872);;molecular_function:phosphoprotein phosphatase activity(GO:0004721);;molecular_function:phosphoprotein phosphatase activity(GO:0004721);;cellular_component:nucleus(GO:0005634)	-	4641.GSMUA_Achr9P25950_001|-10000.0|COG0639|T|serine threonine-protein phosphatase	-	Q9SHS7|BSL3_ARATH|-10000.0|Serine/threonine-protein phosphatase BSL3 OS=Arabidopsis thaliana GN=BSL3 PE=1 SV=2	XP_009418973.1|-10000.0|PREDICTED: serine/threonine-protein phosphatase BSL2 homolog [Musa acuminata subsp. malaccensis]
c231597_g2	-	-	-	-	-	KYP64759.1|-82.8|Retrovirus-related Pol polyprotein from transposon TNT 1-94 [Cajanus cajan]
c214104_g1	biological_process:lipid metabolic process(GO:0006629);;biological_process:phosphatidylethanolamine biosynthetic process(GO:0006646);;biological_process:phospholipid biosynthetic process(GO:0008654);;molecular_function:kinase activity(GO:0016301);;biological_process:phosphorylation(GO:0016310);;molecular_function:transferase activity(GO:0016740);;molecular_function:nucleotide binding(GO:0000166);…	pda:103703311|-157.5|K00894|ETNK, EKI; ethanolamine kinase [EC:2.7.1.82]|ko00564|Glycerophospholipid metabolism;;	4641.GSMUA_Achr3P10230_001|-155.4|COG0510|M|Ethanolamine kinase	PF01633.18|Choline_kinase|7.2e-61|Choline/ethanolamine kinase	O81024|EKI_ARATH|-136.5|Probable ethanolamine kinase OS=Arabidopsis thaliana GN=EMB1187 PE=2 SV=1	XP_020242421.1|-163.7|probable ethanolamine kinase [Asparagus officinalis]
c207816_g1	-	-	-	-	-	XP_010939546.1|-53.4|PREDICTED: uncharacterized protein At3g28850-like [Elaeis guineensis]
c225328_g1	-	-	4641.GSMUA_Achr4P05750_001|-169.2|ENOG410YDP6|S|dna binding protein	PF02485.19|Branch|2.3e-82|Core-2/I-Branching enzyme	-	XP_020265925.1|-192.2|uncharacterized protein LOC109841389 [Asparagus officinalis]
c173720_g1	cellular_component:nucleus(GO:0005634);;cellular_component:cytoplasm(GO:0005737);;cellular_component:perinuclear region of cytoplasm(GO:0048471);;molecular_function:RNA binding(GO:0003723);;cellular_component:nucleus(GO:0005634);;cellular_component:nucleus(GO:0005634)	-	4641.GSMUA_Achr9P05920_001|-108.8|ENOG410YBHR|S|SERPINE1 mRNA binding protein 1	-	Q9LVT8|RGGC_ARATH|-79.5|RGG repeats nuclear RNA binding protein C OS=Arabidopsis thaliana GN=RGGC PE=1 SV=1	XP_020269042.1|-118.9|LOW QUALITY PROTEIN: RGG repeats nuclear RNA binding protein A-like [Asparagus officinalis]
c208453_g1	cellular_component:Golgi stack(GO:0005795);;biological_process:transport(GO:0006810);;biological_process:protein transport(GO:0015031);;biological_process:vesicle-mediated transport(GO:0016192);;cellular_component:endoplasmic reticulum(GO:0005783);;cellular_component:endoplasmic reticulum(GO:0005783);;cellular_component:Golgi apparatus(GO:0005794)	-	4538.ORGLA02G0004000.1|-277.9|ENOG4111J6D|U|SEC16 homolog B (S. cerevisiae)	-	Q9FGK9|MAG5_ARATH|-222.9|Protein transport protein SEC16A homolog OS=Arabidopsis thaliana GN=MAG5 PE=1 SV=1	XP_010934956.1|-10000.0|PREDICTED: protein transport protein SEC16A homolog isoform X1 [Elaeis guineensis]
c219677_g1	-	-	-	-	-	XP_020249290.1|-50.1|UPF0481 protein At3g47200-like [Asparagus officinalis]
c225328_g2	-	egu:105038038|-50.7|K02320|POLA1; DNA polymerase alpha subunit A [EC:2.7.7.7]|ko00230|Purine metabolism;;ko00240|Pyrimidine metabolism;;ko03030|DNA replication;;	4558.Sb03g041040.1|-50.7|COG0417|L|DNA polymerase	-	-	XP_020261450.1|-50.9|DNA polymerase alpha catalytic subunit [Asparagus officinalis]
c200912_g1	cellular_component:cytoplasm(GO:0005737);;cellular_component:cytoplasm(GO:0005737);;biological_process:DNA replication(GO:0006260);;biological_process:DNA replication(GO:0006260);;molecular_function:oxidoreductase activity(GO:0016491);;molecular_function:metal ion binding(GO:0046872);;biological_process:oxidation-reduction process(GO:0055114);;molecular_function:ribonucleoside-diphosphate reducta…	tcc:TCM_017203|-162.9|K10808|RRM2; ribonucleoside-diphosphate reductase subunit M2 [EC:1.17.4.1]|ko00230|Purine metabolism;;ko00480|Glutathione metabolism;;ko00240|Pyrimidine metabolism;;	3694.POPTR_0017s09610.1|-161.6|COG0208|F|Provides the precursors necessary for DNA synthesis. Catalyzes the biosynthesis of deoxyribonucleotides from the corresponding ribonucleotides (By similarity)	PF00268.19|Ribonuc_red_sm|5.9e-119|Ribonucleotide reductase, small chain	Q9LSD0|RIR2C_ARATH|-159.2|Ribonucleoside-diphosphate reductase small chain C OS=Arabidopsis thaliana GN=TSO2 PE=1 SV=1	XP_021299300.1|-162.5|ribonucleoside-diphosphate reductase small chain [Herrania umbratica]
c248125_g1	-	-	-	-	-	WP_060977341.1|-84.1|MULTISPECIES: conjugal transfer protein TraG [Proteobacteria]
c104451_g1	-	-	-	PF12897.5|Aminotran_MocR|6.9e-127|Alanine-glyoxylate amino-transferase	-	WP_066926984.1|-155.1|aminotransferase [Methylobacterium sp. CCH5-D2]
c178819_g1	-	-	-	-	-	KZC01211.1|-101.0|hypothetical protein AU375_02569 [Methylobacterium radiotolerans]
c230285_g2	-	-	4641.GSMUA_Achr6P05620_001|-123.7|ENOG410YE2A|S|Protein of unknown function (DUF616)	PF04765.11|DUF616|6.3e-98|Protein of unknown function (DUF616)	-	XP_020251397.1|-134.3|uncharacterized protein LOC109828842 [Asparagus officinalis]
c179312_g1	-	-	3694.POPTR_0013s02200.1|-175.8|ENOG410Z7Z7|S|Pentatricopeptide repeat-containing protein	-	Q9MA85|PP215_ARATH|-161.0|Pentatricopeptide repeat-containing protein At3g05340 OS=Arabidopsis thaliana GN=PCMP-E83 PE=2 SV=2	XP_020266217.1|-198.9|pentatricopeptide repeat-containing protein At3g05340 [Asparagus officinalis]
c206504_g1	-	-	4641.GSMUA_Achr7P15070_001|-125.9|COG2020|O|isoprenylcysteine carboxyl methyltransferase	-	-	XP_020266016.1|-137.5|uncharacterized protein LOC109841458, partial [Asparagus officinalis]
c230141_g3	cellular_component:nucleus(GO:0005634);;biological_process:transcription, DNA-templated(GO:0006351);;biological_process:regulation of transcription, DNA-templated(GO:0006355);;molecular_function:DNA binding(GO:0003677);;molecular_function:calmodulin binding(GO:0005516);;cellular_component:nucleus(GO:0005634)	-	4641.GSMUA_Achr4P20550_001|-131.9|ENOG4111EYI|S|calmodulin binding protein	PF07887.9|Calmodulin_bind|5.8e-104|Calmodulin binding protein-like	C0SV51|CB60C_ARATH|-122.1|Calmodulin-binding protein 60 C OS=Arabidopsis thaliana GN=CBP60C PE=2 SV=1	XP_020265850.1|-134.4|calmodulin-binding protein 60 C-like [Asparagus officinalis]
c230141_g4	-	-	-	-	-	CAN74964.1|-54.6|hypothetical protein VITISV_006810 [Vitis vinifera]
c230285_g4	-	egu:105059563|-80.6|K07441|ALG14; beta-1,4-N-acetylglucosaminyltransferase [EC:2.4.1.141]|ko00510|N-Glycan biosynthesis;;	4641.GSMUA_Achr7P17510_001|-80.7|ENOG4111QSM|S|asparagine-linked glycosylation 14 homolog (S. cerevisiae)	PF08660.9|Alg14|3.4e-63|Oligosaccharide biosynthesis protein Alg14 like	-	XP_020244435.1|-87.2|UDP-N-acetylglucosamine transferase subunit ALG14 homolog [Asparagus officinalis]
c229589_g1	-	-	-	-	-	XP_011621810.1|-59.0|uncharacterized protein LOC105420314, partial [Amborella trichopoda]
c211461_g1	-	-	-	-	-	XP_020275464.1|-115.0|uncharacterized protein LOC109849979 isoform X1 [Asparagus officinalis]
c167064_g1	-	-	-	-	-	OAE31650.1|-48.2|hypothetical protein AXG93_3384s1240 [Marchantia polymorpha subsp. ruderalis]
c228808_g1	-	-	3847.GLYMA07G06460.3|-112.1|ENOG410YAZX|S|NA	-	-	XP_020247498.1|-184.5|proline-, glutamic acid- and leucine-rich protein 1 isoform X2 [Asparagus officinalis]
c210824_g1	-	-	4641.GSMUA_Achr5P15240_001|-64.5|ENOG410Y4BP|U|Activates the ATG1 kinase in a nutritional condition dependent manner through the TOR pathway, leading to autophagy. Also invoved in cytoplasm to vacuole transport (Cvt) and more specifically in Cvt vesicle formation. Seems to play a role in the switching machinery regulating the conversion between the Cvt pathway and autophagy. Finally, ATG13 is als…	-	-	XP_020263770.1|-89.2|autophagy-related protein 13a-like [Asparagus officinalis]
c268810_g1	-	-	-	-	-	WP_082773281.1|-109.5|hypothetical protein [Methylobacterium sp. CCH5-D2]
c15417_g1	-	-	-	-	-	WP_068305947.1|-76.8|DUF2309 domain-containing protein, partial [Porphyrobacter sp. CCH7-A1]
c221822_g1	-	-	3694.POPTR_0012s05700.1|-138.9|ENOG410ZT99|S|Pfam:hATC	-	-	XP_020262750.1|-172.7|zinc finger BED domain-containing protein RICESLEEPER 2-like [Asparagus officinalis]
c177507_g1	-	-	39946.BGIOSGA001792-PA|-91.6|COG2016|J|Rna-binding protein	-	-	XP_020244808.1|-91.8|malignant T-cell-amplified sequence 1 homolog [Asparagus officinalis]
c181601_g1	-	-	4641.GSMUA_Achr7P05550_001|-61.5|COG0515|T|Serine Threonine protein kinase	-	-	XP_009407998.1|-59.3|PREDICTED: probable receptor-like protein kinase At5g18500 [Musa acuminata subsp. malaccensis]
c100615_g1	-	-	-	-	-	WP_086618587.1|-79.3|hypothetical protein [Porphyrobacter tepidarius]
c119318_g1	-	-	384765.SIAM614_24217|-54.8|COG2319|S|wd repeat	-	-	SDO18305.1|-74.4|WD-40 repeat-containing protein [Phyllobacterium sp. OV277]
c181601_g2	cellular_component:membrane(GO:0016020);;cellular_component:membrane(GO:0016020);;cellular_component:integral component of membrane(GO:0016021);;molecular_function:kinase activity(GO:0016301);;biological_process:phosphorylation(GO:0016310);;molecular_function:transferase activity(GO:0016740);;molecular_function:nucleotide binding(GO:0000166);;molecular_function:protein serine/threonine kinase act…	-	4641.GSMUA_Achr4P20010_001|-86.0|COG0515|T|Serine Threonine protein kinase	-	Q9SJG2|Y2296_ARATH|-80.5|Probable receptor-like protein kinase At2g42960 OS=Arabidopsis thaliana GN=At2g42960 PE=3 SV=1	XP_020273001.1|-84.8|probable receptor-like protein kinase At5g18500 [Asparagus officinalis]
c228133_g1	cellular_component:amyloplast(GO:0009501);;cellular_component:chloroplast(GO:0009507);;cellular_component:chloroplast(GO:0009507);;cellular_component:plastid(GO:0009536);;biological_process:embryo development(GO:0009790);;molecular_function:transferase activity(GO:0016740);;biological_process:starch biosynthetic process(GO:0019252);;molecular_function:1,4-alpha-glucan branching enzyme activity(GO…	egu:105058934|-10000.0|K00700|GBE1, glgB; 1,4-alpha-glucan branching enzyme [EC:2.4.1.18]|ko00500|Starch and sucrose metabolism;;	4555.Si009312m|-10000.0|COG0296|G|Catalyzes the formation of the alpha-1,6-glucosidic linkages in glycogen by scission of a 1,4-alpha-linked oligosaccharide from growing alpha-1,4-glucan chains and the subsequent attachment of the oligosaccharide to the alpha-1,6 position (By similarity)	-	Q41058|GLGB1_PEA|-10000.0|1,4-alpha-glucan-branching enzyme 1, chloroplastic/amyloplastic OS=Pisum sativum GN=SBEI PE=1 SV=1	XP_020244980.1|-10000.0|1,4-alpha-glucan-branching enzyme 1, chloroplastic/amyloplastic-like isoform X2 [Asparagus officinalis]
c100759_g1	biological_process:transcription, DNA-templated(GO:0006351);;biological_process:regulation of transcription, DNA-templated(GO:0006355);;biological_process:multicellular organism development(GO:0007275);;molecular_function:DNA binding(GO:0003677);;cellular_component:nucleus(GO:0005634);;cellular_component:nucleus(GO:0005634)	-	3711.Bra036317.1-P|-71.0|COG5147|K|Myblike DNAbinding domain containing protein	-	Q8VZQ2|MYB61_ARATH|-69.1|Transcription factor MYB61 OS=Arabidopsis thaliana GN=MYB61 PE=2 SV=1	XP_011087570.1|-69.3|transcription factor MYB86 [Sesamum indicum]
c158827_g1	-	-	-	-	-	WP_048461883.1|-50.0|nitrogen regulatory protein P-II 1 [Methylobacterium aquaticum]
c217197_g3	biological_process:cell wall organization(GO:0071555);;cellular_component:extracellular region(GO:0005576);;cellular_component:cell wall(GO:0005618);;cellular_component:primary cell wall(GO:0009530)	-	3711.Bra007440.1-P|-96.9|ENOG41119JU|S|Pollen proteins Ole e I like	-	Q9M1G9|EXTN2_ARATH|-71.0|Extensin-2 OS=Arabidopsis thaliana GN=EXT2 PE=2 SV=1	GAV82897.1|-96.2|Pollen_Ole_e_I domain-containing protein [Cephalotus follicularis]
c204168_g1	cellular_component:plastid(GO:0009536);;biological_process:regulation of growth(GO:0040008);;biological_process:translation(GO:0006412);;cellular_component:chloroplast(GO:0009507);;cellular_component:chloroplast(GO:0009507)	-	4558.Sb09g002890.1|-160.0|COG0216|J|Peptide chain release factor 1 directs the termination of translation in response to the peptide chain termination codons UAG and UAA (By similarity)	PF03462.16|PCRF|1.7e-59|PCRF domain	Q8RX79|APG3_ARATH|-64.9|Peptide chain release factor APG3, chloroplastic OS=Arabidopsis thaliana GN=APG3 PE=2 SV=1	XP_020275293.1|-173.0|uncharacterized protein LOC109849821 isoform X1 [Asparagus officinalis]
c199136_g1	molecular_function:hydrolase activity(GO:0016787);;molecular_function:carboxylic ester hydrolase activity(GO:0052689);;molecular_function:carboxylic ester hydrolase activity(GO:0052689)	-	4113.PGSC0003DMT400052119|-168.2|COG0657|I|alpha beta hydrolase fold-3 domain protein	PF07859.11|Abhydrolase_3|5.7e-64|alpha/beta hydrolase fold	Q9LK21|CXE11_ARATH|-163.7|Probable carboxylesterase 11 OS=Arabidopsis thaliana GN=CXE11 PE=2 SV=1	XP_017243828.1|-168.8|PREDICTED: probable carboxylesterase 11 [Daucus carota subsp. sativus]
c93204_g1	-	-	4577.GRMZM2G139441_P01|-58.6|ENOG410ZPPQ|S|NA	-	-	XP_008786517.1|-68.1|PREDICTED: multiple organellar RNA editing factor 1, mitochondrial-like [Phoenix dactylifera]
c209597_g2	cellular_component:nucleus(GO:0005634);;cellular_component:nucleus(GO:0005634);;biological_process:protein ubiquitination(GO:0016567)	-	4641.GSMUA_Achr4P20480_001|-108.9|ENOG410XQ54|S|F-box and leucine-rich repeat protein	-	Q9FDX1|SKIP1_ARATH|-83.2|F-box protein SKIP1 OS=Arabidopsis thaliana GN=SKIP1 PE=1 SV=1	XP_020269732.1|-116.9|F-box protein SKIP1-like [Asparagus officinalis]
c45932_g1	-	-	-	-	-	WP_043073014.1|-71.0|CusA/CzcA family heavy metal efflux RND transporter [Methylobacterium sp. C1]
c235851_g1	-	-	-	-	-	WP_012319160.1|-56.0|hybrid sensor histidine kinase/response regulator [Methylobacterium radiotolerans]
c213217_g2	-	-	3694.POPTR_0003s09120.1|-57.7|ENOG410XQ92|O|ubiquitin carboxyl-terminal hydrolase	-	-	XP_020248080.1|-59.7|ubiquitin carboxyl-terminal hydrolase 21-like isoform X2 [Asparagus officinalis]
c207566_g1	-	-	4538.ORGLA09G0082200.1|-114.8|COG1720|S|family UPF0066	-	-	XP_020271029.1|-122.1|uncharacterized protein LOC109846137 isoform X2 [Asparagus officinalis]
c333112_g1	cellular_component:vacuole(GO:0005773);;cellular_component:vacuole(GO:0005773)	-	-	-	P59082|LFS_ALLCE|-67.3|Lachrymatory-factor synthase OS=Allium cepa GN=LFS PE=1 SV=1	BAC22637.1|-64.3|lachrymatory factor synthase [Allium fistulosum]
c292872_g1	-	-	-	-	-	WP_065908309.1|-49.9|cystathionine beta-lyase [Pseudomonas sp. S1E40]
c115956_g4	-	-	-	-	-	OMP13955.1|-69.0|valyl-tRNA synthetase-like protein [Corchorus olitorius]
c195774_g1	cellular_component:mitochondrion(GO:0005739);;biological_process:mRNA processing(GO:0006397);;biological_process:response to cold(GO:0009409);;molecular_function:RNA binding(GO:0003723);;cellular_component:mitochondrion(GO:0005739);;cellular_component:mitochondrion(GO:0005739)	egu:105056093|-68.2|K12741|HNRNPA1_3; heterogeneous nuclear ribonucleoprotein A1/A3|ko03040|Spliceosome;;	4641.GSMUA_Achr4P03230_001|-67.7|COG0724|S|Rna-binding protein	-	Q9FNR1|RBG3_ARATH|-64.5|Glycine-rich RNA-binding protein 3, mitochondrial OS=Arabidopsis thaliana GN=RBG3 PE=1 SV=1	XP_019710132.1|-70.1|PREDICTED: glycine-rich RNA-binding protein 3, mitochondrial isoform X3 [Elaeis guineensis]
c222966_g1	-	-	15368.BRADI5G07300.1|-161.1|COG5269|K|Transcription factor	-	-	AMD40258.1|-166.9|gonidialess A related factor [Agave tequilana]
c28052_g1	-	-	-	-	-	WP_048461905.1|-71.4|esterase [Methylobacterium aquaticum]
c234683_g1	-	tet:TTHERM_00444470|-52.4|K00789|metK; S-adenosylmethionine synthetase [EC:2.5.1.6]|ko01230|Biosynthesis of amino acids;;ko00270|Cysteine and methionine metabolism;;	-	-	-	XP_001023309.1|-51.5|S-adenosylmethionine synthetase protein [Tetrahymena thermophila SB210]
c206110_g2	-	-	-	-	-	XP_020251624.1|-59.6|uncharacterized protein LOC109828999 [Asparagus officinalis]
c217334_g1	cellular_component:chloroplast(GO:0009507);;cellular_component:chloroplast(GO:0009507);;cellular_component:plastid(GO:0009536);;molecular_function:beta-amylase activity(GO:0016161);;molecular_function:hydrolase activity(GO:0016787);;molecular_function:hydrolase activity, acting on glycosyl bonds(GO:0016798);;molecular_function:amylopectin maltohydrolase activity(GO:0102229);;biological_process:po…	pda:103695546|-215.0|K01177|E3.2.1.2; beta-amylase [EC:3.2.1.2]|ko00500|Starch and sucrose metabolism;;	4641.GSMUA_Achr5P10120_001|-215.0|ENOG410XRH5|S|beta-amylase	PF01373.15|Glyco_hydro_14|1e-131|Glycosyl hydrolase family 14	Q10RZ1|BAMY2_ORYSJ|-199.9|Beta-amylase 2, chloroplastic OS=Oryza sativa subsp. japonica GN=BAMY2 PE=1 SV=1	XP_008775132.1|-214.2|PREDICTED: beta-amylase 1, chloroplastic [Phoenix dactylifera]
c137441_g1	cellular_component:ribosome(GO:0005840);;cellular_component:intracellular ribonucleoprotein complex(GO:0030529)	pda:103702308|-57.2|K02910|RP-L31e, RPL31; large subunit ribosomal protein L31e|ko03010|Ribosome;;	4641.GSMUA_Achr3P03830_001|-57.9|COG2097|J|(ribosomal) protein	-	Q9M573|RL31_PERFR|-54.7|60S ribosomal protein L31 OS=Perilla frutescens GN=RPL31 PE=2 SV=1	XP_020271476.1|-56.4|60S ribosomal protein L31 [Asparagus officinalis]
c95516_g1	-	-	-	-	-	WP_082740405.1|-63.4|alpha/beta hydrolase [Sphingomonas sp. CCH9-F2]
c102396_g1	-	-	29760.VIT_18s0001g14130.t01|-78.7|ENOG410YENA|S|zinc finger	-	-	XP_002276294.1|-76.7|PREDICTED: uncharacterized protein LOC100250572 [Vitis vinifera]
c229195_g1	biological_process:amino acid transport(GO:0006865);;molecular_function:symporter activity(GO:0015293);;cellular_component:membrane(GO:0016020);;cellular_component:integral component of membrane(GO:0016021);;cellular_component:plasma membrane(GO:0005886);;cellular_component:plasma membrane(GO:0005886);;biological_process:transport(GO:0006810)	-	4641.GSMUA_Achr5P23910_001|-169.5|COG0814|E|amino acid transport	PF01490.16|Aa_trans|1.6e-89|Transmembrane amino acid transporter protein	Q9FF99|AAP7_ARATH|-138.3|Probable amino acid permease 7 OS=Arabidopsis thaliana GN=AAP7 PE=2 SV=1	XP_020264279.1|-176.9|probable amino acid permease 7 [Asparagus officinalis]
c194462_g1	biological_process:tricarboxylic acid cycle(GO:0006099);;biological_process:tricarboxylic acid cycle(GO:0006099);;molecular_function:lyase activity(GO:0016829);;molecular_function:fumarate hydratase activity(GO:0004333);;cellular_component:mitochondrion(GO:0005739);;cellular_component:mitochondrion(GO:0005739)	pda:103707932|-181.8|K01679|E4.2.1.2B, fumC; fumarate hydratase, class II [EC:4.2.1.2]|ko01200|Carbon metabolism;;ko00620|Pyruvate metabolism;;ko00020|Citrate cycle (TCA cycle);;	4641.GSMUA_Achr11P21550_001|-181.1|COG0114|C|fumarate hydratase class II	PF00206.18|Lyase_1|1.9e-92|Lyase	P93033|FUM1_ARATH|-171.9|Fumarate hydratase 1, mitochondrial OS=Arabidopsis thaliana GN=FUM1 PE=1 SV=2	XP_020271428.1|-183.0|fumarate hydratase 1, mitochondrial [Asparagus officinalis]
c221798_g1	-	-	4533.OB04G25530.1|-124.0|ENOG410Y8EJ|S|NA	-	-	XP_020259903.1|-159.8|uncharacterized protein LOC109836422 [Asparagus officinalis]
c221572_g1	biological_process:regulation of transcription, DNA-templated(GO:0006355);;cellular_component:nucleus(GO:0005634);;cellular_component:nucleus(GO:0005634);;biological_process:transcription, DNA-templated(GO:0006351)	egu:105033127|-226.2|K12824|TCERG1, CA150; transcription elongation regulator 1|ko03040|Spliceosome;;	29760.VIT_01s0010g01440.t01|-214.6|ENOG410XPZW|A|transcription elongation regulator	-	Q9LT25|PR40C_ARATH|-187.7|Pre-mRNA-processing protein 40C OS=Arabidopsis thaliana GN=MED35C PE=1 SV=1	XP_020250227.1|-240.1|pre-mRNA-processing protein 40C [Asparagus officinalis]
c194462_g2	biological_process:tricarboxylic acid cycle(GO:0006099);;biological_process:tricarboxylic acid cycle(GO:0006099);;molecular_function:lyase activity(GO:0016829);;molecular_function:fumarate hydratase activity(GO:0004333);;cellular_component:mitochondrion(GO:0005739);;cellular_component:mitochondrion(GO:0005739)	nnu:104598878|-50.3|K01679|E4.2.1.2B, fumC; fumarate hydratase, class II [EC:4.2.1.2]|ko01200|Carbon metabolism;;ko00620|Pyruvate metabolism;;ko00020|Citrate cycle (TCA cycle);;	4577.GRMZM2G010823_P01|-51.2|COG0114|C|fumarate hydratase class II	-	P93033|FUM1_ARATH|-52.3|Fumarate hydratase 1, mitochondrial OS=Arabidopsis thaliana GN=FUM1 PE=1 SV=2	OAY76228.1|-50.3|Fumarate hydratase 1, mitochondrial [Ananas comosus]
c232878_g1	-	-	384765.SIAM614_05563|-86.7|COG0726|G|4-amino-4-deoxy-alpha-L-arabinopyranosyl undecaprenyl phosphate biosynthetic process	-	-	WP_056107209.1|-113.0|MULTISPECIES: polysaccharide deacetylase [Mesorhizobium]
c232652_g1	-	-	4641.GSMUA_Achr3P17130_001|-163.8|COG1073|S|Hydrolase	-	-	XP_020245896.1|-173.3|protein ABHD17B-like [Asparagus officinalis]
c220935_g2	biological_process:transport(GO:0006810);;biological_process:lipid transport(GO:0006869)	-	4641.GSMUA_Achr8P18990_001|-96.6|ENOG410YFEA|U|glycolipid transport	-	O22797|GLTP1_ARATH|-89.7|Glycolipid transfer protein 1 OS=Arabidopsis thaliana GN=GLTP1 PE=2 SV=1	ONK70712.1|-101.4|uncharacterized protein A4U43_C04F740 [Asparagus officinalis]
c204449_g1	biological_process:proteolysis(GO:0006508);;molecular_function:peptidase activity(GO:0008233);;molecular_function:hydrolase activity(GO:0016787)	-	3694.POPTR_0002s17270.1|-166.9|ENOG410XNV7|O|aspartic	-	Q9LNJ3|APF2_ARATH|-151.3|Aspartyl protease family protein 2 OS=Arabidopsis thaliana GN=APF2 PE=2 SV=1	XP_009394177.1|-183.1|PREDICTED: aspartyl protease family protein 2-like [Musa acuminata subsp. malaccensis]
c216166_g1	-	-	39947.LOC_Os07g24090.1|-52.0|ENOG410XT49|S|mitochondrial transcription termination	-	-	XP_020250225.1|-70.1|uncharacterized protein LOC109827619 [Asparagus officinalis]
c180858_g1	-	-	4641.GSMUA_Achr3P16460_001|-177.5|ENOG410XTFA|O|protein folding	-	-	XP_020264075.1|-197.7|uncharacterized protein LOC109840000 isoform X1 [Asparagus officinalis]
c227102_g1	-	-	4641.GSMUA_Achr11P04750_001|-114.2|ENOG410XQFX|S|kiaa0430	-	-	XP_020273538.1|-117.8|uncharacterized protein LOC109848450 [Asparagus officinalis]
c192575_g1	cellular_component:chloroplast(GO:0009507);;cellular_component:chloroplast(GO:0009507);;cellular_component:plastid(GO:0009536)	-	4641.GSMUA_Achr11P14370_001|-183.9|ENOG410Z7Z7|S|Pentatricopeptide repeat-containing protein	-	Q9SQU6|PP216_ARATH|-170.6|Pentatricopeptide repeat-containing protein At3g06430, chloroplastic OS=Arabidopsis thaliana GN=EMB2750 PE=2 SV=1	ONK63071.1|-196.7|uncharacterized protein A4U43_C07F11110 [Asparagus officinalis]
c158495_g1	-	-	4513.MLOC_61454.3|-90.2|ENOG410YAVA|S|IQ-domain	-	-	XP_010931042.1|-115.0|PREDICTED: protein IQ-DOMAIN 31-like isoform X1 [Elaeis guineensis]
c220260_g1	cellular_component:membrane(GO:0016020);;cellular_component:membrane(GO:0016020);;cellular_component:integral component of membrane(GO:0016021);;molecular_function:calmodulin binding(GO:0005516);;biological_process:defense response(GO:0006952);;biological_process:response to biotic stimulus(GO:0009607)	-	15368.BRADI2G25190.1|-192.6|ENOG410ZUVB|D|May be involved in modulation of pathogen defense and leaf cell death (By similarity)	PF03094.13|Mlo|1.5e-186|Mlo family	O80580|MLO15_ARATH|-129.9|MLO-like protein 15 OS=Arabidopsis thaliana GN=MLO15 PE=2 SV=1	XP_020261884.1|-206.9|MLO-like protein 1 isoform X2 [Asparagus officinalis]
c134386_g1	-	-	-	-	-	WP_060979816.1|-104.4|MULTISPECIES: amidohydrolase [Proteobacteria]
c197860_g2	-	-	3847.GLYMA19G36860.1|-191.8|COG0175|P|Reduction of activated sulfate into sulfite (By similarity)	-	-	XP_010940690.1|-216.1|PREDICTED: FAD synthase isoform X1 [Elaeis guineensis]
c162671_g1	-	-	3694.POPTR_0001s46010.1|-53.5|ENOG411298Q|S|NA	-	-	XP_020252301.1|-58.1|uncharacterized protein LOC109829662 [Asparagus officinalis]
c214135_g1	molecular_function:methyltransferase activity(GO:0008168);;biological_process:cellular amino acid biosynthetic process(GO:0008652);;biological_process:methionine biosynthetic process(GO:0009086);;molecular_function:transferase activity(GO:0016740);;biological_process:methylation(GO:0032259);;molecular_function:metal ion binding(GO:0046872);;molecular_function:5-methyltetrahydropteroyltriglutamate…	egu:105053250|-10000.0|K00549|metE; 5-methyltetrahydropteroyltriglutamate--homocysteine methyltransferase [EC:2.1.1.14]|ko01230|Biosynthesis of amino acids;;ko00270|Cysteine and methionine metabolism;;ko00450|Selenocompound metabolism;;	4641.GSMUA_Achr4P21470_001|-10000.0|COG0620|E|Catalyzes the transfer of a methyl group from 5- methyltetrahydrofolate to homocysteine resulting in methionine formation (By similarity)	PF01717.16|Meth_synt_2|1.7e-158|Cobalamin-independent synthase, Catalytic domain	Q2QLY4|METE2_ORYSJ|-10000.0|5-methyltetrahydropteroyltriglutamate--homocysteine methyltransferase 2 OS=Oryza sativa subsp. japonica GN=Os12g0624000 PE=2 SV=1	XP_020268464.1|-10000.0|5-methyltetrahydropteroyltriglutamate--homocysteine methyltransferase 2-like isoform X1 [Asparagus officinalis]
c230703_g2	cellular_component:plasma membrane(GO:0005886);;cellular_component:plasma membrane(GO:0005886);;cellular_component:membrane(GO:0016020);;cellular_component:integral component of membrane(GO:0016021);;molecular_function:kinase activity(GO:0016301);;biological_process:phosphorylation(GO:0016310);;molecular_function:transferase activity(GO:0016740);;molecular_function:nucleotide binding(GO:0000166);…	-	4113.PGSC0003DMT400033812|-91.3|COG4886|S|leucine Rich Repeat	-	Q8VZG8|MIK2_ARATH|-75.7|MDIS1-interacting receptor like kinase 2 OS=Arabidopsis thaliana GN=MIK2 PE=1 SV=3	XP_019709202.1|-97.2|PREDICTED: MDIS1-interacting receptor like kinase 2-like [Elaeis guineensis]
c190626_g1	molecular_function:metal ion binding(GO:0046872);;molecular_function:phosphoprotein phosphatase activity(GO:0004721);;molecular_function:phosphoprotein phosphatase activity(GO:0004721);;molecular_function:hydrolase activity(GO:0016787)	-	4555.Si021863m|-110.0|COG0631|T|Phosphatase	PF00481.19|PP2C|2.2e-65|Protein phosphatase 2C	Q94AT1|P2C76_ARATH|-110.8|Probable protein phosphatase 2C 76 OS=Arabidopsis thaliana GN=At5g53140 PE=2 SV=1	XP_004961053.1|-107.9|PREDICTED: probable protein phosphatase 2C 52 [Setaria italica]
c214135_g2	molecular_function:methyltransferase activity(GO:0008168);;biological_process:cellular amino acid biosynthetic process(GO:0008652);;biological_process:methionine biosynthetic process(GO:0009086);;molecular_function:transferase activity(GO:0016740);;biological_process:methylation(GO:0032259);;molecular_function:metal ion binding(GO:0046872);;molecular_function:5-methyltetrahydropteroyltriglutamate…	egu:105053250|-129.2|K00549|metE; 5-methyltetrahydropteroyltriglutamate--homocysteine methyltransferase [EC:2.1.1.14]|ko01230|Biosynthesis of amino acids;;ko00270|Cysteine and methionine metabolism;;ko00450|Selenocompound metabolism;;	4641.GSMUA_Achr7P01530_001|-128.6|COG0620|E|Catalyzes the transfer of a methyl group from 5- methyltetrahydrofolate to homocysteine resulting in methionine formation (By similarity)	PF01717.16|Meth_synt_2|6.4e-111|Cobalamin-independent synthase, Catalytic domain	Q2QLY4|METE2_ORYSJ|-128.4|5-methyltetrahydropteroyltriglutamate--homocysteine methyltransferase 2 OS=Oryza sativa subsp. japonica GN=Os12g0624000 PE=2 SV=1	XP_020268461.1|-130.6|5-methyltetrahydropteroyltriglutamate--homocysteine methyltransferase 2-like isoform X1 [Asparagus officinalis]
c327742_g1	-	-	-	-	-	KTE20673.1|-60.1|conjugal transfer protein TrbL [Sphingopyxis sp. H050]
c184975_g1	-	cit:102607526|-59.5|K10880|XRCC3; DNA-repair protein XRCC3|ko03440|Homologous recombination;;	4113.PGSC0003DMT400052651|-55.1|COG0468|L|Can catalyze the hydrolysis of ATP in the presence of single-stranded DNA, the ATP-dependent uptake of single-stranded DNA by duplex DNA, and the ATP-dependent hybridization of homologous single-stranded DNAs. It interacts with LexA causing its activation and leading to its autocatalytic cleavage (By similarity)	-	-	KZV29574.1|-61.0|hypothetical protein F511_00852 [Dorcoceras hygrometricum]
c219420_g1	-	dosa:Os02t0722800-01|-49.4|K12616|EDC4; enhancer of mRNA-decapping protein 4|ko03018|RNA degradation;;	4538.ORGLA02G0261900.1|-50.6|ENOG410XP6V|S|Enhancer of mRNA decapping 4	-	-	BAF09883.1|-48.6|Os02g0722800 [Oryza sativa Japonica Group]
c167626_g1	-	-	3694.POPTR_0010s10560.1|-55.0|ENOG410Y6A1|S|LSM12 homolog (S. cerevisiae)	-	-	XP_020264570.1|-70.6|uncharacterized protein LOC109840360 [Asparagus officinalis]
c196218_g1	-	mus:103986147|-95.2|K00164|OGDH, sucA; 2-oxoglutarate dehydrogenase E1 component [EC:1.2.4.2]|ko00020|Citrate cycle (TCA cycle);;ko01200|Carbon metabolism;;ko00380|Tryptophan metabolism;;ko00310|Lysine degradation;;	3694.POPTR_0010s21610.1|-94.5|COG0567|C|2-oxoglutarate dehydrogenase, E1	-	-	XP_020267760.1|-98.4|2-oxoglutarate dehydrogenase, mitochondrial-like [Asparagus officinalis]
c178706_g1	molecular_function:ATP binding(GO:0005524);;cellular_component:nucleus(GO:0005634);;cellular_component:nucleolus(GO:0005730);;biological_process:rRNA processing(GO:0006364);;molecular_function:hydrolase activity(GO:0016787);;biological_process:ribosome biogenesis(GO:0042254);;molecular_function:nucleotide binding(GO:0000166);;molecular_function:RNA binding(GO:0003723);;molecular_function:helicase…	-	4641.GSMUA_Achr11P06200_001|-74.1|COG0513|L|purine NTP-dependent helicase activity	-	Q6YS30|RH5_ORYSJ|-70.2|DEAD-box ATP-dependent RNA helicase 5 OS=Oryza sativa subsp. japonica GN=Os07g0301200 PE=2 SV=1	ONK71542.1|-87.0|uncharacterized protein A4U43_C04F9710 [Asparagus officinalis]
c206679_g1	-	-	59689.fgenesh1_pm.C_scaffold_3002062|-113.0|COG5184|DZ|regulator of chromosome condensation	-	-	XP_006300269.1|-118.4|hypothetical protein CARUB_v100164060mg, partial [Capsella rubella]
c190095_g1	-	-	4641.GSMUA_Achr5P20090_001|-88.6|ENOG410YA5M|S|IQ calmodulin-binding motif family protein	-	-	XP_009401769.1|-87.9|PREDICTED: protein IQ-DOMAIN 31-like [Musa acuminata subsp. malaccensis]
c161029_g1	-	-	4641.GSMUA_Achr9P12400_001|-110.6|COG1028|S|Dehydrogenase reductase	-	-	XP_009417296.1|-108.6|PREDICTED: uncharacterized protein LOC103997715 [Musa acuminata subsp. malaccensis]
c178706_g2	molecular_function:ATP binding(GO:0005524);;cellular_component:nucleus(GO:0005634);;cellular_component:nucleolus(GO:0005730);;biological_process:rRNA processing(GO:0006364);;molecular_function:hydrolase activity(GO:0016787);;biological_process:ribosome biogenesis(GO:0042254);;molecular_function:nucleotide binding(GO:0000166);;molecular_function:RNA binding(GO:0003723);;molecular_function:helicase…	-	4555.Si029524m|-129.1|COG0513|L|purine NTP-dependent helicase activity	-	Q6YS30|RH5_ORYSJ|-127.3|DEAD-box ATP-dependent RNA helicase 5 OS=Oryza sativa subsp. japonica GN=Os07g0301200 PE=2 SV=1	OAY80230.1|-128.1|DEAD-box ATP-dependent RNA helicase 5, partial [Ananas comosus]
c219420_g4	cellular_component:cytoplasm(GO:0005737);;biological_process:mRNA processing(GO:0006397);;biological_process:post-embryonic development(GO:0009791);;biological_process:root meristem specification(GO:0010071);;biological_process:primary shoot apical meristem specification(GO:0010072);;biological_process:primary shoot apical meristem specification(GO:0010072);;biological_process:cellular response t…	egu:105038171|-256.1|K12616|EDC4; enhancer of mRNA-decapping protein 4|ko03018|RNA degradation;;	4641.GSMUA_Achr5P04250_001|-214.5|ENOG410XP6V|S|Enhancer of mRNA decapping 4	-	Q9LTT8|VCS_ARATH|-197.7|Enhancer of mRNA-decapping protein 4 OS=Arabidopsis thaliana GN=VCS PE=1 SV=1	XP_017695886.1|-257.9|PREDICTED: enhancer of mRNA-decapping protein 4-like [Phoenix dactylifera]
c219420_g5	-	-	15368.BRADI1G01110.1|-93.0|COG0724|S|Rna-binding protein	-	-	XP_020260792.1|-122.4|RNA-binding protein 34 [Asparagus officinalis]
c217615_g1	cellular_component:nucleus(GO:0005634);;biological_process:transcription, DNA-templated(GO:0006351);;biological_process:regulation of transcription, DNA-templated(GO:0006355);;molecular_function:DNA binding(GO:0003677);;molecular_function:DNA binding(GO:0003677);;cellular_component:nucleus(GO:0005634)	-	29760.VIT_00s0299g00100.t01|-78.9|ENOG410Z2UE|K|homeobox-leucine zipper protein	-	P46601|HAT2_ARATH|-71.1|Homeobox-leucine zipper protein HAT2 OS=Arabidopsis thaliana GN=HAT2 PE=1 SV=2	XP_008796136.1|-84.0|PREDICTED: homeobox-leucine zipper protein HAT4-like [Phoenix dactylifera]
c172109_g1	biological_process:protein ubiquitination(GO:0016567)	-	4641.GSMUA_Achr6P24370_001|-127.0|ENOG4110X8D|S|Kelch repeat-containing F-box family protein	-	Q9M1W7|SKI30_ARATH|-114.1|F-box/kelch-repeat protein SKIP30 OS=Arabidopsis thaliana GN=SKIP30 PE=1 SV=2	XP_020274355.1|-143.5|F-box/kelch-repeat protein SKIP30 [Asparagus officinalis]
c102677_g1	-	-	-	-	-	WP_066213027.1|-66.7|hypothetical protein [Blastomonas sp. CCH5-A3]
c229332_g1	-	-	39947.LOC_Os02g12320.1|-56.0|COG2801|L|Retrotransposon protein	-	-	XP_019075410.1|-58.6|PREDICTED: uncharacterized protein LOC109122600 [Vitis vinifera]
c206679_g3	-	-	59689.fgenesh1_pm.C_scaffold_3002062|-88.7|COG5184|DZ|regulator of chromosome condensation	-	-	XP_020259682.1|-94.0|uncharacterized protein LOC109836225 [Asparagus officinalis]
c223884_g4	cellular_component:mitochondrion(GO:0005739);;cellular_component:mitochondrion(GO:0005739)	-	4555.Si038542m|-225.4|ENOG410Z7Z7|S|Pentatricopeptide repeat-containing protein	-	Q9SI53|PP147_ARATH|-136.3|Pentatricopeptide repeat-containing protein At2g03880, mitochondrial OS=Arabidopsis thaliana GN=PCMP-H44 PE=2 SV=1	XP_020246943.1|-254.5|putative pentatricopeptide repeat-containing protein At5g52630 [Asparagus officinalis]
c228839_g1	cellular_component:chloroplast(GO:0009507);;cellular_component:plastid(GO:0009536);;molecular_function:rRNA binding(GO:0019843);;cellular_component:intracellular ribonucleoprotein complex(GO:0030529);;molecular_function:RNA binding(GO:0003723);;cellular_component:ribosome(GO:0005840);;cellular_component:chloroplast(GO:0009507)	egu:12079393|-102.7|K02986|RP-S4, rpsD; small subunit ribosomal protein S4|ko03010|Ribosome;;	4081.Solyc01g007280.2.1|-95.5|COG0522|J|One of the primary rRNA binding proteins, it binds directly to 16S rRNA where it nucleates assembly of the body of the 30S subunit (By similarity)	-	P69629|RR4_AGABR|-103.8|30S ribosomal protein S4, chloroplastic (Fragment) OS=Agave bracteosa GN=rps4 PE=3 SV=1	YP_009317119.1|-108.8|ribosomal protein S4 (chloroplast) [Allium sativum]
c286497_g1	-	-	-	-	-	WP_071537974.1|-76.7|MULTISPECIES: thiol-disulfide isomerase [Proteobacteria]
c258068_g1	-	-	-	-	-	AJF38887.1|-52.8|polyprotein, partial [Bean common mosaic virus strain peanut stripe]
c239919_g1	-	-	-	-	-	ERF82281.1|-52.7|aquaporin Z [Bradyrhizobium sp. DFCI-1]
c223884_g5	-	-	3694.POPTR_0013s00810.1|-143.0|ENOG410Z7Z7|S|Pentatricopeptide repeat-containing protein	-	Q9FXA9|PPR83_ARATH|-112.7|Putative pentatricopeptide repeat-containing protein At1g56570 OS=Arabidopsis thaliana GN=PCMP-E64 PE=3 SV=1	XP_008804283.1|-156.3|PREDICTED: putative pentatricopeptide repeat-containing protein At1g56570 [Phoenix dactylifera]
c160191_g1	-	mor:MOC_2369|-62.7|K00941|thiD; hydroxymethylpyrimidine/phosphomethylpyrimidine kinase [EC:2.7.1.49 2.7.4.7]|ko00730|Thiamine metabolism;;	-	-	-	WP_066921412.1|-89.9|hydroxymethylpyrimidine/phosphomethylpyrimidine kinase [Methylobacterium sp. CCH5-D2]
c269004_g1	-	-	-	-	-	WP_066918243.1|-131.0|hypothetical protein [Methylobacterium sp. CCH5-D2]
c222490_g2	-	-	39947.LOC_Os01g66240.1|-138.6|ENOG410XR4B|S|NA	-	-	XP_020273978.1|-154.3|protein ABHD11 [Asparagus officinalis]
c205223_g1	-	-	3847.GLYMA18G00570.1|-77.8|ENOG4111NE8|S|histidine protein methyltransferase 1 homolog	-	-	XP_010527454.1|-82.9|PREDICTED: histidine protein methyltransferase 1 homolog [Tarenaya hassleriana]
c181858_g1	cellular_component:plasma membrane(GO:0005886);;cellular_component:plasma membrane(GO:0005886);;cellular_component:membrane(GO:0016020);;molecular_function:kinase activity(GO:0016301);;biological_process:phosphorylation(GO:0016310);;molecular_function:transferase activity(GO:0016740);;molecular_function:nucleotide binding(GO:0000166);;molecular_function:protein serine/threonine kinase activity(GO…	jcu:105646432|-240.9|K14500|BSK; BR-signaling kinase [EC:2.7.11.1]|ko04075|Plant hormone signal transduction;;	3694.POPTR_0004s19340.1|-238.1|ENOG410YDRD|T|STYKc	-	Q944A7|Y4523_ARATH|-233.6|Probable serine/threonine-protein kinase At4g35230 OS=Arabidopsis thaliana GN=At4g35230 PE=1 SV=1	XP_020595276.1|-244.3|probable serine/threonine-protein kinase At4g35230 [Phalaenopsis equestris]
c42483_g1	-	-	29760.VIT_19s0014g02650.t01|-59.1|ENOG410XQ7M|S|Glucosaminyl (N-acetyl) transferase	-	-	XP_020245345.1|-67.3|beta-glucuronosyltransferase GlcAT14B-like [Asparagus officinalis]
c285185_g1	-	-	29760.VIT_06s0004g02380.t01|-63.1|COG0451|M|Nad-dependent epimerase dehydratase	-	-	XP_020697603.1|-63.6|cinnamoyl-CoA reductase 1-like [Dendrobium catenatum]
c220541_g1	-	-	4641.GSMUA_Achr6P21230_001|-54.5|ENOG4111TJM|S|Protein of unknown function (DUF565)	-	-	XP_020253434.1|-55.5|uncharacterized protein LOC109830554 isoform X1 [Asparagus officinalis]
c123587_g1	-	-	-	-	-	WP_048465319.1|-78.0|histidine kinase [Methylobacterium aquaticum]
c220541_g2	biological_process:fatty acid metabolic process(GO:0006631);;biological_process:fatty acid biosynthetic process(GO:0006633);;biological_process:fatty acid biosynthetic process(GO:0006633);;cellular_component:membrane(GO:0016020);;cellular_component:integral component of membrane(GO:0016021);;molecular_function:oxidoreductase activity(GO:0016491);;biological_process:oxidation-reduction process(GO:…	pda:103714454|-76.6|K10251|HSD17B12, KAR, IFA38; 17beta-estradiol 17-dehydrogenase / very-long-chain 3-oxoacyl-CoA reductase [EC:1.1.1.62 1.1.1.330]|ko01212|Fatty acid metabolism;;ko01040|Biosynthesis of unsaturated fatty acids;;ko00062|Fatty acid elongation;;	4113.PGSC0003DMT400027906|-72.5|COG0300|S|Dehydrogenase	-	Q8L9C4|KCR1_ARATH|-66.8|Very-long-chain 3-oxoacyl-CoA reductase 1 OS=Arabidopsis thaliana GN=KCR1 PE=1 SV=1	XP_008799929.1|-75.8|PREDICTED: very-long-chain 3-oxoacyl-CoA reductase 1 [Phoenix dactylifera]
c260439_g1	-	-	-	-	-	WP_035037875.1|-51.0|acetyltransferase [Aquabacterium sp. NJ1]
c215279_g1	-	-	-	-	-	XP_012833453.1|-54.3|PREDICTED: uncharacterized protein LOC105954326 [Erythranthe guttata]
c225970_g1	-	-	15368.BRADI3G53040.1|-227.1|COG5210|S|TBC1 domain family member	-	-	XP_020270697.1|-10000.0|TBC1 domain family member 15 [Asparagus officinalis]
c199023_g1	-	pda:103719274|-10000.0|K12200|PDCD6IP, ALIX, RIM20; programmed cell death 6-interacting protein|ko04144|Endocytosis;;	4555.Si034208m|-10000.0|ENOG410XQX6|S|Rhophilin, Rho GTPase binding protein	PF03097.16|BRO1|2.1e-103|BRO1-like domain	-	XP_020248980.1|-10000.0|ALG-2 interacting protein X [Asparagus officinalis]
c225970_g2	-	-	3847.GLYMA03G03280.1|-201.3|COG0778|C|nitroreductase	-	-	XP_020219793.1|-203.2|uncharacterized protein LOC109802809 [Cajanus cajan]
c226215_g1	cellular_component:cytosol(GO:0005829);;molecular_function:kinase activity(GO:0016301);;biological_process:phosphorylation(GO:0016310);;molecular_function:transferase activity(GO:0016740);;molecular_function:metal ion binding(GO:0046872);;molecular_function:nucleotide binding(GO:0000166);;molecular_function:ATP binding(GO:0005524);;cellular_component:cytoplasm(GO:0005737)	-	4641.GSMUA_Achr9P13450_001|-162.2|ENOG410XSWS|T|ste20-related kinase adaptor	PF00069.23|Pkinase|3.7e-60|Protein kinase domain	O23304|BLUS1_ARATH|-70.8|Serine/threonine-protein kinase BLUS1 OS=Arabidopsis thaliana GN=BLUS1 PE=1 SV=1	XP_020269811.1|-222.6|serine/threonine-protein kinase BLUS1-like [Asparagus officinalis]
c208765_g2	-	-	-	-	-	WP_060978864.1|-65.4|MULTISPECIES: hypothetical protein [Proteobacteria]
c226133_g2	molecular_function:protein binding(GO:0005515);;cellular_component:nucleus(GO:0005634);;cellular_component:nucleus(GO:0005634);;cellular_component:cytoplasm(GO:0005737);;cellular_component:cytoplasm(GO:0005737);;cellular_component:cytoplasm(GO:0005737);;biological_process:transcription, DNA-templated(GO:0006351);;biological_process:regulation of transcription, DNA-templated(GO:0006355);;molecular…	-	4641.GSMUA_Achr8P14980_001|-107.7|ENOG410XNN8|S|mRNA transport	-	Q9SR13|FLK_ARATH|-70.7|Flowering locus K homology domain OS=Arabidopsis thaliana GN=FLK PE=1 SV=1	XP_020263342.1|-130.7|RNA-binding KH domain-containing protein PEPPER-like, partial [Asparagus officinalis]
c167907_g1	-	-	-	-	-	WP_066920245.1|-133.5|short-chain dehydrogenase [Methylobacterium sp. CCH5-D2]
c169181_g1	-	-	3847.GLYMA09G36315.1|-106.5|ENOG410Y7MJ|S|RING	-	-	XP_010923161.1|-108.4|PREDICTED: chromatin modification-related protein eaf-1 isoform X1 [Elaeis guineensis]
c52395_g1	cellular_component:plasma membrane(GO:0005886);;cellular_component:plasma membrane(GO:0005886);;biological_process:single fertilization(GO:0007338);;cellular_component:membrane(GO:0016020);;cellular_component:integral component of membrane(GO:0016021);;molecular_function:kinase activity(GO:0016301);;biological_process:phosphorylation(GO:0016310);;molecular_function:transferase activity(GO:0016740…	-	29760.VIT_05s0077g00970.t01|-79.6|COG0515|T|Serine Threonine protein kinase	-	Q3E8W4|ANX2_ARATH|-78.2|Receptor-like protein kinase ANXUR2 OS=Arabidopsis thaliana GN=ANX2 PE=2 SV=1	ONK63562.1|-79.3|uncharacterized protein A4U43_C07F16540 [Asparagus officinalis]
c226133_g4	-	-	-	-	-	KZV49819.1|-49.2|hypothetical protein F511_44841 [Dorcoceras hygrometricum]
c179768_g1	-	-	-	-	-	WP_066284897.1|-49.2|chemotaxis protein [Blastomonas sp. CCH1-A6]
c230453_g2	-	-	39947.LOC_Os08g30250.1|-78.3|ENOG410YDSI|S|Transposase family tnp2	-	-	XP_011007650.1|-183.2|PREDICTED: uncharacterized protein LOC105113251 [Populus euphratica]
c213104_g1	-	-	29760.VIT_18s0001g15710.t01|-92.5|COG0526|O|Thioredoxin	-	-	XP_020249912.1|-110.0|uncharacterized protein LOC109827335 [Asparagus officinalis]
c231765_g6	molecular_function:protein binding(GO:0005515);;molecular_function:protein binding(GO:0005515);;molecular_function:protein binding(GO:0005515);;molecular_function:ATP binding(GO:0005524);;cellular_component:plasma membrane(GO:0005886);;cellular_component:plasma membrane(GO:0005886);;biological_process:brassinosteroid mediated signaling pathway(GO:0009742);;cellular_component:membrane(GO:0016020);…	egu:105049690|-10000.0|K13415|BRI1; protein brassinosteroid insensitive 1 [EC:2.7.10.1 2.7.11.1]|ko04075|Plant hormone signal transduction;;	29760.VIT_07s0031g01850.t01|-10000.0|COG4886|S|leucine Rich Repeat	-	Q942F3|BRI1_ORYSJ|-10000.0|Brassinosteroid LRR receptor kinase BRI1 OS=Oryza sativa subsp. japonica GN=BRI1 PE=1 SV=1	XP_020260775.1|-10000.0|brassinosteroid LRR receptor kinase BRI1-like, partial [Asparagus officinalis]
c219701_g3	molecular_function:nuclease activity(GO:0004518);;molecular_function:endonuclease activity(GO:0004519);;biological_process:proteolysis(GO:0006508);;molecular_function:peptidase activity(GO:0008233);;molecular_function:transferase activity(GO:0016740);;molecular_function:nucleotidyltransferase activity(GO:0016779);;molecular_function:hydrolase activity(GO:0016787);;molecular_function:metal ion bin…	adu:107466525|-129.5|K03006|RPB1, POLR2A; DNA-directed RNA polymerase II subunit RPB1 [EC:2.7.7.6]|ko03020|RNA polymerase;;ko00230|Purine metabolism;;ko00240|Pyrimidine metabolism;;	39947.LOC_Os03g05850.1|-131.9|ENOG410XS4D|S|Retrotransposon protein	PF07727.12|RVT_2|2.8e-95|Reverse transcriptase (RNA-dependent DNA polymerase)	P10978|POLX_TOBAC|-99.0|Retrovirus-related Pol polyprotein from transposon TNT 1-94 OS=Nicotiana tabacum PE=2 SV=1	CAN74536.1|-186.8|hypothetical protein VITISV_023111 [Vitis vinifera]
c206816_g1	-	-	-	-	-	XP_008783094.1|-62.9|PREDICTED: protein ENDOSPERM DEFECTIVE 1-like [Phoenix dactylifera]
c73918_g1	-	-	4641.GSMUA_Achr4P18790_001|-175.6|COG4775|M|Gram-negative-bacterium-type cell outer membrane assembly	-	-	XP_020241017.1|-192.4|SAM50-like protein SPAC17C9.06 [Asparagus officinalis]
c226359_g5	-	-	4558.Sb02g034070.1|-182.1|COG4886|S|leucine Rich Repeat	PF12819.5|Malectin_like|6.9e-64|Carbohydrate-binding protein of the ER	-	ONK74904.1|-201.3|uncharacterized protein A4U43_C03F11310 [Asparagus officinalis]
c85635_g1	-	-	-	-	-	WP_066282287.1|-77.2|NAD-dependent dehydratase [Blastomonas sp. CCH1-A6]
c218677_g1	-	-	-	-	-	XP_020245119.1|-59.1|uncharacterized protein LOC109823241 isoform X2 [Asparagus officinalis]
c229757_g1	molecular_function:hydrolase activity(GO:0016787);;molecular_function:alpha-L-arabinofuranosidase activity(GO:0046556);;cellular_component:extracellular region(GO:0005576);;cellular_component:proteinaceous extracellular matrix(GO:0005578);;cellular_component:proteinaceous extracellular matrix(GO:0005578)	egu:105045517|-274.8|K01209|abfA; alpha-N-arabinofuranosidase [EC:3.2.1.55]|ko00520|Amino sugar and nucleotide sugar metabolism;;	4641.GSMUA_Achr8P23950_001|-271.2|COG3534|G|Alpha-N-arabinofuranosidase (EC 3.2.1.55)	-	Q9SG80|ASD1_ARATH|-241.3|Alpha-L-arabinofuranosidase 1 OS=Arabidopsis thaliana GN=ASD1 PE=1 SV=1	XP_020249691.1|-293.0|alpha-L-arabinofuranosidase 1-like [Asparagus officinalis]
c195661_g1	cellular_component:cytoplasm(GO:0005737);;cellular_component:cytosol(GO:0005829);;cellular_component:cytosol(GO:0005829)	atr:18434622|-100.2|K03115|CSNK2B; casein kinase II subunit beta|ko04712|Circadian rhythm - plant;;ko03008|Ribosome biogenesis in eukaryotes;;	4641.GSMUA_Achr6P11870_001|-97.0|COG5041|DKT|casein kinase ii	PF01214.16|CK_II_beta|4e-74|Casein kinase II regulatory subunit	O80507|CSK2E_ARATH|-82.4|Putative casein kinase II subunit beta-4 OS=Arabidopsis thaliana GN=CKB4 PE=1 SV=1	XP_020245788.1|-104.4|putative casein kinase II subunit beta-4 isoform X1 [Asparagus officinalis]
c178312_g1	-	-	-	-	-	XP_008803607.1|-57.8|PREDICTED: pentatricopeptide repeat-containing protein At1g11630, mitochondrial-like [Phoenix dactylifera]
c229757_g2	-	-	4641.GSMUA_Achr6P36290_001|-59.5|ENOG4111MWH|U|cornichon homolog	-	-	XP_020260851.1|-60.4|protein cornichon homolog 1-like isoform X2 [Asparagus officinalis]
c222997_g1	biological_process:phospholipid biosynthetic process(GO:0008654);;cellular_component:chloroplast(GO:0009507);;cellular_component:chloroplast(GO:0009507);;cellular_component:plastid(GO:0009536);;molecular_function:oxidoreductase activity(GO:0016491);;biological_process:oxidation-reduction process(GO:0055114);;molecular_function:glycerol-3-phosphate dehydrogenase [NAD+] activity(GO:0004367);;biolog…	pda:103708912|-80.9|K00006|GPD1; glycerol-3-phosphate dehydrogenase (NAD+) [EC:1.1.1.8]|ko00564|Glycerophospholipid metabolism;;	4641.GSMUA_Achr4P00150_001|-79.3|COG0240|C|glycerol-3-phosphate dehydrogenase	-	Q8H2J9|GPDA_ORYSJ|-78.9|Glycerol-3-phosphate dehydrogenase [NAD(+)], chloroplastic OS=Oryza sativa subsp. japonica GN=Os07g0229800 PE=2 SV=3	XP_008792247.1|-80.1|PREDICTED: glycerol-3-phosphate dehydrogenase [NAD(+)], chloroplastic [Phoenix dactylifera]
c205648_g1	-	-	-	-	-	WP_060977243.1|-76.9|MULTISPECIES: cytochrome c biogenesis protein CcmE [Proteobacteria]
c178312_g2	-	-	-	-	-	XP_020242332.1|-62.6|pentatricopeptide repeat-containing protein At1g11630, mitochondrial-like [Asparagus officinalis]
c231090_g7	cellular_component:integral component of membrane(GO:0016021);;molecular_function:transferase activity(GO:0016740);;molecular_function:transferase activity, transferring acyl groups(GO:0016746);;molecular_function:protein-cysteine S-palmitoyltransferase activity(GO:0019706);;cellular_component:Golgi apparatus(GO:0005794);;cellular_component:Golgi apparatus(GO:0005794);;cellular_component:membrane…	-	4081.Solyc10g018160.1.1|-70.7|COG5273|S|Zinc finger, DHHC-type containing	-	Q8VYP5|ZDH14_ARATH|-66.2|Probable protein S-acyltransferase 14 OS=Arabidopsis thaliana GN=PAT14 PE=2 SV=1	XP_020247508.1|-69.6|LOW QUALITY PROTEIN: probable protein S-acyltransferase 14 [Asparagus officinalis]
c217365_g1	-	-	29760.VIT_17s0000g06940.t01|-97.0|COG4886|S|leucine Rich Repeat	-	B9F655|PIRL7_ORYSJ|-95.7|Plant intracellular Ras-group-related LRR protein 7 OS=Oryza sativa subsp. japonica GN=IRL7 PE=2 SV=1	XP_020240786.1|-107.1|plant intracellular Ras-group-related LRR protein 7 isoform X1 [Asparagus officinalis]
c137472_g1	molecular_function:methyltransferase activity(GO:0008168);;biological_process:pantothenate biosynthetic process(GO:0015940);;biological_process:pantothenate biosynthetic process(GO:0015940);;molecular_function:transferase activity(GO:0016740);;biological_process:methylation(GO:0032259);;molecular_function:metal ion binding(GO:0046872);;molecular_function:3-methyl-2-oxobutanoate hydroxymethyltrans…	pda:103710885|-159.4|K00606|panB; 3-methyl-2-oxobutanoate hydroxymethyltransferase [EC:2.1.2.11]|ko00770|Pantothenate and CoA biosynthesis;;	3694.POPTR_0014s08620.1|-152.8|COG0413|H|Catalyzes the reversible reaction in which hydroxymethyl group from 5,10-methylenetetrahydrofolate is tranferred onto alpha-ketoisovalerate to form ketopantoate (By similarity)	PF02548.13|Pantoate_transf|2e-108|Ketopantoate hydroxymethyltransferase	O82357|PANB1_ARATH|-152.2|3-methyl-2-oxobutanoate hydroxymethyltransferase 1, mitochondrial OS=Arabidopsis thaliana GN=KPHMT1 PE=1 SV=1	XP_008795028.1|-158.7|PREDICTED: 3-methyl-2-oxobutanoate hydroxymethyltransferase 1, mitochondrial-like [Phoenix dactylifera]
c49606_g1	-	-	-	-	-	WP_066275644.1|-93.9|sensor histidine kinase [Blastomonas sp. CCH1-A6]
c217365_g2	cellular_component:membrane(GO:0016020);;cellular_component:membrane(GO:0016020);;cellular_component:integral component of membrane(GO:0016021);;molecular_function:kinase activity(GO:0016301);;biological_process:phosphorylation(GO:0016310);;molecular_function:transferase activity(GO:0016740);;molecular_function:nucleotide binding(GO:0000166);;molecular_function:protein serine/threonine kinase act…	-	4555.Si016448m|-174.0|COG0515|T|Serine Threonine protein kinase	-	Q9S9M5|WAKLA_ARATH|-97.3|Wall-associated receptor kinase-like 1 OS=Arabidopsis thaliana GN=WAKL1 PE=2 SV=1	XP_004952174.1|-171.9|PREDICTED: wall-associated receptor kinase 2-like [Setaria italica]
c89670_g1	-	-	3711.Bra008517.1-P|-93.9|ENOG410YBMU|S|receptor-like protein kinase	-	-	XP_020686577.1|-121.5|probable receptor-like protein kinase At5g24010 [Dendrobium catenatum]
c177288_g1	cellular_component:integral component of membrane(GO:0016021);;cellular_component:Golgi membrane(GO:0000139);;cellular_component:Golgi apparatus(GO:0005794);;cellular_component:membrane(GO:0016020)	-	3694.POPTR_0009s08600.1|-85.3|ENOG4111QN3|S|NA	-	Q9M2Y6|Y3972_ARATH|-79.5|Uncharacterized protein At3g49720 OS=Arabidopsis thaliana GN=At3g49720 PE=2 SV=1	XP_020251040.1|-106.0|uncharacterized protein At3g49720-like [Asparagus officinalis]
c268117_g1	-	-	-	-	-	WP_066923932.1|-95.1|hybrid sensor histidine kinase/response regulator, partial [Methylobacterium sp. CCH5-D2]
c250051_g1	-	-	29760.VIT_05s0049g00190.t01|-235.9|COG5277|Z|Actin-related protein	-	A2XQX0|ARP9_ORYSI|-211.3|Actin-related protein 9 OS=Oryza sativa subsp. indica GN=ARP9 PE=3 SV=2	XP_020261396.1|-261.8|actin-related protein 9 isoform X1 [Asparagus officinalis]
c231902_g3	biological_process:lateral root formation(GO:0010311);;molecular_function:oxidoreductase activity(GO:0016491);;biological_process:oxylipin biosynthetic process(GO:0031408);;biological_process:oxylipin biosynthetic process(GO:0031408);;molecular_function:metal ion binding(GO:0046872);;molecular_function:dioxygenase activity(GO:0051213);;biological_process:oxidation-reduction process(GO:0055114);;m…	pda:103708564|-183.7|K00454|LOX2S; lipoxygenase [EC:1.13.11.12]|ko00591|Linoleic acid metabolism;;ko00592|alpha-Linolenic acid metabolism;;	4641.GSMUA_Achr2P05850_001|-183.1|ENOG410YATF|P|Plant lipoxygenase may be involved in a number of diverse aspects of plant physiology including growth and development, pest resistance, and senescence or responses to wounding (By similarity)	PF00305.17|Lipoxygenase|1.2e-198|Lipoxygenase	Q9LUW0|LOX5_ARATH|-144.0|Linoleate 9S-lipoxygenase 5, chloroplastic OS=Arabidopsis thaliana GN=LOX5 PE=2 SV=2	XP_020088266.1|-183.1|linoleate 9S-lipoxygenase A-like isoform X1 [Ananas comosus]
c209683_g1	molecular_function:kinase activity(GO:0016301);;biological_process:phosphorylation(GO:0016310);;molecular_function:transferase activity(GO:0016740);;molecular_function:nucleotide binding(GO:0000166);;molecular_function:protein serine/threonine kinase activity(GO:0004674);;molecular_function:ATP binding(GO:0005524)	-	3694.POPTR_0006s27940.1|-168.1|COG0515|T|Serine Threonine protein kinase	PF00069.23|Pkinase|2.6e-75|Protein kinase domain	Q8W1D5|CIPKP_ARATH|-157.4|CBL-interacting serine/threonine-protein kinase 25 OS=Arabidopsis thaliana GN=CIPK25 PE=2 SV=1	OAY27478.1|-168.1|hypothetical protein MANES_16G128800 [Manihot esculenta]
c157745_g1	-	-	-	-	-	WP_082751243.1|-50.6|hypothetical protein [Blastomonas sp. CCH1-A6]
c24103_g1	-	-	-	-	-	EUM86452.1|-50.0|hypothetical protein L351_09192 [Enterobacter sp. MGH 5]
c169462_g1	-	-	4081.Solyc05g012590.2.1|-90.2|COG0666|S|Ankyrin Repeat	-	-	XP_020276320.1|-100.9|26S proteasome non-ATPase regulatory subunit 10 [Asparagus officinalis]
c230734_g1	-	egu:105043649|-10000.0|K12604|CNOT1, NOT1; CCR4-NOT transcription complex subunit 1|ko03018|RNA degradation;;	29760.VIT_00s0144g00010.t01|-303.0|COG5103|K|Ccr4-NOT transcription complex, subunit	PF04054.13|Not1|4.9e-151|CCR4-Not complex component, Not1	-	XP_008802814.1|-10000.0|PREDICTED: CCR4-NOT transcription complex subunit 1-like isoform X2 [Phoenix dactylifera]
c197891_g2	-	-	-	-	-	XP_020246116.1|-81.6|basic leucine zipper 34 isoform X2 [Asparagus officinalis]
c227133_g4	-	-	4641.GSMUA_Achr8P02890_001|-129.1|ENOG4111SG7|S|Protein of unknown function (DUF616)	PF04765.11|DUF616|2.4e-77|Protein of unknown function (DUF616)	-	XP_008808902.1|-129.9|PREDICTED: uncharacterized protein LOC103720789 [Phoenix dactylifera]
c230878_g2	cellular_component:nucleus(GO:0005634);;cellular_component:cytoplasm(GO:0005737);;cellular_component:cytosol(GO:0005829);;biological_process:cellular response to heat(GO:0034605);;molecular_function:nucleotide binding(GO:0000166);;molecular_function:ATP binding(GO:0005524);;cellular_component:nucleus(GO:0005634)	-	4641.GSMUA_Achr1P13710_001|-206.7|COG0542|O|ATP-dependent CLP protease ATP-binding subunit	-	Q6F2Y7|CLPB1_ORYSJ|-205.8|Chaperone protein ClpB1 OS=Oryza sativa subsp. japonica GN=CLPB1 PE=2 SV=1	ONK70053.1|-218.0|uncharacterized protein A4U43_C05F29760 [Asparagus officinalis]
c253531_g1	-	-	-	-	-	WP_048465614.1|-70.3|hybrid sensor histidine kinase/response regulator [Methylobacterium aquaticum]
c207878_g1	cellular_component:membrane(GO:0016020);;cellular_component:membrane(GO:0016020);;cellular_component:integral component of membrane(GO:0016021)	-	39947.LOC_Os03g10680.1|-195.5|ENOG410XQR0|S|inverted formin, FH2 and WH2 domain containing	PF02181.21|FH2|1.1e-117|Formin Homology 2 Domain	Q10Q99|FH8_ORYSJ|-193.8|Formin-like protein 8 OS=Oryza sativa subsp. japonica GN=FH8 PE=2 SV=1	XP_020244009.1|-193.3|formin-like protein 8 [Asparagus officinalis]
c127985_g1	molecular_function:ATP binding(GO:0005524);;cellular_component:nucleus(GO:0005634);;cellular_component:nucleus(GO:0005634);;biological_process:DNA repair(GO:0006281);;biological_process:cellular response to DNA damage stimulus(GO:0006974);;molecular_function:nucleotide binding(GO:0000166);;molecular_function:DNA binding(GO:0003677);;molecular_function:protein binding(GO:0005515)	tcc:TCM_015154|-173.3|K08736|MSH3; DNA mismatch repair protein MSH3|ko03430|Mismatch repair;;	4641.GSMUA_AchrUn_randomP05200_001|-117.1|COG0249|L|that it carries out the mismatch recognition step. This protein has a weak ATPase activity (By similarity)	-	O65607|MSH3_ARATH|-212.1|DNA mismatch repair protein MSH3 OS=Arabidopsis thaliana GN=MSH3 PE=1 SV=2	ONK79683.1|-262.4|uncharacterized protein A4U43_C01F8980 [Asparagus officinalis]
c265392_g1	-	-	-	-	-	WP_053622085.1|-50.4|Tn3 family transposase [Asanoa ferruginea]
c200830_g1	biological_process:regulation of transcription, DNA-templated(GO:0006355);;molecular_function:metal ion binding(GO:0046872);;cellular_component:nucleus(GO:0005634);;cellular_component:nucleus(GO:0005634);;biological_process:transcription, DNA-templated(GO:0006351)	-	4641.GSMUA_Achr5P01170_001|-129.8|COG5048|S|Zinc finger protein	-	Q943I6|STOP1_ORYSJ|-133.5|Zinc finger protein STOP1 homolog OS=Oryza sativa subsp. japonica GN=Os01g0871200 PE=2 SV=1	XP_020246003.1|-149.7|zinc finger protein STOP1 homolog [Asparagus officinalis]
c200974_g1	cellular_component:chloroplast(GO:0009507);;cellular_component:plastid(GO:0009536);;molecular_function:rRNA binding(GO:0019843);;cellular_component:intracellular ribonucleoprotein complex(GO:0030529);;biological_process:response to antibiotic(GO:0046677);;molecular_function:RNA binding(GO:0003723);;cellular_component:ribosome(GO:0005840);;cellular_component:chloroplast(GO:0009507)	mus:103985246|-117.6|K02988|RP-S5, MRPS5, rpsE; small subunit ribosomal protein S5|ko03010|Ribosome;;	4641.GSMUA_Achr5P17450_001|-118.8|COG0098|J|Located at the back of the 30S subunit body where it stabilizes the conformation of the head with respect to the body (By similarity)	-	Q9ST69|RR5_SPIOL|-103.8|30S ribosomal protein S5, chloroplastic OS=Spinacia oleracea GN=rps5 PE=1 SV=1	XP_009401167.1|-116.8|PREDICTED: 30S ribosomal protein S5, chloroplastic [Musa acuminata subsp. malaccensis]
c195942_g1	-	-	4641.GSMUA_Achr5P21470_001|-197.5|ENOG410XTFH|S|Exostosin	PF03016.13|Exostosin|1.1e-77|Exostosin family	-	XP_020254270.1|-215.2|probable arabinosyltransferase ARAD1 [Asparagus officinalis]
c218814_g2	cellular_component:plastid(GO:0009536);;molecular_function:isomerase activity(GO:0016853);;molecular_function:RNA binding(GO:0003723);;cellular_component:chloroplast(GO:0009507);;cellular_component:chloroplast(GO:0009507)	-	4641.GSMUA_Achr8P29630_001|-103.4|COG0564|J|pseudouridine synthase activity	-	A3BN26|PUS6_ORYSJ|-100.4|RNA pseudouridine synthase 6, chloroplastic OS=Oryza sativa subsp. japonica GN=Os07g0660400 PE=2 SV=1	XP_020107848.1|-104.6|RNA pseudouridine synthase 6, chloroplastic [Ananas comosus]
c213529_g4	biological_process:response to absence of light(GO:0009646);;biological_process:response to absence of light(GO:0009646);;biological_process:response to sucrose(GO:0009744);;biological_process:response to sucrose(GO:0009744);;biological_process:response to zinc ion(GO:0010043);;molecular_function:isomerase activity(GO:0016853);;biological_process:response to L-ascorbic acid(GO:0033591);;biologica…	egu:105055924|-10000.0|K14544|UTP22, NOL6; U3 small nucleolar RNA-associated protein 22|ko03008|Ribosome biogenesis in eukaryotes;;	4555.Si009232m|-10000.0|ENOG410XPP9|S|Nucleolar protein	PF03813.12|Nrap|4.7e-252|Nrap protein	Q9FZH5|MPI2_ARATH|-129.6|Mannose-6-phosphate isomerase 2 OS=Arabidopsis thaliana GN=PMI2 PE=1 SV=1	XP_010936257.1|-10000.0|PREDICTED: nucleolar protein 6 [Elaeis guineensis]
c115593_g1	cellular_component:mitochondrion(GO:0005739);;biological_process:transcription, DNA-templated(GO:0006351);;biological_process:DNA-templated transcription, termination(GO:0006353);;biological_process:regulation of transcription, DNA-templated(GO:0006355);;molecular_function:RNA binding(GO:0003723);;cellular_component:mitochondrion(GO:0005739);;cellular_component:mitochondrion(GO:0005739)	-	3702.AT1G74120.1|-92.3|ENOG410XT49|S|mitochondrial transcription termination	-	Q9C6A1|MTEFE_ARATH|-93.6|Transcription termination factor MTERF15, mitochondrial OS=Arabidopsis thaliana GN=MTERF15 PE=2 SV=1	XP_020268706.1|-135.0|transcription termination factor MTERF15, mitochondrial [Asparagus officinalis]
c224078_g1	cellular_component:membrane(GO:0016020);;cellular_component:integral component of membrane(GO:0016021);;cellular_component:chloroplast membrane(GO:0031969);;biological_process:multicellular organism development(GO:0007275);;cellular_component:chloroplast(GO:0009507);;cellular_component:plastid(GO:0009536)	-	3711.Bra029704.1-P|-74.7|ENOG4111GA1|S|Domain of unknown function (DUF3411)	-	Q9C9Z2|RER3_ARATH|-74.7|Protein RETICULATA-RELATED 3, chloroplastic OS=Arabidopsis thaliana GN=RER3 PE=1 SV=1	EPS58690.1|-78.8|hypothetical protein M569_16122, partial [Genlisea aurea]
c218814_g5	-	-	-	-	-	XP_010274374.1|-51.0|PREDICTED: uncharacterized protein LOC104609701 [Nelumbo nucifera]
c275160_g1	-	-	-	-	-	WP_060978323.1|-72.8|MULTISPECIES: long-chain fatty acid--CoA ligase [Proteobacteria]
c229363_g1	-	-	4641.GSMUA_Achr10P06890_001|-60.2|ENOG410YH6H|S|GEM-like protein	-	-	XP_020242015.1|-71.5|putative GEM-like protein 8 [Asparagus officinalis]
c218814_g6	-	-	4113.PGSC0003DMT400074639|-56.9|COG2801|L|Retrotransposon protein	-	-	XP_010683397.1|-82.2|PREDICTED: uncharacterized protein LOC104898087 [Beta vulgaris subsp. vulgaris]
c155121_g2	biological_process:metabolic process(GO:0008152);;cellular_component:membrane(GO:0016020);;molecular_function:hydrolase activity(GO:0016787);;molecular_function:hydrolase activity, acting on glycosyl bonds(GO:0016798);;cellular_component:anchored component of membrane(GO:0031225);;molecular_function:glucan endo-1,3-beta-D-glucosidase activity(GO:0042973);;cellular_component:plasma membrane(GO:000…	egu:105048501|-203.2|K19891|GN1_2_3; glucan endo-1,3-beta-glucosidase 1/2/3 [EC:3.2.1.39]|ko00500|Starch and sucrose metabolism;;	29760.VIT_01s0011g05500.t01|-199.8|ENOG410ZF4V|G|glucan endo-1-3-beta-glucosidase	PF00332.16|Glyco_hydro_17|5.5e-76|Glycosyl hydrolases family 17	Q9ZU91|E133_ARATH|-173.2|Glucan endo-1,3-beta-glucosidase 3 OS=Arabidopsis thaliana GN=At2g01630 PE=1 SV=2	XP_020257164.1|-213.0|glucan endo-1,3-beta-glucosidase 3-like [Asparagus officinalis]
c204617_g1	-	-	-	-	-	WP_060977206.1|-129.1|MULTISPECIES: DUF885 domain-containing protein [Proteobacteria]
c211049_g2	molecular_function:polyribonucleotide nucleotidyltransferase activity(GO:0004654);;cellular_component:mitochondrion(GO:0005739);;cellular_component:mitochondrion(GO:0005739);;biological_process:rRNA processing(GO:0006364);;biological_process:mRNA processing(GO:0006397);;biological_process:tRNA processing(GO:0008033);;molecular_function:transferase activity(GO:0016740);;molecular_function:nucleoti…	egu:105058802|-10000.0|K00962|pnp, PNPT1; polyribonucleotide nucleotidyltransferase [EC:2.7.7.8]|ko00230|Purine metabolism;;ko00240|Pyrimidine metabolism;;ko03018|RNA degradation;;	4113.PGSC0003DMT400001389|-10000.0|COG1185|J|Involved in mRNA degradation. Hydrolyzes single-stranded polyribonucleotides processively in the 3'- to 5'-direction (By similarity)	-	Q6KAI0|PNP2_ORYSJ|-10000.0|Polyribonucleotide nucleotidyltransferase 2, mitochondrial OS=Oryza sativa subsp. japonica GN=PNP2 PE=2 SV=1	XP_010940149.1|-10000.0|PREDICTED: polyribonucleotide nucleotidyltransferase 2, mitochondrial isoform X1 [Elaeis guineensis]
c188649_g1	cellular_component:plastid inner membrane(GO:0009528);;cellular_component:plastid(GO:0009536);;cellular_component:chloroplast inner membrane(GO:0009706);;biological_process:protein transport(GO:0015031);;cellular_component:membrane(GO:0016020);;molecular_function:oxidoreductase activity(GO:0016491);;biological_process:oxidation-reduction process(GO:0055114);;molecular_function:calmodulin binding(…	-	4641.GSMUA_Achr8P20890_001|-143.0|COG1028|S|Dehydrogenase reductase	-	Q6RVV4|TIC32_PEA|-102.1|Short-chain dehydrogenase TIC 32, chloroplastic OS=Pisum sativum GN=TIC32 PE=1 SV=1	XP_020275587.1|-152.0|short-chain dehydrogenase TIC 32, chloroplastic [Asparagus officinalis]
c204617_g2	-	-	-	-	-	WP_060977206.1|-56.5|MULTISPECIES: DUF885 domain-containing protein [Proteobacteria]
c188505_g2	-	-	384765.SIAM614_25407|-60.6|COG1217|T|gtp-binding protein typa	-	-	WP_060979737.1|-106.6|MULTISPECIES: translational GTPase TypA [Proteobacteria]
c49356_g1	-	-	-	-	-	WP_064526340.1|-56.5|acyl-CoA synthetase [Achromobacter xylosoxidans]
c76922_g2	-	-	-	-	-	WP_081096848.1|-73.3|MULTISPECIES: hypothetical protein [Sphingomonadales]
c181889_g3	-	-	-	-	-	WP_060977905.1|-50.6|MULTISPECIES: hypothetical protein [Proteobacteria]
c112394_g1	-	-	-	-	-	WP_066278220.1|-56.7|RNA degradosome polyphosphate kinase [Blastomonas sp. CCH1-A6]
c228195_g2	cellular_component:integral component of membrane(GO:0016021);;molecular_function:transferase activity(GO:0016740);;molecular_function:transferase activity, transferring acyl groups(GO:0016746);;molecular_function:protein-cysteine S-palmitoyltransferase activity(GO:0019706);;cellular_component:Golgi membrane(GO:0000139);;cellular_component:Golgi apparatus(GO:0005794);;cellular_component:membrane(…	-	4641.GSMUA_Achr3P30600_001|-208.9|COG5273|S|Zinc finger, DHHC-type containing	-	Q3EC11|ZDHC2_ARATH|-178.1|Probable protein S-acyltransferase 23 OS=Arabidopsis thaliana GN=PAT23 PE=2 SV=2	XP_020257863.1|-221.1|LOW QUALITY PROTEIN: probable protein S-acyltransferase 23 [Asparagus officinalis]
c187337_g1	cellular_component:plastid(GO:0009536);;molecular_function:oxidoreductase activity(GO:0016491);;biological_process:oxidation-reduction process(GO:0055114);;molecular_function:glutathione-disulfide reductase activity(GO:0004362);;cellular_component:chloroplast(GO:0009507);;cellular_component:chloroplast(GO:0009507)	egu:105053424|-247.4|K00383|GSR, gor; glutathione reductase (NADPH) [EC:1.8.1.7]|ko00480|Glutathione metabolism;;	4641.GSMUA_Achr3P29340_001|-238.3|COG1249|C|dihydrolipoyl dehydrogenase	PF07992.12|Pyr_redox_2|1.3e-63|Pyridine nucleotide-disulphide oxidoreductase	P80461|GSHRP_TOBAC|-234.5|Glutathione reductase, chloroplastic (Fragment) OS=Nicotiana tabacum GN=GOR PE=1 SV=1	XP_010932864.1|-246.6|PREDICTED: glutathione reductase, chloroplastic isoform X1 [Elaeis guineensis]
c322707_g1	-	-	-	-	-	WP_066926490.1|-85.5|hypothetical protein [Methylobacterium sp. CCH5-D2]
c203223_g2	molecular_function:protein geranylgeranyltransferase activity(GO:0004661);;molecular_function:CAAX-protein geranylgeranyltransferase activity(GO:0004662);;molecular_function:transferase activity(GO:0016740);;biological_process:protein farnesylation(GO:0018343);;molecular_function:prenyltransferase activity(GO:0004659);;molecular_function:protein farnesyltransferase activity(GO:0004660);;molecular…	egu:105038116|-134.3|K05955|FNTA; protein farnesyltransferase/geranylgeranyltransferase type-1 subunit alpha [EC:2.5.1.58 2.5.1.59]|ko00900|Terpenoid backbone biosynthesis;;	39947.LOC_Os09g33930.1|-129.3|COG5536|O|(alpha) subunit	-	Q9LX33|FNTA_ARATH|-121.0|Protein farnesyltransferase/geranylgeranyltransferase type-1 subunit alpha OS=Arabidopsis thaliana GN=FTA PE=1 SV=2	OAY81554.1|-133.8|Protein farnesyltransferase/geranylgeranyltransferase type-1 subunit alpha [Ananas comosus]
c118068_g1	-	-	-	-	-	OHC97294.1|-121.1|amidohydrolase [Sphingomonadales bacterium RIFCSPHIGHO2_01_FULL_65_20]
c198417_g2	biological_process:ethylene-activated signaling pathway(GO:0009873);;biological_process:response to nitrate(GO:0010167);;molecular_function:chitinase activity(GO:0004568);;cellular_component:extracellular region(GO:0005576);;cellular_component:extracellular region(GO:0005576);;biological_process:multicellular organism development(GO:0007275)	-	4641.GSMUA_Achr6P36390_001|-102.6|COG3979|G|chitinase	-	Q9MA41|CTL1_ARATH|-99.4|Chitinase-like protein 1 OS=Arabidopsis thaliana GN=CTL1 PE=1 SV=1	XP_020672809.1|-107.2|chitinase-like protein 1 [Dendrobium catenatum]
c203223_g3	biological_process:fruit ripening(GO:0009835);;cellular_component:membrane(GO:0016020);;cellular_component:integral component of membrane(GO:0016021);;molecular_function:oxidoreductase activity(GO:0016491);;cellular_component:organelle membrane(GO:0031090);;cellular_component:intracellular membrane-bounded organelle(GO:0043231);;molecular_function:metal ion binding(GO:0046872);;biological_process…	-	59689.fgenesh1_pm.C_scaffold_8001367|-116.6|COG2124|Q|Cytochrome p450	PF00067.20|p450|2.9e-93|Cytochrome P450	P24465|C71A1_PERAE|-124.0|Cytochrome P450 71A1 OS=Persea americana GN=CYP71A1 PE=1 SV=2	XP_020264444.1|-153.3|cytochrome P450 71A9-like [Asparagus officinalis]
c219732_g1	cellular_component:mitochondrion(GO:0005739);;cellular_component:mitochondrial matrix(GO:0005759);;biological_process:proteolysis(GO:0006508);;molecular_function:peptidase activity(GO:0008233);;molecular_function:serine-type peptidase activity(GO:0008236);;molecular_function:hydrolase activity(GO:0016787);;molecular_function:nucleotide binding(GO:0000166);;molecular_function:DNA binding(GO:000367…	-	29760.VIT_14s0060g01230.t01|-10000.0|COG0466|O|ATP-dependent serine protease that mediates the selective degradation of mutant and abnormal proteins as well as certain short-lived regulatory proteins. Required for cellular homeostasis and for survival from DNA damage and developmental changes induced by stress. Degrades polypeptides processively to yield small peptide fragments that are 5 to 10 a…	PF05362.11|Lon_C|2.7e-77|Lon protease (S16) C-terminal proteolytic domain	A2YQ56|LONM_ORYSI|-10000.0|Lon protease homolog, mitochondrial OS=Oryza sativa subsp. indica GN=OsI_27415 PE=2 SV=1	XP_015870637.1|-10000.0|PREDICTED: lon protease homolog 1, mitochondrial-like [Ziziphus jujuba]
c219876_g1	biological_process:regulation of cell shape(GO:0008360);;cellular_component:membrane(GO:0016020);;cellular_component:integral component of membrane(GO:0016021);;molecular_function:transferase activity(GO:0016740);;molecular_function:transferase activity, transferring glycosyl groups(GO:0016757);;biological_process:cell wall organization(GO:0071555);;molecular_function:1,3-beta-D-glucan synthase a…	-	3694.POPTR_0002s05970.1|-10000.0|ENOG410XQ8V|S|synthase	PF02364.13|Glucan_synthase|9.1e-243|1,3-beta-glucan synthase component	Q9SHJ3|CALS7_ARATH|-10000.0|Callose synthase 7 OS=Arabidopsis thaliana GN=CALS7 PE=3 SV=3	XP_006417911.1|-10000.0|hypothetical protein EUTSA_v10006529mg [Eutrema salsugineum]
c167938_g1	-	-	-	-	-	WP_067512998.1|-58.5|MULTISPECIES: DUF885 domain-containing protein [Proteobacteria]
c185306_g1	-	-	29760.VIT_14s0060g00200.t01|-146.8|ENOG410Z7Z7|S|Pentatricopeptide repeat-containing protein	-	Q9LXY5|PP284_ARATH|-145.5|Pentatricopeptide repeat-containing protein At3g56550 OS=Arabidopsis thaliana GN=PCMP-H80 PE=2 SV=1	ONK61419.1|-171.8|uncharacterized protein A4U43_C08F29710 [Asparagus officinalis]
c202199_g1	cellular_component:chloroplast stroma(GO:0009570);;biological_process:response to toxic substance(GO:0009636);;molecular_function:transferase activity(GO:0016740);;molecular_function:glutathione transferase activity(GO:0004364);;cellular_component:chloroplast(GO:0009507);;cellular_component:plastid(GO:0009536)	-	3694.POPTR_0005s14550.1|-85.6|ENOG410ZRK6|U|Chloride intracellular channel	-	Q8LE52|DHAR3_ARATH|-83.9|Glutathione S-transferase DHAR3, chloroplastic OS=Arabidopsis thaliana GN=DHAR3 PE=1 SV=1	XP_020243485.1|-85.4|glutathione S-transferase DHAR3, chloroplastic-like [Asparagus officinalis]
c201418_g2	-	-	-	-	-	XP_020273439.1|-58.0|protein REVEILLE 2-like [Asparagus officinalis]
c213279_g1	-	-	29760.VIT_02s0241g00050.t01|-263.0|ENOG4110UCC|S|NA	-	-	OVA07676.1|-267.5|hypothetical protein BVC80_1827g32 [Macleaya cordata]
[truncated: 19,180 more rows]
