# Supplementary material for: Comparative Transcriptome Analysis of Temperature-Induced Green Discoloration in Garlic
Source: Int J Genomics. 2018 Dec 2;2018:6725728. doi: 10.1155/2018/6725728 (PMC6304921; doi:10.1155/2018/6725728)
Supplement: Supplementary Materials — Supplementary data to this article can be found online and in Data Availability. 332 Supplementary Table S1: qRT-PCR primers of selected unigenes. 333 Supplementary Table S2: summary of transcriptome sequencing. 334 Supplementary Table S3: the function of unigenes annotated. 335 Supplementary Table S4: DEGs identified in three treatments. 336 Supplementary Table S5: GO terms enriched by DEGs. [file 6725728.f1.zip › Table S4-DEGs identified in three treatments.xlsx]

## Sheet: Sheet1
		DS1				DS2				DS3				function annotated
ID	Group	log2FC	p value	q value	Direction of regulation	log2FC	p value	q value	Direction of regulation	log2FC	p value	q value	Direction of regulation	GO	KEGG.id|logEvalue|KO|KO.def|ko|ko.defLine	eggNOG.id|logEvalue|Orthologous|FunCat|description	Pfam.acc|hmm.name|Evalue|description	SwissProt.entry|name|logEvalue|description	NR.acc|logEvalue|des
c204006_g1	cluster 6	-	-	-	-	-	-	-	-	2.13233	0.00247929	0.0369026	up	-	-	-	-	-	-
c221387_g1	cluster 6	-1.42357	4.35109e-05	0.00343346	down	-	-	-	-	1.62976	2.21236e-05	0.0148391	up	molecular_function:alliin lyase activity(GO:0047654);;cellular_component:vacuole(GO:0005773);;cellular_component:vacuole(GO:0005773);;molecular_function:lyase activity(GO:0016829)	-	29760.VIT_18s0157g00140.t01|-121.1|ENOG410XS9Z|S|tryptophan aminotransferase-related protein 4-like	PF04864.11|Alliinase_C|7.2e-173|Allinase	Q01594|ALLN1_ALLSA|-289.3|Alliin lyase 1 OS=Allium sativum PE=1 SV=1	Q01594.1|-286.0|RecName: Full=Alliin lyase 1; Short=Alliinase-1; AltName: Full=Cysteine sulphoxide lyase 1; Flags: Precursor
c214189_g1	cluster 1	2.54824	0.00071748	0.00735998	up	2.61514	5.55344e-06	0.0031615	up	4.20772	2.09751e-05	0.0145769	up	molecular_function:photoreceptor activity(GO:0009881);;molecular_function:blue light photoreceptor activity(GO:0009882);;molecular_function:kinase activity(GO:0016301);;biological_process:phosphorylation(GO:0016310);;molecular_function:transferase activity(GO:0016740);;biological_process:protein-chromophore linkage(GO:0018298);;biological_process:response to stimulus(GO:0050896);;molecular_functi…	-	4641.GSMUA_Achr7P10360_001|-10000.0|COG2202|T|Histidine kinase	PF00069.23|Pkinase|3.2e-63|Protein kinase domain	Q2QYY8|PHT1A_ORYSJ|-10000.0|Phototropin-1A OS=Oryza sativa subsp. japonica GN=PHOT1A PE=1 SV=2	XP_010922472.1|-10000.0|PREDICTED: phototropin-1A isoform X2 [Elaeis guineensis]
c218664_g1	cluster 6	-3.17093	0.000169225	0.00426375	down	-2.02882	0.000574825	0.00771561	down	-	-	-	-	-	-	-	-	-	-
c223547_g2	cluster 6	-1.02141	0.0159389	0.0445677	down	-	-	-	-	1.05977	0.00131748	0.0299606	up	-	-	4577.GRMZM2G022298_P01|-205.7|ENOG410XQ54|S|F-box and leucine-rich repeat protein	-	Q8RWU5|FBL3_ARATH|-123.9|F-box/LRR-repeat protein 3 OS=Arabidopsis thaliana GN=FBL3 PE=2 SV=1	OAY70386.1|-211.7|F-box/LRR-repeat protein 3 [Ananas comosus]
c225266_g1	cluster 2	3.8821	8.17193e-05	0.00370221	up	3.42569	0.000131895	0.00503206	up	2.13392	0.000734753	0.0254521	up	-	-	-	-	-	-
c231505_g1	cluster 2	2.66756	0.000842737	0.00789648	up	2.56442	0.000193575	0.00548387	up	1.27335	0.00138134	0.0304372	up	biological_process:metabolic process(GO:0008152);;molecular_function:glucose-1-phosphate adenylyltransferase activity(GO:0008878);;cellular_component:chloroplast(GO:0009507);;cellular_component:chloroplast(GO:0009507);;cellular_component:plastid(GO:0009536);;molecular_function:transferase activity(GO:0016740);;molecular_function:nucleotidyltransferase activity(GO:0016779);;biological_process:star…	mtr:MTR_3g082150|-86.2|K00975|glgC; glucose-1-phosphate adenylyltransferase [EC:2.7.7.27]|ko00520|Amino sugar and nucleotide sugar metabolism;;ko00500|Starch and sucrose metabolism;;	3694.POPTR_0014s16990.1|-85.2|COG0448|G|Catalyzes the synthesis of ADP-glucose, a sugar donor used in elongation reactions on alpha-glucans (By similarity)	-	P52417|GLGS2_VICFA|-87.1|Glucose-1-phosphate adenylyltransferase small subunit 2, chloroplastic OS=Vicia faba GN=AGPP PE=2 SV=1	AHN15416.1|-87.0|AGPS1 [Gladiolus hybrid cultivar]
c228903_g3	cluster 2	-	-	-	-	-	-	-	-	-	-	-	-	molecular_function:kinase activity(GO:0016301);;biological_process:phosphorylation(GO:0016310);;molecular_function:transferase activity(GO:0016740);;molecular_function:nucleotide binding(GO:0000166);;molecular_function:protein serine/threonine kinase activity(GO:0004674);;molecular_function:ATP binding(GO:0005524)	-	4641.GSMUA_Achr5P10310_001|-200.3|COG0515|T|Serine Threonine protein kinase	PF00069.23|Pkinase|2.9e-76|Protein kinase domain	Q10SC8|CIPK9_ORYSJ|-192.4|CBL-interacting protein kinase 9 OS=Oryza sativa subsp. japonica GN=CIPK9 PE=2 SV=1	XP_020261745.1|-209.4|CBL-interacting protein kinase 9-like isoform X1 [Asparagus officinalis]
c249921_g1	cluster 2	3.5157	0.000714703	0.00734618	up	3.0192	1.59338e-05	0.00363332	up	1.63425	2.38414e-05	0.0153434	up	biological_process:cell cycle(GO:0007049);;molecular_function:lipid binding(GO:0008289);;cellular_component:membrane(GO:0016020);;cellular_component:membrane(GO:0016020);;biological_process:cell division(GO:0051301);;cellular_component:cytoplasm(GO:0005737);;cellular_component:cytoplasm(GO:0005737);;biological_process:transport(GO:0006810)	-	4081.Solyc09g015080.2.1|-162.1|ENOG410XRSQ|S|Transfer protein	-	Q9SCU1|PATL6_ARATH|-153.6|Patellin-6 OS=Arabidopsis thaliana GN=PATL6 PE=2 SV=1	XP_010937963.1|-169.1|PREDICTED: patellin-6 [Elaeis guineensis]
c168397_g1	cluster 2	3.00249	0.0014028	0.0100833	up	2.36123	0.00522699	0.0224671	up	-	-	-	-	-	-	-	-	-	ACT22759.1|-177.1|CONSTANS-like protein [Allium cepa]
c75070_g1	cluster 2	4.60097	9.13691e-05	0.00380919	up	3.26735	0.000175254	0.00535848	up	1.49218	0.00220338	0.0353516	up	cellular_component:membrane(GO:0016020);;cellular_component:integral component of membrane(GO:0016021);;cellular_component:plasma membrane(GO:0005886);;cellular_component:plasma membrane(GO:0005886);;biological_process:transport(GO:0006810)	-	39947.LOC_Os03g48180.1|-206.7|COG3104|E|transporter	PF00854.19|PTR2|9e-83|POT family	Q944G5|PTR44_ARATH|-182.8|Protein NRT1/ PTR FAMILY 2.10 OS=Arabidopsis thaliana GN=NPF2.10 PE=1 SV=3	XP_010923296.1|-219.9|PREDICTED: protein NRT1/ PTR FAMILY 2.11-like isoform X2 [Elaeis guineensis]
c210319_g2	cluster 1	4.34918	2.47089e-06	0.00222763	up	4.085	1.11742e-06	0.00182165	up	2.28774	0.000105563	0.0192641	up	molecular_function:hydrolase activity(GO:0016787);;biological_process:cell wall organization(GO:0071555);;cellular_component:extracellular region(GO:0005576);;cellular_component:cell wall(GO:0005618);;cellular_component:cell wall(GO:0005618)	-	4641.GSMUA_Achr2P18450_001|-129.9|ENOG410XQKD|S|pectinacetylesterase	PF03283.11|PAE|5.7e-121|Pectinacetylesterase	Q66GM8|PAE10_ARATH|-120.9|Pectin acetylesterase 10 OS=Arabidopsis thaliana GN=PAE10 PE=2 SV=1	ONK61424.1|-136.8|uncharacterized protein A4U43_C08F29760 [Asparagus officinalis]
c224668_g1	cluster 1	6.23385	0.000345787	0.00541458	up	5.65735	3.39869e-06	0.00301884	up	3.77909	1.29851e-05	0.0138245	up	molecular_function:peptidase activity(GO:0008233);;molecular_function:cysteine-type peptidase activity(GO:0008234);;molecular_function:hydrolase activity(GO:0016787);;cellular_component:endoplasmic reticulum(GO:0005783);;cellular_component:endoplasmic reticulum lumen(GO:0005788);;biological_process:proteolysis(GO:0006508)	-	4577.GRMZM2G456217_P01|-53.6|COG4870|O|cathepsin	-	P43156|CYSP_HEMSP|-60.5|Thiol protease SEN102 OS=Hemerocallis sp. GN=SEN102 PE=2 SV=1	P43156.1|-57.2|RecName: Full=Thiol protease SEN102; Flags: Precursor
c176603_g1	cluster 2	1.71931	0.00044691	0.00606279	up	1.62353	0.00074293	0.00844003	up	-	-	-	-	cellular_component:cell wall(GO:0005618);;biological_process:metabolic process(GO:0008152);;molecular_function:hydrolase activity(GO:0016787);;molecular_function:hydrolase activity, acting on glycosyl bonds(GO:0016798);;molecular_function:glucan endo-1,3-beta-D-glucosidase activity(GO:0042973);;biological_process:cell wall organization(GO:0071555);;cellular_component:extracellular region(GO:00055…	-	4641.GSMUA_Achr6P31650_001|-129.4|ENOG410YAGI|G|glucan endo-1,3-beta-glucosidase	PF00332.16|Glyco_hydro_17|1.4e-84|Glycosyl hydrolases family 17	Q9M069|E137_ARATH|-122.3|Glucan endo-1,3-beta-glucosidase 7 OS=Arabidopsis thaliana GN=At4g34480 PE=1 SV=2	XP_007017514.2|-131.6|PREDICTED: glucan endo-1,3-beta-glucosidase 7 [Theobroma cacao]
c197193_g2	cluster 2	4.45602	7.68134e-05	0.0036699	up	3.41151	0.000212901	0.00564354	up	1.40829	0.0034726	0.0420307	up	cellular_component:cytoplasm(GO:0005737);;biological_process:defense response(GO:0006952);;molecular_function:ligase activity(GO:0016874);;molecular_function:oxalate-CoA ligase activity(GO:0050203);;molecular_function:nucleotide binding(GO:0000166);;molecular_function:ATP binding(GO:0005524);;cellular_component:cytoplasm(GO:0005737)	-	3694.POPTR_0015s13060.1|-214.9|COG0318|IQ|Amp-dependent synthetase and ligase	PF00501.26|AMP-binding|1.9e-89|AMP-binding enzyme	Q9SMT7|4CLLA_ARATH|-206.7|Oxalate--CoA ligase OS=Arabidopsis thaliana GN=AAE3 PE=1 SV=1	AIY34664.1|-226.0|4-coumarate:CoA ligase-like protein [Ornithogalum longebracteatum]
c215382_g1	cluster 1	6.68637	0.000700454	0.00727737	up	6.68318	1.93041e-05	0.00368229	up	4.55388	1.84613e-05	0.0140446	up	molecular_function:metal ion binding(GO:0046872);;molecular_function:lyase activity(GO:0016829);;molecular_function:pectate lyase activity(GO:0030570);;biological_process:pectin catabolic process(GO:0045490)	pda:103717735|-198.5|K01728|pel; pectate lyase [EC:4.2.2.2]|ko00040|Pentose and glucuronate interconversions;;	4533.OB04G11440.1|-191.3|COG3866|G|pectate lyase activity	-	Q944R1|PLY15_ARATH|-185.3|Probable pectate lyase 15 OS=Arabidopsis thaliana GN=At4g13710 PE=2 SV=1	XP_008804449.1|-197.7|PREDICTED: probable pectate lyase 8 isoform X1 [Phoenix dactylifera]
c33919_g1	cluster 2	4.45338	7.151e-06	0.00256158	up	3.01795	0.000295797	0.00628855	up	-	-	-	-	molecular_function:oxidoreductase activity(GO:0016491);;biological_process:oxidation-reduction process(GO:0055114);;molecular_function:aldehyde dehydrogenase (NAD) activity(GO:0004029);;cellular_component:cytoplasm(GO:0005737);;cellular_component:cytosol(GO:0005829)	egu:105048589|-236.8|K12355|REF1; coniferyl-aldehyde dehydrogenase [EC:1.2.1.68]|ko00940|Phenylpropanoid biosynthesis;;	4538.ORGLA01G0169500.1|-232.2|COG1012|C|Dehydrogenase	PF00171.20|Aldedh|1.3e-180|Aldehyde dehydrogenase family	Q56YU0|AL2C4_ARATH|-211.7|Aldehyde dehydrogenase family 2 member C4 OS=Arabidopsis thaliana GN=ALDH2C4 PE=1 SV=2	XP_020241182.1|-247.8|aldehyde dehydrogenase family 2 member C4-like [Asparagus officinalis]
c204933_g1	cluster 2	1.73741	0.00431532	0.0189628	up	1.31825	0.0148721	0.0435573	up	-	-	-	-	biological_process:proteolysis(GO:0006508);;molecular_function:peptidase activity(GO:0008233);;molecular_function:hydrolase activity(GO:0016787);;cellular_component:apoplast(GO:0048046);;cellular_component:apoplast(GO:0048046);;molecular_function:nucleotide binding(GO:0000166);;molecular_function:aspartic-type endopeptidase activity(GO:0004190);;cellular_component:extracellular region(GO:0005576)	-	4555.Si032585m|-133.8|ENOG410XNV7|O|aspartic	-	O04496|AED3_ARATH|-90.0|Aspartyl protease AED3 OS=Arabidopsis thaliana GN=AED3 PE=1 SV=1	XP_008782021.1|-147.1|PREDICTED: aspartyl protease AED3-like [Phoenix dactylifera]
c156981_g1	cluster 2	1.83157	0.000424378	0.00588839	up	2.62704	8.82934e-05	0.00448533	up	-	-	-	-	-	-	-	-	-	XP_020248226.1|-53.6|protein HVA22-like [Asparagus officinalis]
c184874_g1	cluster 2	1.56802	0.000144936	0.00416038	up	2.83105	6.65754e-05	0.00423762	up	-	-	-	-	-	-	-	-	-	-
c199215_g1	cluster 4	-	-	-	-	2.14561	0.00026006	0.00605843	up	-	-	-	-	-	-	-	-	-	-
c217260_g10	cluster 2	-	-	-	-	2.37642	0.001773	0.0122451	up	-1.11266	0.00264209	0.0380946	down	biological_process:carbohydrate metabolic process(GO:0005975);;biological_process:metabolic process(GO:0008152);;molecular_function:cellulase activity(GO:0008810);;molecular_function:hydrolase activity(GO:0016787);;molecular_function:hydrolase activity, acting on glycosyl bonds(GO:0016798);;biological_process:cellulose catabolic process(GO:0030245);;biological_process:cell wall organization(GO:00…	pda:103704338|-146.7|K01179|E3.2.1.4; endoglucanase [EC:3.2.1.4]|ko00500|Starch and sucrose metabolism;;	4558.Sb02g030710.1|-140.6|ENOG410YC2H|G|endo-glucanase	PF00759.17|Glyco_hydro_9|1.2e-62|Glycosyl hydrolase family 9	Q69NF5|GUN23_ORYSJ|-138.7|Endoglucanase 23 OS=Oryza sativa subsp. japonica GN=GLU12 PE=2 SV=1	XP_020243781.1|-150.9|LOW QUALITY PROTEIN: endoglucanase 23-like [Asparagus officinalis]
c209627_g1	cluster 4	2.36168	0.0105202	0.0335436	up	2.71984	0.00860995	0.0303993	up	-	-	-	-	-	-	-	-	-	-
c181638_g1	cluster 4	1.47016	0.00294773	0.0151555	up	2.86515	3.20292e-05	0.00394232	up	-1.16155	0.000884607	0.0267644	down	-	-	4641.GSMUA_Achr6P00220_001|-77.6|ENOG410YBFD|S|X8 domain	-	-	ONK74895.1|-80.7|uncharacterized protein A4U43_C03F11220 [Asparagus officinalis]
c211787_g1	cluster 4	-1.27969	0.00664614	0.0248006	down	-	-	-	-	-3.29588	0.000185745	0.0197638	down	molecular_function:alliin lyase activity(GO:0047654);;cellular_component:vacuole(GO:0005773);;cellular_component:vacuole(GO:0005773);;molecular_function:lyase activity(GO:0016829)	-	3847.GLYMA09G07340.1|-103.2|ENOG410XS9Z|S|tryptophan aminotransferase-related protein 4-like	PF04864.11|Alliinase_C|5.7e-135|Allinase	Q01594|ALLN1_ALLSA|-116.1|Alliin lyase 1 OS=Allium sativum PE=1 SV=1	AAF36437.1|-117.5|cysteine-sulphoxide lyase [Allium cepa]
c229036_g4	cluster 4	-	-	-	-	2.2055	0.00861127	0.0304009	up	-2.60067	0.000855786	0.0266032	down	biological_process:carbohydrate metabolic process(GO:0005975);;biological_process:metabolic process(GO:0008152);;molecular_function:cellulase activity(GO:0008810);;molecular_function:hydrolase activity(GO:0016787);;molecular_function:hydrolase activity, acting on glycosyl bonds(GO:0016798);;biological_process:cellulose catabolic process(GO:0030245);;biological_process:cell wall organization(GO:00…	nnu:104607523|-60.0|K01179|E3.2.1.4; endoglucanase [EC:3.2.1.4]|ko00500|Starch and sucrose metabolism;;	4641.GSMUA_Achr1P07760_001|-61.0|ENOG410YC2H|G|endo-glucanase	-	Q69NF5|GUN23_ORYSJ|-57.3|Endoglucanase 23 OS=Oryza sativa subsp. japonica GN=GLU12 PE=2 SV=1	ONK58822.1|-61.2|uncharacterized protein A4U43_C08F100 [Asparagus officinalis]
c191326_g2	cluster 4	-	-	-	-	2.12483	0.00118631	0.010277	up	-2.77121	0.000324767	0.0218913	down	-	-	-	PF04864.11|Alliinase_C|4.8e-67|Allinase	-	-
c191326_g1	cluster 4	-	-	-	-	-	-	-	-	-3.5861	0.000897881	0.0268931	down	-	-	-	-	-	-
c187236_g1	cluster 4	-	-	-	-	2.03662	0.00276531	0.0155793	up	-3.20626	0.00126933	0.0298236	down	molecular_function:alliin lyase activity(GO:0047654);;cellular_component:vacuole(GO:0005773);;cellular_component:vacuole(GO:0005773);;molecular_function:lyase activity(GO:0016829)	-	4555.Si001197m|-105.1|ENOG410XS9Z|S|tryptophan aminotransferase-related protein 4-like	PF04864.11|Alliinase_C|6.8e-138|Allinase	P31756|ALLN_ALLCG|-115.3|Alliin lyase (Fragment) OS=Allium cepa var. aggregatum PE=2 SV=1	AAF36437.1|-114.4|cysteine-sulphoxide lyase [Allium cepa]
c2033_g2	cluster 1	2.43312	0.00100867	0.00858096	up	2.49684	0.000395704	0.00675745	up	3.35878	0.00100814	0.0277191	up	-	-	-	-	-	XP_020275636.1|-48.9|ricin B-like lectin R40C1 [Asparagus officinalis]
c231786_g1	cluster 3	-2.71331	5.5116e-05	0.00351314	down	-3.77233	1.37125e-05	0.00358977	down	-3.12527	0.000773202	0.0256554	down	biological_process:defense response(GO:0006952);;cellular_component:membrane(GO:0016020);;cellular_component:membrane(GO:0016020);;cellular_component:integral component of membrane(GO:0016021);;molecular_function:kinase activity(GO:0016301);;biological_process:phosphorylation(GO:0016310);;molecular_function:transferase activity(GO:0016740);;molecular_function:carbohydrate binding(GO:0030246);;mol…	-	15368.BRADI4G02250.1|-144.8|ENOG410YBN4|T|G-type lectin S-receptor-like serine threonine-protein kinase	-	Q7FAZ2|LERK2_ORYSJ|-152.8|G-type lectin S-receptor-like serine/threonine-protein kinase LECRK2 OS=Oryza sativa subsp. japonica GN=LECRK2 PE=3 SV=1	XP_020241714.1|-194.9|G-type lectin S-receptor-like serine/threonine-protein kinase LECRK2 [Asparagus officinalis]
c223391_g3	cluster 3	-7.04643	6.88071e-05	0.00358151	down	-6.10203	0.0020348	0.0131468	down	-4.78487	0.000808927	0.0260925	down	biological_process:defense response(GO:0006952);;molecular_function:carbohydrate binding(GO:0030246);;molecular_function:mannose binding(GO:0005537);;cellular_component:extracellular region(GO:0005576);;cellular_component:extracellular region(GO:0005576)	-	-	-	P83886|ASAL_ALLSA|-56.4|Mannose-specific lectin OS=Allium sativum GN=LECASAL PE=1 SV=3	CAD10666.1|-81.6|lectin [Binary vector pGV4126]
c171067_g1	cluster 3	-2.16145	0.00287836	0.0149545	down	-2.38665	0.0140552	0.0419305	down	-3.06649	0.000324822	0.0218913	down	-	-	-	-	-	XP_008798183.1|-58.1|PREDICTED: mannose-specific lectin 3-like [Phoenix dactylifera]
c221021_g2	cluster 2	1.6672	0.00307924	0.0155441	up	1.01947	0.00741014	0.0277307	up	-	-	-	-	-	-	4558.Sb02g035940.1|-56.5|COG0515|T|Serine Threonine protein kinase	-	-	XP_020256478.1|-64.9|G-type lectin S-receptor-like serine/threonine-protein kinase B120 [Asparagus officinalis]
c178344_g1	cluster 3	-3.07693	0.000880854	0.0080578	down	-3.57648	0.000426872	0.00695899	down	-3.61681	0.000346046	0.0220538	down	-	-	-	-	-	XP_008798183.1|-62.2|PREDICTED: mannose-specific lectin 3-like [Phoenix dactylifera]
c217337_g4	cluster 3	-2.18105	0.00150217	0.0104719	down	-3.96184	0.000257673	0.00604672	down	-	-	-	-	-	-	3847.GLYMA18G27491.1|-58.5|-|-|-	PF00139.17|Lectin_legB|9.4e-62|Legume lectin domain	-	XP_003551297.1|-57.2|PREDICTED: agglutinin-2-like [Glycine max]
c221582_g1	cluster 3	-1.98291	0.000963271	0.00838462	down	-2.34368	0.000248765	0.00596387	down	-1.76803	0.000865857	0.0266032	down	-	-	4558.Sb07g027400.1|-99.3|COG0515|T|Serine Threonine protein kinase	PF00139.17|Lectin_legB|1.9e-62|Legume lectin domain	-	XP_020672789.1|-103.1|probable L-type lectin-domain containing receptor kinase S.5 [Dendrobium catenatum]
c229522_g1	cluster 3	-1.89162	0.00141334	0.0101227	down	-2.61143	4.71548e-05	0.00410806	down	-2.62788	6.98374e-05	0.0178336	down	-	-	39946.BGIOSGA015377-PA|-112.8|ENOG410YBSH|T|G-type lectin S-receptor-like serine threonine-protein kinase	-	-	CAH66217.1|-112.6|OSIGBa0157N01.3 [Oryza sativa Indica Group]
c231786_g4	cluster 3	-2.12688	0.00334179	0.0162646	down	-3.55027	0.00360617	0.018036	down	-2.5706	0.00358271	0.0423706	down	-	-	-	-	-	XP_020241834.1|-58.9|G-type lectin S-receptor-like serine/threonine-protein kinase LECRK2 isoform X1 [Asparagus officinalis]
c131339_g2	cluster 3	-3.5563	2.64488e-05	0.00324003	down	-3.84638	0.0145266	0.0428993	down	-3.8933	0.00245766	0.0367568	down	-	-	-	-	-	AAB64239.1|-101.2|lectin related protein, partial [Allium sativum]
c199309_g1	cluster 3	-1.58519	0.00550995	0.0220729	down	-2.14312	0.00303767	0.0164075	down	-	-	-	-	biological_process:defense response(GO:0006952);;cellular_component:membrane(GO:0016020);;cellular_component:membrane(GO:0016020);;cellular_component:integral component of membrane(GO:0016021);;molecular_function:kinase activity(GO:0016301);;biological_process:phosphorylation(GO:0016310);;molecular_function:transferase activity(GO:0016740);;molecular_function:carbohydrate binding(GO:0030246);;mol…	-	3694.POPTR_0200s00200.1|-68.3|ENOG410YBN4|T|G-type lectin S-receptor-like serine threonine-protein kinase	-	A0A075F7E9|LERK1_ORYSI|-64.3|G-type lectin S-receptor-like serine/threonine-protein kinase LECRK1 OS=Oryza sativa subsp. indica GN=LECRK1 PE=1 SV=2	XP_020241834.1|-83.4|G-type lectin S-receptor-like serine/threonine-protein kinase LECRK2 isoform X1 [Asparagus officinalis]
c223391_g2	cluster 3	-2.67635	0.000232769	0.00468683	down	-	-	-	-	-4.43446	0.00114902	0.028891	down	biological_process:defense response(GO:0006952);;molecular_function:carbohydrate binding(GO:0030246);;molecular_function:mannose binding(GO:0005537);;cellular_component:extracellular region(GO:0005576);;cellular_component:extracellular region(GO:0005576)	-	-	-	P83886|ASAL_ALLSA|-70.0|Mannose-specific lectin OS=Allium sativum GN=LECASAL PE=1 SV=3	AAC37361.1|-67.4|mannose specific lectin [Allium ampeloprasum]
c221117_g1	cluster 1	-	-	-	-	1.16223	8.13743e-05	0.00435085	up	-	-	-	-	cellular_component:Golgi apparatus(GO:0005794);;biological_process:protein glycosylation(GO:0006486);;biological_process:arabinogalactan protein metabolic process(GO:0010405);;cellular_component:membrane(GO:0016020);;cellular_component:integral component of membrane(GO:0016021);;molecular_function:transferase activity(GO:0016740);;molecular_function:transferase activity, transferring glycosyl gro…	-	29760.VIT_10s0003g04120.t01|-247.1|ENOG410ZZ1B|S|UDP-GlcNAc beta-Gal beta-1,3-N-acetylglucosaminyltransferase	-	A7XDQ9|B3GTK_ARATH|-227.8|Hydroxyproline O-galactosyltransferase GALT2 OS=Arabidopsis thaliana GN=GALT2 PE=1 SV=1	OVA11565.1|-246.0|Galectin [Macleaya cordata]
c228444_g1	cluster 3	-	-	-	-	-	-	-	-	-	-	-	-	cellular_component:membrane(GO:0016020);;cellular_component:membrane(GO:0016020);;cellular_component:integral component of membrane(GO:0016021);;molecular_function:kinase activity(GO:0016301);;biological_process:phosphorylation(GO:0016310);;molecular_function:transferase activity(GO:0016740);;molecular_function:carbohydrate binding(GO:0030246);;molecular_function:nucleotide binding(GO:0000166);;m…	-	39946.BGIOSGA013639-PA|-224.1|COG0515|T|Serine Threonine protein kinase	PF00139.17|Lectin_legB|6.5e-77|Legume lectin domain	O80939|LRK41_ARATH|-204.3|L-type lectin-domain containing receptor kinase IV.1 OS=Arabidopsis thaliana GN=LECRK41 PE=2 SV=1	XP_020256335.1|-267.7|L-type lectin-domain containing receptor kinase IV.1-like isoform X1 [Asparagus officinalis]
c222818_g1	cluster 4	-	-	-	-	-	-	-	-	-	-	-	-	cellular_component:membrane(GO:0016020);;cellular_component:membrane(GO:0016020);;cellular_component:integral component of membrane(GO:0016021);;molecular_function:kinase activity(GO:0016301);;biological_process:phosphorylation(GO:0016310);;molecular_function:transferase activity(GO:0016740);;molecular_function:carbohydrate binding(GO:0030246);;molecular_function:nucleotide binding(GO:0000166);;m…	-	4538.ORGLA04G0167800.1|-221.1|COG0515|T|Serine Threonine protein kinase	PF00139.17|Lectin_legB|5.1e-80|Legume lectin domain	O80939|LRK41_ARATH|-207.8|L-type lectin-domain containing receptor kinase IV.1 OS=Arabidopsis thaliana GN=LECRK41 PE=2 SV=1	XP_020256343.1|-272.3|L-type lectin-domain containing receptor kinase IV.1-like [Asparagus officinalis]
c228732_g1	cluster 2	2.4851	0.000337527	0.00537133	up	2.23756	0.00480631	0.0213525	up	1.38802	0.00277291	0.0387811	up	cellular_component:plasma membrane(GO:0005886);;cellular_component:plasma membrane(GO:0005886);;cellular_component:plasma membrane(GO:0005886);;biological_process:defense response(GO:0006952);;biological_process:multicellular organism development(GO:0007275);;biological_process:pollen development(GO:0009555);;cellular_component:membrane(GO:0016020);;cellular_component:integral component of membra…	-	4538.ORGLA04G0167700.1|-219.6|COG0515|T|Serine Threonine protein kinase	PF00139.17|Lectin_legB|1.7e-74|Legume lectin domain	Q9M345|LRK42_ARATH|-193.5|L-type lectin-domain containing receptor kinase IV.2 OS=Arabidopsis thaliana GN=LECRK42 PE=2 SV=1	XP_010943349.1|-235.3|PREDICTED: L-type lectin-domain containing receptor kinase IV.1-like [Elaeis guineensis]
c220756_g1	cluster 3	-1.33968	0.00172486	0.0113156	down	-3.26697	4.26456e-05	0.00399099	down	-	-	-	-	molecular_function:calmodulin binding(GO:0005516);;molecular_function:ATP binding(GO:0005524);;cellular_component:plasma membrane(GO:0005886);;cellular_component:plasma membrane(GO:0005886);;cellular_component:membrane(GO:0016020);;cellular_component:integral component of membrane(GO:0016021);;molecular_function:kinase activity(GO:0016301);;biological_process:phosphorylation(GO:0016310);;molecula…	-	59689.fgenesh2_kg.3__3521__AT2G19130.1|-214.4|ENOG410YEQP|T|serine threonine-protein kinase	-	O64477|Y2913_ARATH|-194.0|G-type lectin S-receptor-like serine/threonine-protein kinase At2g19130 OS=Arabidopsis thaliana GN=At2g19130 PE=2 SV=1	XP_019705509.1|-249.4|PREDICTED: G-type lectin S-receptor-like serine/threonine-protein kinase At2g19130 [Elaeis guineensis]
c205244_g1	cluster 3	-1.11086	0.00342696	0.0165019	down	-1.73471	0.00175276	0.0121756	down	-1.48264	0.00393501	0.044136	down	molecular_function:calmodulin binding(GO:0005516);;molecular_function:ATP binding(GO:0005524);;cellular_component:plasma membrane(GO:0005886);;cellular_component:plasma membrane(GO:0005886);;cellular_component:membrane(GO:0016020);;cellular_component:integral component of membrane(GO:0016021);;molecular_function:kinase activity(GO:0016301);;biological_process:phosphorylation(GO:0016310);;molecula…	-	4113.PGSC0003DMT400093243|-229.1|ENOG410YEQP|T|serine threonine-protein kinase	-	O64477|Y2913_ARATH|-218.1|G-type lectin S-receptor-like serine/threonine-protein kinase At2g19130 OS=Arabidopsis thaliana GN=At2g19130 PE=2 SV=1	XP_020256466.1|-308.4|G-type lectin S-receptor-like serine/threonine-protein kinase At2g19130 [Asparagus officinalis]
c178499_g1	cluster 3	-1.00341	0.0133517	0.0393921	down	-1.80469	0.00222701	0.0138378	down	-1.48745	0.00443426	0.0460175	down	molecular_function:calmodulin binding(GO:0005516);;molecular_function:ATP binding(GO:0005524);;cellular_component:plasma membrane(GO:0005886);;cellular_component:plasma membrane(GO:0005886);;cellular_component:membrane(GO:0016020);;cellular_component:integral component of membrane(GO:0016021);;molecular_function:kinase activity(GO:0016301);;biological_process:phosphorylation(GO:0016310);;molecula…	-	3694.POPTR_0010s11390.1|-221.9|COG0515|T|Serine Threonine protein kinase	-	Q9FLV4|Y5248_ARATH|-70.6|G-type lectin S-receptor-like serine/threonine-protein kinase At5g24080 OS=Arabidopsis thaliana GN=At5g24080 PE=2 SV=1	XP_020104338.1|-226.1|G-type lectin S-receptor-like serine/threonine-protein kinase At1g34300 [Ananas comosus]
c179680_g1	cluster 3	-1.07115	0.00466971	0.019886	down	-	-	-	-	-	-	-	-	molecular_function:calmodulin binding(GO:0005516);;molecular_function:ATP binding(GO:0005524);;cellular_component:plasma membrane(GO:0005886);;cellular_component:plasma membrane(GO:0005886);;cellular_component:membrane(GO:0016020);;cellular_component:integral component of membrane(GO:0016021);;molecular_function:kinase activity(GO:0016301);;biological_process:phosphorylation(GO:0016310);;molecula…	-	4533.OB03G47380.1|-306.3|COG0515|T|Serine Threonine protein kinase	-	Q9XID3|Y1343_ARATH|-251.4|G-type lectin S-receptor-like serine/threonine-protein kinase At1g34300 OS=Arabidopsis thaliana GN=At1g34300 PE=2 SV=1	XP_020263389.1|-10000.0|G-type lectin S-receptor-like serine/threonine-protein kinase At1g34300 [Asparagus officinalis]
c222203_g1	cluster 3	-1.36178	0.013856	0.0404006	down	-2.59062	0.00628897	0.0250049	down	-2.19787	0.00535908	0.0493353	down	molecular_function:calmodulin binding(GO:0005516);;molecular_function:ATP binding(GO:0005524);;cellular_component:plasma membrane(GO:0005886);;cellular_component:plasma membrane(GO:0005886);;cellular_component:membrane(GO:0016020);;cellular_component:integral component of membrane(GO:0016021);;molecular_function:kinase activity(GO:0016301);;biological_process:phosphorylation(GO:0016310);;molecula…	-	4555.Si000270m|-100.3|ENOG410YBSH|T|G-type lectin S-receptor-like serine threonine-protein kinase	-	Q8RWZ5|SD25_ARATH|-80.3|G-type lectin S-receptor-like serine/threonine-protein kinase SD2-5 OS=Arabidopsis thaliana GN=SD25 PE=1 SV=1	XP_019707254.1|-107.4|PREDICTED: LOW QUALITY PROTEIN: uncharacterized protein LOC105048149 [Elaeis guineensis]
c2033_g1	cluster 1	1.73427	0.00114276	0.00915582	up	2.14384	0.000441914	0.00702538	up	2.92321	0.000607807	0.0246104	up	molecular_function:carbohydrate binding(GO:0030246)	-	4641.GSMUA_Achr11P25060_001|-70.6|ENOG4111FUQ|S|NA	-	Q6Z4N4|40G3_ORYSJ|-77.7|Ricin B-like lectin R40G3 OS=Oryza sativa subsp. japonica GN=R40G3 PE=2 SV=1	XP_020275636.1|-92.7|ricin B-like lectin R40C1 [Asparagus officinalis]
c220775_g1	cluster 1	1.24422	0.00133109	0.00983072	up	1.14776	0.00181272	0.0123755	up	1.37042	0.00399272	0.0443936	up	molecular_function:carbohydrate binding(GO:0030246)	-	4641.GSMUA_Achr6P32310_001|-81.6|ENOG410YRN6|S|Stress responsive protein	-	Q6Z4N4|40G3_ORYSJ|-61.9|Ricin B-like lectin R40G3 OS=Oryza sativa subsp. japonica GN=R40G3 PE=2 SV=1	XP_009402424.1|-82.7|PREDICTED: uncharacterized protein LOC103986215 [Musa acuminata subsp. malaccensis]
c172729_g1	cluster 6	-	-	-	-	-	-	-	-	-	-	-	-	molecular_function:carbohydrate binding(GO:0030246)	-	4641.GSMUA_Achr6P32310_001|-124.3|ENOG410YRN6|S|Stress responsive protein	-	Q6Z4N4|40G3_ORYSJ|-117.2|Ricin B-like lectin R40G3 OS=Oryza sativa subsp. japonica GN=R40G3 PE=2 SV=1	XP_020275636.1|-135.9|ricin B-like lectin R40C1 [Asparagus officinalis]
c227294_g1	cluster 3	-1.53661	0.000337097	0.00536944	down	-1.87899	0.00106352	0.00980131	down	-1.4987	0.00530799	0.0491617	down	molecular_function:transferase activity(GO:0016740);;molecular_function:protein serine/threonine kinase activity(GO:0004674);;molecular_function:carbohydrate binding(GO:0030246);;molecular_function:protein binding(GO:0005515);;molecular_function:ATP binding(GO:0005524);;cellular_component:plasma membrane(GO:0005886);;cellular_component:plasma membrane(GO:0005886);;cellular_component:plasma membra…	-	4555.Si032542m|-163.7|COG0515|T|Serine Threonine protein kinase	PF00139.17|Lectin_legB|4e-69|Legume lectin domain	Q9LXA5|LRK91_ARATH|-126.8|L-type lectin-domain containing receptor kinase IX.1 OS=Arabidopsis thaliana GN=LECRK91 PE=1 SV=1	XP_020256658.1|-197.8|L-type lectin-domain containing receptor kinase IX.1-like [Asparagus officinalis]
c144142_g1	cluster 1	6.54382	7.22596e-07	0.00183407	up	8.05934	3.70359e-06	0.00301884	up	7.33398	1.17537e-06	0.00730546	up	biological_process:metabolic process(GO:0008152);;molecular_function:beta-glucosidase activity(GO:0008422);;molecular_function:beta-glucosidase activity(GO:0008422);;molecular_function:hydrolase activity(GO:0016787);;molecular_function:hydrolase activity, acting on glycosyl bonds(GO:0016798);;molecular_function:metal ion binding(GO:0046872);;molecular_function:scopolin beta-glucosidase activity(G…	egu:105033762|-243.1|K05350|bglB; beta-glucosidase [EC:3.2.1.21]|ko00940|Phenylpropanoid biosynthesis;;ko00460|Cyanoamino acid metabolism;;ko00500|Starch and sucrose metabolism;;	4641.GSMUA_Achr3P29530_001|-235.7|COG2723|G|beta-glucosidase	PF00232.16|Glyco_hydro_1|2.5e-158|Glycosyl hydrolase family 1	Q9LV33|BGL44_ARATH|-221.4|Beta-glucosidase 44 OS=Arabidopsis thaliana GN=BGLU44 PE=2 SV=1	XP_020263929.1|-255.4|beta-glucosidase 1-like [Asparagus officinalis]
c220198_g1	cluster 1	5.18154	2.26741e-05	0.00319519	up	5.28205	6.78113e-06	0.00336618	up	4.64893	1.01326e-05	0.0135525	up	cellular_component:integral component of membrane(GO:0016021);;biological_process:nitrate assimilation(GO:0042128);;biological_process:transport(GO:0006810);;cellular_component:membrane(GO:0016020);;cellular_component:membrane(GO:0016020)	-	4641.GSMUA_Achr5P24480_001|-200.3|COG3104|E|transporter	PF00854.19|PTR2|4.6e-95|POT family	Q9SX20|PTR18_ARATH|-188.1|Protein NRT1/ PTR FAMILY 3.1 OS=Arabidopsis thaliana GN=NPF3.1 PE=2 SV=1	XP_010907323.1|-200.5|PREDICTED: protein NRT1/ PTR FAMILY 3.1 isoform X1 [Elaeis guineensis]
c223769_g2	cluster 1	5.16287	3.7399e-05	0.00334192	up	5.65864	3.87109e-05	0.00395273	up	5.35647	2.46719e-05	0.0153434	up	molecular_function:hydrolase activity, acting on glycosyl bonds(GO:0016798);;molecular_function:scopolin beta-glucosidase activity(GO:0102483);;biological_process:metabolic process(GO:0008152);;molecular_function:beta-glucosidase activity(GO:0008422);;molecular_function:hydrolase activity(GO:0016787)	pda:103715362|-136.0|K01188|E3.2.1.21; beta-glucosidase [EC:3.2.1.21]|ko00940|Phenylpropanoid biosynthesis;;ko00460|Cyanoamino acid metabolism;;ko00500|Starch and sucrose metabolism;;	4513.MLOC_7890.1|-157.4|COG2723|G|beta-glucosidase	PF00232.16|Glyco_hydro_1|3.7e-142|Glycosyl hydrolase family 1	B7F7K7|BGL31_ORYSJ|-158.2|Beta-glucosidase 31 OS=Oryza sativa subsp. japonica GN=BGLU31 PE=2 SV=1	XP_020247295.1|-165.7|beta-glucosidase 31-like isoform X2 [Asparagus officinalis]
c205205_g1	cluster 1	4.6674	6.52641e-06	0.00244865	up	5.03904	9.22093e-05	0.00456725	up	4.15416	2.48538e-05	0.0153434	up	molecular_function:metal ion binding(GO:0046872);;molecular_function:lyase activity(GO:0016829);;molecular_function:pectate lyase activity(GO:0030570);;biological_process:pectin catabolic process(GO:0045490)	pper:PRUPE_ppa003600mg|-171.7|K01728|pel; pectate lyase [EC:4.2.2.2]|ko00040|Pentose and glucuronate interconversions;;	15368.BRADI3G27926.1|-169.0|COG3866|G|pectate lyase activity	-	Q9SCP2|PLY12_ARATH|-152.1|Probable pectate lyase 12 OS=Arabidopsis thaliana GN=At3g53190 PE=2 SV=2	XP_020690149.1|-175.0|probable pectate lyase 5 [Dendrobium catenatum]
c199231_g1	cluster 1	6.08817	0.000155283	0.00421233	up	5.80949	0.000184084	0.00543688	up	4.3799	0.00139975	0.0305232	up	cellular_component:membrane(GO:0016020);;cellular_component:integral component of membrane(GO:0016021);;cellular_component:plasma membrane(GO:0005886);;cellular_component:plasma membrane(GO:0005886);;biological_process:transport(GO:0006810)	-	4641.GSMUA_Achr11P21010_001|-116.6|COG0580|G|Channel that permits osmotically driven movement of water in both directions. It is involved in the osmoregulation and in the maintenance of cell turgor during volume expansion in rapidly growing cells. It mediates rapid entry or exit of water in response to abrupt changes in osmolarity (By similarity)	PF00230.18|MIP|2.6e-75|Major intrinsic protein	Q84RL6|TIP23_MAIZE|-114.9|Aquaporin TIP2-3 OS=Zea mays GN=TIP2-3 PE=2 SV=2	XP_017223603.1|-115.9|PREDICTED: probable aquaporin TIP2-2 [Daucus carota subsp. sativus]
c183532_g1	cluster 1	3.88994	0.000937763	0.00828197	up	3.76763	0.00132468	0.010772	up	3.78459	0.00125678	0.0297187	up	biological_process:metabolic process(GO:0008152);;cellular_component:plasmodesma(GO:0009506);;cellular_component:membrane(GO:0016020);;molecular_function:hydrolase activity(GO:0016787);;molecular_function:hydrolase activity, acting on glycosyl bonds(GO:0016798);;cellular_component:cell junction(GO:0030054);;cellular_component:anchored component of membrane(GO:0031225);;molecular_function:glucan e…	-	15368.BRADI3G20770.1|-125.2|ENOG4111BDN|G|Glycosyl hydrolases family 17 protein, expressed	PF00332.16|Glyco_hydro_17|5.7e-88|Glycosyl hydrolases family 17	Q9FHX5|E1310_ARATH|-107.9|Glucan endo-1,3-beta-glucosidase 10 OS=Arabidopsis thaliana GN=At5g42100 PE=1 SV=1	XP_020575281.1|-133.8|glucan endo-1,3-beta-glucosidase 11-like [Phalaenopsis equestris]
c217242_g1	cluster 1	4.4065	0.00134597	0.00989852	up	4.42303	5.71874e-05	0.00418091	up	3.39922	0.000824036	0.0263574	up	molecular_function:hydrolase activity(GO:0016787);;biological_process:proteolysis(GO:0006508);;molecular_function:peptidase activity(GO:0008233);;molecular_function:cysteine-type peptidase activity(GO:0008234)	-	4641.GSMUA_Achr6P35740_001|-214.8|COG5206|O|phosphatidylinositol glycan anchor biosynthesis, class K	PF01650.16|Peptidase_C13|2.7e-110|Peptidase C13 family	P49043|VPE_CITSI|-193.2|Vacuolar-processing enzyme OS=Citrus sinensis PE=2 SV=1	XP_020265168.1|-223.3|vacuolar-processing enzyme-like [Asparagus officinalis]
c201088_g1	cluster 2	4.20981	0.000100209	0.00390674	up	3.75251	0.00126346	0.0105973	up	1.92946	0.000695514	0.0252622	up	cellular_component:plasma membrane(GO:0005886);;cellular_component:plasma membrane(GO:0005886);;biological_process:defense response(GO:0006952);;biological_process:metabolic process(GO:0008152);;cellular_component:membrane(GO:0016020);;molecular_function:hydrolase activity(GO:0016787);;molecular_function:hydrolase activity, acting on glycosyl bonds(GO:0016798);;cellular_component:anchored compone…	-	4558.Sb04g034530.1|-185.2|ENOG410Y94B|G|glucan endo-1-3-beta-glucosidase	PF00332.16|Glyco_hydro_17|1.1e-99|Glycosyl hydrolases family 17	Q8L868|E1311_ARATH|-86.3|Glucan endo-1,3-beta-glucosidase 11 OS=Arabidopsis thaliana GN=At1g32860 PE=1 SV=1	XP_010928243.1|-199.8|PREDICTED: glucan endo-1,3-beta-glucosidase 10-like [Elaeis guineensis]
c155953_g1	cluster 3	-3.78059	0.000565647	0.00666396	down	-4.88169	0.00013766	0.00503206	down	-4.23378	0.00335713	0.041418	down	molecular_function:hydrolase activity(GO:0016787);;molecular_function:hydrolase activity, acting on glycosyl bonds(GO:0016798);;molecular_function:glucan endo-1,3-beta-D-glucosidase activity(GO:0042973);;biological_process:defense response(GO:0006952);;biological_process:metabolic process(GO:0008152);;biological_process:response to biotic stimulus(GO:0009607)	-	4641.GSMUA_Achr10P01250_001|-105.6|ENOG410YAHP|G|glucan endo-1-3-beta-glucosidase	PF00332.16|Glyco_hydro_17|3.1e-118|Glycosyl hydrolases family 17	A7PQW3|E13B_VITVI|-97.9|Glucan endo-1,3-beta-glucosidase OS=Vitis vinifera GN=VIT_06s0061g00120 PE=1 SV=2	XP_010907249.1|-109.2|PREDICTED: glucan endo-1,3-beta-glucosidase-like [Elaeis guineensis]
c197248_g1	cluster 1	4.0996	0.00173627	0.011353	up	4.8709	0.000499795	0.0073134	up	3.84379	0.00106359	0.0281112	up	molecular_function:hydrolase activity, acting on glycosyl bonds(GO:0016798);;molecular_function:scopolin beta-glucosidase activity(GO:0102483);;biological_process:metabolic process(GO:0008152);;molecular_function:beta-glucosidase activity(GO:0008422);;molecular_function:hydrolase activity(GO:0016787)	egu:105036001|-224.7|K01188|E3.2.1.21; beta-glucosidase [EC:3.2.1.21]|ko00940|Phenylpropanoid biosynthesis;;ko00460|Cyanoamino acid metabolism;;ko00500|Starch and sucrose metabolism;;	4558.Sb10g027600.1|-217.7|COG2723|G|beta-glucosidase	PF00232.16|Glyco_hydro_1|2e-158|Glycosyl hydrolase family 1	Q0DA21|BGL25_ORYSJ|-215.0|Beta-glucosidase 25 OS=Oryza sativa subsp. japonica GN=BGLU25 PE=2 SV=2	XP_020270484.1|-231.1|beta-glucosidase 25 [Asparagus officinalis]
c197009_g1	cluster 1	1.07821	0.000258611	0.00485272	up	1.19707	0.00341994	0.0175131	up	1.21194	0.00156227	0.0315951	up	biological_process:metabolic process(GO:0008152);;cellular_component:chloroplast(GO:0009507);;cellular_component:chloroplast(GO:0009507);;cellular_component:chloroplast(GO:0009507);;cellular_component:plastid(GO:0009536);;molecular_function:hydrolase activity(GO:0016787);;molecular_function:hydrolase activity, acting on glycosyl bonds(GO:0016798);;molecular_function:beta-fructofuranosidase activi…	-	4641.GSMUA_Achr6P17270_001|-265.1|ENOG410XPYN|S|glycopeptide alpha-N-acetylgalactosaminidase activity	PF12899.5|Glyco_hydro_100|3.9e-212|Alkaline and neutral invertase	Q6H6N5|NIN3_ORYSJ|-261.5|Neutral/alkaline invertase 3, chloroplastic OS=Oryza sativa subsp. japonica GN=NIN3 PE=2 SV=1	XP_008788363.1|-266.7|PREDICTED: neutral/alkaline invertase 3, chloroplastic [Phoenix dactylifera]
c216734_g1	cluster 1	-	-	-	-	1.34817	0.00150361	0.0113578	up	1.10355	0.00359177	0.042386	up	-	egu:105046272|-276.0|K05349|bglX; beta-glucosidase [EC:3.2.1.21]|ko00940|Phenylpropanoid biosynthesis;;ko00460|Cyanoamino acid metabolism;;ko00500|Starch and sucrose metabolism;;	4555.Si021490m|-261.0|COG1472|G|hydrolase family 3	PF00933.19|Glyco_hydro_3|3e-77|Glycosyl hydrolase family 3 N terminal domain	-	XP_010923122.1|-275.2|PREDICTED: uncharacterized protein LOC105046272 [Elaeis guineensis]
c230818_g2	cluster 2	3.47518	2.36602e-05	0.00319519	up	2.43441	0.00104695	0.00974582	up	-	-	-	-	-	egu:105045201|-49.8|K01188|E3.2.1.21; beta-glucosidase [EC:3.2.1.21]|ko00940|Phenylpropanoid biosynthesis;;ko00460|Cyanoamino acid metabolism;;ko00500|Starch and sucrose metabolism;;	29760.VIT_07s0005g00390.t01|-50.7|COG2723|G|beta-glucosidase	-	-	XP_020274274.1|-53.2|beta-glucosidase 11-like [Asparagus officinalis]
c231722_g1	cluster 2	2.09913	0.00177846	0.0114855	up	-	-	-	-	-	-	-	-	-	jcu:105642520|-54.2|K01188|E3.2.1.21; beta-glucosidase [EC:3.2.1.21]|ko00940|Phenylpropanoid biosynthesis;;ko00460|Cyanoamino acid metabolism;;ko00500|Starch and sucrose metabolism;;	-	-	-	XP_012082756.1|-53.4|beta-glucosidase 11 [Jatropha curcas]
c231722_g3	cluster 2	1.59881	0.000570267	0.00668996	up	-	-	-	-	-	-	-	-	-	vra:106758793|-50.7|K01188|E3.2.1.21; beta-glucosidase [EC:3.2.1.21]|ko00940|Phenylpropanoid biosynthesis;;ko00460|Cyanoamino acid metabolism;;ko00500|Starch and sucrose metabolism;;	-	-	-	XP_020274274.1|-53.2|beta-glucosidase 11-like [Asparagus officinalis]
c217066_g2	cluster 5	-	-	-	-	1.038	0.00026978	0.0061316	up	1.59193	0.000815904	0.026163	up	biological_process:metabolic process(GO:0008152);;cellular_component:membrane(GO:0016020);;cellular_component:integral component of membrane(GO:0016021);;molecular_function:hydrolase activity(GO:0016787);;molecular_function:hydrolase activity, acting on glycosyl bonds(GO:0016798);;molecular_function:mannosyl-oligosaccharide glucosidase activity(GO:0004573);;cellular_component:endoplasmic reticulu…	pda:103706515|-10000.0|K01228|GCS1; mannosyl-oligosaccharide glucosidase [EC:3.2.1.106]|ko00510|N-Glycan biosynthesis;;ko04141|Protein processing in endoplasmic reticulum;;	4555.Si000266m|-302.0|ENOG410XTHA|S|mannosyloligosaccharide glucosidase	PF03200.14|Glyco_hydro_63|4.3e-213|Glycosyl hydrolase family 63 C-terminal domain	F4HTM3|GCS1_ARATH|-284.2|Mannosyl-oligosaccharide glucosidase GCS1 OS=Arabidopsis thaliana GN=GCS1 PE=1 SV=1	XP_008788865.1|-10000.0|PREDICTED: mannosyl-oligosaccharide glucosidase GCS1-like isoform X1 [Phoenix dactylifera]
c213572_g1	cluster 2	2.36186	0.000512751	0.00636299	up	1.83804	0.0026041	0.015059	up	-	-	-	-	biological_process:metabolic process(GO:0008152);;cellular_component:membrane(GO:0016020);;molecular_function:hydrolase activity(GO:0016787);;molecular_function:hydrolase activity, acting on glycosyl bonds(GO:0016798);;cellular_component:anchored component of membrane(GO:0031225);;molecular_function:glucan endo-1,3-beta-D-glucosidase activity(GO:0042973);;cellular_component:plasma membrane(GO:000…	mus:103994646|-188.4|K19892|GN4; glucan endo-1,3-beta-glucosidase 4 [EC:3.2.1.39]|ko00500|Starch and sucrose metabolism;;	4641.GSMUA_Achr8P15370_001|-189.1|ENOG410YASF|G|glucan endo-1,3-beta-glucosidase	PF00332.16|Glyco_hydro_17|2.1e-81|Glycosyl hydrolases family 17	Q94CD8|E134_ARATH|-145.3|Glucan endo-1,3-beta-glucosidase 4 OS=Arabidopsis thaliana GN=At3g13560 PE=1 SV=1	ONK65599.1|-206.5|uncharacterized protein A4U43_C07F38740 [Asparagus officinalis]
c218711_g1	cluster 2	1.6794	0.00374412	0.0173906	up	1.36461	0.00715528	0.0271143	up	-	-	-	-	biological_process:metabolic process(GO:0008152);;cellular_component:membrane(GO:0016020);;molecular_function:hydrolase activity(GO:0016787);;molecular_function:hydrolase activity, acting on glycosyl bonds(GO:0016798);;cellular_component:anchored component of membrane(GO:0031225);;molecular_function:glucan endo-1,3-beta-D-glucosidase activity(GO:0042973);;cellular_component:plasma membrane(GO:000…	egu:105046839|-183.3|K19891|GN1_2_3; glucan endo-1,3-beta-glucosidase 1/2/3 [EC:3.2.1.39]|ko00500|Starch and sucrose metabolism;;	4641.GSMUA_Achr4P33420_001|-171.5|ENOG410YEGG|G|glucan endo-1-3-beta-glucosidase	PF00332.16|Glyco_hydro_17|2.4e-67|Glycosyl hydrolases family 17	O65399|E131_ARATH|-157.0|Glucan endo-1,3-beta-glucosidase 1 OS=Arabidopsis thaliana GN=At1g11820 PE=1 SV=3	XP_010923875.1|-182.5|PREDICTED: glucan endo-1,3-beta-glucosidase 1-like [Elaeis guineensis]
c155121_g2	cluster 4	1.636	0.00452682	0.0195224	up	1.27704	0.00950657	0.0323804	up	-	-	-	-	biological_process:metabolic process(GO:0008152);;cellular_component:membrane(GO:0016020);;molecular_function:hydrolase activity(GO:0016787);;molecular_function:hydrolase activity, acting on glycosyl bonds(GO:0016798);;cellular_component:anchored component of membrane(GO:0031225);;molecular_function:glucan endo-1,3-beta-D-glucosidase activity(GO:0042973);;cellular_component:plasma membrane(GO:000…	egu:105048501|-203.2|K19891|GN1_2_3; glucan endo-1,3-beta-glucosidase 1/2/3 [EC:3.2.1.39]|ko00500|Starch and sucrose metabolism;;	29760.VIT_01s0011g05500.t01|-199.8|ENOG410ZF4V|G|glucan endo-1-3-beta-glucosidase	PF00332.16|Glyco_hydro_17|5.5e-76|Glycosyl hydrolases family 17	Q9ZU91|E133_ARATH|-173.2|Glucan endo-1,3-beta-glucosidase 3 OS=Arabidopsis thaliana GN=At2g01630 PE=1 SV=2	XP_020257164.1|-213.0|glucan endo-1,3-beta-glucosidase 3-like [Asparagus officinalis]
c186294_g1	cluster 5	-	-	-	-	2.27526	0.00643481	0.0253581	up	3.38966	0.00287254	0.0393383	up	biological_process:metabolic process(GO:0008152);;molecular_function:hydrolase activity(GO:0016787);;molecular_function:hydrolase activity, acting on glycosyl bonds(GO:0016798);;molecular_function:glucan endo-1,3-beta-D-glucosidase activity(GO:0042973);;cellular_component:extracellular region(GO:0005576);;cellular_component:extracellular region(GO:0005576);;biological_process:defense response(GO:…	-	4641.GSMUA_Achr10P01250_001|-104.0|ENOG410YAHP|G|glucan endo-1-3-beta-glucosidase	PF00332.16|Glyco_hydro_17|2.7e-113|Glycosyl hydrolases family 17	Q8VZJ2|BGNEM_ARATH|-92.4|Probable glucan endo-1,3-beta-glucosidase At4g16260 OS=Arabidopsis thaliana GN=At4g16260 PE=1 SV=1	XP_020274625.1|-103.5|glucan endo-1,3-beta-glucosidase-like [Asparagus officinalis]
c225222_g1	cluster 2	2.52644	0.00193233	0.0120186	up	2.59405	0.00111916	0.0100498	up	1.33981	0.000500687	0.0235817	up	biological_process:protein transport(GO:0015031);;biological_process:peptide transport(GO:0015833);;cellular_component:membrane(GO:0016020);;cellular_component:integral component of membrane(GO:0016021);;cellular_component:plasma membrane(GO:0005886);;cellular_component:plasma membrane(GO:0005886);;biological_process:transport(GO:0006810)	-	4558.Sb07g003690.1|-218.5|COG3104|E|transporter	PF00854.19|PTR2|3e-105|POT family	Q9M390|PTR1_ARATH|-130.1|Protein NRT1/ PTR FAMILY 8.1 OS=Arabidopsis thaliana GN=NPF8.1 PE=1 SV=1	XP_009411558.1|-232.8|PREDICTED: protein NRT1/ PTR FAMILY 6.3-like [Musa acuminata subsp. malaccensis]
c208304_g1	cluster 2	1.56382	0.00457062	0.0196409	up	-	-	-	-	-	-	-	-	biological_process:protein transport(GO:0015031);;biological_process:peptide transport(GO:0015833);;cellular_component:membrane(GO:0016020);;cellular_component:integral component of membrane(GO:0016021);;cellular_component:plasma membrane(GO:0005886);;cellular_component:plasma membrane(GO:0005886);;biological_process:transport(GO:0006810)	-	4555.Si000816m|-254.3|COG3104|E|transporter	PF00854.19|PTR2|4.5e-125|POT family	Q9M390|PTR1_ARATH|-236.4|Protein NRT1/ PTR FAMILY 8.1 OS=Arabidopsis thaliana GN=NPF8.1 PE=1 SV=1	XP_020277202.1|-275.0|protein NRT1/ PTR FAMILY 8.1-like [Asparagus officinalis]
c169637_g1	cluster 1	2.28744	2.48701e-05	0.00319519	up	3.57429	4.10328e-07	0.00105117	up	3.25812	0.000353688	0.0220538	up	biological_process:protein transport(GO:0015031);;biological_process:peptide transport(GO:0015833);;cellular_component:membrane(GO:0016020);;cellular_component:integral component of membrane(GO:0016021);;cellular_component:vacuole(GO:0005773);;cellular_component:vacuolar membrane(GO:0005774);;biological_process:transport(GO:0006810)	-	4081.Solyc02g021240.2.1|-260.3|COG3104|E|transporter	PF00854.19|PTR2|9e-130|POT family	P46032|PTR2_ARATH|-244.5|Protein NRT1/ PTR FAMILY 8.3 OS=Arabidopsis thaliana GN=NPF8.3 PE=1 SV=1	XP_020240747.1|-284.8|protein NRT1/ PTR FAMILY 8.3-like [Asparagus officinalis]
c212989_g1	cluster 2	1.03995	0.00387946	0.0177687	up	1.02887	0.000230943	0.00580433	up	-	-	-	-	biological_process:protein transport(GO:0015031);;biological_process:peptide transport(GO:0015833);;cellular_component:membrane(GO:0016020);;cellular_component:integral component of membrane(GO:0016021);;cellular_component:vacuole(GO:0005773);;cellular_component:vacuolar membrane(GO:0005774);;biological_process:transport(GO:0006810)	-	39946.BGIOSGA011159-PA|-230.2|COG3104|E|transporter	PF00854.19|PTR2|2.9e-125|POT family	P46032|PTR2_ARATH|-212.1|Protein NRT1/ PTR FAMILY 8.3 OS=Arabidopsis thaliana GN=NPF8.3 PE=1 SV=1	XP_020244812.1|-237.5|protein NRT1/ PTR FAMILY 8.3-like isoform X1 [Asparagus officinalis]
c320855_g1	cluster 1	1.14946	0.00438914	0.0191438	up	1.27415	0.00312824	0.0166609	up	-	-	-	-	cellular_component:cell wall(GO:0005618);;biological_process:metabolic process(GO:0008152);;molecular_function:hydrolase activity(GO:0016787);;molecular_function:hydrolase activity, acting on glycosyl bonds(GO:0016798);;molecular_function:glucan endo-1,3-beta-D-glucosidase activity(GO:0042973);;biological_process:cell wall organization(GO:0071555);;cellular_component:extracellular region(GO:00055…	-	3711.Bra011537.1-P|-162.9|ENOG410YAGI|G|glucan endo-1,3-beta-glucosidase	PF00332.16|Glyco_hydro_17|4.8e-85|Glycosyl hydrolases family 17	Q9M069|E137_ARATH|-157.0|Glucan endo-1,3-beta-glucosidase 7 OS=Arabidopsis thaliana GN=At4g34480 PE=1 SV=2	XP_008783477.1|-175.4|PREDICTED: glucan endo-1,3-beta-glucosidase 7 [Phoenix dactylifera]
c228672_g5	cluster 1	4.45319	8.548e-05	0.00375751	up	4.50879	3.15696e-05	0.00394232	up	-	-	-	-	cellular_component:cell wall(GO:0005618);;cellular_component:cell wall(GO:0005618);;biological_process:metabolic process(GO:0008152);;molecular_function:hydrolase activity(GO:0016787);;molecular_function:hydrolase activity, acting on glycosyl bonds(GO:0016798);;molecular_function:beta-fructofuranosidase activity(GO:0004564);;molecular_function:sucrose alpha-glucosidase activity(GO:0004575);;cellu…	cit:102616117|-164.6|K01193|INV, sacA; beta-fructofuranosidase [EC:3.2.1.26]|ko00500|Starch and sucrose metabolism;;ko00052|Galactose metabolism;;	3847.GLYMA10G08670.2|-158.8|COG1621|G|Hydrolase	PF00251.18|Glyco_hydro_32N|9.8e-98|Glycosyl hydrolases family 32 N-terminal domain	Q39693|INV3_DAUCA|-147.0|Beta-fructofuranosidase, insoluble isoenzyme 3 OS=Daucus carota GN=INV3 PE=3 SV=1	BAF93492.1|-210.7|putative cell wall invertase [Asparagus officinalis]
c137593_g1	cluster 2	1.22318	0.00307077	0.0155226	up	-	-	-	-	-	-	-	-	cellular_component:cell wall(GO:0005618);;cellular_component:cell wall(GO:0005618);;biological_process:metabolic process(GO:0008152);;molecular_function:hydrolase activity(GO:0016787);;molecular_function:hydrolase activity, acting on glycosyl bonds(GO:0016798);;molecular_function:beta-fructofuranosidase activity(GO:0004564);;molecular_function:sucrose alpha-glucosidase activity(GO:0004575);;cellu…	pda:103699266|-150.3|K01193|INV, sacA; beta-fructofuranosidase [EC:3.2.1.26]|ko00500|Starch and sucrose metabolism;;ko00052|Galactose metabolism;;	4641.GSMUA_Achr4P29900_001|-146.8|COG1621|G|Hydrolase	PF00251.18|Glyco_hydro_32N|7.3e-90|Glycosyl hydrolases family 32 N-terminal domain	Q39693|INV3_DAUCA|-126.9|Beta-fructofuranosidase, insoluble isoenzyme 3 OS=Daucus carota GN=INV3 PE=3 SV=1	BAF93492.1|-183.9|putative cell wall invertase [Asparagus officinalis]
c156326_g2	cluster 3	-1.44117	0.00517894	0.0212472	down	-1.61016	0.00167453	0.0119048	down	-	-	-	-	cellular_component:cytoplasm(GO:0005737);;cellular_component:cytosol(GO:0005829);;biological_process:carbohydrate metabolic process(GO:0005975);;biological_process:sucrose catabolic process(GO:0005987);;biological_process:metabolic process(GO:0008152);;biological_process:pollen development(GO:0009555);;biological_process:lateral root formation(GO:0010311);;molecular_function:hydrolase activity(GO…	-	4641.GSMUA_Achr5P26040_001|-233.4|ENOG410XPYN|S|glycopeptide alpha-N-acetylgalactosaminidase activity	PF12899.5|Glyco_hydro_100|3.4e-203|Alkaline and neutral invertase	Q69T31|CINV1_ORYSJ|-228.8|Cytosolic invertase 1 OS=Oryza sativa subsp. japonica GN=CINV1 PE=1 SV=1	XP_010256463.1|-232.8|PREDICTED: probable alkaline/neutral invertase D [Nelumbo nucifera]
c228990_g1	cluster 2	2.59226	2.80948e-05	0.00327353	up	2.02909	0.00250863	0.0147519	up	1.47851	0.000328716	0.0218913	up	cellular_component:integral component of membrane(GO:0016021);;biological_process:nitrate assimilation(GO:0042128);;biological_process:transport(GO:0006810);;cellular_component:membrane(GO:0016020);;cellular_component:membrane(GO:0016020)	-	4577.GRMZM5G827496_P01|-199.6|COG3104|E|transporter	PF00854.19|PTR2|1e-95|POT family	Q9SX20|PTR18_ARATH|-174.9|Protein NRT1/ PTR FAMILY 3.1 OS=Arabidopsis thaliana GN=NPF3.1 PE=2 SV=1	XP_020276086.1|-218.1|protein NRT1/ PTR FAMILY 3.1-like [Asparagus officinalis]
c204357_g1	cluster 1	1.7801	0.00160364	0.0108541	up	2.62414	0.00115316	0.0101646	up	2.36288	0.00489064	0.047543	up	cellular_component:integral component of membrane(GO:0016021);;biological_process:transport(GO:0006810);;cellular_component:membrane(GO:0016020);;cellular_component:membrane(GO:0016020)	-	4641.GSMUA_Achr8P20210_001|-173.7|COG3104|E|transporter	PF00854.19|PTR2|7.9e-69|POT family	Q9LFR1|PTR50_ARATH|-134.1|Protein NRT1/ PTR FAMILY 5.8 OS=Arabidopsis thaliana GN=NPF5.8 PE=2 SV=1	XP_020241810.1|-196.0|protein NRT1/ PTR FAMILY 5.8-like [Asparagus officinalis]
c210835_g1	cluster 2	1.36371	0.000217296	0.00457451	up	1.01746	0.000609634	0.00788521	up	-	-	-	-	cellular_component:integral component of membrane(GO:0016021);;biological_process:transport(GO:0006810);;cellular_component:membrane(GO:0016020);;cellular_component:membrane(GO:0016020)	-	29760.VIT_01s0150g00250.t01|-278.6|COG3104|E|transporter	PF00854.19|PTR2|7.1e-82|POT family	Q9LYR6|PTR49_ARATH|-267.9|Protein NRT1/ PTR FAMILY 6.1 OS=Arabidopsis thaliana GN=NPF6.1 PE=2 SV=1	XP_020254405.1|-10000.0|protein NRT1/ PTR FAMILY 6.1 [Asparagus officinalis]
c221437_g1	cluster 5	-	-	-	-	-	-	-	-	-	-	-	-	cellular_component:integral component of membrane(GO:0016021);;biological_process:transport(GO:0006810);;cellular_component:membrane(GO:0016020);;cellular_component:membrane(GO:0016020)	-	4641.GSMUA_Achr1P06320_001|-240.6|COG3104|E|transporter	PF00854.19|PTR2|1.7e-94|POT family	Q3E9B5|PTR51_ARATH|-178.4|Protein NRT1/ PTR FAMILY 7.1 OS=Arabidopsis thaliana GN=NPF7.1 PE=2 SV=1	XP_009395136.1|-248.0|PREDICTED: protein NRT1/ PTR FAMILY 7.3-like [Musa acuminata subsp. malaccensis]
c229656_g3	cluster 1	5.243	8.18553e-06	0.00261227	up	5.14253	1.19704e-05	0.00350478	up	4.78309	1.66858e-05	0.0139355	up	cellular_component:membrane(GO:0016020);;cellular_component:integral component of membrane(GO:0016021);;biological_process:nitrate assimilation(GO:0042128);;biological_process:transport(GO:0006810);;molecular_function:symporter activity(GO:0015293);;cellular_component:membrane(GO:0016020)	-	29760.VIT_12s0059g01240.t01|-227.4|COG3104|E|transporter	PF00854.19|PTR2|1.1e-104|POT family	Q9LVE0|PTR33_ARATH|-223.1|Protein NRT1/ PTR FAMILY 6.4 OS=Arabidopsis thaliana GN=NPF6.4 PE=1 SV=1	XP_010913451.1|-239.1|PREDICTED: protein NRT1/ PTR FAMILY 6.4 [Elaeis guineensis]
c221124_g1	cluster 4	3.00465	0.00599137	0.0231626	up	2.16116	0.0122283	0.0383342	up	-	-	-	-	cellular_component:membrane(GO:0016020);;cellular_component:integral component of membrane(GO:0016021);;cellular_component:vacuole(GO:0005773);;cellular_component:vacuolar membrane(GO:0005774);;biological_process:transport(GO:0006810)	-	4641.GSMUA_Achr11P21010_001|-117.1|COG0580|G|Channel that permits osmotically driven movement of water in both directions. It is involved in the osmoregulation and in the maintenance of cell turgor during volume expansion in rapidly growing cells. It mediates rapid entry or exit of water in response to abrupt changes in osmolarity (By similarity)	PF00230.18|MIP|1.1e-75|Major intrinsic protein	P33560|TIP_ANTMA|-117.0|Probable aquaporin TIP-type OS=Antirrhinum majus GN=DIP PE=2 SV=1	XP_017223603.1|-117.3|PREDICTED: probable aquaporin TIP2-2 [Daucus carota subsp. sativus]
c229094_g1	cluster 2	-	-	-	-	-	-	-	-	-	-	-	-	cellular_component:membrane(GO:0016020);;cellular_component:membrane(GO:0016020);;cellular_component:integral component of membrane(GO:0016021)	-	4641.GSMUA_Achr5P12930_001|-252.9|COG3104|E|transporter	PF00854.19|PTR2|2e-102|POT family	Q9FNL7|PTR3_ARATH|-213.8|Protein NRT1/ PTR FAMILY 5.2 OS=Arabidopsis thaliana GN=NPF5.2 PE=2 SV=1	XP_020259889.1|-277.4|protein NRT1/ PTR FAMILY 5.2-like [Asparagus officinalis]
c228932_g1	cluster 4	2.68912	0.00456589	0.0196394	up	1.7128	0.0162632	0.046248	up	-	-	-	-	cellular_component:plasma membrane(GO:0005886);;cellular_component:plasma membrane(GO:0005886);;biological_process:defense response(GO:0006952);;biological_process:metabolic process(GO:0008152);;cellular_component:membrane(GO:0016020);;molecular_function:hydrolase activity(GO:0016787);;molecular_function:hydrolase activity, acting on glycosyl bonds(GO:0016798);;cellular_component:anchored compone…	-	4513.MLOC_66390.1|-89.4|ENOG41108GU|S|Glycosyl hydrolases family 17	PF00332.16|Glyco_hydro_17|3.4e-66|Glycosyl hydrolases family 17	Q8L868|E1311_ARATH|-79.6|Glucan endo-1,3-beta-glucosidase 11 OS=Arabidopsis thaliana GN=At1g32860 PE=1 SV=1	XP_020692458.1|-98.6|glucan endo-1,3-beta-glucosidase 11-like [Dendrobium catenatum]
c231311_g3	cluster 6	-1.2014	0.000974824	0.0084141	down	-	-	-	-	-	-	-	-	cellular_component:spliceosomal complex(GO:0005681);;biological_process:mRNA processing(GO:0006397);;biological_process:RNA splicing(GO:0008380);;molecular_function:DNA binding(GO:0003677);;cellular_component:nucleus(GO:0005634);;cellular_component:nucleus(GO:0005634)	-	29760.VIT_16s0039g00690.t01|-273.6|ENOG410XP4Y|S|be involved in pre-mRNA splicing (By similarity)	PF07842.10|GCFC|1.4e-84|GC-rich sequence DNA-binding factor-like protein	Q9SLC6|STIP2_ARATH|-172.2|Septin and tuftelin-interacting protein 1 homolog 2 OS=Arabidopsis thaliana GN=STIPL2 PE=2 SV=1	XP_020267982.1|-309.6|septin and tuftelin-interacting protein 1 homolog 1 [Asparagus officinalis]
c176154_g2	cluster 5	-	-	-	-	2.08821	0.00168138	0.0119317	up	3.13322	0.00162482	0.0320296	up	cellular_component:vacuole(GO:0005773);;cellular_component:vacuole(GO:0005773);;biological_process:proteolysis(GO:0006508);;biological_process:vacuolar protein processing(GO:0006624);;molecular_function:peptidase activity(GO:0008233);;molecular_function:cysteine-type peptidase activity(GO:0008234);;biological_process:response to wounding(GO:0009611);;biological_process:response to ethylene(GO:000…	-	4641.GSMUA_Achr6P35740_001|-66.6|COG5206|O|phosphatidylinositol glycan anchor biosynthesis, class K	-	Q39119|VPEG_ARATH|-63.7|Vacuolar-processing enzyme gamma-isozyme OS=Arabidopsis thaliana GN=At4g32940 PE=2 SV=2	XP_010911246.1|-67.0|PREDICTED: vacuolar-processing enzyme [Elaeis guineensis]
c176154_g3	cluster 5	1.16015	0.0142846	0.0413031	up	2.43657	0.00264238	0.0152046	up	3.18172	0.00101379	0.0277191	up	molecular_function:hydrolase activity(GO:0016787);;biological_process:proteolysis(GO:0006508);;molecular_function:peptidase activity(GO:0008233);;molecular_function:cysteine-type peptidase activity(GO:0008234)	-	4641.GSMUA_Achr6P35740_001|-114.4|COG5206|O|phosphatidylinositol glycan anchor biosynthesis, class K	-	P49043|VPE_CITSI|-101.3|Vacuolar-processing enzyme OS=Citrus sinensis PE=2 SV=1	XP_020265168.1|-116.2|vacuolar-processing enzyme-like [Asparagus officinalis]
c200027_g3	cluster 5	-	-	-	-	-	-	-	-	1.03928	0.00373724	0.0430896	up	molecular_function:hydrolase activity(GO:0016787);;biological_process:proteolysis(GO:0006508);;molecular_function:peptidase activity(GO:0008233);;molecular_function:cysteine-type peptidase activity(GO:0008234)	-	4641.GSMUA_Achr6P35740_001|-215.0|COG5206|O|phosphatidylinositol glycan anchor biosynthesis, class K	PF01650.16|Peptidase_C13|5.5e-110|Peptidase C13 family	P49043|VPE_CITSI|-200.3|Vacuolar-processing enzyme OS=Citrus sinensis PE=2 SV=1	XP_020265168.1|-228.8|vacuolar-processing enzyme-like [Asparagus officinalis]
c218383_g2	cluster 2	2.11262	0.000349171	0.00543219	up	2.00342	0.000437487	0.00700535	up	-	-	-	-	molecular_function:hydrolase activity, acting on glycosyl bonds(GO:0016798);;molecular_function:glucan endo-1,3-beta-D-glucosidase activity(GO:0042973);;biological_process:defense response(GO:0006952);;biological_process:metabolic process(GO:0008152);;molecular_function:hydrolase activity(GO:0016787)	-	29760.VIT_13s0019g01180.t01|-147.5|ENOG410YCVQ|G|glucan endo-1-3-beta-glucosidase	PF00332.16|Glyco_hydro_17|9.1e-81|Glycosyl hydrolases family 17	P52409|E13B_WHEAT|-135.0|Glucan endo-1,3-beta-glucosidase OS=Triticum aestivum GN=GLC1 PE=2 SV=1	XP_008802734.1|-158.6|PREDICTED: glucan endo-1,3-beta-glucosidase [Phoenix dactylifera]
c195036_g1	cluster 2	2.04701	0.00685587	0.0252979	up	-	-	-	-	-	-	-	-	molecular_function:hydrolase activity, acting on glycosyl bonds(GO:0016798);;molecular_function:glucan endo-1,3-beta-D-glucosidase activity(GO:0042973);;biological_process:defense response(GO:0006952);;biological_process:metabolic process(GO:0008152);;molecular_function:hydrolase activity(GO:0016787)	-	4113.PGSC0003DMT400037216|-111.4|ENOG410YFZD|G|beta-1,3-glucanase	PF00332.16|Glyco_hydro_17|2.9e-115|Glycosyl hydrolases family 17	Q02439|E13F_HORVU|-105.4|Putative glucan endo-1,3-beta-glucosidase GVI (Fragment) OS=Hordeum vulgare PE=3 SV=1	XP_020276498.1|-136.6|putative glucan endo-1,3-beta-glucosidase GVI [Asparagus officinalis]
c178982_g1	cluster 1	1.43054	0.00249285	0.0137584	up	1.80652	0.000732474	0.00838499	up	1.87523	0.00073799	0.0254521	up	molecular_function:hydrolase activity, acting on glycosyl bonds(GO:0016798);;molecular_function:scopolin beta-glucosidase activity(GO:0102483);;biological_process:metabolic process(GO:0008152);;molecular_function:beta-glucosidase activity(GO:0008422);;molecular_function:hydrolase activity(GO:0016787)	egu:105035046|-215.7|K01188|E3.2.1.21; beta-glucosidase [EC:3.2.1.21]|ko00940|Phenylpropanoid biosynthesis;;ko00460|Cyanoamino acid metabolism;;ko00500|Starch and sucrose metabolism;;	4641.GSMUA_Achr3P21660_001|-208.6|COG2723|G|beta-glucosidase	PF00232.16|Glyco_hydro_1|1.7e-172|Glycosyl hydrolase family 1	Q5N863|BGL04_ORYSJ|-199.4|Beta-glucosidase 4 OS=Oryza sativa subsp. japonica GN=BGLU4 PE=2 SV=1	XP_010908744.1|-214.9|PREDICTED: beta-glucosidase 4 isoform X1 [Elaeis guineensis]
c215382_g2	cluster 1	3.55427	6.05521e-05	0.00355789	up	3.65694	0.000327435	0.00637884	up	3.51213	0.000451275	0.023001	up	molecular_function:lyase activity(GO:0016829);;molecular_function:pectate lyase activity(GO:0030570);;cellular_component:anchored component of membrane(GO:0031225);;biological_process:pectin catabolic process(GO:0045490);;molecular_function:metal ion binding(GO:0046872);;cellular_component:plasma membrane(GO:0005886);;cellular_component:plasma membrane(GO:0005886);;cellular_component:membrane(GO:…	pda:103717730|-155.4|K01728|pel; pectate lyase [EC:4.2.2.2]|ko00040|Pentose and glucuronate interconversions;;	4558.Sb01g020180.1|-152.6|COG3866|G|pectate lyase activity	-	Q93Z04|PLY13_ARATH|-152.3|Probable pectate lyase 13 OS=Arabidopsis thaliana GN=PMR6 PE=1 SV=1	XP_018821302.1|-156.1|PREDICTED: probable pectate lyase 18 isoform X1 [Juglans regia]
c193411_g2	cluster 1	4.5817	0.000335085	0.00535776	up	5.11951	0.00137709	0.010934	up	3.68024	0.000677885	0.0251561	up	molecular_function:metal ion binding(GO:0046872);;molecular_function:lyase activity(GO:0016829);;molecular_function:pectate lyase activity(GO:0030570);;biological_process:pectin catabolic process(GO:0045490)	gra:105794575|-178.6|K01728|pel; pectate lyase [EC:4.2.2.2]|ko00040|Pentose and glucuronate interconversions;;	3694.POPTR_0008s18250.1|-179.8|COG3866|G|pectate lyase activity	-	Q93Z25|PLY22_ARATH|-174.4|Probable pectate lyase 22 OS=Arabidopsis thaliana GN=At5g63180 PE=2 SV=1	XP_011029589.1|-178.1|PREDICTED: probable pectate lyase 5 [Populus euphratica]
c211032_g1	cluster 2	6.90355	0.000593424	0.0067786	up	5.78401	0.000609551	0.00788521	up	-	-	-	-	molecular_function:metal ion binding(GO:0046872);;molecular_function:lyase activity(GO:0016829);;molecular_function:pectate lyase activity(GO:0030570);;biological_process:pectin catabolic process(GO:0045490)	egu:105043158|-220.5|K01728|pel; pectate lyase [EC:4.2.2.2]|ko00040|Pentose and glucuronate interconversions;;	15368.BRADI5G01135.1|-210.5|COG3866|G|pectate lyase activity	-	Q944R1|PLY15_ARATH|-194.3|Probable pectate lyase 15 OS=Arabidopsis thaliana GN=At4g13710 PE=2 SV=1	XP_010918895.1|-219.7|PREDICTED: probable pectate lyase 8 isoform X1 [Elaeis guineensis]
c207990_g2	cluster 2	5.89645	0.000824714	0.00782525	up	6.06557	0.000341488	0.00648013	up	-	-	-	-	molecular_function:metal ion binding(GO:0046872);;molecular_function:lyase activity(GO:0016829);;molecular_function:pectate lyase activity(GO:0030570);;biological_process:pectin catabolic process(GO:0045490)	egu:105043158|-66.3|K01728|pel; pectate lyase [EC:4.2.2.2]|ko00040|Pentose and glucuronate interconversions;;	4641.GSMUA_Achr7P04580_001|-62.5|COG3866|G|pectate lyase activity	-	Q9M8Z8|PLY8_ARATH|-56.1|Probable pectate lyase 8 OS=Arabidopsis thaliana GN=At3g07010 PE=2 SV=1	XP_010918895.1|-65.6|PREDICTED: probable pectate lyase 8 isoform X1 [Elaeis guineensis]
c207990_g1	cluster 2	5.82312	0.000650845	0.00706616	up	5.66409	0.000299958	0.00631704	up	-	-	-	-	molecular_function:metal ion binding(GO:0046872);;molecular_function:lyase activity(GO:0016829);;molecular_function:pectate lyase activity(GO:0030570);;biological_process:pectin catabolic process(GO:0045490)	egu:105043158|-141.4|K01728|pel; pectate lyase [EC:4.2.2.2]|ko00040|Pentose and glucuronate interconversions;;	4641.GSMUA_Achr11P21910_001|-142.0|COG3866|G|pectate lyase activity	-	Q944R1|PLY15_ARATH|-130.2|Probable pectate lyase 15 OS=Arabidopsis thaliana GN=At4g13710 PE=2 SV=1	XP_020260000.1|-141.1|LOW QUALITY PROTEIN: probable pectate lyase 15 [Asparagus officinalis]
c207568_g1	cluster 1	4.37706	2.75792e-05	0.0032645	up	3.25221	0.00541773	0.0229433	up	2.04148	0.0014733	0.0309928	up	molecular_function:symporter activity(GO:0015293);;cellular_component:membrane(GO:0016020);;cellular_component:integral component of membrane(GO:0016021);;biological_process:nitrate assimilation(GO:0042128);;cellular_component:plasma membrane(GO:0005886);;cellular_component:plasma membrane(GO:0005886);;biological_process:transport(GO:0006810)	-	39946.BGIOSGA030457-PA|-10000.0|ENOG410XS4D|S|Retrotransposon protein	PF07727.12|RVT_2|1.8e-101|Reverse transcriptase (RNA-dependent DNA polymerase)	Q8RX77|PTR21_ARATH|-153.3|Protein NRT1/ PTR FAMILY 2.13 OS=Arabidopsis thaliana GN=NPF2.13 PE=1 SV=1	XP_020275842.1|-219.4|protein NRT1/ PTR FAMILY 2.11-like [Asparagus officinalis]
c214187_g1	cluster 1	2.37806	0.000871602	0.00800819	up	1.94977	0.00537483	0.0228455	up	1.65277	0.00401458	0.0443936	up	molecular_function:symporter activity(GO:0015293);;cellular_component:membrane(GO:0016020);;cellular_component:integral component of membrane(GO:0016021);;biological_process:nitrate assimilation(GO:0042128);;cellular_component:plasma membrane(GO:0005886);;cellular_component:plasma membrane(GO:0005886);;biological_process:transport(GO:0006810)	-	4533.OB01G50250.1|-191.5|COG3104|E|transporter	PF00854.19|PTR2|6.7e-88|POT family	Q8RX77|PTR21_ARATH|-165.1|Protein NRT1/ PTR FAMILY 2.13 OS=Arabidopsis thaliana GN=NPF2.13 PE=1 SV=1	XP_020257111.1|-244.5|protein NRT1/ PTR FAMILY 2.13-like [Asparagus officinalis]
c225186_g1	cluster 3	-4.69123	7.85983e-06	0.00261227	down	-5.41634	9.47956e-06	0.00336618	down	-5.16542	8.91087e-05	0.0188437	down	molecular_function:protein binding(GO:0005515);;molecular_function:protein binding(GO:0005515);;molecular_function:ATP binding(GO:0005524);;cellular_component:cytoplasm(GO:0005737);;cellular_component:cytoplasm(GO:0005737);;biological_process:defense response(GO:0006952);;biological_process:defense response to bacterium, incompatible interaction(GO:0009816);;biological_process:innate immune respo…	pda:103715800|-10000.0|K04079|HSP90A, htpG; molecular chaperone HtpG|ko04141|Protein processing in endoplasmic reticulum;;ko04626|Plant-pathogen interaction;;	3702.AT5G52640.1|-10000.0|COG0326|O|Molecular chaperone. Has ATPase activity (By similarity)	PF00183.16|HSP90|4.1e-207|Hsp90 protein	P27323|HS901_ARATH|-10000.0|Heat shock protein 90-1 OS=Arabidopsis thaliana GN=HSP90-1 PE=1 SV=3	XP_008801780.1|-10000.0|PREDICTED: heat shock protein 83 [Phoenix dactylifera]
c89997_g1	cluster 3	-4.78087	3.71635e-05	0.00334192	down	-5.4422	1.48415e-05	0.00363332	down	-5.59936	0.000110653	0.0192641	down	cellular_component:chloroplast(GO:0009507);;cellular_component:chloroplast(GO:0009507);;cellular_component:plastid(GO:0009536)	pda:103722921|-68.3|K13993|HSP20; HSP20 family protein|ko04141|Protein processing in endoplasmic reticulum;;	4558.Sb01g041180.1|-63.7|COG0071|O|response to heat	-	Q00445|HS21C_WHEAT|-60.6|Small heat shock protein, chloroplastic OS=Triticum aestivum GN=HSP21 PE=2 SV=1	AFP96754.1|-81.2|chloroplast small heat shock protein [Agave americana]
c209040_g2	cluster 3	-5.02574	9.50139e-06	0.00274111	down	-6.46884	9.13023e-05	0.00456079	down	-6.82589	0.000834426	0.0264334	down	cellular_component:cytoplasm(GO:0005737);;cellular_component:cytoplasm(GO:0005737)	sind:105167109|-61.4|K13993|HSP20; HSP20 family protein|ko04141|Protein processing in endoplasmic reticulum;;	3694.POPTR_0008s06260.1|-60.9|COG0071|O|response to heat	-	P27880|HSP12_MEDSA|-60.0|18.2 kDa class I heat shock protein OS=Medicago sativa GN=HSP18.2 PE=2 SV=1	ABF61863.1|-63.5|chaperone [Agave tequilana]
c126221_g1	cluster 1	3.32191	0.000319709	0.0052406	up	3.41334	0.00036641	0.0066076	up	3.02242	0.00178377	0.0328888	up	cellular_component:plastid(GO:0009536);;molecular_function:oxidoreductase activity(GO:0016491);;biological_process:oxidation-reduction process(GO:0055114);;molecular_function:phosphoglycerate dehydrogenase activity(GO:0004617);;cellular_component:chloroplast(GO:0009507);;cellular_component:chloroplast(GO:0009507)	egu:105049537|-265.4|K00058|serA, PHGDH; D-3-phosphoglycerate dehydrogenase [EC:1.1.1.95]|ko00260|Glycine, serine and threonine metabolism;;ko01200|Carbon metabolism;;ko01230|Biosynthesis of amino acids;;	29760.VIT_03s0180g00130.t01|-265.7|COG0111|E|Dehydrogenase	PF02826.17|2-Hacid_dh_C|9.4e-62|D-isomer specific 2-hydroxyacid dehydrogenase, NAD binding domain	O49485|SERA1_ARATH|-257.6|D-3-phosphoglycerate dehydrogenase 1, chloroplastic OS=Arabidopsis thaliana GN=PGDH1 PE=1 SV=1	OAY77085.1|-268.8|D-3-phosphoglycerate dehydrogenase 1, chloroplastic, partial [Ananas comosus]
c183170_g1	cluster 3	-4.02323	0.000113799	0.00399233	down	-5.45734	2.17632e-05	0.00376599	down	-5.90577	2.68845e-05	0.0160564	down	biological_process:glutathione biosynthetic process(GO:0006750);;biological_process:glutathione biosynthetic process(GO:0006750);;cellular_component:chloroplast(GO:0009507);;cellular_component:chloroplast(GO:0009507);;cellular_component:plastid(GO:0009536);;molecular_function:ligase activity(GO:0016874);;molecular_function:nucleotide binding(GO:0000166);;molecular_function:glutamate-cysteine liga…	thj:104806388|-149.3|K01919|gshA; glutamate--cysteine ligase [EC:6.3.2.2]|ko00480|Glutathione metabolism;;ko00270|Cysteine and methionine metabolism;;	4558.Sb09g002470.1|-149.6|COG3572|H|glutamate--cysteine ligase	PF04107.11|GCS2|4.9e-81|Glutamate-cysteine ligase family 2(GCS2)	Q1W2L8|GSH1_TOBAC|-151.4|Glutamate--cysteine ligase, chloroplastic OS=Nicotiana tabacum GN=GSH1 PE=2 SV=2	XP_011022699.1|-149.5|PREDICTED: glutamate--cysteine ligase, chloroplastic-like [Populus euphratica]
c197215_g1	cluster 3	-3.34035	0.000840678	0.00789493	down	-4.0284	0.00108273	0.00988416	down	-4.11036	0.000711751	0.0252622	down	biological_process:abscisic acid biosynthetic process(GO:0009688);;molecular_function:oxidoreductase activity(GO:0016491);;molecular_function:9-cis-epoxycarotenoid dioxygenase activity(GO:0045549);;molecular_function:metal ion binding(GO:0046872);;molecular_function:dioxygenase activity(GO:0051213);;biological_process:oxidation-reduction process(GO:0055114);;cellular_component:chloroplast(GO:0009…	pda:103705744|-251.2|K09840|NCED; 9-cis-epoxycarotenoid dioxygenase [EC:1.13.11.51]|ko00906|Carotenoid biosynthesis;;	4641.GSMUA_Achr5P02570_001|-241.9|COG3670|Q|dioxygenase	PF03055.13|RPE65|1.7e-106|Retinal pigment epithelial membrane protein	C3VEQ3|NCED_ONCHC|-232.2|9-cis-epoxycarotenoid dioxygenase, chloroplastic OS=Oncidium hybrid cultivar GN=NCED PE=2 SV=1	XP_008787808.1|-250.4|PREDICTED: 9-cis-epoxycarotenoid dioxygenase, chloroplastic-like [Phoenix dactylifera]
c224948_g1	cluster 3	-2.08368	7.02182e-05	0.00359689	down	-2.32022	1.21281e-05	0.00350478	down	-2.09401	0.000462306	0.0231662	down	cellular_component:plastid(GO:0009536);;cellular_component:chloroplast thylakoid lumen(GO:0009543);;cellular_component:thylakoid(GO:0009579);;molecular_function:isomerase activity(GO:0016853);;molecular_function:peptidyl-prolyl cis-trans isomerase activity(GO:0003755);;molecular_function:peptidyl-prolyl cis-trans isomerase activity(GO:0003755);;cellular_component:chloroplast(GO:0009507)	-	4641.GSMUA_Achr4P03970_001|-58.4|COG0545|O|Peptidyl-prolyl cis-trans isomerase	-	Q944B0|FK161_ARATH|-55.5|Peptidyl-prolyl cis-trans isomerase FKBP16-1, chloroplastic OS=Arabidopsis thaliana GN=FKBP16-1 PE=2 SV=1	XP_020241435.1|-63.1|peptidyl-prolyl cis-trans isomerase FKBP16-1, chloroplastic isoform X1 [Asparagus officinalis]
c210373_g1	cluster 1	4.57988	3.14227e-05	0.00328995	up	4.08473	0.00016461	0.00524102	up	3.33609	0.000701092	0.0252622	up	biological_process:photorespiration(GO:0009853);;biological_process:photorespiration(GO:0009853);;cellular_component:chloroplast envelope(GO:0009941);;cellular_component:membrane(GO:0016020);;cellular_component:integral component of membrane(GO:0016021);;cellular_component:chloroplast membrane(GO:0031969);;molecular_function:glycolate transmembrane transporter activity(GO:0043879);;biological_pro…	-	4081.Solyc08g076290.2.1|-196.2|COG1346|M|cytolysis	-	Q9FVQ4|PLGG1_ARATH|-189.1|Plastidal glycolate/glycerate translocator 1, chloroplastic OS=Arabidopsis thaliana GN=PLGG1 PE=1 SV=1	ONK71540.1|-205.7|uncharacterized protein A4U43_C04F9690 [Asparagus officinalis]
c101316_g1	cluster 1	2.27447	1.11329e-05	0.00296145	up	2.06002	0.000184719	0.00543737	up	1.38391	0.00321256	0.0407484	up	cellular_component:nucleus(GO:0005634);;biological_process:transcription, DNA-templated(GO:0006351);;biological_process:regulation of transcription, DNA-templated(GO:0006355);;biological_process:defense response(GO:0006952);;cellular_component:chloroplast(GO:0009507);;cellular_component:chloroplast(GO:0009507);;cellular_component:plastid(GO:0009536);;molecular_function:sequence-specific DNA bindi…	-	4641.GSMUA_Achr10P21100_001|-84.1|ENOG41124UZ|K|Single-stranded DNA-binding protein that functions in both chloroplasts and nucleus. In chloroplasts, maintains plastid genome stability by preventing break-induced and short homology- dependent illegitimate recombinations. In	-	Q9LL85|WHY1_SOLTU|-80.3|Single-stranded DNA-binding protein WHY1, chloroplastic OS=Solanum tuberosum GN=WHY1 PE=1 SV=1	XP_020250602.1|-97.0|single-stranded DNA-binding protein WHY1, chloroplastic-like isoform X1 [Asparagus officinalis]
c101657_g1	cluster 1	-	-	-	-	1.30689	0.000633629	0.00797741	up	1.48117	0.00379556	0.0433585	up	cellular_component:chloroplast(GO:0009507);;cellular_component:plastid(GO:0009536);;cellular_component:membrane(GO:0016020);;cellular_component:integral component of membrane(GO:0016021);;cellular_component:chloroplast membrane(GO:0031969);;molecular_function:protein binding(GO:0005515);;cellular_component:nucleus(GO:0005634);;cellular_component:nucleus(GO:0005634)	-	4641.GSMUA_Achr11P00320_001|-139.1|ENOG4110IJH|S|NA	-	Q9FKF4|ORANG_ARATH|-127.0|Protein ORANGE, chloroplastic OS=Arabidopsis thaliana GN=OR PE=1 SV=1	XP_009381947.1|-137.0|PREDICTED: uncharacterized protein LOC103970041 isoform X1 [Musa acuminata subsp. malaccensis]
c102055_g1	cluster 1	2.03714	0.000227587	0.00465264	up	2.08811	0.000902922	0.00916854	up	-	-	-	-	biological_process:chorismate biosynthetic process(GO:0009423);;cellular_component:chloroplast(GO:0009507);;cellular_component:chloroplast(GO:0009507);;cellular_component:plastid(GO:0009536);;biological_process:response to herbicide(GO:0009635);;molecular_function:transferase activity(GO:0016740);;molecular_function:3-phosphoshikimate 1-carboxyvinyltransferase activity(GO:0003866);;biological_pro…	mus:103970764|-228.9|K00800|aroA; 3-phosphoshikimate 1-carboxyvinyltransferase [EC:2.5.1.19]|ko01230|Biosynthesis of amino acids;;ko00400|Phenylalanine, tyrosine and tryptophan biosynthesis;;	4641.GSMUA_Achr2P03220_001|-230.1|COG0128|E|5-enolpyruvylshikimate-3-phosphate synthase	PF00275.18|EPSP_synthase|3.2e-146|EPSP synthase (3-phosphoshikimate 1-carboxyvinyltransferase)	P11043|AROA_PETHY|-219.5|3-phosphoshikimate 1-carboxyvinyltransferase, chloroplastic OS=Petunia hybrida PE=1 SV=1	ABE77393.4|-270.6|EPSP synthase [Allium macrostemon]
c102154_g1	cluster 2	1.35433	0.000588326	0.00676661	up	-	-	-	-	-	-	-	-	-	-	-	-	-	-
c102210_g2	cluster 4	2.05428	0.00014898	0.00416867	up	1.35206	0.0028699	0.015907	up	-	-	-	-	-	-	4641.GSMUA_Achr8P21860_001|-98.2|ENOG4111J4M|S|Photosystem I assembly related protein	-	-	XP_020245190.1|-99.6|uncharacterized protein ycf37 isoform X1 [Asparagus officinalis]
c102274_g1	cluster 4	1.56074	0.00122899	0.00948415	up	1.29762	0.000439493	0.00701879	up	-	-	-	-	molecular_function:oxidoreductase activity(GO:0016491);;biological_process:nitrate assimilation(GO:0042128);;biological_process:nitrate assimilation(GO:0042128);;molecular_function:metal ion binding(GO:0046872);;molecular_function:ferredoxin-nitrite reductase activity(GO:0048307);;molecular_function:iron-sulfur cluster binding(GO:0051536);;molecular_function:4 iron, 4 sulfur cluster binding(GO:00…	mus:103997993|-273.6|K00366|nirA; ferredoxin-nitrite reductase [EC:1.7.7.1]|ko00910|Nitrogen metabolism;;	4641.GSMUA_Achr9P15320_001|-274.8|COG0155|C|Component of the sulfite reductase complex that catalyzes the 6-electron reduction of sulfite to sulfide. This is one of several activities required for the biosynthesis of L- cysteine from sulfate (By similarity)	-	P17847|NIR_MAIZE|-260.9|Ferredoxin--nitrite reductase, chloroplastic (Fragment) OS=Zea mays GN=NIR PE=2 SV=1	XP_020271095.1|-276.6|ferredoxin--nitrite reductase, chloroplastic, partial [Asparagus officinalis]
c104972_g1	cluster 3	-1.82294	0.00135517	0.00991897	down	-1.89603	0.00153655	0.0114929	down	-1.76402	0.00318564	0.0405612	down	-	-	4641.GSMUA_Achr1P10150_001|-51.0|COG0484|O|ATP binding to DnaK triggers the release of the substrate protein, thus completing the reaction cycle. Several rounds of ATP-dependent interactions between DnaJ, DnaK and GrpE are required for fully efficient folding. Also involved, together with DnaK and GrpE, in the DNA replication of plasmids through activation of initiation proteins (By similarity)	-	-	XP_009396818.1|-50.3|PREDICTED: chaperone protein dnaJ 8, chloroplastic-like [Musa acuminata subsp. malaccensis]
c108834_g2	cluster 1	2.22132	6.8634e-05	0.00358151	up	2.17666	4.41299e-06	0.00306313	up	-	-	-	-	cellular_component:chloroplast(GO:0009507);;cellular_component:plastid(GO:0009536);;molecular_function:transferase activity(GO:0016740);;biological_process:riboflavin biosynthetic process(GO:0009231);;biological_process:riboflavin biosynthetic process(GO:0009231);;cellular_component:chloroplast(GO:0009507)	egu:105051526|-74.1|K00794|ribH, RIB4; 6,7-dimethyl-8-ribityllumazine synthase [EC:2.5.1.78]|ko00740|Riboflavin metabolism;;	4555.Si011041m|-70.7|COG0054|H|Catalyzes the formation of 6,7-dimethyl-8- ribityllumazine by condensation of 5-amino-6-(D- ribitylamino)uracil with 3,4-dihydroxy-2-butanone 4-phosphate. This is the penultimate step in the biosynthesis of riboflavin (By similarity)	-	O80575|RISB_ARATH|-70.5|6,7-dimethyl-8-ribityllumazine synthase, chloroplastic OS=Arabidopsis thaliana GN=At2g44050 PE=2 SV=1	XP_020249864.1|-81.1|6,7-dimethyl-8-ribityllumazine synthase, chloroplastic-like [Asparagus officinalis]
c108871_g1	cluster 1	1.06866	6.23744e-05	0.00355885	up	1.75538	1.45741e-05	0.00363332	up	1.95272	0.000911136	0.0268931	up	cellular_component:chloroplast(GO:0009507);;cellular_component:chloroplast(GO:0009507);;cellular_component:plastid(GO:0009536);;molecular_function:hydrolase activity(GO:0016787);;molecular_function:manganese ion binding(GO:0030145);;molecular_function:metal ion binding(GO:0046872);;molecular_function:aminopeptidase activity(GO:0004177);;biological_process:proteolysis(GO:0006508);;molecular_functi…	egu:105050732|-235.4|K01255|CARP, pepA; leucyl aminopeptidase [EC:3.4.11.1]|ko00480|Glutathione metabolism;;	4641.GSMUA_Achr8P24810_001|-230.9|COG0260|E|Presumably involved in the processing and regular turnover of intracellular proteins. Catalyzes the removal of unsubstituted N-terminal amino acids from various peptides (By similarity)	PF00883.19|Peptidase_M17|3.4e-115|Cytosol aminopeptidase family, catalytic domain	Q6K669|AMPL2_ORYSJ|-229.6|Leucine aminopeptidase 2, chloroplastic OS=Oryza sativa subsp. japonica GN=Os02g0794700 PE=2 SV=1	XP_020268593.1|-235.2|LOW QUALITY PROTEIN: leucine aminopeptidase 2, chloroplastic-like [Asparagus officinalis]
c109718_g1	cluster 2	1.74179	0.000475646	0.00618318	up	1.61937	4.42318e-05	0.00403179	up	-	-	-	-	-	-	-	-	-	-
c109744_g1	cluster 2	1.01166	0.000354953	0.0054619	up	-	-	-	-	-	-	-	-	biological_process:oxidation-reduction process(GO:0055114);;cellular_component:chloroplast(GO:0009507);;cellular_component:chloroplast(GO:0009507);;cellular_component:plastid(GO:0009536)	-	4641.GSMUA_Achr8P05590_001|-77.4|ENOG410XQYV|S|exostoses (multiple)-like 2	-	Q5TKD8|TRL2_ORYSJ|-70.8|Thioredoxin-like 2, chloroplastic OS=Oryza sativa subsp. japonica GN=Os05g0200100 PE=2 SV=1	XP_020251035.1|-86.5|thioredoxin-like 2, chloroplastic isoform X1 [Asparagus officinalis]
c110032_g1	cluster 1	2.59668	1.84698e-05	0.00319519	up	2.64055	2.48979e-05	0.00385486	up	1.9387	0.000425096	0.0228341	up	biological_process:glycolytic process(GO:0006096);;biological_process:glycolytic process(GO:0006096);;cellular_component:chloroplast(GO:0009507);;cellular_component:plastid(GO:0009536);;cellular_component:chloroplast stroma(GO:0009570);;molecular_function:isomerase activity(GO:0016853);;molecular_function:glucose-6-phosphate isomerase activity(GO:0004347);;biological_process:gluconeogenesis(GO:00…	gmx:100818441|-127.6|K01810|GPI, pgi; glucose-6-phosphate isomerase [EC:5.3.1.9]|ko01200|Carbon metabolism;;ko00520|Amino sugar and nucleotide sugar metabolism;;ko00030|Pentose phosphate pathway;;ko00500|Starch and sucrose metabolism;;ko00010|Glycolysis / Gluconeogenesis;;	3847.GLYMA06G09880.1|-128.8|COG0166|G|glucose-6-phosphate isomerase activity	-	Q8H103|G6PIP_ARATH|-125.1|Glucose-6-phosphate isomerase 1, chloroplastic OS=Arabidopsis thaliana GN=PGI1 PE=1 SV=1	KHN09015.1|-126.8|Glucose-6-phosphate isomerase [Glycine soja]
c110032_g2	cluster 1	1.78994	0.00121969	0.00945044	up	2.19722	0.000277998	0.00618894	up	1.67243	0.00474788	0.0471253	up	biological_process:glycolytic process(GO:0006096);;biological_process:glycolytic process(GO:0006096);;cellular_component:chloroplast(GO:0009507);;cellular_component:plastid(GO:0009536);;cellular_component:chloroplast stroma(GO:0009570);;molecular_function:isomerase activity(GO:0016853);;molecular_function:glucose-6-phosphate isomerase activity(GO:0004347);;biological_process:gluconeogenesis(GO:00…	pop:POPTR_0002s10420g|-83.5|K01810|GPI, pgi; glucose-6-phosphate isomerase [EC:5.3.1.9]|ko01200|Carbon metabolism;;ko00520|Amino sugar and nucleotide sugar metabolism;;ko00030|Pentose phosphate pathway;;ko00500|Starch and sucrose metabolism;;ko00010|Glycolysis / Gluconeogenesis;;	3694.POPTR_0002s10420.1|-84.6|COG0166|G|glucose-6-phosphate isomerase activity	-	Q8H103|G6PIP_ARATH|-82.6|Glucose-6-phosphate isomerase 1, chloroplastic OS=Arabidopsis thaliana GN=PGI1 PE=1 SV=1	XP_019156409.1|-84.0|PREDICTED: glucose-6-phosphate isomerase 1, chloroplastic [Ipomoea nil]
c111203_g1	cluster 1	1.19406	0.0020048	0.0122417	up	1.07317	0.00237991	0.0143063	up	1.46777	9.0395e-05	0.0188437	up	cellular_component:chloroplast(GO:0009507);;cellular_component:plastid(GO:0009536);;molecular_function:rRNA binding(GO:0019843);;cellular_component:intracellular ribonucleoprotein complex(GO:0030529);;molecular_function:RNA binding(GO:0003723);;cellular_component:ribosome(GO:0005840);;cellular_component:chloroplast(GO:0009507)	jcu:105637048|-77.2|K02864|RP-L10, MRPL10, rplJ; large subunit ribosomal protein L10|ko03010|Ribosome;;	3711.Bra008824.1-P|-77.4|COG0244|J|50s ribosomal protein L10	-	O80362|RK10_TOBAC|-78.0|50S ribosomal protein L10, chloroplastic OS=Nicotiana tabacum GN=RPL10 PE=2 SV=1	XP_020276821.1|-79.5|50S ribosomal protein L10, chloroplastic [Asparagus officinalis]
c114285_g1	cluster 4	1.39439	0.00161561	0.0109023	up	-	-	-	-	-	-	-	-	cellular_component:plastid(GO:0009536);;cellular_component:intracellular ribonucleoprotein complex(GO:0030529);;cellular_component:ribosome(GO:0005840);;cellular_component:chloroplast(GO:0009507);;cellular_component:chloroplast(GO:0009507)	mdm:103413177|-62.6|K02946|RP-S10, MRPS10, rpsJ; small subunit ribosomal protein S10|ko03010|Ribosome;;	3694.POPTR_0001s37430.1|-61.5|COG0051|J|tRNA binding	-	Q9LK61|RR10_ARATH|-60.7|30S ribosomal protein S10, chloroplastic OS=Arabidopsis thaliana GN=RPS10 PE=2 SV=1	XP_015865689.1|-63.9|PREDICTED: 30S ribosomal protein S10, chloroplastic [Ziziphus jujuba]
c125076_g1	cluster 1	1.81976	0.000669757	0.0071458	up	1.39975	0.00174281	0.0121518	up	1.18962	0.00466067	0.0469019	up	-	-	-	-	-	XP_020246281.1|-51.6|thioredoxin Y, chloroplastic-like [Asparagus officinalis]
c126116_g1	cluster 4	1.23916	0.000519405	0.00640588	up	-	-	-	-	-	-	-	-	cellular_component:nucleus(GO:0005634);;cellular_component:nucleus(GO:0005634);;cellular_component:cytoplasm(GO:0005737);;cellular_component:cytoplasm(GO:0005737);;molecular_function:lipid binding(GO:0008289);;cellular_component:chloroplast(GO:0009507);;cellular_component:plastid outer membrane(GO:0009527);;cellular_component:plastid(GO:0009536);;cellular_component:chloroplast outer membrane(GO:0…	-	3847.GLYMA04G12950.1|-135.1|COG0666|S|Ankyrin Repeat	-	Q29Q26|AKR2B_ARATH|-116.7|Ankyrin repeat domain-containing protein 2B OS=Arabidopsis thaliana GN=AKR2B PE=1 SV=1	XP_020261230.1|-148.1|ankyrin repeat domain-containing protein 2A-like [Asparagus officinalis]
c126184_g1	cluster 1	-	-	-	-	1.33639	0.000691053	0.0082127	up	-	-	-	-	-	-	4641.GSMUA_Achr8P10930_001|-175.0|ENOG4111J7E|S|NA	-	-	XP_020275186.1|-195.6|protein TRIGALACTOSYLDIACYLGLYCEROL 4, chloroplastic [Asparagus officinalis]
c126272_g1	cluster 1	-	-	-	-	1.12937	0.00131506	0.0107522	up	1.16457	0.00250825	0.0371026	up	cellular_component:chloroplast thylakoid membrane(GO:0009535);;cellular_component:chloroplast thylakoid membrane(GO:0009535);;cellular_component:plastid(GO:0009536);;cellular_component:thylakoid(GO:0009579);;cellular_component:membrane(GO:0016020);;cellular_component:chloroplast nucleoid(GO:0042644);;cellular_component:chloroplast nucleoid(GO:0042644);;cellular_component:stromal side of plastid t…	-	3694.POPTR_0009s04180.1|-79.4|COG0702|GM|epimerase dehydratase	-	Q9STF2|PTA16_ARATH|-74.2|Protein plastid transcriptionally active 16, chloroplastic OS=Arabidopsis thaliana GN=PTAC16 PE=1 SV=1	XP_020273273.1|-111.1|protein plastid transcriptionally active 16, chloroplastic [Asparagus officinalis]
c130240_g1	cluster 2	1.40439	0.00301932	0.015389	up	1.3935	0.000709739	0.00825914	up	-	-	-	-	biological_process:positive regulation of response to salt stress(GO:1901002);;biological_process:heat acclimation(GO:0010286);;cellular_component:plasma membrane(GO:0005886);;biological_process:response to paraquat(GO:1901562);;biological_process:seed maturation(GO:0010431);;cellular_component:plasma membrane(GO:0005886);;biological_process:positive regulation of response to oxidative stress(GO:…	-	4081.Solyc12g010320.1.1|-70.7|COG3040|M|Outer membrane lipoprotein	-	Q9FGT8|TIL_ARATH|-68.1|Temperature-induced lipocalin-1 OS=Arabidopsis thaliana GN=TIL PE=1 SV=1	XP_007011974.1|-72.2|PREDICTED: temperature-induced lipocalin-1 [Theobroma cacao]
c131059_g1	cluster 6	-	-	-	-	-	-	-	-	-	-	-	-	cellular_component:plastid(GO:0009536);;cellular_component:chloroplast(GO:0009507);;cellular_component:chloroplast(GO:0009507);;cellular_component:chloroplast(GO:0009507)	-	4641.GSMUA_Achr8P19930_001|-166.6|COG0693|S|PfpI family	-	Q9MAH3|DJ1B_ARATH|-151.1|Protein DJ-1 homolog B OS=Arabidopsis thaliana GN=DJ1B PE=1 SV=1	XP_010915629.1|-187.3|PREDICTED: protein DJ-1 homolog B [Elaeis guineensis]
c131260_g1	cluster 2	1.52748	0.000653539	0.00707108	up	1.12898	0.00482942	0.0214153	up	-	-	-	-	-	-	-	-	-	-
c131767_g1	cluster 2	1.33259	0.00303817	0.0154378	up	1.08294	0.00384577	0.0187327	up	-	-	-	-	-	-	4641.GSMUA_Achr7P15300_001|-76.7|ENOG4111WQ2|S|chloroplast lumen common family protein	-	-	XP_020087303.1|-84.6|protein SLOW GREEN 1, chloroplastic-like [Ananas comosus]
c132126_g1	cluster 1	2.18332	0.000451499	0.00607602	up	2.31915	0.000197261	0.00552715	up	2.04176	0.00129334	0.0298702	up	-	-	29760.VIT_05s0077g01070.t01|-66.9|ENOG410ZKU6|S|universal stress protein	-	-	XP_010931741.1|-66.5|PREDICTED: universal stress protein PHOS32 [Elaeis guineensis]
c13616_g1	cluster 3	-	-	-	-	-1.05092	0.00351295	0.017803	down	-	-	-	-	cellular_component:plastid(GO:0009536);;cellular_component:thylakoid(GO:0009579);;cellular_component:membrane(GO:0016020);;cellular_component:integral component of membrane(GO:0016021);;molecular_function:protein binding(GO:0005515);;cellular_component:chloroplast(GO:0009507);;cellular_component:chloroplast thylakoid membrane(GO:0009535)	sot:102595772|-179.4|K03217|yidC, spoIIIJ, OXA1, ccfA; YidC/Oxa1 family membrane protein insertase|ko03060|Protein export;;	4113.PGSC0003DMT400001063|-180.7|COG0706|U|Required for the insertion and or proper folding and or complex formation of integral membrane proteins into the membrane. Involved in integration of membrane proteins that insert both dependently and independently of the Sec translocase complex, as well as at least some lipoproteins	-	Q8LBP4|ALB3_ARATH|-163.3|Inner membrane protein ALBINO3, chloroplastic OS=Arabidopsis thaliana GN=ALB3 PE=1 SV=2	XP_015164925.1|-178.6|PREDICTED: inner membrane protein PPF-1, chloroplastic [Solanum tuberosum]
c136980_g1	cluster 1	1.90683	0.0015295	0.0105806	up	2.61253	0.000381887	0.00667912	up	2.46706	0.00102397	0.0277191	up	cellular_component:chloroplast outer membrane(GO:0009707);;cellular_component:membrane(GO:0016020);;cellular_component:chloroplast(GO:0009507);;cellular_component:plastid outer membrane(GO:0009527);;cellular_component:plastid(GO:0009536)	-	29760.VIT_01s0011g02860.t01|-10000.0|ENOG4111F63|S|Chloroplast unusual positioning	-	Q9LI74|CHUP1_ARATH|-10000.0|Protein CHUP1, chloroplastic OS=Arabidopsis thaliana GN=CHUP1 PE=1 SV=1	XP_020098505.1|-10000.0|protein CHUP1, chloroplastic [Ananas comosus]
c137756_g1	cluster 6	-1.17368	0.0127311	0.0381479	down	-	-	-	-	-	-	-	-	cellular_component:chloroplast(GO:0009507);;cellular_component:plastid(GO:0009536);;molecular_function:nucleotide binding(GO:0000166);;molecular_function:ATP binding(GO:0005524);;cellular_component:chloroplast(GO:0009507)	-	3847.GLYMA04G37740.1|-133.2|COG0542|O|ATP-dependent CLP protease ATP-binding subunit	-	P35100|CLPC_PEA|-132.6|Chaperone protein ClpC, chloroplastic OS=Pisum sativum PE=2 SV=1	XP_020269530.1|-140.7|chaperone protein ClpC1, chloroplastic-like [Asparagus officinalis]
c138483_g1	cluster 1	1.44845	0.000480962	0.0062131	up	1.4849	6.09345e-05	0.0041923	up	1.59752	0.00536041	0.0493356	up	cellular_component:chloroplast(GO:0009507);;cellular_component:plastid(GO:0009536);;molecular_function:rRNA binding(GO:0019843);;cellular_component:intracellular ribonucleoprotein complex(GO:0030529);;molecular_function:RNA binding(GO:0003723);;cellular_component:ribosome(GO:0005840);;cellular_component:chloroplast(GO:0009507)	egu:105041319|-69.4|K02952|RP-S13, rpsM; small subunit ribosomal protein S13|ko03010|Ribosome;;	4641.GSMUA_Achr4P24290_001|-67.2|COG0099|J|Located at the top of the head of the 30S subunit, it contacts several helices of the 16S rRNA. In the 70S ribosome it contacts the 23S rRNA (bridge B1a) and protein L5 of the 50S subunit (bridge B1b), connecting the 2 subunits	-	P42732|RR13_ARATH|-57.3|30S ribosomal protein S13, chloroplastic OS=Arabidopsis thaliana GN=RPS13 PE=2 SV=1	XP_020257031.1|-73.2|30S ribosomal protein S13, chloroplastic [Asparagus officinalis]
c139430_g1	cluster 1	1.16578	0.00561021	0.0222863	up	1.62874	0.000397089	0.00676561	up	-	-	-	-	cellular_component:plastid(GO:0009536);;biological_process:photorespiration(GO:0009853);;biological_process:carbon fixation(GO:0015977);;biological_process:photosynthesis(GO:0015979);;molecular_function:oxidoreductase activity(GO:0016491);;molecular_function:lyase activity(GO:0016829);;molecular_function:ribulose-bisphosphate carboxylase activity(GO:0016984);;biological_process:reductive pentose-…	mus:103968721|-75.5|K01602|rbcS; ribulose-bisphosphate carboxylase small chain [EC:4.1.1.39]|ko00710|Carbon fixation in photosynthetic organisms;;ko01200|Carbon metabolism;;ko00630|Glyoxylate and dicarboxylate metabolism;;	4641.GSMUA_Achr10P19930_001|-70.6|COG4451|C|RuBisCO catalyzes two reactions the carboxylation of D- ribulose 1,5-bisphosphate, the primary event in carbon dioxide fixation, as well as the oxidative fragmentation of the pentose substrate. Both reactions occur simultaneously and in competition at the same active site	-	O24045|RBS_MUSAC|-74.3|Ribulose bisphosphate carboxylase small chain, chloroplastic OS=Musa acuminata GN=RBCS1 PE=2 SV=1	ABA46900.1|-75.6|chloroplast ribulose-1,5-bisphosphate carboxylase/oxygenase small subunit [Musa acuminata AAA Group]
c139867_g1	cluster 2	1.08103	0.00654334	0.0245542	up	-	-	-	-	-	-	-	-	-	-	4641.GSMUA_Achr8P17700_001|-54.3|ENOG410YI2T|S|NA	-	-	XP_020245446.1|-55.2|DNA repair RAD52-like protein 2, chloroplastic [Asparagus officinalis]
c141203_g1	cluster 1	2.37838	1.39089e-05	0.00305842	up	2.27897	0.000492608	0.00726306	up	1.8575	0.000328364	0.0218913	up	-	-	-	-	-	-
c144184_g1	cluster 1	3.54485	4.23509e-06	0.00243519	up	2.94384	0.000199822	0.00555121	up	2.49639	0.00127362	0.0298702	up	biological_process:fatty acid biosynthetic process(GO:0006633);;cellular_component:chloroplast(GO:0009507);;cellular_component:chloroplast(GO:0009507);;cellular_component:plastid(GO:0009536);;biological_process:lipid metabolic process(GO:0006629);;biological_process:fatty acid metabolic process(GO:0006631);;biological_process:fatty acid biosynthetic process(GO:0006633)	pop:POPTR_0004s11800g|-63.7|K02160|accB, bccP; acetyl-CoA carboxylase biotin carboxyl carrier protein|ko01200|Carbon metabolism;;ko00061|Fatty acid biosynthesis;;ko00620|Pyruvate metabolism;;ko00640|Propanoate metabolism;;ko01212|Fatty acid metabolism;;	3694.POPTR_0004s11800.1|-64.9|COG0511|I|Acetyl-CoA carboxylase, biotin carboxyl carrier protein	-	Q42533|BCCP1_ARATH|-56.3|Biotin carboxyl carrier protein of acetyl-CoA carboxylase 1, chloroplastic OS=Arabidopsis thaliana GN=BCCP1 PE=1 SV=2	XP_020242997.1|-78.4|biotin carboxyl carrier protein of acetyl-CoA carboxylase 1, chloroplastic-like [Asparagus officinalis]
c144434_g1	cluster 2	1.39174	0.000567372	0.00667337	up	1.20397	0.00123871	0.0105142	up	-	-	-	-	biological_process:one-carbon metabolic process(GO:0006730);;biological_process:metabolic process(GO:0008152);;cellular_component:chloroplast(GO:0009507);;cellular_component:chloroplast(GO:0009507);;cellular_component:plastid(GO:0009536);;biological_process:photorespiration(GO:0009853);;molecular_function:oxidoreductase activity(GO:0016491);;molecular_function:hydrolase activity(GO:0016787);;biol…	-	4555.Si017559m|-137.8|COG0190|H|Catalyzes the oxidation of 5,10- methylenetetrahydrofolate to 5,10-methenyltetrahydrofolate and then the hydrolysis of 5,10-methenyltetrahydrofolate to 10- formyltetrahydrofolate (By similarity)	PF02882.17|THF_DHG_CYH_C|1.4e-65|Tetrahydrofolate dehydrogenase/cyclohydrolase, NAD(P)-binding domain	O65271|FOLD4_ARATH|-127.9|Bifunctional protein FolD 4, chloroplastic OS=Arabidopsis thaliana GN=FOLD4 PE=1 SV=1	XP_020269787.1|-152.4|bifunctional protein FolD 4, chloroplastic-like isoform X1 [Asparagus officinalis]
c146281_g1	cluster 1	2.1912	0.000143542	0.00416038	up	1.92257	9.25341e-05	0.00456725	up	1.81532	0.000464178	0.0231662	up	cellular_component:plastid(GO:0009536);;molecular_function:protein binding(GO:0005515);;cellular_component:chloroplast(GO:0009507);;cellular_component:chloroplast(GO:0009507)	-	4641.GSMUA_Achr5P18820_001|-67.7|COG0542|O|ATP-dependent CLP protease ATP-binding subunit	-	Q93WL3|CLPT1_ARATH|-58.4|ATP-dependent Clp protease ATP-binding subunit CLPT1, chloroplastic OS=Arabidopsis thaliana GN=CLPT1 PE=1 SV=1	XP_020274647.1|-76.8|ATP-dependent Clp protease ATP-binding subunit CLPT1, chloroplastic-like [Asparagus officinalis]
c146940_g1	cluster 1	1.35113	0.006307	0.0240096	up	1.44681	0.000847859	0.00891744	up	-	-	-	-	cellular_component:chloroplast(GO:0009507);;cellular_component:chloroplast(GO:0009507);;cellular_component:plastid(GO:0009536);;molecular_function:kinase activity(GO:0016301);;biological_process:phosphorylation(GO:0016310);;molecular_function:transferase activity(GO:0016740);;biological_process:reductive pentose-phosphate cycle(GO:0019253);;biological_process:reductive pentose-phosphate cycle(GO:…	pda:103704546|-85.2|K00927|PGK, pgk; phosphoglycerate kinase [EC:2.7.2.3]|ko00710|Carbon fixation in photosynthetic organisms;;ko01200|Carbon metabolism;;ko01230|Biosynthesis of amino acids;;ko00010|Glycolysis / Gluconeogenesis;;	29760.VIT_19s0085g00380.t01|-86.3|COG0126|G|phosphoglycerate kinase	PF00162.17|PGK|2.2e-61|Phosphoglycerate kinase	Q42961|PGKH_TOBAC|-86.6|Phosphoglycerate kinase, chloroplastic OS=Nicotiana tabacum PE=2 SV=1	KNA25347.1|-88.8|hypothetical protein SOVF_007410 [Spinacia oleracea]
c148169_g1	cluster 2	2.25251	0.00134796	0.00990557	up	1.9486	0.00173408	0.0121233	up	-	-	-	-	cellular_component:chloroplast(GO:0009507);;cellular_component:plastid(GO:0009536);;molecular_function:rRNA binding(GO:0019843);;cellular_component:intracellular ribonucleoprotein complex(GO:0030529);;molecular_function:RNA binding(GO:0003723);;cellular_component:ribosome(GO:0005840);;cellular_component:chloroplast(GO:0009507)	egr:104441959|-59.5|K02884|RP-L19, MRPL19, rplS; large subunit ribosomal protein L19|ko03010|Ribosome;;	29760.VIT_00s0616g00020.t01|-59.0|COG0335|J|This protein is located at the 30S-50S ribosomal subunit interface and may play a role in the structure and function of the aminoacyl-tRNA binding site (By similarity)	-	P82413|RK19_SPIOL|-57.0|50S ribosomal protein L19, chloroplastic OS=Spinacia oleracea GN=RPL19 PE=1 SV=2	ONK56324.1|-59.1|uncharacterized protein A4U43_C10F6840 [Asparagus officinalis]
c148213_g1	cluster 1	1.70975	8.70445e-05	0.0037683	up	1.91978	0.000208589	0.0056185	up	-	-	-	-	cellular_component:chloroplast(GO:0009507);;cellular_component:plastid(GO:0009536);;molecular_function:isomerase activity(GO:0016853);;molecular_function:ribose-5-phosphate isomerase activity(GO:0004751);;biological_process:pentose-phosphate shunt(GO:0006098);;cellular_component:chloroplast(GO:0009507)	mus:103997566|-113.9|K01807|rpiA; ribose 5-phosphate isomerase A [EC:5.3.1.6]|ko00710|Carbon fixation in photosynthetic organisms;;ko01200|Carbon metabolism;;ko00030|Pentose phosphate pathway;;ko01230|Biosynthesis of amino acids;;	29760.VIT_14s0030g01900.t01|-112.7|COG0120|G|phosphoriboisomerase A	PF06026.12|Rib_5-P_isom_A|1.7e-61|Ribose 5-phosphate isomerase A (phosphoriboisomerase A)	Q9S726|RPI3_ARATH|-103.6|Probable ribose-5-phosphate isomerase 3, chloroplastic OS=Arabidopsis thaliana GN=RPI3 PE=1 SV=1	XP_009417101.1|-113.1|PREDICTED: probable ribose-5-phosphate isomerase 3, chloroplastic [Musa acuminata subsp. malaccensis]
c148262_g1	cluster 2	1.44421	0.000143798	0.00416038	up	1.15016	0.000134977	0.00503206	up	-	-	-	-	biological_process:fatty acid biosynthetic process(GO:0006633);;cellular_component:chloroplast(GO:0009507);;cellular_component:chloroplast(GO:0009507);;cellular_component:plastid(GO:0009536);;biological_process:lipid metabolic process(GO:0006629);;biological_process:fatty acid metabolic process(GO:0006631);;biological_process:fatty acid biosynthetic process(GO:0006633)	pop:POPTR_0017s12810g|-66.9|K02160|accB, bccP; acetyl-CoA carboxylase biotin carboxyl carrier protein|ko01200|Carbon metabolism;;ko00061|Fatty acid biosynthesis;;ko00620|Pyruvate metabolism;;ko00640|Propanoate metabolism;;ko01212|Fatty acid metabolism;;	3694.POPTR_0017s12810.1|-68.1|COG0511|I|Acetyl-CoA carboxylase, biotin carboxyl carrier protein	-	Q42533|BCCP1_ARATH|-58.7|Biotin carboxyl carrier protein of acetyl-CoA carboxylase 1, chloroplastic OS=Arabidopsis thaliana GN=BCCP1 PE=1 SV=2	XP_020242997.1|-84.5|biotin carboxyl carrier protein of acetyl-CoA carboxylase 1, chloroplastic-like [Asparagus officinalis]
c148360_g1	cluster 4	2.24164	0.00103066	0.00868202	up	1.10544	0.00732318	0.0275281	up	-	-	-	-	cellular_component:plastid(GO:0009536);;biological_process:response to abscisic acid(GO:0009737);;biological_process:circadian rhythm(GO:0007623);;cellular_component:chloroplast(GO:0009507);;cellular_component:chloroplast(GO:0009507)	egu:105044044|-167.8|K19366|SPG20; spartin|ko04144|Endocytosis;;	29760.VIT_03s0038g02280.t01|-153.0|ENOG410ZEPM|S|Spastic paraplegia 20 (Troyer syndrome)	-	O48832|ERD7_ARATH|-135.7|Protein EARLY-RESPONSIVE TO DEHYDRATION 7, chloroplastic OS=Arabidopsis thaliana GN=ERD7 PE=1 SV=1	XP_010920125.1|-167.0|PREDICTED: protein EARLY-RESPONSIVE TO DEHYDRATION 7, chloroplastic [Elaeis guineensis]
c148387_g1	cluster 1	2.42783	7.58315e-05	0.0036699	up	2.30342	0.000147254	0.00509747	up	2.48012	0.00157517	0.0317217	up	-	-	-	-	-	-
c148391_g1	cluster 2	1.493	7.85638e-05	0.0036699	up	-	-	-	-	-	-	-	-	cellular_component:plastid(GO:0009536);;cellular_component:thylakoid(GO:0009579);;cellular_component:chloroplast inner membrane(GO:0009706);;cellular_component:membrane(GO:0016020);;biological_process:viral process(GO:0016032);;cellular_component:chloroplast(GO:0009507);;cellular_component:plastid inner membrane(GO:0009528);;cellular_component:chloroplast thylakoid membrane(GO:0009535)	-	4641.GSMUA_Achr3P19330_001|-130.6|COG1842|KT|Phage shock protein A	-	Q8S0J7|IM30_ORYSJ|-122.2|Probable membrane-associated 30 kDa protein, chloroplastic OS=Oryza sativa subsp. japonica GN=Os01g0895100 PE=1 SV=1	XP_020254543.1|-142.5|probable membrane-associated 30 kDa protein, chloroplastic [Asparagus officinalis]
c148454_g1	cluster 1	1.31066	0.0001152	0.00401207	up	1.21361	0.000114025	0.00485536	up	1.21166	0.000502108	0.0235817	up	cellular_component:mitochondrion(GO:0005739);;cellular_component:mitochondrion(GO:0005739);;molecular_function:kinase activity(GO:0016301);;biological_process:phosphorylation(GO:0016310);;molecular_function:transferase activity(GO:0016740);;molecular_function:nucleotide binding(GO:0000166);;molecular_function:adenylate kinase activity(GO:0004017);;molecular_function:ATP binding(GO:0005524)	nnu:104594720|-110.4|K00939|adk, AK; adenylate kinase [EC:2.7.4.3]|ko00230|Purine metabolism;;	15368.BRADI1G76407.1|-106.8|COG0563|F|Catalyzes the reversible transfer of the terminal phosphate group between ATP and AMP. Plays an important role in cellular energy homeostasis and in adenine nucleotide metabolism (By similarity)	-	Q10S93|KAD1_ORYSJ|-105.8|Probable adenylate kinase 1, chloroplastic OS=Oryza sativa subsp. japonica GN=Os03g0130400 PE=2 SV=1	XP_020246647.1|-113.7|probable adenylate kinase 1, chloroplastic [Asparagus officinalis]
c148834_g1	cluster 2	1.08263	0.000483634	0.00623109	up	-	-	-	-	-	-	-	-	cellular_component:plastid(GO:0009536);;cellular_component:thylakoid(GO:0009579);;biological_process:abscisic acid biosynthetic process(GO:0009688);;biological_process:abscisic acid biosynthetic process(GO:0009688);;biological_process:abscisic acid biosynthetic process(GO:0009688);;cellular_component:membrane(GO:0016020);;biological_process:xanthophyll biosynthetic process(GO:0016123);;molecular_…	pda:103712512|-275.8|K09838|ZEP, ABA1; zeaxanthin epoxidase [EC:1.14.15.21]|ko00906|Carotenoid biosynthesis;;	4555.Si009564m|-269.1|COG0654|CH|oxidoreductase activity, acting on paired donors, with incorporation or reduction of molecular oxygen, NAD(P)H as one donor, and incorporation of one atom of oxygen	-	Q0JCU7|ZEP_ORYSJ|-267.1|Zeaxanthin epoxidase, chloroplastic OS=Oryza sativa subsp. japonica GN=ZEP PE=2 SV=1	XP_020269203.1|-286.4|zeaxanthin epoxidase, chloroplastic [Asparagus officinalis]
c150204_g1	cluster 1	1.14769	0.00149095	0.0104157	up	-	-	-	-	-	-	-	-	biological_process:ion transport(GO:0006811);;cellular_component:chloroplast(GO:0009507);;cellular_component:chloroplast thylakoid membrane(GO:0009535);;cellular_component:plastid(GO:0009536);;cellular_component:thylakoid(GO:0009579);;biological_process:proton transport(GO:0015992);;cellular_component:membrane(GO:0016020);;cellular_component:integral component of membrane(GO:0016021);;cellular_co…	pda:103712135|-65.4|K02109|ATPF0B, atpF; F-type H+-transporting ATPase subunit b|ko00190|Oxidative phosphorylation;;ko00195|Photosynthesis;;	4577.GRMZM5G825759_P01|-63.8|ENOG4112003|U|ATp synthase	-	P31853|ATPX_SPIOL|-59.5|ATP synthase subunit b', chloroplastic OS=Spinacia oleracea GN=ATPG PE=1 SV=2	XP_008796790.1|-64.7|PREDICTED: ATP synthase subunit b', chloroplastic [Phoenix dactylifera]
c153259_g1	cluster 1	1.94673	0.000588891	0.00676661	up	1.75834	0.000394826	0.00675745	up	1.5046	0.00176375	0.0328039	up	biological_process:pyrimidine nucleotide biosynthetic process(GO:0006221);;biological_process:arginine biosynthetic process(GO:0006526);;biological_process:arginine biosynthetic process(GO:0006526);;biological_process:cellular amino acid biosynthetic process(GO:0008652);;cellular_component:chloroplast(GO:0009507);;cellular_component:chloroplast(GO:0009507);;cellular_component:plastid(GO:0009536);…	aly:ARALYDRAFT_473200|-10000.0|K01955|carB, CPA2; carbamoyl-phosphate synthase large subunit [EC:6.3.5.5]|ko00250|Alanine, aspartate and glutamate metabolism;;ko00240|Pyrimidine metabolism;;	29760.VIT_06s0004g03360.t01|-10000.0|COG0458|F|carbamoyl-phosphate synthetase ammonia chain	PF02786.15|CPSase_L_D2|1.5e-71|Carbamoyl-phosphate synthase L chain, ATP binding domain	B9EXM2|CARB_ORYSJ|-10000.0|Carbamoyl-phosphate synthase large chain, chloroplastic OS=Oryza sativa subsp. japonica GN=CARB PE=2 SV=1	NP_001312336.1|-10000.0|carbamoyl-phosphate synthase large chain, chloroplastic-like [Nicotiana tabacum]
c153663_g1	cluster 1	1.70318	3.08635e-05	0.00327353	up	1.52184	7.97175e-05	0.00435085	up	1.17575	0.000595416	0.0245508	up	cellular_component:signal recognition particle, endoplasmic reticulum targeting(GO:0005786);;cellular_component:chloroplast(GO:0009507);;cellular_component:plastid(GO:0009536);;cellular_component:chloroplast stroma(GO:0009570);;cellular_component:intracellular ribonucleoprotein complex(GO:0030529);;molecular_function:nucleotide binding(GO:0000166);;molecular_function:RNA binding(GO:0003723);;mole…	egu:105038252|-243.3|K03106|SRP54, ffh; signal recognition particle subunit SRP54 [EC:3.6.5.4]|ko03060|Protein export;;	29760.VIT_08s0007g03160.t01|-240.5|COG0541|U|Involved in targeting and insertion of nascent membrane proteins into the cytoplasmic membrane. Binds to the hydrophobic signal sequence of the ribosome-nascent chain (RNC) as it emerges from the ribosomes. The SRP-RNC complex is then targeted to the cytoplasmic membrane where it interacts with the SRP receptor FtsY	PF00448.20|SRP54|2.8e-78|SRP54-type protein, GTPase domain	P37107|SR54C_ARATH|-220.9|Signal recognition particle 54 kDa protein, chloroplastic OS=Arabidopsis thaliana GN=FFC PE=1 SV=1	XP_010912298.1|-242.5|PREDICTED: signal recognition particle 54 kDa protein, chloroplastic [Elaeis guineensis]
c154164_g1	cluster 2	1.81093	0.000771862	0.0075978	up	1.63377	0.00197404	0.0129242	up	-	-	-	-	cellular_component:chloroplast(GO:0009507);;cellular_component:plastid(GO:0009536);;cellular_component:chloroplast stroma(GO:0009570)	-	4641.GSMUA_Achr11P20820_001|-65.3|COG0694|O|metallo-sulfur cluster assembly	-	Q93W77|NIFU1_ARATH|-59.7|NifU-like protein 1, chloroplastic OS=Arabidopsis thaliana GN=NIFU1 PE=1 SV=1	XP_020265043.1|-70.4|LOW QUALITY PROTEIN: nifU-like protein 1, chloroplastic [Asparagus officinalis]
c154197_g1	cluster 4	-	-	-	-	-	-	-	-	-	-	-	-	biological_process:metabolic process(GO:0008152);;biological_process:cellular amino acid biosynthetic process(GO:0008652);;biological_process:aromatic amino acid family biosynthetic process(GO:0009073);;biological_process:aromatic amino acid family biosynthetic process(GO:0009073);;cellular_component:chloroplast(GO:0009507);;cellular_component:chloroplast(GO:0009507);;cellular_component:plastid(G…	pda:103700862|-113.5|K01850|E5.4.99.5; chorismate mutase [EC:5.4.99.5]|ko01230|Biosynthesis of amino acids;;ko00400|Phenylalanine, tyrosine and tryptophan biosynthesis;;	4641.GSMUA_Achr4P32650_001|-111.7|COG1605|E|Chorismate mutase	-	P42738|CM1_ARATH|-97.0|Chorismate mutase 1, chloroplastic OS=Arabidopsis thaliana GN=CM1 PE=1 SV=3	XP_020274324.1|-126.2|chorismate mutase 1, chloroplastic-like [Asparagus officinalis]
c154595_g1	cluster 1	1.00663	0.000885653	0.00807894	up	-	-	-	-	-	-	-	-	cellular_component:chloroplast(GO:0009507);;cellular_component:plastid(GO:0009536);;biological_process:photosynthetic acclimation(GO:0009643);;molecular_function:phosphoglycerate transmembrane transporter activity(GO:0015120);;molecular_function:glucose-6-phosphate transmembrane transporter activity(GO:0015152);;biological_process:phosphoglycerate transport(GO:0015713);;biological_process:phospho…	-	29760.VIT_10s0116g00760.t01|-161.2|ENOG410XP1S|S|solute carrier family 35 member	PF03151.14|TPT|1.2e-116|Triose-phosphate Transporter family	Q94B38|GPT2_ARATH|-161.4|Glucose-6-phosphate/phosphate translocator 2, chloroplastic OS=Arabidopsis thaliana GN=GPT2 PE=2 SV=2	XP_020256568.1|-173.2|glucose-6-phosphate/phosphate translocator 1, chloroplastic-like [Asparagus officinalis]
c154753_g1	cluster 2	2.12563	0.000123216	0.00407864	up	1.86789	0.000622068	0.00794248	up	-	-	-	-	cellular_component:plastid(GO:0009536);;cellular_component:chloroplast stroma(GO:0009570);;molecular_function:hydrolase activity(GO:0016787);;molecular_function:metal ion binding(GO:0046872);;molecular_function:inorganic diphosphatase activity(GO:0004427);;molecular_function:inorganic diphosphatase activity(GO:0004427);;cellular_component:chloroplast(GO:0009507)	pda:103705705|-124.2|K01507|ppa; inorganic pyrophosphatase [EC:3.6.1.1]|ko00190|Oxidative phosphorylation;;	3694.POPTR_0009s08480.1|-119.6|COG0221|C|Pyrophosphate phospho-hydrolase	-	Q9LXC9|IPYR6_ARATH|-117.7|Soluble inorganic pyrophosphatase 6, chloroplastic OS=Arabidopsis thaliana GN=PPA6 PE=1 SV=1	XP_020272603.1|-127.0|soluble inorganic pyrophosphatase 6, chloroplastic, partial [Asparagus officinalis]
c154886_g1	cluster 1	2.2051	0.00120307	0.00939075	up	2.21413	0.000923754	0.00923469	up	1.88069	0.00234738	0.0361433	up	-	-	29760.VIT_05s0077g01070.t01|-66.6|ENOG410ZKU6|S|universal stress protein	-	-	XP_008797443.1|-66.3|PREDICTED: universal stress protein PHOS32 isoform X2 [Phoenix dactylifera]
c156181_g1	cluster 1	2.86813	0.000498747	0.00630211	up	2.61809	0.00021104	0.00563336	up	2.70739	0.00220291	0.0353516	up	cellular_component:plastid(GO:0009536);;molecular_function:metal ion binding(GO:0046872);;biological_process:thiamine biosynthetic process(GO:0009228);;cellular_component:chloroplast(GO:0009507);;cellular_component:chloroplast(GO:0009507)	bdi:100841709|-143.4|K03146|THI4, THI1; thiamine thiazole synthase|ko00730|Thiamine metabolism;;	15368.BRADI1G25860.1|-144.7|COG1635|H|Involved in biosynthesis of the thiamine precursor thiazole. Catalyzes the conversion of NAD and glycine to adenosine diphosphate 5-(2-hydroxyethyl)-4-methylthiazole-2-carboxylic acid (ADT), an adenylated thiazole intermediate. The reaction includes an iron-dependent sulfide transfer from a conserved cysteine residue of the protein to a thiazole intermediate.…	PF01946.15|Thi4|2.1e-112|Thi4 family	F6H9A9|THI41_VITVI|-143.2|Thiamine thiazole synthase 1, chloroplastic OS=Vitis vinifera GN=THI1-1 PE=3 SV=1	OIW11177.1|-143.5|hypothetical protein TanjilG_22984 [Lupinus angustifolius]
c156254_g1	cluster 2	1.67659	0.000521097	0.0064115	up	-	-	-	-	-	-	-	-	-	-	4081.Solyc10g085040.1.1|-73.1|ENOG4111V4G|S|SOUL heme-binding protein	-	-	XP_009794784.1|-73.7|PREDICTED: heme-binding-like protein At3g10130, chloroplastic [Nicotiana sylvestris]
c157625_g1	cluster 4	1.84519	0.000108543	0.0039921	up	1.36898	3.48446e-05	0.00394232	up	-	-	-	-	cellular_component:thylakoid(GO:0009579);;cellular_component:chloroplast(GO:0009507);;cellular_component:plastid(GO:0009536);;cellular_component:chloroplast thylakoid lumen(GO:0009543)	nnu:104594634|-75.0|K02717|psbP; photosystem II oxygen-evolving enhancer protein 2|ko00195|Photosynthesis;;	4641.GSMUA_Achr7P18220_001|-76.2|ENOG4111N4V|G|Photosystem II oxygen evolving complex protein PsbP	-	P82538|PPL1_ARATH|-68.2|PsbP-like protein 1, chloroplastic OS=Arabidopsis thaliana GN=PPL1 PE=1 SV=1	XP_020273664.1|-83.8|psbP-like protein 1, chloroplastic isoform X2 [Asparagus officinalis]
c157902_g2	cluster 1	2.36147	0.000171707	0.00428519	up	2.24747	3.64018e-05	0.00394232	up	2.05809	0.00111092	0.0284991	up	molecular_function:hydrolase activity(GO:0016787);;molecular_function:metal ion binding(GO:0046872);;cellular_component:chloroplast(GO:0009507);;cellular_component:chloroplast(GO:0009507);;cellular_component:plastid(GO:0009536)	-	4555.Si023162m|-66.4|COG0494|L|Nudix hydrolase	-	Q9CAF2|NUD26_ARATH|-63.5|Nudix hydrolase 26, chloroplastic OS=Arabidopsis thaliana GN=NUDT26 PE=1 SV=1	XP_020260414.1|-72.1|nudix hydrolase 26, chloroplastic-like [Asparagus officinalis]
c158031_g1	cluster 2	2.57602	0.000354596	0.0054619	up	2.49369	0.000489097	0.0072543	up	-	-	-	-	molecular_function:transaminase activity(GO:0008483);;biological_process:cellular amino acid biosynthetic process(GO:0008652);;cellular_component:chloroplast(GO:0009507);;cellular_component:chloroplast(GO:0009507);;cellular_component:plastid(GO:0009536);;molecular_function:transferase activity(GO:0016740);;molecular_function:L-phenylalanine:2-oxoglutarate aminotransferase activity(GO:0080130);;bi…	egu:105058717|-179.8|K00817|hisC; histidinol-phosphate aminotransferase [EC:2.6.1.9]|ko00400|Phenylalanine, tyrosine and tryptophan biosynthesis;;ko00350|Tyrosine metabolism;;ko00340|Histidine metabolism;;ko01230|Biosynthesis of amino acids;;ko00960|Tropane, piperidine and pyridine alkaloid biosynthesis;;ko00360|Phenylalanine metabolism;;	4558.Sb04g030300.1|-180.6|COG0079|E|Imidazole acetol-phosphate transaminase	-	Q9FEW2|HIS8_NICPL|-175.0|Histidinol-phosphate aminotransferase, chloroplastic OS=Nicotiana plumbaginifolia GN=HPA PE=1 SV=1	XP_020098060.1|-182.4|histidinol-phosphate aminotransferase, chloroplastic-like [Ananas comosus]
c158643_g1	cluster 1	3.16601	8.74796e-05	0.0037826	up	3.53375	7.25399e-05	0.00425341	up	3.30565	0.000212655	0.0201196	up	cellular_component:chloroplast(GO:0009507);;cellular_component:chloroplast(GO:0009507);;cellular_component:plastid(GO:0009536);;molecular_function:lyase activity(GO:0016829);;molecular_function:metal ion binding(GO:0046872);;molecular_function:phosphopyruvate hydratase activity(GO:0004634);;biological_process:glycolytic process(GO:0006096);;biological_process:glycolytic process(GO:0006096)	spen:107015429|-229.4|K01689|ENO, eno; enolase [EC:4.2.1.11]|ko03018|RNA degradation;;ko01200|Carbon metabolism;;ko01230|Biosynthesis of amino acids;;ko00010|Glycolysis / Gluconeogenesis;;	4113.PGSC0003DMT400062986|-229.7|COG0148|G|Catalyzes the reversible conversion of 2- phosphoglycerate into phosphoenolpyruvate. It is essential for the degradation of carbohydrates via glycolysis (By similarity)	PF00113.20|Enolase_C|4.9e-148|Enolase, C-terminal TIM barrel domain	Q9C9C4|ENO1_ARATH|-217.7|Enolase 1, chloroplastic OS=Arabidopsis thaliana GN=ENO1 PE=1 SV=1	XP_015071178.1|-228.6|PREDICTED: enolase 1, chloroplastic [Solanum pennellii]
c158760_g1	cluster 3	-1.38351	0.00177401	0.01147	down	-1.12986	0.00615895	0.0246695	down	-1.20557	0.00383641	0.0436026	down	biological_process:glycolytic process(GO:0006096);;biological_process:glycolytic process(GO:0006096);;cellular_component:chloroplast(GO:0009507);;cellular_component:plastid(GO:0009536);;cellular_component:chloroplast stroma(GO:0009570);;molecular_function:isomerase activity(GO:0016853);;molecular_function:glucose-6-phosphate isomerase activity(GO:0004347);;biological_process:gluconeogenesis(GO:00…	mtr:MTR_5g065880|-59.7|K01810|GPI, pgi; glucose-6-phosphate isomerase [EC:5.3.1.9]|ko01200|Carbon metabolism;;ko00520|Amino sugar and nucleotide sugar metabolism;;ko00030|Pentose phosphate pathway;;ko00500|Starch and sucrose metabolism;;ko00010|Glycolysis / Gluconeogenesis;;	29760.VIT_18s0001g07280.t01|-59.5|COG0166|G|glucose-6-phosphate isomerase activity	-	Q8H103|G6PIP_ARATH|-57.9|Glucose-6-phosphate isomerase 1, chloroplastic OS=Arabidopsis thaliana GN=PGI1 PE=1 SV=1	ONK74179.1|-60.7|uncharacterized protein A4U43_C03F3620 [Asparagus officinalis]
c159230_g1	cluster 1	-	-	-	-	1.18744	0.00500833	0.0218813	up	-	-	-	-	-	-	-	-	-	-
c159232_g1	cluster 3	-1.15284	0.00711632	0.0259378	down	-1.11783	0.0149492	0.0437142	down	-	-	-	-	-	-	-	-	-	-
c159499_g1	cluster 1	1.48949	0.000139861	0.00414435	up	1.93851	6.07065e-05	0.0041923	up	2.06439	0.000913955	0.0268931	up	cellular_component:chloroplast(GO:0009507);;cellular_component:chloroplast(GO:0009507);;cellular_component:plastid(GO:0009536)	-	15368.BRADI4G42320.1|-98.3|ENOG4110CPJ|S|NA	-	Q9LZ23|ACR12_ARATH|-90.2|ACT domain-containing protein ACR12 OS=Arabidopsis thaliana GN=ACR12 PE=2 SV=1	XP_010912277.1|-103.9|PREDICTED: ACT domain-containing protein ACR12 [Elaeis guineensis]
c161137_g1	cluster 4	-	-	-	-	-	-	-	-	-	-	-	-	cellular_component:plastid(GO:0009536);;molecular_function:oxidoreductase activity(GO:0016491);;biological_process:cysteine biosynthetic process(GO:0019344);;molecular_function:adenylyl-sulfate reductase (glutathione) activity(GO:0033741);;molecular_function:metal ion binding(GO:0046872);;molecular_function:iron-sulfur cluster binding(GO:0051536);;molecular_function:4 iron, 4 sulfur cluster bindi…	egu:105050935|-184.8|K05907|APR; adenylyl-sulfate reductase (glutathione) [EC:1.8.4.9]|ko00920|Sulfur metabolism;;	4113.PGSC0003DMT400051168|-183.5|COG0175|P|Reduction of activated sulfate into sulfite (By similarity)	-	P92980|APR3_ARATH|-179.4|5'-adenylylsulfate reductase 3, chloroplastic OS=Arabidopsis thaliana GN=APR3 PE=2 SV=2	XP_010929469.1|-183.9|PREDICTED: 5'-adenylylsulfate reductase 1, chloroplastic [Elaeis guineensis]
c161167_g1	cluster 4	1.96931	0.000196311	0.00444893	up	1.40268	0.000338588	0.00645476	up	1.09512	0.0049377	0.0478014	up	cellular_component:chloroplast(GO:0009507);;cellular_component:plastid outer membrane(GO:0009527);;cellular_component:plastid(GO:0009536);;cellular_component:chloroplast outer membrane(GO:0009707);;molecular_function:porin activity(GO:0015288);;molecular_function:porin activity(GO:0015288);;cellular_component:membrane(GO:0016020);;cellular_component:integral component of membrane(GO:0016021);;cel…	-	4641.GSMUA_Achr1P07200_001|-61.4|ENOG4111ZXC|U|Voltage-dependent rectifying anion channel that facilitates the translocation between chloroplast and cytoplasm of phosphorylated carbohydrates such as triosephosphate, 3- phosphoglycerate and inorganic phosphate (Pi) depending of ATP to triosephosphate ratio in the plastidial intermembrane space	-	Q9FPG2|OP21B_ARATH|-52.4|Outer envelope pore protein 21B, chloroplastic OS=Arabidopsis thaliana GN=OEP21B PE=2 SV=1	XP_020242622.1|-68.5|outer envelope pore protein 21, chloroplastic-like [Asparagus officinalis]
c161865_g1	cluster 2	2.02877	3.01467e-05	0.00327353	up	1.44674	0.000108052	0.00475899	up	-	-	-	-	molecular_function:potassium ion binding(GO:0030955);;molecular_function:ATP binding(GO:0005524);;molecular_function:metal ion binding(GO:0046872);;cellular_component:mitochondrion(GO:0005739);;cellular_component:mitochondrion(GO:0005739);;biological_process:glycolytic process(GO:0006096);;biological_process:glycolytic process(GO:0006096);;cellular_component:chloroplast(GO:0009507);;cellular_comp…	egu:105047533|-259.1|K00873|PK, pyk; pyruvate kinase [EC:2.7.1.40]|ko01200|Carbon metabolism;;ko00620|Pyruvate metabolism;;ko00230|Purine metabolism;;ko01230|Biosynthesis of amino acids;;ko00010|Glycolysis / Gluconeogenesis;;	39947.LOC_Os01g47080.1|-253.3|COG0469|G|Pyruvate kinase	PF00224.19|PK|8.9e-116|Pyruvate kinase, barrel domain	Q9FLW9|PKP2_ARATH|-246.7|Plastidial pyruvate kinase 2 OS=Arabidopsis thaliana GN=PKP2 PE=1 SV=1	XP_020265108.1|-266.7|plastidial pyruvate kinase 2 [Asparagus officinalis]
c164468_g1	cluster 4	1.91753	0.000187649	0.00439129	up	1.31883	0.00281841	0.0157538	up	1.08687	0.00113313	0.0287976	up	cellular_component:chloroplast(GO:0009507);;cellular_component:chloroplast(GO:0009507);;cellular_component:plastid(GO:0009536)	-	4641.GSMUA_Achr6P15220_001|-106.2|COG0702|GM|epimerase dehydratase	-	O80934|Y2766_ARATH|-102.4|Uncharacterized protein At2g37660, chloroplastic OS=Arabidopsis thaliana GN=At2g37660 PE=1 SV=2	XP_010920552.1|-107.5|PREDICTED: uncharacterized protein At5g02240 [Elaeis guineensis]
c167187_g1	cluster 4	1.55649	0.00236356	0.0133685	up	1.08485	0.00353511	0.0178424	up	-	-	-	-	-	-	-	-	-	-
c167397_g1	cluster 5	-	-	-	-	-	-	-	-	1.00002	0.00322861	0.0408092	up	biological_process:defense response(GO:0006952);;biological_process:cellular amino acid biosynthetic process(GO:0008652);;biological_process:threonine biosynthetic process(GO:0009088);;biological_process:threonine biosynthetic process(GO:0009088);;cellular_component:chloroplast(GO:0009507);;cellular_component:plastid(GO:0009536);;cellular_component:chloroplast stroma(GO:0009570);;molecular_functi…	mus:103974271|-121.7|K00872|thrB1; homoserine kinase [EC:2.7.1.39]|ko00260|Glycine, serine and threonine metabolism;;ko01230|Biosynthesis of amino acids;;	29760.VIT_11s0037g00340.t01|-120.4|COG0083|E|Catalyzes the ATP-dependent phosphorylation of L- homoserine to L-homoserine phosphate (By similarity)	-	Q8L7R2|KHSE_ARATH|-115.8|Homoserine kinase OS=Arabidopsis thaliana GN=HSK PE=1 SV=1	AIU48450.1|-132.5|homoserine kinase, partial [Asparagus officinalis]
c168192_g1	cluster 4	1.46861	0.000388595	0.00565779	up	1.13026	0.000473047	0.00716049	up	-	-	-	-	cellular_component:plastid(GO:0009536);;cellular_component:chloroplast stroma(GO:0009570);;cellular_component:intracellular ribonucleoprotein complex(GO:0030529);;biological_process:mRNA processing(GO:0006397);;biological_process:RNA splicing(GO:0008380);;cellular_component:chloroplast(GO:0009507)	-	4641.GSMUA_Achr5P23710_001|-96.6|COG0193|J|The natural substrate for this enzyme may be peptidyl- tRNAs which drop off the ribosome during protein synthesis (By similarity)	-	Q9M5P4|CRS2_MAIZE|-89.4|Chloroplastic group IIB intron splicing facilitator CRS2, chloroplastic OS=Zea mays GN=CRS2 PE=1 SV=1	XP_020270656.1|-103.1|chloroplastic group IIB intron splicing facilitator CRS2, chloroplastic [Asparagus officinalis]
c169184_g1	cluster 5	-	-	-	-	-	-	-	-	-	-	-	-	-	-	-	-	-	XP_020249586.1|-67.0|LOW QUALITY PROTEIN: cyanidin 3-O-rutinoside 5-O-glucosyltransferase-like [Asparagus officinalis]
c169438_g1	cluster 1	1.28495	0.00162392	0.0109236	up	1.31346	0.0019344	0.0127762	up	-	-	-	-	-	-	4641.GSMUA_Achr4P29990_001|-50.5|COG0526|O|Thioredoxin	-	-	XP_020260441.1|-60.9|uncharacterized protein LOC109836833 [Asparagus officinalis]
c169494_g1	cluster 5	-	-	-	-	-	-	-	-	1.23114	0.000280173	0.0216751	up	-	-	-	-	-	-
c169578_g1	cluster 1	1.80608	0.000134794	0.00412982	up	2.0448	0.000113675	0.00485536	up	1.55705	0.000770203	0.0256554	up	cellular_component:chloroplast(GO:0009507);;cellular_component:plastid(GO:0009536);;cellular_component:chloroplast stroma(GO:0009570);;molecular_function:hydrolase activity(GO:0016787);;biological_process:proteolysis(GO:0006508);;molecular_function:peptidase activity(GO:0008233);;molecular_function:serine-type peptidase activity(GO:0008236)	-	4641.GSMUA_Achr8P29950_001|-10000.0|COG1506|E|peptidase s9 prolyl oligopeptidase active site domain protein	-	Q10MJ1|CGEP_ORYSJ|-10000.0|Probable glutamyl endopeptidase, chloroplastic OS=Oryza sativa subsp. japonica GN=GEP PE=2 SV=1	XP_020265546.1|-10000.0|probable glutamyl endopeptidase, chloroplastic [Asparagus officinalis]
c170672_g1	cluster 3	-1.34777	0.00164999	0.0110271	down	-1.62097	0.00874165	0.0306951	down	-	-	-	-	biological_process:positive regulation of response to salt stress(GO:1901002);;biological_process:heat acclimation(GO:0010286);;cellular_component:plasma membrane(GO:0005886);;biological_process:response to paraquat(GO:1901562);;biological_process:seed maturation(GO:0010431);;cellular_component:plasma membrane(GO:0005886);;biological_process:positive regulation of response to oxidative stress(GO:…	-	4641.GSMUA_Achr5P16500_001|-84.0|COG3040|M|Outer membrane lipoprotein	-	Q9FGT8|TIL_ARATH|-83.6|Temperature-induced lipocalin-1 OS=Arabidopsis thaliana GN=TIL PE=1 SV=1	XP_020242301.1|-89.2|temperature-induced lipocalin-1 [Asparagus officinalis]
c170822_g1	cluster 2	1.85979	0.000853645	0.00794224	up	1.45748	0.00235396	0.0142201	up	-	-	-	-	cellular_component:plastid(GO:0009536);;cellular_component:intracellular ribonucleoprotein complex(GO:0030529);;cellular_component:ribosome(GO:0005840);;cellular_component:chloroplast(GO:0009507);;cellular_component:chloroplast(GO:0009507)	nnu:10743871|-108.8|K02967|RP-S2, MRPS2, rpsB; small subunit ribosomal protein S2|ko03010|Ribosome;;	3702.ATCG00160.1|-101.7|COG0052|J|30S ribosomal protein S2	PF00318.18|Ribosomal_S2|7.7e-81|Ribosomal protein S2	A6MMB1|RR2_CHLSC|-110.4|30S ribosomal protein S2, chloroplastic OS=Chloranthus spicatus GN=rps2 PE=3 SV=1	YP_003433964.1|-111.9|ribosomal protein S2 [Typha latifolia]
c171181_g1	cluster 4	1.55994	0.00895926	0.030122	up	1.02034	0.00390332	0.0188669	up	-	-	-	-	-	-	-	-	-	-
c171322_g1	cluster 1	2.11768	0.00038478	0.00563412	up	2.00954	0.00207264	0.0132836	up	2.94821	0.00533444	0.0492273	up	cellular_component:chloroplast stroma(GO:0009570);;molecular_function:lyase activity(GO:0016829);;molecular_function:carbonate dehydratase activity(GO:0004089);;cellular_component:chloroplast(GO:0009507);;cellular_component:plastid(GO:0009536)	pda:103715836|-83.8|K01673|cynT, can; carbonic anhydrase [EC:4.2.1.1]|ko00910|Nitrogen metabolism;;	4641.GSMUA_Achr6P27350_001|-79.8|COG0288|P|carbonic anhydrase	-	P17067|CAHC_PEA|-79.5|Carbonic anhydrase, chloroplastic OS=Pisum sativum PE=1 SV=1	XP_020255397.1|-97.7|carbonic anhydrase 2-like isoform X1 [Asparagus officinalis]
c172103_g1	cluster 4	1.9728	0.000139849	0.00414435	up	1.26439	0.0029799	0.0162078	up	-	-	-	-	biological_process:cellular response to light stimulus(GO:0071482);;biological_process:DNA-templated transcription, initiation(GO:0006352);;biological_process:cellular response to light stimulus(GO:0071482);;biological_process:regulation of transcription, DNA-templated(GO:0006355);;biological_process:regulation of RNA biosynthetic process(GO:2001141);;biological_process:regulation of transcriptio…	-	4641.GSMUA_Achr7P17330_001|-165.4|COG0568|K|Sigma factors are initiation factors that promote the attachment of RNA polymerase to specific initiation sites and are then released (By similarity)	-	O22056|SIGB_ARATH|-154.6|RNA polymerase sigma factor sigB OS=Arabidopsis thaliana GN=SIGB PE=2 SV=2	XP_008805674.1|-177.1|PREDICTED: RNA polymerase sigma factor sigB [Phoenix dactylifera]
c172104_g1	cluster 4	2.08512	0.00156311	0.0107124	up	1.45905	0.00530389	0.022669	up	-	-	-	-	cellular_component:chloroplast(GO:0009507);;cellular_component:chloroplast(GO:0009507);;cellular_component:plastid(GO:0009536)	-	4081.Solyc04g078850.2.1|-61.7|ENOG410YGK0|S|Protein of unknown function (DUF3223)	-	Q42463|DCL_SOLLC|-62.8|Protein DCL, chloroplastic OS=Solanum lycopersicum GN=DCL PE=2 SV=1	OTF91202.1|-64.5|Protein of unknown function (DUF3223) [Helianthus annuus]
c172396_g1	cluster 2	3.64491	0.000156048	0.00421233	up	3.05051	0.000261302	0.00606284	up	1.69653	0.00174661	0.03267	up	cellular_component:chloroplast(GO:0009507);;cellular_component:plastid(GO:0009536);;cellular_component:chloroplast stroma(GO:0009570);;molecular_function:transferase activity(GO:0016740);;molecular_function:nucleotidyltransferase activity(GO:0016779);;biological_process:hydrogen sulfide biosynthetic process(GO:0070814);;molecular_function:nucleotide binding(GO:0000166);;molecular_function:sulfate…	mus:103986179|-202.5|K13811|PAPSS; 3'-phosphoadenosine 5'-phosphosulfate synthase [EC:2.7.7.4 2.7.1.25]|ko00230|Purine metabolism;;ko00920|Sulfur metabolism;;ko00261|Monobactam biosynthesis;;ko00450|Selenocompound metabolism;;	4641.GSMUA_Achr1P14080_001|-203.8|COG2046|P|Catalyzes the first intracellular reaction of sulfate assimilation, forming adenosine-5'-phosphosulfate (APS) from inorganic sulfate and ATP. Plays an important role in sulfate activation as a component of the biosynthesis pathway of sulfur- containing amino acids (By similarity)	PF01747.15|ATP-sulfurylase|1.2e-65|ATP-sulfurylase	Q9LIK9|APS1_ARATH|-192.1|ATP sulfurylase 1, chloroplastic OS=Arabidopsis thaliana GN=APS1 PE=1 SV=1	AAF18998.1|-257.3|ATP-sulfurylase [Allium cepa]
c172756_g1	cluster 2	3.40773	8.39171e-06	0.00265254	up	2.13798	0.000422293	0.00691764	up	1.21911	4.56387e-05	0.0173765	up	cellular_component:chloroplast(GO:0009507);;cellular_component:plastid(GO:0009536);;cellular_component:intracellular ribonucleoprotein complex(GO:0030529);;molecular_function:RNA binding(GO:0003723);;biological_process:mRNA processing(GO:0006397);;cellular_component:chloroplast(GO:0009507)	-	15368.BRADI1G20440.1|-79.8|COG0724|S|Rna-binding protein	-	Q9ZUU4|CP29B_ARATH|-74.6|RNA-binding protein CP29B, chloroplastic OS=Arabidopsis thaliana GN=CP29B PE=1 SV=1	ONK65273.1|-89.6|uncharacterized protein A4U43_C07F35440 [Asparagus officinalis]
c173102_g1	cluster 2	2.29735	0.000182931	0.00438025	up	1.81961	1.88254e-05	0.00366943	up	-	-	-	-	-	-	-	-	-	-
c173105_g2	cluster 1	-	-	-	-	1.14322	0.000769681	0.00854632	up	-	-	-	-	cellular_component:chloroplast(GO:0009507);;cellular_component:chloroplast(GO:0009507);;cellular_component:plastid(GO:0009536)	-	4641.GSMUA_Achr5P22880_001|-180.1|ENOG410Z7Z7|S|Pentatricopeptide repeat-containing protein	-	Q9SV96|PP358_ARATH|-154.8|Pentatricopeptide repeat-containing protein At4g39620, chloroplastic OS=Arabidopsis thaliana GN=EMB2453 PE=2 SV=1	XP_020257348.1|-197.4|pentatricopeptide repeat-containing protein At4g39620, chloroplastic [Asparagus officinalis]
c173689_g1	cluster 1	2.91119	4.69731e-06	0.00243519	up	2.09825	0.000194504	0.00549715	up	-	-	-	-	cellular_component:chloroplast(GO:0009507);;cellular_component:plastid(GO:0009536);;molecular_function:rRNA binding(GO:0019843);;cellular_component:intracellular ribonucleoprotein complex(GO:0030529);;molecular_function:RNA binding(GO:0003723);;cellular_component:ribosome(GO:0005840);;cellular_component:chloroplast(GO:0009507)	pda:103712792|-82.7|K02867|RP-L11, MRPL11, rplK; large subunit ribosomal protein L11|ko03010|Ribosome;;	4641.GSMUA_Achr4P30140_001|-81.8|COG0080|J|This protein binds directly to 23S ribosomal RNA (By similarity)	-	Q9MAP3|RK11_ARATH|-78.7|50S ribosomal protein L11, chloroplastic OS=Arabidopsis thaliana GN=RPL11 PE=2 SV=1	XP_020261805.1|-84.4|uncharacterized protein LOC109837851 [Asparagus officinalis]
c173796_g1	cluster 2	-	-	-	-	-	-	-	-	-	-	-	-	-	-	-	-	-	-
c173796_g2	cluster 4	1.78726	1.20407e-05	0.00296145	up	-	-	-	-	-	-	-	-	-	-	-	-	-	-
c173904_g1	cluster 3	-	-	-	-	-1.12648	0.00155439	0.0115384	down	-	-	-	-	cellular_component:plastid(GO:0009536);;biological_process:lipid catabolic process(GO:0016042);;molecular_function:hydrolase activity(GO:0016787);;biological_process:lipid metabolic process(GO:0006629);;cellular_component:chloroplast(GO:0009507);;cellular_component:chloroplast(GO:0009507)	-	29760.VIT_07s0141g00360.t01|-148.0|ENOG410XP1I|S|galactolipase activity	-	Q3EBR6|PLA16_ARATH|-137.3|Phospholipase A1-Igamma2, chloroplastic OS=Arabidopsis thaliana GN=At2g30550 PE=1 SV=2	XP_010927018.1|-160.8|PREDICTED: phospholipase A1-Igamma1, chloroplastic-like [Elaeis guineensis]
c174432_g1	cluster 2	1.66975	0.000191781	0.00441608	up	1.19347	0.000348578	0.00652989	up	-	-	-	-	molecular_function:hydrolase activity(GO:0016787);;cellular_component:membrane(GO:0016020);;cellular_component:membrane(GO:0016020);;cellular_component:integral component of membrane(GO:0016021)	mus:103984677|-135.1|K18693|DPP1; diacylglycerol diphosphate phosphatase / phosphatidate phosphatase [EC:3.1.3.81 3.1.3.4]|ko00564|Glycerophospholipid metabolism;;ko00561|Glycerolipid metabolism;;	4641.GSMUA_Achr5P09970_001|-136.4|COG0671|I|PHOsphatase	-	Q9XI60|LPP2_ARATH|-121.4|Lipid phosphate phosphatase 2 OS=Arabidopsis thaliana GN=LPP2 PE=2 SV=1	AIZ68191.1|-146.4|lipid phosphate phosphatase 2-like isoform X1 [Ornithogalum longebracteatum]
c174451_g1	cluster 3	-2.56475	5.50232e-06	0.00243519	down	-2.82203	5.17608e-05	0.00416175	down	-2.62078	0.00529048	0.049094	down	cellular_component:chloroplast(GO:0009507);;cellular_component:plastid(GO:0009536);;cellular_component:chloroplast stroma(GO:0009570);;biological_process:protein transport(GO:0015031);;biological_process:viral process(GO:0016032);;molecular_function:nucleotide binding(GO:0000166);;molecular_function:ATP binding(GO:0005524);;biological_process:transport(GO:0006810)	-	3694.POPTR_0022s00530.1|-10000.0|COG0443|O|Heat shock protein	PF00012.18|HSP70|1.5e-265|Hsp70 protein	Q9STW6|HSP7F_ARATH|-10000.0|Heat shock 70 kDa protein 6, chloroplastic OS=Arabidopsis thaliana GN=HSP70-6 PE=1 SV=1	XP_010087927.1|-10000.0|Stromal 70 kDa heat shock-related protein [Morus notabilis]
c174526_g1	cluster 3	-	-	-	-	-1.43984	0.0117254	0.0373042	down	-	-	-	-	biological_process:unsaturated fatty acid biosynthetic process(GO:0006636);;cellular_component:chloroplast(GO:0009507);;cellular_component:plastid(GO:0009536);;cellular_component:membrane(GO:0016020);;molecular_function:oxidoreductase activity(GO:0016491);;cellular_component:chloroplast membrane(GO:0031969);;biological_process:oxidation-reduction process(GO:0055114);;biological_process:lipid meta…	-	4641.GSMUA_Achr11P24740_001|-187.1|COG3239|I|linoleoyl-CoA desaturase activity	-	P48620|FAD3C_SESIN|-186.8|Omega-3 fatty acid desaturase, chloroplastic OS=Sesamum indicum GN=FAD7 PE=2 SV=1	KZV56578.1|-185.1|omega-3 desaturase family protein [Dorcoceras hygrometricum]
c176172_g2	cluster 1	1.38921	0.00127339	0.00963512	up	1.1939	5.54302e-05	0.00418091	up	-	-	-	-	cellular_component:chloroplast(GO:0009507);;cellular_component:chloroplast(GO:0009507);;cellular_component:plastid(GO:0009536);;molecular_function:hydrolase activity(GO:0016787);;molecular_function:manganese ion binding(GO:0030145);;molecular_function:metal ion binding(GO:0046872);;molecular_function:aminopeptidase activity(GO:0004177);;biological_process:proteolysis(GO:0006508);;molecular_functi…	bvg:104901800|-103.1|K01255|CARP, pepA; leucyl aminopeptidase [EC:3.4.11.1]|ko00480|Glutathione metabolism;;	39946.BGIOSGA005446-PA|-103.2|COG0260|E|Presumably involved in the processing and regular turnover of intracellular proteins. Catalyzes the removal of unsubstituted N-terminal amino acids from various peptides (By similarity)	PF00883.19|Peptidase_M17|4.4e-82|Cytosol aminopeptidase family, catalytic domain	Q6K669|AMPL2_ORYSJ|-104.3|Leucine aminopeptidase 2, chloroplastic OS=Oryza sativa subsp. japonica GN=Os02g0794700 PE=2 SV=1	XP_020265745.1|-102.7|leucine aminopeptidase 1-like [Asparagus officinalis]
c176328_g1	cluster 2	2.37085	0.000234783	0.00470441	up	2.25985	0.000432854	0.00700535	up	-	-	-	-	molecular_function:ATP binding(GO:0005524);;biological_process:lipid metabolic process(GO:0006629);;biological_process:fatty acid metabolic process(GO:0006631);;biological_process:fatty acid biosynthetic process(GO:0006633);;cellular_component:chloroplast(GO:0009507);;cellular_component:chloroplast(GO:0009507);;cellular_component:plastid(GO:0009536);;molecular_function:ligase activity(GO:0016874)…	egu:105049274|-264.3|K01961|accC; acetyl-CoA carboxylase, biotin carboxylase subunit [EC:6.4.1.2 6.3.4.14]|ko01200|Carbon metabolism;;ko00061|Fatty acid biosynthesis;;ko00620|Pyruvate metabolism;;ko00640|Propanoate metabolism;;ko01212|Fatty acid metabolism;;	4641.GSMUA_Achr8P24640_001|-261.0|COG0439|I|acetyl-CoA carboxylase biotin carboxylase	PF02786.15|CPSase_L_D2|7.2e-80|Carbamoyl-phosphate synthase L chain, ATP binding domain	B9N843|ACCC2_POPTR|-256.5|Biotin carboxylase 2, chloroplastic OS=Populus trichocarpa GN=POPTR_0018s14250g PE=2 SV=2	XP_020242437.1|-268.0|biotin carboxylase 1, chloroplastic [Asparagus officinalis]
c176474_g1	cluster 1	1.31106	0.00214719	0.0126979	up	1.19762	0.00174989	0.0121643	up	-	-	-	-	molecular_function:anthranilate synthase activity(GO:0004049);;molecular_function:anthranilate synthase activity(GO:0004049);;cellular_component:anthranilate synthase complex(GO:0005950);;biological_process:cellular amino acid biosynthetic process(GO:0008652);;biological_process:aromatic amino acid family biosynthetic process(GO:0009073);;cellular_component:chloroplast(GO:0009507);;cellular_compo…	mus:103997186|-260.1|K01657|trpE; anthranilate synthase component I [EC:4.1.3.27]|ko01230|Biosynthesis of amino acids;;ko00400|Phenylalanine, tyrosine and tryptophan biosynthesis;;	4641.GSMUA_Achr9P07690_001|-257.7|COG0147|E|synthase (Component I)	PF00425.16|Chorismate_bind|1.7e-85|chorismate binding enzyme	Q9XJ29|ASA2_ORYSJ|-242.0|Anthranilate synthase alpha subunit 2, chloroplastic OS=Oryza sativa subsp. japonica GN=OsASA2 PE=1 SV=1	XP_020250357.1|-270.3|anthranilate synthase alpha subunit 1, chloroplastic-like, partial [Asparagus officinalis]
c176815_g1	cluster 1	1.70209	0.00115029	0.00917739	up	1.82876	0.00170624	0.0120296	up	-	-	-	-	cellular_component:chloroplast(GO:0009507);;cellular_component:plastid(GO:0009536);;molecular_function:nucleotide binding(GO:0000166);;molecular_function:ATP binding(GO:0005524);;cellular_component:chloroplast(GO:0009507)	-	4641.GSMUA_Achr10P20970_001|-235.3|COG0459|O|Prevents misfolding and promotes the refolding and proper assembly of unfolded polypeptides generated under stress conditions (By similarity)	PF00118.22|Cpn60_TCP1|2.1e-95|TCP-1/cpn60 chaperonin family	Q56XV8|CPNA2_ARATH|-202.1|Chaperonin 60 subunit alpha 2, chloroplastic OS=Arabidopsis thaliana GN=CPN60A2 PE=2 SV=1	XP_020243759.1|-257.2|ruBisCO large subunit-binding protein subunit alpha-like [Asparagus officinalis]
c176951_g1	cluster 1	1.76669	0.000308525	0.00520138	up	1.59879	0.000292994	0.00626608	up	1.19881	0.00125879	0.0297187	up	cellular_component:mitochondrion(GO:0005739);;cellular_component:mitochondrion(GO:0005739);;cellular_component:chloroplast(GO:0009507);;cellular_component:chloroplast(GO:0009507);;cellular_component:plastid(GO:0009536);;molecular_function:kinase activity(GO:0016301);;biological_process:phosphorylation(GO:0016310);;molecular_function:transferase activity(GO:0016740);;molecular_function:nucleotide …	pda:103713860|-105.0|K00942|E2.7.4.8, gmk; guanylate kinase [EC:2.7.4.8]|ko00230|Purine metabolism;;	39947.LOC_Os03g20460.1|-99.7|COG0194|F|Essential for recycling GMP and indirectly, cGMP (By similarity)	-	Q10M74|GMK2_ORYSJ|-100.9|Guanylate kinase 2, chloroplastic/mitochondrial OS=Oryza sativa subsp. japonica GN=V2 PE=1 SV=1	XP_020249908.1|-104.9|guanylate kinase 2, chloroplastic/mitochondrial [Asparagus officinalis]
c177005_g1	cluster 2	1.76828	0.000136645	0.00413378	up	1.34704	0.000972009	0.00945133	up	-	-	-	-	cellular_component:chloroplast(GO:0009507);;cellular_component:chloroplast(GO:0009507);;cellular_component:plastid(GO:0009536)	-	4641.GSMUA_Achr3P08150_001|-143.9|COG0740|O|Cleaves peptides in various proteins in a process that requires ATP hydrolysis. Has a chymotrypsin-like activity. Plays a major role in the degradation of misfolded proteins (By similarity)	-	Q8L770|CLPR3_ARATH|-132.7|ATP-dependent Clp protease proteolytic subunit-related protein 3, chloroplastic OS=Arabidopsis thaliana GN=CLPR3 PE=1 SV=1	ONK68250.1|-157.9|uncharacterized protein A4U43_C05F9290 [Asparagus officinalis]
c177356_g1	cluster 4	1.06455	0.00140581	0.0100983	up	-	-	-	-	-	-	-	-	molecular_function:peptidase activity(GO:0008233);;cellular_component:chloroplast(GO:0009507);;cellular_component:plastid(GO:0009536);;cellular_component:chloroplast stroma(GO:0009570);;molecular_function:hydrolase activity(GO:0016787);;cellular_component:intracellular ribonucleoprotein complex(GO:0030529);;molecular_function:protein binding(GO:0005515);;cellular_component:ribosome(GO:0005840);;b…	-	4641.GSMUA_Achr9P15530_001|-65.1|COG2127|O|protein catabolic process	-	Q9SX29|CLPS1_ARATH|-60.8|ATP-dependent Clp protease adapter protein CLPS1, chloroplastic OS=Arabidopsis thaliana GN=CPLS1 PE=1 SV=1	XP_020275623.1|-66.6|ATP-dependent Clp protease adapter protein CLPS1, chloroplastic [Asparagus officinalis]
c177445_g1	cluster 1	1.00963	0.00747458	0.026802	up	-	-	-	-	-	-	-	-	-	-	-	-	-	-
c177445_g2	cluster 4	1.46983	0.000200124	0.00447541	up	-	-	-	-	-	-	-	-	biological_process:fatty acid biosynthetic process(GO:0006633);;biological_process:fatty acid biosynthetic process(GO:0006633);;cellular_component:chloroplast(GO:0009507);;cellular_component:chloroplast(GO:0009507);;cellular_component:plastid(GO:0009536);;molecular_function:myristoyl-[acyl-carrier-protein] hydrolase activity(GO:0016295);;molecular_function:palmitoyl-[acyl-carrier-protein] hydrola…	pda:103716139|-95.3|K10782|FATA; fatty acyl-ACP thioesterase A [EC:3.1.2.14]|ko00061|Fatty acid biosynthesis;;	4641.GSMUA_Achr8P08690_001|-92.2|COG3884|I|acyl-ACP thioesterase	PF01643.15|Acyl-ACP_TE|4.5e-68|Acyl-ACP thioesterase	Q9SV64|FATA2_ARATH|-86.5|Oleoyl-acyl carrier protein thioesterase 2, chloroplastic OS=Arabidopsis thaliana GN=FATA2 PE=2 SV=1	XP_020260966.1|-96.6|oleoyl-acyl carrier protein thioesterase 1, chloroplastic-like [Asparagus officinalis]
c177760_g1	cluster 1	1.15238	0.00593302	0.0230259	up	1.21066	0.000829272	0.0088394	up	-	-	-	-	cellular_component:chloroplast(GO:0009507);;cellular_component:plastid(GO:0009536);;cellular_component:chloroplast stroma(GO:0009570)	-	4641.GSMUA_Achr4P09860_001|-70.5|COG0799|S|Functions as a ribosomal silencing factor. Interacts with ribosomal protein L14 (rplN), blocking formation of intersubunit bridge B8. Prevents association of the 30S and 50S ribosomal subunits and the formation of functional ribosomes, thus repressing translation (By similarity)	-	Q9LDY9|IOJAC_ARATH|-63.4|Protein Iojap, chloroplastic OS=Arabidopsis thaliana GN=IJ PE=2 SV=1	XP_020266486.1|-78.2|protein Iojap, chloroplastic [Asparagus officinalis]
c177787_g1	cluster 1	2.46951	6.36864e-06	0.00243519	up	2.29092	0.000214896	0.00566371	up	1.71887	0.00196141	0.0337911	up	-	-	-	-	-	-
c178003_g1	cluster 4	1.68513	0.000593024	0.00677619	up	1.16447	0.00408492	0.019356	up	-	-	-	-	-	-	4641.GSMUA_Achr11P17300_001|-83.0|COG0724|S|Rna-binding protein	-	-	XP_009384070.1|-81.0|PREDICTED: nucleolin 1 [Musa acuminata subsp. malaccensis]
c178420_g1	cluster 1	2.32049	9.14197e-06	0.00272205	up	2.1204	0.000211591	0.00563336	up	1.601	2.96928e-05	0.0164942	up	molecular_function:ATP binding(GO:0005524);;cellular_component:mitochondrion(GO:0005739);;cellular_component:mitochondrion(GO:0005739);;biological_process:translation(GO:0006412);;cellular_component:chloroplast(GO:0009507);;cellular_component:chloroplast(GO:0009507);;cellular_component:plastid(GO:0009536);;molecular_function:ligase activity(GO:0016874);;molecular_function:metal ion binding(GO:004…	egu:105038938|-10000.0|K01868|TARS, thrS; threonyl-tRNA synthetase [EC:6.1.1.3]|ko00970|Aminoacyl-tRNA biosynthesis;;	3694.POPTR_0014s16030.1|-309.4|COG0441|J|threonine-tRNA ligase activity	-	F4IFC5|SYTM2_ARATH|-308.2|Threonine--tRNA ligase, chloroplastic/mitochondrial 2 OS=Arabidopsis thaliana GN=EMB2761 PE=2 SV=1	XP_020267742.1|-10000.0|threonine--tRNA ligase, chloroplastic/mitochondrial 2 [Asparagus officinalis]
c178995_g1	cluster 3	-	-	-	-	-1.49493	0.000619023	0.00792336	down	-1.31601	0.000823116	0.0263501	down	-	-	-	-	-	XP_020269692.1|-58.5|pentatricopeptide repeat-containing protein At2g30100, chloroplastic [Asparagus officinalis]
c179247_g1	cluster 2	2.11801	0.000115395	0.00401207	up	2.00794	0.000119148	0.00492875	up	-	-	-	-	-	-	4641.GSMUA_Achr3P10760_001|-199.4|ENOG410Y7DR|S|set domain containing	-	-	XP_008802701.1|-202.8|PREDICTED: ribulose-1,5 bisphosphate carboxylase/oxygenase large subunit N-methyltransferase, chloroplastic isoform X1 [Phoenix dactylifera]
c180027_g1	cluster 2	1.0587	0.000741362	0.00747414	up	-	-	-	-	-	-	-	-	-	-	-	-	-	-
c180658_g1	cluster 2	1.29083	0.000320538	0.00524466	up	-	-	-	-	-	-	-	-	cellular_component:chloroplast(GO:0009507);;cellular_component:chloroplast(GO:0009507);;cellular_component:plastid(GO:0009536)	-	59689.fgenesh2_kg.7__2605__AT4G17040.1|-120.8|COG0740|O|Cleaves peptides in various proteins in a process that requires ATP hydrolysis. Has a chymotrypsin-like activity. Plays a major role in the degradation of misfolded proteins (By similarity)	-	Q8LB10|CLPR4_ARATH|-120.8|ATP-dependent Clp protease proteolytic subunit-related protein 4, chloroplastic OS=Arabidopsis thaliana GN=CLPR4 PE=1 SV=1	XP_020242429.1|-136.9|ATP-dependent Clp protease proteolytic subunit-related protein 4, chloroplastic [Asparagus officinalis]
c180809_g1	cluster 4	-	-	-	-	-	-	-	-	-1.20258	0.000128955	0.0194927	down	-	-	-	-	-	-
c181320_g1	cluster 2	2.28881	0.0115362	0.0357283	up	1.66928	0.00456378	0.0206771	up	-	-	-	-	cellular_component:integral component of membrane(GO:0016021);;biological_process:carotenoid biosynthetic process(GO:0016117);;molecular_function:oxidoreductase activity(GO:0016491);;molecular_function:hydrolase activity(GO:0016787);;cellular_component:chloroplast membrane(GO:0031969);;molecular_function:metal ion binding(GO:0046872);;biological_process:oxidation-reduction process(GO:0055114);;ce…	mus:103970270|-109.8|K15746|crtZ; beta-carotene 3-hydroxylase [EC:1.14.13.129]|ko00906|Carotenoid biosynthesis;;	4641.GSMUA_Achr11P02930_001|-111.0|ENOG4111G77|S|Beta-carotene hydroxylase	-	Q9SZZ8|BCH1_ARATH|-110.2|Beta-carotene 3-hydroxylase 1, chloroplastic OS=Arabidopsis thaliana GN=BETA-OHASE 1 PE=1 SV=1	XP_009382258.1|-109.0|PREDICTED: beta-carotene 3-hydroxylase 2, chloroplastic [Musa acuminata subsp. malaccensis]
c181416_g1	cluster 2	2.62911	0.000248723	0.00480384	up	2.02347	0.00156909	0.0115812	up	1.43501	0.00223767	0.0355406	up	-	-	-	-	-	-
c181457_g1	cluster 1	1.96736	0.00235927	0.0133542	up	1.39429	0.00211594	0.013451	up	1.38142	0.00249389	0.0370277	up	-	-	-	-	-	-
c181634_g1	cluster 2	1.11775	0.00151744	0.0105336	up	1.04199	0.00186416	0.012532	up	-	-	-	-	biological_process:glycolytic process(GO:0006096);;biological_process:glycolytic process(GO:0006096);;cellular_component:chloroplast(GO:0009507);;cellular_component:chloroplast(GO:0009507);;cellular_component:plastid(GO:0009536);;molecular_function:kinase activity(GO:0016301);;biological_process:phosphorylation(GO:0016310);;molecular_function:transferase activity(GO:0016740);;molecular_function:m…	pda:103706435|-237.0|K00873|PK, pyk; pyruvate kinase [EC:2.7.1.40]|ko01200|Carbon metabolism;;ko00620|Pyruvate metabolism;;ko00230|Purine metabolism;;ko01230|Biosynthesis of amino acids;;ko00010|Glycolysis / Gluconeogenesis;;	4641.GSMUA_Achr8P14820_001|-230.9|COG0469|G|Pyruvate kinase	PF00224.19|PK|1.6e-117|Pyruvate kinase, barrel domain	Q40546|KPYG_TOBAC|-222.8|Pyruvate kinase isozyme G, chloroplastic OS=Nicotiana tabacum PE=2 SV=1	XP_020244151.1|-260.0|pyruvate kinase isozyme G, chloroplastic-like [Asparagus officinalis]
c181637_g1	cluster 2	1.12321	0.000711927	0.00733415	up	-	-	-	-	-	-	-	-	cellular_component:membrane(GO:0016020);;cellular_component:membrane(GO:0016020);;cellular_component:integral component of membrane(GO:0016021);;cellular_component:chloroplast(GO:0009507);;cellular_component:chloroplast(GO:0009507);;cellular_component:plastid(GO:0009536)	-	4641.GSMUA_Achr11P08930_001|-86.7|ENOG410YFAD|S|NA	-	Q56XR7|STR4A_ARATH|-56.8|Rhodanese-like domain-containing protein 4A, chloroplastic OS=Arabidopsis thaliana GN=STR4A PE=2 SV=1	XP_010908500.1|-97.2|PREDICTED: rhodanese-like domain-containing protein 4A, chloroplastic [Elaeis guineensis]
c182177_g1	cluster 2	2.96233	0.00525542	0.0214236	up	-	-	-	-	-	-	-	-	cellular_component:chloroplast(GO:0009507);;cellular_component:chloroplast(GO:0009507);;cellular_component:plastid(GO:0009536);;molecular_function:transferase activity(GO:0016740);;molecular_function:metal ion binding(GO:0046872);;biological_process:1-deoxy-D-xylulose 5-phosphate biosynthetic process(GO:0052865);;biological_process:isoprenoid biosynthetic process(GO:0008299);;molecular_function:1…	egu:105053930|-10000.0|K01662|dxs; 1-deoxy-D-xylulose-5-phosphate synthase [EC:2.2.1.7]|ko00730|Thiamine metabolism;;ko00900|Terpenoid backbone biosynthesis;;	4641.GSMUA_Achr5P24730_001|-10000.0|COG1154|H|Catalyzes the acyloin condensation reaction between C atoms 2 and 3 of pyruvate and glyceraldehyde 3-phosphate to yield 1-deoxy-D-xylulose-5-phosphate (DXP) (By similarity)	PF13292.4|DXP_synthase_N|5.2e-113|1-deoxy-D-xylulose-5-phosphate synthase	Q6YU51|DXS2_ORYSJ|-10000.0|Probable 1-deoxy-D-xylulose-5-phosphate synthase 2, chloroplastic OS=Oryza sativa subsp. japonica GN=Os07g0190000 PE=2 SV=1	XP_020257260.1|-10000.0|probable 1-deoxy-D-xylulose-5-phosphate synthase 2, chloroplastic isoform X1 [Asparagus officinalis]
c182596_g1	cluster 4	2.93443	0.000216978	0.00457451	up	2.0457	0.00188706	0.0126119	up	1.21342	0.00192484	0.0336719	up	cellular_component:plastid(GO:0009536);;cellular_component:chloroplast stroma(GO:0009570);;molecular_function:isomerase activity(GO:0016853);;molecular_function:peptidyl-prolyl cis-trans isomerase activity(GO:0003755);;molecular_function:peptidyl-prolyl cis-trans isomerase activity(GO:0003755);;cellular_component:chloroplast(GO:0009507)	-	3847.GLYMA19G41050.1|-86.2|ENOG410Z0G4|O|PPIases accelerate the folding of proteins (By similarity)	-	P34791|CP20C_ARATH|-76.4|Peptidyl-prolyl cis-trans isomerase CYP20-3, chloroplastic OS=Arabidopsis thaliana GN=CYP20-3 PE=1 SV=1	XP_021280252.1|-88.5|peptidyl-prolyl cis-trans isomerase [Herrania umbratica]
c183556_g1	cluster 3	-	-	-	-	-1.08112	0.00252768	0.0148196	down	-	-	-	-	cellular_component:chloroplast(GO:0009507);;cellular_component:chloroplast(GO:0009507);;cellular_component:plastid(GO:0009536);;molecular_function:hydrolase activity(GO:0016787);;molecular_function:metal ion binding(GO:0046872);;molecular_function:nucleotide binding(GO:0000166);;molecular_function:RNA binding(GO:0003723);;molecular_function:nuclease activity(GO:0004518)	-	4641.GSMUA_Achr9P27500_001|-202.9|ENOG410ZAFR|S|Ribonuclease that specifically degrades pre-mRNAs with a defective 5' end cap and is part of a pre-mRNA capping quality control. Has decapping and pyrophosphohydrolase activities. Has decapping activity toward incomplete 5' end cap mRNAs such as unmethylated 5' end-capped RNA to release GpppN and 5' end monophosphate RNA. Also possesses RNA 5'-pyrop…	-	Q8RY73|DXO_ARATH|-176.7|Decapping nuclease DXO homolog, chloroplastic OS=Arabidopsis thaliana GN=At4g17620 PE=1 SV=1	XP_020242553.1|-214.0|decapping nuclease DXO homolog, chloroplastic [Asparagus officinalis]
c184295_g1	cluster 2	1.96667	0.0039594	0.0179716	up	1.68363	0.00479736	0.0213259	up	-	-	-	-	-	-	4555.Si017363m|-76.4|ENOG4110KNI|S|FAD binding domain	-	-	XP_020246381.1|-149.2|uncharacterized protein LOC109824247 [Asparagus officinalis]
c184545_g1	cluster 1	-	-	-	-	1.40572	0.000457464	0.0071002	up	1.07148	0.00228377	0.0357317	up	molecular_function:ATP binding(GO:0005524);;molecular_function:ATP binding(GO:0005524);;biological_process:glutathione biosynthetic process(GO:0006750);;biological_process:glutathione biosynthetic process(GO:0006750);;cellular_component:chloroplast(GO:0009507);;cellular_component:chloroplast(GO:0009507);;cellular_component:plastid(GO:0009536);;molecular_function:ligase activity(GO:0016874);;molec…	egu:105052710|-200.9|K01920|gshB; glutathione synthase [EC:6.3.2.3]|ko00480|Glutathione metabolism;;ko00270|Cysteine and methionine metabolism;;	4641.GSMUA_Achr11P19030_001|-193.0|ENOG410XPHH|I|glutathione synthetase	PF03917.15|GSH_synth_ATP|1.3e-134|Eukaryotic glutathione synthase, ATP binding domain	O23732|GSHB_BRAJU|-186.8|Glutathione synthetase, chloroplastic OS=Brassica juncea GN=GSH2 PE=2 SV=1	XP_020254706.1|-209.0|glutathione synthetase, chloroplastic-like isoform X6 [Asparagus officinalis]
c184850_g1	cluster 1	1.51821	0.00410254	0.0183556	up	1.19943	0.00558134	0.0232626	up	-	-	-	-	cellular_component:chloroplast(GO:0009507);;cellular_component:chloroplast(GO:0009507);;cellular_component:plastid(GO:0009536)	-	4577.GRMZM2G052479_P01|-79.7|ENOG410YFY9|O|family with sequence similarity 213, member	-	Q9ZUU2|AAED1_ARATH|-74.3|Thioredoxin-like protein AAED1, chloroplastic OS=Arabidopsis thaliana GN=At2g37240 PE=1 SV=2	XP_020271483.1|-84.2|thioredoxin-like protein AAED1, chloroplastic [Asparagus officinalis]
c184973_g1	cluster 3	-	-	-	-	-1.63359	0.000436239	0.00700535	down	-	-	-	-	biological_process:branched-chain amino acid biosynthetic process(GO:0009082);;biological_process:isoleucine biosynthetic process(GO:0009097);;biological_process:leucine biosynthetic process(GO:0009098);;biological_process:valine biosynthetic process(GO:0009099);;cellular_component:chloroplast(GO:0009507);;cellular_component:chloroplast(GO:0009507);;cellular_component:plastid(GO:0009536);;molecul…	egu:105058186|-128.8|K00826|E2.6.1.42, ilvE; branched-chain amino acid aminotransferase [EC:2.6.1.42]|ko00290|Valine, leucine and isoleucine biosynthesis;;ko00770|Pantothenate and CoA biosynthesis;;ko00280|Valine, leucine and isoleucine degradation;;ko01210|2-Oxocarboxylic acid metabolism;;ko01230|Biosynthesis of amino acids;;ko00270|Cysteine and methionine metabolism;;	4641.GSMUA_Achr3P15170_001|-127.9|COG0115|E|brancheD-chain amino acid aminotransferase	-	Q9M439|BCAT2_ARATH|-119.3|Branched-chain-amino-acid aminotransferase 2, chloroplastic OS=Arabidopsis thaliana GN=BCAT2 PE=1 SV=1	XP_020257892.1|-130.3|branched-chain-amino-acid aminotransferase 5, chloroplastic-like isoform X1 [Asparagus officinalis]
c185030_g1	cluster 2	1.11215	5.53651e-05	0.00351314	up	1.20925	0.000271784	0.00613984	up	-	-	-	-	cellular_component:chloroplast(GO:0009507);;cellular_component:chloroplast(GO:0009507);;cellular_component:plastid(GO:0009536)	-	4641.GSMUA_Achr4P29610_001|-112.1|COG0666|S|Ankyrin Repeat	-	Q05753|AKRP_ARATH|-90.0|Ankyrin repeat domain-containing protein, chloroplastic OS=Arabidopsis thaliana GN=AKRP PE=1 SV=2	XP_008785067.1|-124.9|PREDICTED: ankyrin repeat domain-containing protein, chloroplastic isoform X2 [Phoenix dactylifera]
c185502_g1	cluster 4	1.9327	8.69447e-05	0.0037683	up	1.15174	0.00130417	0.0107161	up	-	-	-	-	-	-	-	-	-	-
c185622_g1	cluster 1	2.58845	7.9387e-05	0.0036699	up	2.48124	0.000719417	0.0083179	up	-	-	-	-	cellular_component:chloroplast(GO:0009507);;cellular_component:chloroplast thylakoid membrane(GO:0009535);;cellular_component:plastid(GO:0009536);;cellular_component:thylakoid(GO:0009579);;biological_process:photosynthesis(GO:0015979);;biological_process:proton transport(GO:0015992);;cellular_component:membrane(GO:0016020);;cellular_component:proton-transporting ATP synthase complex, catalytic co…	pda:103715263|-73.5|K02113|ATPF1D, atpH; F-type H+-transporting ATPase subunit delta|ko00190|Oxidative phosphorylation;;ko00195|Photosynthesis;;	4641.GSMUA_Achr9P13040_001|-72.7|COG0712|C|F(1)F(0) ATP synthase produces ATP from ADP in the presence of a proton or sodium gradient. F-type ATPases consist of two structural domains, F(1) containing the extramembraneous catalytic core and F(0) containing the membrane proton channel, linked together by a central stalk and a peripheral stalk. During catalysis, ATP synthesis in the catalytic domai…	-	Q9SSS9|ATPD_ARATH|-67.5|ATP synthase subunit delta, chloroplastic OS=Arabidopsis thaliana GN=ATPD PE=1 SV=1	OAY79289.1|-75.8|ATP synthase delta chain, chloroplastic [Ananas comosus]
c185968_g1	cluster 2	2.06912	0.000464818	0.00612799	up	1.5503	0.000926791	0.00923928	up	1.25236	0.00467339	0.0469124	up	biological_process:fatty acid biosynthetic process(GO:0006633);;biological_process:fatty acid biosynthetic process(GO:0006633);;cellular_component:chloroplast(GO:0009507);;cellular_component:chloroplast(GO:0009507);;cellular_component:plastid(GO:0009536);;cellular_component:plastid(GO:0009536);;molecular_function:oxidoreductase activity(GO:0016491);;biological_process:oxidation-reduction process(…	bvg:104893514|-108.8|K00059|fabG; 3-oxoacyl-[acyl-carrier protein] reductase [EC:1.1.1.100]|ko00061|Fatty acid biosynthesis;;ko01040|Biosynthesis of unsaturated fatty acids;;ko01212|Fatty acid metabolism;;ko00780|Biotin metabolism;;	15368.BRADI5G07220.1|-109.6|COG1028|S|Dehydrogenase reductase	PF13561.4|adh_short_C2|4.4e-66|Enoyl-(Acyl carrier protein) reductase	P28643|FABG_CUPLA|-109.5|3-oxoacyl-[acyl-carrier-protein] reductase, chloroplastic OS=Cuphea lanceolata GN=CLKR27 PE=2 SV=1	XP_020254632.1|-113.2|3-oxoacyl-[acyl-carrier-protein] reductase 4-like [Asparagus officinalis]
c186154_g1	cluster 1	2.00248	0.00052135	0.00641231	up	1.84381	0.000756841	0.00847724	up	1.49337	0.00174197	0.0326367	up	biological_process:FAD biosynthetic process(GO:0006747);;cellular_component:chloroplast(GO:0009507);;cellular_component:chloroplast(GO:0009507);;cellular_component:plastid(GO:0009536);;molecular_function:transferase activity(GO:0016740);;molecular_function:nucleotidyltransferase activity(GO:0016779);;molecular_function:nucleotide binding(GO:0000166);;molecular_function:FMN adenylyltransferase act…	-	4641.GSMUA_Achr10P08850_001|-100.8|COG0196|H|riboflavin biosynthesis protein ribF	-	Q10BX9|RIBF_ORYSJ|-95.6|FAD synthetase, chloroplastic OS=Oryza sativa subsp. japonica GN=RIBF PE=3 SV=1	XP_020263661.1|-124.7|FAD synthetase, chloroplastic-like [Asparagus officinalis]
c186286_g1	cluster 3	-	-	-	-	-	-	-	-	-	-	-	-	-	-	-	-	-	-
c186381_g1	cluster 1	1.65794	0.00215736	0.0127309	up	1.43968	0.00437175	0.0201326	up	-	-	-	-	cellular_component:chloroplast(GO:0009507);;cellular_component:chloroplast(GO:0009507);;cellular_component:plastid(GO:0009536);;molecular_function:kinase activity(GO:0016301);;biological_process:phosphorylation(GO:0016310);;molecular_function:transferase activity(GO:0016740);;biological_process:reductive pentose-phosphate cycle(GO:0019253);;biological_process:reductive pentose-phosphate cycle(GO:…	gra:105782676|-128.1|K00927|PGK, pgk; phosphoglycerate kinase [EC:2.7.2.3]|ko00710|Carbon fixation in photosynthetic organisms;;ko01200|Carbon metabolism;;ko01230|Biosynthesis of amino acids;;ko00010|Glycolysis / Gluconeogenesis;;	4641.GSMUA_Achr4P33150_001|-129.0|COG0126|G|phosphoglycerate kinase	PF00162.17|PGK|5.5e-98|Phosphoglycerate kinase	Q42961|PGKH_TOBAC|-128.7|Phosphoglycerate kinase, chloroplastic OS=Nicotiana tabacum PE=2 SV=1	XP_020256648.1|-129.0|phosphoglycerate kinase, chloroplastic [Asparagus officinalis]
c186396_g1	cluster 3	-2.73061	0.00021911	0.00459125	down	-3.01606	0.000648533	0.00802065	down	-3.95479	0.000472273	0.0232571	down	-	-	-	-	-	-
c187086_g1	cluster 4	1.33447	0.00124362	0.00954088	up	-	-	-	-	-	-	-	-	cellular_component:chloroplast(GO:0009507);;cellular_component:chloroplast(GO:0009507);;cellular_component:plastid(GO:0009536)	-	4538.ORGLA09G0135200.1|-85.7|ENOG4111JU1|S|Rhodanese-like domain containing protein	-	Q94A65|STR14_ARATH|-79.6|Rhodanese-like domain-containing protein 14, chloroplastic OS=Arabidopsis thaliana GN=At4g27700 PE=2 SV=1	XP_020242446.1|-84.7|rhodanese-like domain-containing protein 14, chloroplastic [Asparagus officinalis]
c187147_g1	cluster 1	2.32818	8.48398e-07	0.00185868	up	1.85573	0.000314603	0.00635057	up	1.97349	0.00277607	0.0387968	up	molecular_function:RNA binding(GO:0003723);;cellular_component:mitochondrion(GO:0005739);;cellular_component:mitochondrion(GO:0005739);;cellular_component:mitochondrion(GO:0005739);;biological_process:transcription, DNA-templated(GO:0006351);;biological_process:DNA-templated transcription, termination(GO:0006353);;biological_process:regulation of transcription, DNA-templated(GO:0006355);;biologic…	-	4641.GSMUA_AchrUn_randomP11950_001|-115.4|ENOG410XT49|S|mitochondrial transcription termination	PF02536.12|mTERF|4.5e-61|mTERF	Q9SZL6|MTEF6_ARATH|-109.3|Transcription termination factor MTERF6, chloroplastic/mitochondrial OS=Arabidopsis thaliana GN=MTERF6 PE=2 SV=1	ONK81869.1|-124.7|uncharacterized protein A4U43_C01F33700 [Asparagus officinalis]
c187223_g1	cluster 1	2.24017	0.00126883	0.00961879	up	2.05447	0.00188078	0.0125924	up	1.65461	0.00364897	0.042645	up	cellular_component:plastid(GO:0009536);;cellular_component:chloroplast stroma(GO:0009570);;biological_process:chlorophyll biosynthetic process(GO:0015995);;molecular_function:protein binding(GO:0005515);;biological_process:heme biosynthetic process(GO:0006783);;cellular_component:chloroplast(GO:0009507)	-	4641.GSMUA_Achr1P10250_001|-94.2|ENOG410XX7U|S|NA	-	Q9LU39|GLUBP_ARATH|-73.8|Glutamyl-tRNA reductase-binding protein, chloroplastic OS=Arabidopsis thaliana GN=GLUTRBP PE=1 SV=1	XP_020267985.1|-102.0|glutamyl-tRNA reductase-binding protein, chloroplastic [Asparagus officinalis]
c187337_g1	cluster 2	1.88367	0.00133522	0.00983876	up	1.60313	0.0028025	0.0157099	up	-	-	-	-	cellular_component:plastid(GO:0009536);;molecular_function:oxidoreductase activity(GO:0016491);;biological_process:oxidation-reduction process(GO:0055114);;molecular_function:glutathione-disulfide reductase activity(GO:0004362);;cellular_component:chloroplast(GO:0009507);;cellular_component:chloroplast(GO:0009507)	egu:105053424|-247.4|K00383|GSR, gor; glutathione reductase (NADPH) [EC:1.8.1.7]|ko00480|Glutathione metabolism;;	4641.GSMUA_Achr3P29340_001|-238.3|COG1249|C|dihydrolipoyl dehydrogenase	PF07992.12|Pyr_redox_2|1.3e-63|Pyridine nucleotide-disulphide oxidoreductase	P80461|GSHRP_TOBAC|-234.5|Glutathione reductase, chloroplastic (Fragment) OS=Nicotiana tabacum GN=GOR PE=1 SV=1	XP_010932864.1|-246.6|PREDICTED: glutathione reductase, chloroplastic isoform X1 [Elaeis guineensis]
c188049_g1	cluster 1	1.32442	0.000627004	0.00694161	up	1.40969	0.000651961	0.00803176	up	-	-	-	-	cellular_component:chloroplast(GO:0009507);;cellular_component:plastid(GO:0009536);;cellular_component:chloroplast thylakoid lumen(GO:0009543);;cellular_component:thylakoid(GO:0009579);;biological_process:response to high light intensity(GO:0009644);;biological_process:response to high light intensity(GO:0009644);;biological_process:response to abscisic acid(GO:0009737);;biological_process:seed m…	-	3847.GLYMA02G45880.1|-110.2|COG3040|M|Outer membrane lipoprotein	-	Q9STS7|CHL_ARATH|-108.8|Chloroplastic lipocalin OS=Arabidopsis thaliana GN=CHL PE=1 SV=1	XP_009378689.1|-111.8|PREDICTED: chloroplastic lipocalin-like [Pyrus x bretschneideri]
c190157_g1	cluster 1	1.21302	3.1764e-05	0.00329604	up	1.13563	0.000160775	0.00521827	up	-	-	-	-	cellular_component:chloroplast(GO:0009507);;cellular_component:plastid(GO:0009536);;cellular_component:intracellular ribonucleoprotein complex(GO:0030529);;molecular_function:RNA binding(GO:0003723);;cellular_component:ribosome(GO:0005840);;cellular_component:chloroplast(GO:0009507)	mus:103998095|-186.8|K02945|RP-S1, rpsA; small subunit ribosomal protein S1|ko03010|Ribosome;;	4641.GSMUA_Achr9P16650_001|-188.0|COG0539|J|thus facilitating recognition of the initiation point. It is needed to translate mRNA with a short Shine-Dalgarno (SD) purine-rich sequence (By similarity)	-	P29344|RR1_SPIOL|-176.4|30S ribosomal protein S1, chloroplastic OS=Spinacia oleracea GN=RPS1 PE=1 SV=1	OAY73076.1|-189.8|30S ribosomal protein S1, chloroplastic [Ananas comosus]
c190282_g2	cluster 1	2.54803	0.000485705	0.00623729	up	2.24149	0.000746158	0.00844504	up	-	-	-	-	biological_process:nucleotide metabolic process(GO:0009117);;cellular_component:chloroplast(GO:0009507);;cellular_component:chloroplast(GO:0009507);;cellular_component:plastid(GO:0009536);;molecular_function:kinase activity(GO:0016301);;biological_process:phosphorylation(GO:0016310);;molecular_function:transferase activity(GO:0016740);;molecular_function:metal ion binding(GO:0046872);;molecular_f…	pda:103714470|-86.6|K00940|ndk, NME; nucleoside-diphosphate kinase [EC:2.7.4.6]|ko00230|Purine metabolism;;ko00240|Pyrimidine metabolism;;	4641.GSMUA_AchrUn_randomP14310_001|-85.8|COG0105|F|Major role in the synthesis of nucleoside triphosphates other than ATP. The ATP gamma phosphate is transferred to the NDP beta phosphate via a ping-pong mechanism, using a phosphorylated active-site intermediate (By similarity)	-	Q852S5|NDK2_TOBAC|-79.5|Nucleoside diphosphate kinase 2, chloroplastic OS=Nicotiana tabacum GN=NDPK2 PE=1 SV=1	XP_020260255.1|-92.8|nucleoside diphosphate kinase 2, chloroplastic [Asparagus officinalis]
c190412_g1	cluster 1	-	-	-	-	1.18208	0.000237997	0.00587053	up	-	-	-	-	biological_process:unsaturated fatty acid biosynthetic process(GO:0006636);;cellular_component:chloroplast(GO:0009507);;cellular_component:plastid(GO:0009536);;cellular_component:membrane(GO:0016020);;molecular_function:oxidoreductase activity(GO:0016491);;cellular_component:chloroplast membrane(GO:0031969);;biological_process:oxidation-reduction process(GO:0055114);;biological_process:lipid meta…	-	4641.GSMUA_AchrUn_randomP18870_001|-200.1|COG3239|I|linoleoyl-CoA desaturase activity	-	P48627|FAD6C_BRANA|-194.2|Omega-6 fatty acid desaturase, chloroplastic OS=Brassica napus PE=1 SV=1	XP_020241744.1|-202.4|omega-6 fatty acid desaturase, chloroplastic isoform X2 [Asparagus officinalis]
c190486_g1	cluster 1	1.43962	0.000130441	0.00411969	up	1.42125	0.00245435	0.0145761	up	-	-	-	-	cellular_component:chloroplast thylakoid lumen(GO:0009543);;cellular_component:chloroplast thylakoid lumen(GO:0009543);;cellular_component:thylakoid(GO:0009579);;molecular_function:molecular_function(GO:0003674);;cellular_component:chloroplast(GO:0009507);;cellular_component:plastid(GO:0009536)	-	3847.GLYMA11G34350.1|-76.4|ENOG4111W3N|S|Pentapeptide repeat-containing protein	-	O22160|TL15A_ARATH|-73.7|Thylakoid lumenal 15 kDa protein 1, chloroplastic OS=Arabidopsis thaliana GN=At2g44920 PE=1 SV=2	XP_020252478.1|-78.1|thylakoid lumenal 15 kDa protein 1, chloroplastic [Asparagus officinalis]
c190575_g1	cluster 4	1.46014	0.000202951	0.00449836	up	-	-	-	-	-	-	-	-	cellular_component:chloroplast(GO:0009507);;cellular_component:plastid(GO:0009536);;molecular_function:nucleotide binding(GO:0000166);;molecular_function:ATP binding(GO:0005524);;cellular_component:chloroplast(GO:0009507)	-	4641.GSMUA_Achr11P22050_001|-279.6|COG0459|O|Prevents misfolding and promotes the refolding and proper assembly of unfolded polypeptides generated under stress conditions (By similarity)	PF00118.22|Cpn60_TCP1|3.7e-98|TCP-1/cpn60 chaperonin family	P08823|RUBA_WHEAT|-267.8|RuBisCO large subunit-binding protein subunit alpha, chloroplastic (Fragment) OS=Triticum aestivum PE=1 SV=1	XP_020276127.1|-290.3|ruBisCO large subunit-binding protein subunit alpha-like [Asparagus officinalis]
c190703_g1	cluster 2	1.53255	1.31403e-05	0.00297538	up	1.10461	1.61331e-05	0.00363332	up	-	-	-	-	cellular_component:chloroplast(GO:0009507);;cellular_component:chloroplast(GO:0009507);;cellular_component:plastid(GO:0009536)	-	4641.GSMUA_Achr10P14420_001|-140.9|COG0719|O|Fe-S assembly protein	PF01458.15|UPF0051|4.8e-61|Uncharacterized protein family (UPF0051)	Q9LQK7|AB7I_ARATH|-124.1|Protein ABCI7, chloroplastic OS=Arabidopsis thaliana GN=ABCI7 PE=1 SV=1	XP_020696861.1|-145.8|protein ABCI7, chloroplastic [Dendrobium catenatum]
c190977_g1	cluster 2	1.64577	0.000392861	0.00567361	up	1.2927	0.000301476	0.00632192	up	-	-	-	-	-	-	-	-	-	-
c191448_g1	cluster 2	1.31491	0.00262807	0.0141852	up	1.19411	0.00552218	0.0231251	up	-	-	-	-	cellular_component:plastid(GO:0009536);;cellular_component:chloroplast stroma(GO:0009570);;molecular_function:transferase activity(GO:0016740);;molecular_function:lyase activity(GO:0016829);;molecular_function:cysteine desulfurase activity(GO:0031071);;molecular_function:selenocysteine lyase activity(GO:0009000);;cellular_component:chloroplast(GO:0009507);;cellular_component:chloroplast(GO:000950…	pda:103716678|-166.5|K11717|sufS; cysteine desulfurase / selenocysteine lyase [EC:2.8.1.7 4.4.1.16]|ko00450|Selenocompound metabolism;;	4641.GSMUA_Achr11P19870_001|-164.7|COG0520|E|cysteine desulfurase	PF00266.17|Aminotran_5|3.9e-132|Aminotransferase class-V	Q93WX6|CNIF1_ARATH|-159.5|Cysteine desulfurase 1, chloroplastic OS=Arabidopsis thaliana GN=NFS2 PE=1 SV=1	ONK61761.1|-183.0|uncharacterized protein A4U43_C08F33320 [Asparagus officinalis]
c191573_g1	cluster 4	-	-	-	-	-1.40162	0.0104697	0.0345473	down	-	-	-	-	cellular_component:chloroplast(GO:0009507);;cellular_component:plastid(GO:0009536);;cellular_component:membrane(GO:0016020);;molecular_function:lyase activity(GO:0016829);;biological_process:oxylipin biosynthetic process(GO:0031408);;biological_process:oxylipin biosynthetic process(GO:0031408);;cellular_component:chloroplast membrane(GO:0031969);;molecular_function:metal ion binding(GO:0046872);;…	pda:103715824|-163.7|K01723|AOS; hydroperoxide dehydratase [EC:4.2.1.92]|ko00592|alpha-Linolenic acid metabolism;;	4641.GSMUA_Achr8P02880_001|-154.4|ENOG410ZAGU|Q|Allene oxide synthase	-	Q7Y0C8|C74A1_ORYSJ|-150.8|Allene oxide synthase 1, chloroplastic OS=Oryza sativa subsp. japonica GN=CYP74A1 PE=2 SV=1	XP_008801805.1|-162.9|PREDICTED: LOW QUALITY PROTEIN: allene oxide synthase 1, chloroplastic-like, partial [Phoenix dactylifera]
c192573_g1	cluster 1	2.36014	2.42388e-05	0.00319519	up	2.65649	8.13244e-06	0.00336618	up	-	-	-	-	cellular_component:membrane(GO:0016020);;cellular_component:integral component of membrane(GO:0016021);;cellular_component:chloroplast membrane(GO:0031969);;biological_process:multicellular organism development(GO:0007275);;cellular_component:chloroplast(GO:0009507);;cellular_component:plastid(GO:0009536)	-	4558.Sb06g022970.1|-141.2|ENOG410YE28|S|Domain of unknown function (DUF3411)	PF11891.6|RETICULATA-like|1.9e-66|Protein RETICULATA-related	Q9FGP9|RER1_ARATH|-139.4|Protein RETICULATA-RELATED 1, chloroplastic OS=Arabidopsis thaliana GN=RER1 PE=1 SV=1	XP_020260232.1|-153.9|protein RETICULATA-RELATED 1, chloroplastic-like [Asparagus officinalis]
c193174_g1	cluster 3	-1.05905	0.0168256	0.0462826	down	-2.52111	0.000622941	0.00794248	down	-2.43871	0.000303714	0.0218913	down	-	fve:101315306|-61.3|K13993|HSP20; HSP20 family protein|ko04141|Protein processing in endoplasmic reticulum;;	-	-	-	XP_020106864.1|-61.1|small heat shock protein, chloroplastic-like [Ananas comosus]
c193467_g1	cluster 2	2.49942	0.00020054	0.00447793	up	2.27908	0.000101118	0.00464886	up	-	-	-	-	cellular_component:plastid(GO:0009536);;molecular_function:phosphoglycerate transmembrane transporter activity(GO:0015120);;biological_process:phosphoglycerate transport(GO:0015713);;cellular_component:membrane(GO:0016020);;cellular_component:integral component of membrane(GO:0016021);;cellular_component:chloroplast membrane(GO:0031969);;biological_process:triose phosphate transmembrane transport…	-	29760.VIT_15s0024g01440.t01|-138.4|ENOG410XP1S|S|solute carrier family 35 member	PF03151.14|TPT|6.7e-108|Triose-phosphate Transporter family	Q9LF61|XPT_ARATH|-136.6|Xylulose 5-phosphate/phosphate translocator, chloroplastic OS=Arabidopsis thaliana GN=XPT PE=1 SV=1	XP_020263696.1|-151.2|xylulose 5-phosphate/phosphate translocator, chloroplastic [Asparagus officinalis]
c194204_g1	cluster 4	1.16954	5.32726e-05	0.00351314	up	-	-	-	-	-	-	-	-	cellular_component:plastid outer membrane(GO:0009527);;cellular_component:plastid(GO:0009536);;cellular_component:chloroplast outer membrane(GO:0009707);;molecular_function:porin activity(GO:0015288);;cellular_component:membrane(GO:0016020);;cellular_component:integral component of membrane(GO:0016021);;cellular_component:integral component of chloroplast outer membrane(GO:0031359);;molecular_fun…	-	4641.GSMUA_Achr3P19240_001|-113.8|ENOG410ZZSD|S|Outer envelope protein	-	O80565|OEP37_ARATH|-108.4|Outer envelope pore protein 37, chloroplastic OS=Arabidopsis thaliana GN=OEP37 PE=2 SV=2	XP_020246453.1|-123.9|outer envelope pore protein 37, chloroplastic isoform X2 [Asparagus officinalis]
c194396_g2	cluster 4	1.26263	0.000828718	0.00784595	up	-	-	-	-	-	-	-	-	molecular_function:peptidase activity(GO:0008233);;molecular_function:metallopeptidase activity(GO:0008237);;cellular_component:chloroplast(GO:0009507);;cellular_component:chloroplast thylakoid membrane(GO:0009535);;cellular_component:plastid(GO:0009536);;cellular_component:thylakoid(GO:0009579);;cellular_component:membrane(GO:0016020);;cellular_component:integral component of membrane(GO:0016021…	-	4113.PGSC0003DMT400044600|-10000.0|COG0465|O|Acts as a processive, ATP-dependent zinc metallopeptidase for both cytoplasmic and membrane proteins. Plays a role in the quality control of integral membrane proteins (By similarity)	PF01434.16|Peptidase_M41|4.4e-72|Peptidase family M41	Q655S1|FTSH2_ORYSJ|-10000.0|ATP-dependent zinc metalloprotease FTSH 2, chloroplastic OS=Oryza sativa subsp. japonica GN=FTSH2 PE=3 SV=1	XP_009385744.1|-10000.0|PREDICTED: ATP-dependent zinc metalloprotease FTSH 2, chloroplastic isoform X2 [Musa acuminata subsp. malaccensis]
c194421_g1	cluster 4	1.36054	0.00109472	0.00895889	up	1.06842	0.00762285	0.028284	up	-	-	-	-	cellular_component:plastid(GO:0009536);;biological_process:plant-type hypersensitive response(GO:0009626);;biological_process:response to ethylene(GO:0009723);;biological_process:response to salicylic acid(GO:0009751);;biological_process:ethylene-activated signaling pathway(GO:0009873);;cellular_component:membrane(GO:0016020);;cellular_component:membrane(GO:0016020);;cellular_component:integral c…	-	4641.GSMUA_Achr11P23010_001|-118.9|ENOG410XRQQ|S|GRAM domain containing	-	F4HVW5|VAD1_ARATH|-113.7|Protein VASCULAR ASSOCIATED DEATH 1, chloroplastic OS=Arabidopsis thaliana GN=VAD1 PE=1 SV=1	XP_020093529.1|-135.7|protein VASCULAR ASSOCIATED DEATH 1, chloroplastic [Ananas comosus]
c194649_g1	cluster 2	1.66166	0.00157806	0.0107757	up	1.26957	4.25106e-05	0.00399099	up	-	-	-	-	-	-	-	-	-	-
c194668_g1	cluster 1	1.02347	0.00122702	0.00948152	up	1.03168	0.000121496	0.0049531	up	-	-	-	-	biological_process:protein transport(GO:0015031);;cellular_component:membrane(GO:0016020);;cellular_component:chloroplast intermembrane space(GO:0031972);;biological_process:transport(GO:0006810);;cellular_component:chloroplast(GO:0009507);;cellular_component:plastid(GO:0009536)	-	4113.PGSC0003DMT400056320|-74.1|ENOG4111WM6|S|Tic22-like family	PF04278.10|Tic22|6.2e-84|Tic22-like family	F4J469|TI22L_ARATH|-67.1|Protein TIC 22-like, chloroplastic OS=Arabidopsis thaliana GN=TIC22L PE=3 SV=1	ONK56655.1|-88.4|uncharacterized protein A4U43_C10F11280 [Asparagus officinalis]
c194784_g1	cluster 2	1.19866	0.00105827	0.00880442	up	-	-	-	-	-	-	-	-	biological_process:translation(GO:0006412);;biological_process:translational elongation(GO:0006414);;cellular_component:chloroplast(GO:0009507);;cellular_component:chloroplast(GO:0009507);;cellular_component:plastid(GO:0009536);;molecular_function:nucleotide binding(GO:0000166);;molecular_function:translation elongation factor activity(GO:0003746);;molecular_function:GTP binding(GO:0005525)	-	29760.VIT_17s0000g09370.t01|-219.6|COG0050|J|This protein promotes the GTP-dependent binding of aminoacyl-tRNA to the A-site of ribosomes during protein biosynthesis (By similarity)	-	Q43364|EFTUB_NICSY|-218.1|Elongation factor TuB, chloroplastic OS=Nicotiana sylvestris GN=TUFB PE=2 SV=1	GAV65139.1|-218.0|GTP_EFTU domain-containing protein/Pkinase domain-containing protein/GTP_EFTU_D3 domain-containing protein/GTP_EFTU_D2 domain-containing protein, partial [Cephalotus follicularis]
c195845_g2	cluster 4	1.41748	0.000488539	0.00625184	up	1.17158	0.00163643	0.0117923	up	-	-	-	-	-	-	4081.Solyc04g050040.2.1|-112.5|ENOG4110BII|S|mitochondrial carrier protein	-	-	XP_020274876.1|-124.6|mitochondrial substrate carrier family protein C-like isoform X2 [Asparagus officinalis]
c196469_g2	cluster 1	1.09878	0.00171859	0.0112966	up	1.11946	0.00111235	0.0100187	up	1.10622	0.00494316	0.0478014	up	molecular_function:antiporter activity(GO:0015297);;cellular_component:membrane(GO:0016020);;cellular_component:integral component of membrane(GO:0016021);;cellular_component:chloroplast membrane(GO:0031969);;biological_process:transport(GO:0006810);;cellular_component:chloroplast(GO:0009507);;cellular_component:plastid(GO:0009536)	-	4641.GSMUA_Achr1P21140_001|-132.1|ENOG410XS20|S|solute carrier family 25 (pyrimidine nucleotide carrier	-	O22261|NDT1_ARATH|-118.5|Nicotinamide adenine dinucleotide transporter 1, chloroplastic OS=Arabidopsis thaliana GN=NDT1 PE=1 SV=2	XP_020269820.1|-149.0|nicotinamide adenine dinucleotide transporter 2, mitochondrial-like [Asparagus officinalis]
c196558_g2	cluster 1	2.37739	0.00194144	0.0120573	up	2.7225	0.000566965	0.007663	up	2.18281	0.00348103	0.0420409	up	-	-	39947.LOC_Os04g01230.1|-111.2|ENOG4111QJY|S|Phosphoglycerate mutase	-	Q9FGF0|PGML1_ARATH|-98.3|Phosphoglycerate mutase-like protein 1 OS=Arabidopsis thaliana GN=At5g64460 PE=2 SV=1	XP_020259723.1|-115.2|phosphoglycerate mutase-like protein 1 isoform X1 [Asparagus officinalis]
c196877_g1	cluster 1	1.3432	5.34692e-05	0.00351314	up	1.73275	8.81612e-05	0.00448497	up	1.58042	0.00106089	0.0281112	up	cellular_component:peroxisome(GO:0005777);;biological_process:lipid metabolic process(GO:0006629);;biological_process:fatty acid metabolic process(GO:0006631);;cellular_component:chloroplast(GO:0009507);;cellular_component:chloroplast(GO:0009507);;cellular_component:glyoxysome(GO:0009514);;cellular_component:glyoxysome(GO:0009514);;cellular_component:plastid(GO:0009536);;molecular_function:ligase…	mus:103987283|-10000.0|K01895|ACSS, acs; acetyl-CoA synthetase [EC:6.2.1.1]|ko01200|Carbon metabolism;;ko00620|Pyruvate metabolism;;ko00640|Propanoate metabolism;;ko00010|Glycolysis / Gluconeogenesis;;	4641.GSMUA_Achr6P08320_001|-10000.0|COG0365|I|Catalyzes the conversion of acetate into acetyl-CoA (AcCoA), an essential intermediate at the junction of anabolic and catabolic pathways. AcsA undergoes a two-step reaction. In the first half reaction, AcsA combines acetate with ATP to form acetyl-adenylate (AcAMP) intermediate. In the second half reaction, it can then transfer the acetyl group from …	PF00501.26|AMP-binding|1.2e-96|AMP-binding enzyme	B9DGD6|ACS_ARATH|-10000.0|Acetyl-coenzyme A synthetase, chloroplastic/glyoxysomal OS=Arabidopsis thaliana GN=ACS PE=1 SV=1	XP_009403818.1|-10000.0|PREDICTED: acetyl-coenzyme A synthetase, chloroplastic/glyoxysomal-like [Musa acuminata subsp. malaccensis]
c196881_g1	cluster 1	1.00799	0.00106038	0.00880451	up	1.32454	0.000469309	0.00714678	up	1.6554	0.000349828	0.0220538	up	molecular_function:oxidoreductase activity(GO:0016491);;molecular_function:peptide-methionine (R)-S-oxide reductase activity(GO:0033743);;molecular_function:metal ion binding(GO:0046872);;biological_process:oxidation-reduction process(GO:0055114);;biological_process:oxidation-reduction process(GO:0055114);;cellular_component:chloroplast(GO:0009507);;cellular_component:chloroplast(GO:0009507);;cel…	-	4081.Solyc10g047930.1.1|-64.2|COG0229|O|)-reductase	-	Q6AUK5|MSRB3_ORYSJ|-64.7|Peptide methionine sulfoxide reductase B3, chloroplastic OS=Oryza sativa subsp. japonica GN=MSRB3 PE=2 SV=1	XP_011088005.1|-63.0|peptide methionine sulfoxide reductase B5-like [Sesamum indicum]
c197029_g1	cluster 3	-2.09914	0.000113118	0.00399233	down	-2.95903	0.00149948	0.0113458	down	-3.31984	6.27929e-05	0.0177785	down	-	-	-	-	-	XP_020697236.1|-74.3|protein FAF-like, chloroplastic [Dendrobium catenatum]
c197103_g1	cluster 2	1.38528	0.000594748	0.00678728	up	-	-	-	-	-	-	-	-	cellular_component:chloroplast(GO:0009507);;cellular_component:chloroplast(GO:0009507);;cellular_component:plastid(GO:0009536);;biological_process:carotenoid biosynthetic process(GO:0016117);;molecular_function:transferase activity(GO:0016740);;molecular_function:geranylgeranyl-diphosphate geranylgeranyltransferase activity(GO:0016767);;molecular_function:catalytic activity(GO:0003824);;biologica…	egu:105058894|-185.3|K02291|crtB; 15-cis-phytoene/all-trans-phytoene synthase [EC:2.5.1.32 2.5.1.99]|ko00906|Carotenoid biosynthesis;;	4641.GSMUA_AchrUn_randomP09240_001|-176.3|COG1562|I|phytoene synthase	PF00494.17|SQS_PSY|1.7e-74|Squalene/phytoene synthase	P53797|PSY_NARPS|-198.7|Phytoene synthase, chloroplastic OS=Narcissus pseudonarcissus GN=PSY PE=2 SV=1	ONK64201.1|-202.0|uncharacterized protein A4U43_C07F23190 [Asparagus officinalis]
c197151_g1	cluster 3	-3.89288	0.000651541	0.00706616	down	-4.33515	0.000493325	0.00726306	down	-3.88739	0.00169253	0.0323214	down	-	-	-	-	-	XP_020242464.1|-52.9|translocator protein homolog [Asparagus officinalis]
c197220_g1	cluster 2	2.66995	2.94826e-05	0.00327353	up	2.41147	0.000109228	0.00478324	up	-	-	-	-	biological_process:carotenoid biosynthetic process(GO:0016117);;molecular_function:isomerase activity(GO:0016853);;cellular_component:chloroplast membrane(GO:0031969);;cellular_component:chloroplast(GO:0009507);;cellular_component:plastid(GO:0009536);;cellular_component:membrane(GO:0016020)	vvi:100263250|-265.9|K09835|crtISO, crtH; prolycopene isomerase [EC:5.2.1.13]|ko00906|Carotenoid biosynthesis;;	4641.GSMUA_Achr8P26670_001|-266.6|COG1233|Q|phytoene	-	Q2VEX9|CRTSO_DAUCA|-265.5|Prolycopene isomerase, chloroplastic OS=Daucus carota GN=CRTISO PE=2 SV=1	XP_020268387.1|-282.5|prolycopene isomerase, chloroplastic [Asparagus officinalis]
c197267_g1	cluster 1	1.69116	0.00016951	0.00426375	up	1.50885	9.78108e-05	0.00459546	up	1.25961	0.00163567	0.0320668	up	cellular_component:mitochondrion(GO:0005739);;cellular_component:mitochondrial intermembrane space(GO:0005758);;biological_process:nucleotide metabolic process(GO:0009117);;cellular_component:chloroplast(GO:0009507);;cellular_component:plastid(GO:0009536);;cellular_component:chloroplast thylakoid lumen(GO:0009543);;cellular_component:thylakoid(GO:0009579);;molecular_function:kinase activity(GO:00…	pda:103709541|-99.7|K00940|ndk, NME; nucleoside-diphosphate kinase [EC:2.7.4.6]|ko00230|Purine metabolism;;ko00240|Pyrimidine metabolism;;	4641.GSMUA_Achr1P11560_001|-97.3|COG0105|F|Major role in the synthesis of nucleoside triphosphates other than ATP. The ATP gamma phosphate is transferred to the NDP beta phosphate via a ping-pong mechanism, using a phosphorylated active-site intermediate (By similarity)	-	O49203|NDK3_ARATH|-93.0|Nucleoside diphosphate kinase III, chloroplastic/mitochondrial OS=Arabidopsis thaliana GN=NDPK3 PE=1 SV=1	XP_020266612.1|-106.4|nucleoside diphosphate kinase III, chloroplastic/mitochondrial [Asparagus officinalis]
c197307_g2	cluster 2	1.43288	3.6084e-05	0.00332804	up	-	-	-	-	-	-	-	-	biological_process:cellular response to DNA damage stimulus(GO:0006974);;cellular_component:nucleus(GO:0005634);;cellular_component:nucleus(GO:0005634);;biological_process:DNA repair(GO:0006281)	egu:105038513|-310.4|K08734|MLH1; DNA mismatch repair protein MLH1|ko03430|Mismatch repair;;	15368.BRADI2G61370.1|-294.0|COG0323|L|This protein is involved in the repair of mismatches in DNA. It is required for dam-dependent methyl-directed DNA mismatch repair. May act as a molecular matchmaker , a protein that promotes the formation of a stable complex between two or more DNA-binding proteins in an ATP-dependent manner without itself being part of a final effector complex (By similarity)	PF16413.3|Mlh1_C|3.4e-83|DNA mismatch repair protein Mlh1 C-terminus	Q9ZRV4|MLH1_ARATH|-280.9|DNA mismatch repair protein MLH1 OS=Arabidopsis thaliana GN=MLH1 PE=2 SV=1	XP_020245799.1|-10000.0|LOW QUALITY PROTEIN: DNA mismatch repair protein MLH1 [Asparagus officinalis]
c197487_g1	cluster 4	1.11584	0.000177399	0.00434898	up	-	-	-	-	-	-	-	-	-	-	4513.MLOC_74226.3|-115.4|ENOG410YDXB|S|Protein of unknown function (DUF760)	-	-	XP_008798412.1|-133.8|PREDICTED: UV-B-induced protein At3g17800, chloroplastic-like [Phoenix dactylifera]
c197911_g1	cluster 1	1.02078	0.000119838	0.00406677	up	1.02973	0.000197785	0.00553752	up	-	-	-	-	molecular_function:metal ion binding(GO:0046872);;molecular_function:iron-sulfur cluster binding(GO:0051536);;molecular_function:2 iron, 2 sulfur cluster binding(GO:0051537);;cellular_component:chloroplast(GO:0009507);;cellular_component:chloroplast(GO:0009507);;cellular_component:plastid(GO:0009536)	-	4641.GSMUA_Achr5P14210_001|-97.3|COG0278|O|Glutaredoxin	-	Q2QX01|GRS12_ORYSJ|-89.3|Monothiol glutaredoxin-S12, chloroplastic OS=Oryza sativa subsp. japonica GN=GRXS12 PE=2 SV=1	XP_020252677.1|-101.2|monothiol glutaredoxin-S12, chloroplastic isoform X2 [Asparagus officinalis]
c198069_g1	cluster 2	1.70826	0.00032331	0.00525063	up	1.52046	0.00122327	0.0104559	up	-	-	-	-	biological_process:purine nucleotide biosynthetic process(GO:0006164);;cellular_component:chloroplast(GO:0009507);;cellular_component:chloroplast(GO:0009507);;cellular_component:plastid(GO:0009536);;molecular_function:ligase activity(GO:0016874);;biological_process:'de novo' AMP biosynthetic process(GO:0044208);;molecular_function:metal ion binding(GO:0046872);;molecular_function:nucleotide bindi…	sita:101759604|-218.6|K01939|purA, ADSS; adenylosuccinate synthase [EC:6.3.4.4]|ko00230|Purine metabolism;;ko00250|Alanine, aspartate and glutamate metabolism;;	4555.Si035380m|-219.8|COG0104|F|Plays an important role in the de novo pathway of purine nucleotide biosynthesis	PF00709.19|Adenylsucc_synt|1.7e-173|Adenylosuccinate synthetase	A2XD35|PURA_ORYSI|-221.3|Adenylosuccinate synthetase, chloroplastic OS=Oryza sativa subsp. indica GN=PURA PE=3 SV=2	XP_020246021.1|-225.8|adenylosuccinate synthetase 2, chloroplastic-like [Asparagus officinalis]
c198119_g3	cluster 4	1.5567	0.00870859	0.029527	up	1.15904	0.0111198	0.036032	up	-	-	-	-	molecular_function:uridine kinase activity(GO:0004849);;molecular_function:GTP binding(GO:0005525);;biological_process:metabolic process(GO:0008152);;biological_process:metabolic process(GO:0008152);;cellular_component:chloroplast(GO:0009507);;cellular_component:chloroplast(GO:0009507);;cellular_component:plastid(GO:0009536);;molecular_function:kinase activity(GO:0016301);;biological_process:phos…	pda:103710575|-53.8|K00876|udk, UCK; uridine kinase [EC:2.7.1.48]|ko00240|Pyrimidine metabolism;;	4641.GSMUA_Achr5P25140_001|-54.2|COG0035|F|Catalyzes the conversion of uracil and 5-phospho-alpha- D-ribose 1-diphosphate (PRPP) to UMP and diphosphate (By similarity)	-	Q9LK34|UKL2_ARATH|-53.1|Uridine kinase-like protein 2, chloroplastic OS=Arabidopsis thaliana GN=UKL2 PE=2 SV=1	XP_008794574.1|-52.9|PREDICTED: uridine kinase-like protein 1, chloroplastic [Phoenix dactylifera]
c198135_g2	cluster 3	-	-	-	-	-3.45964	0.0170636	0.0477926	down	-	-	-	-	-	-	-	-	-	-
c198302_g1	cluster 2	2.74748	0.000407905	0.00577452	up	2.10992	0.0011061	0.00999251	up	-	-	-	-	cellular_component:chloroplast(GO:0009507);;cellular_component:plastid(GO:0009536);;cellular_component:chloroplast stroma(GO:0009570)	-	15368.BRADI1G33700.1|-73.1|COG0694|O|metallo-sulfur cluster assembly	-	Q84RQ7|NIFU3_ARATH|-67.8|NifU-like protein 3, chloroplastic OS=Arabidopsis thaliana GN=NIFU3 PE=2 SV=1	XP_020264655.1|-81.1|nifU-like protein 3, chloroplastic isoform X1 [Asparagus officinalis]
c198919_g1	cluster 4	1.84191	3.43602e-05	0.00332543	up	1.3773	9.12699e-05	0.00456079	up	-	-	-	-	cellular_component:chloroplast stroma(GO:0009570);;cellular_component:chloroplast outer membrane(GO:0009707);;cellular_component:membrane(GO:0016020);;cellular_component:integral component of membrane(GO:0016021);;cellular_component:chloroplast(GO:0009507);;cellular_component:plastid outer membrane(GO:0009527);;cellular_component:plastid(GO:0009536)	-	4641.GSMUA_Achr9P12190_001|-112.7|ENOG4111FQD|S|May be involved in photosynthetic membrane biogenesis (By similarity)	PF11264.6|ThylakoidFormat|2.3e-74|Thylakoid formation protein	Q84PB7|THF1_ORYSJ|-107.1|Protein THYLAKOID FORMATION1, chloroplastic OS=Oryza sativa subsp. japonica GN=THF1 PE=2 SV=1	XP_020256439.1|-120.8|protein THYLAKOID FORMATION1, chloroplastic [Asparagus officinalis]
c198928_g1	cluster 2	1.40806	0.000153431	0.00419048	up	1.33477	0.000385238	0.00669083	up	-	-	-	-	biological_process:pentose-phosphate shunt(GO:0006098);;cellular_component:chloroplast(GO:0009507);;cellular_component:chloroplast thylakoid membrane(GO:0009535);;cellular_component:chloroplast thylakoid membrane(GO:0009535);;cellular_component:plastid(GO:0009536);;cellular_component:thylakoid(GO:0009579);;cellular_component:membrane(GO:0016020);;molecular_function:isomerase activity(GO:0016853);…	spen:107014260|-124.4|K01783|rpe, RPE; ribulose-phosphate 3-epimerase [EC:5.1.3.1]|ko00710|Carbon fixation in photosynthetic organisms;;ko01200|Carbon metabolism;;ko00040|Pentose and glucuronate interconversions;;ko00030|Pentose phosphate pathway;;ko01230|Biosynthesis of amino acids;;	4081.Solyc03g115820.2.1|-124.9|COG0036|G|ribulose-phosphate 3-epimerase activity	PF00834.17|Ribul_P_3_epim|2.6e-89|Ribulose-phosphate 3 epimerase family	Q43843|RPE_SOLTU|-125.8|Ribulose-phosphate 3-epimerase, chloroplastic (Fragment) OS=Solanum tuberosum PE=1 SV=1	XP_020257362.1|-125.9|ribulose-phosphate 3-epimerase, chloroplastic-like [Asparagus officinalis]
c199036_g1	cluster 1	1.97171	6.21402e-05	0.00355885	up	1.96965	0.00052456	0.00744803	up	1.77336	0.000562167	0.0242799	up	cellular_component:plastid(GO:0009536);;molecular_function:antioxidant activity(GO:0016209);;molecular_function:oxidoreductase activity(GO:0016491);;molecular_function:metal ion binding(GO:0046872);;biological_process:oxidation-reduction process(GO:0055114);;molecular_function:superoxide dismutase activity(GO:0004784);;cellular_component:chloroplast(GO:0009507);;cellular_component:chloroplast(GO:…	sind:105169947|-80.1|K04565|SOD1; superoxide dismutase, Cu-Zn family [EC:1.15.1.1]|ko04146|Peroxisome;;	4558.Sb07g023950.1|-79.2|COG2032|P|Destroys radicals which are normally produced within the cells and which are toxic to biological systems (By similarity)	-	O04997|SODCP_SOLCS|-81.9|Superoxide dismutase [Cu-Zn], chloroplastic OS=Solidago canadensis var. scabra GN=SODCP PE=2 SV=1	XP_020260009.1|-82.2|superoxide dismutase [Cu-Zn], chloroplastic [Asparagus officinalis]
c199322_g1	cluster 1	1.35558	0.00279475	0.0146929	up	1.47032	0.00315207	0.0167405	up	-	-	-	-	cellular_component:chloroplast(GO:0009507);;cellular_component:chloroplast(GO:0009507);;cellular_component:plastid(GO:0009536);;molecular_function:nucleotide binding(GO:0000166);;molecular_function:ATP binding(GO:0005524);;biological_process:transport(GO:0006810)	-	59689.fgenesh2_kg.3__1102__AT3G10670.1|-107.5|COG0396|O|feS assembly ATPase SufC	-	Q9CAF5|AB6I_ARATH|-108.6|ABC transporter I family member 6, chloroplastic OS=Arabidopsis thaliana GN=ABCI6 PE=1 SV=1	XP_020267686.1|-115.2|ABC transporter I family member 6, chloroplastic-like [Asparagus officinalis]
c199342_g1	cluster 1	-	-	-	-	1.26212	0.000209377	0.00562916	up	1.04599	0.00148753	0.0310219	up	biological_process:fatty acid biosynthetic process(GO:0006633);;biological_process:fatty acid biosynthetic process(GO:0006633);;cellular_component:chloroplast(GO:0009507);;cellular_component:chloroplast(GO:0009507);;cellular_component:plastid(GO:0009536);;molecular_function:oxidoreductase activity(GO:0016491);;biological_process:oxidation-reduction process(GO:0055114);;molecular_function:enoyl-[a…	pda:103713921|-162.6|K00208|fabI; enoyl-[acyl-carrier protein] reductase I [EC:1.3.1.9 1.3.1.10]|ko00061|Fatty acid biosynthesis;;ko01212|Fatty acid metabolism;;ko00780|Biotin metabolism;;	39946.BGIOSGA028458-PA|-151.9|COG0623|I|Enoyl- acyl-carrier-protein reductase NADH	-	Q6Z0I4|FABI1_ORYSJ|-153.2|Enoyl-[acyl-carrier-protein] reductase [NADH] 1, chloroplastic OS=Oryza sativa subsp. japonica GN=Os08g0327400 PE=2 SV=1	XP_020258897.1|-169.2|enoyl-[acyl-carrier-protein] reductase [NADH] 1, chloroplastic-like [Asparagus officinalis]
c199365_g2	cluster 4	1.03498	0.00753579	0.0269706	up	-	-	-	-	-	-	-	-	biological_process:fatty acid biosynthetic process(GO:0006633);;biological_process:fatty acid biosynthetic process(GO:0006633);;cellular_component:chloroplast(GO:0009507);;cellular_component:chloroplast(GO:0009507);;cellular_component:plastid(GO:0009536);;molecular_function:oxidoreductase activity(GO:0016491);;biological_process:oxidation-reduction process(GO:0055114);;molecular_function:enoyl-[a…	sita:101763044|-139.4|K00208|fabI; enoyl-[acyl-carrier protein] reductase I [EC:1.3.1.9 1.3.1.10]|ko00061|Fatty acid biosynthesis;;ko01212|Fatty acid metabolism;;ko00780|Biotin metabolism;;	4555.Si030207m|-140.7|COG0623|I|Enoyl- acyl-carrier-protein reductase NADH	-	Q6H5J0|FABI2_ORYSJ|-141.4|Enoyl-[acyl-carrier-protein] reductase [NADH] 2, chloroplastic OS=Oryza sativa subsp. japonica GN=Os09g0277800 PE=2 SV=1	XP_020258897.1|-143.6|enoyl-[acyl-carrier-protein] reductase [NADH] 1, chloroplastic-like [Asparagus officinalis]
c199516_g1	cluster 1	2.55927	0.000450213	0.00607365	up	2.05368	0.000999534	0.00955699	up	1.66759	0.00338903	0.041479	up	cellular_component:chloroplast(GO:0009507);;cellular_component:plastid(GO:0009536);;molecular_function:oxidoreductase activity(GO:0016491);;biological_process:oxidation-reduction process(GO:0055114);;molecular_function:pyruvate dehydrogenase (acetyl-transferring) activity(GO:0004739);;biological_process:glycolytic process(GO:0006096);;cellular_component:chloroplast(GO:0009507)	mus:103983525|-185.9|K00162|PDHB, pdhB; pyruvate dehydrogenase E1 component beta subunit [EC:1.2.4.1]|ko01200|Carbon metabolism;;ko00620|Pyruvate metabolism;;ko00020|Citrate cycle (TCA cycle);;ko00010|Glycolysis / Gluconeogenesis;;	3847.GLYMA05G27260.1|-179.3|COG0022|C|Dehydrogenase, E1 component	-	O64688|ODPB3_ARATH|-174.5|Pyruvate dehydrogenase E1 component subunit beta-3, chloroplastic OS=Arabidopsis thaliana GN=E1-BETA-2 PE=2 SV=1	XP_020277201.1|-192.6|pyruvate dehydrogenase E1 component subunit beta-like [Asparagus officinalis]
c199557_g1	cluster 4	-	-	-	-	-	-	-	-	-	-	-	-	molecular_function:serine O-acetyltransferase activity(GO:0009001);;cellular_component:chloroplast(GO:0009507);;cellular_component:chloroplast(GO:0009507);;cellular_component:plastid(GO:0009536);;molecular_function:transferase activity(GO:0016740);;molecular_function:transferase activity, transferring acyl groups(GO:0016746);;biological_process:cysteine biosynthetic process(GO:0019344);;cellular_…	egu:105033933|-81.2|K00640|cysE; serine O-acetyltransferase [EC:2.3.1.30]|ko01200|Carbon metabolism;;ko01230|Biosynthesis of amino acids;;ko00270|Cysteine and methionine metabolism;;ko00920|Sulfur metabolism;;	4513.MLOC_59914.1|-76.3|COG1045|E|serine acetyltransferase	-	Q42588|SAT1_ARATH|-75.0|Serine acetyltransferase 1, chloroplastic OS=Arabidopsis thaliana GN=SAT1 PE=1 SV=2	XP_010907220.1|-80.4|PREDICTED: probable serine acetyltransferase 4 [Elaeis guineensis]
c199584_g1	cluster 1	1.07298	0.00325137	0.0160072	up	1.31589	0.00530235	0.0226661	up	1.25768	0.00314561	0.0403257	up	biological_process:transport(GO:0006810);;cellular_component:chloroplast(GO:0009507);;cellular_component:plastid inner membrane(GO:0009528);;cellular_component:plastid(GO:0009536);;cellular_component:chloroplast inner membrane(GO:0009706);;biological_process:protein transport(GO:0015031);;cellular_component:membrane(GO:0016020);;cellular_component:integral component of membrane(GO:0016021);;molec…	-	29760.VIT_18s0001g13050.t01|-102.2|ENOG4111GFU|S|Tic20-like protein	PF16166.3|TIC20|7.8e-74|Chloroplast import apparatus Tic20-like	Q8GZ79|TI201_ARATH|-96.4|Protein TIC 20-I, chloroplastic OS=Arabidopsis thaliana GN=TIC20-I PE=1 SV=1	XP_020242131.1|-115.1|protein TIC 20-I, chloroplastic-like [Asparagus officinalis]
c199759_g1	cluster 1	1.82361	0.000479031	0.00620726	up	2.02941	0.000624806	0.00795224	up	1.63163	0.00187783	0.0334778	up	cellular_component:plastid(GO:0009536);;cellular_component:chloroplast stroma(GO:0009570);;molecular_function:transferase activity(GO:0016740);;molecular_function:transferase activity, transferring acyl groups(GO:0016746);;molecular_function:dihydrolipoyllysine-residue acetyltransferase activity(GO:0004742);;biological_process:glycolytic process(GO:0006096);;cellular_component:chloroplast(GO:0009…	pda:103715330|-185.7|K00627|DLAT, aceF, pdhC; pyruvate dehydrogenase E2 component (dihydrolipoamide acetyltransferase) [EC:2.3.1.12]|ko00020|Citrate cycle (TCA cycle);;ko01200|Carbon metabolism;;ko00620|Pyruvate metabolism;;ko00010|Glycolysis / Gluconeogenesis;;	29760.VIT_01s0011g03380.t01|-180.7|COG0508|C|Dehydrogenase	PF00198.21|2-oxoacid_dh|7.1e-66|2-oxoacid dehydrogenases acyltransferase (catalytic domain)	Q9SQI8|ODP24_ARATH|-175.4|Dihydrolipoyllysine-residue acetyltransferase component 4 of pyruvate dehydrogenase complex, chloroplastic OS=Arabidopsis thaliana GN=LTA2 PE=2 SV=1	XP_008801137.1|-184.9|PREDICTED: dihydrolipoyllysine-residue acetyltransferase component 4 of pyruvate dehydrogenase complex, chloroplastic [Phoenix dactylifera]
c199835_g1	cluster 1	1.04172	0.00144061	0.0102262	up	1.11808	8.58673e-05	0.00443112	up	-	-	-	-	molecular_function:ATP binding(GO:0005524);;cellular_component:mitochondrion(GO:0005739);;cellular_component:mitochondrion(GO:0005739);;biological_process:translation(GO:0006412);;cellular_component:chloroplast(GO:0009507);;cellular_component:chloroplast(GO:0009507);;cellular_component:plastid(GO:0009536);;molecular_function:ligase activity(GO:0016874);;molecular_function:nucleotide binding(GO:00…	egu:105055562|-210.8|K01892|HARS, hisS; histidyl-tRNA synthetase [EC:6.1.1.21]|ko00970|Aminoacyl-tRNA biosynthesis;;	4577.GRMZM2G158228_P01|-208.5|COG0124|J|Histidyl-trna synthetase	-	O82413|SYHM_ARATH|-166.5|Histidine--tRNA ligase, chloroplastic/mitochondrial OS=Arabidopsis thaliana GN=At3g46100 PE=2 SV=1	XP_020274945.1|-220.1|histidine--tRNA ligase, chloroplastic/mitochondrial [Asparagus officinalis]
c199838_g2	cluster 1	1.84872	0.0017402	0.0113647	up	1.75571	0.00257096	0.0149625	up	-	-	-	-	cellular_component:chloroplast(GO:0009507);;cellular_component:chloroplast(GO:0009507);;cellular_component:plastid(GO:0009536);;molecular_function:kinase activity(GO:0016301);;biological_process:phosphorylation(GO:0016310);;molecular_function:transferase activity(GO:0016740);;molecular_function:nucleotide binding(GO:0000166);;molecular_function:adenylate kinase activity(GO:0004017);;molecular_fun…	egu:105037896|-104.9|K00939|adk, AK; adenylate kinase [EC:2.7.4.3]|ko00230|Purine metabolism;;	4641.GSMUA_Achr7P23490_001|-96.7|COG0563|F|Catalyzes the reversible transfer of the terminal phosphate group between ATP and AMP. Plays an important role in cellular energy homeostasis and in adenine nucleotide metabolism (By similarity)	-	Q6ZC69|KAD2_ORYSJ|-93.3|Probable adenylate kinase 2, chloroplastic OS=Oryza sativa subsp. japonica GN=Os08g0109300 PE=2 SV=1	XP_020248209.1|-106.4|adenylate kinase, chloroplastic-like isoform X5 [Asparagus officinalis]
c200172_g1	cluster 2	2.56182	0.00405856	0.0182448	up	1.93567	0.00875892	0.03073	up	-	-	-	-	-	-	-	-	-	-
c200303_g1	cluster 1	-	-	-	-	1.21666	0.00702231	0.0267931	up	-	-	-	-	cellular_component:plastid(GO:0009536);;cellular_component:intracellular ribonucleoprotein complex(GO:0030529);;cellular_component:signal recognition particle, endoplasmic reticulum targeting(GO:0005786);;cellular_component:chloroplast(GO:0009507);;cellular_component:chloroplast(GO:0009507)	-	4538.ORGLA03G0023300.1|-121.6|COG0666|S|Ankyrin Repeat	-	Q8LSQ2|SR43C_ORYSJ|-122.6|Probable signal recognition particle 43 kDa protein, chloroplastic OS=Oryza sativa subsp. japonica GN=Os03g0131900 PE=2 SV=1	XP_020084415.1|-121.2|probable signal recognition particle 43 kDa protein, chloroplastic [Ananas comosus]
c200421_g1	cluster 3	-1.51635	0.000376836	0.00559452	down	-1.2085	7.946e-05	0.00435085	down	-	-	-	-	cellular_component:chloroplast stroma(GO:0009570);;molecular_function:lyase activity(GO:0016829);;molecular_function:metal ion binding(GO:0046872);;molecular_function:lactoylglutathione lyase activity(GO:0004462);;cellular_component:chloroplast(GO:0009507);;cellular_component:plastid(GO:0009536)	atr:18426718|-155.3|K01759|GLO1, gloA; lactoylglutathione lyase [EC:4.4.1.5]|ko00620|Pyruvate metabolism;;	29760.VIT_11s0016g03440.t01|-152.2|COG0346|E|glyoxalase bleomycin resistance protein dioxygenase	-	Q8W593|LGUC_ARATH|-142.2|Probable lactoylglutathione lyase, chloroplastic OS=Arabidopsis thaliana GN=At1g67280 PE=1 SV=1	BAK22530.1|-194.8|glyoxalase I homolog 2 [Allium cepa]
c200531_g1	cluster 1	-	-	-	-	1.10875	0.00325467	0.0169896	up	1.22294	0.00168688	0.0322922	up	cellular_component:plastid(GO:0009536);;cellular_component:plastid(GO:0009536)	-	4641.GSMUA_Achr4P18340_001|-187.2|ENOG410XU74|S|Chromosome 16 open reading frame 58	PF04884.12|DUF647|2.8e-67|Vitamin B6 photo-protection and homoeostasis	Q9SJX7|RUS2_ARATH|-163.0|Protein root UVB sensitive 2, chloroplastic OS=Arabidopsis thaliana GN=RUS2 PE=1 SV=2	XP_020247524.1|-192.9|protein root UVB sensitive 2, chloroplastic [Asparagus officinalis]
c200653_g1	cluster 2	1.48062	0.00365479	0.0171354	up	1.30359	0.00619352	0.0247555	up	-	-	-	-	-	sbi:SORBI_01g002180|-50.4|K02639|petF; ferredoxin|ko00195|Photosynthesis;;	4558.Sb01g002180.1|-51.7|COG0633|C|Ferredoxin	-	-	XP_002466146.1|-49.6|ferredoxin-3, chloroplastic [Sorghum bicolor]
c200666_g1	cluster 1	1.04277	0.0025095	0.0137996	up	-	-	-	-	-	-	-	-	-	-	4641.GSMUA_Achr8P17700_001|-55.0|ENOG410YI2T|S|NA	-	-	XP_020261228.1|-64.0|DNA repair RAD52-like protein 2, chloroplastic [Asparagus officinalis]
c201335_g1	cluster 3	-1.0432	0.00145934	0.0103031	down	-	-	-	-	-	-	-	-	-	-	-	-	-	-
c201346_g1	cluster 4	1.65222	0.000769965	0.00759061	up	1.48149	0.00359297	0.0180057	up	-	-	-	-	biological_process:branched-chain amino acid biosynthetic process(GO:0009082);;biological_process:isoleucine biosynthetic process(GO:0009097);;biological_process:leucine biosynthetic process(GO:0009098);;biological_process:valine biosynthetic process(GO:0009099);;cellular_component:chloroplast(GO:0009507);;cellular_component:chloroplast(GO:0009507);;cellular_component:plastid(GO:0009536);;molecul…	egu:105055889|-161.5|K00826|E2.6.1.42, ilvE; branched-chain amino acid aminotransferase [EC:2.6.1.42]|ko00290|Valine, leucine and isoleucine biosynthesis;;ko00770|Pantothenate and CoA biosynthesis;;ko00280|Valine, leucine and isoleucine degradation;;ko01210|2-Oxocarboxylic acid metabolism;;ko01230|Biosynthesis of amino acids;;ko00270|Cysteine and methionine metabolism;;	4641.GSMUA_Achr8P05090_001|-161.6|COG0115|E|brancheD-chain amino acid aminotransferase	-	Q9M401|BCAT3_ARATH|-153.5|Branched-chain-amino-acid aminotransferase 3, chloroplastic OS=Arabidopsis thaliana GN=BCAT3 PE=1 SV=1	XP_020244674.1|-167.3|branched-chain-amino-acid aminotransferase 5, chloroplastic-like [Asparagus officinalis]
c201951_g1	cluster 2	2.03255	0.000205552	0.00451033	up	1.47586	0.000411447	0.00684758	up	-	-	-	-	cellular_component:chloroplast(GO:0009507);;cellular_component:plastid(GO:0009536);;molecular_function:rRNA binding(GO:0019843);;cellular_component:intracellular ribonucleoprotein complex(GO:0030529);;molecular_function:RNA binding(GO:0003723);;cellular_component:ribosome(GO:0005840);;cellular_component:chloroplast(GO:0009507)	egu:105060039|-80.2|K02996|RP-S9, MRPS9, rpsI; small subunit ribosomal protein S9|ko03010|Ribosome;;	3711.Bra015878.1-P|-76.0|COG0103|J|30S ribosomal protein S9	-	P82278|RR9_SPIOL|-70.9|30S ribosomal protein S9, chloroplastic OS=Spinacia oleracea GN=PRPS9 PE=1 SV=2	XP_010941922.1|-79.5|PREDICTED: 30S ribosomal protein S9, chloroplastic [Elaeis guineensis]
c202447_g1	cluster 1	2.94352	0.000223766	0.00461696	up	2.20891	0.000525263	0.00744803	up	2.51845	0.0034762	0.0420409	up	cellular_component:chloroplast(GO:0009507);;cellular_component:plastid(GO:0009536);;molecular_function:rRNA binding(GO:0019843);;cellular_component:intracellular ribonucleoprotein complex(GO:0030529);;molecular_function:RNA binding(GO:0003723);;cellular_component:ribosome(GO:0005840);;cellular_component:chloroplast(GO:0009507)	egu:105050488|-77.4|K13126|PABPC; polyadenylate-binding protein|ko03018|RNA degradation;;ko03015|mRNA surveillance pathway;;ko03013|RNA transport;;	3847.GLYMA15G42610.1|-70.9|COG0724|S|Rna-binding protein	-	P82277|RRP2_SPIOL|-68.0|30S ribosomal protein 2, chloroplastic OS=Spinacia oleracea GN=PSRP2 PE=1 SV=1	XP_020271351.1|-80.6|30S ribosomal protein 2, chloroplastic-like isoform X1 [Asparagus officinalis]
c202455_g1	cluster 4	-	-	-	-	-	-	-	-	-	-	-	-	-	-	-	-	-	XP_020275343.1|-86.8|protein CHLOROPLAST IMPORT APPARATUS 2-like [Asparagus officinalis]
c202648_g1	cluster 6	-1.49211	0.000548633	0.00656213	down	-	-	-	-	-	-	-	-	-	-	-	-	-	ONK81492.1|-51.7|uncharacterized protein A4U43_C01F29700 [Asparagus officinalis]
c202891_g2	cluster 1	2.8475	0.00886511	0.0299022	up	1.67437	0.000386448	0.00670546	up	-	-	-	-	-	-	-	-	-	-
c202992_g1	cluster 3	-1.67929	0.00796155	0.0279208	down	-4.0754	8.53826e-05	0.00441883	down	-3.46308	0.00483507	0.0474117	down	-	-	-	-	-	-
c203285_g1	cluster 2	1.74603	0.00423983	0.0187443	up	1.86492	0.00508581	0.022085	up	-	-	-	-	cellular_component:plastid(GO:0009536);;cellular_component:chloroplast thylakoid lumen(GO:0009543);;cellular_component:thylakoid(GO:0009579);;molecular_function:isomerase activity(GO:0016853);;molecular_function:peptidyl-prolyl cis-trans isomerase activity(GO:0003755);;molecular_function:peptidyl-prolyl cis-trans isomerase activity(GO:0003755);;cellular_component:chloroplast(GO:0009507)	-	3694.POPTR_0014s04510.1|-87.5|COG0545|O|Peptidyl-prolyl cis-trans isomerase	-	Q0WRJ7|FK202_ARATH|-80.4|Peptidyl-prolyl cis-trans isomerase FKBP20-2, chloroplastic OS=Arabidopsis thaliana GN=FKBP20-2 PE=1 SV=1	XP_020263348.1|-94.7|peptidyl-prolyl cis-trans isomerase FKBP20-2, chloroplastic [Asparagus officinalis]
c203601_g1	cluster 5	-	-	-	-	1.10147	0.0129614	0.0397627	up	-	-	-	-	cellular_component:chloroplast(GO:0009507);;cellular_component:plastid(GO:0009536);;molecular_function:nucleotide binding(GO:0000166);;molecular_function:ATP binding(GO:0005524);;cellular_component:chloroplast(GO:0009507)	egu:105051980|-140.3|K01934|MTHFS; 5-formyltetrahydrofolate cyclo-ligase [EC:6.3.3.2]|ko00670|One carbon pool by folate;;	29760.VIT_18s0072g00300.t01|-137.3|COG0212|H|5-formyltetrahydrofolate cyclo-ligase	-	Q9SRE0|5FCLL_ARATH|-125.6|5-formyltetrahydrofolate cyclo-ligase-like protein COG0212 OS=Arabidopsis thaliana GN=COG0212 PE=2 SV=1	XP_020246287.1|-140.2|5-formyltetrahydrofolate cyclo-ligase-like protein COG0212 [Asparagus officinalis]
c203611_g1	cluster 2	1.81068	0.000763596	0.00756313	up	1.50925	0.00283315	0.0158002	up	-	-	-	-	cellular_component:plastid inner membrane(GO:0009528);;cellular_component:plastid(GO:0009536);;cellular_component:chloroplast inner membrane(GO:0009706);;cellular_component:membrane(GO:0016020);;cellular_component:integral component of membrane(GO:0016021);;biological_process:transport(GO:0006810);;biological_process:lipid transport(GO:0006869);;cellular_component:chloroplast(GO:0009507)	-	4533.OB01G54810.1|-141.5|COG1463|Q|Mammalian cell entry related domain protein	-	Q9LTR2|TGD2_ARATH|-131.6|Protein TRIGALACTOSYLDIACYLGLYCEROL 2, chloroplastic OS=Arabidopsis thaliana GN=TGD2 PE=1 SV=1	XP_020242441.1|-151.0|protein TRIGALACTOSYLDIACYLGLYCEROL 2, chloroplastic [Asparagus officinalis]
c203633_g1	cluster 2	1.40013	0.000700121	0.00727737	up	1.4261	0.000399985	0.00679235	up	-	-	-	-	cellular_component:chloroplast(GO:0009507);;cellular_component:plastid(GO:0009536);;molecular_function:transferase activity(GO:0016740);;molecular_function:lyase activity(GO:0016829);;biological_process:tetrahydrofolate biosynthetic process(GO:0046654);;molecular_function:D-alanine:2-oxoglutarate aminotransferase activity(GO:0047810);;molecular_function:transaminase activity(GO:0008483);;molecula…	egu:105040943|-142.5|K18482|ADCL; 4-amino-4-deoxychorismate lyase [EC:4.1.3.38]|ko00790|Folate biosynthesis;;	4641.GSMUA_Achr10P00080_001|-136.4|COG0115|E|brancheD-chain amino acid aminotransferase	-	Q8L493|DAAA_ARATH|-105.7|D-amino-acid transaminase, chloroplastic OS=Arabidopsis thaliana GN=DAAT PE=1 SV=1	ONK55626.1|-149.6|uncharacterized protein A4U43_UnF790 [Asparagus officinalis]
c203891_g2	cluster 4	1.60218	0.000218872	0.00459125	up	-	-	-	-	-	-	-	-	cellular_component:chloroplast(GO:0009507);;cellular_component:chloroplast(GO:0009507);;cellular_component:plastid(GO:0009536);;molecular_function:metal ion binding(GO:0046872);;molecular_function:DNA binding(GO:0003677);;biological_process:transcription, DNA-templated(GO:0006351);;biological_process:regulation of transcription, DNA-templated(GO:0006355)	-	3694.POPTR_0010s10950.1|-107.9|COG5048|S|Zinc finger protein	-	Q8GYC1|IDD4_ARATH|-101.1|Protein indeterminate-domain 4, chloroplastic OS=Arabidopsis thaliana GN=IDD4 PE=1 SV=1	XP_008460216.1|-116.9|PREDICTED: protein indeterminate-domain 5, chloroplastic [Cucumis melo]
c203901_g1	cluster 1	2.53217	0.000192392	0.00442477	up	2.04878	0.000682501	0.00817839	up	1.41155	0.00141239	0.0306183	up	-	-	4641.GSMUA_Achr9P14990_001|-60.0|ENOG410YGRZ|S|RNA recognition motif. (a.k.a. RRM, RBD, or RNP domain)	-	-	XP_020255808.1|-63.1|28 kDa ribonucleoprotein, chloroplastic-like [Asparagus officinalis]
c204100_g1	cluster 2	2.39181	0.0079145	0.0278234	up	2.34808	0.0111441	0.0360653	up	-	-	-	-	cellular_component:thylakoid(GO:0009579);;biological_process:chlorophyll catabolic process(GO:0015996);;cellular_component:membrane(GO:0016020);;cellular_component:integral component of membrane(GO:0016021);;molecular_function:oxidoreductase activity(GO:0016491);;molecular_function:chlorophyll(ide) b reductase activity(GO:0034256);;biological_process:oxidation-reduction process(GO:0055114);;cellu…	egu:105040808|-210.1|K13606|NOL, NYC1; chlorophyll(ide) b reductase [EC:1.1.1.294]|ko00860|Porphyrin and chlorophyll metabolism;;	4641.GSMUA_Achr10P26390_001|-207.7|COG1028|S|Dehydrogenase reductase	-	Q5N800|NYC1_ORYSJ|-196.8|Probable chlorophyll(ide) b reductase NYC1, chloroplastic OS=Oryza sativa subsp. japonica GN=NYC1 PE=1 SV=1	XP_020276037.1|-228.0|probable chlorophyll(ide) b reductase NYC1, chloroplastic [Asparagus officinalis]
c204216_g1	cluster 3	-1.51366	5.37782e-05	0.00351314	down	-1.49817	0.000114477	0.00485536	down	-	-	-	-	cellular_component:plastid(GO:0009536);;molecular_function:protein binding(GO:0005515);;biological_process:red, far-red light phototransduction(GO:0009585);;molecular_function:protein binding(GO:0005515);;biological_process:response to blue light(GO:0009637);;cellular_component:nucleus(GO:0005634);;cellular_component:nucleus(GO:0005634);;cellular_component:nucleus(GO:0005634);;cellular_component:…	-	4641.GSMUA_Achr5P02460_001|-219.8|ENOG4111FQI|S|NA	-	F4IHY7|PTA12_ARATH|-185.3|Protein PLASTID TRANSCRIPTIONALLY ACTIVE 12 OS=Arabidopsis thaliana GN=PTAC12 PE=1 SV=1	XP_020273391.1|-235.9|protein PLASTID TRANSCRIPTIONALLY ACTIVE 12 [Asparagus officinalis]
c204438_g1	cluster 4	1.95759	0.00265215	0.0142691	up	1.42144	0.00625239	0.024913	up	-	-	-	-	cellular_component:chloroplast(GO:0009507);;cellular_component:chloroplast(GO:0009507);;cellular_component:plastid(GO:0009536);;molecular_function:transferase activity(GO:0016740);;molecular_function:pyridoxal phosphate binding(GO:0030170);;molecular_function:cystathionine gamma-synthase activity(GO:0003962);;biological_process:cellular amino acid biosynthetic process(GO:0008652);;biological_proc…	sot:102601571|-176.3|K01739|metB; cystathionine gamma-synthase [EC:2.5.1.48]|ko01230|Biosynthesis of amino acids;;ko00920|Sulfur metabolism;;ko00270|Cysteine and methionine metabolism;;ko00450|Selenocompound metabolism;;	3694.POPTR_0017s12240.1|-182.9|COG0626|E|cystathionine	PF01053.18|Cys_Met_Meta_PP|2.6e-129|Cys/Met metabolism PLP-dependent enzyme	P55217|CGS1_ARATH|-174.4|Cystathionine gamma-synthase 1, chloroplastic OS=Arabidopsis thaliana GN=CGS1 PE=1 SV=3	XP_020257363.1|-213.3|cystathionine gamma-synthase 1, chloroplastic-like [Asparagus officinalis]
c204695_g1	cluster 4	1.06572	0.00298122	0.0152668	up	-	-	-	-	-	-	-	-	cellular_component:plastid(GO:0009536);;cellular_component:chloroplast stroma(GO:0009570);;molecular_function:nucleotide binding(GO:0000166);;molecular_function:ATP binding(GO:0005524);;cellular_component:chloroplast(GO:0009507)	pda:103720995|-124.5|K04077|groEL, HSPD1; chaperonin GroEL|ko03018|RNA degradation;;	4641.GSMUA_Achr9P23240_001|-125.2|COG0459|O|Prevents misfolding and promotes the refolding and proper assembly of unfolded polypeptides generated under stress conditions (By similarity)	-	Q9LJE4|CPNB2_ARATH|-123.5|Chaperonin 60 subunit beta 2, chloroplastic OS=Arabidopsis thaliana GN=CPN60B2 PE=1 SV=1	XP_020249710.1|-124.0|chaperonin 60 subunit beta 2, chloroplastic [Asparagus officinalis]
c204766_g1	cluster 1	-	-	-	-	-	-	-	-	1.10509	0.000434685	0.0228341	up	-	-	3694.POPTR_0001s04720.1|-55.5|ENOG4111XYA|S|NA	-	-	XP_020083302.1|-56.5|protein EMBRYO SAC DEVELOPMENT ARREST 3, chloroplastic isoform X2 [Ananas comosus]
c204932_g1	cluster 1	1.69255	0.000146055	0.00416038	up	1.46777	0.00018816	0.00543737	up	1.11649	0.00205785	0.0342048	up	-	-	-	-	-	-
c205077_g1	cluster 1	1.99527	0.000971509	0.00839799	up	2.23389	5.15009e-05	0.00416009	up	-	-	-	-	cellular_component:plastid(GO:0009536);;molecular_function:triose-phosphate:phosphate antiporter activity(GO:0009670);;molecular_function:phosphoenolpyruvate:phosphate antiporter activity(GO:0015121);;biological_process:phosphoenolpyruvate transport(GO:0015714);;cellular_component:membrane(GO:0016020);;cellular_component:integral component of membrane(GO:0016021);;cellular_component:chloroplast m…	-	29760.VIT_17s0000g08560.t01|-123.1|ENOG410XP1S|S|solute carrier family 35 member	PF03151.14|TPT|8.9e-115|Triose-phosphate Transporter family	Q84QU8|PPT2_ORYSJ|-118.9|Phosphoenolpyruvate/phosphate translocator 2, chloroplastic OS=Oryza sativa subsp. japonica GN=PPT2 PE=2 SV=1	XP_020259752.1|-121.2|phosphoenolpyruvate/phosphate translocator 1, chloroplastic-like [Asparagus officinalis]
c205182_g1	cluster 1	2.93939	0.000142583	0.00415335	up	3.74678	1.48185e-05	0.00363332	up	3.92605	1.33664e-05	0.0138245	up	cellular_component:plastid(GO:0009536);;cellular_component:chloroplast stroma(GO:0009570);;molecular_function:lyase activity(GO:0016829);;molecular_function:metal ion binding(GO:0046872);;molecular_function:iron-sulfur cluster binding(GO:0051536);;molecular_function:4 iron, 4 sulfur cluster binding(GO:0051539);;biological_process:thiamine biosynthetic process(GO:0009228);;biological_process:thiam…	pxb:103963218|-10000.0|K03147|thiC; phosphomethylpyrimidine synthase [EC:4.1.99.17]|ko00730|Thiamine metabolism;;	3694.POPTR_0009s04780.1|-10000.0|COG0422|H|thiamine diphosphate biosynthetic process	PF01964.16|ThiC_Rad_SAM|9.2e-196|Radical SAM ThiC family	O82392|THIC_ARATH|-10000.0|Phosphomethylpyrimidine synthase, chloroplastic OS=Arabidopsis thaliana GN=THIC PE=1 SV=1	XP_020252397.1|-10000.0|phosphomethylpyrimidine synthase, chloroplastic [Asparagus officinalis]
c205581_g1	cluster 3	-	-	-	-	-1.16829	0.000436194	0.00700535	down	-1.11095	0.000155608	0.0197638	down	-	-	4555.Si021458m|-77.2|ENOG410YC73|S|protein CHUP1, chloroplastic-like	-	-	XP_020241526.1|-127.4|protein CHUP1, chloroplastic-like isoform X4 [Asparagus officinalis]
c205586_g1	cluster 2	2.61489	3.89421e-05	0.0033713	up	2.09614	0.00135974	0.0108842	up	1.30812	0.000154935	0.0197638	up	cellular_component:chloroplast(GO:0009507);;cellular_component:plastid(GO:0009536);;cellular_component:chloroplast stroma(GO:0009570);;molecular_function:hydrolase activity(GO:0016787);;biological_process:proteolysis(GO:0006508);;molecular_function:peptidase activity(GO:0008233);;molecular_function:serine-type peptidase activity(GO:0008236)	-	29760.VIT_12s0028g01250.t01|-101.6|COG0740|O|Cleaves peptides in various proteins in a process that requires ATP hydrolysis. Has a chymotrypsin-like activity. Plays a major role in the degradation of misfolded proteins (By similarity)	PF00574.21|CLP_protease|1e-70|Clp protease	Q94B60|CLPP4_ARATH|-96.6|ATP-dependent Clp protease proteolytic subunit 4, chloroplastic OS=Arabidopsis thaliana GN=CLPP4 PE=1 SV=1	XP_020247842.1|-108.1|ATP-dependent Clp protease proteolytic subunit 4, chloroplastic [Asparagus officinalis]
c205616_g1	cluster 1	2.5272	4.74038e-05	0.00349663	up	2.81782	0.00015419	0.00516826	up	2.50664	0.000634439	0.0249744	up	cellular_component:chloroplast(GO:0009507);;cellular_component:plastid inner membrane(GO:0009528);;cellular_component:plastid(GO:0009536);;cellular_component:chloroplast inner membrane(GO:0009706);;cellular_component:membrane(GO:0016020);;cellular_component:integral component of membrane(GO:0016021);;molecular_function:hydrolase activity(GO:0016787);;molecular_function:metal ion binding(GO:004687…	-	3711.Bra005598.1-P|-129.7|COG0750|M|Membrane-associated zinc metalloprotease	-	O23053|ARAS2_ARATH|-128.1|Probable membrane metalloprotease ARASP2, chloroplastic OS=Arabidopsis thaliana GN=ARASP2 PE=2 SV=1	XP_008804310.1|-141.7|PREDICTED: probable membrane metalloprotease ARASP2, chloroplastic [Phoenix dactylifera]
c206088_g1	cluster 1	1.42992	0.00121728	0.00944236	up	1.7752	0.000690695	0.0082127	up	2.21067	0.000628033	0.0248672	up	biological_process:glycolytic process(GO:0006096);;biological_process:glycolytic process(GO:0006096);;biological_process:glycolytic process(GO:0006096);;cellular_component:chloroplast(GO:0009507);;cellular_component:plastid(GO:0009536);;cellular_component:plastoglobule(GO:0010287);;molecular_function:lyase activity(GO:0016829);;molecular_function:fructose-bisphosphate aldolase activity(GO:0004332…	egu:105048474|-192.6|K01623|ALDO; fructose-bisphosphate aldolase, class I [EC:4.1.2.13]|ko00710|Carbon fixation in photosynthetic organisms;;ko01200|Carbon metabolism;;ko01230|Biosynthesis of amino acids;;ko00030|Pentose phosphate pathway;;ko00051|Fructose and mannose metabolism;;ko00010|Glycolysis / Gluconeogenesis;;	29760.VIT_01s0011g04350.t01|-191.7|COG3588|G|fructose-bisphosphate aldolase	PF00274.17|Glycolytic|2.3e-157|Fructose-bisphosphate aldolase class-I	Q9ZU52|ALFP3_ARATH|-181.8|Fructose-bisphosphate aldolase 3, chloroplastic OS=Arabidopsis thaliana GN=FBA3 PE=1 SV=1	XP_020251673.1|-199.9|fructose-bisphosphate aldolase 1, chloroplastic-like [Asparagus officinalis]
c206193_g1	cluster 1	2.64994	0.000367988	0.00555372	up	2.89365	0.000284921	0.00622332	up	2.80131	0.00122952	0.0294841	up	cellular_component:chloroplast(GO:0009507);;cellular_component:plastid(GO:0009536);;biological_process:photosynthesis(GO:0015979);;biological_process:chlorophyll biosynthetic process(GO:0015995);;biological_process:chlorophyll biosynthetic process(GO:0015995);;molecular_function:magnesium chelatase activity(GO:0016851);;molecular_function:ligase activity(GO:0016874);;molecular_function:nucleotide…	pxb:103944127|-177.9|K03405|chlI, bchI; magnesium chelatase subunit I [EC:6.6.1.1]|ko00860|Porphyrin and chlorophyll metabolism;;	4533.OB03G32320.1|-178.3|COG1239|H|magnesium chelatase	-	Q53RM0|CHLI_ORYSJ|-178.6|Magnesium-chelatase subunit ChlI, chloroplastic OS=Oryza sativa subsp. japonica GN=CHLI PE=1 SV=1	XP_020273053.1|-198.6|magnesium-chelatase subunit ChlI, chloroplastic-like [Asparagus officinalis]
c206286_g2	cluster 3	-	-	-	-	-2.71211	0.00270562	0.0153994	down	-	-	-	-	molecular_function:linoleate 13S-lipoxygenase activity(GO:0016165);;molecular_function:oxidoreductase activity(GO:0016491);;biological_process:oxylipin biosynthetic process(GO:0031408);;biological_process:oxylipin biosynthetic process(GO:0031408);;molecular_function:metal ion binding(GO:0046872);;molecular_function:dioxygenase activity(GO:0051213);;biological_process:oxidation-reduction process(G…	pda:103708655|-10000.0|K00454|LOX2S; lipoxygenase [EC:1.13.11.12]|ko00591|Linoleic acid metabolism;;ko00592|alpha-Linolenic acid metabolism;;	4538.ORGLA04G0110300.1|-10000.0|ENOG410YN4N|S|Plant lipoxygenase may be involved in a number of diverse aspects of plant physiology including growth and development, pest resistance, and senescence or responses to wounding (By similarity)	PF00305.17|Lipoxygenase|7.2e-298|Lipoxygenase	Q7XV13|LOX5_ORYSJ|-10000.0|Putative lipoxygenase 5 OS=Oryza sativa subsp. japonica GN=Os04g0447100 PE=3 SV=2	XP_008791914.1|-10000.0|PREDICTED: putative lipoxygenase 5 [Phoenix dactylifera]
c206521_g1	cluster 3	-	-	-	-	-1.19846	0.00141514	0.0110599	down	-	-	-	-	biological_process:ion transport(GO:0006811);;cellular_component:chloroplast(GO:0009507);;cellular_component:chloroplast thylakoid membrane(GO:0009535);;cellular_component:plastid(GO:0009536);;cellular_component:thylakoid(GO:0009579);;cellular_component:membrane(GO:0016020);;cellular_component:integral component of membrane(GO:0016021);;molecular_function:cAMP binding(GO:0030552);;molecular_funct…	egu:105053134|-263.4|K05391|CNGF; cyclic nucleotide gated channel, other eukaryote|ko04626|Plant-pathogen interaction;;	4558.Sb04g034650.1|-248.9|ENOG41111V9|S|cyclic nucleotide-gated ion channel	-	Q9LD37|CNG20_ARATH|-217.7|Probable cyclic nucleotide-gated ion channel 20, chloroplastic OS=Arabidopsis thaliana GN=CNGC20 PE=2 SV=1	XP_020599130.1|-267.2|probable cyclic nucleotide-gated ion channel 20, chloroplastic [Phalaenopsis equestris]
c207201_g1	cluster 1	1.70008	0.00323305	0.0159688	up	1.84586	0.003915	0.0189055	up	-	-	-	-	-	-	-	-	-	XP_020276089.1|-48.6|thioredoxin-like 3-2, chloroplastic isoform X1 [Asparagus officinalis]
c207335_g1	cluster 2	2.89555	7.24534e-06	0.00256158	up	2.40991	4.46358e-05	0.00403179	up	1.68983	0.00359763	0.042412	up	molecular_function:fructokinase activity(GO:0008865);;cellular_component:chloroplast(GO:0009507);;cellular_component:chloroplast(GO:0009507);;cellular_component:plastid(GO:0009536);;molecular_function:kinase activity(GO:0016301);;biological_process:phosphorylation(GO:0016310);;molecular_function:transferase activity(GO:0016740);;biological_process:starch biosynthetic process(GO:0019252);;molecula…	cam:101495617|-159.7|K00847|E2.7.1.4, scrK; fructokinase [EC:2.7.1.4]|ko00520|Amino sugar and nucleotide sugar metabolism;;ko00500|Starch and sucrose metabolism;;ko00051|Fructose and mannose metabolism;;	4641.GSMUA_Achr5P05850_001|-160.0|COG0524|G|pfkb domain protein	PF00294.22|PfkB|3.3e-78|pfkB family carbohydrate kinase	Q9C524|SCRK6_ARATH|-153.5|Probable fructokinase-6, chloroplastic OS=Arabidopsis thaliana GN=At1g66430 PE=2 SV=1	XP_021296708.1|-159.9|probable fructokinase-6, chloroplastic [Herrania umbratica]
c207459_g1	cluster 4	-	-	-	-	-1.57058	0.00755602	0.0281194	down	-1.80065	0.00327765	0.0410857	down	biological_process:abscisic acid biosynthetic process(GO:0009688);;molecular_function:oxidoreductase activity(GO:0016491);;molecular_function:9-cis-epoxycarotenoid dioxygenase activity(GO:0045549);;molecular_function:metal ion binding(GO:0046872);;molecular_function:dioxygenase activity(GO:0051213);;biological_process:oxidation-reduction process(GO:0055114);;cellular_component:chloroplast(GO:0009…	egu:105059614|-215.4|K09840|NCED; 9-cis-epoxycarotenoid dioxygenase [EC:1.13.11.51]|ko00906|Carotenoid biosynthesis;;	4641.GSMUA_Achr4P22870_001|-208.0|COG3670|Q|dioxygenase	PF03055.13|RPE65|1e-78|Retinal pigment epithelial membrane protein	C3VEQ3|NCED_ONCHC|-205.1|9-cis-epoxycarotenoid dioxygenase, chloroplastic OS=Oncidium hybrid cultivar GN=NCED PE=2 SV=1	AGI98130.1|-221.6|9-cis-epoxycarotenoid dioxygenase [Narcissus tazetta]
c207742_g1	cluster 1	2.13354	0.000193021	0.00442706	up	2.43715	0.000118027	0.00491379	up	2.03038	0.00019226	0.0197638	up	biological_process:glycerol biosynthetic process(GO:0006114);;biological_process:riboflavin biosynthetic process(GO:0009231);;biological_process:dephosphorylation(GO:0016311);;molecular_function:hydrolase activity(GO:0016787);;molecular_function:glycerol-3-phosphatase activity(GO:0043136);;molecular_function:metal ion binding(GO:0046872);;molecular_function:glycerol-1-phosphatase activity(GO:0000…	-	4641.GSMUA_Achr9P22850_001|-95.4|COG0637|S|HAD-superfamily hydrolase subfamily IA variant 3	-	F4JTE7|GPP1_ARATH|-93.7|(DL)-glycerol-3-phosphatase 1, mitochondrial OS=Arabidopsis thaliana GN=GPP1 PE=1 SV=1	ONK70544.1|-101.8|uncharacterized protein A4U43_C05F34810 [Asparagus officinalis]
c208164_g1	cluster 2	1.29991	0.000132303	0.00411969	up	1.03475	0.000530524	0.00746752	up	-	-	-	-	biological_process:lipid metabolic process(GO:0006629);;biological_process:phospholipid biosynthetic process(GO:0008654);;cellular_component:membrane(GO:0016020);;cellular_component:integral component of membrane(GO:0016021);;molecular_function:transferase activity(GO:0016740);;cellular_component:mitochondrion(GO:0005739);;cellular_component:mitochondrial inner membrane(GO:0005743);;cellular_comp…	egu:105057029|-85.9|K00995|pgsA, PGS1; CDP-diacylglycerol--glycerol-3-phosphate 3-phosphatidyltransferase [EC:2.7.8.5]|ko00564|Glycerophospholipid metabolism;;	4555.Si035919m|-84.5|COG0558|I|cdp-diacylglycerol-glycerol-3-phosphate 3-phosphatidyltransferase	-	Q8H8U0|CLS_ORYSJ|-85.0|Cardiolipin synthase (CMP-forming), mitochondrial OS=Oryza sativa subsp. japonica GN=Os03g0283600 PE=2 SV=1	XP_010937763.1|-85.1|PREDICTED: CDP-diacylglycerol--glycerol-3-phosphate 3-phosphatidyltransferase 2 [Elaeis guineensis]
c208209_g1	cluster 3	-1.553	0.00395051	0.0179583	down	-4.6818	0.000511599	0.00738667	down	-	-	-	-	cellular_component:chloroplast(GO:0009507);;cellular_component:chloroplast(GO:0009507);;cellular_component:plastid(GO:0009536)	egu:105042708|-64.9|K13993|HSP20; HSP20 family protein|ko04141|Protein processing in endoplasmic reticulum;;	4558.Sb01g041180.1|-60.9|COG0071|O|response to heat	-	Q00445|HS21C_WHEAT|-59.8|Small heat shock protein, chloroplastic OS=Triticum aestivum GN=HSP21 PE=2 SV=1	AFP96754.1|-75.9|chloroplast small heat shock protein [Agave americana]
c208240_g1	cluster 1	1.52706	0.000806456	0.00775063	up	1.04876	0.00279591	0.0156932	up	1.72865	0.00153456	0.0312715	up	-	-	-	-	-	-
c208266_g1	cluster 2	1.16865	0.00342173	0.0164856	up	1.15315	0.00403626	0.0192143	up	-	-	-	-	cellular_component:chloroplast(GO:0009507);;cellular_component:chloroplast(GO:0009507);;cellular_component:plastid(GO:0009536);;molecular_function:transferase activity(GO:0016740);;biological_process:methylation(GO:0032259);;molecular_function:RNA binding(GO:0003723);;biological_process:rRNA processing(GO:0006364);;molecular_function:methyltransferase activity(GO:0008168)	-	4641.GSMUA_Achr4P19670_001|-116.3|COG0030|J|Specifically dimethylates two adjacent adenosines (A1518 and A1519) in the loop of a conserved hairpin near the 3'-end of 16S rRNA in the 30S particle. May play a critical role in biogenesis of 30S subunits (By similarity)	-	O65090|DIM1C_ARATH|-109.5|Ribosomal RNA small subunit methyltransferase, chloroplastic OS=Arabidopsis thaliana GN=PFC1 PE=2 SV=1	XP_020243747.1|-123.9|ribosomal RNA small subunit methyltransferase, chloroplastic isoform X1 [Asparagus officinalis]
c208393_g1	cluster 1	1.83441	0.00160759	0.0108726	up	1.44185	0.00192962	0.0127521	up	-	-	-	-	molecular_function:hydrolase activity(GO:0016787);;molecular_function:metal ion binding(GO:0046872);;molecular_function:ADP-ribose diphosphatase activity(GO:0047631);;molecular_function:FAD diphosphatase activity(GO:0047884);;cellular_component:chloroplast(GO:0009507);;cellular_component:chloroplast(GO:0009507);;cellular_component:plastid(GO:0009536)	pda:103717961|-90.1|K18453|NUDT23; ADP-ribose/FAD diphosphatase [EC:3.6.1.13 3.6.1.18]|ko00230|Purine metabolism;;ko00740|Riboflavin metabolism;;	4641.GSMUA_Achr11P07380_001|-90.6|COG1051|F|NUDiX hydrolase	-	P93740|NUD23_ARATH|-78.6|Nudix hydrolase 23, chloroplastic OS=Arabidopsis thaliana GN=NUDT23 PE=1 SV=2	XP_020275964.1|-105.9|nudix hydrolase 23, chloroplastic [Asparagus officinalis]
c208396_g1	cluster 1	1.52278	0.000659128	0.00709393	up	1.63371	0.000414483	0.00687404	up	1.40209	0.000686159	0.0252622	up	cellular_component:chloroplast thylakoid membrane(GO:0009535);;cellular_component:chloroplast thylakoid membrane(GO:0009535);;cellular_component:plastid(GO:0009536);;cellular_component:thylakoid(GO:0009579);;cellular_component:membrane(GO:0016020);;molecular_function:transferase activity(GO:0016740);;biological_process:reductive pentose-phosphate cycle(GO:0019253);;molecular_function:metal ion bi…	pda:103723776|-248.5|K00615|E2.2.1.1, tktA, tktB; transketolase [EC:2.2.1.1]|ko00710|Carbon fixation in photosynthetic organisms;;ko01200|Carbon metabolism;;ko01230|Biosynthesis of amino acids;;ko00030|Pentose phosphate pathway;;	4113.PGSC0003DMT400056799|-247.2|COG0021|G|Transketolase	PF00456.19|Transketolase_N|1.5e-154|Transketolase, thiamine diphosphate binding domain	Q43848|TKTC_SOLTU|-248.4|Transketolase, chloroplastic OS=Solanum tuberosum PE=2 SV=1	XP_008813030.1|-247.7|PREDICTED: transketolase, chloroplastic [Phoenix dactylifera]
c208396_g2	cluster 1	2.15836	0.00231983	0.0132454	up	1.93404	0.00419817	0.0196923	up	1.64028	0.00350281	0.0420409	up	cellular_component:plastid(GO:0009536);;cellular_component:thylakoid(GO:0009579);;cellular_component:membrane(GO:0016020);;molecular_function:transferase activity(GO:0016740);;biological_process:reductive pentose-phosphate cycle(GO:0019253);;molecular_function:metal ion binding(GO:0046872);;molecular_function:transketolase activity(GO:0004802);;cellular_component:chloroplast(GO:0009507);;cellular…	zma:100279513|-106.9|K00615|E2.2.1.1, tktA, tktB; transketolase [EC:2.2.1.1]|ko00710|Carbon fixation in photosynthetic organisms;;ko01200|Carbon metabolism;;ko01230|Biosynthesis of amino acids;;ko00030|Pentose phosphate pathway;;	4577.GRMZM2G033208_P01|-108.1|COG0021|G|Transketolase	-	Q7SIC9|TKTC_MAIZE|-109.3|Transketolase, chloroplastic OS=Zea mays PE=1 SV=1	XP_020272032.1|-106.5|transketolase, chloroplastic-like [Asparagus officinalis]
c208425_g1	cluster 2	1.95271	0.000871711	0.00800819	up	-	-	-	-	-	-	-	-	-	-	3694.POPTR_0005s12300.1|-141.3|COG0596|S|Alpha beta hydrolase	-	Q9M2A1|PP263_ARATH|-85.6|Pentatricopeptide repeat-containing protein At3g42630 OS=Arabidopsis thaliana GN=At3g42630 PE=2 SV=2	XP_020251518.1|-155.7|pheophytinase, chloroplastic [Asparagus officinalis]
c208500_g1	cluster 5	-	-	-	-	-	-	-	-	-	-	-	-	biological_process:cellular amino acid biosynthetic process(GO:0008652);;cellular_component:chloroplast(GO:0009507);;cellular_component:chloroplast(GO:0009507);;cellular_component:plastid(GO:0009536);;molecular_function:oxidoreductase activity(GO:0016491);;biological_process:oxidation-reduction process(GO:0055114);;molecular_function:N-acetyl-gamma-glutamyl-phosphate reductase activity(GO:0003942…	nnu:104608189|-167.3|K00145|argC; N-acetyl-gamma-glutamyl-phosphate reductase [EC:1.2.1.38]|ko01230|Biosynthesis of amino acids;;ko00220|Arginine biosynthesis;;ko01210|2-Oxocarboxylic acid metabolism;;	4641.GSMUA_Achr10P28580_001|-164.2|COG0002|E|N-acetylglutamate semialdehyde dehydrogenase	-	Q6AV34|ARGC_ORYSJ|-156.8|Probable N-acetyl-gamma-glutamyl-phosphate reductase, chloroplastic OS=Oryza sativa subsp. japonica GN=Os03g0617900 PE=1 SV=1	ONK64838.1|-169.2|uncharacterized protein A4U43_C07F30510 [Asparagus officinalis]
c208520_g1	cluster 1	1.21225	0.00152407	0.0105593	up	1.34908	0.00037404	0.00664373	up	-	-	-	-	cellular_component:chloroplast(GO:0009507);;cellular_component:plastid(GO:0009536);;molecular_function:antiporter activity(GO:0015297);;cellular_component:membrane(GO:0016020);;cellular_component:integral component of membrane(GO:0016021);;cellular_component:chloroplast membrane(GO:0031969);;biological_process:transport(GO:0006810);;biological_process:ion transport(GO:0006811);;biological_process…	-	4641.GSMUA_Achr1P06840_001|-10000.0|COG1226|P|PotAssium voltage-gated channel	-	Q9ZTZ7|KEA1_ARATH|-10000.0|K(+) efflux antiporter 1, chloroplastic OS=Arabidopsis thaliana GN=KEA1 PE=1 SV=2	XP_018683907.1|-10000.0|PREDICTED: K(+) efflux antiporter 2, chloroplastic-like [Musa acuminata subsp. malaccensis]
c208528_g1	cluster 3	-2.21314	0.000166438	0.00425561	down	-3.20478	0.000363333	0.00660464	down	-	-	-	-	cellular_component:plastid(GO:0009536);;biological_process:lipid catabolic process(GO:0016042);;molecular_function:hydrolase activity(GO:0016787);;biological_process:lipid metabolic process(GO:0006629);;cellular_component:chloroplast(GO:0009507);;cellular_component:chloroplast(GO:0009507)	-	29760.VIT_10s0003g04230.t01|-150.0|ENOG410Y942|S|phospholipase A1-Igamma1, chloroplastic-like	-	Q9C8J6|PLA17_ARATH|-79.1|Phospholipase A1-Igamma3, chloroplastic OS=Arabidopsis thaliana GN=At1g51440 PE=1 SV=1	XP_020275066.1|-178.4|phospholipase A1-Igamma1, chloroplastic [Asparagus officinalis]
c208697_g1	cluster 1	1.96056	0.000412423	0.00580773	up	2.26026	0.000208667	0.0056185	up	1.88056	0.00200261	0.033848	up	biological_process:tricarboxylic acid cycle(GO:0006099);;molecular_function:oxidoreductase activity(GO:0016491);;molecular_function:metal ion binding(GO:0046872);;biological_process:oxidation-reduction process(GO:0055114);;molecular_function:isocitrate dehydrogenase (NAD+) activity(GO:0004449);;cellular_component:mitochondrion(GO:0005739);;cellular_component:mitochondrion(GO:0005739)	pda:103701351|-173.6|K00030|IDH3; isocitrate dehydrogenase (NAD+) [EC:1.1.1.41]|ko00020|Citrate cycle (TCA cycle);;ko01230|Biosynthesis of amino acids;;ko01210|2-Oxocarboxylic acid metabolism;;ko01200|Carbon metabolism;;	29760.VIT_08s0040g01700.t01|-173.9|COG0473|E|3-isopropylmalate dehydrogenase activity	PF00180.18|Iso_dh|3e-108|Isocitrate/isopropylmalate dehydrogenase	Q945K7|IDH5_ARATH|-167.2|Isocitrate dehydrogenase [NAD] catalytic subunit 5, mitochondrial OS=Arabidopsis thaliana GN=IDH5 PE=1 SV=1	XP_020673691.1|-176.1|isocitrate dehydrogenase [NAD] catalytic subunit 5, mitochondrial-like [Dendrobium catenatum]
c208807_g1	cluster 4	-	-	-	-	-1.18808	0.00302951	0.0163758	down	-	-	-	-	-	-	-	-	-	-
c208998_g1	cluster 2	-	-	-	-	-	-	-	-	-	-	-	-	cellular_component:chromoplast(GO:0009509);;cellular_component:plastid(GO:0009536);;biological_process:carotenoid biosynthetic process(GO:0016117);;molecular_function:oxidoreductase activity(GO:0016491);;molecular_function:9,9'-dicis-carotene:quinone oxidoreductase activity(GO:0052886);;molecular_function:7,9,9'-tricis-neurosporene:quinone oxidoreductase activity(GO:0052887);;biological_process:9…	vvi:100245154|-243.7|K00514|ZDS, crtQ; zeta-carotene desaturase [EC:1.3.5.6]|ko00906|Carotenoid biosynthesis;;	29760.VIT_14s0030g01740.t01|-245.0|COG3349|S|Desaturase	-	O49901|ZDS_NARPS|-254.9|Zeta-carotene desaturase, chloroplastic/chromoplastic OS=Narcissus pseudonarcissus GN=ZDS1 PE=2 SV=1	XP_020257225.1|-253.1|zeta-carotene desaturase, chloroplastic/chromoplastic [Asparagus officinalis]
c209049_g1	cluster 1	1.04846	0.00517712	0.0212422	up	1.10286	0.00484065	0.0214364	up	-	-	-	-	biological_process:cellular amino acid biosynthetic process(GO:0008652);;cellular_component:chloroplast(GO:0009507);;cellular_component:chloroplast(GO:0009507);;cellular_component:plastid(GO:0009536);;molecular_function:oxidoreductase activity(GO:0016491);;molecular_function:metal ion binding(GO:0046872);;biological_process:oxidation-reduction process(GO:0055114);;biological_process:histidine bio…	egu:105046721|-214.3|K00013|hisD; histidinol dehydrogenase [EC:1.1.1.23]|ko01230|Biosynthesis of amino acids;;ko00340|Histidine metabolism;;	4555.Si035006m|-214.5|COG0141|E|Catalyzes the sequential NAD-dependent oxidations of L- histidinol to L-histidinaldehyde and then to L-histidine (By similarity)	PF00815.18|Histidinol_dh|2.8e-160|Histidinol dehydrogenase	Q5NAY4|HISX_ORYSJ|-212.3|Histidinol dehydrogenase, chloroplastic OS=Oryza sativa subsp. japonica GN=HDH PE=2 SV=1	XP_020275687.1|-227.5|histidinol dehydrogenase, chloroplastic isoform X1 [Asparagus officinalis]
c209405_g1	cluster 3	-	-	-	-	-	-	-	-	-	-	-	-	-	-	4081.Solyc12g007100.1.1|-198.6|COG0464|O|Aaa atpase	-	-	XP_020269963.1|-231.2|uncharacterized protein LOC109845161 [Asparagus officinalis]
c209432_g1	cluster 2	1.42648	0.011411	0.0354775	up	-	-	-	-	-	-	-	-	cellular_component:chloroplast(GO:0009507);;cellular_component:chloroplast thylakoid membrane(GO:0009535);;cellular_component:plastid(GO:0009536);;cellular_component:thylakoid(GO:0009579);;cellular_component:membrane(GO:0016020);;molecular_function:kinase activity(GO:0016301);;biological_process:phosphorylation(GO:0016310);;molecular_function:transferase activity(GO:0016740);;molecular_function:n…	-	4641.GSMUA_Achr7P17230_001|-98.7|ENOG410XPP3|T|Cyclin-Dependent Kinase	-	Q9S713|STT7_ARATH|-90.6|Serine/threonine-protein kinase STN7, chloroplastic OS=Arabidopsis thaliana GN=STN7 PE=1 SV=1	XP_020265049.1|-98.8|serine/threonine-protein kinase STN7, chloroplastic [Asparagus officinalis]
c209432_g2	cluster 1	1.1577	0.00535406	0.0216845	up	1.25573	0.00309387	0.0165529	up	-	-	-	-	cellular_component:chloroplast(GO:0009507);;cellular_component:chloroplast thylakoid membrane(GO:0009535);;cellular_component:plastid(GO:0009536);;cellular_component:thylakoid(GO:0009579);;cellular_component:membrane(GO:0016020);;molecular_function:kinase activity(GO:0016301);;biological_process:phosphorylation(GO:0016310);;molecular_function:transferase activity(GO:0016740);;molecular_function:n…	-	4555.Si024736m|-150.6|ENOG410XPP3|T|Cyclin-Dependent Kinase	-	Q9S713|STT7_ARATH|-149.8|Serine/threonine-protein kinase STN7, chloroplastic OS=Arabidopsis thaliana GN=STN7 PE=1 SV=1	XP_020265049.1|-160.9|serine/threonine-protein kinase STN7, chloroplastic [Asparagus officinalis]
c209450_g1	cluster 2	1.76481	2.89141e-05	0.00327353	up	1.19249	0.00258017	0.0149859	up	-	-	-	-	cellular_component:chloroplast(GO:0009507);;cellular_component:plastid(GO:0009536);;cellular_component:chloroplast stroma(GO:0009570)	-	4641.GSMUA_Achr2P08390_001|-157.2|COG0740|O|Cleaves peptides in various proteins in a process that requires ATP hydrolysis. Has a chymotrypsin-like activity. Plays a major role in the degradation of misfolded proteins (By similarity)	-	Q9XJ35|CLPR1_ARATH|-141.3|ATP-dependent Clp protease proteolytic subunit-related protein 1, chloroplastic OS=Arabidopsis thaliana GN=CLPR1 PE=1 SV=1	XP_020259198.1|-165.8|ATP-dependent Clp protease proteolytic subunit-related protein 1, chloroplastic [Asparagus officinalis]
c209451_g1	cluster 1	1.06284	0.00549426	0.0220443	up	1.31865	0.0019529	0.0128383	up	1.77708	0.0017655	0.0328039	up	-	-	-	-	-	-
c209469_g1	cluster 1	1.77985	0.000120832	0.00406677	up	2.03992	8.71525e-05	0.0044526	up	2.01331	0.000946994	0.0273391	up	-	-	-	-	-	-
c209518_g2	cluster 1	1.49615	0.00386903	0.0177409	up	1.40098	0.00401473	0.0191609	up	-	-	-	-	biological_process:lysine biosynthetic process via diaminopimelate(GO:0009089);;cellular_component:chloroplast(GO:0009507);;cellular_component:chloroplast(GO:0009507);;cellular_component:plastid(GO:0009536);;molecular_function:lyase activity(GO:0016829);;molecular_function:carboxy-lyase activity(GO:0016831);;biological_process:cellular amino acid biosynthetic process(GO:0008652);;molecular_functi…	egu:105051470|-98.7|K01586|lysA; diaminopimelate decarboxylase [EC:4.1.1.20]|ko01230|Biosynthesis of amino acids;;ko00300|Lysine biosynthesis;;	4641.GSMUA_Achr2P14290_001|-98.2|COG0019|E|Specifically catalyzes the decarboxylation of meso- diaminopimelate (meso-DAP) to L-lysine (By similarity)	-	Q949X7|DCDA1_ARATH|-96.5|Diaminopimelate decarboxylase 1, chloroplastic OS=Arabidopsis thaliana GN=LYSA1 PE=1 SV=1	XP_020257197.1|-98.5|diaminopimelate decarboxylase 1, chloroplastic-like [Asparagus officinalis]
c209751_g2	cluster 1	1.3185	0.00046737	0.00614404	up	1.32415	0.000466564	0.00711897	up	-	-	-	-	cellular_component:chloroplast(GO:0009507);;cellular_component:plastid(GO:0009536);;molecular_function:transferase activity(GO:0016740);;molecular_function:transferase activity, transferring glycosyl groups(GO:0016757);;biological_process:pyridine nucleotide biosynthetic process(GO:0019363);;molecular_function:nicotinate-nucleotide diphosphorylase (carboxylating) activity(GO:0004514);;biological_…	mtr:MTR_1g030750|-149.5|K00767|nadC, QPRT; nicotinate-nucleotide pyrophosphorylase (carboxylating) [EC:2.4.2.19]|ko00760|Nicotinate and nicotinamide metabolism;;	29760.VIT_01s0011g04800.t01|-146.3|COG0157|H|nicotinate-nucleotide diphosphorylase (carboxylating) activity	-	Q9ZU32|NADC_ARATH|-145.9|Nicotinate-nucleotide pyrophosphorylase [carboxylating], chloroplastic OS=Arabidopsis thaliana GN=QPT PE=2 SV=2	XP_020275005.1|-152.6|nicotinate-nucleotide pyrophosphorylase [carboxylating], chloroplastic [Asparagus officinalis]
c210032_g1	cluster 1	1.62479	6.01671e-05	0.00355789	up	1.46044	1.63454e-05	0.00363332	up	1.15046	0.0041944	0.0450994	up	molecular_function:oxidoreductase activity(GO:0016491);;molecular_function:dihydropyrimidine dehydrogenase (NADP+) activity(GO:0017113);;biological_process:beta-alanine biosynthetic process(GO:0019483);;biological_process:oxidation-reduction process(GO:0055114);;cellular_component:chloroplast(GO:0009507);;cellular_component:chloroplast(GO:0009507);;cellular_component:plastid(GO:0009536)	fve:101301107|-198.1|K00207|DPYD; dihydropyrimidine dehydrogenase (NADP+) [EC:1.3.1.2]|ko00770|Pantothenate and CoA biosynthesis;;ko00240|Pyrimidine metabolism;;ko00410|beta-Alanine metabolism;;	4538.ORGLA02G0272200.1|-198.0|COG0167|F|Catalyzes the conversion of dihydroorotate to orotate	-	Q9LVI9|DPYD_ARATH|-192.3|Dihydropyrimidine dehydrogenase (NADP(+)), chloroplastic OS=Arabidopsis thaliana GN=PYD1 PE=1 SV=1	XP_011084738.2|-197.7|dihydropyrimidine dehydrogenase (NADP(+)), chloroplastic [Sesamum indicum]
c210033_g1	cluster 2	1.45954	0.000286482	0.0050615	up	1.37556	0.00181108	0.0123699	up	-	-	-	-	-	-	-	-	-	-
c210087_g1	cluster 1	1.72327	0.0131802	0.0390392	up	-	-	-	-	-	-	-	-	cellular_component:membrane(GO:0016020);;cellular_component:chloroplast membrane(GO:0031969);;cellular_component:chloroplast(GO:0009507);;cellular_component:plastid(GO:0009536);;cellular_component:chloroplast stroma(GO:0009570)	-	15368.BRADI4G36060.1|-88.1|ENOG4111UAI|S|Senescence-inducible chloroplast stay-green protein	-	Q652K1|SGR_ORYSJ|-89.0|Protein STAY-GREEN, chloroplastic OS=Oryza sativa subsp. japonica GN=SGR PE=1 SV=1	XP_003576766.1|-86.1|PREDICTED: protein STAY-GREEN, chloroplastic-like [Brachypodium distachyon]
c210130_g2	cluster 2	1.57698	0.000589089	0.00676661	up	1.44923	0.00141043	0.0110456	up	-	-	-	-	biological_process:purine nucleotide biosynthetic process(GO:0006164);;biological_process:'de novo' IMP biosynthetic process(GO:0006189);;cellular_component:chloroplast(GO:0009507);;cellular_component:chloroplast(GO:0009507);;cellular_component:plastid(GO:0009536);;molecular_function:ligase activity(GO:0016874);;molecular_function:nucleotide binding(GO:0000166);;molecular_function:phosphoribosyla…	mus:103992229|-157.5|K01923|purC; phosphoribosylaminoimidazole-succinocarboxamide synthase [EC:6.3.2.6]|ko00230|Purine metabolism;;	4641.GSMUA_Achr7P19070_001|-158.8|COG0152|F|SAICAR synthetase	PF01259.16|SAICAR_synt|4.9e-75|SAICAR synthetase	P38025|PUR7_ARATH|-144.9|Phosphoribosylaminoimidazole-succinocarboxamide synthase, chloroplastic OS=Arabidopsis thaliana GN=PUR7 PE=2 SV=2	XP_020246987.1|-161.3|phosphoribosylaminoimidazole-succinocarboxamide synthase, chloroplastic-like [Asparagus officinalis]
c210286_g1	cluster 2	2.15224	0.000320937	0.00524487	up	1.76153	0.000179982	0.0054256	up	-	-	-	-	biological_process:DNA recombination(GO:0006310);;biological_process:cellular response to DNA damage stimulus(GO:0006974);;cellular_component:chloroplast(GO:0009507);;cellular_component:plastid(GO:0009536);;cellular_component:chloroplast stroma(GO:0009570);;molecular_function:nucleotide binding(GO:0000166);;molecular_function:DNA binding(GO:0003677);;molecular_function:ATP binding(GO:0005524)	mus:103975661|-183.4|K03553|recA; recombination protein RecA|ko03440|Homologous recombination;;	4641.GSMUA_Achr2P13090_001|-183.7|COG0468|L|Can catalyze the hydrolysis of ATP in the presence of single-stranded DNA, the ATP-dependent uptake of single-stranded DNA by duplex DNA, and the ATP-dependent hybridization of homologous single-stranded DNAs. It interacts with LexA causing its activation and leading to its autocatalytic cleavage (By similarity)	PF00154.19|RecA|2.4e-117|recA bacterial DNA recombination protein	Q39199|RECAC_ARATH|-169.7|DNA repair protein recA homolog 1, chloroplastic OS=Arabidopsis thaliana GN=RECA PE=2 SV=1	XP_020276181.1|-187.6|DNA repair protein recA homolog 1, chloroplastic isoform X1 [Asparagus officinalis]
c210325_g1	cluster 1	1.86535	0.00068593	0.00720481	up	1.99666	0.000194214	0.0054933	up	1.44405	0.00132236	0.0299606	up	cellular_component:cytoplasm(GO:0005737);;cellular_component:cytoplasm(GO:0005737);;cellular_component:chloroplast(GO:0009507);;cellular_component:plastid(GO:0009536);;cellular_component:chloroplast stroma(GO:0009570);;biological_process:cellular response to sulfate starvation(GO:0009970);;molecular_function:transferase activity(GO:0016740);;molecular_function:nucleotidyltransferase activity(GO:0…	vvi:100252345|-211.2|K13811|PAPSS; 3'-phosphoadenosine 5'-phosphosulfate synthase [EC:2.7.7.4 2.7.1.25]|ko00230|Purine metabolism;;ko00920|Sulfur metabolism;;ko00261|Monobactam biosynthesis;;ko00450|Selenocompound metabolism;;	29760.VIT_18s0001g14010.t01|-212.4|COG2046|P|Catalyzes the first intracellular reaction of sulfate assimilation, forming adenosine-5'-phosphosulfate (APS) from inorganic sulfate and ATP. Plays an important role in sulfate activation as a component of the biosynthesis pathway of sulfur- containing amino acids (By similarity)	PF01747.15|ATP-sulfurylase|5.5e-66|ATP-sulfurylase	Q43870|APS2_ARATH|-204.5|ATP sulfurylase 2 OS=Arabidopsis thaliana GN=APS2 PE=1 SV=1	XP_020247427.1|-216.2|ATP sulfurylase 2 [Asparagus officinalis]
c210413_g1	cluster 2	2.04332	2.30556e-05	0.00319519	up	2.06826	0.000237435	0.0058694	up	-	-	-	-	cellular_component:plastid(GO:0009536);;molecular_function:triose-phosphate:phosphate antiporter activity(GO:0009670);;molecular_function:phosphoenolpyruvate:phosphate antiporter activity(GO:0015121);;biological_process:phosphoenolpyruvate transport(GO:0015714);;cellular_component:membrane(GO:0016020);;cellular_component:integral component of membrane(GO:0016021);;cellular_component:chloroplast m…	-	4558.Sb02g020360.1|-152.5|ENOG410XP1S|S|solute carrier family 35 member	PF03151.14|TPT|4.4e-128|Triose-phosphate Transporter family	Q69VR7|PPT1_ORYSJ|-151.0|Phosphoenolpyruvate/phosphate translocator 1, chloroplastic OS=Oryza sativa subsp. japonica GN=PPT1 PE=2 SV=1	XP_020264831.1|-158.5|phosphoenolpyruvate/phosphate translocator 2, chloroplastic-like [Asparagus officinalis]
c210518_g1	cluster 6	-1.09607	0.00172667	0.0113161	down	-	-	-	-	-	-	-	-	cellular_component:plastid(GO:0009536);;molecular_function:hydrolase activity(GO:0016787);;molecular_function:6-phosphogluconolactonase activity(GO:0017057);;biological_process:pentose-phosphate shunt(GO:0006098);;cellular_component:chloroplast(GO:0009507);;cellular_component:chloroplast(GO:0009507)	pda:103722058|-107.0|K01057|PGLS, pgl, devB; 6-phosphogluconolactonase [EC:3.1.1.31]|ko01200|Carbon metabolism;;ko00030|Pentose phosphate pathway;;	4555.Si030554m|-97.4|COG0363|G|Catalyzes the reversible isomerization-deamination of glucosamine 6-phosphate (GlcN6P) to form fructose 6-phosphate (Fru6P) and ammonium ion (By similarity)	PF01182.18|Glucosamine_iso|7.3e-69|Glucosamine-6-phosphate isomerases/6-phosphogluconolactonase	Q69NG5|6PGL4_ORYSJ|-97.7|Probable 6-phosphogluconolactonase 4, chloroplastic OS=Oryza sativa subsp. japonica GN=Os09g0529100 PE=2 SV=2	XP_020263619.1|-112.6|probable 6-phosphogluconolactonase 4, chloroplastic [Asparagus officinalis]
c210802_g1	cluster 2	3.0142	0.000556742	0.00661827	up	2.80082	0.00046361	0.00711179	up	-	-	-	-	cellular_component:chloroplast(GO:0009507);;cellular_component:chloroplast(GO:0009507);;cellular_component:plastid(GO:0009536);;molecular_function:lyase activity(GO:0016829);;molecular_function:cystathionine beta-lyase activity(GO:0004121);;biological_process:cellular amino acid biosynthetic process(GO:0008652);;biological_process:methionine biosynthetic process(GO:0009086)	mus:103992615|-145.4|K01760|metC; cystathionine beta-lyase [EC:4.4.1.8]|ko01230|Biosynthesis of amino acids;;ko00270|Cysteine and methionine metabolism;;ko00450|Selenocompound metabolism;;	4641.GSMUA_Achr7P23210_001|-146.7|COG0626|E|cystathionine	PF01053.18|Cys_Met_Meta_PP|1e-127|Cys/Met metabolism PLP-dependent enzyme	P53780|METC_ARATH|-137.2|Cystathionine beta-lyase, chloroplastic OS=Arabidopsis thaliana GN=At3g57050 PE=1 SV=1	XP_020261874.1|-148.8|cystathionine beta-lyase, chloroplastic isoform X1 [Asparagus officinalis]
c210811_g2	cluster 1	-	-	-	-	-	-	-	-	1.07613	0.00380922	0.0434497	up	-	-	4641.GSMUA_AchrUn_randomP15720_001|-208.6|COG0402|F|deaminase	-	Q9LS72|PP261_ARATH|-103.0|Pentatricopeptide repeat-containing protein At3g29230 OS=Arabidopsis thaliana GN=PCMP-E27 PE=2 SV=1	XP_010929587.1|-214.3|PREDICTED: uncharacterized protein LOC105051024 [Elaeis guineensis]
c211198_g1	cluster 3	-2.04272	0.0100605	0.0325323	down	-3.43238	0.00774599	0.0285343	down	-	-	-	-	cellular_component:chloroplast(GO:0009507);;cellular_component:chloroplast(GO:0009507);;cellular_component:plastid(GO:0009536);;molecular_function:hydrolase activity(GO:0016787);;biological_process:lipid metabolic process(GO:0006629);;biological_process:fatty acid metabolic process(GO:0006631);;biological_process:fatty acid biosynthetic process(GO:0006633)	egu:105040257|-160.7|K10781|FATB; fatty acyl-ACP thioesterase B [EC:3.1.2.14 3.1.2.21]|ko00061|Fatty acid biosynthesis;;ko01212|Fatty acid metabolism;;	4641.GSMUA_Achr5P24910_001|-152.5|COG3884|I|acyl-ACP thioesterase	PF01643.15|Acyl-ACP_TE|1.3e-85|Acyl-ACP thioesterase	Q9SQI3|FATB_GOSHI|-149.9|Palmitoyl-acyl carrier protein thioesterase, chloroplastic OS=Gossypium hirsutum GN=FATB1 PE=1 SV=1	XP_020259241.1|-189.0|palmitoyl-acyl carrier protein thioesterase, chloroplastic-like [Asparagus officinalis]
c211330_g2	cluster 1	1.59258	0.000671926	0.00714658	up	1.5175	0.000653624	0.00803917	up	1.21803	0.00433396	0.0455903	up	biological_process:arginine biosynthetic process(GO:0006526);;biological_process:arginine biosynthetic process(GO:0006526);;biological_process:metabolic process(GO:0008152);;biological_process:cellular amino acid biosynthetic process(GO:0008652);;cellular_component:chloroplast(GO:0009507);;cellular_component:chloroplast(GO:0009507);;cellular_component:plastid(GO:0009536);;molecular_function:trans…	pda:103720013|-193.0|K00620|argJ; glutamate N-acetyltransferase / amino-acid N-acetyltransferase [EC:2.3.1.35 2.3.1.1]|ko01230|Biosynthesis of amino acids;;ko00220|Arginine biosynthesis;;ko01210|2-Oxocarboxylic acid metabolism;;	4641.GSMUA_Achr10P13560_001|-191.8|COG1364|E|Catalyzes two activities which are involved in the cyclic version of arginine biosynthesis the synthesis of N- acetylglutamate from glutamate and acetyl-CoA as the acetyl donor, and of ornithine by transacetylation between N(2)-acetylornithine and glutamate (By similarity)	PF01960.16|ArgJ|2.1e-139|ArgJ family	B9NAN0|ARGJ_POPTR|-186.9|Arginine biosynthesis bifunctional protein ArgJ, chloroplastic OS=Populus trichocarpa GN=POPTRDRAFT_746969 PE=3 SV=2	XP_020271401.1|-196.7|arginine biosynthesis bifunctional protein ArgJ, chloroplastic [Asparagus officinalis]
c211938_g2	cluster 1	1.72822	4.21135e-05	0.00343346	up	1.5166	0.000869003	0.00902588	up	-	-	-	-	-	egu:105042443|-55.7|K02968|RP-S20, rpsT; small subunit ribosomal protein S20|ko03010|Ribosome;;	4113.PGSC0003DMT400032285|-51.5|ENOG41129UT|J|ribosomal protein S20	-	-	XP_020273684.1|-65.6|30S ribosomal protein S20, chloroplastic [Asparagus officinalis]
c212013_g1	cluster 1	1.76402	0.000128858	0.00411969	up	1.79912	0.00015212	0.00515891	up	1.14686	0.00436052	0.0456386	up	molecular_function:peptidase activity(GO:0008233);;molecular_function:metallopeptidase activity(GO:0008237);;cellular_component:chloroplast(GO:0009507);;cellular_component:chloroplast thylakoid membrane(GO:0009535);;cellular_component:plastid(GO:0009536);;cellular_component:thylakoid(GO:0009579);;cellular_component:membrane(GO:0016020);;cellular_component:integral component of membrane(GO:0016021…	-	4081.Solyc02g079000.2.1|-10000.0|COG0465|O|Acts as a processive, ATP-dependent zinc metallopeptidase for both cytoplasmic and membrane proteins. Plays a role in the quality control of integral membrane proteins (By similarity)	-	Q9SAJ3|FTSHC_ARATH|-10000.0|ATP-dependent zinc metalloprotease FTSH 12, chloroplastic OS=Arabidopsis thaliana GN=FTSH12 PE=2 SV=2	XP_020256644.1|-10000.0|ATP-dependent zinc metalloprotease FTSH 12, chloroplastic [Asparagus officinalis]
c212072_g1	cluster 1	1.09675	0.00691962	0.025468	up	1.29109	0.000474935	0.00716877	up	-	-	-	-	cellular_component:chloroplast(GO:0009507);;cellular_component:chloroplast(GO:0009507);;cellular_component:plastid(GO:0009536);;molecular_function:RNA binding(GO:0003723);;biological_process:mRNA processing(GO:0006397);;biological_process:tRNA processing(GO:0008033)	-	4577.GRMZM5G836994_P01|-127.1|ENOG4111YUJ|A|Usually encoded in the trnK tRNA gene intron. Probably assists in splicing its own and other chloroplast group II introns (By similarity)	PF01824.16|MatK_N|2.3e-78|MatK/TrnK amino terminal region	Q8GVB5|MATK_LEUAE|-181.0|Maturase K OS=Leucojum aestivum GN=matK PE=3 SV=1	YP_009317100.1|-212.5|maturase K (chloroplast) [Allium sativum]
c212138_g1	cluster 6	-	-	-	-	-	-	-	-	-	-	-	-	cellular_component:chloroplast(GO:0009507);;cellular_component:chloroplast(GO:0009507);;cellular_component:plastid(GO:0009536)	-	4533.OB01G10520.1|-187.2|ENOG410ZHAF|S|protein EXECUTER 1, chloroplastic-like	-	Q657X6|EXEC2_ORYSJ|-185.5|Protein EXECUTER 2, chloroplastic OS=Oryza sativa subsp. japonica GN=EX2 PE=2 SV=1	XP_020097437.1|-228.8|protein EXECUTER 2, chloroplastic isoform X2 [Ananas comosus]
c212140_g4	cluster 1	3.4882	4.15462e-05	0.00343346	up	3.43498	2.87907e-05	0.00386228	up	2.61495	0.00430821	0.0455244	up	cellular_component:membrane(GO:0016020);;cellular_component:integral component of membrane(GO:0016021);;cellular_component:chloroplast membrane(GO:0031969);;biological_process:transport(GO:0006810);;cellular_component:chloroplast(GO:0009507);;cellular_component:plastid(GO:0009536)	-	4641.GSMUA_Achr1P13330_001|-140.0|ENOG4111Y30|S|crt homolog 1-like	-	Q058P6|CLT1_ARATH|-124.9|Protein CLT1, chloroplastic OS=Arabidopsis thaliana GN=CLT1 PE=2 SV=1	XP_010938545.1|-142.6|PREDICTED: protein CLT1, chloroplastic isoform X1 [Elaeis guineensis]
c212603_g1	cluster 2	1.90255	0.000841893	0.00789648	up	1.39552	0.00286909	0.015907	up	-	-	-	-	cellular_component:chloroplast(GO:0009507);;cellular_component:plastid(GO:0009536);;biological_process:chlorophyll biosynthetic process(GO:0015995);;biological_process:chlorophyll biosynthetic process(GO:0015995);;molecular_function:isomerase activity(GO:0016853);;molecular_function:glutamate-1-semialdehyde 2,1-aminomutase activity(GO:0042286);;biological_process:porphyrin-containing compound bio…	mus:103987255|-213.8|K01845|hemL; glutamate-1-semialdehyde 2,1-aminomutase [EC:5.4.3.8]|ko00860|Porphyrin and chlorophyll metabolism;;	4641.GSMUA_Achr6P07940_001|-215.1|COG0001|H|Glutamate-1-semialdehyde aminotransferase	PF00202.19|Aminotran_3|3.7e-72|Aminotransferase class-III	Q6YZE2|GSA_ORYSJ|-215.2|Glutamate-1-semialdehyde 2,1-aminomutase, chloroplastic OS=Oryza sativa subsp. japonica GN=GSA PE=2 SV=1	XP_020261122.1|-224.7|glutamate-1-semialdehyde 2,1-aminomutase, chloroplastic-like [Asparagus officinalis]
c212923_g2	cluster 1	-	-	-	-	1.30288	0.00620571	0.0247791	up	-	-	-	-	biological_process:response to toxic substance(GO:0009636);;molecular_function:transferase activity(GO:0016740);;molecular_function:glutathione transferase activity(GO:0004364);;cellular_component:cytoplasm(GO:0005737);;cellular_component:cytosol(GO:0005829)	-	15368.BRADI2G37480.1|-91.0|ENOG4110FKA|O|Chloride intracellular channel	-	Q9FRL8|DHAR2_ARATH|-75.3|Glutathione S-transferase DHAR2 OS=Arabidopsis thaliana GN=DHAR2 PE=1 SV=1	XP_020274447.1|-93.7|glutathione S-transferase DHAR2-like [Asparagus officinalis]
c212973_g1	cluster 1	1.23351	0.000528911	0.0064403	up	1.11371	0.000240782	0.00589218	up	-	-	-	-	molecular_function:polyribonucleotide nucleotidyltransferase activity(GO:0004654);;biological_process:rRNA processing(GO:0006364);;biological_process:mRNA processing(GO:0006397);;biological_process:tRNA processing(GO:0008033);;cellular_component:chloroplast(GO:0009507);;cellular_component:chloroplast(GO:0009507);;cellular_component:plastid(GO:0009536);;molecular_function:transferase activity(GO:0…	egu:105035219|-10000.0|K00962|pnp, PNPT1; polyribonucleotide nucleotidyltransferase [EC:2.7.7.8]|ko00230|Purine metabolism;;ko00240|Pyrimidine metabolism;;ko03018|RNA degradation;;	4533.OB07G13300.1|-10000.0|COG1185|J|Involved in mRNA degradation. Hydrolyzes single-stranded polyribonucleotides processively in the 3'- to 5'-direction (By similarity)	-	Q69LE7|PNP1_ORYSJ|-10000.0|Probable polyribonucleotide nucleotidyltransferase 1, chloroplastic OS=Oryza sativa subsp. japonica GN=PNP1 PE=2 SV=1	XP_020273374.1|-10000.0|probable polyribonucleotide nucleotidyltransferase 1, chloroplastic [Asparagus officinalis]
c213244_g1	cluster 2	1.78552	0.000871391	0.00800819	up	1.20892	0.00127371	0.0106207	up	-	-	-	-	cellular_component:chloroplast(GO:0009507);;cellular_component:chloroplast(GO:0009507);;cellular_component:plastid(GO:0009536);;molecular_function:hydrolase activity(GO:0016787);;molecular_function:metal ion binding(GO:0046872);;molecular_function:aminopeptidase activity(GO:0004177);;biological_process:proteolysis(GO:0006508);;molecular_function:peptidase activity(GO:0008233)	-	4641.GSMUA_Achr2P02490_001|-146.0|COG0024|J|Removes the N-terminal methionine from nascent proteins (By similarity)	-	Q9FV52|MAP1B_ARATH|-135.2|Methionine aminopeptidase 1B, chloroplastic OS=Arabidopsis thaliana GN=MAP1B PE=2 SV=2	ONK74936.1|-160.7|uncharacterized protein A4U43_C03F11630 [Asparagus officinalis]
c213266_g1	cluster 3	-1.25591	1.88252e-05	0.00319519	down	-1.33361	0.00157648	0.0115862	down	-1.48576	1.47193e-05	0.0139355	down	molecular_function:oxidoreductase activity(GO:0016491);;molecular_function:phytochromobilin:ferredoxin oxidoreductase activity(GO:0050619);;biological_process:oxidation-reduction process(GO:0055114);;cellular_component:chloroplast(GO:0009507);;cellular_component:chloroplast(GO:0009507);;cellular_component:plastid(GO:0009536)	egu:105047124|-111.8|K08101|HY2; phytochromobilin:ferredoxin oxidoreductase [EC:1.3.7.4]|ko00860|Porphyrin and chlorophyll metabolism;;	29760.VIT_06s0009g03770.t01|-110.5|ENOG41102EM|H|Catalyzes the two-electron reduction of the C2 and C3(1) diene system of 15,16-dihydrobiliverdin (By similarity)	PF05996.10|Fe_bilin_red|1.1e-62|Ferredoxin-dependent bilin reductase	Q9SR43|PFBS_ARATH|-91.3|Phytochromobilin:ferredoxin oxidoreductase, chloroplastic OS=Arabidopsis thaliana GN=HY2 PE=2 SV=1	XP_010924238.1|-113.0|PREDICTED: phytochromobilin:ferredoxin oxidoreductase, chloroplastic isoform X2 [Elaeis guineensis]
c213389_g1	cluster 2	1.72516	0.000820692	0.0078165	up	1.71739	0.00121755	0.010424	up	-	-	-	-	cellular_component:membrane(GO:0016020);;cellular_component:integral component of membrane(GO:0016021);;cellular_component:chloroplast membrane(GO:0031969);;biological_process:transport(GO:0006810);;cellular_component:chloroplast(GO:0009507);;cellular_component:plastid(GO:0009536)	-	4641.GSMUA_Achr9P03630_001|-137.9|ENOG410ZRF1|S|Solute carrier family 25	-	O65023|EAAC_ARATH|-125.5|Probable envelope ADP,ATP carrier protein, chloroplastic OS=Arabidopsis thaliana GN=EAAC PE=2 SV=2	XP_008785354.1|-137.9|PREDICTED: thylakoid ADP,ATP carrier protein, chloroplastic [Phoenix dactylifera]
c213433_g2	cluster 1	1.67371	0.000359438	0.00549719	up	1.67713	0.00137053	0.010911	up	1.44852	0.00270982	0.0383761	up	cellular_component:pore complex(GO:0046930);;cellular_component:plastid outer membrane(GO:0009527);;cellular_component:plastid(GO:0009536);;cellular_component:chloroplast outer membrane(GO:0009707);;molecular_function:porin activity(GO:0015288);;molecular_function:porin activity(GO:0015288);;cellular_component:membrane(GO:0016020);;cellular_component:integral component of membrane(GO:0016021);;mo…	-	4641.GSMUA_Achr4P33140_001|-78.0|ENOG410YICA|U|High-conductance voltage-dependent solute channel with a slight selectivity for cations transporting triosephosphates, dicarboxylic acids, ATP, inorganic phosphate (Pi), sugars, and positively or negatively charged amino acids (By similarity)	-	Q1H5C9|OP24A_ARATH|-70.6|Outer envelope pore protein 24A, chloroplastic OS=Arabidopsis thaliana GN=OEP24A PE=1 SV=1	XP_020258018.1|-96.5|outer envelope pore protein 24, chloroplastic-like [Asparagus officinalis]
c213446_g1	cluster 1	1.24694	0.000251717	0.00482092	up	2.13051	0.00011248	0.00485536	up	2.14625	0.000630185	0.0248672	up	cellular_component:membrane(GO:0016020);;cellular_component:integral component of membrane(GO:0016021);;cellular_component:chloroplast membrane(GO:0031969);;biological_process:multicellular organism development(GO:0007275);;cellular_component:chloroplast(GO:0009507);;cellular_component:plastid(GO:0009536)	-	29760.VIT_08s0007g01250.t01|-147.6|ENOG410YE28|S|Domain of unknown function (DUF3411)	PF11891.6|RETICULATA-like|2.8e-63|Protein RETICULATA-related	Q9FGP9|RER1_ARATH|-140.2|Protein RETICULATA-RELATED 1, chloroplastic OS=Arabidopsis thaliana GN=RER1 PE=1 SV=1	XP_020252461.1|-153.0|protein RETICULATA, chloroplastic-like [Asparagus officinalis]
c213469_g1	cluster 3	-	-	-	-	-1.96281	0.00756409	0.0281329	down	-	-	-	-	cellular_component:chloroplast(GO:0009507);;cellular_component:chloroplast thylakoid membrane(GO:0009535);;cellular_component:plastid(GO:0009536);;cellular_component:chloroplast stroma(GO:0009570);;cellular_component:thylakoid(GO:0009579);;cellular_component:membrane(GO:0016020);;molecular_function:hydrolase activity(GO:0016787);;biological_process:proteolysis(GO:0006508);;molecular_function:pept…	-	4641.GSMUA_Achr9P14660_001|-233.8|COG0616|OU|Signal peptide peptidase, SppA	-	Q9C9C0|SPPA1_ARATH|-214.9|Serine protease SPPA, chloroplastic OS=Arabidopsis thaliana GN=SPPA PE=2 SV=1	XP_020264430.1|-254.6|serine protease SPPA, chloroplastic [Asparagus officinalis]
c213578_g2	cluster 3	-1.12645	0.00282067	0.0147611	down	-	-	-	-	-1.15062	0.00368592	0.042796	down	cellular_component:plastid(GO:0009536);;molecular_function:oxidoreductase activity(GO:0016491);;biological_process:oxidation-reduction process(GO:0055114);;molecular_function:aldehyde dehydrogenase (NAD) activity(GO:0004029);;cellular_component:chloroplast(GO:0009507);;cellular_component:chloroplast(GO:0009507)	mus:103971266|-196.8|K00128|ALDH; aldehyde dehydrogenase (NAD+) [EC:1.2.1.3]|ko00561|Glycerolipid metabolism;;ko00071|Fatty acid degradation;;ko00380|Tryptophan metabolism;;ko00310|Lysine degradation;;ko00040|Pentose and glucuronate interconversions;;ko00410|beta-Alanine metabolism;;ko00340|Histidine metabolism;;ko00620|Pyruvate metabolism;;ko00330|Arginine and proline metabolism;;ko00903|Limonen…	4641.GSMUA_Achr11P11870_001|-198.1|COG1012|C|Dehydrogenase	PF00171.20|Aldedh|5.6e-87|Aldehyde dehydrogenase family	Q8W033|AL3I1_ARATH|-172.1|Aldehyde dehydrogenase family 3 member I1, chloroplastic OS=Arabidopsis thaliana GN=ALDH3I1 PE=1 SV=2	XP_020245592.1|-204.3|aldehyde dehydrogenase family 3 member H1-like [Asparagus officinalis]
c213633_g1	cluster 1	2.10171	0.000671174	0.00714658	up	2.11953	0.000289201	0.00624692	up	3.05593	0.00342942	0.041743	up	cellular_component:chloroplast(GO:0009507);;cellular_component:plastid(GO:0009536);;molecular_function:oxidoreductase activity(GO:0016491);;molecular_function:metal ion binding(GO:0046872);;biological_process:oxidation-reduction process(GO:0055114);;molecular_function:ferroxidase activity(GO:0004322);;biological_process:cellular iron ion homeostasis(GO:0006879);;cellular_component:chloroplast(GO:…	-	3847.GLYMA11G35610.1|-90.4|ENOG410Y5ZV|P|Stores iron in a soluble, non-toxic, readily available form. Important for iron homeostasis (By similarity)	-	Q948P6|FRI3_SOYBN|-91.6|Ferritin-3, chloroplastic OS=Glycine max PE=2 SV=1	ABJ99593.1|-97.5|ferritin [Lycoris aurea]
c213638_g3	cluster 4	-	-	-	-	-	-	-	-	-	-	-	-	cellular_component:chloroplast(GO:0009507);;cellular_component:chloroplast(GO:0009507);;cellular_component:plastid(GO:0009536);;molecular_function:hydrolase activity(GO:0016787);;molecular_function:metal ion binding(GO:0046872);;molecular_function:nuclease activity(GO:0004518);;molecular_function:endonuclease activity(GO:0004519);;biological_process:tRNA processing(GO:0008033)	egu:105050004|-133.4|K00784|rnz; ribonuclease Z [EC:3.1.26.11]|ko03013|RNA transport;;	4641.GSMUA_Achr3P03960_001|-130.5|COG1234|S|Zinc phosphodiesterase, which displays some tRNA 3'- processing endonuclease activity. Probably involved in tRNA maturation, by removing a 3'-trailer from precursor tRNA (By similarity)	-	Q8L633|RNZ2_ARATH|-118.1|tRNase Z TRZ2, chloroplastic OS=Arabidopsis thaliana GN=TRZ2 PE=2 SV=1	XP_020264223.1|-144.1|ribonuclease Z, chloroplastic-like isoform X1 [Asparagus officinalis]
c213665_g3	cluster 3	-1.35717	0.00205897	0.0124267	down	-1.52683	0.00162547	0.0117511	down	-1.50775	0.000393634	0.0224783	down	-	-	-	-	-	-
c213930_g2	cluster 1	1.2044	0.00107617	0.00887048	up	1.16573	0.00107243	0.00985284	up	-	-	-	-	biological_process:cellular amino acid biosynthetic process(GO:0008652);;biological_process:aromatic amino acid family biosynthetic process(GO:0009073);;cellular_component:chloroplast(GO:0009507);;cellular_component:chloroplast(GO:0009507);;cellular_component:plastid(GO:0009536);;molecular_function:isomerase activity(GO:0016853);;biological_process:tryptophan biosynthetic process(GO:0000162);;bio…	egu:105037252|-81.6|K01817|trpF; phosphoribosylanthranilate isomerase [EC:5.3.1.24]|ko01230|Biosynthesis of amino acids;;ko00400|Phenylalanine, tyrosine and tryptophan biosynthesis;;	4641.GSMUA_Achr10P14760_001|-80.1|COG0135|E|N-(5'-phosphoribosyl)anthranilate isomerase	-	Q42440|PAI1_ARATH|-73.6|N-(5'-phosphoribosyl)anthranilate isomerase 1, chloroplastic OS=Arabidopsis thaliana GN=PAI1 PE=2 SV=1	XP_020250673.1|-87.4|N-(5'-phosphoribosyl)anthranilate isomerase 1, chloroplastic-like isoform X1 [Asparagus officinalis]
c213970_g2	cluster 2	1.01432	0.000106744	0.00397257	up	-	-	-	-	-	-	-	-	cellular_component:plastid(GO:0009536);;cellular_component:chloroplast stroma(GO:0009570);;molecular_function:transferase activity(GO:0016740);;molecular_function:lyase activity(GO:0016829);;molecular_function:cysteine desulfurase activity(GO:0031071);;molecular_function:selenocysteine lyase activity(GO:0009000);;cellular_component:chloroplast(GO:0009507);;cellular_component:chloroplast(GO:000950…	pda:103716678|-170.6|K11717|sufS; cysteine desulfurase / selenocysteine lyase [EC:2.8.1.7 4.4.1.16]|ko00450|Selenocompound metabolism;;	4641.GSMUA_Achr11P19870_001|-167.8|COG0520|E|cysteine desulfurase	PF00266.17|Aminotran_5|9.9e-122|Aminotransferase class-V	Q93WX6|CNIF1_ARATH|-160.0|Cysteine desulfurase 1, chloroplastic OS=Arabidopsis thaliana GN=NFS2 PE=1 SV=1	XP_008802998.1|-169.8|PREDICTED: cysteine desulfurase 1, chloroplastic [Phoenix dactylifera]
c214047_g1	cluster 2	1.63887	0.000206039	0.00451332	up	1.48158	0.00420083	0.0196971	up	-	-	-	-	cellular_component:plastid inner membrane(GO:0009528);;cellular_component:plastid(GO:0009536);;cellular_component:chloroplast inner membrane(GO:0009706);;biological_process:protein transport(GO:0015031);;cellular_component:membrane(GO:0016020);;molecular_function:oxidoreductase activity(GO:0016491);;biological_process:oxidation-reduction process(GO:0055114);;molecular_function:calmodulin binding(…	-	4641.GSMUA_Achr2P18620_001|-78.3|COG1028|S|Dehydrogenase reductase	-	Q6RVV4|TIC32_PEA|-73.7|Short-chain dehydrogenase TIC 32, chloroplastic OS=Pisum sativum GN=TIC32 PE=1 SV=1	XP_020250265.1|-81.8|LOW QUALITY PROTEIN: short-chain dehydrogenase TIC 32, chloroplastic-like [Asparagus officinalis]
c214047_g3	cluster 2	1.07844	0.00224567	0.0130266	up	1.29306	0.00172135	0.0120857	up	-	-	-	-	-	-	-	-	-	ONK55216.1|-49.2|uncharacterized protein A4U43_UnF6320 [Asparagus officinalis]
c214091_g1	cluster 4	1.31027	0.00240471	0.0135139	up	-	-	-	-	-	-	-	-	biological_process:cellular amino acid biosynthetic process(GO:0008652);;biological_process:threonine biosynthetic process(GO:0009088);;biological_process:threonine biosynthetic process(GO:0009088);;cellular_component:chloroplast(GO:0009507);;cellular_component:chloroplast(GO:0009507);;cellular_component:plastid(GO:0009536);;molecular_function:lyase activity(GO:0016829);;molecular_function:cataly…	egu:105046819|-222.7|K01733|thrC; threonine synthase [EC:4.2.3.1]|ko00260|Glycine, serine and threonine metabolism;;ko01230|Biosynthesis of amino acids;;ko00750|Vitamin B6 metabolism;;	39947.LOC_Os05g47640.1|-223.0|COG0498|E|threonine synthase	-	Q9MT28|THRC_SOLTU|-215.3|Threonine synthase, chloroplastic OS=Solanum tuberosum PE=2 SV=1	XP_020265426.1|-222.7|LOW QUALITY PROTEIN: threonine synthase, chloroplastic-like [Asparagus officinalis]
c214176_g1	cluster 1	1.87132	0.000483254	0.00623064	up	1.68648	5.16795e-06	0.00309092	up	1.77881	0.000861379	0.0266032	up	cellular_component:plastid(GO:0009536);;molecular_function:oxidoreductase activity(GO:0016491);;biological_process:oxidation-reduction process(GO:0055114);;molecular_function:phosphoglycerate dehydrogenase activity(GO:0004617);;cellular_component:chloroplast(GO:0009507);;cellular_component:chloroplast(GO:0009507)	gra:105783122|-84.4|K00058|serA, PHGDH; D-3-phosphoglycerate dehydrogenase [EC:1.1.1.95]|ko00260|Glycine, serine and threonine metabolism;;ko01200|Carbon metabolism;;ko01230|Biosynthesis of amino acids;;	3694.POPTR_0009s09950.1|-83.1|COG0111|E|Dehydrogenase	-	O49485|SERA1_ARATH|-83.0|D-3-phosphoglycerate dehydrogenase 1, chloroplastic OS=Arabidopsis thaliana GN=PGDH1 PE=1 SV=1	XP_020265568.1|-85.3|D-3-phosphoglycerate dehydrogenase 1, chloroplastic isoform X1 [Asparagus officinalis]
c214176_g2	cluster 1	-	-	-	-	2.32728	0.0124578	0.0387947	up	-	-	-	-	cellular_component:plastid(GO:0009536);;molecular_function:oxidoreductase activity(GO:0016491);;biological_process:oxidation-reduction process(GO:0055114);;molecular_function:phosphoglycerate dehydrogenase activity(GO:0004617);;cellular_component:chloroplast(GO:0009507);;cellular_component:chloroplast(GO:0009507)	egu:105049537|-53.9|K00058|serA, PHGDH; D-3-phosphoglycerate dehydrogenase [EC:1.1.1.95]|ko00260|Glycine, serine and threonine metabolism;;ko01200|Carbon metabolism;;ko01230|Biosynthesis of amino acids;;	4577.GRMZM2G081886_P01|-55.1|COG0111|E|Dehydrogenase	-	O49485|SERA1_ARATH|-51.9|D-3-phosphoglycerate dehydrogenase 1, chloroplastic OS=Arabidopsis thaliana GN=PGDH1 PE=1 SV=1	ONK70308.1|-55.5|uncharacterized protein A4U43_C05F32390 [Asparagus officinalis]
c214176_g3	cluster 1	1.65927	0.0017848	0.0114969	up	1.98708	0.000870793	0.00902588	up	1.38715	0.000414372	0.0228221	up	cellular_component:plastid(GO:0009536);;molecular_function:oxidoreductase activity(GO:0016491);;biological_process:oxidation-reduction process(GO:0055114);;molecular_function:phosphoglycerate dehydrogenase activity(GO:0004617);;cellular_component:chloroplast(GO:0009507);;cellular_component:chloroplast(GO:0009507)	pmum:103335142|-112.2|K00058|serA, PHGDH; D-3-phosphoglycerate dehydrogenase [EC:1.1.1.95]|ko00260|Glycine, serine and threonine metabolism;;ko01200|Carbon metabolism;;ko01230|Biosynthesis of amino acids;;	3694.POPTR_0009s09950.1|-110.8|COG0111|E|Dehydrogenase	-	Q9LT69|SERA3_ARATH|-108.1|D-3-phosphoglycerate dehydrogenase 3, chloroplastic OS=Arabidopsis thaliana GN=PGDH3 PE=1 SV=1	XP_008236365.1|-111.4|PREDICTED: D-3-phosphoglycerate dehydrogenase 1, chloroplastic [Prunus mume]
c214194_g2	cluster 4	1.42783	0.000495735	0.00629036	up	1.10871	0.00246393	0.0146136	up	-	-	-	-	-	-	-	-	-	AHA12876.1|-48.7|ribosomal protein L16 (plastid) [Maranta leuconeura]
c214371_g7	cluster 1	1.26725	8.76123e-05	0.0037838	up	1.47571	0.000266663	0.0061072	up	1.29607	0.00479443	0.0472346	up	cellular_component:chloroplast(GO:0009507);;cellular_component:chloroplast(GO:0009507);;cellular_component:plastid(GO:0009536);;molecular_function:transferase activity(GO:0016740);;biological_process:tetrahydrofolate biosynthetic process(GO:0046654);;biological_process:folic acid biosynthetic process(GO:0046656);;molecular_function:4-amino-4-deoxychorismate synthase activity(GO:0046820);;molecula…	pvu:PHAVU_007G094100g|-200.3|K13950|pabAB; para-aminobenzoate synthetase [EC:2.6.1.85]|ko00790|Folate biosynthesis;;	29760.VIT_13s0019g04170.t01|-199.2|COG0147|E|synthase (Component I)	PF00425.16|Chorismate_bind|2.5e-85|chorismate binding enzyme	Q5Z856|ADCS_ORYSJ|-187.4|Probable aminodeoxychorismate synthase, chloroplastic OS=Oryza sativa subsp. japonica GN=ADCS PE=2 SV=1	XP_020090500.1|-203.3|probable aminodeoxychorismate synthase, chloroplastic [Ananas comosus]
c214371_g9	cluster 1	1.46986	0.00177842	0.0114855	up	1.93072	0.000402004	0.00681111	up	-	-	-	-	biological_process:glutamine metabolic process(GO:0006541);;cellular_component:chloroplast(GO:0009507);;cellular_component:plastid stroma(GO:0009532);;cellular_component:plastid(GO:0009536);;cellular_component:chloroplast stroma(GO:0009570);;molecular_function:transferase activity(GO:0016740);;molecular_function:transferase activity, transferring glycosyl groups(GO:0016757);;molecular_function:me…	pda:103702738|-208.0|K00764|purF, PPAT; amidophosphoribosyltransferase [EC:2.4.2.14]|ko00230|Purine metabolism;;ko00250|Alanine, aspartate and glutamate metabolism;;	4641.GSMUA_Achr4P16330_001|-193.2|COG0034|F|glutamine phosphoribosylpyrophosphate amidotransferase	-	Q9SI61|ASE1_ARATH|-181.8|Amidophosphoribosyltransferase 1, chloroplastic OS=Arabidopsis thaliana GN=ASE1 PE=2 SV=1	XP_020263115.1|-210.6|LOW QUALITY PROTEIN: amidophosphoribosyltransferase, chloroplastic-like [Asparagus officinalis]
c214603_g3	cluster 2	1.43539	0.000875125	0.00802613	up	-	-	-	-	-	-	-	-	-	-	-	-	-	-
c214614_g5	cluster 4	-	-	-	-	-	-	-	-	-	-	-	-	-	-	-	-	-	-
c214750_g1	cluster 1	1.12607	0.000121403	0.00407638	up	-	-	-	-	-	-	-	-	molecular_function:aspartate-tRNA ligase activity(GO:0004815);;molecular_function:ATP binding(GO:0005524);;cellular_component:mitochondrion(GO:0005739);;cellular_component:mitochondrion(GO:0005739);;biological_process:translation(GO:0006412);;cellular_component:chloroplast(GO:0009507);;cellular_component:chloroplast(GO:0009507);;cellular_component:plastid(GO:0009536);;molecular_function:ligase ac…	pda:103710776|-279.6|K01876|DARS, aspS; aspartyl-tRNA synthetase [EC:6.1.1.12]|ko00970|Aminoacyl-tRNA biosynthesis;;	29760.VIT_03s0088g00500.t01|-271.6|COG0173|J|aspartyl-trna synthetase	PF00152.18|tRNA-synt_2|1.5e-106|tRNA synthetases class II (D, K and N)	F4JJT9|SYDM_ARATH|-263.2|Aspartate--tRNA ligase, chloroplastic/mitochondrial OS=Arabidopsis thaliana GN=At4g33760 PE=2 SV=1	ONK62326.1|-290.5|uncharacterized protein A4U43_C07F2740 [Asparagus officinalis]
c215042_g1	cluster 4	2.0746	0.00396133	0.0179735	up	1.33804	0.0148958	0.0436053	up	-	-	-	-	biological_process:fatty acid biosynthetic process(GO:0006633);;biological_process:fatty acid biosynthetic process(GO:0006633);;cellular_component:chloroplast(GO:0009507);;cellular_component:chloroplast(GO:0009507);;cellular_component:plastid(GO:0009536);;cellular_component:plastid(GO:0009536);;molecular_function:oxidoreductase activity(GO:0016491);;biological_process:oxidation-reduction process(…	pop:POPTR_0010s06620g|-126.7|K00059|fabG; 3-oxoacyl-[acyl-carrier protein] reductase [EC:1.1.1.100]|ko00061|Fatty acid biosynthesis;;ko01040|Biosynthesis of unsaturated fatty acids;;ko01212|Fatty acid metabolism;;ko00780|Biotin metabolism;;	3694.POPTR_0010s06620.1|-127.9|COG1028|S|Dehydrogenase reductase	PF13561.4|adh_short_C2|3.1e-67|Enoyl-(Acyl carrier protein) reductase	P28643|FABG_CUPLA|-122.4|3-oxoacyl-[acyl-carrier-protein] reductase, chloroplastic OS=Cuphea lanceolata GN=CLKR27 PE=2 SV=1	XP_020242255.1|-128.3|3-oxoacyl-[acyl-carrier-protein] reductase 4-like [Asparagus officinalis]
c215168_g1	cluster 1	2.65458	7.47169e-05	0.00364148	up	2.36109	0.000163503	0.00524102	up	2.06019	0.000851539	0.0266032	up	biological_process:photosynthesis(GO:0015979);;molecular_function:oxidoreductase activity(GO:0016491);;molecular_function:metal ion binding(GO:0046872);;biological_process:oxidation-reduction process(GO:0055114);;cellular_component:chloroplast(GO:0009507);;cellular_component:chloroplast(GO:0009507);;cellular_component:plastid(GO:0009536)	sind:105162092|-103.6|K00510|HMOX1; heme oxygenase 1 [EC:1.14.14.18]|ko00860|Porphyrin and chlorophyll metabolism;;	4081.Solyc12g009470.1.1|-104.0|COG5398|P|Heme oxygenase	-	O48782|HMOX1_ARATH|-99.5|Heme oxygenase 1, chloroplastic OS=Arabidopsis thaliana GN=HO1 PE=1 SV=2	XP_020240824.1|-108.8|heme oxygenase 1, chloroplastic-like [Asparagus officinalis]
c215449_g1	cluster 3	-1.12223	0.00843952	0.028964	down	-1.78219	0.00858073	0.0303564	down	-	-	-	-	cellular_component:chloroplast(GO:0009507);;cellular_component:chloroplast(GO:0009507);;cellular_component:plastid(GO:0009536)	-	3694.POPTR_0007s10760.1|-71.0|ENOG4111TWY|S|(CBS) domain	-	O23193|CBSX1_ARATH|-67.3|CBS domain-containing protein CBSX1, chloroplastic OS=Arabidopsis thaliana GN=CBSX1 PE=1 SV=2	XP_020265584.1|-71.9|CBS domain-containing protein CBSX1, chloroplastic [Asparagus officinalis]
c215468_g1	cluster 1	3.10458	0.000629518	0.00695083	up	3.75354	0.000582692	0.00775422	up	3.43715	0.000990227	0.0277073	up	-	-	4558.Sb09g022230.1|-59.7|ENOG410YI8C|T|universal stress protein	-	-	XP_020274786.1|-66.0|universal stress protein PHOS32 [Asparagus officinalis]
c215598_g2	cluster 1	2.07078	0.000498382	0.00630177	up	1.68121	8.60843e-05	0.00443569	up	-	-	-	-	-	-	29760.VIT_10s0003g02710.t01|-53.4|ENOG4111T1X|S|cold acclimation	-	-	XP_020248053.1|-58.5|cold-regulated 413 inner membrane protein 1, chloroplastic-like isoform X2 [Asparagus officinalis]
c215659_g1	cluster 1	2.29526	0.000551042	0.00657785	up	2.27083	0.00063295	0.00797741	up	1.46454	0.00467971	0.0469235	up	molecular_function:L-phenylalanine:2-oxoglutarate aminotransferase activity(GO:0080130);;biological_process:cellular amino acid biosynthetic process(GO:0008652);;biological_process:L-phenylalanine biosynthetic process(GO:0009094);;biological_process:aromatic amino acid family biosynthetic process, prephenate pathway(GO:0009095);;cellular_component:chloroplast(GO:0009507);;cellular_component:chlor…	egu:105037948|-196.1|K15849|PAT, AAT; bifunctional aspartate aminotransferase and glutamate/aspartate-prephenate aminotransferase [EC:2.6.1.1 2.6.1.78 2.6.1.79]|ko00400|Phenylalanine, tyrosine and tryptophan biosynthesis;;ko00950|Isoquinoline alkaloid biosynthesis;;ko00350|Tyrosine metabolism;;ko01230|Biosynthesis of amino acids;;ko00960|Tropane, piperidine and pyridine alkaloid biosynthesis;;ko0…	29760.VIT_07s0031g00980.t01|-192.3|COG0436|E|aminotransferase	PF00155.19|Aminotran_1_2|1.4e-70|Aminotransferase class I and II	E9L7A5|PAT_PETHY|-191.1|Bifunctional aspartate aminotransferase and glutamate/aspartate-prephenate aminotransferase OS=Petunia hybrida PE=1 SV=1	XP_020263572.1|-198.0|bifunctional aspartate aminotransferase and glutamate/aspartate-prephenate aminotransferase isoform X1 [Asparagus officinalis]
c215827_g1	cluster 3	-1.19782	0.0025308	0.0138786	down	-1.00833	0.0020898	0.0133435	down	-	-	-	-	-	-	-	-	-	-
c215855_g2	cluster 1	1.22511	0.00422222	0.0186954	up	1.08304	0.00175464	0.0121794	up	-	-	-	-	molecular_function:ATP binding(GO:0005524);;cellular_component:mitochondrion(GO:0005739);;cellular_component:mitochondrion(GO:0005739);;cellular_component:chloroplast(GO:0009507);;cellular_component:chloroplast(GO:0009507);;cellular_component:plastid(GO:0009536);;molecular_function:ligase activity(GO:0016874);;molecular_function:nucleotide binding(GO:0000166);;molecular_function:aminoacyl-tRNA li…	pda:103696183|-193.3|K01881|PARS, proS; prolyl-tRNA synthetase [EC:6.1.1.15]|ko00970|Aminoacyl-tRNA biosynthesis;;	4641.GSMUA_Achr5P23600_001|-191.0|COG0442|J|Catalyzes the attachment of proline to tRNA(Pro) in a two-step reaction proline is first activated by ATP to form Pro- AMP and then transferred to the acceptor end of tRNA(Pro). As ProRS can inadvertently accommodate and process non-cognate amino acids such as alanine and cysteine, to avoid such errors it has two additional distinct editing activities a…	-	Q9FYR6|SYPM_ARATH|-184.0|Proline--tRNA ligase, chloroplastic/mitochondrial OS=Arabidopsis thaliana GN=OVA6 PE=2 SV=1	ONK65088.1|-197.7|uncharacterized protein A4U43_C07F33480 [Asparagus officinalis]
c215958_g1	cluster 1	1.3712	7.44522e-05	0.00364148	up	-	-	-	-	-	-	-	-	biological_process:transport(GO:0006810);;cellular_component:chloroplast(GO:0009507);;cellular_component:plastid inner membrane(GO:0009528);;cellular_component:plastid(GO:0009536);;cellular_component:chloroplast inner membrane(GO:0009706);;cellular_component:membrane(GO:0016020);;cellular_component:integral component of membrane(GO:0016021);;cellular_component:mitochondrion(GO:0005739);;cellular_…	-	4641.GSMUA_Achr6P05150_001|-152.8|ENOG410ZRF1|S|Solute carrier family 25	-	Q9SUV1|BRT1_ARATH|-126.4|Adenine nucleotide transporter BT1, chloroplastic/mitochondrial OS=Arabidopsis thaliana GN=BT1 PE=1 SV=1	XP_010925230.1|-154.9|PREDICTED: adenine nucleotide transporter BT1, chloroplastic/mitochondrial-like isoform X2 [Elaeis guineensis]
c215997_g3	cluster 4	-	-	-	-	-	-	-	-	-	-	-	-	-	mus:103978263|-60.1|K03526|gcpE, ispG; (E)-4-hydroxy-3-methylbut-2-enyl-diphosphate synthase [EC:1.17.7.1 1.17.7.3]|ko00900|Terpenoid backbone biosynthesis;;	4641.GSMUA_Achr1P08940_001|-61.3|COG0821|I|4-hydroxy-3-methylbut-2-en-1-yl diphosphate synthase activity	-	-	XP_009392271.1|-59.3|PREDICTED: 4-hydroxy-3-methylbut-2-en-1-yl diphosphate synthase (ferredoxin), chloroplastic [Musa acuminata subsp. malaccensis]
c216074_g3	cluster 1	1.49028	0.000372051	0.00557875	up	1.53641	0.000263581	0.00608142	up	-	-	-	-	biological_process:arginine biosynthetic process(GO:0006526);;biological_process:arginine biosynthetic process(GO:0006526);;biological_process:cellular amino acid biosynthetic process(GO:0008652);;cellular_component:chloroplast(GO:0009507);;cellular_component:chloroplast(GO:0009507);;cellular_component:plastid(GO:0009536);;molecular_function:ligase activity(GO:0016874);;molecular_function:nucleot…	csv:101215247|-204.7|K01940|argG, ASS1; argininosuccinate synthase [EC:6.3.4.5]|ko01230|Biosynthesis of amino acids;;ko00250|Alanine, aspartate and glutamate metabolism;;ko00220|Arginine biosynthesis;;	39947.LOC_Os12g13320.1|-202.6|COG0137|E|Citrulline--aspartate ligase	PF00764.17|Arginosuc_synth|6.2e-159|Arginosuccinate synthase	Q9SZX3|ASSY_ARATH|-199.0|Argininosuccinate synthase, chloroplastic OS=Arabidopsis thaliana GN=At4g24830 PE=1 SV=3	XP_020269167.1|-210.5|argininosuccinate synthase, chloroplastic-like isoform X1 [Asparagus officinalis]
c216120_g1	cluster 1	1.23244	0.000300115	0.00516093	up	1.2906	0.000108471	0.00476169	up	1.24463	0.000181147	0.0197638	up	cellular_component:plastid(GO:0009536);;biological_process:chloroplast organization(GO:0009658);;cellular_component:chloroplast(GO:0009507);;cellular_component:chloroplast(GO:0009507);;cellular_component:chloroplast(GO:0009507)	-	3694.POPTR_0008s14270.1|-70.7|ENOG4111FF7|S|repeat protein	-	Q9LS48|SG1_ARATH|-65.5|protein SLOW GREEN 1, chloroplastic OS=Arabidopsis thaliana GN=SG1 PE=1 SV=1	XP_020260159.1|-94.3|protein SLOW GREEN 1, chloroplastic [Asparagus officinalis]
c216191_g1	cluster 4	1.20174	0.00143713	0.0102079	up	-	-	-	-	-	-	-	-	-	-	29760.VIT_02s0033g00060.t01|-53.5|ENOG410YJYY|S|DnaJ domain protein	-	-	XP_020241613.1|-67.7|protein ACCUMULATION AND REPLICATION OF CHLOROPLASTS 6, chloroplastic [Asparagus officinalis]
c216280_g1	cluster 1	-	-	-	-	1.39248	0.00358294	0.0179774	up	-	-	-	-	cellular_component:plastid(GO:0009536);;biological_process:mRNA processing(GO:0006397);;cellular_component:chloroplast(GO:0009507);;cellular_component:chloroplast(GO:0009507)	-	4081.Solyc10g080220.1.1|-211.5|ENOG410Z7Z7|S|Pentatricopeptide repeat-containing protein	-	Q8LK93|PP145_ARATH|-120.4|Pentatricopeptide repeat-containing protein At2g02980, chloroplastic OS=Arabidopsis thaliana GN=PCMP-H26 PE=2 SV=2	XP_020253597.1|-253.4|pentatricopeptide repeat-containing protein At4g21065-like [Asparagus officinalis]
c216464_g1	cluster 1	-	-	-	-	1.33798	0.00170792	0.0120366	up	-	-	-	-	biological_process:unsaturated fatty acid biosynthetic process(GO:0006636);;cellular_component:chloroplast(GO:0009507);;cellular_component:plastid(GO:0009536);;cellular_component:membrane(GO:0016020);;molecular_function:oxidoreductase activity(GO:0016491);;cellular_component:chloroplast membrane(GO:0031969);;biological_process:oxidation-reduction process(GO:0055114);;biological_process:lipid meta…	-	15368.BRADI2G51430.1|-286.8|ENOG410XP0J|S|dymeclin	PF09742.7|Dymeclin|3.5e-151|Dyggve-Melchior-Clausen syndrome protein	P48620|FAD3C_SESIN|-196.7|Omega-3 fatty acid desaturase, chloroplastic OS=Sesamum indicum GN=FAD7 PE=2 SV=1	XP_020273399.1|-10000.0|dymeclin isoform X2 [Asparagus officinalis]
c216466_g1	cluster 4	1.50064	2.47627e-05	0.00319519	up	-	-	-	-	-	-	-	-	-	-	3694.POPTR_0010s21680.1|-88.7|COG0724|S|Rna-binding protein	-	-	XP_010067372.1|-87.3|PREDICTED: protein gar2 [Eucalyptus grandis]
c216568_g3	cluster 2	1.03566	0.00061246	0.00686344	up	-	-	-	-	-	-	-	-	biological_process:protoporphyrinogen IX biosynthetic process(GO:0006782);;biological_process:heme biosynthetic process(GO:0006783);;biological_process:metabolic process(GO:0008152);;cellular_component:chloroplast(GO:0009507);;cellular_component:chloroplast(GO:0009507);;cellular_component:plastid(GO:0009536);;biological_process:chlorophyll biosynthetic process(GO:0015995);;molecular_function:lyas…	mus:103997948|-188.9|K01698|hemB, ALAD; porphobilinogen synthase [EC:4.2.1.24]|ko00860|Porphyrin and chlorophyll metabolism;;	4641.GSMUA_Achr9P14680_001|-190.1|COG0113|H|delta-aminolevulinic acid dehydratase	PF00490.19|ALAD|2.8e-130|Delta-aminolevulinic acid dehydratase	Q5Z8V9|HEM2_ORYSJ|-184.5|Delta-aminolevulinic acid dehydratase, chloroplastic OS=Oryza sativa subsp. japonica GN=HEMB PE=2 SV=1	AKU75683.1|-189.9|delta-aminolevulinic acid dehydratase [Musa ABB Group]
c216606_g2	cluster 3	-	-	-	-	-1.79317	0.00684135	0.0263408	down	-	-	-	-	cellular_component:chloroplast(GO:0009507);;cellular_component:chloroplast(GO:0009507);;cellular_component:plastid(GO:0009536)	-	4641.GSMUA_Achr1P10190_001|-73.4|COG1485|S|AFG1 family ATPase	-	Q9LMM6|BPS1_ARATH|-65.0|Protein BPS1, chloroplastic OS=Arabidopsis thaliana GN=BPS1 PE=2 SV=1	XP_020241018.1|-91.6|LOW QUALITY PROTEIN: UPF0496 protein 4-like [Asparagus officinalis]
c216674_g1	cluster 2	2.02066	0.00577728	0.0226481	up	-	-	-	-	-	-	-	-	cellular_component:chloroplast stroma(GO:0009570);;cellular_component:thylakoid(GO:0009579);;biological_process:chlorophyll catabolic process(GO:0015996);;cellular_component:membrane(GO:0016020);;molecular_function:hydrolase activity(GO:0016787);;cellular_component:chloroplast(GO:0009507);;cellular_component:chloroplast thylakoid membrane(GO:0009535);;cellular_component:plastid(GO:0009536)	-	4641.GSMUA_AchrUn_randomP14790_001|-175.6|COG0596|S|Alpha beta hydrolase	-	Q9FFZ1|PPH_ARATH|-157.7|Pheophytinase, chloroplastic OS=Arabidopsis thaliana GN=PPH PE=1 SV=1	ONK78469.1|-190.1|uncharacterized protein A4U43_C02F19100 [Asparagus officinalis]
c216791_g1	cluster 3	-1.23615	0.000190064	0.00440798	down	-1.54085	0.00031391	0.00635057	down	-1.36152	0.000863263	0.0266032	down	cellular_component:plastid(GO:0009536);;molecular_function:hydrolase activity(GO:0016787);;molecular_function:metal ion binding(GO:0046872);;molecular_function:phosphoprotein phosphatase activity(GO:0004721);;molecular_function:phosphoprotein phosphatase activity(GO:0004721);;cellular_component:plastid stroma(GO:0009532)	-	4558.Sb02g019610.1|-171.8|COG0639|T|serine threonine-protein phosphatase	-	P48528|PPX2_ARATH|-167.9|Serine/threonine-protein phosphatase PP-X isozyme 2 OS=Arabidopsis thaliana GN=PPX2 PE=2 SV=2	XP_010928880.1|-170.4|PREDICTED: serine/threonine-protein phosphatase PP-X isozyme 2 [Elaeis guineensis]
c216877_g4	cluster 4	1.81988	0.00143352	0.0101984	up	1.21694	0.000931052	0.00926516	up	-	-	-	-	cellular_component:chromoplast(GO:0009509);;cellular_component:plastid(GO:0009536);;cellular_component:membrane(GO:0016020);;cellular_component:membrane(GO:0016020);;biological_process:carotenoid biosynthetic process(GO:0016117);;molecular_function:oxidoreductase activity(GO:0016491);;biological_process:oxidation-reduction process(GO:0055114);;cellular_component:chloroplast(GO:0009507);;cellular_…	egu:105056650|-110.1|K02293|PDS, crtP; 15-cis-phytoene desaturase [EC:1.3.5.5]|ko00906|Carotenoid biosynthesis;;	15368.BRADI1G72400.1|-106.7|COG3349|S|Desaturase	-	Q40406|CRTI_NARPS|-113.6|Phytoene dehydrogenase, chloroplastic/chromoplastic OS=Narcissus pseudonarcissus GN=PDS1 PE=1 SV=1	AEG47695.1|-124.2|phytoene desaturase, partial [Allium sativum]
c216967_g1	cluster 1	1.89132	0.00101241	0.00860485	up	2.21005	0.00061378	0.00790269	up	2.21024	0.00090349	0.0268931	up	molecular_function:hydrolase activity(GO:0016787);;molecular_function:carboxylic ester hydrolase activity(GO:0052689);;molecular_function:carboxylic ester hydrolase activity(GO:0052689)	-	3847.GLYMA07G33330.1|-72.1|COG0657|I|alpha beta hydrolase fold-3 domain protein	-	Q9FX92|CXE3_ARATH|-68.2|Probable carboxylesterase 3 OS=Arabidopsis thaliana GN=CXE3 PE=2 SV=1	XP_010943016.1|-79.7|PREDICTED: tuliposide A-converting enzyme 2, chloroplastic-like [Elaeis guineensis]
c217152_g2	cluster 4	1.34934	0.000872056	0.00800819	up	-	-	-	-	-	-	-	-	biological_process:multicellular organism development(GO:0007275);;cellular_component:amyloplast(GO:0009501);;cellular_component:amyloplast(GO:0009501);;cellular_component:chloroplast(GO:0009507);;cellular_component:chloroplast(GO:0009507);;cellular_component:chromoplast(GO:0009509);;cellular_component:etioplast(GO:0009513);;cellular_component:plastid(GO:0009536);;biological_process:cellular resp…	-	4641.GSMUA_Achr10P12460_001|-116.9|ENOG4111FTZ|S|NA	-	Q39089|PAC_ARATH|-100.5|Protein PALE CRESS, chloroplastic OS=Arabidopsis thaliana GN=PAC PE=2 SV=1	XP_020268360.1|-120.0|protein PALE CRESS, chloroplastic [Asparagus officinalis]
c217269_g1	cluster 3	-2.84018	0.00332755	0.0162138	down	-3.29693	0.00152133	0.0114217	down	-	-	-	-	-	-	-	-	-	-
c217278_g1	cluster 3	-1.74504	0.00847904	0.0290519	down	-1.49842	0.00935181	0.0320775	down	-	-	-	-	molecular_function:ATP binding(GO:0005524);;biological_process:lipid metabolic process(GO:0006629);;biological_process:fatty acid metabolic process(GO:0006631);;biological_process:fatty acid metabolic process(GO:0006631);;biological_process:fatty acid metabolic process(GO:0006631);;molecular_function:ligase activity(GO:0016874);;molecular_function:decanoate--CoA ligase activity(GO:0102391);;molec…	mus:103979689|-264.9|K01897|ACSL, fadD; long-chain acyl-CoA synthetase [EC:6.2.1.3]|ko00071|Fatty acid degradation;;ko00061|Fatty acid biosynthesis;;ko04146|Peroxisome;;ko01212|Fatty acid metabolism;;	4641.GSMUA_Achr3P32060_001|-266.2|COG1022|I|Amp-dependent synthetase and ligase	PF00501.26|AMP-binding|1.4e-101|AMP-binding enzyme	Q9T0A0|LACS4_ARATH|-237.9|Long chain acyl-CoA synthetase 4 OS=Arabidopsis thaliana GN=LACS4 PE=2 SV=1	XP_020265092.1|-268.4|long chain acyl-CoA synthetase 4-like [Asparagus officinalis]
c217460_g1	cluster 6	-1.77917	0.00198449	0.0121879	down	-1.12922	0.000183354	0.00543688	down	-	-	-	-	cellular_component:plastid(GO:0009536);;biological_process:response to abscisic acid(GO:0009737);;biological_process:circadian rhythm(GO:0007623);;cellular_component:chloroplast(GO:0009507);;cellular_component:chloroplast(GO:0009507)	egu:105044044|-147.2|K19366|SPG20; spartin|ko04144|Endocytosis;;	29760.VIT_03s0038g02280.t01|-138.1|ENOG410ZEPM|S|Spastic paraplegia 20 (Troyer syndrome)	-	O48832|ERD7_ARATH|-127.2|Protein EARLY-RESPONSIVE TO DEHYDRATION 7, chloroplastic OS=Arabidopsis thaliana GN=ERD7 PE=1 SV=1	XP_010920125.1|-146.4|PREDICTED: protein EARLY-RESPONSIVE TO DEHYDRATION 7, chloroplastic [Elaeis guineensis]
c217473_g1	cluster 3	-	-	-	-	-1.2718	0.0128964	0.03963	down	-	-	-	-	cellular_component:plastid(GO:0009536);;biological_process:vitamin E biosynthetic process(GO:0010189);;molecular_function:transferase activity(GO:0016740);;biological_process:methylation(GO:0032259);;molecular_function:tocopherol O-methyltransferase activity(GO:0050342);;molecular_function:methyltransferase activity(GO:0008168);;cellular_component:chloroplast(GO:0009507);;cellular_component:chlor…	pda:103716652|-77.0|K05928|E2.1.1.95; tocopherol O-methyltransferase [EC:2.1.1.95]|ko00130|Ubiquinone and other terpenoid-quinone biosynthesis;;	4513.MLOC_13082.1|-76.3|ENOG410XP5G|S|Methyltransferase	-	Q6ZIK0|GTOMC_ORYSJ|-73.7|Probable tocopherol O-methyltransferase, chloroplastic OS=Oryza sativa subsp. japonica GN=VTE4 PE=2 SV=1	XP_008802964.1|-76.3|PREDICTED: probable tocopherol O-methyltransferase, chloroplastic [Phoenix dactylifera]
c217699_g1	cluster 1	-	-	-	-	-	-	-	-	1.04996	0.000386798	0.0224009	up	-	-	29760.VIT_11s0103g00310.t01|-108.0|ENOG410YFMP|S|Protein of unknown function (DUF630)	PF04782.10|DUF632|2.4e-81|Protein of unknown function (DUF632)	-	XP_020267070.1|-137.1|uncharacterized protein LOC109842630 [Asparagus officinalis]
c217861_g4	cluster 3	-1.52065	0.000197896	0.00445962	down	-1.6239	0.000112962	0.00485536	down	-1.49044	0.00063578	0.0249758	down	cellular_component:chloroplast(GO:0009507);;cellular_component:chloroplast(GO:0009507);;cellular_component:plastid(GO:0009536);;molecular_function:nucleotide binding(GO:0000166);;molecular_function:ATP binding(GO:0005524);;cellular_component:chloroplast(GO:0009507)	-	29760.VIT_14s0108g01500.t01|-10000.0|COG0542|O|ATP-dependent CLP protease ATP-binding subunit	-	Q75GT3|CLPB2_ORYSJ|-10000.0|Chaperone protein ClpB2, chloroplastic OS=Oryza sativa subsp. japonica GN=CLPB2 PE=2 SV=1	ONK55352.1|-10000.0|uncharacterized protein A4U43_UnF4400 [Asparagus officinalis]
c217861_g5	cluster 1	-	-	-	-	-	-	-	-	1.28843	0.000902651	0.0268931	up	-	-	-	-	-	-
c217912_g1	cluster 1	1.11657	0.000434055	0.0059622	up	1.09933	0.000752712	0.00846675	up	-	-	-	-	biological_process:aromatic amino acid family biosynthetic process(GO:0009073);;biological_process:chorismate biosynthetic process(GO:0009423);;cellular_component:chloroplast(GO:0009507);;cellular_component:chloroplast(GO:0009507);;cellular_component:plastid(GO:0009536);;molecular_function:lyase activity(GO:0016829);;biological_process:shikimate biosynthetic process(GO:0033587);;molecular_functio…	atr:18446596|-179.9|K01735|aroB; 3-dehydroquinate synthase [EC:4.2.3.4]|ko01230|Biosynthesis of amino acids;;ko00400|Phenylalanine, tyrosine and tryptophan biosynthesis;;	4641.GSMUA_Achr7P17800_001|-178.4|COG0337|E|3-dehydroquinate synthase	PF01761.18|DHQ_synthase|8.9e-108|3-dehydroquinate synthase	U3KRF2|DHQS_ACTCH|-181.0|3-dehydroquinate synthase, chloroplastic OS=Actinidia chinensis GN=DHQS PE=1 SV=2	XP_020115312.1|-179.3|3-dehydroquinate synthase, chloroplastic [Ananas comosus]
c218402_g1	cluster 1	-	-	-	-	1.14066	0.000732272	0.00838499	up	-	-	-	-	cellular_component:chloroplast thylakoid membrane(GO:0009535);;cellular_component:plastid(GO:0009536);;cellular_component:thylakoid(GO:0009579);;cellular_component:membrane(GO:0016020);;cellular_component:integral component of membrane(GO:0016021);;molecular_function:hydrolase activity(GO:0016787);;biological_process:proteolysis(GO:0006508);;molecular_function:peptidase activity(GO:0008233);;cell…	egu:105060013|-91.8|K03100|lepB, TPP; signal peptidase I [EC:3.4.21.89]|ko03060|Protein export;;	4641.GSMUA_Achr9P26540_001|-86.3|COG0681|U|Signal peptidase i	-	O04348|TPP1_ARATH|-79.1|Thylakoidal processing peptidase 1, chloroplastic OS=Arabidopsis thaliana GN=TPP1 PE=2 SV=2	XP_020273885.1|-119.2|LOW QUALITY PROTEIN: thylakoidal processing peptidase 1, chloroplastic-like [Asparagus officinalis]
c218745_g2	cluster 3	-	-	-	-	-1.41697	0.0054322	0.0229666	down	-	-	-	-	cellular_component:chloroplast(GO:0009507);;cellular_component:chloroplast(GO:0009507);;cellular_component:plastid(GO:0009536);;molecular_function:lyase activity(GO:0016829);;molecular_function:ferrochelatase activity(GO:0004325);;biological_process:porphyrin-containing compound biosynthetic process(GO:0006779);;biological_process:heme biosynthetic process(GO:0006783)	mus:103992716|-175.2|K01772|hemH, FECH; protoporphyrin/coproporphyrin ferrochelatase [EC:4.99.1.1 4.99.1.9]|ko00860|Porphyrin and chlorophyll metabolism;;	4641.GSMUA_Achr7P24300_001|-176.5|COG0276|H|Catalyzes the ferrous insertion into protoporphyrin IX (By similarity)	PF00762.17|Ferrochelatase|1.4e-107|Ferrochelatase	P42044|HEMH_CUCSA|-171.5|Ferrochelatase-2, chloroplastic OS=Cucumis sativus GN=HEMH PE=2 SV=1	XP_020265188.1|-180.5|ferrochelatase-1, chloroplastic-like [Asparagus officinalis]
c218800_g1	cluster 2	3.6861	9.34126e-05	0.00381321	up	3.32862	5.29201e-05	0.00418091	up	-	-	-	-	molecular_function:transferase activity(GO:0016740);;molecular_function:transferase activity, transferring glycosyl groups(GO:0016757);;cellular_component:chloroplast membrane(GO:0031969);;molecular_function:1,2-diacylglycerol 3-beta-galactosyltransferase activity(GO:0046509);;cellular_component:chloroplast(GO:0009507);;cellular_component:plastid(GO:0009536);;cellular_component:membrane(GO:001602…	pda:103715894|-212.9|K03715|MGD; 1,2-diacylglycerol 3-beta-galactosyltransferase [EC:2.4.1.46]|ko00561|Glycerolipid metabolism;;	4558.Sb04g036240.1|-203.7|COG0707|M|Cell wall formation. Catalyzes the transfer of a GlcNAc subunit on undecaprenyl-pyrophosphoryl-MurNAc-pentapeptide (lipid intermediate I) to form undecaprenyl-pyrophosphoryl-MurNAc- (pentapeptide)GlcNAc (lipid intermediate II) (By similarity)	-	Q0DWQ1|MGDG3_ORYSJ|-202.8|Probable monogalactosyldiacylglycerol synthase 3, chloroplastic OS=Oryza sativa subsp. japonica GN=MGD3 PE=3 SV=2	XP_020265634.1|-229.3|probable monogalactosyldiacylglycerol synthase 3, chloroplastic [Asparagus officinalis]
c218833_g1	cluster 2	1.58104	0.00114239	0.00915482	up	1.3272	0.000264837	0.00608195	up	-	-	-	-	molecular_function:DNA topoisomerase type II (ATP-hydrolyzing) activity(GO:0003918);;molecular_function:ATP binding(GO:0005524);;cellular_component:mitochondrion(GO:0005739);;cellular_component:mitochondrion(GO:0005739);;cellular_component:chloroplast(GO:0009507);;cellular_component:chloroplast(GO:0009507);;cellular_component:plastid(GO:0009536);;molecular_function:isomerase activity(GO:0016853);…	-	4081.Solyc12g021230.1.1|-10000.0|COG0187|L|DNA gyrase negatively supercoils closed circular double- stranded DNA in an ATP-dependent manner and also catalyzes the interconversion of other topological isomers of double-stranded DNA rings, including catenanes and knotted rings (By similarity)	-	Q5YLB4|GYRB_NICBE|-10000.0|DNA gyrase subunit B, chloroplastic/mitochondrial OS=Nicotiana benthamiana GN=GYRB PE=2 SV=1	XP_020272974.1|-10000.0|DNA gyrase subunit B, chloroplastic/mitochondrial-like isoform X2 [Asparagus officinalis]
c218993_g2	cluster 4	1.90716	0.00017817	0.00435405	up	1.11066	0.000549229	0.00759079	up	-	-	-	-	cellular_component:chloroplast stroma(GO:0009570);;molecular_function:antioxidant activity(GO:0016209);;molecular_function:oxidoreductase activity(GO:0016491);;molecular_function:peroxiredoxin activity(GO:0051920);;biological_process:oxidation-reduction process(GO:0055114);;molecular_function:peroxidase activity(GO:0004601);;cellular_component:chloroplast(GO:0009507);;cellular_component:plastid(G…	-	4641.GSMUA_Achr10P11170_001|-71.3|COG0678|O|peroxiredoxin	-	Q7F8S5|PR2E2_ORYSJ|-68.9|Peroxiredoxin-2E-2, chloroplastic OS=Oryza sativa subsp. japonica GN=PRXIIE-2 PE=1 SV=1	XP_011101485.1|-70.5|peroxiredoxin-2E-1, chloroplastic [Sesamum indicum]
c219173_g1	cluster 1	1.03446	0.00203389	0.0123478	up	1.1478	0.00114785	0.0101423	up	-	-	-	-	-	-	-	-	-	-
c219423_g9	cluster 3	-1.66707	0.0104872	0.0334753	down	-3.21302	0.000485731	0.00723754	down	-1.86041	0.00198088	0.0337911	down	-	-	4641.GSMUA_Achr9P29680_001|-70.7|ENOG410YGQV|S|harpin-induced protein 1 domain containing protein, expressed	-	-	XP_020260410.1|-73.7|NDR1/HIN1-like protein 3 [Asparagus officinalis]
c219568_g5	cluster 2	1.38937	0.0152422	0.043172	up	-	-	-	-	-	-	-	-	biological_process:L-phenylalanine biosynthetic process(GO:0009094);;cellular_component:chloroplast(GO:0009507);;cellular_component:plastid(GO:0009536);;cellular_component:chloroplast stroma(GO:0009570);;molecular_function:lyase activity(GO:0016829);;molecular_function:arogenate dehydratase activity(GO:0047769);;biological_process:cellular amino acid biosynthetic process(GO:0008652);;biological_p…	vvi:100267022|-169.3|K05359|ADT, PDT; arogenate/prephenate dehydratase [EC:4.2.1.91 4.2.1.51]|ko01230|Biosynthesis of amino acids;;ko00400|Phenylalanine, tyrosine and tryptophan biosynthesis;;	29760.VIT_06s0061g01300.t01|-170.5|COG0077|E|Prephenate dehydratase	-	Q9ZUY3|AROD3_ARATH|-163.6|Arogenate dehydratase 3, chloroplastic OS=Arabidopsis thaliana GN=ADT3 PE=1 SV=1	XP_020673052.1|-174.4|arogenate dehydratase/prephenate dehydratase 6, chloroplastic-like [Dendrobium catenatum]
c219814_g4	cluster 1	1.22507	0.00234622	0.0132992	up	1.22012	0.00104373	0.0097319	up	1.29918	0.000886884	0.0267979	up	-	-	-	-	-	-
c220326_g7	cluster 2	2.36931	5.33197e-05	0.00351314	up	1.13385	0.0120109	0.0378767	up	-	-	-	-	biological_process:ion transport(GO:0006811);;biological_process:zinc II ion transport(GO:0006829);;cellular_component:membrane(GO:0016020);;cellular_component:integral component of membrane(GO:0016021);;cellular_component:plasma membrane(GO:0005886);;cellular_component:plasma membrane(GO:0005886);;biological_process:transport(GO:0006810)	-	39946.BGIOSGA023103-PA|-138.1|ENOG4111GP2|P|zinc transporter	PF02535.20|Zip|3.5e-75|ZIP Zinc transporter	Q5Z653|ZIP10_ORYSJ|-139.3|Zinc transporter 10 OS=Oryza sativa subsp. japonica GN=ZIP10 PE=3 SV=2	XP_008782533.1|-151.0|PREDICTED: zinc transporter 7-like [Phoenix dactylifera]
c220344_g3	cluster 3	-1.46129	0.000184629	0.00438033	down	-1.6409	0.000721	0.00832272	down	-1.37427	0.00307619	0.0401028	down	cellular_component:chloroplast(GO:0009507);;cellular_component:chloroplast(GO:0009507);;cellular_component:plastid(GO:0009536);;molecular_function:transferase activity(GO:0016740);;molecular_function:metal ion binding(GO:0046872);;biological_process:1-deoxy-D-xylulose 5-phosphate biosynthetic process(GO:0052865);;biological_process:isoprenoid biosynthetic process(GO:0008299);;molecular_function:1…	rcu:8277493|-212.9|K01662|dxs; 1-deoxy-D-xylulose-5-phosphate synthase [EC:2.2.1.7]|ko00730|Thiamine metabolism;;ko00900|Terpenoid backbone biosynthesis;;	4558.Sb02g005380.1|-209.1|COG1154|H|Catalyzes the acyloin condensation reaction between C atoms 2 and 3 of pyruvate and glyceraldehyde 3-phosphate to yield 1-deoxy-D-xylulose-5-phosphate (DXP) (By similarity)	PF13292.4|DXP_synthase_N|6.1e-112|1-deoxy-D-xylulose-5-phosphate synthase	Q6YU51|DXS2_ORYSJ|-207.9|Probable 1-deoxy-D-xylulose-5-phosphate synthase 2, chloroplastic OS=Oryza sativa subsp. japonica GN=Os07g0190000 PE=2 SV=1	ADD82535.1|-212.0|1-deoxyxylulose-5-phosphate synthase [Narcissus tazetta var. chinensis]
c220366_g1	cluster 3	-1.53687	0.000271072	0.00495208	down	-1.33143	0.00290754	0.0159961	down	-	-	-	-	cellular_component:ribosome(GO:0005840);;cellular_component:intracellular ribonucleoprotein complex(GO:0030529)	-	3694.POPTR_0015s04250.1|-137.4|ENOG410XQGZ|S|guanine nucleotidebinding protein	-	P49026|GBLP_TOBAC|-136.5|Guanine nucleotide-binding protein subunit beta-like protein OS=Nicotiana tabacum GN=ARCA PE=2 SV=1	XP_020267306.1|-150.0|LOW QUALITY PROTEIN: guanine nucleotide-binding protein subunit beta-like protein [Asparagus officinalis]
c220383_g1	cluster 4	1.30645	0.00224468	0.0130266	up	1.00068	0.00566235	0.0234748	up	-	-	-	-	-	-	-	-	-	-
c220419_g1	cluster 1	-	-	-	-	1.37407	0.000935687	0.00928824	up	-	-	-	-	cellular_component:chloroplast(GO:0009507);;cellular_component:chloroplast(GO:0009507);;cellular_component:plastid(GO:0009536)	-	4641.GSMUA_Achr2P12160_001|-121.8|ENOG410XSXA|S|Shikimate kinase	-	O82290|SKL2_ARATH|-117.2|Probable inactive shikimate kinase like 2, chloroplastic OS=Arabidopsis thaliana GN=SKL2 PE=2 SV=2	XP_020260827.1|-132.8|probable inactive shikimate kinase like 2, chloroplastic [Asparagus officinalis]
c220452_g2	cluster 1	-	-	-	-	-	-	-	-	1.03109	0.000340545	0.0220538	up	molecular_function:protein binding(GO:0005515);;cellular_component:chloroplast(GO:0009507);;cellular_component:plastid outer membrane(GO:0009527);;cellular_component:plastid(GO:0009536);;cellular_component:chloroplast stroma(GO:0009570);;cellular_component:chloroplast outer membrane(GO:0009707);;cellular_component:chloroplast outer membrane(GO:0009707);;biological_process:chloroplast fission(GO:0…	-	4641.GSMUA_Achr2P03680_001|-178.0|COG4642|S|whole genome shotgun sequence	-	Q6F6B5|ARC3_ARATH|-73.4|Protein ACCUMULATION AND REPLICATION OF CHLOROPLASTS 3 OS=Arabidopsis thaliana GN=ARC3 PE=1 SV=2	XP_020250299.1|-188.9|protein ACCUMULATION AND REPLICATION OF CHLOROPLASTS 3 isoform X1 [Asparagus officinalis]
c220513_g4	cluster 1	-	-	-	-	1.34248	0.00127341	0.0106207	up	1.24953	0.00464589	0.0468796	up	biological_process:fatty acid biosynthetic process(GO:0006633);;biological_process:fatty acid biosynthetic process(GO:0006633);;cellular_component:chloroplast(GO:0009507);;cellular_component:chloroplast(GO:0009507);;cellular_component:plastid(GO:0009536);;cellular_component:plastid(GO:0009536);;molecular_function:oxidoreductase activity(GO:0016491);;biological_process:oxidation-reduction process(…	pop:POPTR_0010s06620g|-124.5|K00059|fabG; 3-oxoacyl-[acyl-carrier protein] reductase [EC:1.1.1.100]|ko00061|Fatty acid biosynthesis;;ko01040|Biosynthesis of unsaturated fatty acids;;ko01212|Fatty acid metabolism;;ko00780|Biotin metabolism;;	3694.POPTR_0010s06620.1|-125.7|COG1028|S|Dehydrogenase reductase	PF13561.4|adh_short_C2|3.4e-67|Enoyl-(Acyl carrier protein) reductase	P28643|FABG_CUPLA|-122.6|3-oxoacyl-[acyl-carrier-protein] reductase, chloroplastic OS=Cuphea lanceolata GN=CLKR27 PE=2 SV=1	XP_020242255.1|-124.7|3-oxoacyl-[acyl-carrier-protein] reductase 4-like [Asparagus officinalis]
c220604_g2	cluster 1	-	-	-	-	1.17496	0.00306799	0.0164721	up	-	-	-	-	cellular_component:thylakoid(GO:0009579);;biological_process:chlorophyll catabolic process(GO:0015996);;biological_process:chlorophyll catabolic process(GO:0015996);;cellular_component:membrane(GO:0016020);;molecular_function:oxidoreductase activity(GO:0016491);;molecular_function:metal ion binding(GO:0046872);;molecular_function:iron-sulfur cluster binding(GO:0051536);;molecular_function:2 iron,…	sita:101766370|-234.1|K13071|PAO, ACD1; pheophorbide a oxygenase [EC:1.14.15.17]|ko00860|Porphyrin and chlorophyll metabolism;;	4555.Si035147m|-235.3|COG4638|P|rieske 2fe-2S domain-containing protein	-	Q9FYC2|PAO_ARATH|-212.9|Pheophorbide a oxygenase, chloroplastic OS=Arabidopsis thaliana GN=PAO PE=1 SV=1	XP_020263386.1|-237.4|pheophorbide a oxygenase, chloroplastic [Asparagus officinalis]
c220633_g1	cluster 1	1.33491	0.000167152	0.00425561	up	1.27167	0.000201222	0.00555598	up	-	-	-	-	molecular_function:transferase activity(GO:0016740);;molecular_function:lipoate synthase activity(GO:0016992);;molecular_function:metal ion binding(GO:0046872);;molecular_function:iron-sulfur cluster binding(GO:0051536);;molecular_function:4 iron, 4 sulfur cluster binding(GO:0051539);;cellular_component:chloroplast(GO:0009507);;cellular_component:chloroplast(GO:0009507);;cellular_component:plasti…	egu:105033851|-172.8|K03644|lipA; lipoyl synthase [EC:2.8.1.8]|ko00785|Lipoic acid metabolism;;	4641.GSMUA_Achr6P31420_001|-159.2|COG0320|H|Catalyzes the radical-mediated insertion of two sulfur atoms into the C-6 and C-8 positions of the octanoyl moiety bound to the lipoyl domains of lipoate-dependent enzymes, thereby converting the octanoylated domains into lipoylated derivatives (By similarity)	-	Q8LEE8|LISC_ARATH|-153.5|Lipoyl synthase, chloroplastic OS=Arabidopsis thaliana GN=LIP1P PE=2 SV=2	XP_020256216.1|-179.2|lipoyl synthase 1, chloroplastic [Asparagus officinalis]
c220729_g1	cluster 2	1.48671	0.000102584	0.00393121	up	1.33616	2.70161e-05	0.00385486	up	-	-	-	-	biological_process:transport(GO:0006810);;cellular_component:chloroplast(GO:0009507);;cellular_component:plastid(GO:0009536);;biological_process:protein transport(GO:0015031);;cellular_component:membrane(GO:0016020);;cellular_component:chloroplast membrane(GO:0031969);;molecular_function:nucleotide binding(GO:0000166);;molecular_function:ATP binding(GO:0005524);;biological_process:transport(GO:00…	pda:103701417|-10000.0|K03070|secA; preprotein translocase subunit SecA|ko03060|Protein export;;	29760.VIT_18s0001g01860.t01|-10000.0|COG0653|U|Part of the Sec protein translocase complex. Interacts with the SecYEG preprotein conducting channel. Has a central role in coupling the hydrolysis of ATP to the transfer of proteins into and across the cell membrane, serving	PF07517.12|SecA_DEAD|3.6e-116|SecA DEAD-like domain	D8WUA4|SECA2_ARATH|-10000.0|Protein translocase subunit SECA2, chloroplastic OS=Arabidopsis thaliana GN=SECA2 PE=2 SV=1	ONK65367.1|-10000.0|uncharacterized protein A4U43_C07F36380 [Asparagus officinalis]
c220943_g1	cluster 1	-	-	-	-	1.12598	0.00389781	0.0188504	up	1.19705	0.000250517	0.0210771	up	biological_process:defense response(GO:0006952);;molecular_function:lyase activity(GO:0016829);;molecular_function:metal ion binding(GO:0046872)	pda:103720937|-260.3|K04121|E4.2.3.19; ent-kaurene synthase [EC:4.2.3.19]|ko00904|Diterpenoid biosynthesis;;	4533.OB04G31880.1|-162.8|-|-|-	PF03936.14|Terpene_synth_C|1.6e-68|Terpene synthase family, metal binding domain	Q0JA81|KSL2_ORYSJ|-177.7|Ent-kaurene synthase-like 2 OS=Oryza sativa subsp. japonica GN=KSL2 PE=2 SV=2	XP_020277320.1|-273.6|ent-kaur-16-ene synthase, chloroplastic isoform X3 [Asparagus officinalis]
c221190_g9	cluster 1	-	-	-	-	1.31142	0.000147814	0.00509747	up	-	-	-	-	-	-	3694.POPTR_0001s24810.1|-82.0|ENOG4111J4U|S|PGR5-like protein	-	-	XP_010920572.1|-91.8|PREDICTED: uncharacterized protein LOC105044391 isoform X1 [Elaeis guineensis]
c221311_g1	cluster 4	-	-	-	-	-	-	-	-	-1.1332	0.00227485	0.0357302	down	cellular_component:mitochondrion(GO:0005739);;cellular_component:mitochondrion(GO:0005739);;biological_process:purine nucleotide biosynthetic process(GO:0006164);;biological_process:'de novo' IMP biosynthetic process(GO:0006189);;biological_process:glutamine metabolic process(GO:0006541);;cellular_component:chloroplast(GO:0009507);;cellular_component:chloroplast(GO:0009507);;cellular_component:pl…	bna:106430171|-10000.0|K01952|purL, PFAS; phosphoribosylformylglycinamidine synthase [EC:6.3.5.3]|ko00230|Purine metabolism;;	3711.Bra015924.1-P|-10000.0|COG0047|F|phosphoribosylformylglycinamidine synthase	PF13507.4|GATase_5|3.1e-106|CobB/CobQ-like glutamine amidotransferase domain	Q9M8D3|PUR4_ARATH|-10000.0|Probable phosphoribosylformylglycinamidine synthase, chloroplastic/mitochondrial OS=Arabidopsis thaliana GN=At1g74260 PE=2 SV=3	XP_006390444.1|-10000.0|hypothetical protein EUTSA_v10018011mg [Eutrema salsugineum]
c221470_g1	cluster 1	1.00086	7.90128e-05	0.0036699	up	1.16263	3.81173e-05	0.00395273	up	-	-	-	-	cellular_component:integral component of membrane(GO:0016021);;cellular_component:chloroplast membrane(GO:0031969);;cellular_component:chloroplast(GO:0009507);;cellular_component:plastid(GO:0009536);;cellular_component:membrane(GO:0016020)	-	29760.VIT_19s0027g00220.t01|-164.9|ENOG410XU74|S|Chromosome 16 open reading frame 58	PF04884.12|DUF647|5.9e-71|Vitamin B6 photo-protection and homoeostasis	Q7X6P3|RUS1_ARATH|-155.7|Protein root UVB sensitive 1, chloroplastic OS=Arabidopsis thaliana GN=RUS1 PE=1 SV=1	XP_020261733.1|-179.9|protein root UVB sensitive 1, chloroplastic isoform X2 [Asparagus officinalis]
c221618_g1	cluster 2	1.52137	0.00260816	0.0141311	up	1.16696	0.0113532	0.0364908	up	-	-	-	-	cellular_component:chloroplast(GO:0009507);;cellular_component:plastid(GO:0009536);;molecular_function:nucleotide binding(GO:0000166);;molecular_function:ATP binding(GO:0005524);;cellular_component:chloroplast(GO:0009507)	-	4641.GSMUA_Achr6P23780_001|-10000.0|COG0542|O|ATP-dependent CLP protease ATP-binding subunit	-	Q7XL03|CLPD2_ORYSJ|-10000.0|Chaperone protein ClpD2, chloroplastic OS=Oryza sativa subsp. japonica GN=CLPD2 PE=2 SV=2	XP_010942299.1|-10000.0|PREDICTED: chaperone protein ClpD2, chloroplastic [Elaeis guineensis]
c221680_g2	cluster 1	1.36914	0.00229484	0.0131618	up	1.23213	0.000237282	0.0058694	up	1.04089	0.00243149	0.0365613	up	-	-	3694.POPTR_0009s14840.1|-73.0|ENOG410Y4GI|S|NA	-	-	XP_020246097.1|-79.4|uncharacterized protein LOC109824010 [Asparagus officinalis]
c221931_g6	cluster 2	1.92739	0.00067874	0.00716113	up	1.65605	0.00124648	0.0105594	up	-	-	-	-	biological_process:ion transport(GO:0006811);;biological_process:zinc II ion transport(GO:0006829);;cellular_component:membrane(GO:0016020);;cellular_component:integral component of membrane(GO:0016021);;cellular_component:plasma membrane(GO:0005886);;cellular_component:plasma membrane(GO:0005886);;biological_process:transport(GO:0006810)	-	39947.LOC_Os05g07210.1|-96.7|ENOG4111GP2|P|zinc transporter	-	Q6L8F9|ZIP6_ORYSJ|-97.8|Zinc transporter 6 OS=Oryza sativa subsp. japonica GN=ZIP6 PE=2 SV=1	XP_019431986.1|-95.2|PREDICTED: zinc transporter 6, chloroplastic-like [Lupinus angustifolius]
c222162_g2	cluster 1	1.12395	0.00010566	0.00394849	up	1.19971	0.000676387	0.00815965	up	1.10954	0.00120964	0.029405	up	cellular_component:chloroplast(GO:0009507);;cellular_component:plastid(GO:0009536);;molecular_function:oxidoreductase activity(GO:0016491);;molecular_function:monodehydroascorbate reductase (NADH) activity(GO:0016656);;biological_process:oxidation-reduction process(GO:0055114);;cellular_component:mitochondrion(GO:0005739);;cellular_component:mitochondrion(GO:0005739);;cellular_component:chloropla…	egu:105059480|-212.7|K08232|E1.6.5.4; monodehydroascorbate reductase (NADH) [EC:1.6.5.4]|ko00053|Ascorbate and aldarate metabolism;;	4533.OB08G13140.1|-210.4|COG0446|S|pyridine nucleotide-disulfide oxidoreductase	-	P92947|MDAR5_ARATH|-203.5|Monodehydroascorbate reductase 5, mitochondrial OS=Arabidopsis thaliana GN=MDAR5 PE=1 SV=3	XP_020241045.1|-235.9|monodehydroascorbate reductase 5, mitochondrial isoform X1 [Asparagus officinalis]
c222185_g1	cluster 3	-1.20113	0.00186918	0.0117823	down	-	-	-	-	-	-	-	-	-	-	-	-	-	-
c222447_g1	cluster 5	-	-	-	-	-	-	-	-	1.08706	0.00520718	0.0486998	up	biological_process:porphyrin-containing compound biosynthetic process(GO:0006779);;biological_process:protoporphyrinogen IX biosynthetic process(GO:0006782);;biological_process:heme biosynthetic process(GO:0006783);;cellular_component:chloroplast(GO:0009507);;cellular_component:chloroplast(GO:0009507);;cellular_component:plastid(GO:0009536);;biological_process:chlorophyll biosynthetic process(GO:…	mus:103971589|-234.5|K00231|PPOX, hemY; protoporphyrinogen/coproporphyrinogen III oxidase [EC:1.3.3.4 1.3.3.15]|ko00860|Porphyrin and chlorophyll metabolism;;	4641.GSMUA_Achr11P15900_001|-235.8|COG1232|H|protoporphyrinogen oxidase	PF01593.22|Amino_oxidase|3.9e-87|Flavin containing amine oxidoreductase	P55826|PPOC_ARATH|-232.2|Protoporphyrinogen oxidase 1, chloroplastic OS=Arabidopsis thaliana GN=PPOX1 PE=1 SV=1	XP_009383920.1|-233.7|PREDICTED: protoporphyrinogen oxidase, chloroplastic [Musa acuminata subsp. malaccensis]
c222662_g3	cluster 2	1.20273	0.000396864	0.00570642	up	1.53146	0.00240422	0.0143916	up	-	-	-	-	cellular_component:chloroplast(GO:0009507);;cellular_component:plastid(GO:0009536);;cellular_component:chloroplast stroma(GO:0009570);;molecular_function:transferase activity(GO:0016740);;molecular_function:metal ion binding(GO:0046872);;biological_process:1-deoxy-D-xylulose 5-phosphate biosynthetic process(GO:0052865);;biological_process:isoprenoid biosynthetic process(GO:0008299);;molecular_fun…	egu:105057845|-10000.0|K01662|dxs; 1-deoxy-D-xylulose-5-phosphate synthase [EC:2.2.1.7]|ko00730|Thiamine metabolism;;ko00900|Terpenoid backbone biosynthesis;;	3694.POPTR_0010s01910.1|-10000.0|COG1154|H|Catalyzes the acyloin condensation reaction between C atoms 2 and 3 of pyruvate and glyceraldehyde 3-phosphate to yield 1-deoxy-D-xylulose-5-phosphate (DXP) (By similarity)	PF13292.4|DXP_synthase_N|1e-112|1-deoxy-D-xylulose-5-phosphate synthase	O22567|DXS1_ORYSJ|-10000.0|1-deoxy-D-xylulose-5-phosphate synthase 1, chloroplastic OS=Oryza sativa subsp. japonica GN=CLA1 PE=2 SV=2	XP_020086556.1|-10000.0|probable 1-deoxy-D-xylulose-5-phosphate synthase, chloroplastic [Ananas comosus]
c222871_g8	cluster 1	1.53427	0.000177333	0.00434898	up	1.66523	9.23085e-06	0.00336618	up	1.39554	0.00147909	0.0310219	up	cellular_component:plastid(GO:0009536);;cellular_component:thylakoid(GO:0009579);;cellular_component:membrane(GO:0016020);;cellular_component:integral component of membrane(GO:0016021);;molecular_function:oxidoreductase activity(GO:0016491);;molecular_function:L-ascorbate peroxidase activity(GO:0016688);;biological_process:hydrogen peroxide catabolic process(GO:0042744);;molecular_function:metal …	tcc:TCM_035150|-150.0|K00434|E1.11.1.11; L-ascorbate peroxidase [EC:1.11.1.11]|ko00480|Glutathione metabolism;;ko00053|Ascorbate and aldarate metabolism;;	3847.GLYMA04G42720.1|-151.1|COG0376|P|Bifunctional enzyme with both catalase and broad- spectrum peroxidase activity (By similarity)	-	Q42593|APXT_ARATH|-145.5|L-ascorbate peroxidase T, chloroplastic OS=Arabidopsis thaliana GN=APXT PE=2 SV=2	XP_020253130.1|-153.7|LOW QUALITY PROTEIN: probable L-ascorbate peroxidase 6, chloroplastic [Asparagus officinalis]
c222883_g1	cluster 1	1.27569	0.0003073	0.00520138	up	1.2427	0.00616652	0.0246833	up	1.18628	0.000550368	0.0241801	up	biological_process:fatty acid biosynthetic process(GO:0006633);;biological_process:multicellular organism development(GO:0007275);;cellular_component:chloroplast(GO:0009507);;cellular_component:plastid(GO:0009536);;cellular_component:chloroplast stroma(GO:0009570);;biological_process:cold acclimation(GO:0009631);;biological_process:embryo development ending in seed dormancy(GO:0009793);;molecular…	adu:107496158|-228.9|K09458|fabF; 3-oxoacyl-[acyl-carrier-protein] synthase II [EC:2.3.1.179]|ko00061|Fatty acid biosynthesis;;ko01212|Fatty acid metabolism;;ko00780|Biotin metabolism;;	29760.VIT_09s0002g00790.t01|-236.2|COG0304|I|Catalyzes the condensation reaction of fatty acid synthesis by the addition to an acyl acceptor of two carbons from malonyl-ACP (By similarity)	PF00109.24|ketoacyl-synt|3.9e-61|Beta-ketoacyl synthase, N-terminal domain	Q9C9P4|KASC2_ARATH|-215.2|3-oxoacyl-[acyl-carrier-protein] synthase II, chloroplastic OS=Arabidopsis thaliana GN=KAS2 PE=1 SV=1	XP_020256976.1|-238.4|3-oxoacyl-[acyl-carrier-protein] synthase II, chloroplastic-like isoform X1 [Asparagus officinalis]
c222989_g12	cluster 1	2.40466	0.000103993	0.0039478	up	1.85109	0.000280326	0.00619255	up	-	-	-	-	cellular_component:chloroplast(GO:0009507);;cellular_component:plastid(GO:0009536);;molecular_function:rRNA binding(GO:0019843);;cellular_component:intracellular ribonucleoprotein complex(GO:0030529);;molecular_function:RNA binding(GO:0003723);;cellular_component:ribosome(GO:0005840);;cellular_component:chloroplast(GO:0009507)	egu:105052661|-75.4|K02895|RP-L24, MRPL24, rplX; large subunit ribosomal protein L24|ko03010|Ribosome;;	4641.GSMUA_Achr8P33170_001|-76.0|COG0198|J|One of the proteins that surrounds the polypeptide exit tunnel on the outside of the subunit (By similarity)	-	P92959|RK24_ARATH|-70.4|50S ribosomal protein L24, chloroplastic OS=Arabidopsis thaliana GN=RPL24 PE=2 SV=2	XP_020276097.1|-86.9|50S ribosomal protein L24, chloroplastic-like [Asparagus officinalis]
c223036_g8	cluster 1	1.02154	0.000100691	0.00391584	up	1.23288	0.000269368	0.0061316	up	1.39023	0.00505321	0.0481569	up	cellular_component:membrane(GO:0016020);;cellular_component:integral component of membrane(GO:0016021);;cellular_component:chloroplast membrane(GO:0031969);;biological_process:multicellular organism development(GO:0007275);;cellular_component:chloroplast(GO:0009507);;cellular_component:plastid(GO:0009536)	-	3702.AT3G08640.1|-85.4|ENOG4111GA1|S|Domain of unknown function (DUF3411)	-	Q9C9Z2|RER3_ARATH|-86.6|Protein RETICULATA-RELATED 3, chloroplastic OS=Arabidopsis thaliana GN=RER3 PE=1 SV=1	OAY65431.1|-86.7|Protein RETICULATA-RELATED 3, chloroplastic [Ananas comosus]
c223119_g1	cluster 3	-	-	-	-	-1.94627	0.0174035	0.0484753	down	-	-	-	-	molecular_function:ATP binding(GO:0005524);;biological_process:glycolytic process(GO:0006096);;biological_process:glycolytic process(GO:0006096);;biological_process:metabolic process(GO:0008152);;cellular_component:chloroplast(GO:0009507);;cellular_component:chloroplast(GO:0009507);;cellular_component:plastid(GO:0009536);;molecular_function:kinase activity(GO:0016301);;biological_process:phosphor…	egu:105041727|-237.3|K00850|pfkA, PFK; 6-phosphofructokinase 1 [EC:2.7.1.11]|ko03018|RNA degradation;;ko00052|Galactose metabolism;;ko01200|Carbon metabolism;;ko01230|Biosynthesis of amino acids;;ko00030|Pentose phosphate pathway;;ko00051|Fructose and mannose metabolism;;ko00010|Glycolysis / Gluconeogenesis;;	4641.GSMUA_Achr7P11550_001|-234.7|COG0205|G|phosphohexokinase	PF00365.18|PFK|1e-62|Phosphofructokinase	Q8VYN6|PFKA5_ARATH|-203.2|ATP-dependent 6-phosphofructokinase 5, chloroplastic OS=Arabidopsis thaliana GN=PFK5 PE=1 SV=1	XP_010917037.1|-236.5|PREDICTED: ATP-dependent 6-phosphofructokinase 5, chloroplastic [Elaeis guineensis]
c223264_g2	cluster 4	1.0818	0.00302686	0.015409	up	-	-	-	-	-	-	-	-	cellular_component:plastid(GO:0009536);;cellular_component:chloroplast inner membrane(GO:0009706);;cellular_component:membrane(GO:0016020);;cellular_component:integral component of membrane(GO:0016021);;molecular_function:protein binding(GO:0005515);;cellular_component:chloroplast(GO:0009507);;cellular_component:plastid inner membrane(GO:0009528)	-	4555.Si021247m|-196.1|ENOG410YAIP|S|plastid division protein CDP1, chloroplastic-like	-	Q8VY16|CDP1_ARATH|-181.6|Plastid division protein CDP1, chloroplastic OS=Arabidopsis thaliana GN=CDP1 PE=1 SV=2	XP_020272231.1|-254.1|plastid division protein CDP1, chloroplastic [Asparagus officinalis]
c223284_g1	cluster 1	1.85132	0.00184044	0.011689	up	1.99235	0.000107062	0.0047495	up	1.66019	0.000959189	0.0274421	up	-	-	3694.POPTR_0012s04390.1|-73.4|ENOG410YNCK|S|zinc finger	-	-	XP_020253376.1|-97.6|zinc finger protein VAR3, chloroplastic [Asparagus officinalis]
c223494_g1	cluster 1	1.44486	0.000918771	0.00820087	up	1.72246	0.00077957	0.00859965	up	1.31432	0.00397599	0.0443086	up	cellular_component:chloroplast stroma(GO:0009570);;molecular_function:oxidoreductase activity(GO:0016491);;biological_process:response to arsenic-containing substance(GO:0046685);;biological_process:oxidation-reduction process(GO:0055114);;molecular_function:dihydrolipoyl dehydrogenase activity(GO:0004148);;cellular_component:chloroplast(GO:0009507);;cellular_component:plastid(GO:0009536)	egu:105039925|-245.0|K00382|DLD, lpd, pdhD; dihydrolipoamide dehydrogenase [EC:1.8.1.4]|ko00260|Glycine, serine and threonine metabolism;;ko01200|Carbon metabolism;;ko00630|Glyoxylate and dicarboxylate metabolism;;ko00620|Pyruvate metabolism;;ko00020|Citrate cycle (TCA cycle);;ko00280|Valine, leucine and isoleucine degradation;;ko00640|Propanoate metabolism;;ko00010|Glycolysis / Gluconeogenesis;;	39946.BGIOSGA003432-PA|-244.6|COG1249|C|dihydrolipoyl dehydrogenase	PF07992.12|Pyr_redox_2|4.6e-61|Pyridine nucleotide-disulphide oxidoreductase	A8MS68|PLPD1_ARATH|-236.9|Dihydrolipoyl dehydrogenase 1, chloroplastic OS=Arabidopsis thaliana GN=LPD1 PE=2 SV=1	XP_020244122.1|-248.5|dihydrolipoyl dehydrogenase 2, chloroplastic-like [Asparagus officinalis]
c223511_g2	cluster 3	-	-	-	-	-1.21718	0.00427599	0.0198779	down	-1.44203	0.00124612	0.0296574	down	biological_process:transport(GO:0006810);;cellular_component:chloroplast(GO:0009507);;cellular_component:plastid(GO:0009536);;cellular_component:chloroplast stroma(GO:0009570);;biological_process:protein transport(GO:0015031);;molecular_function:protein homodimerization activity(GO:0042803);;molecular_function:nucleotide binding(GO:0000166);;molecular_function:protein binding(GO:0005515);;molecul…	egu:105061087|-10000.0|K09487|HSP90B, TRA1; heat shock protein 90kDa beta|ko04141|Protein processing in endoplasmic reticulum;;ko04626|Plant-pathogen interaction;;	4641.GSMUA_Achr3P28100_001|-10000.0|COG0326|O|Molecular chaperone. Has ATPase activity (By similarity)	PF00183.16|HSP90|1.3e-196|Hsp90 protein	Q9SIF2|HS905_ARATH|-10000.0|Heat shock protein 90-5, chloroplastic OS=Arabidopsis thaliana GN=HSP90-5 PE=1 SV=1	AIZ68156.1|-10000.0|heat shock protein 83-like protein [Ornithogalum longebracteatum]
c223731_g10	cluster 3	-	-	-	-	-1.81482	0.00369882	0.0183052	down	-2.04926	0.00191116	0.0335736	down	-	-	-	-	-	-
c223743_g2	cluster 2	1.36464	3.85864e-05	0.0033713	up	-	-	-	-	-	-	-	-	cellular_component:chloroplast outer membrane(GO:0009707);;cellular_component:chloroplast outer membrane(GO:0009707);;cellular_component:membrane(GO:0016020);;cellular_component:integral component of membrane(GO:0016021);;biological_process:protein ubiquitination(GO:0016567);;molecular_function:transferase activity(GO:0016740);;molecular_function:metal ion binding(GO:0046872);;biological_process:…	-	4641.GSMUA_Achr7P18450_001|-158.0|ENOG410YF4M|O|Mitochondrial E3 ubiquitin protein ligase 1	-	Q8L7N4|SP1_ARATH|-143.3|E3 ubiquitin-protein ligase SP1 OS=Arabidopsis thaliana GN=SP1 PE=1 SV=1	AIZ68184.1|-166.7|mitochondrial ubiquitin ligase activator of NFKB 1 isoform X2 [Ornithogalum longebracteatum]
c223768_g3	cluster 1	1.53994	7.67632e-05	0.0036699	up	1.73011	3.56508e-05	0.00394232	up	1.31116	0.00518127	0.0485996	up	biological_process:purine nucleotide biosynthetic process(GO:0006164);;biological_process:'de novo' IMP biosynthetic process(GO:0006189);;cellular_component:chloroplast(GO:0009507);;cellular_component:chloroplast(GO:0009507);;cellular_component:plastid(GO:0009536);;molecular_function:lyase activity(GO:0016829);;molecular_function:carboxy-lyase activity(GO:0016831);;molecular_function:nucleotide b…	egu:105040545|-259.5|K11808|ADE2; phosphoribosylaminoimidazole carboxylase [EC:4.1.1.21]|ko00230|Purine metabolism;;	3694.POPTR_0013s04070.1|-248.4|COG0026|F|phosphoribosylaminoimidazole carboxylase atpase subunit	PF00731.18|AIRC|3.9e-66|AIR carboxylase	P55195|PUR6_VIGAC|-208.7|Phosphoribosylaminoimidazole carboxylase, chloroplastic (Fragment) OS=Vigna aconitifolia GN=PURKE PE=2 SV=1	ONK80388.1|-272.5|uncharacterized protein A4U43_C01F17120 [Asparagus officinalis]
c223960_g5	cluster 2	1.94745	0.0131301	0.038957	up	1.24933	0.0125642	0.0390069	up	-	-	-	-	cellular_component:thylakoid(GO:0009579);;cellular_component:membrane(GO:0016020);;cellular_component:chloroplast(GO:0009507);;cellular_component:chloroplast thylakoid membrane(GO:0009535);;cellular_component:plastid(GO:0009536)	-	4641.GSMUA_Achr1P18640_001|-93.9|ENOG410Z7Z7|S|Pentatricopeptide repeat-containing protein	-	O82741|SGR1_ARATH|-84.1|Protein STAY-GREEN 1, chloroplastic OS=Arabidopsis thaliana GN=SGR1 PE=1 SV=1	XP_019703118.1|-105.3|PREDICTED: pentatricopeptide repeat-containing protein At4g01400, mitochondrial [Elaeis guineensis]
c224011_g3	cluster 1	1.21497	0.00318554	0.0158495	up	-	-	-	-	-	-	-	-	cellular_component:chloroplast(GO:0009507);;cellular_component:chloroplast(GO:0009507);;cellular_component:plastid(GO:0009536);;molecular_function:kinase activity(GO:0016301);;biological_process:phosphorylation(GO:0016310);;molecular_function:transferase activity(GO:0016740);;molecular_function:metal ion binding(GO:0046872);;molecular_function:phosphoglucan, water dikinase activity(GO:0051752);;m…	-	29760.VIT_05s0062g00890.t01|-118.3|COG0574|G|phosphotransferase activity, paired acceptors	-	Q2QTC2|PWD_ORYSJ|-110.2|Phosphoglucan, water dikinase, chloroplastic OS=Oryza sativa subsp. japonica GN=GWD3 PE=3 SV=2	ONK58769.1|-120.1|uncharacterized protein A4U43_C09F16460 [Asparagus officinalis]
c224078_g1	cluster 5	-	-	-	-	-	-	-	-	1.0968	0.00188699	0.0335004	up	cellular_component:membrane(GO:0016020);;cellular_component:integral component of membrane(GO:0016021);;cellular_component:chloroplast membrane(GO:0031969);;biological_process:multicellular organism development(GO:0007275);;cellular_component:chloroplast(GO:0009507);;cellular_component:plastid(GO:0009536)	-	3711.Bra029704.1-P|-74.7|ENOG4111GA1|S|Domain of unknown function (DUF3411)	-	Q9C9Z2|RER3_ARATH|-74.7|Protein RETICULATA-RELATED 3, chloroplastic OS=Arabidopsis thaliana GN=RER3 PE=1 SV=1	EPS58690.1|-78.8|hypothetical protein M569_16122, partial [Genlisea aurea]
c224217_g1	cluster 2	1.31488	0.0010726	0.00886549	up	1.28284	0.00224514	0.0139119	up	-	-	-	-	cellular_component:mitochondrion(GO:0005739);;biological_process:translation(GO:0006412);;cellular_component:chloroplast(GO:0009507);;cellular_component:plastid(GO:0009536);;cellular_component:chloroplast stroma(GO:0009570);;molecular_function:ligase activity(GO:0016874);;molecular_function:glutaminyl-tRNA synthase (glutamine-hydrolyzing) activity(GO:0050567);;molecular_function:nucleotide bindin…	zma:100285129|-219.8|K02433|gatA, QRSL1; aspartyl-tRNA(Asn)/glutamyl-tRNA(Gln) amidotransferase subunit A [EC:6.3.5.6 6.3.5.7]|ko00970|Aminoacyl-tRNA biosynthesis;;	4533.OB04G33990.1|-221.0|COG0154|J|Allows the formation of correctly charged Gln-tRNA(Gln) through the transamidation of misacylated Glu-tRNA(Gln) in organisms which lack glutaminyl-tRNA synthetase. The reaction takes place in the presence of glutamine and ATP through an activated gamma-phospho-Glu-tRNA(Gln) (By similarity)	PF01425.19|Amidase|8.2e-145|Amidase	B6U151|GATA_MAIZE|-222.3|Glutamyl-tRNA(Gln) amidotransferase subunit A, chloroplastic/mitochondrial OS=Zea mays GN=GATA PE=2 SV=1	ACL54099.1|-219.0|unknown [Zea mays]
c224226_g2	cluster 3	-1.07677	0.00842609	0.0289392	down	-1.13248	0.00776193	0.0285627	down	-	-	-	-	-	-	-	-	-	-
c224321_g1	cluster 1	-	-	-	-	1.09696	0.00866043	0.0305003	up	-	-	-	-	biological_process:cellular amino acid biosynthetic process(GO:0008652);;biological_process:aromatic amino acid family biosynthetic process(GO:0009073);;cellular_component:chloroplast(GO:0009507);;cellular_component:chloroplast(GO:0009507);;cellular_component:plastid(GO:0009536);;molecular_function:transferase activity(GO:0016740);;molecular_function:transferase activity, transferring glycosyl gr…	egu:105058812|-134.8|K00766|trpD; anthranilate phosphoribosyltransferase [EC:2.4.2.18]|ko01230|Biosynthesis of amino acids;;ko00400|Phenylalanine, tyrosine and tryptophan biosynthesis;;	59689.scaffold_601857.1|-131.9|COG0547|E|Anthranilate phosphoribosyltransferase	PF00591.19|Glycos_transf_3|3.1e-96|Glycosyl transferase family, a/b domain	Q02166|TRPD_ARATH|-131.4|Anthranilate phosphoribosyltransferase, chloroplastic OS=Arabidopsis thaliana GN=PAT1 PE=2 SV=1	XP_020248135.1|-140.0|anthranilate phosphoribosyltransferase, chloroplastic-like isoform X1 [Asparagus officinalis]
c224384_g3	cluster 3	-1.17672	0.00109849	0.00897657	down	-1.90375	0.000901021	0.00916498	down	-	-	-	-	-	mus:103984038|-59.0|K01674|cah; carbonic anhydrase [EC:4.2.1.1]|ko00910|Nitrogen metabolism;;	4641.GSMUA_Achr5P05720_001|-60.1|COG3338|P|Carbonic anhydrase	-	-	XP_009399717.1|-58.2|PREDICTED: alpha carbonic anhydrase 7-like [Musa acuminata subsp. malaccensis]
c224461_g1	cluster 2	1.59072	0.000215983	0.00457355	up	1.05505	0.00127371	0.0106207	up	-	-	-	-	cellular_component:chloroplast(GO:0009507);;cellular_component:chloroplast(GO:0009507);;cellular_component:plastid(GO:0009536)	-	4641.GSMUA_Achr3P25130_001|-231.6|ENOG410XPP3|T|Cyclin-Dependent Kinase	-	Q9LV04|PAP14_ARATH|-189.9|Probable plastid-lipid-associated protein 14, chloroplastic OS=Arabidopsis thaliana GN=PAP14 PE=1 SV=1	XP_020265087.1|-267.3|probable plastid-lipid-associated protein 14, chloroplastic isoform X2 [Asparagus officinalis]
c224685_g2	cluster 3	-1.58267	0.00175945	0.0114177	down	-1.54079	0.00203308	0.0131429	down	-1.4641	0.00370838	0.0429272	down	cellular_component:integral component of membrane(GO:0016021);;molecular_function:hydrolase activity(GO:0016787);;cellular_component:chloroplast membrane(GO:0031969);;cellular_component:chloroplast(GO:0009507);;cellular_component:plastid(GO:0009536);;cellular_component:membrane(GO:0016020)	-	4641.GSMUA_Achr3P01450_001|-121.9|COG0671|I|PHOsphatase	-	Q8LFD1|LPP3_ARATH|-112.8|Putative lipid phosphate phosphatase 3, chloroplastic OS=Arabidopsis thaliana GN=LPP3 PE=2 SV=1	XP_020252047.1|-131.1|lipid phosphate phosphatase 2-like [Asparagus officinalis]
c224751_g1	cluster 2	1.11506	0.00308161	0.0155468	up	-	-	-	-	-	-	-	-	-	-	-	-	-	-
c224751_g6	cluster 1	2.13461	0.000134611	0.00412982	up	1.61446	0.000106921	0.0047495	up	-	-	-	-	cellular_component:chloroplast(GO:0009507);;cellular_component:plastid(GO:0009536);;cellular_component:chloroplast stroma(GO:0009570);;molecular_function:hydrolase activity(GO:0016787);;biological_process:proteolysis(GO:0006508);;molecular_function:peptidase activity(GO:0008233);;molecular_function:serine-type peptidase activity(GO:0008236)	-	29760.VIT_14s0006g01880.t01|-82.4|COG0740|O|Cleaves peptides in various proteins in a process that requires ATP hydrolysis. Has a chymotrypsin-like activity. Plays a major role in the degradation of misfolded proteins (By similarity)	-	Q9SXJ6|CLPP3_ARATH|-76.9|ATP-dependent Clp protease proteolytic subunit 3, chloroplastic OS=Arabidopsis thaliana GN=CLPP3 PE=1 SV=1	XP_020244321.1|-87.8|ATP-dependent Clp protease proteolytic subunit 3, chloroplastic [Asparagus officinalis]
c224765_g7	cluster 6	-	-	-	-	-	-	-	-	-	-	-	-	cellular_component:chloroplast(GO:0009507);;cellular_component:chloroplast(GO:0009507);;cellular_component:plastid(GO:0009536)	-	4641.GSMUA_Achr8P19160_001|-181.7|ENOG410Z7Z7|S|Pentatricopeptide repeat-containing protein	-	Q0WLC6|PP349_ARATH|-158.3|Pentatricopeptide repeat-containing protein MRL1, chloroplastic OS=Arabidopsis thaliana GN=MRL1 PE=1 SV=2	ONK73409.1|-193.5|uncharacterized protein A4U43_C04F31200 [Asparagus officinalis]
c224995_g1	cluster 2	1.75556	0.00169171	0.0112013	up	1.60173	0.000952311	0.00935487	up	-	-	-	-	biological_process:oxidation-reduction process(GO:0055114);;biological_process:nitrogen compound metabolic process(GO:0006807);;biological_process:L-glutamate biosynthetic process(GO:0097054);;biological_process:cellular amino acid biosynthetic process(GO:0008652);;cellular_component:chloroplast(GO:0009507);;cellular_component:chloroplast(GO:0009507);;cellular_component:plastid(GO:0009536);;molec…	mus:103992734|-10000.0|K00264|GLT1; glutamate synthase (NADPH/NADH) [EC:1.4.1.13 1.4.1.14]|ko00910|Nitrogen metabolism;;ko00250|Alanine, aspartate and glutamate metabolism;;ko01230|Biosynthesis of amino acids;;	3847.GLYMA19G16486.1|-10000.0|COG0067|E|glutamate synthase	PF01645.15|Glu_synthase|7.6e-161|Conserved region in glutamate synthase	Q9LV03|GLUT1_ARATH|-10000.0|Glutamate synthase 1 [NADH], chloroplastic OS=Arabidopsis thaliana GN=GLT1 PE=1 SV=2	XP_003553839.1|-10000.0|PREDICTED: glutamate synthase [NADH], amyloplastic isoform X1 [Glycine max]
c225030_g1	cluster 5	-	-	-	-	-	-	-	-	1.07329	0.00118333	0.0292753	up	cellular_component:plastid(GO:0009536);;biological_process:vitamin E biosynthetic process(GO:0010189);;molecular_function:transferase activity(GO:0016740);;biological_process:methylation(GO:0032259);;molecular_function:tocopherol O-methyltransferase activity(GO:0050342);;molecular_function:methyltransferase activity(GO:0008168);;cellular_component:chloroplast(GO:0009507);;cellular_component:chlor…	egu:105033221|-127.9|K05928|E2.1.1.95; tocopherol O-methyltransferase [EC:2.1.1.95]|ko00130|Ubiquinone and other terpenoid-quinone biosynthesis;;	4641.GSMUA_Achr1P27850_001|-129.1|ENOG410XP5G|S|Methyltransferase	-	Q6ZIK0|GTOMC_ORYSJ|-129.5|Probable tocopherol O-methyltransferase, chloroplastic OS=Oryza sativa subsp. japonica GN=VTE4 PE=2 SV=1	XP_010906230.1|-134.7|PREDICTED: probable tocopherol O-methyltransferase, chloroplastic isoform X2 [Elaeis guineensis]
c225082_g1	cluster 3	-1.42082	0.00125084	0.00956039	down	-1.80402	0.00295713	0.0161469	down	-1.76051	0.00180123	0.0329568	down	molecular_function:xenobiotic-transporting ATPase activity(GO:0008559);;cellular_component:membrane(GO:0016020);;cellular_component:membrane(GO:0016020);;cellular_component:integral component of membrane(GO:0016021);;molecular_function:hydrolase activity(GO:0016787);;molecular_function:nucleotide binding(GO:0000166);;molecular_function:ATP binding(GO:0005524);;biological_process:transport(GO:0006…	-	39947.LOC_Os04g49890.1|-10000.0|COG1132|V|(ABC) transporter	-	Q9M1C7|AB9C_ARATH|-10000.0|ABC transporter C family member 9 OS=Arabidopsis thaliana GN=ABCC9 PE=2 SV=2	XP_006445505.1|-10000.0|hypothetical protein CICLE_v10018481mg [Citrus clementina]
c225090_g1	cluster 2	2.07251	0.000251728	0.00482092	up	1.77676	0.000527107	0.00744803	up	1.04119	0.000987508	0.0276868	up	cellular_component:membrane(GO:0016020);;biological_process:carotenoid biosynthetic process(GO:0016117);;molecular_function:oxidoreductase activity(GO:0016491);;cellular_component:chloroplast membrane(GO:0031969);;molecular_function:metal ion binding(GO:0046872);;biological_process:oxidation-reduction process(GO:0055114);;molecular_function:monooxygenase activity(GO:0004497);;cellular_component:c…	pda:103706996|-261.8|K15747|LUT5, CYP97A3; beta-ring hydroxylase [EC:1.14.-.-]|ko00906|Carotenoid biosynthesis;;	4533.OB02G44100.1|-251.6|COG2124|Q|Cytochrome p450	PF00067.20|p450|9.7e-87|Cytochrome P450	Q93VK5|LUT5_ARATH|-243.9|Protein LUTEIN DEFICIENT 5, chloroplastic OS=Arabidopsis thaliana GN=CYP97A3 PE=1 SV=1	XP_020276253.1|-283.0|LOW QUALITY PROTEIN: protein LUTEIN DEFICIENT 5, chloroplastic [Asparagus officinalis]
c225111_g3	cluster 2	2.06346	3.80288e-05	0.00335304	up	1.65935	8.52176e-05	0.00441883	up	1.26834	0.00169528	0.0323214	up	cellular_component:chloroplast(GO:0009507);;cellular_component:chloroplast(GO:0009507);;cellular_component:plastid(GO:0009536)	-	4641.GSMUA_Achr1P08260_001|-123.2|COG0740|O|Cleaves peptides in various proteins in a process that requires ATP hydrolysis. Has a chymotrypsin-like activity. Plays a major role in the degradation of misfolded proteins (By similarity)	PF00574.21|CLP_protease|2e-61|Clp protease	Q9XJ36|CLPR2_ARATH|-110.1|ATP-dependent Clp protease proteolytic subunit-related protein 2, chloroplastic OS=Arabidopsis thaliana GN=CLPR2 PE=1 SV=1	XP_020255874.1|-135.7|ATP-dependent Clp protease proteolytic subunit-related protein 2, chloroplastic [Asparagus officinalis]
c225374_g1	cluster 2	1.18541	0.00059291	0.00677619	up	-	-	-	-	-	-	-	-	cellular_component:chloroplast(GO:0009507);;cellular_component:plastid(GO:0009536);;molecular_function:hydrolase activity(GO:0016787);;molecular_function:omega-amidase activity(GO:0050152);;molecular_function:omega-amidase activity(GO:0050152);;biological_process:oxaloacetate metabolic process(GO:0006107);;biological_process:malate metabolic process(GO:0006108);;cellular_component:chloroplast(GO:…	pda:103712796|-151.7|K13566|NIT2; omega-amidase [EC:3.5.1.3]|ko00250|Alanine, aspartate and glutamate metabolism;;	4641.GSMUA_Achr1P21960_001|-149.7|COG0388|S|nitrilase cyanide hydratase and apolipoprotein n-acyltransferase	PF00795.20|CN_hydrolase|6.3e-60|Carbon-nitrogen hydrolase	Q8RUF8|NILP3_ARATH|-147.6|Omega-amidase, chloroplastic OS=Arabidopsis thaliana GN=NLP3 PE=1 SV=1	AIU48772.1|-156.3|nitrilase/cyanide hydratase and apolipoprotein N-acyltransferase family protein, partial [Asparagus officinalis]
c225668_g1	cluster 3	-1.25142	0.00646448	0.0243546	down	-2.78948	0.00018492	0.00543737	down	-2.57754	0.00536389	0.0493439	down	-	-	4641.GSMUA_Achr3P31780_001|-69.7|ENOG410YC9T|S|Plant-specific domain TIGR01615 family protein	PF04720.10|PDDEXK_6|3.2e-69|PDDEXK-like family of unknown function	-	XP_020265324.1|-83.6|uncharacterized protein LOC109840906 [Asparagus officinalis]
c225822_g3	cluster 1	1.11137	0.000371295	0.00557875	up	1.66396	0.000289097	0.00624692	up	1.47934	0.000467412	0.0231662	up	biological_process:UMP salvage(GO:0044206);;molecular_function:uridine kinase activity(GO:0004849);;biological_process:CTP salvage(GO:0044211);;molecular_function:GTP binding(GO:0005525);;cellular_component:cytoplasm(GO:0005737);;cellular_component:cytoplasm(GO:0005737);;biological_process:metabolic process(GO:0008152);;biological_process:metabolic process(GO:0008152);;cellular_component:chloropl…	pda:103716149|-236.8|K00876|udk, UCK; uridine kinase [EC:2.7.1.48]|ko00240|Pyrimidine metabolism;;	39947.LOC_Os09g32820.1|-237.1|COG0035|F|Catalyzes the conversion of uracil and 5-phospho-alpha- D-ribose 1-diphosphate (PRPP) to UMP and diphosphate (By similarity)	PF14681.4|UPRTase|1e-73|Uracil phosphoribosyltransferase	Q9FKS0|UKL1_ARATH|-221.4|Uridine kinase-like protein 1, chloroplastic OS=Arabidopsis thaliana GN=UKL1 PE=1 SV=1	XP_020247574.1|-242.4|LOW QUALITY PROTEIN: uridine kinase-like protein 1, chloroplastic [Asparagus officinalis]
c225887_g1	cluster 3	-	-	-	-	-2.08714	0.000973498	0.0094568	down	-	-	-	-	cellular_component:chloroplast(GO:0009507);;cellular_component:plastid(GO:0009536);;molecular_function:lyase activity(GO:0016829);;molecular_function:isomerase activity(GO:0016853);;molecular_function:metal ion binding(GO:0046872);;molecular_function:copalyl diphosphate synthase activity(GO:0050559);;molecular_function:catalytic activity(GO:0003824);;biological_process:metabolic process(GO:000815…	smo:SELMODRAFT_450902|-130.1|K04120|E5.5.1.13; ent-copalyl diphosphate synthase [EC:5.5.1.13]|ko00904|Diterpenoid biosynthesis;;	88036.EFJ33583|-131.3|ENOG410XNXR|I|diphosphate synthase	-	Q675L5|TPSD2_PICAB|-183.3|Bifunctional isopimaradiene synthase, chloroplastic OS=Picea abies GN=TPS-ISO PE=1 SV=2	XP_020252772.1|-264.9|bifunctional abietadiene synthase, chloroplastic-like isoform X1 [Asparagus officinalis]
c225899_g1	cluster 2	1.76316	0.000891106	0.00809855	up	1.40639	0.00172706	0.0120989	up	-	-	-	-	biological_process:calcium-mediated signaling(GO:0019722);;cellular_component:plasma membrane(GO:0005886);;biological_process:cellular response to cold(GO:0070417);;cellular_component:plasma membrane(GO:0005886);;biological_process:cellular response to amino acid stimulus(GO:0071230);;biological_process:transport(GO:0006810);;biological_process:ion transport(GO:0006811);;biological_process:calciu…	-	4641.GSMUA_Achr9P02750_001|-10000.0|ENOG410ZZ8P|U|PBPe	PF01094.26|ANF_receptor|1.9e-83|Receptor family ligand binding region	Q8GXJ4|GLR34_ARATH|-10000.0|Glutamate receptor 3.4 OS=Arabidopsis thaliana GN=GLR3.4 PE=2 SV=2	XP_020256596.1|-10000.0|glutamate receptor 3.4-like isoform X1 [Asparagus officinalis]
c225909_g2	cluster 3	-1.35292	0.0109939	0.0345712	down	-2.40481	0.000382427	0.00668084	down	-	-	-	-	biological_process:aromatic amino acid family biosynthetic process(GO:0009073);;cellular_component:chloroplast(GO:0009507);;cellular_component:chloroplast(GO:0009507);;cellular_component:plastid(GO:0009536);;molecular_function:oxidoreductase activity(GO:0016491);;molecular_function:arogenate dehydrogenase (NADP+) activity(GO:0033730);;biological_process:oxidation-reduction process(GO:0055114);;bi…	nnu:104613112|-138.9|K15227|TYRAAT; arogenate dehydrogenase (NADP+), plant [EC:1.3.1.78]|ko01230|Biosynthesis of amino acids;;ko00400|Phenylalanine, tyrosine and tryptophan biosynthesis;;	39946.BGIOSGA023059-PA|-120.0|COG0287|E|prephenate dehydrogenase	-	Q9LMR3|TYRA2_ARATH|-94.5|Arogenate dehydrogenase 2, chloroplastic OS=Arabidopsis thaliana GN=TYRAAT2 PE=1 SV=1	OVA04048.1|-140.7|Prephenate dehydrogenase [Macleaya cordata]
c225949_g1	cluster 2	1.49947	4.47435e-05	0.00345512	up	1.26226	0.000202288	0.00557224	up	-	-	-	-	biological_process:leucine biosynthetic process(GO:0009098);;biological_process:leucine biosynthetic process(GO:0009098);;cellular_component:chloroplast(GO:0009507);;cellular_component:chloroplast(GO:0009507);;cellular_component:plastid(GO:0009536);;molecular_function:oxidoreductase activity(GO:0016491);;molecular_function:metal ion binding(GO:0046872);;biological_process:oxidation-reduction proc…	mus:103988546|-176.5|K00052|leuB, IMDH; 3-isopropylmalate dehydrogenase [EC:1.1.1.85]|ko01230|Biosynthesis of amino acids;;ko00660|C5-Branched dibasic acid metabolism;;ko01210|2-Oxocarboxylic acid metabolism;;ko00290|Valine, leucine and isoleucine biosynthesis;;	4558.Sb06g033720.1|-176.6|COG0473|E|3-isopropylmalate dehydrogenase activity	PF00180.18|Iso_dh|7.2e-135|Isocitrate/isopropylmalate dehydrogenase	P29102|LEU3_BRANA|-171.4|3-isopropylmalate dehydrogenase, chloroplastic OS=Brassica napus PE=2 SV=1	XP_020250563.1|-185.9|3-isopropylmalate dehydrogenase 2, chloroplastic-like [Asparagus officinalis]
c225965_g1	cluster 2	1.81089	0.000436627	0.00598239	up	1.58766	0.00050348	0.00731954	up	-	-	-	-	cellular_component:plastid inner membrane(GO:0009528);;cellular_component:plastid(GO:0009536);;cellular_component:chloroplast inner membrane(GO:0009706);;molecular_function:oxaloacetate transmembrane transporter activity(GO:0015131);;molecular_function:malate transmembrane transporter activity(GO:0015140);;biological_process:oxaloacetate transport(GO:0015729);;biological_process:L-glutamate trans…	-	3702.AT5G64290.1|-181.0|COG0471|P|Transporter	PF00939.17|Na_sulph_symp|9.8e-119|Sodium:sulfate symporter transmembrane region	Q9FMF7|DIT21_ARATH|-182.2|Dicarboxylate transporter 2.1, chloroplastic OS=Arabidopsis thaliana GN=DIT2-1 PE=1 SV=1	OWM87738.1|-183.8|hypothetical protein CDL15_Pgr016434 [Punica granatum]
c226369_g4	cluster 1	-	-	-	-	1.06832	0.00319321	0.0168617	up	-	-	-	-	cellular_component:chloroplast inner membrane(GO:0009706);;cellular_component:membrane(GO:0016020);;cellular_component:integral component of membrane(GO:0016021);;molecular_function:hydrolase activity(GO:0016787);;cellular_component:chloroplast(GO:0009507);;cellular_component:plastid inner membrane(GO:0009528);;cellular_component:plastid(GO:0009536)	-	4641.GSMUA_Achr10P20640_001|-63.1|ENOG410YGRX|S|PAP2 superfamily	-	F4J220|LPPE1_ARATH|-51.4|Lipid phosphate phosphatase epsilon 1, chloroplastic OS=Arabidopsis thaliana GN=LPPE1 PE=1 SV=1	XP_020251524.1|-78.4|lipid phosphate phosphatase epsilon 2, chloroplastic-like isoform X1 [Asparagus officinalis]
c226776_g2	cluster 2	1.36565	0.000101017	0.00391584	up	1.06474	0.000460599	0.0071002	up	-	-	-	-	biological_process:isoprenoid biosynthetic process(GO:0008299);;molecular_function:transferase activity(GO:0016740);;molecular_function:metal ion binding(GO:0046872);;molecular_function:trans-octaprenyltranstransferase activity(GO:0050347);;molecular_function:all-trans-nonaprenyl-diphosphate synthase (geranyl-diphosphate specific) activity(GO:0052923);;cellular_component:mitochondrion(GO:0005739)…	egu:105059274|-161.9|K14066|GPS; geranyl diphosphate synthase [EC:2.5.1.1]|ko00900|Terpenoid backbone biosynthesis;;	4641.GSMUA_Achr11P18540_001|-155.7|COG0142|H|synthase	PF00348.15|polyprenyl_synt|5.5e-71|Polyprenyl synthetase	Q653T6|SPS1_ORYSJ|-138.7|Solanesyl-diphosphate synthase 1, mitochondrial OS=Oryza sativa subsp. japonica GN=SPS1 PE=1 SV=1	AEG47694.1|-182.5|geranylgeranyl diphosphate synthase, partial [Allium sativum]
c226860_g1	cluster 1	1.2614	3.14745e-05	0.00328995	up	1.30919	5.86072e-05	0.00418091	up	-	-	-	-	-	-	29760.VIT_08s0040g02400.t01|-80.3|ENOG410YE21|S|interactor of constitutive active rops	-	-	XP_008805027.1|-88.4|PREDICTED: interactor of constitutive active ROPs 2, chloroplastic-like isoform X4 [Phoenix dactylifera]
c226961_g4	cluster 1	1.58747	0.00437467	0.0190992	up	1.4266	0.0060603	0.0244299	up	-	-	-	-	cellular_component:chloroplast stroma(GO:0009570);;molecular_function:oxidoreductase activity(GO:0016491);;molecular_function:L-malate dehydrogenase activity(GO:0030060);;biological_process:oxidation-reduction process(GO:0055114);;biological_process:tricarboxylic acid cycle(GO:0006099);;cellular_component:chloroplast(GO:0009507);;cellular_component:plastid(GO:0009536)	pda:103716396|-167.6|K00026|MDH2; malate dehydrogenase [EC:1.1.1.37]|ko00710|Carbon fixation in photosynthetic organisms;;ko01200|Carbon metabolism;;ko00630|Glyoxylate and dicarboxylate metabolism;;ko00620|Pyruvate metabolism;;ko00020|Citrate cycle (TCA cycle);;ko00270|Cysteine and methionine metabolism;;	4641.GSMUA_Achr6P02650_001|-167.8|COG0039|C|Catalyzes the reversible oxidation of malate to oxaloacetate (By similarity)	-	Q9SN86|MDHP_ARATH|-156.9|Malate dehydrogenase, chloroplastic OS=Arabidopsis thaliana GN=At3g47520 PE=1 SV=1	XP_020240792.1|-175.1|malate dehydrogenase, chloroplastic-like [Asparagus officinalis]
c226961_g5	cluster 1	1.0597	0.00354211	0.016823	up	1.38788	0.00153716	0.0114933	up	-	-	-	-	-	egu:105051050|-79.1|K00891|E2.7.1.71, aroK, aroL; shikimate kinase [EC:2.7.1.71]|ko01230|Biosynthesis of amino acids;;ko00400|Phenylalanine, tyrosine and tryptophan biosynthesis;;	4641.GSMUA_Achr6P10980_001|-80.5|COG0703|E|Catalyzes the specific phosphorylation of the 3-hydroxyl group of shikimic acid using ATP as a cosubstrate (By similarity)	-	-	XP_020246788.1|-83.6|probable inactive shikimate kinase like 1, chloroplastic [Asparagus officinalis]
c227011_g1	cluster 2	5.35261	0.000963016	0.00838457	up	4.78214	0.000533128	0.00747177	up	-	-	-	-	-	-	-	-	-	-
c227033_g3	cluster 1	-	-	-	-	1.03179	0.00599946	0.0242856	up	-	-	-	-	cellular_component:plastid(GO:0009536);;cellular_component:chloroplast stroma(GO:0009570);;molecular_function:hydrolase activity(GO:0016787);;molecular_function:metal ion binding(GO:0046872);;molecular_function:inositol monophosphate 3-phosphatase activity(GO:0052832);;molecular_function:inositol monophosphate 4-phosphatase activity(GO:0052833);;molecular_function:inositol monophosphate phosphata…	pda:103715648|-159.2|K01092|E3.1.3.25, IMPA, suhB; myo-inositol-1(or 4)-monophosphatase [EC:3.1.3.25]|ko00562|Inositol phosphate metabolism;;ko04070|Phosphatidylinositol signaling system;;	4641.GSMUA_Achr11P25660_001|-159.3|COG0483|G|inositol monophosphatase	PF00459.23|Inositol_P|1e-68|Inositol monophosphatase family	Q94F00|IMPL1_ARATH|-148.1|Phosphatase IMPL1, chloroplastic OS=Arabidopsis thaliana GN=IMPL1 PE=1 SV=2	XP_020241854.1|-163.2|phosphatase IMPL1, chloroplastic [Asparagus officinalis]
c227206_g3	cluster 1	1.8994	0.000676628	0.00715769	up	1.6126	0.00131788	0.010755	up	-	-	-	-	molecular_function:lysine-tRNA ligase activity(GO:0004824);;molecular_function:ATP binding(GO:0005524);;cellular_component:mitochondrion(GO:0005739);;cellular_component:mitochondrion(GO:0005739);;biological_process:translation(GO:0006412);;cellular_component:chloroplast(GO:0009507);;cellular_component:chloroplast(GO:0009507);;cellular_component:plastid(GO:0009536);;molecular_function:ligase activ…	egu:105046011|-229.5|K04567|KARS, lysS; lysyl-tRNA synthetase, class II [EC:6.1.1.6]|ko00970|Aminoacyl-tRNA biosynthesis;;	4533.OB02G34220.1|-229.8|COG1190|J|lysyl-trna synthetase	PF00152.18|tRNA-synt_2|5.7e-75|tRNA synthetases class II (D, K and N)	Q9LJE2|SYKM_ARATH|-222.6|Lysine--tRNA ligase, chloroplastic/mitochondrial OS=Arabidopsis thaliana GN=OVA5 PE=2 SV=1	XP_020253313.1|-237.9|LOW QUALITY PROTEIN: lysine--tRNA ligase, chloroplastic/mitochondrial [Asparagus officinalis]
c227263_g2	cluster 3	-3.66925	0.0004523	0.00607675	down	-2.47902	0.000123911	0.00495953	down	-	-	-	-	-	-	-	-	-	-
c227503_g2	cluster 6	-1.30964	0.000348791	0.00542862	down	-	-	-	-	-	-	-	-	molecular_function:catalytic activity(GO:0003824);;molecular_function:phosphoribosyl-AMP cyclohydrolase activity(GO:0004635);;molecular_function:phosphoribosyl-ATP diphosphatase activity(GO:0004636);;molecular_function:ATP binding(GO:0005524);;biological_process:metabolic process(GO:0008152);;biological_process:cellular amino acid biosynthetic process(GO:0008652);;cellular_component:chloroplast(G…	egu:105050963|-99.8|K11755|hisIE; phosphoribosyl-ATP pyrophosphohydrolase / phosphoribosyl-AMP cyclohydrolase [EC:3.6.1.31 3.5.4.19]|ko01230|Biosynthesis of amino acids;;ko00340|Histidine metabolism;;	4513.MLOC_21279.1|-96.6|COG0139|E|Phosphoribosyl-amp cyclohydrolase	-	O82768|HIS2_ARATH|-86.1|Histidine biosynthesis bifunctional protein hisIE, chloroplastic OS=Arabidopsis thaliana GN=HISN2 PE=1 SV=1	XP_010929492.1|-99.1|PREDICTED: histidine biosynthesis bifunctional protein hisIE, chloroplastic isoform X1 [Elaeis guineensis]
c227518_g6	cluster 1	2.06076	0.00245452	0.0136471	up	2.42194	0.000748749	0.00846058	up	2.01777	0.00162474	0.0320296	up	cellular_component:membrane(GO:0016020);;molecular_function:oxidoreductase activity(GO:0016491);;cellular_component:chloroplast membrane(GO:0031969);;molecular_function:metal ion binding(GO:0046872);;biological_process:oxidation-reduction process(GO:0055114);;molecular_function:monooxygenase activity(GO:0004497);;cellular_component:chloroplast(GO:0009507);;cellular_component:plastid(GO:0009536)	-	4641.GSMUA_Achr8P06940_001|-263.5|COG2124|Q|Cytochrome p450	PF00067.20|p450|6.8e-81|Cytochrome P450	O48921|C97B2_SOYBN|-257.8|Cytochrome P450 97B2, chloroplastic OS=Glycine max GN=CYP97B2 PE=2 SV=1	XP_020269292.1|-272.2|cytochrome P450 97B2, chloroplastic [Asparagus officinalis]
c227601_g1	cluster 4	1.47083	0.0067699	0.0251065	up	-	-	-	-	-	-	-	-	-	-	15368.BRADI5G10017.1|-102.7|COG0654|CH|oxidoreductase activity, acting on paired donors, with incorporation or reduction of molecular oxygen, NAD(P)H as one donor, and incorporation of one atom of oxygen	-	-	OAY36028.1|-111.3|hypothetical protein MANES_12G149600 [Manihot esculenta]
c22780_g1	cluster 3	-1.11168	0.000113197	0.00399233	down	-1.11165	8.05867e-05	0.00435085	down	-1.14726	0.00546585	0.0498381	down	cellular_component:chloroplast(GO:0009507);;cellular_component:plastid(GO:0009536);;molecular_function:rRNA binding(GO:0019843);;cellular_component:intracellular ribonucleoprotein complex(GO:0030529);;molecular_function:RNA binding(GO:0003723);;cellular_component:ribosome(GO:0005840);;cellular_component:chloroplast(GO:0009507)	nnu:104587247|-97.0|K02933|RP-L6, MRPL6, rplF; large subunit ribosomal protein L6|ko03010|Ribosome;;	29760.VIT_12s0059g02250.t01|-97.1|COG0097|J|This protein binds to the 23S rRNA, and is important in its secondary structure. It is located near the subunit interface in the base of the L7 L12 stalk, and near the tRNA binding site of the peptidyltransferase center (By similarity)	-	O23049|RK6_ARATH|-88.9|50S ribosomal protein L6, chloroplastic OS=Arabidopsis thaliana GN=RPL6 PE=2 SV=1	XP_020269863.1|-104.0|50S ribosomal protein L6, chloroplastic [Asparagus officinalis]
c227998_g2	cluster 5	-	-	-	-	-	-	-	-	1.32017	0.00388908	0.0439081	up	cellular_component:chloroplast stroma(GO:0009570);;molecular_function:transferase activity(GO:0016740);;molecular_function:nucleotidyltransferase activity(GO:0016779);;biological_process:isopentenyl diphosphate biosynthetic process, methylerythritol 4-phosphate pathway(GO:0019288);;molecular_function:2-C-methyl-D-erythritol 4-phosphate cytidylyltransferase activity(GO:0050518);;biological_process…	mus:103992656|-105.9|K00991|ispD; 2-C-methyl-D-erythritol 4-phosphate cytidylyltransferase [EC:2.7.7.60]|ko00900|Terpenoid backbone biosynthesis;;	4641.GSMUA_Achr7P23670_001|-107.2|COG1211|I|Catalyzes the formation of 4-diphosphocytidyl-2-C- methyl-D-erythritol from CTP and 2-C-methyl-D-erythritol 4- phosphate (MEP) (By similarity)	-	Q5N8G1|ISPD_ORYSJ|-98.1|2-C-methyl-D-erythritol 4-phosphate cytidylyltransferase, chloroplastic OS=Oryza sativa subsp. japonica GN=ISPD PE=2 SV=1	XP_020261921.1|-108.0|2-C-methyl-D-erythritol 4-phosphate cytidylyltransferase, chloroplastic [Asparagus officinalis]
c228171_g1	cluster 2	1.17954	0.00162735	0.0109311	up	1.01615	0.00228382	0.0139995	up	-	-	-	-	biological_process:mRNA processing(GO:0006397);;cellular_component:chloroplast(GO:0009507);;cellular_component:chloroplast(GO:0009507);;cellular_component:plastid(GO:0009536);;molecular_function:protein binding(GO:0005515);;cellular_component:mitochondrion(GO:0005739);;cellular_component:mitochondrion(GO:0005739)	-	39947.LOC_Os09g33480.1|-104.1|ENOG410YC7H|S|DAG protein	-	Q9LKA5|MORF8_ARATH|-96.5|Multiple organellar RNA editing factor 8, chloroplastic/mitochondrial OS=Arabidopsis thaliana GN=MORF8 PE=1 SV=1	XP_020254443.1|-111.0|LOW QUALITY PROTEIN: multiple organellar RNA editing factor 8, chloroplastic/mitochondrial-like [Asparagus officinalis]
c228200_g1	cluster 1	-	-	-	-	1.97246	0.00238319	0.0143147	up	-	-	-	-	biological_process:cellular amino acid biosynthetic process(GO:0008652);;cellular_component:amyloplast(GO:0009501);;cellular_component:amyloplast(GO:0009501);;cellular_component:plastid(GO:0009536);;molecular_function:glutamate synthase (NADH) activity(GO:0016040);;molecular_function:oxidoreductase activity(GO:0016491);;molecular_function:metal ion binding(GO:0046872);;molecular_function:iron-sul…	pda:103713334|-189.4|K00264|GLT1; glutamate synthase (NADPH/NADH) [EC:1.4.1.13 1.4.1.14]|ko00910|Nitrogen metabolism;;ko00250|Alanine, aspartate and glutamate metabolism;;ko01230|Biosynthesis of amino acids;;	29760.VIT_16s0098g00290.t01|-187.5|COG0067|E|glutamate synthase	PF04898.12|Glu_syn_central|5e-96|Glutamate synthase central domain	Q03460|GLSN_MEDSA|-184.5|Glutamate synthase [NADH], amyloplastic OS=Medicago sativa PE=1 SV=1	ONK69929.1|-195.8|uncharacterized protein A4U43_C05F28330 [Asparagus officinalis]
c228200_g2	cluster 1	2.31714	0.000620728	0.00690732	up	2.21734	0.00139882	0.0110191	up	1.50936	0.00245901	0.0367568	up	biological_process:cellular amino acid biosynthetic process(GO:0008652);;cellular_component:amyloplast(GO:0009501);;cellular_component:amyloplast(GO:0009501);;cellular_component:plastid(GO:0009536);;molecular_function:glutamate synthase (NADH) activity(GO:0016040);;molecular_function:oxidoreductase activity(GO:0016491);;molecular_function:metal ion binding(GO:0046872);;molecular_function:iron-sul…	mus:103992734|-10000.0|K00264|GLT1; glutamate synthase (NADPH/NADH) [EC:1.4.1.13 1.4.1.14]|ko00910|Nitrogen metabolism;;ko00250|Alanine, aspartate and glutamate metabolism;;ko01230|Biosynthesis of amino acids;;	4641.GSMUA_Achr7P24500_001|-10000.0|COG0067|E|glutamate synthase	PF01645.15|Glu_synthase|3.7e-108|Conserved region in glutamate synthase	Q03460|GLSN_MEDSA|-10000.0|Glutamate synthase [NADH], amyloplastic OS=Medicago sativa PE=1 SV=1	XP_006490512.1|-10000.0|PREDICTED: glutamate synthase [NADH], amyloplastic isoform X3 [Citrus sinensis]
c228355_g2	cluster 1	1.08631	0.000139641	0.00414435	up	1.19177	0.000856627	0.00896757	up	-	-	-	-	cellular_component:plastid(GO:0009536);;cellular_component:chloroplast stroma(GO:0009570);;molecular_function:transferase activity(GO:0016740);;molecular_function:transferase activity, transferring acyl groups(GO:0016746);;molecular_function:dihydrolipoyllysine-residue acetyltransferase activity(GO:0004742);;biological_process:glycolytic process(GO:0006096);;cellular_component:chloroplast(GO:0009…	pop:POPTR_0019s11470g|-185.7|K00627|DLAT, aceF, pdhC; pyruvate dehydrogenase E2 component (dihydrolipoamide acetyltransferase) [EC:2.3.1.12]|ko00020|Citrate cycle (TCA cycle);;ko01200|Carbon metabolism;;ko00620|Pyruvate metabolism;;ko00010|Glycolysis / Gluconeogenesis;;	3694.POPTR_0019s11470.1|-186.9|COG0508|C|Dehydrogenase	PF00198.21|2-oxoacid_dh|4.7e-67|2-oxoacid dehydrogenases acyltransferase (catalytic domain)	Q9C8P0|ODP25_ARATH|-182.5|Dihydrolipoyllysine-residue acetyltransferase component 5 of pyruvate dehydrogenase complex, chloroplastic OS=Arabidopsis thaliana GN=EMB3003 PE=2 SV=1	XP_018815032.1|-187.3|PREDICTED: dihydrolipoyllysine-residue acetyltransferase component 5 of pyruvate dehydrogenase complex, chloroplastic [Juglans regia]
c228372_g2	cluster 1	1.85973	0.000801385	0.00773413	up	2.06256	2.86447e-05	0.00386219	up	2.01933	0.00246749	0.0368019	up	cellular_component:thylakoid(GO:0009579);;molecular_function:oxidoreductase activity(GO:0016491);;biological_process:oxidation-reduction process(GO:0055114);;cellular_component:chloroplast(GO:0009507);;cellular_component:plastid(GO:0009536);;cellular_component:chloroplast thylakoid lumen(GO:0009543)	egu:105053549|-134.5|K00434|E1.11.1.11; L-ascorbate peroxidase [EC:1.11.1.11]|ko00480|Glutathione metabolism;;ko00053|Ascorbate and aldarate metabolism;;	29760.VIT_18s0001g06370.t01|-131.0|ENOG410XSAA|S|Thylakoid lumenal 29 kDa protein	-	Q9THX6|TL29_SOLLC|-116.1|Thylakoid lumenal 29 kDa protein, chloroplastic OS=Solanum lycopersicum GN=CLEB3J9 PE=3 SV=1	XP_010933064.1|-133.7|PREDICTED: thylakoid lumenal 29 kDa protein, chloroplastic isoform X1 [Elaeis guineensis]
c228592_g3	cluster 4	-	-	-	-	-1.36941	0.0160821	0.0458677	down	-	-	-	-	cellular_component:chloroplast(GO:0009507);;cellular_component:chloroplast(GO:0009507);;cellular_component:plastid(GO:0009536)	-	4641.GSMUA_Achr8P21900_001|-67.4|ENOG4111T2I|S|PsbP	-	F4J7A7|PPD7_ARATH|-53.7|PsbP domain-containing protein 7, chloroplastic OS=Arabidopsis thaliana GN=PPD7 PE=2 SV=1	XP_009414195.1|-65.4|PREDICTED: psbP domain-containing protein 7, chloroplastic [Musa acuminata subsp. malaccensis]
c228635_g5	cluster 4	1.77532	0.000486995	0.0062476	up	1.23969	0.000772646	0.00856598	up	-	-	-	-	biological_process:chloroplast organization(GO:0009658);;molecular_function:protein binding(GO:0005515);;biological_process:chloroplast relocation(GO:0009902);;molecular_function:protein binding(GO:0005515);;cellular_component:membrane(GO:0016020);;molecular_function:protein binding(GO:0005515);;molecular_function:GTP binding(GO:0005525);;molecular_function:GTP binding(GO:0005525);;biological_pro…	-	4081.Solyc07g065050.2.1|-165.1|COG0206|D|Essential cell division protein that forms a contractile ring structure (Z ring) at the future cell division site. The regulation of the ring assembly controls the timing and the location of cell division. One of the functions of the FtsZ ring is to recruit other cell division proteins to the septum to produce a new cell wall between the dividing cells. Bi…	-	Q42545|FTSZ1_ARATH|-163.0|Cell division protein FtsZ homolog 1, chloroplastic OS=Arabidopsis thaliana GN=FTSZ1 PE=1 SV=2	XP_020271629.1|-169.3|cell division protein FtsZ homolog 1, chloroplastic-like isoform X1 [Asparagus officinalis]
c228640_g4	cluster 2	1.20703	0.00321824	0.0159243	up	-	-	-	-	-	-	-	-	-	-	-	-	-	-
c228647_g3	cluster 2	1.51141	0.000489187	0.00625347	up	1.29575	0.000872124	0.00902588	up	-	-	-	-	cellular_component:chloroplast(GO:0009507);;cellular_component:plastid(GO:0009536);;molecular_function:hydrolase activity(GO:0016787);;molecular_function:metal ion binding(GO:0046872);;molecular_function:diaminohydroxyphosphoribosylaminopyrimidine deaminase activity(GO:0008835);;biological_process:riboflavin biosynthetic process(GO:0009231);;cellular_component:chloroplast(GO:0009507)	pda:103705345|-112.9|K11752|ribD; diaminohydroxyphosphoribosylaminopyrimidine deaminase / 5-amino-6-(5-phosphoribosylamino)uracil reductase [EC:3.5.4.26 1.1.1.193]|ko00740|Riboflavin metabolism;;	4641.GSMUA_Achr4P32190_001|-117.6|COG0117|H|Converts 2,5-diamino-6-(ribosylamino)-4(3h)-pyrimidinone 5'-phosphate into 5-amino-6-(ribosylamino)-2,4(1h,3h)- pyrimidinedione 5'-phosphate (By similarity)	-	B6TRH4|RIBD_MAIZE|-110.6|Riboflavin biosynthesis protein PYRD, chloroplastic OS=Zea mays GN=PYRD PE=2 SV=1	XP_020256316.1|-122.5|riboflavin biosynthesis protein PYRD, chloroplastic [Asparagus officinalis]
c228831_g3	cluster 2	1.07232	0.00140082	0.010077	up	-	-	-	-	-	-	-	-	cellular_component:chloroplast(GO:0009507);;cellular_component:chloroplast(GO:0009507);;cellular_component:plastid(GO:0009536)	-	29760.VIT_02s0012g01090.t01|-242.5|ENOG410Z7Z7|S|Pentatricopeptide repeat-containing protein	-	Q9LS25|PP420_ARATH|-226.0|Pentatricopeptide repeat-containing protein At5g46580, chloroplastic OS=Arabidopsis thaliana GN=At5g46580 PE=2 SV=1	XP_010275281.1|-241.8|PREDICTED: pentatricopeptide repeat-containing protein At5g46580, chloroplastic [Nelumbo nucifera]
c229223_g1	cluster 3	-2.50819	0.00044985	0.00607365	down	-2.72991	0.000200081	0.0055541	down	-2.48306	0.000272932	0.0216751	down	cellular_component:chloroplast(GO:0009507);;cellular_component:chloroplast(GO:0009507);;cellular_component:plastid(GO:0009536);;molecular_function:isomerase activity(GO:0016853);;molecular_function:metal ion binding(GO:0046872);;molecular_function:phosphoglucomutase activity(GO:0004614);;biological_process:carbohydrate metabolic process(GO:0005975);;biological_process:glucose metabolic process(GO…	gmx:100802730|-242.5|K01835|pgm; phosphoglucomutase [EC:5.4.2.2]|ko00052|Galactose metabolism;;ko00230|Purine metabolism;;ko00520|Amino sugar and nucleotide sugar metabolism;;ko00030|Pentose phosphate pathway;;ko00500|Starch and sucrose metabolism;;ko00010|Glycolysis / Gluconeogenesis;;	3847.GLYMA10G38590.1|-243.8|COG0033|G|phosphoglucomutase	-	Q9SM59|PGMP_PEA|-239.1|Phosphoglucomutase, chloroplastic OS=Pisum sativum GN=PGMP PE=2 SV=1	XP_003536492.1|-241.7|PREDICTED: phosphoglucomutase, chloroplastic [Glycine max]
c229238_g5	cluster 4	1.72499	0.000480325	0.00621287	up	1.18731	0.000946693	0.00933548	up	-	-	-	-	-	-	-	-	-	XP_020265770.1|-53.4|nucleoid-associated protein At2g24020, chloroplastic isoform X1 [Asparagus officinalis]
c229390_g5	cluster 3	-	-	-	-	-1.21429	5.27008e-05	0.00418091	down	-1.5014	0.000316206	0.0218913	down	cellular_component:plastid(GO:0009536);;biological_process:rRNA processing(GO:0006364);;cellular_component:chloroplast(GO:0009507);;cellular_component:chloroplast(GO:0009507)	-	3711.Bra011557.1-P|-66.3|COG0858|J|Associates with free 30S ribosomal subunits (but not with 30S subunits that are part of 70S ribosomes or polysomes). Essential for efficient processing of 16S rRNA. May interact with the 5'-terminal helix region of 16S rRNA (By similarity)	-	O65693|RBFA_ARATH|-64.6|Probable ribosome-binding factor A, chloroplastic OS=Arabidopsis thaliana GN=At4g34730 PE=2 SV=2	XP_020245245.1|-67.6|probable ribosome-binding factor A, chloroplastic [Asparagus officinalis]
c229723_g7	cluster 1	1.93629	1.44634e-05	0.00313445	up	2.7871	8.67423e-06	0.00336618	up	2.73525	0.000146933	0.0197061	up	-	-	4641.GSMUA_Achr4P14640_001|-120.2|ENOG4111FM2|S|PQ loop repeat	-	-	XP_020277128.1|-126.2|probable vacuolar amino acid transporter YPQ1 [Asparagus officinalis]
c229790_g3	cluster 1	1.62678	0.00345464	0.0165799	up	1.4036	0.00513552	0.0222366	up	-	-	-	-	cellular_component:mitochondrion(GO:0005739);;cellular_component:mitochondrion(GO:0005739);;biological_process:purine nucleotide biosynthetic process(GO:0006164);;biological_process:'de novo' IMP biosynthetic process(GO:0006189);;cellular_component:chloroplast(GO:0009507);;cellular_component:chloroplast(GO:0009507);;cellular_component:plastid(GO:0009536);;molecular_function:ligase activity(GO:001…	pda:103697006|-158.3|K01933|purM; phosphoribosylformylglycinamidine cyclo-ligase [EC:6.3.3.1]|ko00230|Purine metabolism;;	4641.GSMUA_Achr11P25390_001|-155.8|COG0150|F|phosphoribosylaminoimidazole synthetase	-	P52424|PUR5_VIGUN|-148.9|Phosphoribosylformylglycinamidine cyclo-ligase, chloroplastic/mitochondrial OS=Vigna unguiculata GN=PUR5 PE=2 SV=1	XP_008776989.1|-157.5|PREDICTED: phosphoribosylformylglycinamidine cyclo-ligase, chloroplastic/mitochondrial [Phoenix dactylifera]
c229917_g1	cluster 1	-	-	-	-	1.65071	0.00772032	0.0284931	up	-	-	-	-	-	-	-	-	-	-
c229966_g3	cluster 2	1.64684	0.0142233	0.0411951	up	-	-	-	-	-	-	-	-	-	-	39947.LOC_Os09g26970.1|-93.1|COG2124|Q|Cytochrome p450	PF07727.12|RVT_2|2.6e-94|Reverse transcriptase (RNA-dependent DNA polymerase)	-	CAN83392.1|-111.0|hypothetical protein VITISV_041406 [Vitis vinifera]
c230060_g2	cluster 4	2.06826	0.00017314	0.0042942	up	1.18494	0.000686636	0.00820576	up	-	-	-	-	biological_process:vitamin E biosynthetic process(GO:0010189);;biological_process:vitamin E biosynthetic process(GO:0010189);;biological_process:photosynthesis(GO:0015979);;biological_process:chlorophyll biosynthetic process(GO:0015995);;biological_process:chlorophyll biosynthetic process(GO:0015995);;biological_process:chlorophyll biosynthetic process(GO:0015995);;molecular_function:oxidoreducta…	sind:105157101|-212.4|K10960|chlP, bchP; geranylgeranyl diphosphate/geranylgeranyl-bacteriochlorophyllide a reductase [EC:1.3.1.83 1.3.1.111]|ko00900|Terpenoid backbone biosynthesis;;ko00860|Porphyrin and chlorophyll metabolism;;	3694.POPTR_0012s07060.1|-208.2|COG0644|C|geranylgeranyl reductase	-	Q9ZS34|CHLP_TOBAC|-208.6|Geranylgeranyl diphosphate reductase, chloroplastic OS=Nicotiana tabacum GN=CHLP PE=2 SV=1	KZV28131.1|-214.1|geranylgeranyl diphosphate reductase, chloroplastic [Dorcoceras hygrometricum]
c230063_g4	cluster 1	1.1896	0.00052866	0.0064403	up	1.08952	0.00116733	0.0102063	up	1.05976	0.000547315	0.0241801	up	molecular_function:hydrolase activity(GO:0016787);;molecular_function:ADP-sugar diphosphatase activity(GO:0019144);;molecular_function:metal ion binding(GO:0046872);;cellular_component:chloroplast(GO:0009507);;cellular_component:chloroplast(GO:0009507);;cellular_component:plastid(GO:0009536)	egu:105054694|-115.0|K18447|NUDX14; ADP-sugar diphosphatase [EC:3.6.1.21]|ko00230|Purine metabolism;;ko00500|Starch and sucrose metabolism;;ko00051|Fructose and mannose metabolism;;	4113.PGSC0003DMT400010065|-102.3|COG0494|L|Nudix hydrolase	-	Q9SZ63|NUD14_ARATH|-96.7|Nudix hydrolase 14, chloroplastic OS=Arabidopsis thaliana GN=NUDT14 PE=1 SV=2	XP_010934567.1|-114.2|PREDICTED: nudix hydrolase 14, chloroplastic isoform X1 [Elaeis guineensis]
c230069_g8	cluster 2	1.30662	0.000760586	0.00754999	up	-	-	-	-	-	-	-	-	cellular_component:chloroplast(GO:0009507);;cellular_component:plastid outer membrane(GO:0009527);;cellular_component:plastid(GO:0009536);;cellular_component:chloroplast outer membrane(GO:0009707);;cellular_component:membrane(GO:0016020);;cellular_component:integral component of membrane(GO:0016021);;molecular_function:lyase activity(GO:0016829);;biological_process:transport of virus in host, tis…	-	4641.GSMUA_Achr6P08100_001|-122.1|ENOG410Z81Y|S|CpeT/CpcT family (DUF1001)	-	Q9FI46|CRL_ARATH|-110.3|Chromophore lyase CRL, chloroplastic OS=Arabidopsis thaliana GN=CRL PE=1 SV=1	XP_020246486.1|-130.9|chromophore lyase CRL, chloroplastic [Asparagus officinalis]
c230248_g1	cluster 4	1.08036	0.000570685	0.00669269	up	-	-	-	-	-	-	-	-	molecular_function:ATP binding(GO:0005524);;cellular_component:mitochondrion(GO:0005739);;cellular_component:mitochondrion(GO:0005739);;biological_process:translation(GO:0006412);;cellular_component:chloroplast(GO:0009507);;cellular_component:chloroplast(GO:0009507);;cellular_component:plastid(GO:0009536);;molecular_function:ligase activity(GO:0016874);;molecular_function:nucleotide binding(GO:00…	egu:105057102|-274.5|K01887|RARS, argS; arginyl-tRNA synthetase [EC:6.1.1.19]|ko00970|Aminoacyl-tRNA biosynthesis;;	4533.OB05G14060.1|-266.1|COG0018|J|arginyL-tRNA synthetase	PF00750.17|tRNA-synt_1d|1.7e-117|tRNA synthetases class I (R)	O23247|SYRM_ARATH|-243.2|Arginine--tRNA ligase, chloroplastic/mitochondrial OS=Arabidopsis thaliana GN=EMB1027 PE=1 SV=1	ONK67931.1|-290.9|uncharacterized protein A4U43_C05F5350 [Asparagus officinalis]
c230576_g2	cluster 2	1.759	2.43606e-05	0.00319519	up	1.45242	2.42969e-05	0.00385486	up	-	-	-	-	biological_process:pentose-phosphate shunt(GO:0006098);;cellular_component:chloroplast(GO:0009507);;cellular_component:chloroplast(GO:0009507);;cellular_component:plastid(GO:0009536);;molecular_function:oxidoreductase activity(GO:0016491);;biological_process:oxidation-reduction process(GO:0055114);;molecular_function:glucose-6-phosphate dehydrogenase activity(GO:0004345);;biological_process:carbo…	egu:105049718|-267.9|K00036|G6PD, zwf; glucose-6-phosphate 1-dehydrogenase [EC:1.1.1.49 1.1.1.363]|ko01200|Carbon metabolism;;ko00480|Glutathione metabolism;;ko00030|Pentose phosphate pathway;;	4558.Sb06g003160.1|-265.9|COG0364|G|Glucose-6-phosphate 1-dehydrogenase	PF02781.14|G6PD_C|1.1e-111|Glucose-6-phosphate dehydrogenase, C-terminal domain	Q43793|G6PDC_TOBAC|-258.1|Glucose-6-phosphate 1-dehydrogenase, chloroplastic OS=Nicotiana tabacum PE=2 SV=1	XP_020261101.1|-282.5|glucose-6-phosphate 1-dehydrogenase, chloroplastic-like isoform X2 [Asparagus officinalis]
c230787_g3	cluster 4	1.04162	0.000455123	0.00608778	up	-	-	-	-	-	-	-	-	cellular_component:plastid(GO:0009536);;cellular_component:chloroplast inner membrane(GO:0009706);;biological_process:vitamin E biosynthetic process(GO:0010189);;cellular_component:membrane(GO:0016020);;cellular_component:integral component of membrane(GO:0016021);;molecular_function:transferase activity(GO:0016740);;biological_process:methylation(GO:0032259);;molecular_function:2-methyl-6-gerany…	mus:103975699|-156.4|K12502|VTE3, APG1; MPBQ/MSBQ methyltransferase [EC:2.1.1.295]|ko00130|Ubiquinone and other terpenoid-quinone biosynthesis;;	4538.ORGLA12G0160800.1|-152.1|COG0500|Q|Methyltransferase	-	Q2QM69|BQMT2_ORYSJ|-153.3|2-methyl-6-phytyl-1,4-hydroquinone methyltransferase 2, chloroplastic OS=Oryza sativa subsp. japonica GN=Os12g0615400 PE=2 SV=2	XP_020256146.1|-158.1|2-methyl-6-phytyl-1,4-hydroquinone methyltransferase 1, chloroplastic [Asparagus officinalis]
c230907_g1	cluster 3	-1.07349	0.00911427	0.0304671	down	-	-	-	-	-	-	-	-	-	-	4641.GSMUA_Achr11P23360_001|-70.4|ENOG410YG9K|S|RNA recognition motif. (a.k.a. RRM, RBD, or RNP domain)	-	-	XP_020247435.1|-80.1|31 kDa ribonucleoprotein, chloroplastic-like [Asparagus officinalis]
c230945_g4	cluster 4	1.97519	0.000129537	0.00411969	up	1.61232	0.00250957	0.014755	up	-	-	-	-	cellular_component:plastid(GO:0009536);;biological_process:translation(GO:0006412);;cellular_component:chloroplast(GO:0009507);;cellular_component:chloroplast(GO:0009507)	-	3694.POPTR_0002s05330.1|-92.9|COG0233|J|Responsible for the release of ribosomes from messenger RNA at the termination of protein biosynthesis. May increase the efficiency of translation by recycling ribosomes from one round of translation to another (By similarity)	PF01765.17|RRF|1.5e-60|Ribosome recycling factor	A2YMU2|RRFC_ORYSI|-86.8|Ribosome-recycling factor, chloroplastic OS=Oryza sativa subsp. indica GN=OsI_26546 PE=1 SV=2	XP_020275344.1|-104.3|ribosome-recycling factor, chloroplastic [Asparagus officinalis]
c231252_g5	cluster 3	-	-	-	-	-2.03376	0.00431339	0.0199715	down	-	-	-	-	-	-	-	-	-	-
c231276_g7	cluster 2	2.4168	1.70346e-06	0.00213978	up	1.58845	0.000128481	0.00500865	up	-	-	-	-	-	-	4558.Sb01g009350.1|-78.8|ENOG4111JPR|O|AhpC/TSA family	-	-	XP_010939360.1|-81.5|PREDICTED: thioredoxin-like protein AAED1, chloroplastic [Elaeis guineensis]
c231360_g5	cluster 2	1.57869	0.00896604	0.0301354	up	1.68086	0.00139204	0.0109964	up	-	-	-	-	cellular_component:integral component of membrane(GO:0016021);;cellular_component:chloroplast membrane(GO:0031969);;cellular_component:chloroplast(GO:0009507);;cellular_component:plastid(GO:0009536);;cellular_component:membrane(GO:0016020)	-	4641.GSMUA_Achr7P11980_001|-66.8|ENOG41100EE|S|NA	-	Q8LFP9|ABA4_ARATH|-61.3|Protein ABA DEFICIENT 4, chloroplastic OS=Arabidopsis thaliana GN=ABA4 PE=2 SV=1	XP_020251862.1|-72.0|protein ABA DEFICIENT 4, chloroplastic-like isoform X1 [Asparagus officinalis]
c231444_g1	cluster 1	1.02059	0.00222019	0.0129362	up	-	-	-	-	-	-	-	-	biological_process:transport(GO:0006810);;biological_process:amino acid transport(GO:0006865);;cellular_component:endomembrane system(GO:0012505);;molecular_function:symporter activity(GO:0015293);;cellular_component:membrane(GO:0016020);;cellular_component:integral component of membrane(GO:0016021);;cellular_component:nuclear membrane(GO:0031965);;cellular_component:nucleus(GO:0005634);;cellular…	-	29760.VIT_18s0001g02020.t01|-92.0|COG0814|E|amino acid transport	-	Q39134|AAP3_ARATH|-90.2|Amino acid permease 3 OS=Arabidopsis thaliana GN=AAP3 PE=1 SV=2	XP_008810907.2|-90.8|PREDICTED: amino acid permease 3-like [Phoenix dactylifera]
c231488_g1	cluster 4	-	-	-	-	-	-	-	-	-	-	-	-	cellular_component:thylakoid(GO:0009579);;cellular_component:membrane(GO:0016020);;cellular_component:integral component of membrane(GO:0016021);;molecular_function:metal ion binding(GO:0046872);;cellular_component:chloroplast(GO:0009507);;cellular_component:chloroplast thylakoid membrane(GO:0009535);;cellular_component:plastid(GO:0009536)	-	4641.GSMUA_Achr11P01160_001|-75.4|ENOG41121N2|O|zinc ion binding	-	Q8GT75|NIP1_ARATH|-66.7|NEP1-interacting protein 1 OS=Arabidopsis thaliana GN=NIP1 PE=1 SV=2	XP_020261680.1|-82.5|NEP1-interacting protein 1-like [Asparagus officinalis]
c231505_g2	cluster 4	2.47723	0.000112184	0.00399233	up	1.87983	0.000625247	0.00795224	up	-	-	-	-	biological_process:metabolic process(GO:0008152);;molecular_function:glucose-1-phosphate adenylyltransferase activity(GO:0008878);;cellular_component:chloroplast(GO:0009507);;cellular_component:chloroplast(GO:0009507);;cellular_component:plastid(GO:0009536);;molecular_function:transferase activity(GO:0016740);;molecular_function:nucleotidyltransferase activity(GO:0016779);;biological_process:star…	vra:106765074|-145.3|K00975|glgC; glucose-1-phosphate adenylyltransferase [EC:2.7.7.27]|ko00520|Amino sugar and nucleotide sugar metabolism;;ko00500|Starch and sucrose metabolism;;	3694.POPTR_0014s16990.1|-145.9|COG0448|G|Catalyzes the synthesis of ADP-glucose, a sugar donor used in elongation reactions on alpha-glucans (By similarity)	-	P52416|GLGS1_VICFA|-147.1|Glucose-1-phosphate adenylyltransferase small subunit 1, chloroplastic OS=Vicia faba GN=AGPC PE=2 SV=1	XP_014505054.1|-144.5|PREDICTED: glucose-1-phosphate adenylyltransferase small subunit 2, chloroplastic [Vigna radiata var. radiata]
c231688_g1	cluster 4	1.33619	0.000903697	0.00814663	up	-	-	-	-	-	-	-	-	-	-	4081.Solyc04g025650.2.1|-78.2|ENOG410ZJWB|S|FAD binding domain	-	-	XP_020246475.1|-161.8|uncharacterized protein LOC109824317 [Asparagus officinalis]
c231931_g4	cluster 3	-1.2926	0.000890221	0.00809459	down	-1.40067	0.000380915	0.00667912	down	-1.01995	0.000925656	0.0271265	down	-	-	-	-	-	XP_020272665.1|-150.9|uncharacterized protein LOC109847837 [Asparagus officinalis]
c232000_g3	cluster 1	1.25321	0.004649	0.0198284	up	-	-	-	-	-	-	-	-	-	-	-	-	-	-
c232311_g1	cluster 1	1.2071	7.4621e-05	0.00364148	up	1.28942	0.000323656	0.00636619	up	1.28839	0.00232337	0.035949	up	cellular_component:chromoplast(GO:0009509);;cellular_component:chromoplast(GO:0009509);;cellular_component:plastid(GO:0009536);;cellular_component:chloroplast stroma(GO:0009570);;molecular_function:transferase activity(GO:0016740);;biological_process:cysteine biosynthetic process(GO:0019344);;biological_process:cysteine biosynthetic process(GO:0019344);;molecular_function:cysteine synthase activi…	pda:103715024|-166.7|K01738|cysK; cysteine synthase A [EC:2.5.1.47]|ko01200|Carbon metabolism;;ko01230|Biosynthesis of amino acids;;ko00270|Cysteine and methionine metabolism;;ko00920|Sulfur metabolism;;	3694.POPTR_0013s13150.1|-167.2|COG0031|E|cysteine biosynthetic process from serine	PF00291.23|PALP|3.6e-67|Pyridoxal-phosphate dependent enzyme	P32260|CYSKP_SPIOL|-160.1|Cysteine synthase, chloroplastic/chromoplastic OS=Spinacia oleracea GN=CYSK PE=1 SV=2	AAX07221.1|-210.0|chloroplast cysteine synthase GCS2 [Allium sativum]
c232320_g1	cluster 2	2.30713	0.00340028	0.0164305	up	1.41802	0.0155459	0.0448844	up	-	-	-	-	biological_process:cellular amino acid biosynthetic process(GO:0008652);;cellular_component:chloroplast(GO:0009507);;cellular_component:chloroplast(GO:0009507);;cellular_component:plastid(GO:0009536);;molecular_function:transferase activity(GO:0016740);;molecular_function:O-phospho-L-serine:2-oxoglutarate aminotransferase activity(GO:0004648);;biological_process:L-serine biosynthetic process(GO:0…	egu:105053256|-167.5|K00831|serC, PSAT1; phosphoserine aminotransferase [EC:2.6.1.52]|ko00260|Glycine, serine and threonine metabolism;;ko01200|Carbon metabolism;;ko00750|Vitamin B6 metabolism;;ko01230|Biosynthesis of amino acids;;	3694.POPTR_0005s10290.1|-165.1|COG1932|E|Catalyzes the reversible conversion of 3- phosphohydroxypyruvate to phosphoserine and of 3-hydroxy-2-oxo-4- phosphonooxybutanoate to phosphohydroxythreonine (By similarity)	-	Q96255|SERB1_ARATH|-160.3|Phosphoserine aminotransferase 1, chloroplastic OS=Arabidopsis thaliana GN=PSAT1 PE=1 SV=1	XP_010932656.1|-166.7|PREDICTED: phosphoserine aminotransferase 2, chloroplastic-like [Elaeis guineensis]
c232530_g1	cluster 1	1.67193	0.00041859	0.00585875	up	1.41753	0.000471678	0.00715477	up	1.23866	0.00290438	0.039412	up	-	-	-	-	-	-
c232755_g1	cluster 5	-	-	-	-	1.21279	0.0123724	0.038626	up	-	-	-	-	cellular_component:chloroplast(GO:0009507);;cellular_component:plastid(GO:0009536);;molecular_function:oxidoreductase activity(GO:0016491);;molecular_function:metal ion binding(GO:0046872);;biological_process:oxidation-reduction process(GO:0055114);;molecular_function:ferroxidase activity(GO:0004322);;biological_process:cellular iron ion homeostasis(GO:0006879);;cellular_component:chloroplast(GO:…	-	3847.GLYMA11G35610.1|-90.0|ENOG410Y5ZV|P|Stores iron in a soluble, non-toxic, readily available form. Important for iron homeostasis (By similarity)	-	Q948P6|FRI3_SOYBN|-91.2|Ferritin-3, chloroplastic OS=Glycine max PE=2 SV=1	ABJ99593.1|-98.5|ferritin [Lycoris aurea]
c233151_g1	cluster 3	-1.31147	0.000671835	0.00714658	down	-1.42907	0.00139088	0.0109934	down	-1.74039	0.00411275	0.0447346	down	-	-	-	-	-	-
c233471_g1	cluster 2	2.00842	5.11209e-05	0.00351314	up	1.80008	6.18065e-05	0.0041923	up	-	-	-	-	cellular_component:chloroplast(GO:0009507);;cellular_component:chloroplast(GO:0009507);;cellular_component:plastid(GO:0009536);;cellular_component:intracellular ribonucleoprotein complex(GO:0030529);;cellular_component:mitochondrion(GO:0005739);;cellular_component:mitochondrion(GO:0005739);;cellular_component:ribosome(GO:0005840)	dosa:Os09t0498100-01|-57.8|K02959|RP-S16, MRPS16, rpsP; small subunit ribosomal protein S16|ko03010|Ribosome;;	4538.ORGLA09G0117600.1|-59.2|COG0228|J|30s ribosomal protein S16	-	Q9LTS6|RS16B_ARATH|-55.8|30S ribosomal protein S16-2, chloroplastic/mitochondrial OS=Arabidopsis thaliana GN=RPS16-2 PE=2 SV=1	EEE69984.1|-57.0|hypothetical protein OsJ_29887 [Oryza sativa Japonica Group]
c249871_g1	cluster 1	2.1969	3.45727e-05	0.00332543	up	2.31475	3.71255e-05	0.00395105	up	1.60058	0.00121164	0.029405	up	cellular_component:plastid inner membrane(GO:0009528);;cellular_component:plastid(GO:0009536);;cellular_component:chloroplast inner membrane(GO:0009706);;biological_process:protein transport(GO:0015031);;cellular_component:membrane(GO:0016020);;molecular_function:oxidoreductase activity(GO:0016491);;biological_process:oxidation-reduction process(GO:0055114);;molecular_function:calmodulin binding(…	-	4641.GSMUA_AchrUn_randomP07530_001|-141.5|COG1028|S|Dehydrogenase reductase	-	Q6RVV4|TIC32_PEA|-123.0|Short-chain dehydrogenase TIC 32, chloroplastic OS=Pisum sativum GN=TIC32 PE=1 SV=1	XP_008787473.1|-144.3|PREDICTED: short-chain dehydrogenase TIC 32, chloroplastic-like [Phoenix dactylifera]
c249877_g1	cluster 1	1.67733	0.000995373	0.00851605	up	1.88313	0.000648621	0.00802065	up	1.68065	0.00119961	0.029402	up	cellular_component:plastid(GO:0009536);;cellular_component:thylakoid(GO:0009579);;cellular_component:membrane(GO:0016020);;molecular_function:transferase activity(GO:0016740);;biological_process:reductive pentose-phosphate cycle(GO:0019253);;molecular_function:metal ion binding(GO:0046872);;molecular_function:transketolase activity(GO:0004802);;cellular_component:chloroplast(GO:0009507);;cellular…	mus:103998561|-10000.0|K00615|E2.2.1.1, tktA, tktB; transketolase [EC:2.2.1.1]|ko00710|Carbon fixation in photosynthetic organisms;;ko01200|Carbon metabolism;;ko01230|Biosynthesis of amino acids;;ko00030|Pentose phosphate pathway;;	4555.Si005927m|-10000.0|COG0021|G|Transketolase	PF00456.19|Transketolase_N|3.3e-150|Transketolase, thiamine diphosphate binding domain	Q7SIC9|TKTC_MAIZE|-10000.0|Transketolase, chloroplastic OS=Zea mays PE=1 SV=1	XP_009418330.1|-10000.0|PREDICTED: transketolase, chloroplastic-like [Musa acuminata subsp. malaccensis]
c249976_g1	cluster 3	-	-	-	-	-1.09365	0.00182283	0.0124003	down	-	-	-	-	cellular_component:chloroplast(GO:0009507);;cellular_component:chloroplast(GO:0009507);;cellular_component:plastid(GO:0009536);;molecular_function:linoleate 13S-lipoxygenase activity(GO:0016165);;molecular_function:linoleate 13S-lipoxygenase activity(GO:0016165);;molecular_function:oxidoreductase activity(GO:0016491);;biological_process:oxylipin biosynthetic process(GO:0031408);;biological_proces…	pda:103719871|-10000.0|K00454|LOX2S; lipoxygenase [EC:1.13.11.12]|ko00591|Linoleic acid metabolism;;ko00592|alpha-Linolenic acid metabolism;;	29760.VIT_01s0010g02750.t01|-10000.0|ENOG410YN4N|S|Plant lipoxygenase may be involved in a number of diverse aspects of plant physiology including growth and development, pest resistance, and senescence or responses to wounding (By similarity)	PF00305.17|Lipoxygenase|0|Lipoxygenase	Q9CAG3|LOX6_ARATH|-271.2|Lipoxygenase 6, chloroplastic OS=Arabidopsis thaliana GN=LOX6 PE=2 SV=1	XP_020250592.1|-10000.0|lipoxygenase 6, chloroplastic [Asparagus officinalis]
c250059_g1	cluster 1	1.50495	0.00083729	0.00787747	up	2.00875	4.19369e-05	0.00397901	up	1.56925	4.4758e-05	0.0173765	up	biological_process:glutathione biosynthetic process(GO:0006750);;biological_process:glutathione biosynthetic process(GO:0006750);;cellular_component:chloroplast(GO:0009507);;cellular_component:chloroplast(GO:0009507);;cellular_component:plastid(GO:0009536);;molecular_function:ligase activity(GO:0016874);;molecular_function:nucleotide binding(GO:0000166);;molecular_function:glutamate-cysteine liga…	egu:105044585|-241.2|K01919|gshA; glutamate--cysteine ligase [EC:6.3.2.2]|ko00480|Glutathione metabolism;;ko00270|Cysteine and methionine metabolism;;	4113.PGSC0003DMT400031827|-241.8|COG3572|H|glutamate--cysteine ligase	PF04107.11|GCS2|2.5e-94|Glutamate-cysteine ligase family 2(GCS2)	Q1W2L8|GSH1_TOBAC|-243.6|Glutamate--cysteine ligase, chloroplastic OS=Nicotiana tabacum GN=GSH1 PE=2 SV=2	AAL61610.1|-283.2|gamma-glutamylcysteine synthetase [Allium cepa]
c250820_g1	cluster 2	1.57761	0.00187106	0.0117859	up	1.48298	0.00179396	0.0123187	up	-	-	-	-	cellular_component:plastid(GO:0009536);;cellular_component:chloroplast inner membrane(GO:0009706);;molecular_function:oxaloacetate transmembrane transporter activity(GO:0015131);;molecular_function:alpha-ketoglutarate transmembrane transporter activity(GO:0015139);;molecular_function:malate transmembrane transporter activity(GO:0015140);;biological_process:oxaloacetate transport(GO:0015729);;biol…	-	3694.POPTR_0001s26580.1|-263.9|COG0471|P|Transporter	PF00939.17|Na_sulph_symp|1.7e-139|Sodium:sulfate symporter transmembrane region	Q9LXV3|DIT1_ARATH|-260.6|Dicarboxylate transporter 1, chloroplastic OS=Arabidopsis thaliana GN=DIT1 PE=1 SV=1	XP_002299910.2|-261.8|hypothetical protein POPTR_0001s26580g [Populus trichocarpa]
c250931_g1	cluster 1	2.46643	3.07797e-05	0.00327353	up	2.57965	0.000122236	0.0049531	up	1.95598	0.000109984	0.0192641	up	biological_process:aspartate metabolic process(GO:0006531);;biological_process:glutamate metabolic process(GO:0006536);;molecular_function:transaminase activity(GO:0008483);;cellular_component:amyloplast(GO:0009501);;cellular_component:amyloplast(GO:0009501);;cellular_component:chloroplast(GO:0009507);;cellular_component:chloroplast(GO:0009507);;cellular_component:plastid(GO:0009536);;molecular_f…	egu:105060235|-221.2|K00811|ASP5; aspartate aminotransferase, chloroplastic [EC:2.6.1.1]|ko00400|Phenylalanine, tyrosine and tryptophan biosynthesis;;ko00950|Isoquinoline alkaloid biosynthesis;;ko00350|Tyrosine metabolism;;ko00330|Arginine and proline metabolism;;ko01210|2-Oxocarboxylic acid metabolism;;ko01230|Biosynthesis of amino acids;;ko00250|Alanine, aspartate and glutamate metabolism;;ko00…	4641.GSMUA_Achr6P30270_001|-219.4|COG1448|E|aminotransferase	PF00155.19|Aminotran_1_2|3.5e-92|Aminotransferase class I and II	P46248|AAT5_ARATH|-211.7|Aspartate aminotransferase, chloroplastic OS=Arabidopsis thaliana GN=ASP5 PE=1 SV=2	XP_020240732.1|-223.1|aspartate aminotransferase, chloroplastic isoform X1 [Asparagus officinalis]
c251161_g1	cluster 1	2.00638	0.00155204	0.0106589	up	1.66939	0.00325009	0.0169863	up	-	-	-	-	-	-	39947.LOC_Os12g43520.1|-115.4|ENOG4111JC3|S|NA	-	-	XP_020256243.1|-127.4|haloacid dehalogenase-like hydrolase domain-containing protein At3g48420 [Asparagus officinalis]
c267132_g1	cluster 1	1.63347	0.00057587	0.00671637	up	1.43497	0.000760638	0.00849678	up	1.28218	0.00402916	0.0444011	up	cellular_component:chloroplast(GO:0009507);;cellular_component:plastid(GO:0009536);;molecular_function:antioxidant activity(GO:0016209);;molecular_function:oxidoreductase activity(GO:0016491);;biological_process:hydrogen peroxide catabolic process(GO:0042744);;biological_process:hydrogen peroxide catabolic process(GO:0042744);;molecular_function:peroxiredoxin activity(GO:0051920);;molecular_funct…	-	39947.LOC_Os02g33450.1|-108.2|COG0450|O|alkyl hydroperoxide reductase	-	Q6ER94|BAS1_ORYSJ|-109.4|2-Cys peroxiredoxin BAS1, chloroplastic OS=Oryza sativa subsp. japonica GN=BAS1 PE=1 SV=1	XP_020260407.1|-111.5|2-Cys peroxiredoxin BAS1, chloroplastic-like [Asparagus officinalis]
c267178_g1	cluster 2	2.19161	0.000997162	0.00852124	up	1.84163	0.00111036	0.0100058	up	-	-	-	-	cellular_component:chloroplast(GO:0009507);;cellular_component:chloroplast(GO:0009507);;cellular_component:plastid(GO:0009536);;molecular_function:oxidoreductase activity(GO:0016491);;biological_process:D-gluconate metabolic process(GO:0019521);;biological_process:oxidation-reduction process(GO:0055114);;molecular_function:phosphogluconate dehydrogenase (decarboxylating) activity(GO:0004616);;bio…	pda:103718335|-239.8|K00033|PGD, gnd, gntZ; 6-phosphogluconate dehydrogenase [EC:1.1.1.44 1.1.1.343]|ko01200|Carbon metabolism;;ko00480|Glutathione metabolism;;ko00030|Pentose phosphate pathway;;	3702.AT5G41670.1|-237.4|COG0362|G|Catalyzes the oxidative decarboxylation of 6- phosphogluconate to ribulose 5-phosphate and CO(2), with concomitant reduction of NADP to NADPH (By similarity)	PF00393.17|6PGD|7.6e-128|6-phosphogluconate dehydrogenase, C-terminal domain	Q9FFR3|6PGD2_ARATH|-238.6|6-phosphogluconate dehydrogenase, decarboxylating 2, chloroplastic OS=Arabidopsis thaliana GN=At5g41670 PE=1 SV=1	XP_008805334.1|-239.0|PREDICTED: LOW QUALITY PROTEIN: 6-phosphogluconate dehydrogenase, decarboxylating 1, chloroplastic-like [Phoenix dactylifera]
c267275_g1	cluster 2	1.45551	0.00217436	0.0127789	up	1.53822	0.00178248	0.0122775	up	-	-	-	-	molecular_function:DNA topoisomerase type II (ATP-hydrolyzing) activity(GO:0003918);;molecular_function:ATP binding(GO:0005524);;cellular_component:mitochondrion(GO:0005739);;cellular_component:mitochondrion(GO:0005739);;cellular_component:chloroplast(GO:0009507);;cellular_component:chloroplast(GO:0009507);;cellular_component:plastid(GO:0009536);;molecular_function:isomerase activity(GO:0016853);…	-	4555.Si034127m|-10000.0|COG0188|L|DNA gyrase negatively supercoils closed circular double- stranded DNA in an ATP-dependent manner and also catalyzes the interconversion of other topological isomers of double-stranded DNA rings, including catenanes and knotted rings (By similarity)	PF00521.18|DNA_topoisoIV|2.3e-153|DNA gyrase/topoisomerase IV, subunit A	Q5YLB5|GYRA_NICBE|-10000.0|DNA gyrase subunit A, chloroplastic/mitochondrial OS=Nicotiana benthamiana GN=GYRA PE=2 SV=1	XP_020274079.1|-10000.0|DNA gyrase subunit A, chloroplastic/mitochondrial [Asparagus officinalis]
c267298_g1	cluster 2	1.95802	0.000454159	0.00608165	up	1.36557	0.00103971	0.00972589	up	-	-	-	-	cellular_component:thylakoid(GO:0009579);;cellular_component:membrane(GO:0016020);;cellular_component:integral component of membrane(GO:0016021);;cellular_component:chloroplast(GO:0009507);;cellular_component:chloroplast thylakoid membrane(GO:0009535);;cellular_component:plastid(GO:0009536)	-	4641.GSMUA_Achr6P06810_001|-78.4|ENOG4111RV1|S|NA	-	Q8LDL0|HHL1_ARATH|-72.4|Protein HHL1, chloroplastic OS=Arabidopsis thaliana GN=HHL1 PE=1 SV=1	XP_008807203.1|-79.3|PREDICTED: protein HHL1, chloroplastic [Phoenix dactylifera]
c27016_g1	cluster 2	1.41993	0.000736655	0.00745401	up	1.40295	0.000726519	0.0083499	up	-	-	-	-	biological_process:pentose-phosphate shunt(GO:0006098);;cellular_component:chloroplast(GO:0009507);;cellular_component:chloroplast(GO:0009507);;cellular_component:plastid(GO:0009536);;molecular_function:oxidoreductase activity(GO:0016491);;biological_process:oxidation-reduction process(GO:0055114);;molecular_function:glucose-6-phosphate dehydrogenase activity(GO:0004345);;biological_process:carbo…	sbi:SORBI_06g003160|-241.0|K00036|G6PD, zwf; glucose-6-phosphate 1-dehydrogenase [EC:1.1.1.49 1.1.1.363]|ko01200|Carbon metabolism;;ko00480|Glutathione metabolism;;ko00030|Pentose phosphate pathway;;	4558.Sb06g003160.1|-242.3|COG0364|G|Glucose-6-phosphate 1-dehydrogenase	PF02781.14|G6PD_C|8.9e-112|Glucose-6-phosphate dehydrogenase, C-terminal domain	Q43793|G6PDC_TOBAC|-232.4|Glucose-6-phosphate 1-dehydrogenase, chloroplastic OS=Nicotiana tabacum PE=2 SV=1	XP_020261100.1|-244.7|glucose-6-phosphate 1-dehydrogenase, chloroplastic-like isoform X1 [Asparagus officinalis]
c2757_g1	cluster 1	2.7662	3.3798e-07	0.00169516	up	2.2655	9.44685e-06	0.00336618	up	1.71557	0.00190762	0.0335561	up	cellular_component:chloroplast(GO:0009507);;cellular_component:plastid(GO:0009536);;molecular_function:rRNA binding(GO:0019843);;cellular_component:intracellular ribonucleoprotein complex(GO:0030529);;molecular_function:RNA binding(GO:0003723);;cellular_component:ribosome(GO:0005840);;cellular_component:chloroplast(GO:0009507)	pop:POPTR_0013s06710g|-106.4|K02906|RP-L3, MRPL3, rplC; large subunit ribosomal protein L3|ko03010|Ribosome;;	4641.GSMUA_Achr8P06120_001|-107.5|COG0087|J|One of the primary rRNA binding proteins, it binds directly near the 3'-end of the 23S rRNA, where it nucleates assembly of the 50S subunit (By similarity)	-	O80360|RK3_TOBAC|-107.0|50S ribosomal protein L3, chloroplastic (Fragment) OS=Nicotiana tabacum GN=RPL3 PE=2 SV=1	XP_019187331.1|-106.2|PREDICTED: 50S ribosomal protein L3, chloroplastic [Ipomoea nil]
c284987_g1	cluster 4	1.82775	0.000702185	0.00728843	up	1.34737	0.00144236	0.0111488	up	-	-	-	-	cellular_component:chloroplast inner membrane(GO:0009706);;cellular_component:membrane(GO:0016020);;molecular_function:oxidoreductase activity(GO:0016491);;biological_process:oxidation-reduction process(GO:0055114);;cellular_component:chloroplast(GO:0009507);;cellular_component:plastid inner membrane(GO:0009528);;cellular_component:plastid(GO:0009536)	-	4081.Solyc09g059030.2.1|-128.1|COG0604|C|alcohol dehydrogenase	-	Q9SV68|QORH_ARATH|-123.3|Chloroplast envelope quinone oxidoreductase homolog OS=Arabidopsis thaliana GN=CEQORH PE=1 SV=1	XP_020572104.1|-133.0|putative quinone-oxidoreductase homolog, chloroplastic [Phalaenopsis equestris]
c285059_g1	cluster 1	4.41719	0.000135135	0.00412982	up	4.31124	0.000118101	0.00491379	up	3.70184	0.000364983	0.022144	up	-	-	4533.OB05G10850.1|-52.0|ENOG410YKVU|O|Tim17/Tim22/Tim23/Pmp24 family	-	-	XP_020244870.1|-56.8|outer envelope pore protein 16, chloroplastic [Asparagus officinalis]
[truncated: 5,358 more rows]

## Sheet: Sheet2
ID
c190095_g1	cluster 6
c187017_g1	cluster 6
c230868_g4	cluster 6
c232082_g2	cluster 6
c198041_g1	cluster 6
c202982_g1	cluster 6
c232342_g1	cluster 6
c210495_g1	cluster 6
c216419_g5	cluster 6
c210543_g1	cluster 6
c286026_g1	cluster 6
c130792_g2	cluster 6
c234949_g1	cluster 6
c43438_g2	cluster 6
c151462_g1	cluster 6
c218532_g2	cluster 6
c217950_g2	cluster 6
c220368_g5	cluster 6
c210078_g1	cluster 6
c221387_g1	cluster 6
c209316_g1	cluster 6
c210089_g1	cluster 6
c199413_g1	cluster 6
c222565_g1	cluster 6
c226216_g1	cluster 6
c190718_g1	cluster 6
c137201_g1	cluster 6
c201319_g1	cluster 6
c227435_g8	cluster 6
c176331_g1	cluster 6
c126230_g1	cluster 6
c198983_g1	cluster 6
c212138_g1	cluster 6
c222070_g2	cluster 6
c172729_g1	cluster 6
c285149_g1	cluster 6
c169619_g1	cluster 6
c227322_g5	cluster 6
c224369_g1	cluster 6
c219274_g1	cluster 6
c216566_g1	cluster 6
c39493_g1	cluster 6
[truncated: 456 more rows]
