# Supplementary material for: Comparative Transcriptome Analysis of Temperature-Induced Green Discoloration in Garlic
Source: Int J Genomics. 2018 Dec 2;2018:6725728. doi: 10.1155/2018/6725728 (PMC6304921; doi:10.1155/2018/6725728)
Supplement: Supplementary Materials — Supplementary data to this article can be found online and in Data Availability. 332 Supplementary Table S1: qRT-PCR primers of selected unigenes. 333 Supplementary Table S2: summary of transcriptome sequencing. 334 Supplementary Table S3: the function of unigenes annotated. 335 Supplementary Table S4: DEGs identified in three treatments. 336 Supplementary Table S5: GO terms enriched by DEGs. [file 6725728.f1.zip › Table S5-GO terms enriched by DEGs.xls]

## Sheet: DS1_Down
GO_accession	Description	GeneNames	Ontology	pValue	qValue	fg	bg	GO_level
GO:0006952	defense response	c100672_g1,c113841_g1,c144091_g1,c155953_g1,c188121_g1,c190186_g1,c196744_g1,c199309_g1,c199538_g1,c200275_g2,c205274_g1,c209306_g1,c212009_g1,c212806_g3,c214633_g1,c220973_g3,c223391_g2,c223391_g3,c223712_g3,c224701_g1,c224960_g1,c225186_g1,c225422_g2,c226320_g1,c226918_g1,c227294_g1,c227975_g1,c228439_g3,c231786_g1,c80299_g1	BP	1.4e-05	0.002226	30	349	4
GO:0009987	cellular process	c100946_g1,c101851_g1,c108857_g1,c109670_g1,c130530_g1,c137070_g1,c137673_g1,c144091_g1,c144132_g2,c148363_g1,c148363_g4,c149262_g1,c152182_g1,c153220_g1,c156326_g2,c158109_g1,c158760_g1,c162028_g1,c169422_g1,c169558_g1,c169660_g1,c169718_g1,c170672_g1,c171109_g1,c171256_g1,c172564_g1,c174811_g1,c174861_g1,c176626_g1,c177784_g3,c177784_g4,c178499_g1,c178706_g1,c179665_g1,c179680_g1,c180943_g1,c18…	BP	1.7e-05	0.0013515	190	4267	2
GO:0044237	cellular metabolic process	c100946_g1,c101851_g1,c109670_g1,c130530_g1,c137070_g1,c137673_g1,c144132_g2,c148363_g1,c148363_g4,c149262_g1,c152182_g1,c153220_g1,c156326_g2,c158760_g1,c162028_g1,c169422_g1,c169558_g1,c169660_g1,c169718_g1,c171109_g1,c171256_g1,c172564_g1,c174811_g1,c176626_g1,c177784_g3,c177784_g4,c178499_g1,c178706_g1,c179665_g1,c179680_g1,c180943_g1,c181135_g1,c183170_g1,c183801_g1,c184292_g1,c185518_g1,c18…	BP	0.00015	0.00795	163	3603	3
GO:0009607	response to biotic stimulus	c100672_g1,c113841_g1,c144091_g1,c155953_g1,c181135_g1,c188121_g1,c200275_g2,c205274_g1,c210307_g1,c214633_g1,c221095_g1,c223712_g3,c225186_g1,c226918_g1,c227294_g1	BP	0.00016	0.00636	15	136	3
GO:0006950	response to stress	c100672_g1,c113841_g1,c141087_g1,c144091_g1,c152182_g1,c155953_g1,c170672_g1,c181135_g1,c188121_g1,c190186_g1,c196744_g1,c199309_g1,c199538_g1,c200275_g2,c201128_g2,c205274_g1,c209306_g1,c210307_g1,c212009_g1,c212806_g3,c212969_g1,c214633_g1,c218321_g1,c220213_g3,c220412_g1,c220973_g3,c221095_g1,c223391_g2,c223391_g3,c223712_g3,c224701_g1,c224960_g1,c225186_g1,c225422_g2,c226320_g1,c226918_g1,c22…	BP	0.00034	0.010812	42	658	3
GO:0048518	positive regulation of biological process	c152182_g1,c170672_g1,c188121_g1,c197313_g1,c200275_g2,c204216_g1,c210307_g1,c214633_g1,c220412_g1,c221095_g1,c221224_g6,c223712_g3,c226918_g1,c227294_g1,c66653_g1	BP	0.00057	0.015105	15	153	2
GO:0006955	immune response	c144091_g1,c188121_g1,c199538_g1,c223712_g3,c225186_g1,c225422_g2,c226918_g1,c227975_g1,c80299_g1	BP	0.00071	0.015052	9	66	3
GO:0045087	innate immune response	c144091_g1,c188121_g1,c199538_g1,c223712_g3,c225186_g1,c225422_g2,c226918_g1,c227975_g1,c80299_g1	BP	0.00071	0.015052	9	66	4
GO:0002376	immune system process	c144091_g1,c188121_g1,c199538_g1,c223712_g3,c225186_g1,c225422_g2,c226918_g1,c227975_g1,c80299_g1	BP	0.00089	0.0157233	9	68	2
GO:0009816	defense response to bacterium, incompatible interaction	c144091_g1,c188121_g1,c225186_g1	BP	0.00095	0.015105	3	6	6
GO:0042127	regulation of cell proliferation	c152182_g1,c158109_g1,c226918_g1,c66653_g1	BP	0.00105	0.0151773	4	13	3
GO:0006351	transcription, DNA-templated	c101851_g1,c149262_g1,c152182_g1,c169718_g1,c176626_g1,c179665_g1,c181135_g1,c184292_g1,c186568_g1,c193956_g1,c193956_g2,c197313_g1,c197323_g1,c199073_g1,c199538_g1,c200275_g2,c203513_g1,c204216_g1,c205089_g10,c205096_g1,c205096_g2,c206048_g1,c206160_g1,c209991_g1,c214633_g1,c216396_g2,c217609_g1,c218321_g1,c220409_g2,c220412_g1,c221222_g1,c221224_g6,c221281_g5,c222408_g1,c226918_g1,c227582_g8,c2…	BP	0.00127	0.0161544	40	658	6
GO:0097659	nucleic acid-templated transcription	c101851_g1,c149262_g1,c152182_g1,c169718_g1,c176626_g1,c179665_g1,c181135_g1,c184292_g1,c186568_g1,c193956_g1,c193956_g2,c197313_g1,c197323_g1,c199073_g1,c199538_g1,c200275_g2,c203513_g1,c204216_g1,c205089_g10,c205096_g1,c205096_g2,c206048_g1,c206160_g1,c209991_g1,c214633_g1,c216396_g2,c217609_g1,c218321_g1,c220409_g2,c220412_g1,c221222_g1,c221224_g6,c221281_g5,c222408_g1,c226918_g1,c227582_g8,c2…	BP	0.00127	0.0161544	40	658	7
GO:0009814	defense response, incompatible interaction	c144091_g1,c188121_g1,c225186_g1,c226918_g1	BP	0.00143	0.0162407	4	14	5
GO:0032774	RNA biosynthetic process	c101851_g1,c149262_g1,c152182_g1,c169718_g1,c176626_g1,c179665_g1,c181135_g1,c184292_g1,c186568_g1,c193956_g1,c193956_g2,c197313_g1,c197323_g1,c199073_g1,c199538_g1,c200275_g2,c203513_g1,c204216_g1,c205089_g10,c205096_g1,c205096_g2,c206048_g1,c206160_g1,c209991_g1,c214633_g1,c216396_g2,c217609_g1,c218321_g1,c220409_g2,c220412_g1,c221222_g1,c221224_g6,c221281_g5,c222408_g1,c226918_g1,c227582_g8,c2…	BP	0.00155	0.01643	40	665	6
GO:0009266	response to temperature stimulus	c141087_g1,c170672_g1,c201128_g2,c210307_g1,c218321_g1,c220213_g3,c220412_g1,c221095_g1,c230878_g2	BP	0.00181	0.0179869	9	75	4
GO:0008283	cell proliferation	c152182_g1,c158109_g1,c226918_g1,c66653_g1	BP	0.00189	0.0176771	4	15	2
GO:0006355	regulation of transcription, DNA-templated	c101851_g1,c149262_g1,c152182_g1,c169718_g1,c176626_g1,c179665_g1,c181135_g1,c184292_g1,c186568_g1,c193956_g1,c193956_g2,c197313_g1,c197323_g1,c199073_g1,c199538_g1,c200275_g2,c203513_g1,c204216_g1,c205089_g10,c205096_g1,c205096_g2,c206048_g1,c206160_g1,c209991_g1,c214633_g1,c216396_g2,c217609_g1,c218321_g1,c220409_g2,c220412_g1,c221224_g6,c221281_g5,c222408_g1,c226918_g1,c227582_g8,c229930_g1,c2…	BP	0.00198	0.0165695	39	652	6
GO:1903506	regulation of nucleic acid-templated transcription	c101851_g1,c149262_g1,c152182_g1,c169718_g1,c176626_g1,c179665_g1,c181135_g1,c184292_g1,c186568_g1,c193956_g1,c193956_g2,c197313_g1,c197323_g1,c199073_g1,c199538_g1,c200275_g2,c203513_g1,c204216_g1,c205089_g10,c205096_g1,c205096_g2,c206048_g1,c206160_g1,c209991_g1,c214633_g1,c216396_g2,c217609_g1,c218321_g1,c220409_g2,c220412_g1,c221224_g6,c221281_g5,c222408_g1,c226918_g1,c227582_g8,c229930_g1,c2…	BP	0.00198	0.0165695	39	652	7
GO:2001141	regulation of RNA biosynthetic process	c101851_g1,c149262_g1,c152182_g1,c169718_g1,c176626_g1,c179665_g1,c181135_g1,c184292_g1,c186568_g1,c193956_g1,c193956_g2,c197313_g1,c197323_g1,c199073_g1,c199538_g1,c200275_g2,c203513_g1,c204216_g1,c205089_g10,c205096_g1,c205096_g2,c206048_g1,c206160_g1,c209991_g1,c214633_g1,c216396_g2,c217609_g1,c218321_g1,c220409_g2,c220412_g1,c221224_g6,c221281_g5,c222408_g1,c226918_g1,c227582_g8,c229930_g1,c2…	BP	0.00198	0.0165695	39	652	6
GO:0016070	RNA metabolic process	c101851_g1,c149262_g1,c152182_g1,c169718_g1,c174811_g1,c176626_g1,c178706_g1,c179665_g1,c181135_g1,c184292_g1,c186568_g1,c187930_g1,c193956_g1,c193956_g2,c197313_g1,c197323_g1,c199073_g1,c199464_g2,c199538_g1,c200275_g2,c201115_g1,c203513_g1,c204216_g1,c205089_g10,c205096_g1,c205096_g2,c206048_g1,c206160_g1,c209991_g1,c211332_g2,c212424_g5,c214633_g1,c216396_g2,c217609_g1,c218321_g1,c219526_g2,c2…	BP	0.00205	0.0155214	53	965	6
GO:0043207	response to external biotic stimulus	c144091_g1,c181135_g1,c188121_g1,c200275_g2,c205274_g1,c210307_g1,c214633_g1,c221095_g1,c223712_g3,c225186_g1,c226918_g1,c227294_g1	BP	0.00209	0.0147693	12	123	4
GO:0051707	response to other organism	c144091_g1,c181135_g1,c188121_g1,c200275_g2,c205274_g1,c210307_g1,c214633_g1,c221095_g1,c223712_g3,c225186_g1,c226918_g1,c227294_g1	BP	0.00209	0.0147693	12	123	3
GO:0051252	regulation of RNA metabolic process	c101851_g1,c149262_g1,c152182_g1,c169718_g1,c176626_g1,c179665_g1,c181135_g1,c184292_g1,c186568_g1,c193956_g1,c193956_g2,c197313_g1,c197323_g1,c199073_g1,c199538_g1,c200275_g2,c203513_g1,c204216_g1,c205089_g10,c205096_g1,c205096_g2,c206048_g1,c206160_g1,c209991_g1,c214633_g1,c216396_g2,c217609_g1,c218321_g1,c220409_g2,c220412_g1,c221224_g6,c221281_g5,c222408_g1,c226918_g1,c227582_g8,c229930_g1,c2…	BP	0.00247	0.0163637	39	660	5
GO:0050826	response to freezing	c170672_g1,c210307_g1,c221095_g1	BP	0.00252	0.0160272	3	8	5
GO:0010467	gene expression	c101851_g1,c144132_g2,c149262_g1,c152182_g1,c169718_g1,c172564_g1,c174811_g1,c176626_g1,c178706_g1,c179665_g1,c181135_g1,c184292_g1,c186568_g1,c187930_g1,c193956_g1,c193956_g2,c196744_g1,c197313_g1,c197323_g1,c199073_g1,c199464_g2,c199538_g1,c200275_g2,c201115_g1,c201128_g2,c203513_g1,c204216_g1,c205089_g10,c205096_g1,c205096_g2,c206048_g1,c206160_g1,c207464_g2,c209991_g1,c210869_g1,c211332_g2,c2…	BP	0.00274	0.0167562	60	1140	5
GO:0048519	negative regulation of biological process	c152182_g1,c158109_g1,c196744_g1,c197313_g1,c200275_g2,c205274_g1,c214633_g1,c220412_g1,c221224_g6,c224701_g1,c226918_g1,c227582_g8,c227975_g1,c228620_g2,c231222_g1,c66653_g1,c80299_g1	BP	0.0029	0.0170778	17	216	2
GO:0019219	regulation of nucleobase-containing compound metabolic process	c101851_g1,c149262_g1,c152182_g1,c169718_g1,c176626_g1,c179665_g1,c181135_g1,c184292_g1,c186568_g1,c193956_g1,c193956_g2,c197313_g1,c197323_g1,c199073_g1,c199538_g1,c200275_g2,c203513_g1,c204216_g1,c205089_g10,c205096_g1,c205096_g2,c206048_g1,c206160_g1,c209991_g1,c214633_g1,c216396_g2,c217609_g1,c218321_g1,c220409_g2,c220412_g1,c221224_g6,c221281_g5,c222408_g1,c226918_g1,c227582_g8,c229930_g1,c2…	BP	0.00306	0.0173764	39	668	5
GO:0050789	regulation of biological process	c101851_g1,c149262_g1,c152182_g1,c156326_g2,c158109_g1,c169718_g1,c170672_g1,c174861_g1,c176626_g1,c179665_g1,c181135_g1,c184292_g1,c186568_g1,c188121_g1,c193956_g1,c193956_g2,c196744_g1,c197313_g1,c197323_g1,c199073_g1,c199538_g1,c200275_g2,c203513_g1,c204216_g1,c205089_g10,c205096_g1,c205096_g2,c205274_g1,c205898_g2,c206048_g1,c206160_g1,c206962_g1,c207464_g2,c209991_g1,c210307_g1,c211218_g1,c2…	BP	0.00309	0.0169417	64	1240	2
GO:0009617	response to bacterium	c144091_g1,c181135_g1,c188121_g1,c205274_g1,c210307_g1,c214633_g1,c221095_g1,c223712_g3,c225186_g1	BP	0.00366	0.019398	9	83	4
GO:0010468	regulation of gene expression	c101851_g1,c149262_g1,c152182_g1,c169718_g1,c176626_g1,c179665_g1,c181135_g1,c184292_g1,c186568_g1,c193956_g1,c193956_g2,c196744_g1,c197313_g1,c197323_g1,c199073_g1,c199538_g1,c200275_g2,c203513_g1,c204216_g1,c205089_g10,c205096_g1,c205096_g2,c206048_g1,c206160_g1,c207464_g2,c209991_g1,c214633_g1,c216396_g2,c217609_g1,c218321_g1,c220409_g2,c220412_g1,c221224_g6,c221281_g5,c222408_g1,c226918_g1,c2…	BP	0.00369	0.0189261	43	764	5
GO:2000112	regulation of cellular macromolecule biosynthetic process	c101851_g1,c149262_g1,c152182_g1,c169718_g1,c176626_g1,c179665_g1,c181135_g1,c184292_g1,c186568_g1,c193956_g1,c193956_g2,c197313_g1,c197323_g1,c199073_g1,c199538_g1,c200275_g2,c203513_g1,c204216_g1,c205089_g10,c205096_g1,c205096_g2,c206048_g1,c206160_g1,c207464_g2,c209991_g1,c214633_g1,c216396_g2,c217609_g1,c218321_g1,c220409_g2,c220412_g1,c221224_g6,c221281_g5,c222408_g1,c226918_g1,c227582_g8,c2…	BP	0.00385	0.0191297	40	699	6
GO:0010556	regulation of macromolecule biosynthetic process	c101851_g1,c149262_g1,c152182_g1,c169718_g1,c176626_g1,c179665_g1,c181135_g1,c184292_g1,c186568_g1,c193956_g1,c193956_g2,c197313_g1,c197323_g1,c199073_g1,c199538_g1,c200275_g2,c203513_g1,c204216_g1,c205089_g10,c205096_g1,c205096_g2,c206048_g1,c206160_g1,c207464_g2,c209991_g1,c214633_g1,c216396_g2,c217609_g1,c218321_g1,c220409_g2,c220412_g1,c221224_g6,c221281_g5,c222408_g1,c226918_g1,c227582_g8,c2…	BP	0.00395	0.0190318	40	700	5
GO:0061077	chaperone-mediated protein folding	c144091_g1,c225186_g1	BP	0.00409	0.0191268	2	3	4
GO:0048584	positive regulation of response to stimulus	c170672_g1,c188121_g1,c200275_g2,c204216_g1,c214633_g1,c223712_g3,c226918_g1	BP	0.00458	0.0208063	7	56	3
GO:0031349	positive regulation of defense response	c188121_g1,c200275_g2,c214633_g1,c223712_g3,c226918_g1	BP	0.00467	0.0206258	5	30	4
GO:0031326	regulation of cellular biosynthetic process	c101851_g1,c149262_g1,c152182_g1,c169718_g1,c176626_g1,c179665_g1,c181135_g1,c184292_g1,c186568_g1,c193956_g1,c193956_g2,c197313_g1,c197323_g1,c199073_g1,c199538_g1,c200275_g2,c203513_g1,c204216_g1,c205089_g10,c205096_g1,c205096_g2,c206048_g1,c206160_g1,c207464_g2,c209991_g1,c214633_g1,c216396_g2,c217609_g1,c218321_g1,c220409_g2,c220412_g1,c221224_g6,c221281_g5,c222408_g1,c226918_g1,c227582_g8,c2…	BP	0.00506	0.0217443	40	710	5
GO:0009889	regulation of biosynthetic process	c101851_g1,c149262_g1,c152182_g1,c169718_g1,c176626_g1,c179665_g1,c181135_g1,c184292_g1,c186568_g1,c193956_g1,c193956_g2,c197313_g1,c197323_g1,c199073_g1,c199538_g1,c200275_g2,c203513_g1,c204216_g1,c205089_g10,c205096_g1,c205096_g2,c206048_g1,c206160_g1,c207464_g2,c209991_g1,c214633_g1,c216396_g2,c217609_g1,c218321_g1,c220409_g2,c220412_g1,c221224_g6,c221281_g5,c222408_g1,c226918_g1,c227582_g8,c2…	BP	0.00518	0.0216742	40	711	4
GO:0060255	regulation of macromolecule metabolic process	c101851_g1,c149262_g1,c152182_g1,c169718_g1,c176626_g1,c179665_g1,c181135_g1,c184292_g1,c186568_g1,c193956_g1,c193956_g2,c196744_g1,c197313_g1,c197323_g1,c199073_g1,c199538_g1,c200275_g2,c203513_g1,c204216_g1,c205089_g10,c205096_g1,c205096_g2,c206048_g1,c206160_g1,c207464_g2,c209991_g1,c214633_g1,c216396_g2,c217609_g1,c218321_g1,c220409_g2,c220412_g1,c221224_g6,c221281_g5,c222408_g1,c226918_g1,c2…	BP	0.00538	0.0219338	43	780	4
GO:0051171	regulation of nitrogen compound metabolic process	c101851_g1,c149262_g1,c152182_g1,c169718_g1,c176626_g1,c179665_g1,c181135_g1,c184292_g1,c186568_g1,c193956_g1,c193956_g2,c197313_g1,c197323_g1,c199073_g1,c199538_g1,c200275_g2,c203513_g1,c204216_g1,c205089_g10,c205096_g1,c205096_g2,c206048_g1,c206160_g1,c207464_g2,c209991_g1,c214633_g1,c216396_g2,c217609_g1,c218321_g1,c220409_g2,c220412_g1,c221224_g6,c221281_g5,c222408_g1,c226918_g1,c227582_g8,c2…	BP	0.0057	0.0226575	40	715	4
GO:0008152	metabolic process	c100946_g1,c101851_g1,c108857_g1,c109670_g1,c130530_g1,c137070_g1,c137673_g1,c144132_g2,c148363_g1,c148363_g4,c149262_g1,c152182_g1,c153220_g1,c155953_g1,c156326_g2,c158760_g1,c162028_g1,c169422_g1,c169558_g1,c169660_g1,c169718_g1,c170672_g1,c171109_g1,c171256_g1,c172564_g1,c174811_g1,c176155_g1,c176626_g1,c177784_g3,c177784_g4,c178499_g1,c178706_g1,c179665_g1,c179680_g1,c179931_g1,c180943_g1,c18…	BP	0.00575	0.0222988	200	4881	2
GO:0019222	regulation of metabolic process	c101851_g1,c149262_g1,c152182_g1,c169718_g1,c176626_g1,c179665_g1,c181135_g1,c184292_g1,c186568_g1,c193956_g1,c193956_g2,c196744_g1,c197313_g1,c197323_g1,c199073_g1,c199538_g1,c200275_g2,c203513_g1,c204216_g1,c205089_g10,c205096_g1,c205096_g2,c206048_g1,c206160_g1,c207464_g2,c209991_g1,c214633_g1,c216396_g2,c217609_g1,c218321_g1,c220409_g2,c220412_g1,c221224_g6,c221281_g5,c222408_g1,c226918_g1,c2…	BP	0.00581	0.021995	44	806	3
GO:0065007	biological regulation	c101851_g1,c149262_g1,c152182_g1,c156326_g2,c158109_g1,c169718_g1,c170672_g1,c174861_g1,c176626_g1,c179665_g1,c181135_g1,c184292_g1,c186568_g1,c188121_g1,c193956_g1,c193956_g2,c196744_g1,c197313_g1,c197323_g1,c199073_g1,c199538_g1,c200275_g2,c201297_g1,c203513_g1,c204216_g1,c205089_g10,c205096_g1,c205096_g2,c205274_g1,c205898_g2,c206048_g1,c206160_g1,c206962_g1,c207464_g2,c209991_g1,c210307_g1,c2…	BP	0.00644	0.023813	67	1351	2
GO:0031323	regulation of cellular metabolic process	c101851_g1,c149262_g1,c152182_g1,c169718_g1,c176626_g1,c179665_g1,c181135_g1,c184292_g1,c186568_g1,c193956_g1,c193956_g2,c197313_g1,c197323_g1,c199073_g1,c199538_g1,c200275_g2,c203513_g1,c204216_g1,c205089_g10,c205096_g1,c205096_g2,c206048_g1,c206160_g1,c207464_g2,c209991_g1,c214633_g1,c216396_g2,c217609_g1,c218321_g1,c220409_g2,c220412_g1,c221224_g6,c221281_g5,c222408_g1,c226918_g1,c227294_g1,c2…	BP	0.00649	0.0234525	41	743	4
GO:0046283	anthocyanin-containing compound metabolic process	c152182_g1,c226918_g1,c229914_g1	BP	0.00684	0.024168	3	11	4
GO:0009409	response to cold	c170672_g1,c201128_g2,c210307_g1,c220213_g3,c220412_g1,c221095_g1	BP	0.00691	0.0238846	6	46	4
GO:0002833	positive regulation of response to biotic stimulus	c188121_g1,c200275_g2,c214633_g1,c223712_g3	BP	0.00694	0.0232307	4	21	4
GO:0043902	positive regulation of multi-organism process	c188121_g1,c200275_g2,c214633_g1,c223712_g3	BP	0.00694	0.0232307	4	21	3
GO:0080090	regulation of primary metabolic process	c101851_g1,c149262_g1,c152182_g1,c169718_g1,c176626_g1,c179665_g1,c181135_g1,c184292_g1,c186568_g1,c193956_g1,c193956_g2,c197313_g1,c197323_g1,c199073_g1,c199538_g1,c200275_g2,c203513_g1,c204216_g1,c205089_g10,c205096_g1,c205096_g2,c206048_g1,c206160_g1,c207464_g2,c209991_g1,c214633_g1,c216396_g2,c217609_g1,c218321_g1,c220409_g2,c220412_g1,c221224_g6,c221281_g5,c222408_g1,c226918_g1,c227582_g8,c2…	BP	0.0072	0.0233633	40	725	4
GO:0009892	negative regulation of metabolic process	c152182_g1,c196744_g1,c197313_g1,c200275_g2,c214633_g1,c220412_g1,c221224_g6,c226918_g1,c227582_g8,c228620_g2,c231222_g1,c66653_g1	BP	0.00794	0.0252492	12	145	3
GO:0006457	protein folding	c144091_g1,c225186_g1	BP	0.00797	0.0243698	2	4	3
GO:0008285	negative regulation of cell proliferation	c158109_g1,c66653_g1	BP	0.00797	0.0243698	2	4	3
GO:0031538	negative regulation of anthocyanin metabolic process	c152182_g1,c226918_g1	BP	0.00797	0.0243698	2	4	4
GO:0032103	positive regulation of response to external stimulus	c188121_g1,c200275_g2,c214633_g1,c223712_g3	BP	0.00824	0.0242622	4	22	4
GO:0019438	aromatic compound biosynthetic process	c100946_g1,c101851_g1,c149262_g1,c152182_g1,c158760_g1,c162028_g1,c169718_g1,c176626_g1,c179665_g1,c181135_g1,c184292_g1,c186568_g1,c193956_g1,c193956_g2,c197313_g1,c197323_g1,c199073_g1,c199538_g1,c200275_g2,c203513_g1,c204216_g1,c205089_g10,c205096_g1,c205096_g2,c206048_g1,c206160_g1,c209991_g1,c214633_g1,c216396_g2,c217609_g1,c218321_g1,c220344_g3,c220409_g2,c220412_g1,c221222_g1,c221224_g6,c2…	BP	0.00949	0.0274347	50	968	5
GO:0098542	defense response to other organism	c144091_g1,c188121_g1,c200275_g2,c205274_g1,c214633_g1,c223712_g3,c225186_g1,c226918_g1,c227294_g1	BP	0.01079	0.0306359	9	98	4
GO:0050896	response to stimulus	c100672_g1,c101851_g1,c113841_g1,c141087_g1,c144091_g1,c152182_g1,c155953_g1,c170672_g1,c174861_g1,c181135_g1,c188121_g1,c190186_g1,c196744_g1,c199309_g1,c199538_g1,c200275_g2,c201128_g2,c203513_g1,c204216_g1,c205096_g1,c205274_g1,c205898_g2,c206962_g1,c209306_g1,c210307_g1,c211218_g1,c212009_g1,c212806_g3,c212969_g1,c214633_g1,c214701_g1,c217460_g1,c218321_g1,c220213_g3,c220412_g1,c220973_g3,c22…	BP	0.01091	0.0301685	53	1046	2
GO:1901362	organic cyclic compound biosynthetic process	c100946_g1,c101851_g1,c149262_g1,c152182_g1,c158760_g1,c162028_g1,c169718_g1,c176626_g1,c179665_g1,c181135_g1,c184292_g1,c186568_g1,c193956_g1,c193956_g2,c197313_g1,c197323_g1,c199073_g1,c199538_g1,c200275_g2,c203513_g1,c204216_g1,c205089_g10,c205096_g1,c205096_g2,c206048_g1,c206160_g1,c209991_g1,c214633_g1,c216396_g2,c217609_g1,c217911_g1,c218321_g1,c220344_g3,c220409_g2,c220412_g1,c221222_g1,c2…	BP	0.01091	0.0301685	53	1046	5
GO:0009605	response to external stimulus	c144091_g1,c181135_g1,c188121_g1,c200275_g2,c203513_g1,c204216_g1,c205274_g1,c210307_g1,c214633_g1,c221095_g1,c223712_g3,c225186_g1,c226918_g1,c227294_g1	BP	0.01265	0.0340907	14	192	3
GO:0008284	positive regulation of cell proliferation	c152182_g1,c226918_g1	BP	0.01295	0.0337549	2	5	3
GO:0015976	carbon utilization	c152182_g1,c285304_g1	BP	0.01295	0.0337549	2	5	2
GO:0043609	regulation of carbon utilization	c152182_g1,c285304_g1	BP	0.01295	0.0337549	2	5	3
GO:0016567	protein ubiquitination	c148363_g1,c148363_g4,c153220_g1,c169558_g1,c169660_g1,c177784_g3,c177784_g4,c180943_g1,c185518_g1,c194970_g1,c199863_g1,c208651_g1,c218321_g1,c221481_g1,c224705_g2,c226309_g2,c226930_g4,c230532_g2	BP	0.01405	0.0354595	18	274	9
GO:1901698	response to nitrogen compound	c181135_g1,c205898_g2,c214701_g1,c223712_g3,c228620_g2	BP	0.01437	0.0357005	5	39	4
GO:0010243	response to organonitrogen compound	c181135_g1,c205898_g2,c214701_g1,c223712_g3	BP	0.01498	0.0366434	4	26	5
GO:0070647	protein modification by small protein conjugation or removal	c148363_g1,c148363_g4,c153220_g1,c169558_g1,c169660_g1,c177784_g3,c177784_g4,c180943_g1,c185518_g1,c194970_g1,c199863_g1,c208651_g1,c212965_g3,c218321_g1,c221481_g1,c224705_g2,c226309_g2,c226930_g4,c230532_g2	BP	0.01528	0.0368109	19	297	7
GO:0051187	cofactor catabolic process	c197233_g1,c211663_g2,c215086_g7,c225503_g1,c230956_g1	BP	0.01594	0.0378278	5	40	5
GO:1900426	positive regulation of defense response to bacterium	c188121_g1,c214633_g1,c223712_g3	BP	0.01689	0.0394928	3	15	4
GO:0031407	oxylipin metabolic process	c209294_g1,c226586_g1,c228956_g1,c230416_g2	BP	0.01708	0.0390751	4	27	6
GO:0031408	oxylipin biosynthetic process	c209294_g1,c226586_g1,c228956_g1,c230416_g2	BP	0.01708	0.0390751	4	27	7
GO:0042743	hydrogen peroxide metabolic process	c211663_g2,c215086_g7,c225503_g1,c227294_g1,c230956_g1	BP	0.01762	0.0394589	5	41	5
GO:0090304	nucleic acid metabolic process	c101851_g1,c149262_g1,c152182_g1,c169718_g1,c174811_g1,c176626_g1,c178706_g1,c179665_g1,c181135_g1,c184292_g1,c186568_g1,c187930_g1,c193956_g1,c193956_g2,c197313_g1,c197323_g1,c199073_g1,c199464_g2,c199538_g1,c200275_g2,c201115_g1,c203513_g1,c204216_g1,c205089_g10,c205096_g1,c205096_g2,c206048_g1,c206160_g1,c209991_g1,c211332_g2,c212424_g5,c212969_g1,c214024_g1,c214633_g1,c216396_g2,c217609_g1,c2…	BP	0.01846	0.0407658	55	1124	5
GO:0000060	protein import into nucleus, translocation	c210307_g1,c221095_g1	BP	0.01895	0.0376631	2	6	6
GO:0006606	protein import into nucleus	c210307_g1,c221095_g1	BP	0.01895	0.0376631	2	6	6
GO:0009625	response to insect	c210307_g1,c221095_g1	BP	0.01895	0.0376631	2	6	4
GO:0031537	regulation of anthocyanin metabolic process	c152182_g1,c226918_g1	BP	0.01895	0.0376631	2	6	5
GO:0033158	regulation of protein import into nucleus, translocation	c210307_g1,c221095_g1	BP	0.01895	0.0376631	2	6	7
GO:0033160	positive regulation of protein import into nucleus, translocation	c210307_g1,c221095_g1	BP	0.01895	0.0376631	2	6	6
GO:0042306	regulation of protein import into nucleus	c210307_g1,c221095_g1	BP	0.01895	0.0376631	2	6	7
GO:0042307	positive regulation of protein import into nucleus	c210307_g1,c221095_g1	BP	0.01895	0.0376631	2	6	5
GO:0042537	benzene-containing compound metabolic process	c100946_g1,c230536_g2	BP	0.01895	0.0376631	2	6	5
GO:0046822	regulation of nucleocytoplasmic transport	c210307_g1,c221095_g1	BP	0.01895	0.0376631	2	6	6
GO:0046824	positive regulation of nucleocytoplasmic transport	c210307_g1,c221095_g1	BP	0.01895	0.0376631	2	6	5
GO:0051170	import into nucleus	c210307_g1,c221095_g1	BP	0.01895	0.0376631	2	6	7
GO:1900180	regulation of protein localization to nucleus	c210307_g1,c221095_g1	BP	0.01895	0.0376631	2	6	6
GO:1900182	positive regulation of protein localization to nucleus	c210307_g1,c221095_g1	BP	0.01895	0.0376631	2	6	4
GO:1904591	positive regulation of protein import	c210307_g1,c221095_g1	BP	0.01895	0.0376631	2	6	5
GO:0031347	regulation of defense response	c188121_g1,c200275_g2,c214633_g1,c223712_g3,c226918_g1,c80299_g1	BP	0.01906	0.034438	6	57	5
GO:0043412	macromolecule modification	c148363_g1,c148363_g4,c153220_g1,c169422_g1,c169558_g1,c169660_g1,c177784_g3,c177784_g4,c180943_g1,c185518_g1,c194970_g1,c197313_g1,c199863_g1,c200275_g2,c206048_g1,c208353_g1,c208651_g1,c212009_g1,c212965_g3,c213410_g2,c218321_g1,c220412_g1,c221222_g1,c221224_g6,c221481_g1,c223712_g3,c224705_g2,c226309_g2,c226867_g3,c226930_g4,c227582_g8,c230532_g2,c73788_g1	BP	0.01933	0.0345334	33	611	5
GO:0010941	regulation of cell death	c205274_g1,c227294_g1,c227975_g1	BP	0.02023	0.0357397	3	16	4
GO:0034645	cellular macromolecule biosynthetic process	c101851_g1,c144132_g2,c149262_g1,c152182_g1,c169422_g1,c169718_g1,c172564_g1,c176626_g1,c179665_g1,c181135_g1,c184292_g1,c186568_g1,c193956_g1,c193956_g2,c197313_g1,c197323_g1,c199073_g1,c199538_g1,c200275_g2,c201128_g2,c203513_g1,c204216_g1,c205089_g10,c205096_g1,c205096_g2,c206048_g1,c206160_g1,c207464_g2,c209991_g1,c210869_g1,c213410_g2,c214024_g1,c214633_g1,c216099_g1,c216396_g2,c217609_g1,c2…	BP	0.02098	0.0366574	49	988	5
GO:0042737	drug catabolic process	c199907_g1,c209679_g1,c211663_g2,c215086_g7,c225503_g1,c225538_g7,c228425_g1,c230956_g1	BP	0.02139	0.0369675	8	92	5
GO:0032446	protein modification by small protein conjugation	c148363_g1,c148363_g4,c153220_g1,c169558_g1,c169660_g1,c177784_g3,c177784_g4,c180943_g1,c185518_g1,c194970_g1,c199863_g1,c208651_g1,c218321_g1,c221481_g1,c224705_g2,c226309_g2,c226930_g4,c230532_g2	BP	0.02154	0.0368265	18	287	8
GO:0080134	regulation of response to stress	c170672_g1,c188121_g1,c200275_g2,c214633_g1,c223712_g3,c226918_g1,c80299_g1	BP	0.02158	0.0365023	7	75	4
GO:0043170	macromolecule metabolic process	c101851_g1,c144132_g2,c148363_g1,c148363_g4,c149262_g1,c152182_g1,c153220_g1,c169422_g1,c169558_g1,c169660_g1,c169718_g1,c172564_g1,c174811_g1,c176626_g1,c177784_g3,c177784_g4,c178706_g1,c179665_g1,c180943_g1,c181135_g1,c184292_g1,c185518_g1,c186568_g1,c187930_g1,c193956_g1,c193956_g2,c194970_g1,c196744_g1,c197313_g1,c197323_g1,c199073_g1,c199464_g2,c199538_g1,c199863_g1,c199907_g1,c200275_g2,c20…	BP	0.02208	0.0369549	101	2286	4
GO:0016310	phosphorylation	c109670_g1,c137070_g1,c158760_g1,c169660_g1,c171256_g1,c178499_g1,c179680_g1,c183801_g1,c190186_g1,c190478_g1,c199309_g1,c200275_g2,c205244_g1,c205966_g1,c208856_g1,c209306_g1,c210307_g1,c212009_g1,c212806_g3,c214701_g1,c215387_g2,c215597_g5,c217578_g1,c217807_g7,c220503_g1,c220756_g1,c221095_g1,c222203_g1,c223712_g3,c224200_g3,c224960_g1,c226320_g1,c227294_g1,c228400_g1,c228439_g3,c230056_g2,c23…	BP	0.02294	0.0379944	43	851	6
GO:0044260	cellular macromolecule metabolic process	c101851_g1,c144132_g2,c148363_g1,c148363_g4,c149262_g1,c152182_g1,c153220_g1,c169422_g1,c169558_g1,c169660_g1,c169718_g1,c172564_g1,c176626_g1,c177784_g3,c177784_g4,c179665_g1,c180943_g1,c181135_g1,c184292_g1,c185518_g1,c186568_g1,c193956_g1,c193956_g2,c194970_g1,c197313_g1,c197323_g1,c199073_g1,c199538_g1,c199863_g1,c200275_g2,c201128_g2,c203513_g1,c204216_g1,c205089_g10,c205096_g1,c205096_g2,c2…	BP	0.02304	0.0377666	71	1530	4
GO:0010629	negative regulation of gene expression	c196744_g1,c197313_g1,c200275_g2,c214633_g1,c220412_g1,c221224_g6,c227582_g8,c228620_g2,c231222_g1,c66653_g1	BP	0.0235	0.0381276	10	130	5
GO:0042398	cellular modified amino acid biosynthetic process	c137673_g1,c183170_g1,c229555_g4	BP	0.0239	0.0383848	3	17	6
GO:0017038	protein import	c210307_g1,c221095_g1	BP	0.02589	0.0393924	2	7	6
GO:0032388	positive regulation of intracellular transport	c210307_g1,c221095_g1	BP	0.02589	0.0393924	2	7	4
GO:0046898	response to cycloheximide	c181135_g1,c214701_g1	BP	0.02589	0.0393924	2	7	5
GO:0051222	positive regulation of protein transport	c210307_g1,c221095_g1	BP	0.02589	0.0393924	2	7	4
GO:0060548	negative regulation of cell death	c205274_g1,c227975_g1	BP	0.02589	0.0393924	2	7	4
GO:0090316	positive regulation of intracellular protein transport	c210307_g1,c221095_g1	BP	0.02589	0.0393924	2	7	4
GO:1901654	response to ketone	c181135_g1,c214701_g1	BP	0.02589	0.0393924	2	7	5
GO:1903829	positive regulation of cellular protein localization	c210307_g1,c221095_g1	BP	0.02589	0.0393924	2	7	3
GO:1904589	regulation of protein import	c210307_g1,c221095_g1	BP	0.02589	0.0393924	2	7	7
GO:1904951	positive regulation of establishment of protein localization	c210307_g1,c221095_g1	BP	0.02589	0.0393924	2	7	3
GO:0072330	monocarboxylic acid biosynthetic process	c100946_g1,c130530_g1,c137673_g1,c158760_g1,c171109_g1,c197215_g1,c209294_g1,c211198_g1,c218051_g1,c226586_g1,c228956_g1,c230416_g2,c230536_g2	BP	0.02659	0.0384346	13	191	7
GO:0009408	response to heat	c141087_g1,c170672_g1,c218321_g1,c230878_g2	BP	0.02727	0.0390624	4	31	4
GO:0072593	reactive oxygen species metabolic process	c211663_g2,c215086_g7,c225503_g1,c227294_g1,c230956_g1	BP	0.02774	0.0393809	5	46	4
GO:0006633	fatty acid biosynthetic process	c130530_g1,c171109_g1,c209294_g1,c211198_g1,c218051_g1,c226586_g1,c228956_g1,c230416_g2	BP	0.02835	0.0398907	8	97	6
GO:0034654	nucleobase-containing compound biosynthetic process	c101851_g1,c149262_g1,c152182_g1,c158760_g1,c162028_g1,c169718_g1,c176626_g1,c179665_g1,c181135_g1,c184292_g1,c186568_g1,c193956_g1,c193956_g2,c197313_g1,c197323_g1,c199073_g1,c199538_g1,c200275_g2,c203513_g1,c204216_g1,c205089_g10,c205096_g1,c205096_g2,c206048_g1,c206160_g1,c209991_g1,c214633_g1,c216396_g2,c217609_g1,c218321_g1,c220409_g2,c220412_g1,c221222_g1,c221224_g6,c221281_g5,c222408_g1,c2…	BP	0.0302	0.0421211	42	843	5
GO:0042742	defense response to bacterium	c144091_g1,c188121_g1,c205274_g1,c214633_g1,c223712_g3,c225186_g1	BP	0.03177	0.0439255	6	64	5
GO:0042744	hydrogen peroxide catabolic process	c211663_g2,c215086_g7,c225503_g1,c230956_g1	BP	0.03347	0.045877	4	33	6
GO:0006022	aminoglycan metabolic process	c199907_g1,c209679_g1	BP	0.03367	0.0421538	2	8	5
GO:0006026	aminoglycan catabolic process	c199907_g1,c209679_g1	BP	0.03367	0.0421538	2	8	6
GO:0006030	chitin metabolic process	c199907_g1,c209679_g1	BP	0.03367	0.0421538	2	8	5
GO:0006032	chitin catabolic process	c199907_g1,c209679_g1	BP	0.03367	0.0421538	2	8	6
GO:0006913	nucleocytoplasmic transport	c210307_g1,c221095_g1	BP	0.03367	0.0421538	2	8	6
GO:0032386	regulation of intracellular transport	c210307_g1,c221095_g1	BP	0.03367	0.0421538	2	8	5
GO:0032880	regulation of protein localization	c210307_g1,c221095_g1	BP	0.03367	0.0421538	2	8	4
GO:0033157	regulation of intracellular protein transport	c210307_g1,c221095_g1	BP	0.03367	0.0421538	2	8	6
GO:0034504	protein localization to nucleus	c210307_g1,c221095_g1	BP	0.03367	0.0421538	2	8	7
GO:0046348	amino sugar catabolic process	c199907_g1,c209679_g1	BP	0.03367	0.0421538	2	8	6
GO:0051169	nuclear transport	c210307_g1,c221095_g1	BP	0.03367	0.0421538	2	8	5
GO:0051223	regulation of protein transport	c210307_g1,c221095_g1	BP	0.03367	0.0421538	2	8	6
GO:0060341	regulation of cellular localization	c210307_g1,c221095_g1	BP	0.03367	0.0421538	2	8	4
GO:0060992	response to fungicide	c181135_g1,c214701_g1	BP	0.03367	0.0421538	2	8	5
GO:0070201	regulation of establishment of protein localization	c210307_g1,c221095_g1	BP	0.03367	0.0421538	2	8	5
GO:0090087	regulation of peptide transport	c210307_g1,c221095_g1	BP	0.03367	0.0421538	2	8	5
GO:1901002	positive regulation of response to salt stress	c170672_g1,c188121_g1	BP	0.03367	0.0421538	2	8	4
GO:1901071	glucosamine-containing compound metabolic process	c199907_g1,c209679_g1	BP	0.03367	0.0421538	2	8	6
GO:1901072	glucosamine-containing compound catabolic process	c199907_g1,c209679_g1	BP	0.03367	0.0421538	2	8	7
GO:1901136	carbohydrate derivative catabolic process	c199907_g1,c209679_g1	BP	0.03367	0.0421538	2	8	5
GO:1903827	regulation of cellular protein localization	c210307_g1,c221095_g1	BP	0.03367	0.0421538	2	8	5
GO:0010605	negative regulation of macromolecule metabolic process	c196744_g1,c197313_g1,c200275_g2,c214633_g1,c220412_g1,c221224_g6,c227582_g8,c228620_g2,c231222_g1,c66653_g1	BP	0.03372	0.0388513	10	138	4
GO:0009059	macromolecule biosynthetic process	c101851_g1,c144132_g2,c149262_g1,c152182_g1,c169422_g1,c169718_g1,c172564_g1,c176626_g1,c179665_g1,c181135_g1,c184292_g1,c186568_g1,c193956_g1,c193956_g2,c197313_g1,c197323_g1,c199073_g1,c199538_g1,c200275_g2,c201128_g2,c203513_g1,c204216_g1,c205089_g10,c205096_g1,c205096_g2,c206048_g1,c206160_g1,c207464_g2,c209991_g1,c210869_g1,c213410_g2,c214024_g1,c214633_g1,c216099_g1,c216396_g2,c217609_g1,c2…	BP	0.03418	0.039098	49	1018	5
GO:0071704	organic substance metabolic process	c100946_g1,c101851_g1,c130530_g1,c137673_g1,c144132_g2,c148363_g1,c148363_g4,c149262_g1,c152182_g1,c153220_g1,c156326_g2,c158760_g1,c162028_g1,c169422_g1,c169558_g1,c169660_g1,c169718_g1,c170672_g1,c171109_g1,c172564_g1,c174811_g1,c176626_g1,c177784_g3,c177784_g4,c178706_g1,c179665_g1,c180943_g1,c181135_g1,c183170_g1,c184292_g1,c185518_g1,c186568_g1,c187930_g1,c193956_g1,c193956_g2,c194970_g1,c19…	BP	0.03425	0.0388982	144	3458	3
GO:0050794	regulation of cellular process	c101851_g1,c149262_g1,c152182_g1,c158109_g1,c169718_g1,c174861_g1,c176626_g1,c179665_g1,c181135_g1,c184292_g1,c186568_g1,c188121_g1,c193956_g1,c193956_g2,c197313_g1,c197323_g1,c199073_g1,c199538_g1,c200275_g2,c203513_g1,c204216_g1,c205089_g10,c205096_g1,c205096_g2,c205274_g1,c205898_g2,c206048_g1,c206160_g1,c206962_g1,c207464_g2,c209991_g1,c211218_g1,c214633_g1,c215875_g1,c216396_g2,c217609_g1,c2…	BP	0.03451	0.0389155	51	1067	3
GO:0097305	response to alcohol	c152182_g1,c181135_g1,c188121_g1,c203513_g1,c211218_g1,c214701_g1,c217460_g1,c220213_g3,c226918_g1	BP	0.03546	0.0397052	9	120	5
GO:0008219	cell death	c205274_g1,c225422_g2,c227294_g1,c227975_g1	BP	0.03686	0.0408414	4	34	3
GO:0019318	hexose metabolic process	c158760_g1,c169422_g1,c229223_g1,c285304_g1	BP	0.03686	0.0408414	4	34	5
GO:0009628	response to abiotic stimulus	c141087_g1,c170672_g1,c181135_g1,c188121_g1,c201128_g2,c203513_g1,c204216_g1,c210307_g1,c214633_g1,c214701_g1,c218321_g1,c220213_g3,c220412_g1,c221095_g1,c230878_g2	BP	0.03978	0.0436208	15	244	3
GO:0048583	regulation of response to stimulus	c152182_g1,c170672_g1,c188121_g1,c200275_g2,c203513_g1,c204216_g1,c214633_g1,c223712_g3,c226918_g1,c80299_g1	BP	0.03985	0.0433983	10	142	3
GO:0009698	phenylpropanoid metabolic process	c100946_g1,c224701_g1,c225648_g5,c230536_g2	BP	0.04043	0.0434349	4	35	4
GO:0017001	antibiotic catabolic process	c211663_g2,c215086_g7,c225503_g1,c230956_g1	BP	0.04043	0.0434349	4	35	5
GO:0045814	negative regulation of gene expression, epigenetic	c200275_g2,c220412_g1,c221224_g6	BP	0.04191	0.0444246	3	21	6
GO:0006749	glutathione metabolic process	c183170_g1,c197233_g1	BP	0.04224	0.0443311	2	9	5
GO:0051050	positive regulation of transport	c210307_g1,c221095_g1	BP	0.04224	0.0443311	2	9	3
GO:0006464	cellular protein modification process	c148363_g1,c148363_g4,c153220_g1,c169422_g1,c169558_g1,c169660_g1,c177784_g3,c177784_g4,c180943_g1,c185518_g1,c194970_g1,c199863_g1,c208651_g1,c212009_g1,c212965_g3,c213410_g2,c218321_g1,c220412_g1,c221481_g1,c223712_g3,c224705_g2,c226309_g2,c226930_g4,c230532_g2,c73788_g1	BP	0.04414	0.0457216	25	468	6
GO:0036211	protein modification process	c148363_g1,c148363_g4,c153220_g1,c169422_g1,c169558_g1,c169660_g1,c177784_g3,c177784_g4,c180943_g1,c185518_g1,c194970_g1,c199863_g1,c208651_g1,c212009_g1,c212965_g3,c213410_g2,c218321_g1,c220412_g1,c221481_g1,c223712_g3,c224705_g2,c226309_g2,c226930_g4,c230532_g2,c73788_g1	BP	0.04414	0.0457216	25	468	5
GO:0051704	multi-organism process	c144091_g1,c174451_g1,c181135_g1,c188121_g1,c200275_g2,c205274_g1,c210307_g1,c214633_g1,c221095_g1,c223712_g3,c225186_g1,c226918_g1,c227294_g1	BP	0.0449	0.0460587	13	206	2
GO:0044271	cellular nitrogen compound biosynthetic process	c101851_g1,c137673_g1,c144132_g2,c149262_g1,c152182_g1,c158760_g1,c162028_g1,c169718_g1,c172564_g1,c176626_g1,c179665_g1,c181135_g1,c183170_g1,c184292_g1,c186568_g1,c193956_g1,c193956_g2,c197313_g1,c197323_g1,c199073_g1,c199538_g1,c200275_g2,c201128_g2,c203513_g1,c204216_g1,c205089_g10,c205096_g1,c205096_g2,c206048_g1,c206160_g1,c207464_g2,c209991_g1,c210869_g1,c214633_g1,c216396_g2,c217609_g1,c2…	BP	0.04531	0.0461813	52	1110	5
GO:0009699	phenylpropanoid biosynthetic process	c100946_g1,c224701_g1,c230536_g2	BP	0.04722	0.0478215	3	22	5
GO:0006631	fatty acid metabolic process	c130530_g1,c171109_g1,c209294_g1,c211198_g1,c212904_g2,c217278_g1,c218051_g1,c226586_g1,c228956_g1,c230416_g2	BP	0.04855	0.0488573	10	147	5
GO:0018130	heterocycle biosynthetic process	c101851_g1,c149262_g1,c152182_g1,c158760_g1,c162028_g1,c169718_g1,c176626_g1,c179665_g1,c181135_g1,c184292_g1,c186568_g1,c193956_g1,c193956_g2,c197313_g1,c197323_g1,c199073_g1,c199538_g1,c200275_g2,c203513_g1,c204216_g1,c205089_g10,c205096_g1,c205096_g2,c206048_g1,c206160_g1,c209991_g1,c214633_g1,c216396_g2,c217609_g1,c218321_g1,c220344_g3,c220409_g2,c220412_g1,c221222_g1,c221224_g6,c221281_g5,c2…	BP	0.04881	0.04881	46	969	5
GO:0005488	binding	c100672_g1,c101851_g1,c109670_g1,c130530_g1,c137070_g1,c137673_g1,c137756_g1,c144091_g1,c144132_g2,c148363_g1,c148363_g4,c149262_g1,c152182_g1,c169422_g1,c169558_g1,c169660_g1,c169718_g1,c171256_g1,c172564_g1,c174451_g1,c174811_g1,c176155_g1,c176626_g1,c177784_g3,c177784_g4,c178499_g1,c178706_g1,c179279_g2,c179665_g1,c179680_g1,c180943_g1,c181135_g1,c183170_g1,c183801_g1,c183951_g1,c186568_g1,c18…	MF	0.00013	0.00533	209	4520	2
GO:0043167	ion binding	c109670_g1,c130530_g1,c137070_g1,c137673_g1,c137756_g1,c144091_g1,c144132_g2,c148363_g1,c148363_g4,c169422_g1,c169558_g1,c169660_g1,c169718_g1,c171256_g1,c172564_g1,c174451_g1,c176155_g1,c177784_g3,c177784_g4,c178499_g1,c178706_g1,c179680_g1,c180943_g1,c183170_g1,c183801_g1,c183951_g1,c187384_g1,c187930_g1,c188121_g1,c190186_g1,c190478_g1,c190681_g1,c193956_g1,c193956_g2,c194970_g1,c197215_g1,c19…	MF	0.00045	0.009225	162	3356	3
GO:0030554	adenyl nucleotide binding	c109670_g1,c130530_g1,c137070_g1,c137673_g1,c137756_g1,c144091_g1,c169660_g1,c171256_g1,c174451_g1,c177784_g3,c177784_g4,c178499_g1,c178706_g1,c179680_g1,c183170_g1,c183801_g1,c187384_g1,c190186_g1,c190478_g1,c199309_g1,c200275_g2,c201154_g1,c202570_g2,c205244_g1,c205274_g1,c205966_g1,c207838_g1,c208353_g1,c208493_g1,c208856_g1,c209148_g1,c209306_g1,c210307_g1,c212009_g1,c212806_g3,c212969_g1,c21…	MF	0.00071	0.00831714	93	1729	6
GO:0032559	adenyl ribonucleotide binding	c109670_g1,c130530_g1,c137070_g1,c137673_g1,c137756_g1,c144091_g1,c169660_g1,c171256_g1,c174451_g1,c177784_g3,c177784_g4,c178499_g1,c178706_g1,c179680_g1,c183170_g1,c183801_g1,c187384_g1,c190186_g1,c190478_g1,c199309_g1,c200275_g2,c201154_g1,c202570_g2,c205244_g1,c205274_g1,c205966_g1,c207838_g1,c208353_g1,c208493_g1,c208856_g1,c209148_g1,c209306_g1,c210307_g1,c212009_g1,c212806_g3,c212969_g1,c21…	MF	0.00071	0.00831714	93	1729	6
GO:0008144	drug binding	c109670_g1,c130530_g1,c137070_g1,c137673_g1,c137756_g1,c144091_g1,c169660_g1,c171256_g1,c174451_g1,c177784_g3,c177784_g4,c178499_g1,c178706_g1,c179680_g1,c183170_g1,c183801_g1,c187384_g1,c190186_g1,c190478_g1,c199309_g1,c200275_g2,c201154_g1,c202570_g2,c205244_g1,c205274_g1,c205966_g1,c207838_g1,c208353_g1,c208493_g1,c208856_g1,c209148_g1,c209306_g1,c209679_g1,c210307_g1,c212009_g1,c212806_g3,c21…	MF	0.00074	0.006068	93	1731	3
GO:0043168	anion binding	c109670_g1,c130530_g1,c137070_g1,c137673_g1,c137756_g1,c144091_g1,c144132_g2,c169660_g1,c171256_g1,c172564_g1,c174451_g1,c177784_g3,c177784_g4,c178499_g1,c178706_g1,c179680_g1,c183170_g1,c183801_g1,c183951_g1,c187384_g1,c188121_g1,c190186_g1,c190478_g1,c199309_g1,c200275_g2,c200960_g1,c201128_g2,c201154_g1,c202570_g2,c205244_g1,c205274_g1,c205966_g1,c207838_g1,c208353_g1,c208493_g1,c208612_g1,c20…	MF	0.0008	0.00546667	103	1964	4
GO:0005524	ATP binding	c109670_g1,c130530_g1,c137070_g1,c137673_g1,c137756_g1,c144091_g1,c169660_g1,c171256_g1,c174451_g1,c177784_g3,c177784_g4,c178499_g1,c178706_g1,c179680_g1,c183170_g1,c183801_g1,c187384_g1,c190186_g1,c190478_g1,c199309_g1,c200275_g2,c201154_g1,c202570_g2,c205244_g1,c205274_g1,c205966_g1,c207838_g1,c208353_g1,c208493_g1,c208856_g1,c209148_g1,c209306_g1,c210307_g1,c212009_g1,c212806_g3,c212969_g1,c21…	MF	0.00089	0.00521286	92	1717	4
GO:0005544	calcium-dependent phospholipid binding	c208612_g1,c77158_g1,c91450_g1	MF	0.00117	0.00599625	3	6	5
GO:0030246	carbohydrate binding	c178499_g1,c179680_g1,c199309_g1,c205244_g1,c220756_g1,c222203_g1,c223391_g2,c223391_g3,c227294_g1,c231786_g1	MF	0.00153	0.00697	10	82	3
GO:0004674	protein serine/threonine kinase activity	c109670_g1,c137070_g1,c169660_g1,c171256_g1,c178499_g1,c179680_g1,c183801_g1,c190186_g1,c190478_g1,c199309_g1,c205244_g1,c205966_g1,c208856_g1,c209306_g1,c210307_g1,c212009_g1,c212806_g3,c214701_g1,c215387_g2,c215597_g5,c217578_g1,c217807_g7,c220503_g1,c220756_g1,c221095_g1,c222203_g1,c223712_g3,c224200_g3,c226320_g1,c227294_g1,c228400_g1,c228439_g3,c230056_g2,c230504_g2,c230703_g2,c230720_g1,c23…	MF	0.00177	0.007257	39	603	5
GO:0005543	phospholipid binding	c188121_g1,c208612_g1,c77158_g1,c91450_g1	MF	0.00185	0.00689545	4	14	4
GO:0097367	carbohydrate derivative binding	c109670_g1,c130530_g1,c137070_g1,c137673_g1,c137756_g1,c144091_g1,c144132_g2,c169660_g1,c171256_g1,c172564_g1,c174451_g1,c177784_g3,c177784_g4,c178499_g1,c178706_g1,c179680_g1,c183170_g1,c183801_g1,c183951_g1,c187384_g1,c190186_g1,c190478_g1,c199309_g1,c200275_g2,c201128_g2,c201154_g1,c202570_g2,c205244_g1,c205274_g1,c205966_g1,c207838_g1,c208353_g1,c208493_g1,c208856_g1,c209148_g1,c209306_g1,c20…	MF	0.00191	0.00652583	99	1918	3
GO:0017076	purine nucleotide binding	c109670_g1,c130530_g1,c137070_g1,c137673_g1,c137756_g1,c144091_g1,c144132_g2,c169660_g1,c171256_g1,c172564_g1,c174451_g1,c177784_g3,c177784_g4,c178499_g1,c178706_g1,c179680_g1,c183170_g1,c183801_g1,c183951_g1,c187384_g1,c190186_g1,c190478_g1,c199309_g1,c200275_g2,c201128_g2,c201154_g1,c202570_g2,c205244_g1,c205274_g1,c205966_g1,c207838_g1,c208353_g1,c208493_g1,c208856_g1,c209148_g1,c209306_g1,c21…	MF	0.00255	0.00774444	98	1911	5
GO:0032555	purine ribonucleotide binding	c109670_g1,c130530_g1,c137070_g1,c137673_g1,c137756_g1,c144091_g1,c144132_g2,c169660_g1,c171256_g1,c172564_g1,c174451_g1,c177784_g3,c177784_g4,c178499_g1,c178706_g1,c179680_g1,c183170_g1,c183801_g1,c183951_g1,c187384_g1,c190186_g1,c190478_g1,c199309_g1,c200275_g2,c201128_g2,c201154_g1,c202570_g2,c205244_g1,c205274_g1,c205966_g1,c207838_g1,c208353_g1,c208493_g1,c208856_g1,c209148_g1,c209306_g1,c21…	MF	0.00255	0.00774444	98	1911	5
GO:0032553	ribonucleotide binding	c109670_g1,c130530_g1,c137070_g1,c137673_g1,c137756_g1,c144091_g1,c144132_g2,c169660_g1,c171256_g1,c172564_g1,c174451_g1,c177784_g3,c177784_g4,c178499_g1,c178706_g1,c179680_g1,c183170_g1,c183801_g1,c183951_g1,c187384_g1,c190186_g1,c190478_g1,c199309_g1,c200275_g2,c201128_g2,c201154_g1,c202570_g2,c205244_g1,c205274_g1,c205966_g1,c207838_g1,c208353_g1,c208493_g1,c208856_g1,c209148_g1,c209306_g1,c21…	MF	0.0026	0.00710667	98	1912	4
GO:0036094	small molecule binding	c109670_g1,c130530_g1,c137070_g1,c137673_g1,c137756_g1,c144091_g1,c144132_g2,c169660_g1,c171256_g1,c172564_g1,c174451_g1,c177784_g3,c177784_g4,c178499_g1,c178706_g1,c179680_g1,c183170_g1,c183801_g1,c183951_g1,c187384_g1,c190186_g1,c190478_g1,c199309_g1,c200275_g2,c200960_g1,c201128_g2,c201154_g1,c202570_g2,c205244_g1,c205274_g1,c205966_g1,c207838_g1,c208353_g1,c208493_g1,c208856_g1,c209148_g1,c20…	MF	0.00265	0.00679062	101	1983	3
GO:0035639	purine ribonucleoside triphosphate binding	c109670_g1,c130530_g1,c137070_g1,c137673_g1,c137756_g1,c144091_g1,c144132_g2,c169660_g1,c171256_g1,c172564_g1,c174451_g1,c177784_g3,c177784_g4,c178499_g1,c178706_g1,c179680_g1,c183170_g1,c183801_g1,c183951_g1,c187384_g1,c190186_g1,c190478_g1,c199309_g1,c200275_g2,c201128_g2,c201154_g1,c202570_g2,c205244_g1,c205274_g1,c205966_g1,c207838_g1,c208353_g1,c208493_g1,c208856_g1,c209148_g1,c209306_g1,c21…	MF	0.00311	0.00750059	97	1899	5
GO:0004672	protein kinase activity	c109670_g1,c137070_g1,c169660_g1,c171256_g1,c178499_g1,c179680_g1,c183801_g1,c190186_g1,c190478_g1,c199309_g1,c205244_g1,c205966_g1,c208856_g1,c209306_g1,c210307_g1,c212009_g1,c212806_g3,c214701_g1,c215387_g2,c215597_g5,c217578_g1,c217807_g7,c220503_g1,c220756_g1,c221095_g1,c222203_g1,c223712_g3,c224200_g3,c226320_g1,c227294_g1,c228400_g1,c228439_g3,c230056_g2,c230504_g2,c230703_g2,c230720_g1,c23…	MF	0.00346	0.00788111	39	626	4
GO:0005516	calmodulin binding	c100672_g1,c178499_g1,c179665_g1,c179680_g1,c202408_g1,c205244_g1,c214633_g1,c215875_g1,c217825_g2,c220756_g1,c222203_g1,c223488_g1	MF	0.00348	0.00750947	12	122	4
GO:0016881	acid-amino acid ligase activity	c137673_g1,c183170_g1,c229555_g4	MF	0.00449	0.0092045	3	9	5
GO:1901363	heterocyclic compound binding	c101851_g1,c109670_g1,c130530_g1,c137070_g1,c137673_g1,c137756_g1,c144091_g1,c144132_g2,c149262_g1,c169660_g1,c169718_g1,c171256_g1,c172564_g1,c174451_g1,c174811_g1,c176626_g1,c177784_g3,c177784_g4,c178499_g1,c178706_g1,c179665_g1,c179680_g1,c183170_g1,c183801_g1,c183951_g1,c186568_g1,c187384_g1,c190186_g1,c190478_g1,c190681_g1,c193956_g1,c193956_g2,c196744_g1,c197323_g1,c199073_g1,c199309_g1,c19…	MF	0.00465	0.00907857	135	2831	3
GO:0097159	organic cyclic compound binding	c101851_g1,c109670_g1,c130530_g1,c137070_g1,c137673_g1,c137756_g1,c144091_g1,c144132_g2,c149262_g1,c169660_g1,c169718_g1,c171256_g1,c172564_g1,c174451_g1,c174811_g1,c176626_g1,c177784_g3,c177784_g4,c178499_g1,c178706_g1,c179665_g1,c179680_g1,c183170_g1,c183801_g1,c183951_g1,c186568_g1,c187384_g1,c190186_g1,c190478_g1,c190681_g1,c193956_g1,c193956_g2,c196744_g1,c197323_g1,c199073_g1,c199309_g1,c19…	MF	0.00516	0.00961636	135	2838	3
GO:0000166	nucleotide binding	c109670_g1,c130530_g1,c137070_g1,c137673_g1,c137756_g1,c144091_g1,c144132_g2,c169660_g1,c171256_g1,c172564_g1,c174451_g1,c177784_g3,c177784_g4,c178499_g1,c178706_g1,c179680_g1,c183170_g1,c183801_g1,c183951_g1,c187384_g1,c190186_g1,c190478_g1,c199309_g1,c200275_g2,c201128_g2,c201154_g1,c202570_g2,c205244_g1,c205274_g1,c205966_g1,c207838_g1,c208353_g1,c208493_g1,c208856_g1,c209148_g1,c209306_g1,c21…	MF	0.00545	0.00950851	98	1956	4
GO:1901265	nucleoside phosphate binding	c109670_g1,c130530_g1,c137070_g1,c137673_g1,c137756_g1,c144091_g1,c144132_g2,c169660_g1,c171256_g1,c172564_g1,c174451_g1,c177784_g3,c177784_g4,c178499_g1,c178706_g1,c179680_g1,c183170_g1,c183801_g1,c183951_g1,c187384_g1,c190186_g1,c190478_g1,c199309_g1,c200275_g2,c201128_g2,c201154_g1,c202570_g2,c205244_g1,c205274_g1,c205966_g1,c207838_g1,c208353_g1,c208493_g1,c208856_g1,c209148_g1,c209306_g1,c21…	MF	0.00545	0.00950851	98	1956	4
GO:0016846	carbon-sulfur lyase activity	c200421_g1,c211787_g1,c221387_g1,c223137_g5,c231957_g1	MF	0.00629	0.0103156	5	30	4
GO:0033764	steroid dehydrogenase activity, acting on the CH-OH group of donors, NAD or NADP as acceptor	c217911_g1,c226008_g1	MF	0.00914	0.0141411	2	4	5
GO:0070524	11-beta-hydroxysteroid dehydrogenase (NADP+) activity	c217911_g1,c226008_g1	MF	0.00914	0.0141411	2	4	6
GO:0051213	dioxygenase activity	c197215_g1,c197313_g1,c201297_g1,c209294_g1,c221224_g6,c226586_g1,c228956_g1,c230416_g2	MF	0.00925	0.0135446	8	74	4
GO:0008289	lipid binding	c179279_g2,c188121_g1,c200960_g1,c208612_g1,c222514_g6,c249905_g1,c77158_g1,c91450_g1	MF	0.01	0.0141379	8	75	3
GO:0019783	ubiquitin-like protein-specific protease activity	c200623_g2,c200623_g3,c202211_g1,c211192_g1,c212965_g3	MF	0.01368	0.018696	5	36	7
GO:0004652	polynucleotide adenylyltransferase activity	c223158_g2,c223158_g3	MF	0.01483	0.0196139	2	5	7
GO:0016840	carbon-nitrogen lyase activity	c100946_g1,c197233_g1,c230536_g2	MF	0.01678	0.0211686	3	14	4
GO:0047654	alliin lyase activity	c211787_g1,c221387_g1,c231957_g1	MF	0.01678	0.0211686	3	14	5
GO:0016841	ammonia-lyase activity	c100946_g1,c230536_g2	MF	0.02166	0.0261194	2	6	5
GO:0016773	phosphotransferase activity, alcohol group as acceptor	c109670_g1,c137070_g1,c169660_g1,c171256_g1,c178499_g1,c179680_g1,c183801_g1,c190186_g1,c190478_g1,c199309_g1,c205244_g1,c205966_g1,c208856_g1,c209306_g1,c210307_g1,c212009_g1,c212806_g3,c214701_g1,c215387_g2,c215597_g5,c217578_g1,c217807_g7,c220503_g1,c220756_g1,c221095_g1,c222203_g1,c223712_g3,c224200_g3,c226320_g1,c227294_g1,c228400_g1,c228439_g3,c230056_g2,c230504_g2,c230703_g2,c230720_g1,c23…	MF	0.02649	0.0310311	40	734	5
GO:0036459	thiol-dependent ubiquitinyl hydrolase activity	c200623_g2,c200623_g3,c202211_g1,c211192_g1	MF	0.03065	0.0344288	4	30	5
GO:0101005	ubiquitinyl hydrolase activity	c200623_g2,c200623_g3,c202211_g1,c211192_g1	MF	0.03065	0.0344288	4	30	4
GO:0016229	steroid dehydrogenase activity	c217911_g1,c226008_g1	MF	0.03833	0.0413561	2	8	4
GO:0016301	kinase activity	c109670_g1,c137070_g1,c169660_g1,c171256_g1,c178499_g1,c179680_g1,c183801_g1,c190186_g1,c190478_g1,c199309_g1,c200275_g2,c205244_g1,c205274_g1,c205966_g1,c208856_g1,c209306_g1,c210307_g1,c212009_g1,c212806_g3,c214701_g1,c215387_g2,c215597_g5,c217578_g1,c217807_g7,c220503_g1,c220756_g1,c221095_g1,c222203_g1,c223712_g3,c224200_g3,c224960_g1,c226320_g1,c227294_g1,c228400_g1,c228439_g3,c230056_g2,c23…	MF	0.03953	0.0415572	43	822	5
GO:0016772	transferase activity, transferring phosphorus-containing groups	c109670_g1,c137070_g1,c169660_g1,c171256_g1,c178499_g1,c179680_g1,c183801_g1,c190186_g1,c190478_g1,c196744_g1,c199309_g1,c200275_g2,c205244_g1,c205274_g1,c205966_g1,c208856_g1,c209306_g1,c210056_g2,c210307_g1,c212009_g1,c212806_g3,c214701_g1,c215387_g2,c215597_g5,c217578_g1,c217807_g7,c220503_g1,c220756_g1,c221095_g1,c221444_g1,c222203_g1,c223158_g2,c223158_g3,c223712_g3,c224200_g3,c224960_g1,c22…	MF	0.03957	0.0405592	50	979	4
GO:0005681	spliceosomal complex	c174811_g1,c187930_g1,c199538_g1,c201115_g1,c211332_g2,c212424_g5,c224992_g1,c231311_g3	CC	0.0027	0.0243	8	68	5
GO:0030904	retromer complex	c179279_g2,c222514_g6	CC	0.0037	0.01665	2	3	3
GO:0005634	nucleus	c101851_g1,c149262_g1,c152182_g1,c169558_g1,c169718_g1,c174811_g1,c176626_g1,c178706_g1,c179665_g1,c180943_g1,c181135_g1,c184292_g1,c186568_g1,c187930_g1,c188121_g1,c193956_g1,c193956_g2,c197313_g1,c197323_g1,c199073_g1,c199464_g2,c199538_g1,c200275_g2,c200623_g2,c200623_g3,c200960_g1,c201115_g1,c202408_g1,c203513_g1,c204216_g1,c205089_g10,c205096_g1,c206048_g1,c206160_g1,c207838_g1,c208353_g1,c2…	CC	0.0039	0.0117	77	1644	5
GO:0016604	nuclear body	c200275_g2,c201115_g1,c211332_g2,c212424_g5,c212965_g3,c220412_g1,c224992_g1	CC	0.0042	0.00945	7	58	6
GO:0016607	nuclear speck	c201115_g1,c211332_g2,c212424_g5,c212965_g3,c220412_g1,c224992_g1	CC	0.0082	0.01476	6	50	7
GO:0044451	nucleoplasm part	c200275_g2,c201115_g1,c211332_g2,c212424_g5,c212965_g3,c220412_g1,c221281_g5,c224992_g1,c229930_g1	CC	0.0137	0.02055	9	107	5
GO:0033588	Elongator holoenzyme complex	c152182_g1,c226918_g1	CC	0.0172	0.0221143	2	6	3
GO:0005654	nucleoplasm	c181135_g1,c200275_g2,c201115_g1,c211332_g2,c212424_g5,c212965_g3,c220412_g1,c221281_g5,c224992_g1,c229930_g1	CC	0.0208	0.0234	10	134	5
GO:0005811	lipid droplet	c217911_g1,c226008_g1	CC	0.047	0.047	2	10	5

## Sheet: DS2_Down
GO_accession	Description	GeneNames	Ontology	pValue	qValue	fg	bg	GO_level
GO:0006952	defense response	c100672_g1,c113841_g1,c144091_g1,c155953_g1,c188121_g1,c190186_g1,c196744_g1,c199309_g1,c199538_g1,c200275_g2,c205274_g1,c209306_g1,c212009_g1,c212806_g3,c214633_g1,c220973_g3,c223391_g3,c223712_g3,c224960_g1,c225186_g1,c225422_g2,c226320_g1,c227294_g1,c228439_g3,c231786_g1,c80299_g1	BP	1.3e-05	0.001963	26	349	4
GO:0009607	response to biotic stimulus	c100672_g1,c113841_g1,c144091_g1,c155953_g1,c181135_g1,c188121_g1,c200275_g2,c205274_g1,c210307_g1,c214633_g1,c221095_g1,c223712_g3,c225186_g1,c227294_g1	BP	4.9e-05	0.0036995	14	136	3
GO:0009987	cellular process	c100946_g1,c101851_g1,c108857_g1,c109670_g1,c130530_g1,c137070_g1,c137673_g1,c144091_g1,c148363_g4,c149262_g1,c153220_g1,c156326_g2,c158109_g1,c158760_g1,c162028_g1,c169660_g1,c169718_g1,c170672_g1,c171109_g1,c171256_g1,c174811_g1,c174861_g1,c176626_g1,c177784_g4,c178499_g1,c178706_g1,c179665_g1,c180943_g1,c181135_g1,c183170_g1,c183801_g1,c184292_g1,c186568_g1,c187384_g1,c187930_g1,c188121_g1,c19…	BP	5.2e-05	0.00261733	153	4267	2
GO:0044237	cellular metabolic process	c100946_g1,c101851_g1,c109670_g1,c130530_g1,c137070_g1,c137673_g1,c148363_g4,c149262_g1,c153220_g1,c156326_g2,c158760_g1,c162028_g1,c169660_g1,c169718_g1,c171109_g1,c171256_g1,c174811_g1,c176626_g1,c177784_g4,c178499_g1,c178706_g1,c179665_g1,c180943_g1,c181135_g1,c183170_g1,c183801_g1,c184292_g1,c186568_g1,c187930_g1,c190186_g1,c190478_g1,c193956_g1,c193956_g2,c197215_g1,c197233_g1,c197313_g1,c19…	BP	0.00014	0.005285	133	3603	3
GO:0006950	response to stress	c100672_g1,c113841_g1,c141087_g1,c144091_g1,c155953_g1,c170672_g1,c181135_g1,c188121_g1,c190186_g1,c196744_g1,c199309_g1,c199538_g1,c200275_g2,c201128_g2,c205274_g1,c209306_g1,c210307_g1,c212009_g1,c212806_g3,c212969_g1,c214633_g1,c218321_g1,c220213_g3,c220973_g3,c221095_g1,c223391_g3,c223712_g3,c224960_g1,c225186_g1,c225422_g2,c226320_g1,c227294_g1,c228439_g3,c230878_g2,c231786_g1,c80299_g1	BP	0.00022	0.006644	36	658	3
GO:0009816	defense response to bacterium, incompatible interaction	c144091_g1,c188121_g1,c225186_g1	BP	0.00049	0.0123317	3	6	6
GO:0009617	response to bacterium	c144091_g1,c181135_g1,c188121_g1,c205274_g1,c210307_g1,c214633_g1,c221095_g1,c223712_g3,c225186_g1	BP	0.00077	0.01661	9	83	4
GO:0043207	response to external biotic stimulus	c144091_g1,c181135_g1,c188121_g1,c200275_g2,c205274_g1,c210307_g1,c214633_g1,c221095_g1,c223712_g3,c225186_g1,c227294_g1	BP	0.00107	0.0190082	11	123	4
GO:0051707	response to other organism	c144091_g1,c181135_g1,c188121_g1,c200275_g2,c205274_g1,c210307_g1,c214633_g1,c221095_g1,c223712_g3,c225186_g1,c227294_g1	BP	0.00107	0.0190082	11	123	3
GO:0016070	RNA metabolic process	c101851_g1,c149262_g1,c169718_g1,c174811_g1,c176626_g1,c178706_g1,c179665_g1,c181135_g1,c184292_g1,c186568_g1,c187930_g1,c193956_g1,c193956_g2,c197313_g1,c199073_g1,c199464_g2,c199538_g1,c200275_g2,c201115_g1,c203513_g1,c204216_g1,c205089_g10,c205096_g1,c205096_g2,c206160_g1,c209991_g1,c211332_g2,c212424_g5,c214633_g1,c216396_g2,c217609_g1,c218321_g1,c219526_g2,c220409_g2,c221222_g1,c221224_g6,c2…	BP	0.00121	0.018271	45	965	6
GO:0050826	response to freezing	c170672_g1,c210307_g1,c221095_g1	BP	0.00132	0.01812	3	8	5
GO:0009266	response to temperature stimulus	c141087_g1,c170672_g1,c201128_g2,c210307_g1,c218321_g1,c220213_g3,c221095_g1,c230878_g2	BP	0.00168	0.02114	8	75	4
GO:0006351	transcription, DNA-templated	c101851_g1,c149262_g1,c169718_g1,c176626_g1,c179665_g1,c181135_g1,c184292_g1,c186568_g1,c193956_g1,c193956_g2,c197313_g1,c199073_g1,c199538_g1,c200275_g2,c203513_g1,c204216_g1,c205089_g10,c205096_g1,c205096_g2,c206160_g1,c209991_g1,c214633_g1,c216396_g2,c217609_g1,c218321_g1,c220409_g2,c221222_g1,c221224_g6,c222408_g1,c227582_g8,c229930_g1,c66653_g1,c80299_g1	BP	0.00191	0.0213637	33	658	6
GO:0097659	nucleic acid-templated transcription	c101851_g1,c149262_g1,c169718_g1,c176626_g1,c179665_g1,c181135_g1,c184292_g1,c186568_g1,c193956_g1,c193956_g2,c197313_g1,c199073_g1,c199538_g1,c200275_g2,c203513_g1,c204216_g1,c205089_g10,c205096_g1,c205096_g2,c206160_g1,c209991_g1,c214633_g1,c216396_g2,c217609_g1,c218321_g1,c220409_g2,c221222_g1,c221224_g6,c222408_g1,c227582_g8,c229930_g1,c66653_g1,c80299_g1	BP	0.00191	0.0213637	33	658	7
GO:0048518	positive regulation of biological process	c170672_g1,c188121_g1,c197313_g1,c200275_g2,c204216_g1,c210307_g1,c214633_g1,c221095_g1,c221224_g6,c223712_g3,c227294_g1,c66653_g1	BP	0.002	0.0201333	12	153	2
GO:0050896	response to stimulus	c100672_g1,c101851_g1,c113841_g1,c141087_g1,c144091_g1,c155953_g1,c170672_g1,c174861_g1,c181135_g1,c188121_g1,c190186_g1,c196744_g1,c199309_g1,c199538_g1,c200275_g2,c201128_g2,c203513_g1,c204216_g1,c205096_g1,c205274_g1,c205898_g2,c206962_g1,c209306_g1,c210307_g1,c211218_g1,c212009_g1,c212806_g3,c212969_g1,c214633_g1,c214701_g1,c217460_g1,c218321_g1,c220213_g3,c220973_g3,c221095_g1,c223391_g3,c22…	BP	0.00202	0.0190638	47	1046	2
GO:0016310	phosphorylation	c109670_g1,c137070_g1,c158760_g1,c169660_g1,c171256_g1,c178499_g1,c183801_g1,c190186_g1,c190478_g1,c199309_g1,c200275_g2,c205244_g1,c208856_g1,c209306_g1,c210307_g1,c212009_g1,c212806_g3,c214701_g1,c215387_g2,c215597_g5,c217578_g1,c220503_g1,c220756_g1,c221095_g1,c222203_g1,c223712_g3,c224200_g3,c224960_g1,c226320_g1,c227294_g1,c228400_g1,c228439_g3,c230056_g2,c230504_g2,c230703_g2,c230720_g1,c23…	BP	0.00207	0.0183865	40	851	6
GO:0032774	RNA biosynthetic process	c101851_g1,c149262_g1,c169718_g1,c176626_g1,c179665_g1,c181135_g1,c184292_g1,c186568_g1,c193956_g1,c193956_g2,c197313_g1,c199073_g1,c199538_g1,c200275_g2,c203513_g1,c204216_g1,c205089_g10,c205096_g1,c205096_g2,c206160_g1,c209991_g1,c214633_g1,c216396_g2,c217609_g1,c218321_g1,c220409_g2,c221222_g1,c221224_g6,c222408_g1,c227582_g8,c229930_g1,c66653_g1,c80299_g1	BP	0.00227	0.0190428	33	665	6
GO:0061077	chaperone-mediated protein folding	c144091_g1,c225186_g1	BP	0.00261	0.0207426	2	3	4
GO:0002833	positive regulation of response to biotic stimulus	c188121_g1,c200275_g2,c214633_g1,c223712_g3	BP	0.00311	0.0229078	4	21	4
GO:0043902	positive regulation of multi-organism process	c188121_g1,c200275_g2,c214633_g1,c223712_g3	BP	0.00311	0.0229078	4	21	3
GO:0006355	regulation of transcription, DNA-templated	c101851_g1,c149262_g1,c169718_g1,c176626_g1,c179665_g1,c181135_g1,c184292_g1,c186568_g1,c193956_g1,c193956_g2,c197313_g1,c199073_g1,c199538_g1,c200275_g2,c203513_g1,c204216_g1,c205089_g10,c205096_g1,c205096_g2,c206160_g1,c209991_g1,c214633_g1,c216396_g2,c217609_g1,c218321_g1,c220409_g2,c221224_g6,c222408_g1,c227582_g8,c229930_g1,c66653_g1,c80299_g1	BP	0.00316	0.0207461	32	652	6
GO:1903506	regulation of nucleic acid-templated transcription	c101851_g1,c149262_g1,c169718_g1,c176626_g1,c179665_g1,c181135_g1,c184292_g1,c186568_g1,c193956_g1,c193956_g2,c197313_g1,c199073_g1,c199538_g1,c200275_g2,c203513_g1,c204216_g1,c205089_g10,c205096_g1,c205096_g2,c206160_g1,c209991_g1,c214633_g1,c216396_g2,c217609_g1,c218321_g1,c220409_g2,c221224_g6,c222408_g1,c227582_g8,c229930_g1,c66653_g1,c80299_g1	BP	0.00316	0.0207461	32	652	7
GO:2001141	regulation of RNA biosynthetic process	c101851_g1,c149262_g1,c169718_g1,c176626_g1,c179665_g1,c181135_g1,c184292_g1,c186568_g1,c193956_g1,c193956_g2,c197313_g1,c199073_g1,c199538_g1,c200275_g2,c203513_g1,c204216_g1,c205089_g10,c205096_g1,c205096_g2,c206160_g1,c209991_g1,c214633_g1,c216396_g2,c217609_g1,c218321_g1,c220409_g2,c221224_g6,c222408_g1,c227582_g8,c229930_g1,c66653_g1,c80299_g1	BP	0.00316	0.0207461	32	652	6
GO:0006955	immune response	c144091_g1,c188121_g1,c199538_g1,c223712_g3,c225186_g1,c225422_g2,c80299_g1	BP	0.00336	0.0198965	7	66	3
GO:0045087	innate immune response	c144091_g1,c188121_g1,c199538_g1,c223712_g3,c225186_g1,c225422_g2,c80299_g1	BP	0.00336	0.0198965	7	66	4
GO:0032103	positive regulation of response to external stimulus	c188121_g1,c200275_g2,c214633_g1,c223712_g3	BP	0.00371	0.0207485	4	22	4
GO:0051252	regulation of RNA metabolic process	c101851_g1,c149262_g1,c169718_g1,c176626_g1,c179665_g1,c181135_g1,c184292_g1,c186568_g1,c193956_g1,c193956_g2,c197313_g1,c199073_g1,c199538_g1,c200275_g2,c203513_g1,c204216_g1,c205089_g10,c205096_g1,c205096_g2,c206160_g1,c209991_g1,c214633_g1,c216396_g2,c217609_g1,c218321_g1,c220409_g2,c221224_g6,c222408_g1,c227582_g8,c229930_g1,c66653_g1,c80299_g1	BP	0.00382	0.0206007	32	660	5
GO:0002376	immune system process	c144091_g1,c188121_g1,c199538_g1,c223712_g3,c225186_g1,c225422_g2,c80299_g1	BP	0.00397	0.0206714	7	68	2
GO:0010467	gene expression	c101851_g1,c149262_g1,c169718_g1,c174811_g1,c176626_g1,c178706_g1,c179665_g1,c181135_g1,c184292_g1,c186568_g1,c187930_g1,c193956_g1,c193956_g2,c196744_g1,c197313_g1,c199073_g1,c199464_g2,c199538_g1,c200275_g2,c201115_g1,c201128_g2,c203513_g1,c204216_g1,c205089_g10,c205096_g1,c205096_g2,c206160_g1,c209991_g1,c210869_g1,c211332_g2,c212424_g5,c214633_g1,c216396_g2,c217609_g1,c218321_g1,c219526_g2,c2…	BP	0.00403	0.0202843	49	1140	5
GO:0072330	monocarboxylic acid biosynthetic process	c100946_g1,c130530_g1,c137673_g1,c158760_g1,c171109_g1,c197215_g1,c209294_g1,c211198_g1,c218051_g1,c226586_g1,c228956_g1,c230416_g2,c230536_g2	BP	0.00458	0.022309	13	191	7
GO:0019219	regulation of nucleobase-containing compound metabolic process	c101851_g1,c149262_g1,c169718_g1,c176626_g1,c179665_g1,c181135_g1,c184292_g1,c186568_g1,c193956_g1,c193956_g2,c197313_g1,c199073_g1,c199538_g1,c200275_g2,c203513_g1,c204216_g1,c205089_g10,c205096_g1,c205096_g2,c206160_g1,c209991_g1,c214633_g1,c216396_g2,c217609_g1,c218321_g1,c220409_g2,c221224_g6,c222408_g1,c227582_g8,c229930_g1,c66653_g1,c80299_g1	BP	0.00459	0.0216591	32	668	5
GO:0009605	response to external stimulus	c144091_g1,c181135_g1,c188121_g1,c200275_g2,c203513_g1,c204216_g1,c205274_g1,c210307_g1,c214633_g1,c221095_g1,c223712_g3,c225186_g1,c227294_g1	BP	0.00478	0.0218721	13	192	3
GO:0006457	protein folding	c144091_g1,c225186_g1	BP	0.00513	0.022453	2	4	3
GO:0008285	negative regulation of cell proliferation	c158109_g1,c66653_g1	BP	0.00513	0.022453	2	4	3
GO:1901698	response to nitrogen compound	c181135_g1,c205898_g2,c214701_g1,c223712_g3,c228620_g2	BP	0.00572	0.0239922	5	39	4
GO:0010468	regulation of gene expression	c101851_g1,c149262_g1,c169718_g1,c176626_g1,c179665_g1,c181135_g1,c184292_g1,c186568_g1,c193956_g1,c193956_g2,c196744_g1,c197313_g1,c199073_g1,c199538_g1,c200275_g2,c203513_g1,c204216_g1,c205089_g10,c205096_g1,c205096_g2,c206160_g1,c209991_g1,c214633_g1,c216396_g2,c217609_g1,c218321_g1,c220409_g2,c221224_g6,c222408_g1,c227582_g8,c228620_g2,c229930_g1,c231222_g1,c66653_g1,c80299_g1	BP	0.00615	0.0250986	35	764	5
GO:0048584	positive regulation of response to stimulus	c170672_g1,c188121_g1,c200275_g2,c204216_g1,c214633_g1,c223712_g3	BP	0.00619	0.0245971	6	56	3
GO:0051187	cofactor catabolic process	c197233_g1,c211663_g2,c215086_g7,c225503_g1,c230956_g1	BP	0.00638	0.0247021	5	40	5
GO:0010243	response to organonitrogen compound	c181135_g1,c205898_g2,c214701_g1,c223712_g3	BP	0.00691	0.0260853	4	26	5
GO:0042743	hydrogen peroxide metabolic process	c211663_g2,c215086_g7,c225503_g1,c227294_g1,c230956_g1	BP	0.00709	0.026112	5	41	5
GO:0009814	defense response, incompatible interaction	c144091_g1,c188121_g1,c225186_g1	BP	0.00751	0.0270002	3	14	5
GO:0031407	oxylipin metabolic process	c209294_g1,c226586_g1,c228956_g1,c230416_g2	BP	0.00793	0.0275271	4	27	6
GO:0031408	oxylipin biosynthetic process	c209294_g1,c226586_g1,c228956_g1,c230416_g2	BP	0.00793	0.0275271	4	27	7
GO:0050789	regulation of biological process	c101851_g1,c149262_g1,c156326_g2,c158109_g1,c169718_g1,c170672_g1,c174861_g1,c176626_g1,c179665_g1,c181135_g1,c184292_g1,c186568_g1,c188121_g1,c193956_g1,c193956_g2,c196744_g1,c197313_g1,c199073_g1,c199538_g1,c200275_g2,c203513_g1,c204216_g1,c205089_g10,c205096_g1,c205096_g2,c205274_g1,c205898_g2,c206160_g1,c206962_g1,c209991_g1,c210307_g1,c211218_g1,c214633_g1,c215875_g1,c216396_g2,c217609_g1,c2…	BP	0.00807	0.0270793	51	1240	2
GO:0019222	regulation of metabolic process	c101851_g1,c149262_g1,c169718_g1,c176626_g1,c179665_g1,c181135_g1,c184292_g1,c186568_g1,c193956_g1,c193956_g2,c196744_g1,c197313_g1,c199073_g1,c199538_g1,c200275_g2,c203513_g1,c204216_g1,c205089_g10,c205096_g1,c205096_g2,c206160_g1,c209991_g1,c214633_g1,c216396_g2,c217609_g1,c218321_g1,c220409_g2,c221224_g6,c222408_g1,c227294_g1,c227582_g8,c228620_g2,c229930_g1,c231222_g1,c66653_g1,c80299_g1	BP	0.00812	0.0266548	36	806	3
GO:0006633	fatty acid biosynthetic process	c130530_g1,c171109_g1,c209294_g1,c211198_g1,c218051_g1,c226586_g1,c228956_g1,c230416_g2	BP	0.00823	0.0264411	8	97	6
GO:0090304	nucleic acid metabolic process	c101851_g1,c149262_g1,c169718_g1,c174811_g1,c176626_g1,c178706_g1,c179665_g1,c181135_g1,c184292_g1,c186568_g1,c187930_g1,c193956_g1,c193956_g2,c197313_g1,c199073_g1,c199464_g2,c199538_g1,c200275_g2,c201115_g1,c203513_g1,c204216_g1,c205089_g10,c205096_g1,c205096_g2,c206160_g1,c209991_g1,c211332_g2,c212424_g5,c212969_g1,c214024_g1,c214633_g1,c216396_g2,c217609_g1,c218321_g1,c219526_g2,c220409_g2,c2…	BP	0.00833	0.0262048	47	1124	5
GO:0060255	regulation of macromolecule metabolic process	c101851_g1,c149262_g1,c169718_g1,c176626_g1,c179665_g1,c181135_g1,c184292_g1,c186568_g1,c193956_g1,c193956_g2,c196744_g1,c197313_g1,c199073_g1,c199538_g1,c200275_g2,c203513_g1,c204216_g1,c205089_g10,c205096_g1,c205096_g2,c206160_g1,c209991_g1,c214633_g1,c216396_g2,c217609_g1,c218321_g1,c220409_g2,c221224_g6,c222408_g1,c227582_g8,c228620_g2,c229930_g1,c231222_g1,c66653_g1,c80299_g1	BP	0.00846	0.0260706	35	780	4
GO:0098542	defense response to other organism	c144091_g1,c188121_g1,c200275_g2,c205274_g1,c214633_g1,c223712_g3,c225186_g1,c227294_g1	BP	0.00874	0.0263948	8	98	4
GO:2000112	regulation of cellular macromolecule biosynthetic process	c101851_g1,c149262_g1,c169718_g1,c176626_g1,c179665_g1,c181135_g1,c184292_g1,c186568_g1,c193956_g1,c193956_g2,c197313_g1,c199073_g1,c199538_g1,c200275_g2,c203513_g1,c204216_g1,c205089_g10,c205096_g1,c205096_g2,c206160_g1,c209991_g1,c214633_g1,c216396_g2,c217609_g1,c218321_g1,c220409_g2,c221224_g6,c222408_g1,c227582_g8,c229930_g1,c66653_g1,c80299_g1	BP	0.00893	0.0264398	32	699	6
GO:0010556	regulation of macromolecule biosynthetic process	c101851_g1,c149262_g1,c169718_g1,c176626_g1,c179665_g1,c181135_g1,c184292_g1,c186568_g1,c193956_g1,c193956_g2,c197313_g1,c199073_g1,c199538_g1,c200275_g2,c203513_g1,c204216_g1,c205089_g10,c205096_g1,c205096_g2,c206160_g1,c209991_g1,c214633_g1,c216396_g2,c217609_g1,c218321_g1,c220409_g2,c221224_g6,c222408_g1,c227582_g8,c229930_g1,c66653_g1,c80299_g1	BP	0.00911	0.026454	32	700	5
GO:1900426	positive regulation of defense response to bacterium	c188121_g1,c214633_g1,c223712_g3	BP	0.00918	0.0261543	3	15	4
GO:1901362	organic cyclic compound biosynthetic process	c100946_g1,c101851_g1,c149262_g1,c158760_g1,c162028_g1,c169718_g1,c176626_g1,c179665_g1,c181135_g1,c184292_g1,c186568_g1,c193956_g1,c193956_g2,c197313_g1,c199073_g1,c199538_g1,c200275_g2,c203513_g1,c204216_g1,c205089_g10,c205096_g1,c205096_g2,c206160_g1,c209991_g1,c214633_g1,c216396_g2,c217609_g1,c217911_g1,c218321_g1,c220344_g3,c220409_g2,c221222_g1,c221224_g6,c222408_g1,c225909_g2,c226008_g1,c2…	BP	0.0098	0.0274037	44	1046	5
GO:0006796	phosphate-containing compound metabolic process	c109670_g1,c137070_g1,c158760_g1,c162028_g1,c169660_g1,c171256_g1,c178499_g1,c183801_g1,c190186_g1,c190478_g1,c199309_g1,c200275_g2,c205244_g1,c208856_g1,c209306_g1,c210307_g1,c212009_g1,c212806_g3,c214701_g1,c215387_g2,c215597_g5,c217578_g1,c220344_g3,c220503_g1,c220756_g1,c221095_g1,c222203_g1,c223712_g3,c224200_g3,c224960_g1,c226320_g1,c227027_g2,c227294_g1,c228400_g1,c228439_g3,c230056_g2,c23…	BP	0.0105	0.0288273	43	1021	5
GO:0031326	regulation of cellular biosynthetic process	c101851_g1,c149262_g1,c169718_g1,c176626_g1,c179665_g1,c181135_g1,c184292_g1,c186568_g1,c193956_g1,c193956_g2,c197313_g1,c199073_g1,c199538_g1,c200275_g2,c203513_g1,c204216_g1,c205089_g10,c205096_g1,c205096_g2,c206160_g1,c209991_g1,c214633_g1,c216396_g2,c217609_g1,c218321_g1,c220409_g2,c221224_g6,c222408_g1,c227582_g8,c229930_g1,c66653_g1,c80299_g1	BP	0.01113	0.0300112	32	710	5
GO:0065007	biological regulation	c101851_g1,c149262_g1,c156326_g2,c158109_g1,c169718_g1,c170672_g1,c174861_g1,c176626_g1,c179665_g1,c181135_g1,c184292_g1,c186568_g1,c188121_g1,c193956_g1,c193956_g2,c196744_g1,c197313_g1,c199073_g1,c199538_g1,c200275_g2,c201297_g1,c203513_g1,c204216_g1,c205089_g10,c205096_g1,c205096_g2,c205274_g1,c205898_g2,c206160_g1,c206962_g1,c209991_g1,c210307_g1,c211218_g1,c214633_g1,c215875_g1,c216396_g2,c2…	BP	0.01117	0.0295907	54	1351	2
GO:0009889	regulation of biosynthetic process	c101851_g1,c149262_g1,c169718_g1,c176626_g1,c179665_g1,c181135_g1,c184292_g1,c186568_g1,c193956_g1,c193956_g2,c197313_g1,c199073_g1,c199538_g1,c200275_g2,c203513_g1,c204216_g1,c205089_g10,c205096_g1,c205096_g2,c206160_g1,c209991_g1,c214633_g1,c216396_g2,c217609_g1,c218321_g1,c220409_g2,c221224_g6,c222408_g1,c227582_g8,c229930_g1,c66653_g1,c80299_g1	BP	0.01135	0.0295491	32	711	4
GO:0019438	aromatic compound biosynthetic process	c100946_g1,c101851_g1,c149262_g1,c158760_g1,c162028_g1,c169718_g1,c176626_g1,c179665_g1,c181135_g1,c184292_g1,c186568_g1,c193956_g1,c193956_g2,c197313_g1,c199073_g1,c199538_g1,c200275_g2,c203513_g1,c204216_g1,c205089_g10,c205096_g1,c205096_g2,c206160_g1,c209991_g1,c214633_g1,c216396_g2,c217609_g1,c218321_g1,c220344_g3,c220409_g2,c221222_g1,c221224_g6,c222408_g1,c225909_g2,c227027_g2,c227582_g8,c2…	BP	0.01144	0.0292786	41	968	5
GO:0009409	response to cold	c170672_g1,c201128_g2,c210307_g1,c220213_g3,c221095_g1	BP	0.0115	0.0287025	5	46	4
GO:0072593	reactive oxygen species metabolic process	c211663_g2,c215086_g7,c225503_g1,c227294_g1,c230956_g1	BP	0.0115	0.0287025	5	46	4
GO:0031349	positive regulation of defense response	c188121_g1,c200275_g2,c214633_g1,c223712_g3	BP	0.01155	0.0281298	4	30	4
GO:0042742	defense response to bacterium	c144091_g1,c188121_g1,c205274_g1,c214633_g1,c223712_g3,c225186_g1	BP	0.01175	0.0281627	6	64	5
GO:0031323	regulation of cellular metabolic process	c101851_g1,c149262_g1,c169718_g1,c176626_g1,c179665_g1,c181135_g1,c184292_g1,c186568_g1,c193956_g1,c193956_g2,c197313_g1,c199073_g1,c199538_g1,c200275_g2,c203513_g1,c204216_g1,c205089_g10,c205096_g1,c205096_g2,c206160_g1,c209991_g1,c214633_g1,c216396_g2,c217609_g1,c218321_g1,c220409_g2,c221224_g6,c222408_g1,c227294_g1,c227582_g8,c229930_g1,c66653_g1,c80299_g1	BP	0.01224	0.0288788	33	743	4
GO:0051171	regulation of nitrogen compound metabolic process	c101851_g1,c149262_g1,c169718_g1,c176626_g1,c179665_g1,c181135_g1,c184292_g1,c186568_g1,c193956_g1,c193956_g2,c197313_g1,c199073_g1,c199538_g1,c200275_g2,c203513_g1,c204216_g1,c205089_g10,c205096_g1,c205096_g2,c206160_g1,c209991_g1,c214633_g1,c216396_g2,c217609_g1,c218321_g1,c220409_g2,c221224_g6,c222408_g1,c227582_g8,c229930_g1,c66653_g1,c80299_g1	BP	0.01226	0.0284809	32	715	4
GO:0000060	protein import into nucleus, translocation	c210307_g1,c221095_g1	BP	0.01232	0.0256596	2	6	6
GO:0006606	protein import into nucleus	c210307_g1,c221095_g1	BP	0.01232	0.0256596	2	6	6
GO:0009625	response to insect	c210307_g1,c221095_g1	BP	0.01232	0.0256596	2	6	4
GO:0033158	regulation of protein import into nucleus, translocation	c210307_g1,c221095_g1	BP	0.01232	0.0256596	2	6	7
GO:0033160	positive regulation of protein import into nucleus, translocation	c210307_g1,c221095_g1	BP	0.01232	0.0256596	2	6	6
GO:0042306	regulation of protein import into nucleus	c210307_g1,c221095_g1	BP	0.01232	0.0256596	2	6	7
GO:0042307	positive regulation of protein import into nucleus	c210307_g1,c221095_g1	BP	0.01232	0.0256596	2	6	5
GO:0042537	benzene-containing compound metabolic process	c100946_g1,c230536_g2	BP	0.01232	0.0256596	2	6	5
GO:0046822	regulation of nucleocytoplasmic transport	c210307_g1,c221095_g1	BP	0.01232	0.0256596	2	6	6
GO:0046824	positive regulation of nucleocytoplasmic transport	c210307_g1,c221095_g1	BP	0.01232	0.0256596	2	6	5
GO:0051170	import into nucleus	c210307_g1,c221095_g1	BP	0.01232	0.0256596	2	6	7
GO:1900180	regulation of protein localization to nucleus	c210307_g1,c221095_g1	BP	0.01232	0.0256596	2	6	6
GO:1900182	positive regulation of protein localization to nucleus	c210307_g1,c221095_g1	BP	0.01232	0.0256596	2	6	4
GO:1904591	positive regulation of protein import	c210307_g1,c221095_g1	BP	0.01232	0.0256596	2	6	5
GO:0009408	response to heat	c141087_g1,c170672_g1,c218321_g1,c230878_g2	BP	0.01295	0.0244431	4	31	4
GO:0042398	cellular modified amino acid biosynthetic process	c137673_g1,c183170_g1,c229555_g4	BP	0.01313	0.0244769	3	17	6
GO:0009628	response to abiotic stimulus	c141087_g1,c170672_g1,c181135_g1,c188121_g1,c201128_g2,c203513_g1,c204216_g1,c210307_g1,c214633_g1,c214701_g1,c218321_g1,c220213_g3,c221095_g1,c230878_g2	BP	0.01424	0.0262224	14	244	3
GO:0080090	regulation of primary metabolic process	c101851_g1,c149262_g1,c169718_g1,c176626_g1,c179665_g1,c181135_g1,c184292_g1,c186568_g1,c193956_g1,c193956_g2,c197313_g1,c199073_g1,c199538_g1,c200275_g2,c203513_g1,c204216_g1,c205089_g10,c205096_g1,c205096_g2,c206160_g1,c209991_g1,c214633_g1,c216396_g2,c217609_g1,c218321_g1,c220409_g2,c221224_g6,c222408_g1,c227582_g8,c229930_g1,c66653_g1,c80299_g1	BP	0.01482	0.0269617	32	725	4
GO:0010629	negative regulation of gene expression	c196744_g1,c197313_g1,c200275_g2,c214633_g1,c221224_g6,c227582_g8,c228620_g2,c231222_g1,c66653_g1	BP	0.01554	0.027935	9	130	5
GO:0042744	hydrogen peroxide catabolic process	c211663_g2,c215086_g7,c225503_g1,c230956_g1	BP	0.01608	0.0285656	4	33	6
GO:0017038	protein import	c210307_g1,c221095_g1	BP	0.01691	0.0283712	2	7	6
GO:0032388	positive regulation of intracellular transport	c210307_g1,c221095_g1	BP	0.01691	0.0283712	2	7	4
GO:0046898	response to cycloheximide	c181135_g1,c214701_g1	BP	0.01691	0.0283712	2	7	5
GO:0051222	positive regulation of protein transport	c210307_g1,c221095_g1	BP	0.01691	0.0283712	2	7	4
GO:0090316	positive regulation of intracellular protein transport	c210307_g1,c221095_g1	BP	0.01691	0.0283712	2	7	4
GO:1901654	response to ketone	c181135_g1,c214701_g1	BP	0.01691	0.0283712	2	7	5
GO:1903829	positive regulation of cellular protein localization	c210307_g1,c221095_g1	BP	0.01691	0.0283712	2	7	3
GO:1904589	regulation of protein import	c210307_g1,c221095_g1	BP	0.01691	0.0283712	2	7	7
GO:1904951	positive regulation of establishment of protein localization	c210307_g1,c221095_g1	BP	0.01691	0.0283712	2	7	3
GO:0008152	metabolic process	c100946_g1,c101851_g1,c108857_g1,c109670_g1,c130530_g1,c137070_g1,c137673_g1,c148363_g4,c149262_g1,c153220_g1,c155953_g1,c156326_g2,c158760_g1,c162028_g1,c169660_g1,c169718_g1,c170672_g1,c171109_g1,c171256_g1,c174811_g1,c176155_g1,c176626_g1,c177784_g4,c178499_g1,c178706_g1,c179665_g1,c180943_g1,c181135_g1,c183170_g1,c183801_g1,c184292_g1,c186568_g1,c187930_g1,c190186_g1,c190478_g1,c193956_g1,c19…	BP	0.01739	0.0276409	159	4881	2
GO:0006793	phosphorus metabolic process	c109670_g1,c137070_g1,c158760_g1,c162028_g1,c169660_g1,c171256_g1,c178499_g1,c183801_g1,c190186_g1,c190478_g1,c199309_g1,c200275_g2,c205244_g1,c208856_g1,c209306_g1,c210307_g1,c212009_g1,c212806_g3,c214701_g1,c215387_g2,c215597_g5,c217578_g1,c220344_g3,c220503_g1,c220756_g1,c221095_g1,c222203_g1,c223712_g3,c224200_g3,c224960_g1,c226320_g1,c227027_g2,c227294_g1,c228400_g1,c228439_g3,c230056_g2,c23…	BP	0.01859	0.0292405	43	1057	4
GO:0017001	antibiotic catabolic process	c211663_g2,c215086_g7,c225503_g1,c230956_g1	BP	0.01965	0.0305892	4	35	5
GO:0042737	drug catabolic process	c199907_g1,c209679_g1,c211663_g2,c215086_g7,c225503_g1,c228425_g1,c230956_g1	BP	0.01975	0.0304311	7	92	5
GO:0051704	multi-organism process	c144091_g1,c174451_g1,c181135_g1,c188121_g1,c200275_g2,c205274_g1,c210307_g1,c214633_g1,c221095_g1,c223712_g3,c225186_g1,c227294_g1	BP	0.02021	0.0308254	12	206	2
GO:0010605	negative regulation of macromolecule metabolic process	c196744_g1,c197313_g1,c200275_g2,c214633_g1,c221224_g6,c227582_g8,c228620_g2,c231222_g1,c66653_g1	BP	0.02209	0.0333559	9	138	4
GO:0006022	aminoglycan metabolic process	c199907_g1,c209679_g1	BP	0.02211	0.0300776	2	8	5
GO:0006026	aminoglycan catabolic process	c199907_g1,c209679_g1	BP	0.02211	0.0300776	2	8	6
GO:0006030	chitin metabolic process	c199907_g1,c209679_g1	BP	0.02211	0.0300776	2	8	5
GO:0006032	chitin catabolic process	c199907_g1,c209679_g1	BP	0.02211	0.0300776	2	8	6
GO:0006913	nucleocytoplasmic transport	c210307_g1,c221095_g1	BP	0.02211	0.0300776	2	8	6
GO:0032386	regulation of intracellular transport	c210307_g1,c221095_g1	BP	0.02211	0.0300776	2	8	5
GO:0032880	regulation of protein localization	c210307_g1,c221095_g1	BP	0.02211	0.0300776	2	8	4
GO:0033157	regulation of intracellular protein transport	c210307_g1,c221095_g1	BP	0.02211	0.0300776	2	8	6
GO:0034504	protein localization to nucleus	c210307_g1,c221095_g1	BP	0.02211	0.0300776	2	8	7
GO:0046348	amino sugar catabolic process	c199907_g1,c209679_g1	BP	0.02211	0.0300776	2	8	6
GO:0051169	nuclear transport	c210307_g1,c221095_g1	BP	0.02211	0.0300776	2	8	5
GO:0051223	regulation of protein transport	c210307_g1,c221095_g1	BP	0.02211	0.0300776	2	8	6
GO:0060341	regulation of cellular localization	c210307_g1,c221095_g1	BP	0.02211	0.0300776	2	8	4
GO:0060992	response to fungicide	c181135_g1,c214701_g1	BP	0.02211	0.0300776	2	8	5
GO:0070201	regulation of establishment of protein localization	c210307_g1,c221095_g1	BP	0.02211	0.0300776	2	8	5
GO:0090087	regulation of peptide transport	c210307_g1,c221095_g1	BP	0.02211	0.0300776	2	8	5
GO:1901002	positive regulation of response to salt stress	c170672_g1,c188121_g1	BP	0.02211	0.0300776	2	8	4
GO:1901071	glucosamine-containing compound metabolic process	c199907_g1,c209679_g1	BP	0.02211	0.0300776	2	8	6
GO:1901072	glucosamine-containing compound catabolic process	c199907_g1,c209679_g1	BP	0.02211	0.0300776	2	8	7
GO:1901136	carbohydrate derivative catabolic process	c199907_g1,c209679_g1	BP	0.02211	0.0300776	2	8	5
GO:1903827	regulation of cellular protein localization	c210307_g1,c221095_g1	BP	0.02211	0.0300776	2	8	5
GO:0080134	regulation of response to stress	c170672_g1,c188121_g1,c200275_g2,c214633_g1,c223712_g3,c80299_g1	BP	0.02413	0.0298658	6	75	4
GO:0034654	nucleobase-containing compound biosynthetic process	c101851_g1,c149262_g1,c158760_g1,c162028_g1,c169718_g1,c176626_g1,c179665_g1,c181135_g1,c184292_g1,c186568_g1,c193956_g1,c193956_g2,c197313_g1,c199073_g1,c199538_g1,c200275_g2,c203513_g1,c204216_g1,c205089_g10,c205096_g1,c205096_g2,c206160_g1,c209991_g1,c214633_g1,c216396_g2,c217609_g1,c218321_g1,c220409_g2,c221222_g1,c221224_g6,c222408_g1,c227582_g8,c229930_g1,c66653_g1,c80299_g1	BP	0.02566	0.0315013	35	843	5
GO:1901360	organic cyclic compound metabolic process	c100946_g1,c101851_g1,c149262_g1,c158760_g1,c162028_g1,c169718_g1,c174811_g1,c176626_g1,c178706_g1,c179665_g1,c181135_g1,c184292_g1,c186568_g1,c187930_g1,c193956_g1,c193956_g2,c197313_g1,c199073_g1,c199464_g2,c199538_g1,c200275_g2,c201115_g1,c203513_g1,c204216_g1,c205089_g10,c205096_g1,c205096_g2,c206160_g1,c209991_g1,c211332_g2,c212424_g5,c212969_g1,c214024_g1,c214633_g1,c216396_g2,c217609_g1,c2…	BP	0.02627	0.0319901	59	1568	4
GO:0031347	regulation of defense response	c188121_g1,c200275_g2,c214633_g1,c223712_g3,c80299_g1	BP	0.02704	0.0326643	5	57	5
GO:0008610	lipid biosynthetic process	c130530_g1,c171109_g1,c197215_g1,c201297_g1,c206036_g1,c209294_g1,c211198_g1,c217911_g1,c218051_g1,c220344_g3,c226008_g1,c226586_g1,c228956_g1,c230416_g2,c252984_g1	BP	0.0273	0.0327167	15	291	5
GO:0006749	glutathione metabolic process	c183170_g1,c197233_g1	BP	0.02787	0.0330068	2	9	5
GO:0051050	positive regulation of transport	c210307_g1,c221095_g1	BP	0.02787	0.0330068	2	9	3
GO:0048519	negative regulation of biological process	c158109_g1,c196744_g1,c197313_g1,c200275_g2,c205274_g1,c214633_g1,c221224_g6,c227582_g8,c228620_g2,c231222_g1,c66653_g1,c80299_g1	BP	0.02801	0.0327869	12	216	2
GO:0006575	cellular modified amino acid metabolic process	c137673_g1,c183170_g1,c197233_g1,c229555_g4	BP	0.02816	0.0327089	4	39	4
GO:0016458	gene silencing	c196744_g1,c197313_g1,c200275_g2,c227582_g8,c228620_g2,c231222_g1	BP	0.02862	0.0329895	6	78	3
GO:0009892	negative regulation of metabolic process	c196744_g1,c197313_g1,c200275_g2,c214633_g1,c221224_g6,c227582_g8,c228620_g2,c231222_g1,c66653_g1	BP	0.02927	0.0334831	9	145	3
GO:0006631	fatty acid metabolic process	c130530_g1,c171109_g1,c209294_g1,c211198_g1,c217278_g1,c218051_g1,c226586_g1,c228956_g1,c230416_g2	BP	0.0316	0.0358767	9	147	5
GO:0032787	monocarboxylic acid metabolic process	c100946_g1,c130530_g1,c137673_g1,c158760_g1,c171109_g1,c197215_g1,c209294_g1,c211198_g1,c217278_g1,c218051_g1,c226586_g1,c228956_g1,c230416_g2,c230536_g2	BP	0.03275	0.0369049	14	272	7
GO:0050794	regulation of cellular process	c101851_g1,c149262_g1,c158109_g1,c169718_g1,c174861_g1,c176626_g1,c179665_g1,c181135_g1,c184292_g1,c186568_g1,c188121_g1,c193956_g1,c193956_g2,c197313_g1,c199073_g1,c199538_g1,c200275_g2,c203513_g1,c204216_g1,c205089_g10,c205096_g1,c205096_g2,c205274_g1,c205898_g2,c206160_g1,c206962_g1,c209991_g1,c211218_g1,c214633_g1,c215875_g1,c216396_g2,c217609_g1,c218321_g1,c220409_g2,c221224_g6,c222408_g1,c2…	BP	0.03292	0.0368216	42	1067	3
GO:0006725	cellular aromatic compound metabolic process	c100946_g1,c101851_g1,c149262_g1,c158760_g1,c162028_g1,c169718_g1,c174811_g1,c176626_g1,c178706_g1,c179665_g1,c181135_g1,c184292_g1,c186568_g1,c187930_g1,c193956_g1,c193956_g2,c197313_g1,c199073_g1,c199464_g2,c199538_g1,c200275_g2,c201115_g1,c203513_g1,c204216_g1,c205089_g10,c205096_g1,c205096_g2,c206160_g1,c209991_g1,c211332_g2,c212424_g5,c212969_g1,c214024_g1,c214633_g1,c216396_g2,c217609_g1,c2…	BP	0.03294	0.0365731	56	1494	4
GO:0002237	response to molecule of bacterial origin	c210307_g1,c221095_g1	BP	0.03416	0.0375139	2	10	5
GO:0072594	establishment of protein localization to organelle	c210307_g1,c221095_g1	BP	0.03416	0.0375139	2	10	5
GO:1900424	regulation of defense response to bacterium	c188121_g1,c214633_g1,c223712_g3	BP	0.03731	0.040531	3	25	4
GO:0002831	regulation of response to biotic stimulus	c188121_g1,c200275_g2,c214633_g1,c223712_g3	BP	0.03856	0.0415897	4	43	4
GO:0006040	amino sugar metabolic process	c199907_g1,c209679_g1	BP	0.04094	0.0438435	2	11	5
GO:0032101	regulation of response to external stimulus	c188121_g1,c200275_g2,c214633_g1,c223712_g3	BP	0.04147	0.0439436	4	44	4
GO:0043900	regulation of multi-organism process	c188121_g1,c200275_g2,c214633_g1,c223712_g3	BP	0.04147	0.0439436	4	44	3
GO:0018130	heterocycle biosynthetic process	c101851_g1,c149262_g1,c158760_g1,c162028_g1,c169718_g1,c176626_g1,c179665_g1,c181135_g1,c184292_g1,c186568_g1,c193956_g1,c193956_g2,c197313_g1,c199073_g1,c199538_g1,c200275_g2,c203513_g1,c204216_g1,c205089_g10,c205096_g1,c205096_g2,c206160_g1,c209991_g1,c214633_g1,c216396_g2,c217609_g1,c218321_g1,c220344_g3,c220409_g2,c221222_g1,c221224_g6,c222408_g1,c227027_g2,c227582_g8,c229555_g4,c229930_g1,c6…	BP	0.04428	0.0464325	38	969	5
GO:0006772	thiamine metabolic process	c220344_g3,c227027_g2	BP	0.04818	0.049491	2	12	6
GO:0009228	thiamine biosynthetic process	c220344_g3,c227027_g2	BP	0.04818	0.049491	2	12	7
GO:0010286	heat acclimation	c141087_g1,c170672_g1	BP	0.04818	0.049491	2	12	5
GO:0042723	thiamine-containing compound metabolic process	c220344_g3,c227027_g2	BP	0.04818	0.049491	2	12	5
GO:0042724	thiamine-containing compound biosynthetic process	c220344_g3,c227027_g2	BP	0.04818	0.049491	2	12	6
GO:0031047	gene silencing by RNA	c196744_g1,c200275_g2,c227582_g8,c228620_g2,c231222_g1	BP	0.04925	0.0495783	5	67	4
GO:1901699	cellular response to nitrogen compound	c205898_g2,c223712_g3,c228620_g2	BP	0.04981	0.04981	3	28	5
GO:0008144	drug binding	c109670_g1,c130530_g1,c137070_g1,c137673_g1,c144091_g1,c169660_g1,c171256_g1,c174451_g1,c177784_g4,c178499_g1,c178706_g1,c183170_g1,c183801_g1,c187384_g1,c190186_g1,c190478_g1,c199309_g1,c200275_g2,c201154_g1,c205244_g1,c205274_g1,c208353_g1,c208493_g1,c208856_g1,c209306_g1,c209679_g1,c210307_g1,c212009_g1,c212806_g3,c212969_g1,c214024_g1,c214701_g1,c215387_g2,c215597_g5,c216034_g4,c216809_g1,c21…	MF	8e-05	0.00296	80	1731	3
GO:0005524	ATP binding	c109670_g1,c130530_g1,c137070_g1,c137673_g1,c144091_g1,c169660_g1,c171256_g1,c174451_g1,c177784_g4,c178499_g1,c178706_g1,c183170_g1,c183801_g1,c187384_g1,c190186_g1,c190478_g1,c199309_g1,c200275_g2,c201154_g1,c205244_g1,c205274_g1,c208353_g1,c208493_g1,c208856_g1,c209306_g1,c210307_g1,c212009_g1,c212806_g3,c212969_g1,c214024_g1,c214701_g1,c215387_g2,c215597_g5,c216034_g4,c216809_g1,c217278_g1,c21…	MF	0.00011	0.002035	79	1717	4
GO:0004674	protein serine/threonine kinase activity	c109670_g1,c137070_g1,c169660_g1,c171256_g1,c178499_g1,c183801_g1,c190186_g1,c190478_g1,c199309_g1,c205244_g1,c208856_g1,c209306_g1,c210307_g1,c212009_g1,c212806_g3,c214701_g1,c215387_g2,c215597_g5,c217578_g1,c220503_g1,c220756_g1,c221095_g1,c222203_g1,c223712_g3,c224200_g3,c226320_g1,c227294_g1,c228400_g1,c228439_g3,c230056_g2,c230504_g2,c230703_g2,c230720_g1,c231373_g1,c231786_g1,c249905_g1	MF	0.00013	0.00160333	36	603	5
GO:0030554	adenyl nucleotide binding	c109670_g1,c130530_g1,c137070_g1,c137673_g1,c144091_g1,c169660_g1,c171256_g1,c174451_g1,c177784_g4,c178499_g1,c178706_g1,c183170_g1,c183801_g1,c187384_g1,c190186_g1,c190478_g1,c199309_g1,c200275_g2,c201154_g1,c205244_g1,c205274_g1,c208353_g1,c208493_g1,c208856_g1,c209306_g1,c210307_g1,c212009_g1,c212806_g3,c212969_g1,c214024_g1,c214701_g1,c215387_g2,c215597_g5,c216034_g4,c216809_g1,c217278_g1,c21…	MF	0.00014	0.00115111	79	1729	6
GO:0032559	adenyl ribonucleotide binding	c109670_g1,c130530_g1,c137070_g1,c137673_g1,c144091_g1,c169660_g1,c171256_g1,c174451_g1,c177784_g4,c178499_g1,c178706_g1,c183170_g1,c183801_g1,c187384_g1,c190186_g1,c190478_g1,c199309_g1,c200275_g2,c201154_g1,c205244_g1,c205274_g1,c208353_g1,c208493_g1,c208856_g1,c209306_g1,c210307_g1,c212009_g1,c212806_g3,c212969_g1,c214024_g1,c214701_g1,c215387_g2,c215597_g5,c216034_g4,c216809_g1,c217278_g1,c21…	MF	0.00014	0.00115111	79	1729	6
GO:0043168	anion binding	c109670_g1,c130530_g1,c137070_g1,c137673_g1,c144091_g1,c169660_g1,c171256_g1,c174451_g1,c177784_g4,c178499_g1,c178706_g1,c183170_g1,c183801_g1,c183951_g1,c187384_g1,c188121_g1,c190186_g1,c190478_g1,c199309_g1,c200275_g2,c200960_g1,c201128_g2,c201154_g1,c205244_g1,c205274_g1,c208353_g1,c208493_g1,c208612_g1,c208856_g1,c209306_g1,c210307_g1,c210869_g1,c212009_g1,c212806_g3,c212969_g1,c214024_g1,c21…	MF	0.00016	0.000986667	87	1964	4
GO:0005488	binding	c100672_g1,c101851_g1,c109670_g1,c130530_g1,c137070_g1,c137673_g1,c144091_g1,c148363_g4,c149262_g1,c169660_g1,c169718_g1,c171256_g1,c174451_g1,c174811_g1,c176155_g1,c176626_g1,c177784_g4,c178499_g1,c178706_g1,c179279_g2,c179665_g1,c180943_g1,c181135_g1,c183170_g1,c183801_g1,c183951_g1,c186568_g1,c187384_g1,c187930_g1,c188121_g1,c190186_g1,c190478_g1,c193956_g1,c193956_g2,c196744_g1,c197215_g1,c19…	MF	0.00021	0.00111	167	4520	2
GO:0043167	ion binding	c109670_g1,c130530_g1,c137070_g1,c137673_g1,c144091_g1,c148363_g4,c169660_g1,c169718_g1,c171256_g1,c174451_g1,c176155_g1,c177784_g4,c178499_g1,c178706_g1,c180943_g1,c183170_g1,c183801_g1,c183951_g1,c187384_g1,c187930_g1,c188121_g1,c190186_g1,c190478_g1,c193956_g1,c193956_g2,c197215_g1,c197313_g1,c198566_g2,c199073_g1,c199309_g1,c199863_g1,c200275_g2,c200421_g1,c200960_g1,c201128_g2,c201154_g1,c20…	MF	0.00024	0.00111	132	3356	3
GO:0004672	protein kinase activity	c109670_g1,c137070_g1,c169660_g1,c171256_g1,c178499_g1,c183801_g1,c190186_g1,c190478_g1,c199309_g1,c205244_g1,c208856_g1,c209306_g1,c210307_g1,c212009_g1,c212806_g3,c214701_g1,c215387_g2,c215597_g5,c217578_g1,c220503_g1,c220756_g1,c221095_g1,c222203_g1,c223712_g3,c224200_g3,c226320_g1,c227294_g1,c228400_g1,c228439_g3,c230056_g2,c230504_g2,c230703_g2,c230720_g1,c231373_g1,c231786_g1,c249905_g1	MF	0.00028	0.00115111	36	626	4
GO:0097367	carbohydrate derivative binding	c109670_g1,c130530_g1,c137070_g1,c137673_g1,c144091_g1,c169660_g1,c171256_g1,c174451_g1,c177784_g4,c178499_g1,c178706_g1,c183170_g1,c183801_g1,c183951_g1,c187384_g1,c190186_g1,c190478_g1,c199309_g1,c200275_g2,c201128_g2,c201154_g1,c205244_g1,c205274_g1,c208353_g1,c208493_g1,c208856_g1,c209306_g1,c209679_g1,c210307_g1,c210869_g1,c212009_g1,c212806_g3,c212969_g1,c214024_g1,c214701_g1,c215387_g2,c21…	MF	0.00057	0.002109	83	1918	3
GO:0005544	calcium-dependent phospholipid binding	c208612_g1,c77158_g1,c91450_g1	MF	0.00059	0.00198455	3	6	5
GO:0035639	purine ribonucleoside triphosphate binding	c109670_g1,c130530_g1,c137070_g1,c137673_g1,c144091_g1,c169660_g1,c171256_g1,c174451_g1,c177784_g4,c178499_g1,c178706_g1,c183170_g1,c183801_g1,c183951_g1,c187384_g1,c190186_g1,c190478_g1,c199309_g1,c200275_g2,c201128_g2,c201154_g1,c205244_g1,c205274_g1,c208353_g1,c208493_g1,c208856_g1,c209306_g1,c210307_g1,c210869_g1,c212009_g1,c212806_g3,c212969_g1,c214024_g1,c214701_g1,c215387_g2,c215597_g5,c21…	MF	0.00068	0.00209667	82	1899	5
GO:1901363	heterocyclic compound binding	c101851_g1,c109670_g1,c130530_g1,c137070_g1,c137673_g1,c144091_g1,c149262_g1,c169660_g1,c169718_g1,c171256_g1,c174451_g1,c174811_g1,c176626_g1,c177784_g4,c178499_g1,c178706_g1,c179665_g1,c183170_g1,c183801_g1,c183951_g1,c186568_g1,c187384_g1,c190186_g1,c190478_g1,c193956_g1,c193956_g2,c196744_g1,c199073_g1,c199309_g1,c199464_g2,c199538_g1,c199742_g1,c200275_g2,c201115_g1,c201128_g2,c201154_g1,c20…	MF	0.00074	0.00210615	113	2831	3
GO:0005543	phospholipid binding	c188121_g1,c208612_g1,c77158_g1,c91450_g1	MF	0.00077	0.002035	4	14	4
GO:0097159	organic cyclic compound binding	c101851_g1,c109670_g1,c130530_g1,c137070_g1,c137673_g1,c144091_g1,c149262_g1,c169660_g1,c169718_g1,c171256_g1,c174451_g1,c174811_g1,c176626_g1,c177784_g4,c178499_g1,c178706_g1,c179665_g1,c183170_g1,c183801_g1,c183951_g1,c186568_g1,c187384_g1,c190186_g1,c190478_g1,c193956_g1,c193956_g2,c196744_g1,c199073_g1,c199309_g1,c199464_g2,c199538_g1,c199742_g1,c200275_g2,c201115_g1,c201128_g2,c201154_g1,c20…	MF	0.00083	0.00204733	113	2838	3
GO:0017076	purine nucleotide binding	c109670_g1,c130530_g1,c137070_g1,c137673_g1,c144091_g1,c169660_g1,c171256_g1,c174451_g1,c177784_g4,c178499_g1,c178706_g1,c183170_g1,c183801_g1,c183951_g1,c187384_g1,c190186_g1,c190478_g1,c199309_g1,c200275_g2,c201128_g2,c201154_g1,c205244_g1,c205274_g1,c208353_g1,c208493_g1,c208856_g1,c209306_g1,c210307_g1,c210869_g1,c212009_g1,c212806_g3,c212969_g1,c214024_g1,c214701_g1,c215387_g2,c215597_g5,c21…	MF	0.00084	0.00188364	82	1911	5
GO:0032555	purine ribonucleotide binding	c109670_g1,c130530_g1,c137070_g1,c137673_g1,c144091_g1,c169660_g1,c171256_g1,c174451_g1,c177784_g4,c178499_g1,c178706_g1,c183170_g1,c183801_g1,c183951_g1,c187384_g1,c190186_g1,c190478_g1,c199309_g1,c200275_g2,c201128_g2,c201154_g1,c205244_g1,c205274_g1,c208353_g1,c208493_g1,c208856_g1,c209306_g1,c210307_g1,c210869_g1,c212009_g1,c212806_g3,c212969_g1,c214024_g1,c214701_g1,c215387_g2,c215597_g5,c21…	MF	0.00084	0.00188364	82	1911	5
GO:0032553	ribonucleotide binding	c109670_g1,c130530_g1,c137070_g1,c137673_g1,c144091_g1,c169660_g1,c171256_g1,c174451_g1,c177784_g4,c178499_g1,c178706_g1,c183170_g1,c183801_g1,c183951_g1,c187384_g1,c190186_g1,c190478_g1,c199309_g1,c200275_g2,c201128_g2,c201154_g1,c205244_g1,c205274_g1,c208353_g1,c208493_g1,c208856_g1,c209306_g1,c210307_g1,c210869_g1,c212009_g1,c212806_g3,c212969_g1,c214024_g1,c214701_g1,c215387_g2,c215597_g5,c21…	MF	0.00086	0.00176778	82	1912	4
GO:0036094	small molecule binding	c109670_g1,c130530_g1,c137070_g1,c137673_g1,c144091_g1,c169660_g1,c171256_g1,c174451_g1,c177784_g4,c178499_g1,c178706_g1,c183170_g1,c183801_g1,c183951_g1,c187384_g1,c190186_g1,c190478_g1,c199309_g1,c200275_g2,c200960_g1,c201128_g2,c201154_g1,c205244_g1,c205274_g1,c208353_g1,c208493_g1,c208856_g1,c209306_g1,c210307_g1,c210869_g1,c212009_g1,c212806_g3,c212969_g1,c214024_g1,c214701_g1,c215387_g2,c21…	MF	0.00106	0.00206421	84	1983	3
GO:0000166	nucleotide binding	c109670_g1,c130530_g1,c137070_g1,c137673_g1,c144091_g1,c169660_g1,c171256_g1,c174451_g1,c177784_g4,c178499_g1,c178706_g1,c183170_g1,c183801_g1,c183951_g1,c187384_g1,c190186_g1,c190478_g1,c199309_g1,c200275_g2,c201128_g2,c201154_g1,c205244_g1,c205274_g1,c208353_g1,c208493_g1,c208856_g1,c209306_g1,c210307_g1,c210869_g1,c212009_g1,c212806_g3,c212969_g1,c214024_g1,c214701_g1,c215387_g2,c215597_g5,c21…	MF	0.00178	0.00321268	82	1956	4
GO:1901265	nucleoside phosphate binding	c109670_g1,c130530_g1,c137070_g1,c137673_g1,c144091_g1,c169660_g1,c171256_g1,c174451_g1,c177784_g4,c178499_g1,c178706_g1,c183170_g1,c183801_g1,c183951_g1,c187384_g1,c190186_g1,c190478_g1,c199309_g1,c200275_g2,c201128_g2,c201154_g1,c205244_g1,c205274_g1,c208353_g1,c208493_g1,c208856_g1,c209306_g1,c210307_g1,c210869_g1,c212009_g1,c212806_g3,c212969_g1,c214024_g1,c214701_g1,c215387_g2,c215597_g5,c21…	MF	0.00178	0.00321268	82	1956	4
GO:0051213	dioxygenase activity	c197215_g1,c197313_g1,c201297_g1,c209294_g1,c221224_g6,c226586_g1,c228956_g1,c230416_g2	MF	0.00224	0.00376727	8	74	4
GO:0016881	acid-amino acid ligase activity	c137673_g1,c183170_g1,c229555_g4	MF	0.00229	0.00368391	3	9	5
GO:0008289	lipid binding	c179279_g2,c188121_g1,c200960_g1,c208612_g1,c222514_g6,c249905_g1,c77158_g1,c91450_g1	MF	0.00244	0.00376167	8	75	3
GO:0016773	phosphotransferase activity, alcohol group as acceptor	c109670_g1,c137070_g1,c169660_g1,c171256_g1,c178499_g1,c183801_g1,c190186_g1,c190478_g1,c199309_g1,c205244_g1,c208856_g1,c209306_g1,c210307_g1,c212009_g1,c212806_g3,c214701_g1,c215387_g2,c215597_g5,c217578_g1,c220503_g1,c220756_g1,c221095_g1,c222203_g1,c223712_g3,c224200_g3,c226320_g1,c227294_g1,c228400_g1,c228439_g3,c230056_g2,c230504_g2,c230703_g2,c230720_g1,c231373_g1,c231786_g1,c249905_g1,c28…	MF	0.00269	0.0039812	37	734	5
GO:0016772	transferase activity, transferring phosphorus-containing groups	c109670_g1,c137070_g1,c169660_g1,c171256_g1,c178499_g1,c183801_g1,c190186_g1,c190478_g1,c196744_g1,c199309_g1,c200275_g2,c205244_g1,c205274_g1,c208856_g1,c209306_g1,c210056_g2,c210307_g1,c212009_g1,c212806_g3,c214701_g1,c215387_g2,c215597_g5,c217578_g1,c220503_g1,c220756_g1,c221095_g1,c221444_g1,c222203_g1,c223158_g2,c223158_g3,c223712_g3,c224200_g3,c224960_g1,c226320_g1,c227294_g1,c228400_g1,c22…	MF	0.00324	0.00461077	46	979	4
GO:0016301	kinase activity	c109670_g1,c137070_g1,c169660_g1,c171256_g1,c178499_g1,c183801_g1,c190186_g1,c190478_g1,c199309_g1,c200275_g2,c205244_g1,c205274_g1,c208856_g1,c209306_g1,c210307_g1,c212009_g1,c212806_g3,c214701_g1,c215387_g2,c215597_g5,c217578_g1,c220503_g1,c220756_g1,c221095_g1,c222203_g1,c223712_g3,c224200_g3,c224960_g1,c226320_g1,c227294_g1,c228400_g1,c228439_g3,c230056_g2,c230504_g2,c230703_g2,c230720_g1,c23…	MF	0.00339	0.00464556	40	822	5
GO:0030246	carbohydrate binding	c178499_g1,c199309_g1,c205244_g1,c220756_g1,c222203_g1,c223391_g3,c227294_g1,c231786_g1	MF	0.00426	0.00562929	8	82	3
GO:0033764	steroid dehydrogenase activity, acting on the CH-OH group of donors, NAD or NADP as acceptor	c217911_g1,c226008_g1	MF	0.00576	0.00722441	2	4	5
GO:0070524	11-beta-hydroxysteroid dehydrogenase (NADP+) activity	c217911_g1,c226008_g1	MF	0.00576	0.00722441	2	4	6
GO:0016840	carbon-nitrogen lyase activity	c100946_g1,c197233_g1,c230536_g2	MF	0.00884	0.010551	3	14	4
GO:0004652	polynucleotide adenylyltransferase activity	c223158_g2,c223158_g3	MF	0.0094	0.0108687	2	5	7
GO:0016841	ammonia-lyase activity	c100946_g1,c230536_g2	MF	0.0138	0.0154727	2	6	5
GO:0016229	steroid dehydrogenase activity	c217911_g1,c226008_g1	MF	0.02471	0.0268903	2	8	4
GO:0004568	chitinase activity	c199907_g1,c209679_g1	MF	0.03809	0.0396994	2	10	6
GO:0032452	histone demethylase activity	c197313_g1,c221224_g6	MF	0.03809	0.0396994	2	10	4
GO:0005516	calmodulin binding	c100672_g1,c178499_g1,c179665_g1,c205244_g1,c214633_g1,c215875_g1,c220756_g1,c222203_g1	MF	0.03954	0.03954	8	122	4
GO:0030904	retromer complex	c179279_g2,c222514_g6	CC	0.0024	0.024	2	3	3
GO:0005681	spliceosomal complex	c174811_g1,c187930_g1,c199538_g1,c201115_g1,c211332_g2,c212424_g5,c224992_g1	CC	0.0032	0.016	7	68	5
GO:0016604	nuclear body	c200275_g2,c201115_g1,c211332_g2,c212424_g5,c212965_g3,c224992_g1	CC	0.0061	0.0203333	6	58	6
GO:0005634	nucleus	c101851_g1,c149262_g1,c169718_g1,c174811_g1,c176626_g1,c178706_g1,c179665_g1,c180943_g1,c181135_g1,c184292_g1,c186568_g1,c187930_g1,c188121_g1,c193956_g1,c193956_g2,c197313_g1,c199073_g1,c199464_g2,c199538_g1,c200275_g2,c200623_g2,c200623_g3,c200960_g1,c201115_g1,c203513_g1,c204216_g1,c205089_g10,c205096_g1,c206160_g1,c208353_g1,c209991_g1,c211218_g1,c211332_g2,c212424_g5,c212806_g3,c212965_g3,c2…	CC	0.0095	0.02375	62	1644	5
GO:0016607	nuclear speck	c201115_g1,c211332_g2,c212424_g5,c212965_g3,c224992_g1	CC	0.0138	0.0276	5	50	7
GO:0005886	plasma membrane	c100672_g1,c137164_g1,c170672_g1,c178499_g1,c188121_g1,c190186_g1,c201229_g1,c205244_g1,c205274_g1,c205898_g2,c209306_g1,c210307_g1,c211218_g1,c212009_g1,c212806_g3,c214633_g1,c216099_g1,c219006_g4,c220503_g1,c220756_g1,c221095_g1,c222203_g1,c223712_g3,c226320_g1,c227294_g1,c228400_g1,c228439_g3,c228703_g2,c230056_g2,c230703_g2,c230720_g1,c249905_g1,c252984_g1,c267154_g1	CC	0.0252	0.042	34	845	3
GO:0005811	lipid droplet	c217911_g1,c226008_g1	CC	0.0317	0.0452857	2	10	5
GO:0044451	nucleoplasm part	c200275_g2,c201115_g1,c211332_g2,c212424_g5,c212965_g3,c224992_g1,c229930_g1	CC	0.0339	0.042375	7	107	5
GO:0005654	nucleoplasm	c181135_g1,c200275_g2,c201115_g1,c211332_g2,c212424_g5,c212965_g3,c224992_g1,c229930_g1	CC	0.0387	0.043	8	134	5
GO:0071944	cell periphery	c100672_g1,c108857_g1,c137164_g1,c170672_g1,c178499_g1,c188121_g1,c190186_g1,c201229_g1,c205244_g1,c205274_g1,c205898_g2,c209306_g1,c210307_g1,c211218_g1,c212009_g1,c212806_g3,c214633_g1,c216099_g1,c219006_g4,c220503_g1,c220756_g1,c221095_g1,c222203_g1,c223712_g3,c226320_g1,c227294_g1,c228400_g1,c228425_g1,c228439_g3,c228703_g2,c230056_g2,c230703_g2,c230720_g1,c249905_g1,c252984_g1,c267154_g1,c66…	CC	0.0459	0.0459	37	979	3

## Sheet: DS3_Down
GO_accession	Description	GeneNames	Ontology	pValue	qValue	fg	bg	GO_level
GO:0042743	hydrogen peroxide metabolic process	c211663_g2,c215086_g7,c225503_g1,c227294_g1,c230956_g1	BP	0.00045	0.0441	5	41	5
GO:0009987	cellular process	c101851_g1,c108857_g1,c144091_g1,c153220_g1,c158109_g1,c158760_g1,c169660_g1,c171109_g1,c171256_g1,c174811_g1,c177784_g4,c178499_g1,c181135_g1,c183170_g1,c183801_g1,c184292_g1,c186568_g1,c193956_g1,c193956_g2,c197215_g1,c199538_g1,c199907_g1,c201115_g1,c201128_g2,c201228_g1,c201297_g1,c203513_g1,c205089_g10,c205244_g1,c205898_g2,c206036_g1,c206160_g1,c206962_g1,c208353_g1,c208856_g1,c209294_g1,c2…	BP	0.00062	0.03038	84	4267	2
GO:0061077	chaperone-mediated protein folding	c144091_g1,c225186_g1	BP	0.00075	0.0245	2	3	4
GO:0072593	reactive oxygen species metabolic process	c211663_g2,c215086_g7,c225503_g1,c227294_g1,c230956_g1	BP	0.00078	0.01911	5	46	4
GO:0031407	oxylipin metabolic process	c209294_g1,c226586_g1,c228956_g1,c230416_g2	BP	0.00082	0.0146109	4	27	6
GO:0031408	oxylipin biosynthetic process	c209294_g1,c226586_g1,c228956_g1,c230416_g2	BP	0.00082	0.0146109	4	27	7
GO:0009266	response to temperature stimulus	c141087_g1,c201128_g2,c210307_g1,c218321_g1,c220213_g3,c221095_g1	BP	0.0012	0.0168	6	75	4
GO:0006952	defense response	c113841_g1,c144091_g1,c155953_g1,c199538_g1,c209306_g1,c223391_g2,c223391_g3,c224960_g1,c225186_g1,c225422_g2,c226320_g1,c227294_g1,c228439_g3,c231786_g1	BP	0.00124	0.01519	14	349	4
GO:0009607	response to biotic stimulus	c113841_g1,c144091_g1,c155953_g1,c181135_g1,c210307_g1,c221095_g1,c225186_g1,c227294_g1	BP	0.00143	0.0155711	8	136	3
GO:0006950	response to stress	c113841_g1,c141087_g1,c144091_g1,c155953_g1,c181135_g1,c199538_g1,c201128_g2,c209306_g1,c210307_g1,c218321_g1,c220213_g3,c221095_g1,c223391_g2,c223391_g3,c224960_g1,c225186_g1,c225422_g2,c226320_g1,c227294_g1,c228439_g3,c231786_g1	BP	0.00147	0.014406	21	658	3
GO:0006457	protein folding	c144091_g1,c225186_g1	BP	0.00149	0.0132745	2	4	3
GO:0044237	cellular metabolic process	c101851_g1,c153220_g1,c158760_g1,c169660_g1,c171109_g1,c171256_g1,c174811_g1,c177784_g4,c178499_g1,c181135_g1,c183170_g1,c183801_g1,c184292_g1,c186568_g1,c193956_g1,c193956_g2,c197215_g1,c199538_g1,c199907_g1,c201115_g1,c201128_g2,c201297_g1,c203513_g1,c205089_g10,c205244_g1,c206036_g1,c206160_g1,c208856_g1,c209294_g1,c209306_g1,c209679_g1,c210307_g1,c210974_g1,c211332_g2,c211663_g2,c214024_g1,c2…	BP	0.00155	0.0126583	73	3603	3
GO:0016310	phosphorylation	c158760_g1,c169660_g1,c171256_g1,c178499_g1,c183801_g1,c205244_g1,c208856_g1,c209306_g1,c210307_g1,c215597_g5,c220503_g1,c221095_g1,c222203_g1,c224960_g1,c226320_g1,c227294_g1,c228400_g1,c228439_g3,c230056_g2,c230504_g2,c230703_g2,c230720_g1,c231786_g1,c249905_g1,c285304_g1	BP	0.0016	0.0120615	25	851	6
GO:0042744	hydrogen peroxide catabolic process	c211663_g2,c215086_g7,c225503_g1,c230956_g1	BP	0.00177	0.01239	4	33	6
GO:0017001	antibiotic catabolic process	c211663_g2,c215086_g7,c225503_g1,c230956_g1	BP	0.00221	0.0144387	4	35	5
GO:0042737	drug catabolic process	c199907_g1,c209679_g1,c211663_g2,c215086_g7,c225503_g1,c230956_g1	BP	0.00341	0.0208862	6	92	5
GO:0051187	cofactor catabolic process	c211663_g2,c215086_g7,c225503_g1,c230956_g1	BP	0.00364	0.0209835	4	40	5
GO:0000060	protein import into nucleus, translocation	c210307_g1,c221095_g1	BP	0.00365	0.0146	2	6	6
GO:0006606	protein import into nucleus	c210307_g1,c221095_g1	BP	0.00365	0.0146	2	6	6
GO:0009625	response to insect	c210307_g1,c221095_g1	BP	0.00365	0.0146	2	6	4
GO:0009816	defense response to bacterium, incompatible interaction	c144091_g1,c225186_g1	BP	0.00365	0.0146	2	6	6
GO:0033158	regulation of protein import into nucleus, translocation	c210307_g1,c221095_g1	BP	0.00365	0.0146	2	6	7
GO:0033160	positive regulation of protein import into nucleus, translocation	c210307_g1,c221095_g1	BP	0.00365	0.0146	2	6	6
GO:0042306	regulation of protein import into nucleus	c210307_g1,c221095_g1	BP	0.00365	0.0146	2	6	7
GO:0042307	positive regulation of protein import into nucleus	c210307_g1,c221095_g1	BP	0.00365	0.0146	2	6	5
GO:0046822	regulation of nucleocytoplasmic transport	c210307_g1,c221095_g1	BP	0.00365	0.0146	2	6	6
GO:0046824	positive regulation of nucleocytoplasmic transport	c210307_g1,c221095_g1	BP	0.00365	0.0146	2	6	5
GO:0051170	import into nucleus	c210307_g1,c221095_g1	BP	0.00365	0.0146	2	6	7
GO:1900180	regulation of protein localization to nucleus	c210307_g1,c221095_g1	BP	0.00365	0.0146	2	6	6
GO:1900182	positive regulation of protein localization to nucleus	c210307_g1,c221095_g1	BP	0.00365	0.0146	2	6	4
GO:1904591	positive regulation of protein import	c210307_g1,c221095_g1	BP	0.00365	0.0146	2	6	5
GO:0006796	phosphate-containing compound metabolic process	c158760_g1,c169660_g1,c171256_g1,c178499_g1,c183801_g1,c205244_g1,c208856_g1,c209306_g1,c210307_g1,c215597_g5,c220344_g3,c220503_g1,c221095_g1,c222203_g1,c224960_g1,c226320_g1,c227027_g2,c227294_g1,c228400_g1,c228439_g3,c230056_g2,c230504_g2,c230703_g2,c230720_g1,c231786_g1,c249905_g1,c285304_g1	BP	0.00465	0.0142406	27	1021	5
GO:0017038	protein import	c210307_g1,c221095_g1	BP	0.00506	0.0137744	2	7	6
GO:0032388	positive regulation of intracellular transport	c210307_g1,c221095_g1	BP	0.00506	0.0137744	2	7	4
GO:0051222	positive regulation of protein transport	c210307_g1,c221095_g1	BP	0.00506	0.0137744	2	7	4
GO:0090316	positive regulation of intracellular protein transport	c210307_g1,c221095_g1	BP	0.00506	0.0137744	2	7	4
GO:1903829	positive regulation of cellular protein localization	c210307_g1,c221095_g1	BP	0.00506	0.0137744	2	7	3
GO:1904589	regulation of protein import	c210307_g1,c221095_g1	BP	0.00506	0.0137744	2	7	7
GO:1904951	positive regulation of establishment of protein localization	c210307_g1,c221095_g1	BP	0.00506	0.0137744	2	7	3
GO:0009409	response to cold	c201128_g2,c210307_g1,c220213_g3,c221095_g1	BP	0.00603	0.0147735	4	46	4
GO:0006022	aminoglycan metabolic process	c199907_g1,c209679_g1	BP	0.00667	0.0129438	2	8	5
GO:0006026	aminoglycan catabolic process	c199907_g1,c209679_g1	BP	0.00667	0.0129438	2	8	6
GO:0006030	chitin metabolic process	c199907_g1,c209679_g1	BP	0.00667	0.0129438	2	8	5
GO:0006032	chitin catabolic process	c199907_g1,c209679_g1	BP	0.00667	0.0129438	2	8	6
GO:0006913	nucleocytoplasmic transport	c210307_g1,c221095_g1	BP	0.00667	0.0129438	2	8	6
GO:0032386	regulation of intracellular transport	c210307_g1,c221095_g1	BP	0.00667	0.0129438	2	8	5
GO:0032880	regulation of protein localization	c210307_g1,c221095_g1	BP	0.00667	0.0129438	2	8	4
GO:0033157	regulation of intracellular protein transport	c210307_g1,c221095_g1	BP	0.00667	0.0129438	2	8	6
GO:0034504	protein localization to nucleus	c210307_g1,c221095_g1	BP	0.00667	0.0129438	2	8	7
GO:0046348	amino sugar catabolic process	c199907_g1,c209679_g1	BP	0.00667	0.0129438	2	8	6
GO:0050826	response to freezing	c210307_g1,c221095_g1	BP	0.00667	0.0129438	2	8	5
GO:0051169	nuclear transport	c210307_g1,c221095_g1	BP	0.00667	0.0129438	2	8	5
GO:0051223	regulation of protein transport	c210307_g1,c221095_g1	BP	0.00667	0.0129438	2	8	6
GO:0060341	regulation of cellular localization	c210307_g1,c221095_g1	BP	0.00667	0.0129438	2	8	4
GO:0070201	regulation of establishment of protein localization	c210307_g1,c221095_g1	BP	0.00667	0.0129438	2	8	5
GO:0090087	regulation of peptide transport	c210307_g1,c221095_g1	BP	0.00667	0.0129438	2	8	5
GO:1901071	glucosamine-containing compound metabolic process	c199907_g1,c209679_g1	BP	0.00667	0.0129438	2	8	6
GO:1901072	glucosamine-containing compound catabolic process	c199907_g1,c209679_g1	BP	0.00667	0.0129438	2	8	7
GO:1901136	carbohydrate derivative catabolic process	c199907_g1,c209679_g1	BP	0.00667	0.0129438	2	8	5
GO:1903827	regulation of cellular protein localization	c210307_g1,c221095_g1	BP	0.00667	0.0129438	2	8	5
GO:0006793	phosphorus metabolic process	c158760_g1,c169660_g1,c171256_g1,c178499_g1,c183801_g1,c205244_g1,c208856_g1,c209306_g1,c210307_g1,c215597_g5,c220344_g3,c220503_g1,c221095_g1,c222203_g1,c224960_g1,c226320_g1,c227027_g2,c227294_g1,c228400_g1,c228439_g3,c230056_g2,c230504_g2,c230703_g2,c230720_g1,c231786_g1,c249905_g1,c285304_g1	BP	0.00746	0.0119849	27	1057	4
GO:0051050	positive regulation of transport	c210307_g1,c221095_g1	BP	0.00849	0.0134197	2	9	3
GO:0016999	antibiotic metabolic process	c211663_g2,c215086_g7,c225503_g1,c227294_g1,c230956_g1	BP	0.00934	0.0145289	5	81	5
GO:0009617	response to bacterium	c144091_g1,c181135_g1,c210307_g1,c221095_g1,c225186_g1	BP	0.01033	0.0158178	5	83	4
GO:0002237	response to molecule of bacterial origin	c210307_g1,c221095_g1	BP	0.0105	0.0157099	2	10	5
GO:0072594	establishment of protein localization to organelle	c210307_g1,c221095_g1	BP	0.0105	0.0157099	2	10	5
GO:0072330	monocarboxylic acid biosynthetic process	c158760_g1,c171109_g1,c197215_g1,c209294_g1,c226586_g1,c228956_g1,c230416_g2,c230536_g2	BP	0.01118	0.0163528	8	191	7
GO:0017144	drug metabolic process	c158760_g1,c199907_g1,c209679_g1,c211663_g2,c215086_g7,c216034_g4,c220344_g3,c225503_g1,c227027_g2,c227294_g1,c230956_g1	BP	0.01186	0.0170924	11	316	4
GO:0006040	amino sugar metabolic process	c199907_g1,c209679_g1	BP	0.0127	0.0180377	2	11	5
GO:0043207	response to external biotic stimulus	c144091_g1,c181135_g1,c210307_g1,c221095_g1,c225186_g1,c227294_g1	BP	0.01369	0.0190301	6	123	4
GO:0051707	response to other organism	c144091_g1,c181135_g1,c210307_g1,c221095_g1,c225186_g1,c227294_g1	BP	0.01369	0.0190301	6	123	3
GO:0006772	thiamine metabolic process	c220344_g3,c227027_g2	BP	0.01508	0.0201067	2	12	6
GO:0009228	thiamine biosynthetic process	c220344_g3,c227027_g2	BP	0.01508	0.0201067	2	12	7
GO:0042723	thiamine-containing compound metabolic process	c220344_g3,c227027_g2	BP	0.01508	0.0201067	2	12	5
GO:0042724	thiamine-containing compound biosynthetic process	c220344_g3,c227027_g2	BP	0.01508	0.0201067	2	12	6
GO:0019318	hexose metabolic process	c158760_g1,c229223_g1,c285304_g1	BP	0.01663	0.0214439	3	34	5
GO:0008610	lipid biosynthetic process	c171109_g1,c197215_g1,c201297_g1,c206036_g1,c209294_g1,c217911_g1,c220344_g3,c226586_g1,c228956_g1,c230416_g2	BP	0.0176	0.0224	10	291	5
GO:0006633	fatty acid biosynthetic process	c171109_g1,c209294_g1,c226586_g1,c228956_g1,c230416_g2	BP	0.01925	0.0241859	5	97	6
GO:0009814	defense response, incompatible interaction	c144091_g1,c225186_g1	BP	0.02036	0.0252567	2	14	5
GO:0006955	immune response	c144091_g1,c199538_g1,c225186_g1,c225422_g2	BP	0.02092	0.0254678	4	66	3
GO:0045087	innate immune response	c144091_g1,c199538_g1,c225186_g1,c225422_g2	BP	0.02092	0.0254678	4	66	4
GO:0050896	response to stimulus	c101851_g1,c113841_g1,c141087_g1,c144091_g1,c155953_g1,c181135_g1,c199538_g1,c201128_g2,c203513_g1,c205898_g2,c206962_g1,c209306_g1,c210307_g1,c218321_g1,c220213_g3,c221095_g1,c223391_g2,c223391_g3,c224960_g1,c225186_g1,c225422_g2,c226320_g1,c227294_g1,c228439_g3,c231786_g1	BP	0.02254	0.026938	25	1046	2
GO:0002376	immune system process	c144091_g1,c199538_g1,c225186_g1,c225422_g2	BP	0.02307	0.0272393	4	68	2
GO:0006886	intracellular protein transport	c210307_g1,c221095_g1	BP	0.02326	0.0269761	2	15	5
GO:0033365	protein localization to organelle	c210307_g1,c221095_g1	BP	0.02326	0.0269761	2	15	6
GO:0051186	cofactor metabolic process	c158760_g1,c183170_g1,c211663_g2,c215086_g7,c216034_g4,c225503_g1,c227027_g2,c227294_g1,c230956_g1	BP	0.03144	0.035827	9	275	4
GO:0044272	sulfur compound biosynthetic process	c183170_g1,c216034_g4,c220344_g3,c227027_g2	BP	0.03165	0.0356517	4	75	5
GO:0009605	response to external stimulus	c144091_g1,c181135_g1,c203513_g1,c210307_g1,c221095_g1,c225186_g1,c227294_g1	BP	0.03375	0.0375852	7	192	3
GO:0006006	glucose metabolic process	c158760_g1,c229223_g1	BP	0.03996	0.0440009	2	20	6
GO:0055114	oxidation-reduction process	c197215_g1,c201297_g1,c206036_g1,c207461_g2,c209294_g1,c210974_g1,c210991_g1,c211663_g2,c213266_g1,c213578_g2,c215086_g7,c216904_g1,c217911_g1,c220324_g1,c221224_g6,c225503_g1,c226586_g1,c228956_g1,c230416_g2,c230956_g1	BP	0.04	0.0435556	20	834	3
GO:0005996	monosaccharide metabolic process	c158760_g1,c229223_g1,c285304_g1	BP	0.04097	0.0441215	3	48	4
GO:0009628	response to abiotic stimulus	c141087_g1,c181135_g1,c201128_g2,c203513_g1,c210307_g1,c218321_g1,c220213_g3,c221095_g1	BP	0.04114	0.043823	8	244	3
GO:0008380	RNA splicing	c174811_g1,c199538_g1,c201115_g1,c211332_g2,c224992_g1	BP	0.0428	0.0451011	5	120	7
GO:0051704	multi-organism process	c144091_g1,c174451_g1,c181135_g1,c210307_g1,c221095_g1,c225186_g1,c227294_g1	BP	0.04653	0.04851	7	206	2
GO:0006750	glutathione biosynthetic process	c183170_g1	BP	0.04725	0.0484869	1	3	6
GO:0019184	nonribosomal peptide biosynthetic process	c183170_g1	BP	0.04725	0.0484869	1	3	7
GO:0034613	cellular protein localization	c210307_g1,c221095_g1	BP	0.0476	0.0478441	2	22	5
GO:0070727	cellular macromolecule localization	c210307_g1,c221095_g1	BP	0.0476	0.0478441	2	22	4
GO:0008144	drug binding	c144091_g1,c169660_g1,c171256_g1,c174451_g1,c177784_g4,c178499_g1,c183170_g1,c183801_g1,c201154_g1,c205244_g1,c208353_g1,c208493_g1,c208856_g1,c209306_g1,c209679_g1,c210307_g1,c214024_g1,c215597_g5,c216034_g4,c216809_g1,c217861_g4,c217861_g6,c218321_g1,c219591_g3,c220213_g3,c220503_g1,c221095_g1,c221222_g1,c222203_g1,c222353_g6,c223158_g2,c223158_g3,c224960_g1,c225082_g1,c225186_g1,c225648_g5,c22…	MF	3.7e-05	0.001332	50	1731	3
GO:0005524	ATP binding	c144091_g1,c169660_g1,c171256_g1,c174451_g1,c177784_g4,c178499_g1,c183170_g1,c183801_g1,c201154_g1,c205244_g1,c208353_g1,c208493_g1,c208856_g1,c209306_g1,c210307_g1,c214024_g1,c215597_g5,c216034_g4,c216809_g1,c217861_g4,c217861_g6,c218321_g1,c219591_g3,c220213_g3,c220503_g1,c221095_g1,c221222_g1,c222203_g1,c222353_g6,c223158_g2,c223158_g3,c224960_g1,c225082_g1,c225186_g1,c225648_g5,c225939_g2,c22…	MF	6.6e-05	0.001188	49	1717	4
GO:0030554	adenyl nucleotide binding	c144091_g1,c169660_g1,c171256_g1,c174451_g1,c177784_g4,c178499_g1,c183170_g1,c183801_g1,c201154_g1,c205244_g1,c208353_g1,c208493_g1,c208856_g1,c209306_g1,c210307_g1,c214024_g1,c215597_g5,c216034_g4,c216809_g1,c217861_g4,c217861_g6,c218321_g1,c219591_g3,c220213_g3,c220503_g1,c221095_g1,c221222_g1,c222203_g1,c222353_g6,c223158_g2,c223158_g3,c224960_g1,c225082_g1,c225186_g1,c225648_g5,c225939_g2,c22…	MF	8e-05	0.000822857	49	1729	6
GO:0032559	adenyl ribonucleotide binding	c144091_g1,c169660_g1,c171256_g1,c174451_g1,c177784_g4,c178499_g1,c183170_g1,c183801_g1,c201154_g1,c205244_g1,c208353_g1,c208493_g1,c208856_g1,c209306_g1,c210307_g1,c214024_g1,c215597_g5,c216034_g4,c216809_g1,c217861_g4,c217861_g6,c218321_g1,c219591_g3,c220213_g3,c220503_g1,c221095_g1,c221222_g1,c222203_g1,c222353_g6,c223158_g2,c223158_g3,c224960_g1,c225082_g1,c225186_g1,c225648_g5,c225939_g2,c22…	MF	8e-05	0.000822857	49	1729	6
GO:0036094	small molecule binding	c144091_g1,c169660_g1,c171256_g1,c174451_g1,c177784_g4,c178499_g1,c183170_g1,c183801_g1,c183951_g1,c200960_g1,c201128_g2,c201154_g1,c205244_g1,c208353_g1,c208493_g1,c208856_g1,c209306_g1,c210307_g1,c214024_g1,c215597_g5,c216034_g4,c216809_g1,c217861_g4,c217861_g6,c218321_g1,c219591_g3,c220213_g3,c220503_g1,c221095_g1,c221222_g1,c222203_g1,c222353_g6,c223158_g2,c223158_g3,c223391_g2,c223391_g3,c22…	MF	8.1e-05	0.0005832	54	1983	3
GO:0097367	carbohydrate derivative binding	c144091_g1,c169660_g1,c171256_g1,c174451_g1,c177784_g4,c178499_g1,c183170_g1,c183801_g1,c183951_g1,c201128_g2,c201154_g1,c205244_g1,c208353_g1,c208493_g1,c208856_g1,c209306_g1,c209679_g1,c210307_g1,c214024_g1,c215597_g5,c216034_g4,c216809_g1,c217861_g4,c217861_g6,c218321_g1,c219591_g3,c220213_g3,c220503_g1,c221095_g1,c221222_g1,c222203_g1,c222353_g6,c223158_g2,c223158_g3,c224960_g1,c225082_g1,c22…	MF	0.00014	0.00084	52	1918	3
GO:0035639	purine ribonucleoside triphosphate binding	c144091_g1,c169660_g1,c171256_g1,c174451_g1,c177784_g4,c178499_g1,c183170_g1,c183801_g1,c183951_g1,c201128_g2,c201154_g1,c205244_g1,c208353_g1,c208493_g1,c208856_g1,c209306_g1,c210307_g1,c214024_g1,c215597_g5,c216034_g4,c216809_g1,c217861_g4,c217861_g6,c218321_g1,c219591_g3,c220213_g3,c220503_g1,c221095_g1,c221222_g1,c222203_g1,c222353_g6,c223158_g2,c223158_g3,c224960_g1,c225082_g1,c225186_g1,c22…	MF	0.00022	0.00113143	51	1899	5
GO:0017076	purine nucleotide binding	c144091_g1,c169660_g1,c171256_g1,c174451_g1,c177784_g4,c178499_g1,c183170_g1,c183801_g1,c183951_g1,c201128_g2,c201154_g1,c205244_g1,c208353_g1,c208493_g1,c208856_g1,c209306_g1,c210307_g1,c214024_g1,c215597_g5,c216034_g4,c216809_g1,c217861_g4,c217861_g6,c218321_g1,c219591_g3,c220213_g3,c220503_g1,c221095_g1,c221222_g1,c222203_g1,c222353_g6,c223158_g2,c223158_g3,c224960_g1,c225082_g1,c225186_g1,c22…	MF	0.00026	0.00110118	51	1911	5
GO:0032555	purine ribonucleotide binding	c144091_g1,c169660_g1,c171256_g1,c174451_g1,c177784_g4,c178499_g1,c183170_g1,c183801_g1,c183951_g1,c201128_g2,c201154_g1,c205244_g1,c208353_g1,c208493_g1,c208856_g1,c209306_g1,c210307_g1,c214024_g1,c215597_g5,c216034_g4,c216809_g1,c217861_g4,c217861_g6,c218321_g1,c219591_g3,c220213_g3,c220503_g1,c221095_g1,c221222_g1,c222203_g1,c222353_g6,c223158_g2,c223158_g3,c224960_g1,c225082_g1,c225186_g1,c22…	MF	0.00026	0.00110118	51	1911	5
GO:0032553	ribonucleotide binding	c144091_g1,c169660_g1,c171256_g1,c174451_g1,c177784_g4,c178499_g1,c183170_g1,c183801_g1,c183951_g1,c201128_g2,c201154_g1,c205244_g1,c208353_g1,c208493_g1,c208856_g1,c209306_g1,c210307_g1,c214024_g1,c215597_g5,c216034_g4,c216809_g1,c217861_g4,c217861_g6,c218321_g1,c219591_g3,c220213_g3,c220503_g1,c221095_g1,c221222_g1,c222203_g1,c222353_g6,c223158_g2,c223158_g3,c224960_g1,c225082_g1,c225186_g1,c22…	MF	0.00027	0.000883636	51	1912	4
GO:0043168	anion binding	c144091_g1,c169660_g1,c171256_g1,c174451_g1,c177784_g4,c178499_g1,c183170_g1,c183801_g1,c183951_g1,c200960_g1,c201128_g2,c201154_g1,c205244_g1,c208353_g1,c208493_g1,c208856_g1,c209306_g1,c210307_g1,c214024_g1,c215597_g5,c216034_g4,c216809_g1,c217861_g4,c217861_g6,c218321_g1,c219591_g3,c220213_g3,c220503_g1,c221095_g1,c221222_g1,c222203_g1,c222353_g6,c223158_g2,c223158_g3,c224960_g1,c225082_g1,c22…	MF	0.00027	0.000883636	52	1964	4
GO:0051213	dioxygenase activity	c197215_g1,c201297_g1,c209294_g1,c221224_g6,c226586_g1,c228956_g1,c230416_g2	MF	0.00027	0.000883636	7	74	4
GO:0000166	nucleotide binding	c144091_g1,c169660_g1,c171256_g1,c174451_g1,c177784_g4,c178499_g1,c183170_g1,c183801_g1,c183951_g1,c201128_g2,c201154_g1,c205244_g1,c208353_g1,c208493_g1,c208856_g1,c209306_g1,c210307_g1,c214024_g1,c215597_g5,c216034_g4,c216809_g1,c217861_g4,c217861_g6,c218321_g1,c219591_g3,c220213_g3,c220503_g1,c221095_g1,c221222_g1,c222203_g1,c222353_g6,c223158_g2,c223158_g3,c224960_g1,c225082_g1,c225186_g1,c22…	MF	0.00049	0.00130667	51	1956	4
GO:1901265	nucleoside phosphate binding	c144091_g1,c169660_g1,c171256_g1,c174451_g1,c177784_g4,c178499_g1,c183170_g1,c183801_g1,c183951_g1,c201128_g2,c201154_g1,c205244_g1,c208353_g1,c208493_g1,c208856_g1,c209306_g1,c210307_g1,c214024_g1,c215597_g5,c216034_g4,c216809_g1,c217861_g4,c217861_g6,c218321_g1,c219591_g3,c220213_g3,c220503_g1,c221095_g1,c221222_g1,c222203_g1,c222353_g6,c223158_g2,c223158_g3,c224960_g1,c225082_g1,c225186_g1,c22…	MF	0.00049	0.00130667	51	1956	4
GO:0030246	carbohydrate binding	c178499_g1,c205244_g1,c222203_g1,c223391_g2,c223391_g3,c227294_g1,c231786_g1	MF	0.00051	0.001224	7	82	3
GO:1901363	heterocyclic compound binding	c101851_g1,c144091_g1,c169660_g1,c171256_g1,c174451_g1,c174811_g1,c177784_g4,c178499_g1,c183170_g1,c183801_g1,c183951_g1,c186568_g1,c193956_g1,c193956_g2,c199538_g1,c199742_g1,c201115_g1,c201128_g2,c201154_g1,c203513_g1,c205089_g10,c205244_g1,c206160_g1,c208353_g1,c208493_g1,c208856_g1,c209306_g1,c210307_g1,c211332_g2,c214024_g1,c215597_g5,c216034_g4,c216809_g1,c217861_g4,c217861_g6,c218321_g1,c2…	MF	0.00055	0.0012375	67	2831	3
GO:0004674	protein serine/threonine kinase activity	c169660_g1,c171256_g1,c178499_g1,c183801_g1,c205244_g1,c208856_g1,c209306_g1,c210307_g1,c215597_g5,c220503_g1,c221095_g1,c222203_g1,c226320_g1,c227294_g1,c228400_g1,c228439_g3,c230056_g2,c230504_g2,c230703_g2,c230720_g1,c231786_g1,c249905_g1	MF	0.00058	0.00122824	22	603	5
GO:0097159	organic cyclic compound binding	c101851_g1,c144091_g1,c169660_g1,c171256_g1,c174451_g1,c174811_g1,c177784_g4,c178499_g1,c183170_g1,c183801_g1,c183951_g1,c186568_g1,c193956_g1,c193956_g2,c199538_g1,c199742_g1,c201115_g1,c201128_g2,c201154_g1,c203513_g1,c205089_g10,c205244_g1,c206160_g1,c208353_g1,c208493_g1,c208856_g1,c209306_g1,c210307_g1,c211332_g2,c214024_g1,c215597_g5,c216034_g4,c216809_g1,c217861_g4,c217861_g6,c218321_g1,c2…	MF	0.00059	0.00118	67	2838	3
GO:0005488	binding	c101851_g1,c144091_g1,c169660_g1,c171256_g1,c174451_g1,c174811_g1,c177784_g4,c178499_g1,c181135_g1,c183170_g1,c183801_g1,c183951_g1,c186568_g1,c193956_g1,c193956_g2,c197215_g1,c199538_g1,c199742_g1,c200960_g1,c201115_g1,c201128_g2,c201154_g1,c201228_g1,c201297_g1,c203513_g1,c205089_g10,c205244_g1,c206160_g1,c207461_g2,c208353_g1,c208493_g1,c208856_g1,c209294_g1,c209306_g1,c209679_g1,c210307_g1,c2…	MF	0.00091	0.00172421	94	4520	2
GO:0004672	protein kinase activity	c169660_g1,c171256_g1,c178499_g1,c183801_g1,c205244_g1,c208856_g1,c209306_g1,c210307_g1,c215597_g5,c220503_g1,c221095_g1,c222203_g1,c226320_g1,c227294_g1,c228400_g1,c228439_g3,c230056_g2,c230504_g2,c230703_g2,c230720_g1,c231786_g1,c249905_g1	MF	0.00096	0.001728	22	626	4
GO:0043167	ion binding	c144091_g1,c169660_g1,c171256_g1,c174451_g1,c177784_g4,c178499_g1,c183170_g1,c183801_g1,c183951_g1,c193956_g1,c193956_g2,c197215_g1,c200960_g1,c201128_g2,c201154_g1,c201228_g1,c201297_g1,c205244_g1,c207461_g2,c208353_g1,c208493_g1,c208856_g1,c209294_g1,c209306_g1,c210307_g1,c211663_g2,c211938_g1,c214024_g1,c215086_g7,c215597_g5,c216034_g4,c216099_g1,c216791_g1,c216809_g1,c217861_g4,c217861_g6,c21…	MF	0.00111	0.00190286	75	3356	3
GO:0004652	polynucleotide adenylyltransferase activity	c223158_g2,c223158_g3	MF	0.00288	0.00471273	2	5	7
GO:0016773	phosphotransferase activity, alcohol group as acceptor	c169660_g1,c171256_g1,c178499_g1,c183801_g1,c205244_g1,c208856_g1,c209306_g1,c210307_g1,c215597_g5,c220503_g1,c221095_g1,c222203_g1,c226320_g1,c227294_g1,c228400_g1,c228439_g3,c230056_g2,c230504_g2,c230703_g2,c230720_g1,c231786_g1,c249905_g1,c285304_g1	MF	0.00332	0.00519652	23	734	5
GO:0016301	kinase activity	c169660_g1,c171256_g1,c178499_g1,c183801_g1,c205244_g1,c208856_g1,c209306_g1,c210307_g1,c215597_g5,c220503_g1,c221095_g1,c222203_g1,c224960_g1,c226320_g1,c227294_g1,c228400_g1,c228439_g3,c230056_g2,c230504_g2,c230703_g2,c230720_g1,c231786_g1,c249905_g1,c285304_g1	MF	0.00661	0.009915	24	822	5
GO:0004568	chitinase activity	c199907_g1,c209679_g1	MF	0.01225	0.0172941	2	10	6
GO:0004601	peroxidase activity	c211663_g2,c215086_g7,c225503_g1,c230956_g1	MF	0.01225	0.0172941	4	52	3
GO:0016846	carbon-sulfur lyase activity	c211787_g1,c221387_g1,c223137_g5	MF	0.01467	0.01956	3	30	4
GO:0016684	oxidoreductase activity, acting on peroxide as acceptor	c211663_g2,c215086_g7,c225503_g1,c230956_g1	MF	0.01484	0.01908	4	55	4
GO:0016772	transferase activity, transferring phosphorus-containing groups	c169660_g1,c171256_g1,c178499_g1,c183801_g1,c205244_g1,c208856_g1,c209306_g1,c210307_g1,c215597_g5,c220503_g1,c221095_g1,c222203_g1,c223158_g2,c223158_g3,c224960_g1,c226320_g1,c227294_g1,c228400_g1,c228439_g3,c230056_g2,c230504_g2,c230703_g2,c230720_g1,c231786_g1,c249905_g1,c285304_g1	MF	0.01545	0.0191793	26	979	4
GO:0047654	alliin lyase activity	c211787_g1,c221387_g1	MF	0.02367	0.028404	2	14	5
GO:0048029	monosaccharide binding	c223391_g2,c223391_g3	MF	0.02701	0.0313665	2	15	4
GO:0016209	antioxidant activity	c211663_g2,c215086_g7,c225503_g1,c230956_g1	MF	0.02715	0.0305438	4	66	2
GO:0070566	adenylyltransferase activity	c223158_g2,c223158_g3	MF	0.03421	0.03732	2	17	6
GO:0016491	oxidoreductase activity	c197215_g1,c201297_g1,c206036_g1,c207461_g2,c209294_g1,c210974_g1,c210991_g1,c211663_g2,c213266_g1,c213578_g2,c215086_g7,c216904_g1,c217911_g1,c220324_g1,c221224_g6,c225503_g1,c226586_g1,c228956_g1,c230416_g2,c230956_g1	MF	0.04159	0.0440365	20	771	3
GO:0031625	ubiquitin protein ligase binding	c218321_g1,c222203_g1	MF	0.04622	0.046871	2	20	6
GO:0044389	ubiquitin-like protein ligase binding	c218321_g1,c222203_g1	MF	0.04622	0.046871	2	20	5
GO:0005681	spliceosomal complex	c174811_g1,c199538_g1,c201115_g1,c211332_g2,c224992_g1	CC	0.0038	0.0114	5	68	5
GO:0016607	nuclear speck	c201115_g1,c211332_g2,c224992_g1	CC	0.0414	0.0621	3	50	7
GO:0016363	nuclear matrix	c225173_g1	CC	0.0455	0.0455	1	3	5

## Sheet: Down
GO_accession	Description	GeneNames	Ontology	pValue	qValue	fg	bg	GO_level
GO:0009987	cellular process	c101851_g1,c108857_g1,c144091_g1,c153220_g1,c158109_g1,c158760_g1,c169660_g1,c171109_g1,c171256_g1,c174811_g1,c177784_g4,c178499_g1,c181135_g1,c183170_g1,c183801_g1,c184292_g1,c186568_g1,c193956_g1,c193956_g2,c197215_g1,c199538_g1,c199907_g1,c201115_g1,c201128_g2,c201228_g1,c201297_g1,c203513_g1,c205089_g10,c205244_g1,c205898_g2,c206036_g1,c206160_g1,c206962_g1,c208353_g1,c208856_g1,c209294_g1,c2…	BP	0.00019	0.01843	84	4267	2
GO:0042743	hydrogen peroxide metabolic process	c211663_g2,c215086_g7,c225503_g1,c227294_g1,c230956_g1	BP	0.00041	0.019885	5	41	5
GO:0044237	cellular metabolic process	c101851_g1,c153220_g1,c158760_g1,c169660_g1,c171109_g1,c171256_g1,c174811_g1,c177784_g4,c178499_g1,c181135_g1,c183170_g1,c183801_g1,c184292_g1,c186568_g1,c193956_g1,c193956_g2,c197215_g1,c199538_g1,c199907_g1,c201115_g1,c201128_g2,c201297_g1,c203513_g1,c205089_g10,c205244_g1,c206036_g1,c206160_g1,c208856_g1,c209294_g1,c209306_g1,c209679_g1,c210307_g1,c210974_g1,c211332_g2,c211663_g2,c214024_g1,c2…	BP	0.00066	0.02134	73	3603	3
GO:0072593	reactive oxygen species metabolic process	c211663_g2,c215086_g7,c225503_g1,c227294_g1,c230956_g1	BP	0.00071	0.0172175	5	46	4
GO:0061077	chaperone-mediated protein folding	c144091_g1,c225186_g1	BP	0.00072	0.013968	2	3	4
GO:0031407	oxylipin metabolic process	c209294_g1,c226586_g1,c228956_g1,c230416_g2	BP	0.00076	0.0113415	4	27	6
GO:0031408	oxylipin biosynthetic process	c209294_g1,c226586_g1,c228956_g1,c230416_g2	BP	0.00076	0.0113415	4	27	7
GO:0009266	response to temperature stimulus	c141087_g1,c201128_g2,c210307_g1,c218321_g1,c220213_g3,c221095_g1	BP	0.00109	0.0132163	6	75	4
GO:0016310	phosphorylation	c158760_g1,c169660_g1,c171256_g1,c178499_g1,c183801_g1,c205244_g1,c208856_g1,c209306_g1,c210307_g1,c215597_g5,c220503_g1,c221095_g1,c222203_g1,c224960_g1,c226320_g1,c227294_g1,c228400_g1,c228439_g3,c230056_g2,c230504_g2,c230703_g2,c230720_g1,c231786_g1,c249905_g1,c285304_g1	BP	0.0012	0.0129333	25	851	6
GO:0009607	response to biotic stimulus	c113841_g1,c144091_g1,c155953_g1,c181135_g1,c210307_g1,c221095_g1,c225186_g1,c227294_g1	BP	0.00126	0.012222	8	136	3
GO:0006457	protein folding	c144091_g1,c225186_g1	BP	0.00144	0.0126982	2	4	3
GO:0042744	hydrogen peroxide catabolic process	c211663_g2,c215086_g7,c225503_g1,c230956_g1	BP	0.00165	0.0133375	4	33	6
GO:0017001	antibiotic catabolic process	c211663_g2,c215086_g7,c225503_g1,c230956_g1	BP	0.00207	0.0154454	4	35	5
GO:0006950	response to stress	c113841_g1,c141087_g1,c144091_g1,c155953_g1,c181135_g1,c199538_g1,c201128_g2,c209306_g1,c210307_g1,c218321_g1,c220213_g3,c221095_g1,c223391_g3,c224960_g1,c225186_g1,c225422_g2,c226320_g1,c227294_g1,c228439_g3,c231786_g1	BP	0.00274	0.0189843	20	658	3
GO:0006952	defense response	c113841_g1,c144091_g1,c155953_g1,c199538_g1,c209306_g1,c223391_g3,c224960_g1,c225186_g1,c225422_g2,c226320_g1,c227294_g1,c228439_g3,c231786_g1	BP	0.00303	0.019594	13	349	4
GO:0042737	drug catabolic process	c199907_g1,c209679_g1,c211663_g2,c215086_g7,c225503_g1,c230956_g1	BP	0.0031	0.0187938	6	92	5
GO:0051187	cofactor catabolic process	c211663_g2,c215086_g7,c225503_g1,c230956_g1	BP	0.0034	0.0194	4	40	5
GO:0006796	phosphate-containing compound metabolic process	c158760_g1,c169660_g1,c171256_g1,c178499_g1,c183801_g1,c205244_g1,c208856_g1,c209306_g1,c210307_g1,c215597_g5,c220344_g3,c220503_g1,c221095_g1,c222203_g1,c224960_g1,c226320_g1,c227027_g2,c227294_g1,c228400_g1,c228439_g3,c230056_g2,c230504_g2,c230703_g2,c230720_g1,c231786_g1,c249905_g1,c285304_g1	BP	0.0035	0.0188611	27	1021	5
GO:0000060	protein import into nucleus, translocation	c210307_g1,c221095_g1	BP	0.00351	0.0133518	2	6	6
GO:0006606	protein import into nucleus	c210307_g1,c221095_g1	BP	0.00351	0.0133518	2	6	6
GO:0009625	response to insect	c210307_g1,c221095_g1	BP	0.00351	0.0133518	2	6	4
GO:0009816	defense response to bacterium, incompatible interaction	c144091_g1,c225186_g1	BP	0.00351	0.0133518	2	6	6
GO:0033158	regulation of protein import into nucleus, translocation	c210307_g1,c221095_g1	BP	0.00351	0.0133518	2	6	7
GO:0033160	positive regulation of protein import into nucleus, translocation	c210307_g1,c221095_g1	BP	0.00351	0.0133518	2	6	6
GO:0042306	regulation of protein import into nucleus	c210307_g1,c221095_g1	BP	0.00351	0.0133518	2	6	7
GO:0042307	positive regulation of protein import into nucleus	c210307_g1,c221095_g1	BP	0.00351	0.0133518	2	6	5
GO:0046822	regulation of nucleocytoplasmic transport	c210307_g1,c221095_g1	BP	0.00351	0.0133518	2	6	6
GO:0046824	positive regulation of nucleocytoplasmic transport	c210307_g1,c221095_g1	BP	0.00351	0.0133518	2	6	5
GO:0051170	import into nucleus	c210307_g1,c221095_g1	BP	0.00351	0.0133518	2	6	7
GO:1900180	regulation of protein localization to nucleus	c210307_g1,c221095_g1	BP	0.00351	0.0133518	2	6	6
GO:1900182	positive regulation of protein localization to nucleus	c210307_g1,c221095_g1	BP	0.00351	0.0133518	2	6	4
GO:1904591	positive regulation of protein import	c210307_g1,c221095_g1	BP	0.00351	0.0133518	2	6	5
GO:0017038	protein import	c210307_g1,c221095_g1	BP	0.00487	0.0131219	2	7	6
GO:0032388	positive regulation of intracellular transport	c210307_g1,c221095_g1	BP	0.00487	0.0131219	2	7	4
GO:0051222	positive regulation of protein transport	c210307_g1,c221095_g1	BP	0.00487	0.0131219	2	7	4
GO:0090316	positive regulation of intracellular protein transport	c210307_g1,c221095_g1	BP	0.00487	0.0131219	2	7	4
GO:1903829	positive regulation of cellular protein localization	c210307_g1,c221095_g1	BP	0.00487	0.0131219	2	7	3
GO:1904589	regulation of protein import	c210307_g1,c221095_g1	BP	0.00487	0.0131219	2	7	7
GO:1904951	positive regulation of establishment of protein localization	c210307_g1,c221095_g1	BP	0.00487	0.0131219	2	7	3
GO:0009409	response to cold	c201128_g2,c210307_g1,c220213_g3,c221095_g1	BP	0.00564	0.013677	4	46	4
GO:0006793	phosphorus metabolic process	c158760_g1,c169660_g1,c171256_g1,c178499_g1,c183801_g1,c205244_g1,c208856_g1,c209306_g1,c210307_g1,c215597_g5,c220344_g3,c220503_g1,c221095_g1,c222203_g1,c224960_g1,c226320_g1,c227027_g2,c227294_g1,c228400_g1,c228439_g3,c230056_g2,c230504_g2,c230703_g2,c230720_g1,c231786_g1,c249905_g1,c285304_g1	BP	0.00568	0.013438	27	1057	4
GO:0006022	aminoglycan metabolic process	c199907_g1,c209679_g1	BP	0.00643	0.0121109	2	8	5
GO:0006026	aminoglycan catabolic process	c199907_g1,c209679_g1	BP	0.00643	0.0121109	2	8	6
GO:0006030	chitin metabolic process	c199907_g1,c209679_g1	BP	0.00643	0.0121109	2	8	5
GO:0006032	chitin catabolic process	c199907_g1,c209679_g1	BP	0.00643	0.0121109	2	8	6
GO:0006913	nucleocytoplasmic transport	c210307_g1,c221095_g1	BP	0.00643	0.0121109	2	8	6
GO:0032386	regulation of intracellular transport	c210307_g1,c221095_g1	BP	0.00643	0.0121109	2	8	5
GO:0032880	regulation of protein localization	c210307_g1,c221095_g1	BP	0.00643	0.0121109	2	8	4
GO:0033157	regulation of intracellular protein transport	c210307_g1,c221095_g1	BP	0.00643	0.0121109	2	8	6
GO:0034504	protein localization to nucleus	c210307_g1,c221095_g1	BP	0.00643	0.0121109	2	8	7
GO:0046348	amino sugar catabolic process	c199907_g1,c209679_g1	BP	0.00643	0.0121109	2	8	6
GO:0050826	response to freezing	c210307_g1,c221095_g1	BP	0.00643	0.0121109	2	8	5
GO:0051169	nuclear transport	c210307_g1,c221095_g1	BP	0.00643	0.0121109	2	8	5
GO:0051223	regulation of protein transport	c210307_g1,c221095_g1	BP	0.00643	0.0121109	2	8	6
GO:0060341	regulation of cellular localization	c210307_g1,c221095_g1	BP	0.00643	0.0121109	2	8	4
GO:0070201	regulation of establishment of protein localization	c210307_g1,c221095_g1	BP	0.00643	0.0121109	2	8	5
GO:0090087	regulation of peptide transport	c210307_g1,c221095_g1	BP	0.00643	0.0121109	2	8	5
GO:1901071	glucosamine-containing compound metabolic process	c199907_g1,c209679_g1	BP	0.00643	0.0121109	2	8	6
GO:1901072	glucosamine-containing compound catabolic process	c199907_g1,c209679_g1	BP	0.00643	0.0121109	2	8	7
GO:1901136	carbohydrate derivative catabolic process	c199907_g1,c209679_g1	BP	0.00643	0.0121109	2	8	5
GO:1903827	regulation of cellular protein localization	c210307_g1,c221095_g1	BP	0.00643	0.0121109	2	8	5
GO:0051050	positive regulation of transport	c210307_g1,c221095_g1	BP	0.00818	0.0127977	2	9	3
GO:0016999	antibiotic metabolic process	c211663_g2,c215086_g7,c225503_g1,c227294_g1,c230956_g1	BP	0.00864	0.0133029	5	81	5
GO:0009617	response to bacterium	c144091_g1,c181135_g1,c210307_g1,c221095_g1,c225186_g1	BP	0.00955	0.0144742	5	83	4
GO:0072330	monocarboxylic acid biosynthetic process	c158760_g1,c171109_g1,c197215_g1,c209294_g1,c226586_g1,c228956_g1,c230416_g2,c230536_g2	BP	0.01003	0.0149678	8	191	7
GO:0002237	response to molecule of bacterial origin	c210307_g1,c221095_g1	BP	0.01012	0.0147615	2	10	5
GO:0072594	establishment of protein localization to organelle	c210307_g1,c221095_g1	BP	0.01012	0.0147615	2	10	5
GO:0017144	drug metabolic process	c158760_g1,c199907_g1,c209679_g1,c211663_g2,c215086_g7,c216034_g4,c220344_g3,c225503_g1,c227027_g2,c227294_g1,c230956_g1	BP	0.01035	0.014764	11	316	4
GO:0006040	amino sugar metabolic process	c199907_g1,c209679_g1	BP	0.01224	0.017207	2	11	5
GO:0043207	response to external biotic stimulus	c144091_g1,c181135_g1,c210307_g1,c221095_g1,c225186_g1,c227294_g1	BP	0.01254	0.0172536	6	123	4
GO:0051707	response to other organism	c144091_g1,c181135_g1,c210307_g1,c221095_g1,c225186_g1,c227294_g1	BP	0.01254	0.0172536	6	123	3
GO:0006772	thiamine metabolic process	c220344_g3,c227027_g2	BP	0.01454	0.0191888	2	12	6
GO:0009228	thiamine biosynthetic process	c220344_g3,c227027_g2	BP	0.01454	0.0191888	2	12	7
GO:0042723	thiamine-containing compound metabolic process	c220344_g3,c227027_g2	BP	0.01454	0.0191888	2	12	5
GO:0042724	thiamine-containing compound biosynthetic process	c220344_g3,c227027_g2	BP	0.01454	0.0191888	2	12	6
GO:0008610	lipid biosynthetic process	c171109_g1,c197215_g1,c201297_g1,c206036_g1,c209294_g1,c217911_g1,c220344_g3,c226586_g1,c228956_g1,c230416_g2	BP	0.01557	0.0198722	10	291	5
GO:0019318	hexose metabolic process	c158760_g1,c229223_g1,c285304_g1	BP	0.01581	0.0199165	3	34	5
GO:0006633	fatty acid biosynthetic process	c171109_g1,c209294_g1,c226586_g1,c228956_g1,c230416_g2	BP	0.01787	0.0222229	5	97	6
GO:0006955	immune response	c144091_g1,c199538_g1,c225186_g1,c225422_g2	BP	0.01965	0.0238256	4	66	3
GO:0045087	innate immune response	c144091_g1,c199538_g1,c225186_g1,c225422_g2	BP	0.01965	0.0238256	4	66	4
GO:0009814	defense response, incompatible interaction	c144091_g1,c225186_g1	BP	0.01965	0.0238256	2	14	5
GO:0002376	immune system process	c144091_g1,c199538_g1,c225186_g1,c225422_g2	BP	0.02168	0.0256459	4	68	2
GO:0006886	intracellular protein transport	c210307_g1,c221095_g1	BP	0.02244	0.026068	2	15	5
GO:0033365	protein localization to organelle	c210307_g1,c221095_g1	BP	0.02244	0.026068	2	15	6
GO:0051186	cofactor metabolic process	c158760_g1,c183170_g1,c211663_g2,c215086_g7,c216034_g4,c225503_g1,c227027_g2,c227294_g1,c230956_g1	BP	0.02824	0.0322268	9	275	4
GO:0044272	sulfur compound biosynthetic process	c183170_g1,c216034_g4,c220344_g3,c227027_g2	BP	0.02979	0.0336003	4	75	5
GO:0009605	response to external stimulus	c144091_g1,c181135_g1,c203513_g1,c210307_g1,c221095_g1,c225186_g1,c227294_g1	BP	0.03086	0.0344071	7	192	3
GO:0050896	response to stimulus	c101851_g1,c113841_g1,c141087_g1,c144091_g1,c155953_g1,c181135_g1,c199538_g1,c201128_g2,c203513_g1,c205898_g2,c206962_g1,c209306_g1,c210307_g1,c218321_g1,c220213_g3,c221095_g1,c223391_g3,c224960_g1,c225186_g1,c225422_g2,c226320_g1,c227294_g1,c228439_g3,c231786_g1	BP	0.03195	0.0352176	24	1046	2
GO:0009628	response to abiotic stimulus	c141087_g1,c181135_g1,c201128_g2,c203513_g1,c210307_g1,c218321_g1,c220213_g3,c221095_g1	BP	0.03737	0.0407291	8	244	3
GO:0006006	glucose metabolic process	c158760_g1,c229223_g1	BP	0.0386	0.0416022	2	20	6
GO:0005996	monosaccharide metabolic process	c158760_g1,c229223_g1,c285304_g1	BP	0.03906	0.0416354	3	48	4
GO:0008380	RNA splicing	c174811_g1,c199538_g1,c201115_g1,c211332_g2,c224992_g1	BP	0.03994	0.0421107	5	120	7
GO:0051704	multi-organism process	c144091_g1,c174451_g1,c181135_g1,c210307_g1,c221095_g1,c225186_g1,c227294_g1	BP	0.04268	0.0445157	7	206	2
GO:0034613	cellular protein localization	c210307_g1,c221095_g1	BP	0.04599	0.0472067	2	22	5
GO:0070727	cellular macromolecule localization	c210307_g1,c221095_g1	BP	0.04599	0.0472067	2	22	4
GO:0006750	glutathione biosynthetic process	c183170_g1	BP	0.04637	0.0466103	1	3	6
GO:0019184	nonribosomal peptide biosynthetic process	c183170_g1	BP	0.04637	0.0466103	1	3	7
GO:0008144	drug binding	c144091_g1,c169660_g1,c171256_g1,c174451_g1,c177784_g4,c178499_g1,c183170_g1,c183801_g1,c201154_g1,c205244_g1,c208353_g1,c208493_g1,c208856_g1,c209306_g1,c209679_g1,c210307_g1,c214024_g1,c215597_g5,c216034_g4,c216809_g1,c217861_g4,c217861_g6,c218321_g1,c219591_g3,c220213_g3,c220503_g1,c221095_g1,c221222_g1,c222203_g1,c222353_g6,c223158_g2,c223158_g3,c224960_g1,c225082_g1,c225186_g1,c225648_g5,c22…	MF	2.1e-05	0.00084	49	1731	3
GO:0005524	ATP binding	c144091_g1,c169660_g1,c171256_g1,c174451_g1,c177784_g4,c178499_g1,c183170_g1,c183801_g1,c201154_g1,c205244_g1,c208353_g1,c208493_g1,c208856_g1,c209306_g1,c210307_g1,c214024_g1,c215597_g5,c216034_g4,c216809_g1,c217861_g4,c217861_g6,c218321_g1,c219591_g3,c220213_g3,c220503_g1,c221095_g1,c221222_g1,c222203_g1,c222353_g6,c223158_g2,c223158_g3,c224960_g1,c225082_g1,c225186_g1,c225648_g5,c225939_g2,c22…	MF	3.9e-05	0.00078	48	1717	4
GO:0030554	adenyl nucleotide binding	c144091_g1,c169660_g1,c171256_g1,c174451_g1,c177784_g4,c178499_g1,c183170_g1,c183801_g1,c201154_g1,c205244_g1,c208353_g1,c208493_g1,c208856_g1,c209306_g1,c210307_g1,c214024_g1,c215597_g5,c216034_g4,c216809_g1,c217861_g4,c217861_g6,c218321_g1,c219591_g3,c220213_g3,c220503_g1,c221095_g1,c221222_g1,c222203_g1,c222353_g6,c223158_g2,c223158_g3,c224960_g1,c225082_g1,c225186_g1,c225648_g5,c225939_g2,c22…	MF	4.7e-05	0.000537143	48	1729	6
GO:0032559	adenyl ribonucleotide binding	c144091_g1,c169660_g1,c171256_g1,c174451_g1,c177784_g4,c178499_g1,c183170_g1,c183801_g1,c201154_g1,c205244_g1,c208353_g1,c208493_g1,c208856_g1,c209306_g1,c210307_g1,c214024_g1,c215597_g5,c216034_g4,c216809_g1,c217861_g4,c217861_g6,c218321_g1,c219591_g3,c220213_g3,c220503_g1,c221095_g1,c221222_g1,c222203_g1,c222353_g6,c223158_g2,c223158_g3,c224960_g1,c225082_g1,c225186_g1,c225648_g5,c225939_g2,c22…	MF	4.7e-05	0.000537143	48	1729	6
GO:0097367	carbohydrate derivative binding	c144091_g1,c169660_g1,c171256_g1,c174451_g1,c177784_g4,c178499_g1,c183170_g1,c183801_g1,c183951_g1,c201128_g2,c201154_g1,c205244_g1,c208353_g1,c208493_g1,c208856_g1,c209306_g1,c209679_g1,c210307_g1,c214024_g1,c215597_g5,c216034_g4,c216809_g1,c217861_g4,c217861_g6,c218321_g1,c219591_g3,c220213_g3,c220503_g1,c221095_g1,c221222_g1,c222203_g1,c222353_g6,c223158_g2,c223158_g3,c224960_g1,c225082_g1,c22…	MF	7.6e-05	0.000608	51	1918	3
GO:0036094	small molecule binding	c144091_g1,c169660_g1,c171256_g1,c174451_g1,c177784_g4,c178499_g1,c183170_g1,c183801_g1,c183951_g1,c200960_g1,c201128_g2,c201154_g1,c205244_g1,c208353_g1,c208493_g1,c208856_g1,c209306_g1,c210307_g1,c214024_g1,c215597_g5,c216034_g4,c216809_g1,c217861_g4,c217861_g6,c218321_g1,c219591_g3,c220213_g3,c220503_g1,c221095_g1,c221222_g1,c222203_g1,c222353_g6,c223158_g2,c223158_g3,c223391_g3,c224960_g1,c22…	MF	9e-05	0.0006	52	1983	3
GO:0035639	purine ribonucleoside triphosphate binding	c144091_g1,c169660_g1,c171256_g1,c174451_g1,c177784_g4,c178499_g1,c183170_g1,c183801_g1,c183951_g1,c201128_g2,c201154_g1,c205244_g1,c208353_g1,c208493_g1,c208856_g1,c209306_g1,c210307_g1,c214024_g1,c215597_g5,c216034_g4,c216809_g1,c217861_g4,c217861_g6,c218321_g1,c219591_g3,c220213_g3,c220503_g1,c221095_g1,c221222_g1,c222203_g1,c222353_g6,c223158_g2,c223158_g3,c224960_g1,c225082_g1,c225186_g1,c22…	MF	0.00013	0.000742857	50	1899	5
GO:0043168	anion binding	c144091_g1,c169660_g1,c171256_g1,c174451_g1,c177784_g4,c178499_g1,c183170_g1,c183801_g1,c183951_g1,c200960_g1,c201128_g2,c201154_g1,c205244_g1,c208353_g1,c208493_g1,c208856_g1,c209306_g1,c210307_g1,c214024_g1,c215597_g5,c216034_g4,c216809_g1,c217861_g4,c217861_g6,c218321_g1,c219591_g3,c220213_g3,c220503_g1,c221095_g1,c221222_g1,c222203_g1,c222353_g6,c223158_g2,c223158_g3,c224960_g1,c225082_g1,c22…	MF	0.00015	0.000631579	51	1964	4
GO:0017076	purine nucleotide binding	c144091_g1,c169660_g1,c171256_g1,c174451_g1,c177784_g4,c178499_g1,c183170_g1,c183801_g1,c183951_g1,c201128_g2,c201154_g1,c205244_g1,c208353_g1,c208493_g1,c208856_g1,c209306_g1,c210307_g1,c214024_g1,c215597_g5,c216034_g4,c216809_g1,c217861_g4,c217861_g6,c218321_g1,c219591_g3,c220213_g3,c220503_g1,c221095_g1,c221222_g1,c222203_g1,c222353_g6,c223158_g2,c223158_g3,c224960_g1,c225082_g1,c225186_g1,c22…	MF	0.00015	0.000631579	50	1911	5
GO:0032555	purine ribonucleotide binding	c144091_g1,c169660_g1,c171256_g1,c174451_g1,c177784_g4,c178499_g1,c183170_g1,c183801_g1,c183951_g1,c201128_g2,c201154_g1,c205244_g1,c208353_g1,c208493_g1,c208856_g1,c209306_g1,c210307_g1,c214024_g1,c215597_g5,c216034_g4,c216809_g1,c217861_g4,c217861_g6,c218321_g1,c219591_g3,c220213_g3,c220503_g1,c221095_g1,c221222_g1,c222203_g1,c222353_g6,c223158_g2,c223158_g3,c224960_g1,c225082_g1,c225186_g1,c22…	MF	0.00015	0.000631579	50	1911	5
GO:0032553	ribonucleotide binding	c144091_g1,c169660_g1,c171256_g1,c174451_g1,c177784_g4,c178499_g1,c183170_g1,c183801_g1,c183951_g1,c201128_g2,c201154_g1,c205244_g1,c208353_g1,c208493_g1,c208856_g1,c209306_g1,c210307_g1,c214024_g1,c215597_g5,c216034_g4,c216809_g1,c217861_g4,c217861_g6,c218321_g1,c219591_g3,c220213_g3,c220503_g1,c221095_g1,c221222_g1,c222203_g1,c222353_g6,c223158_g2,c223158_g3,c224960_g1,c225082_g1,c225186_g1,c22…	MF	0.00015	0.000631579	50	1912	4
GO:1901363	heterocyclic compound binding	c101851_g1,c144091_g1,c169660_g1,c171256_g1,c174451_g1,c174811_g1,c177784_g4,c178499_g1,c183170_g1,c183801_g1,c183951_g1,c186568_g1,c193956_g1,c193956_g2,c199538_g1,c199742_g1,c201115_g1,c201128_g2,c201154_g1,c203513_g1,c205089_g10,c205244_g1,c206160_g1,c208353_g1,c208493_g1,c208856_g1,c209306_g1,c210307_g1,c211332_g2,c214024_g1,c215597_g5,c216034_g4,c216809_g1,c217861_g4,c217861_g6,c218321_g1,c2…	MF	0.0002	0.000666667	66	2831	3
GO:0051213	dioxygenase activity	c197215_g1,c201297_g1,c209294_g1,c221224_g6,c226586_g1,c228956_g1,c230416_g2	MF	0.00021	0.000622222	7	74	4
GO:0097159	organic cyclic compound binding	c101851_g1,c144091_g1,c169660_g1,c171256_g1,c174451_g1,c174811_g1,c177784_g4,c178499_g1,c183170_g1,c183801_g1,c183951_g1,c186568_g1,c193956_g1,c193956_g2,c199538_g1,c199742_g1,c201115_g1,c201128_g2,c201154_g1,c203513_g1,c205089_g10,c205244_g1,c206160_g1,c208353_g1,c208493_g1,c208856_g1,c209306_g1,c210307_g1,c211332_g2,c214024_g1,c215597_g5,c216034_g4,c216809_g1,c217861_g4,c217861_g6,c218321_g1,c2…	MF	0.00021	0.000622222	66	2838	3
GO:0005488	binding	c101851_g1,c144091_g1,c169660_g1,c171256_g1,c174451_g1,c174811_g1,c177784_g4,c178499_g1,c181135_g1,c183170_g1,c183801_g1,c183951_g1,c186568_g1,c193956_g1,c193956_g2,c197215_g1,c199538_g1,c199742_g1,c200960_g1,c201115_g1,c201128_g2,c201154_g1,c201228_g1,c201297_g1,c203513_g1,c205089_g10,c205244_g1,c206160_g1,c207461_g2,c208353_g1,c208493_g1,c208856_g1,c209294_g1,c209306_g1,c209679_g1,c210307_g1,c2…	MF	0.00023	0.000613333	92	4520	2
GO:0000166	nucleotide binding	c144091_g1,c169660_g1,c171256_g1,c174451_g1,c177784_g4,c178499_g1,c183170_g1,c183801_g1,c183951_g1,c201128_g2,c201154_g1,c205244_g1,c208353_g1,c208493_g1,c208856_g1,c209306_g1,c210307_g1,c214024_g1,c215597_g5,c216034_g4,c216809_g1,c217861_g4,c217861_g6,c218321_g1,c219591_g3,c220213_g3,c220503_g1,c221095_g1,c221222_g1,c222203_g1,c222353_g6,c223158_g2,c223158_g3,c224960_g1,c225082_g1,c225186_g1,c22…	MF	0.00028	0.000678788	50	1956	4
GO:1901265	nucleoside phosphate binding	c144091_g1,c169660_g1,c171256_g1,c174451_g1,c177784_g4,c178499_g1,c183170_g1,c183801_g1,c183951_g1,c201128_g2,c201154_g1,c205244_g1,c208353_g1,c208493_g1,c208856_g1,c209306_g1,c210307_g1,c214024_g1,c215597_g5,c216034_g4,c216809_g1,c217861_g4,c217861_g6,c218321_g1,c219591_g3,c220213_g3,c220503_g1,c221095_g1,c221222_g1,c222203_g1,c222353_g6,c223158_g2,c223158_g3,c224960_g1,c225082_g1,c225186_g1,c22…	MF	0.00028	0.000678788	50	1956	4
GO:0004674	protein serine/threonine kinase activity	c169660_g1,c171256_g1,c178499_g1,c183801_g1,c205244_g1,c208856_g1,c209306_g1,c210307_g1,c215597_g5,c220503_g1,c221095_g1,c222203_g1,c226320_g1,c227294_g1,c228400_g1,c228439_g3,c230056_g2,c230504_g2,c230703_g2,c230720_g1,c231786_g1,c249905_g1	MF	0.00031	0.000688889	22	603	5
GO:0043167	ion binding	c144091_g1,c169660_g1,c171256_g1,c174451_g1,c177784_g4,c178499_g1,c183170_g1,c183801_g1,c183951_g1,c193956_g1,c193956_g2,c197215_g1,c200960_g1,c201128_g2,c201154_g1,c201228_g1,c201297_g1,c205244_g1,c207461_g2,c208353_g1,c208493_g1,c208856_g1,c209294_g1,c209306_g1,c210307_g1,c211663_g2,c211938_g1,c214024_g1,c215086_g7,c215597_g5,c216034_g4,c216099_g1,c216791_g1,c216809_g1,c217861_g4,c217861_g6,c21…	MF	0.00032	0.000673684	74	3356	3
GO:0004672	protein kinase activity	c169660_g1,c171256_g1,c178499_g1,c183801_g1,c205244_g1,c208856_g1,c209306_g1,c210307_g1,c215597_g5,c220503_g1,c221095_g1,c222203_g1,c226320_g1,c227294_g1,c228400_g1,c228439_g3,c230056_g2,c230504_g2,c230703_g2,c230720_g1,c231786_g1,c249905_g1	MF	0.00052	0.00104	22	626	4
GO:0016773	phosphotransferase activity, alcohol group as acceptor	c169660_g1,c171256_g1,c178499_g1,c183801_g1,c205244_g1,c208856_g1,c209306_g1,c210307_g1,c215597_g5,c220503_g1,c221095_g1,c222203_g1,c226320_g1,c227294_g1,c228400_g1,c228439_g3,c230056_g2,c230504_g2,c230703_g2,c230720_g1,c231786_g1,c249905_g1,c285304_g1	MF	0.00184	0.00350476	23	734	5
GO:0030246	carbohydrate binding	c178499_g1,c205244_g1,c222203_g1,c223391_g3,c227294_g1,c231786_g1	MF	0.0023	0.00418182	6	82	3
GO:0004652	polynucleotide adenylyltransferase activity	c223158_g2,c223158_g3	MF	0.00264	0.0045913	2	5	7
GO:0016301	kinase activity	c169660_g1,c171256_g1,c178499_g1,c183801_g1,c205244_g1,c208856_g1,c209306_g1,c210307_g1,c215597_g5,c220503_g1,c221095_g1,c222203_g1,c224960_g1,c226320_g1,c227294_g1,c228400_g1,c228439_g3,c230056_g2,c230504_g2,c230703_g2,c230720_g1,c231786_g1,c249905_g1,c285304_g1	MF	0.00371	0.00618333	24	822	5
GO:0016772	transferase activity, transferring phosphorus-containing groups	c169660_g1,c171256_g1,c178499_g1,c183801_g1,c205244_g1,c208856_g1,c209306_g1,c210307_g1,c215597_g5,c220503_g1,c221095_g1,c222203_g1,c223158_g2,c223158_g3,c224960_g1,c226320_g1,c227294_g1,c228400_g1,c228439_g3,c230056_g2,c230504_g2,c230703_g2,c230720_g1,c231786_g1,c249905_g1,c285304_g1	MF	0.00878	0.014048	26	979	4
GO:0004601	peroxidase activity	c211663_g2,c215086_g7,c225503_g1,c230956_g1	MF	0.01056	0.0162462	4	52	3
GO:0004568	chitinase activity	c199907_g1,c209679_g1	MF	0.01126	0.0166815	2	10	6
GO:0016684	oxidoreductase activity, acting on peroxide as acceptor	c211663_g2,c215086_g7,c225503_g1,c230956_g1	MF	0.01281	0.0183	4	55	4
GO:0016209	antioxidant activity	c211663_g2,c215086_g7,c225503_g1,c230956_g1	MF	0.02358	0.0325241	4	66	2
GO:0070566	adenylyltransferase activity	c223158_g2,c223158_g3	MF	0.03157	0.0420933	2	17	6
GO:0031625	ubiquitin protein ligase binding	c218321_g1,c222203_g1	MF	0.04271	0.0542349	2	20	6
GO:0044389	ubiquitin-like protein ligase binding	c218321_g1,c222203_g1	MF	0.04271	0.0542349	2	20	5
GO:0003973	(S)-2-hydroxy-acid oxidase activity	c210974_g1	MF	0.04898	0.0544222	1	3	6
GO:0016847	1-aminocyclopropane-1-carboxylate synthase activity	c223137_g5	MF	0.04898	0.0544222	1	3	5
GO:0035671	enone reductase activity	c216904_g1	MF	0.04898	0.0544222	1	3	6
GO:0045543	gibberellin 2-beta-dioxygenase activity	c201297_g1	MF	0.04898	0.0544222	1	3	6
GO:0052852	very-long-chain-(S)-2-hydroxy-acid oxidase activity	c210974_g1	MF	0.04898	0.0544222	1	3	7
GO:0052853	long-chain-(S)-2-hydroxy-long-chain-acid oxidase activity	c210974_g1	MF	0.04898	0.0544222	1	3	7
GO:0052854	medium-chain-(S)-2-hydroxy-acid oxidase activity	c210974_g1	MF	0.04898	0.0544222	1	3	7
GO:0016491	oxidoreductase activity	c197215_g1,c201297_g1,c206036_g1,c207461_g2,c209294_g1,c210974_g1,c210991_g1,c211663_g2,c213266_g1,c215086_g7,c216904_g1,c217911_g1,c220324_g1,c221224_g6,c225503_g1,c226586_g1,c228956_g1,c230416_g2,c230956_g1	MF	0.04936	0.04936	19	771	3
GO:0005681	spliceosomal complex	c174811_g1,c199538_g1,c201115_g1,c211332_g2,c224992_g1	CC	0.0031	0.0093	5	68	5
GO:0016607	nuclear speck	c201115_g1,c211332_g2,c224992_g1	CC	0.0368	0.0552	3	50	7
GO:0016363	nuclear matrix	c225173_g1	CC	0.0435	0.0435	1	3	5

## Sheet: DS1_Up
GO_accession	Description	GeneNames	Ontology	pValue	qValue	fg	bg	GO_level
GO:0044281	small molecule metabolic process	c102055_g1,c102274_g1,c108834_g2,c110032_g1,c110032_g2,c130388_g1,c130963_g1,c131317_g1,c131861_g1,c137195_g1,c137211_g1,c137472_g1,c137532_g1,c137532_g2,c139238_g1,c140023_g1,c144184_g1,c144434_g1,c146942_g1,c148213_g1,c148262_g1,c148313_g1,c148834_g1,c149524_g1,c150469_g1,c151047_g1,c151047_g2,c151047_g4,c153099_g1,c153259_g1,c154301_g2,c154738_g1,c156181_g1,c158031_g1,c158643_g1,c159481_g1,c16…	BP	3.2e-13	6.816e-11	259	760	3
GO:0055086	nucleobase-containing small molecule metabolic process	c110032_g1,c110032_g2,c131861_g1,c137211_g1,c139238_g1,c140023_g1,c146942_g1,c148213_g1,c151047_g1,c151047_g2,c151047_g4,c153259_g1,c154301_g2,c158643_g1,c160544_g1,c161865_g1,c162291_g1,c169523_g1,c173745_g1,c180412_g1,c181634_g1,c185622_g1,c186154_g1,c190136_g1,c190136_g2,c190282_g2,c190639_g1,c197040_g1,c197145_g1,c197168_g1,c197267_g1,c197597_g1,c198040_g1,c198069_g1,c198119_g3,c198703_g1,c19…	BP	9.8e-12	1.0437e-09	90	202	4
GO:0006753	nucleoside phosphate metabolic process	c110032_g1,c110032_g2,c137211_g1,c139238_g1,c140023_g1,c146942_g1,c148213_g1,c151047_g1,c151047_g2,c151047_g4,c153259_g1,c154301_g2,c158643_g1,c160544_g1,c161865_g1,c162291_g1,c169523_g1,c173745_g1,c181634_g1,c185622_g1,c186154_g1,c190282_g2,c190639_g1,c197040_g1,c197145_g1,c197168_g1,c197267_g1,c197597_g1,c198040_g1,c198069_g1,c198119_g3,c198703_g1,c198928_g1,c199516_g1,c199759_g1,c199794_g1,c20…	BP	5.9e-11	3.59057e-09	74	159	5
GO:0009117	nucleotide metabolic process	c110032_g1,c110032_g2,c137211_g1,c139238_g1,c140023_g1,c146942_g1,c148213_g1,c151047_g1,c151047_g2,c151047_g4,c153259_g1,c154301_g2,c158643_g1,c160544_g1,c161865_g1,c162291_g1,c169523_g1,c173745_g1,c181634_g1,c185622_g1,c186154_g1,c190282_g2,c190639_g1,c197040_g1,c197145_g1,c197168_g1,c197267_g1,c197597_g1,c198040_g1,c198069_g1,c198119_g3,c198703_g1,c198928_g1,c199516_g1,c199759_g1,c199794_g1,c20…	BP	5.9e-11	3.59057e-09	74	159	6
GO:0019693	ribose phosphate metabolic process	c110032_g1,c110032_g2,c137211_g1,c139238_g1,c140023_g1,c146942_g1,c148213_g1,c151047_g1,c151047_g2,c151047_g4,c153259_g1,c154301_g2,c158643_g1,c160544_g1,c161865_g1,c162291_g1,c169523_g1,c173745_g1,c181634_g1,c185622_g1,c197145_g1,c197168_g1,c197597_g1,c198040_g1,c198069_g1,c198119_g3,c198703_g1,c198928_g1,c199516_g1,c199759_g1,c199794_g1,c201148_g1,c204298_g1,c204369_g2,c206088_g1,c208395_g1,c20…	BP	8.7e-11	3.7062e-09	63	128	5
GO:0034404	nucleobase-containing small molecule biosynthetic process	c110032_g1,c110032_g2,c137211_g1,c139238_g1,c140023_g1,c151047_g1,c151047_g2,c151047_g4,c153259_g1,c154301_g2,c158643_g1,c161865_g1,c162291_g1,c173745_g1,c181634_g1,c190136_g2,c197145_g1,c197168_g1,c197597_g1,c198119_g3,c199516_g1,c199759_g1,c199794_g1,c201148_g1,c204369_g2,c206088_g1,c208395_g1,c209207_g1,c210609_g1,c211144_g1,c211285_g1,c212216_g1,c212216_g2,c21544_g1,c217065_g1,c220308_g1,c221…	BP	1.2e-10	4.26e-09	46	82	5
GO:0006732	coenzyme metabolic process	c110032_g1,c110032_g2,c137195_g1,c137211_g1,c137472_g1,c139238_g1,c140023_g1,c144434_g1,c148213_g1,c151047_g1,c151047_g2,c151047_g4,c154301_g2,c158643_g1,c159481_g1,c161865_g1,c162045_g1,c162045_g2,c169198_g1,c170920_g1,c176328_g1,c177014_g1,c181634_g1,c186154_g1,c190639_g1,c197168_g1,c198703_g1,c198928_g1,c199516_g1,c199759_g1,c199794_g1,c201148_g1,c203633_g1,c204369_g2,c204415_g1,c204873_g1,c20…	BP	1.7e-10	5.17286e-09	79	177	5
GO:0006733	oxidoreduction coenzyme metabolic process	c110032_g1,c110032_g2,c137211_g1,c139238_g1,c140023_g1,c148213_g1,c151047_g1,c151047_g2,c151047_g4,c154301_g2,c158643_g1,c161865_g1,c169198_g1,c181634_g1,c190639_g1,c197168_g1,c198928_g1,c199516_g1,c199759_g1,c199794_g1,c201148_g1,c204369_g2,c205602_g2,c206088_g1,c209207_g1,c209751_g2,c210204_g1,c210398_g1,c210609_g1,c211144_g1,c211285_g1,c212216_g1,c212216_g2,c213917_g5,c21544_g1,c220308_g1,c221…	BP	2e-10	5.325e-09	49	91	6
GO:0072522	purine-containing compound biosynthetic process	c110032_g1,c110032_g2,c137211_g1,c139238_g1,c140023_g1,c146942_g1,c151047_g1,c151047_g2,c151047_g4,c154301_g2,c158643_g1,c160544_g1,c161865_g1,c162291_g1,c169523_g1,c173745_g1,c181634_g1,c185622_g1,c190136_g2,c197168_g1,c197597_g1,c198040_g1,c198069_g1,c199516_g1,c199759_g1,c199794_g1,c201148_g1,c204298_g1,c204369_g2,c206088_g1,c208395_g1,c208759_g1,c209207_g1,c210130_g2,c210609_g1,c211144_g1,c21…	BP	2.2e-10	5.20667e-09	53	102	6
GO:0009156	ribonucleoside monophosphate biosynthetic process	c110032_g1,c110032_g2,c137211_g1,c139238_g1,c140023_g1,c146942_g1,c151047_g1,c151047_g2,c151047_g4,c153259_g1,c154301_g2,c158643_g1,c160544_g1,c161865_g1,c162291_g1,c169523_g1,c173745_g1,c181634_g1,c185622_g1,c197145_g1,c197168_g1,c197597_g1,c198040_g1,c198069_g1,c198119_g3,c198703_g1,c199516_g1,c199759_g1,c199794_g1,c201148_g1,c204298_g1,c204369_g2,c206088_g1,c208395_g1,c209207_g1,c210130_g2,c21…	BP	2.7e-10	5.47714e-09	55	108	8
GO:0009161	ribonucleoside monophosphate metabolic process	c110032_g1,c110032_g2,c137211_g1,c139238_g1,c140023_g1,c146942_g1,c151047_g1,c151047_g2,c151047_g4,c153259_g1,c154301_g2,c158643_g1,c160544_g1,c161865_g1,c162291_g1,c169523_g1,c173745_g1,c181634_g1,c185622_g1,c197145_g1,c197168_g1,c197597_g1,c198040_g1,c198069_g1,c198119_g3,c198703_g1,c199516_g1,c199759_g1,c199794_g1,c201148_g1,c204298_g1,c204369_g2,c206088_g1,c208395_g1,c209207_g1,c210130_g2,c21…	BP	2.7e-10	5.47714e-09	55	108	7
GO:0009126	purine nucleoside monophosphate metabolic process	c110032_g1,c110032_g2,c137211_g1,c139238_g1,c140023_g1,c146942_g1,c151047_g1,c151047_g2,c151047_g4,c154301_g2,c158643_g1,c160544_g1,c161865_g1,c162291_g1,c169523_g1,c173745_g1,c181634_g1,c185622_g1,c197168_g1,c197597_g1,c198040_g1,c198069_g1,c199516_g1,c199759_g1,c199794_g1,c201148_g1,c204298_g1,c204369_g2,c206088_g1,c208395_g1,c209207_g1,c210130_g2,c210609_g1,c211144_g1,c211285_g1,c212216_g1,c21…	BP	3.4e-10	5.36444e-09	49	92	7
GO:0009127	purine nucleoside monophosphate biosynthetic process	c110032_g1,c110032_g2,c137211_g1,c139238_g1,c140023_g1,c146942_g1,c151047_g1,c151047_g2,c151047_g4,c154301_g2,c158643_g1,c160544_g1,c161865_g1,c162291_g1,c169523_g1,c173745_g1,c181634_g1,c185622_g1,c197168_g1,c197597_g1,c198040_g1,c198069_g1,c199516_g1,c199759_g1,c199794_g1,c201148_g1,c204298_g1,c204369_g2,c206088_g1,c208395_g1,c209207_g1,c210130_g2,c210609_g1,c211144_g1,c211285_g1,c212216_g1,c21…	BP	3.4e-10	5.36444e-09	49	92	8
GO:0009167	purine ribonucleoside monophosphate metabolic process	c110032_g1,c110032_g2,c137211_g1,c139238_g1,c140023_g1,c146942_g1,c151047_g1,c151047_g2,c151047_g4,c154301_g2,c158643_g1,c160544_g1,c161865_g1,c162291_g1,c169523_g1,c173745_g1,c181634_g1,c185622_g1,c197168_g1,c197597_g1,c198040_g1,c198069_g1,c199516_g1,c199759_g1,c199794_g1,c201148_g1,c204298_g1,c204369_g2,c206088_g1,c208395_g1,c209207_g1,c210130_g2,c210609_g1,c211144_g1,c211285_g1,c212216_g1,c21…	BP	3.4e-10	5.36444e-09	49	92	8
GO:0009168	purine ribonucleoside monophosphate biosynthetic process	c110032_g1,c110032_g2,c137211_g1,c139238_g1,c140023_g1,c146942_g1,c151047_g1,c151047_g2,c151047_g4,c154301_g2,c158643_g1,c160544_g1,c161865_g1,c162291_g1,c169523_g1,c173745_g1,c181634_g1,c185622_g1,c197168_g1,c197597_g1,c198040_g1,c198069_g1,c199516_g1,c199759_g1,c199794_g1,c201148_g1,c204298_g1,c204369_g2,c206088_g1,c208395_g1,c209207_g1,c210130_g2,c210609_g1,c211144_g1,c211285_g1,c212216_g1,c21…	BP	3.4e-10	5.36444e-09	49	92	9
GO:0009123	nucleoside monophosphate metabolic process	c110032_g1,c110032_g2,c137211_g1,c139238_g1,c140023_g1,c146942_g1,c151047_g1,c151047_g2,c151047_g4,c153259_g1,c154301_g2,c158643_g1,c160544_g1,c161865_g1,c162291_g1,c169523_g1,c173745_g1,c181634_g1,c185622_g1,c197145_g1,c197168_g1,c197597_g1,c198040_g1,c198069_g1,c198119_g3,c198703_g1,c199516_g1,c199759_g1,c199794_g1,c201148_g1,c204298_g1,c204369_g2,c206088_g1,c208395_g1,c209207_g1,c210130_g2,c21…	BP	6.5e-10	8.39091e-09	55	110	6
GO:0009124	nucleoside monophosphate biosynthetic process	c110032_g1,c110032_g2,c137211_g1,c139238_g1,c140023_g1,c146942_g1,c151047_g1,c151047_g2,c151047_g4,c153259_g1,c154301_g2,c158643_g1,c160544_g1,c161865_g1,c162291_g1,c169523_g1,c173745_g1,c181634_g1,c185622_g1,c197145_g1,c197168_g1,c197597_g1,c198040_g1,c198069_g1,c198119_g3,c198703_g1,c199516_g1,c199759_g1,c199794_g1,c201148_g1,c204298_g1,c204369_g2,c206088_g1,c208395_g1,c209207_g1,c210130_g2,c21…	BP	6.5e-10	8.39091e-09	55	110	7
GO:0009259	ribonucleotide metabolic process	c110032_g1,c110032_g2,c137211_g1,c139238_g1,c140023_g1,c146942_g1,c151047_g1,c151047_g2,c151047_g4,c153259_g1,c154301_g2,c158643_g1,c160544_g1,c161865_g1,c162291_g1,c169523_g1,c173745_g1,c181634_g1,c185622_g1,c197145_g1,c197168_g1,c197597_g1,c198040_g1,c198069_g1,c198119_g3,c198703_g1,c199516_g1,c199759_g1,c199794_g1,c201148_g1,c204298_g1,c204369_g2,c206088_g1,c208395_g1,c208759_g1,c209207_g1,c21…	BP	1.1e-09	1.23316e-08	56	114	6
GO:0009260	ribonucleotide biosynthetic process	c110032_g1,c110032_g2,c137211_g1,c139238_g1,c140023_g1,c146942_g1,c151047_g1,c151047_g2,c151047_g4,c153259_g1,c154301_g2,c158643_g1,c160544_g1,c161865_g1,c162291_g1,c169523_g1,c173745_g1,c181634_g1,c185622_g1,c197145_g1,c197168_g1,c197597_g1,c198040_g1,c198069_g1,c198119_g3,c198703_g1,c199516_g1,c199759_g1,c199794_g1,c201148_g1,c204298_g1,c204369_g2,c206088_g1,c208395_g1,c208759_g1,c209207_g1,c21…	BP	1.1e-09	1.23316e-08	56	114	7
GO:0046390	ribose phosphate biosynthetic process	c110032_g1,c110032_g2,c137211_g1,c139238_g1,c140023_g1,c146942_g1,c151047_g1,c151047_g2,c151047_g4,c153259_g1,c154301_g2,c158643_g1,c160544_g1,c161865_g1,c162291_g1,c169523_g1,c173745_g1,c181634_g1,c185622_g1,c197145_g1,c197168_g1,c197597_g1,c198040_g1,c198069_g1,c198119_g3,c198703_g1,c199516_g1,c199759_g1,c199794_g1,c201148_g1,c204298_g1,c204369_g2,c206088_g1,c208395_g1,c208759_g1,c209207_g1,c21…	BP	1.1e-09	1.23316e-08	56	114	6
GO:0006163	purine nucleotide metabolic process	c110032_g1,c110032_g2,c137211_g1,c139238_g1,c140023_g1,c146942_g1,c151047_g1,c151047_g2,c151047_g4,c154301_g2,c158643_g1,c160544_g1,c161865_g1,c162291_g1,c169523_g1,c173745_g1,c181634_g1,c185622_g1,c197168_g1,c197597_g1,c198040_g1,c198069_g1,c199516_g1,c199759_g1,c199794_g1,c201148_g1,c204298_g1,c204369_g2,c206088_g1,c208395_g1,c208759_g1,c209207_g1,c210130_g2,c210609_g1,c211144_g1,c211285_g1,c21…	BP	1.6e-09	1.51467e-08	50	98	6
GO:0006164	purine nucleotide biosynthetic process	c110032_g1,c110032_g2,c137211_g1,c139238_g1,c140023_g1,c146942_g1,c151047_g1,c151047_g2,c151047_g4,c154301_g2,c158643_g1,c160544_g1,c161865_g1,c162291_g1,c169523_g1,c173745_g1,c181634_g1,c185622_g1,c197168_g1,c197597_g1,c198040_g1,c198069_g1,c199516_g1,c199759_g1,c199794_g1,c201148_g1,c204298_g1,c204369_g2,c206088_g1,c208395_g1,c208759_g1,c209207_g1,c210130_g2,c210609_g1,c211144_g1,c211285_g1,c21…	BP	1.6e-09	1.51467e-08	50	98	7
GO:0009150	purine ribonucleotide metabolic process	c110032_g1,c110032_g2,c137211_g1,c139238_g1,c140023_g1,c146942_g1,c151047_g1,c151047_g2,c151047_g4,c154301_g2,c158643_g1,c160544_g1,c161865_g1,c162291_g1,c169523_g1,c173745_g1,c181634_g1,c185622_g1,c197168_g1,c197597_g1,c198040_g1,c198069_g1,c199516_g1,c199759_g1,c199794_g1,c201148_g1,c204298_g1,c204369_g2,c206088_g1,c208395_g1,c208759_g1,c209207_g1,c210130_g2,c210609_g1,c211144_g1,c211285_g1,c21…	BP	1.6e-09	1.51467e-08	50	98	7
GO:0009152	purine ribonucleotide biosynthetic process	c110032_g1,c110032_g2,c137211_g1,c139238_g1,c140023_g1,c146942_g1,c151047_g1,c151047_g2,c151047_g4,c154301_g2,c158643_g1,c160544_g1,c161865_g1,c162291_g1,c169523_g1,c173745_g1,c181634_g1,c185622_g1,c197168_g1,c197597_g1,c198040_g1,c198069_g1,c199516_g1,c199759_g1,c199794_g1,c201148_g1,c204298_g1,c204369_g2,c206088_g1,c208395_g1,c208759_g1,c209207_g1,c210130_g2,c210609_g1,c211144_g1,c211285_g1,c21…	BP	1.6e-09	1.51467e-08	50	98	8
GO:0009199	ribonucleoside triphosphate metabolic process	c110032_g1,c110032_g2,c137211_g1,c139238_g1,c140023_g1,c146942_g1,c151047_g1,c151047_g2,c151047_g4,c154301_g2,c158643_g1,c160544_g1,c161865_g1,c169523_g1,c181634_g1,c185622_g1,c197168_g1,c198040_g1,c198119_g3,c199516_g1,c199759_g1,c199794_g1,c201148_g1,c204298_g1,c204369_g2,c206088_g1,c209207_g1,c210609_g1,c211144_g1,c211285_g1,c212216_g1,c212216_g2,c21544_g1,c220308_g1,c221451_g4,c225822_g3,c226…	BP	2.4e-09	2.00471e-08	42	77	7
GO:0009201	ribonucleoside triphosphate biosynthetic process	c110032_g1,c110032_g2,c137211_g1,c139238_g1,c140023_g1,c146942_g1,c151047_g1,c151047_g2,c151047_g4,c154301_g2,c158643_g1,c160544_g1,c161865_g1,c169523_g1,c181634_g1,c185622_g1,c197168_g1,c198040_g1,c198119_g3,c199516_g1,c199759_g1,c199794_g1,c201148_g1,c204298_g1,c204369_g2,c206088_g1,c209207_g1,c210609_g1,c211144_g1,c211285_g1,c212216_g1,c212216_g2,c21544_g1,c220308_g1,c221451_g4,c225822_g3,c226…	BP	2.4e-09	2.00471e-08	42	77	8
GO:0009165	nucleotide biosynthetic process	c110032_g1,c110032_g2,c137211_g1,c139238_g1,c140023_g1,c146942_g1,c151047_g1,c151047_g2,c151047_g4,c153259_g1,c154301_g2,c158643_g1,c160544_g1,c161865_g1,c162291_g1,c169523_g1,c173745_g1,c181634_g1,c185622_g1,c186154_g1,c190639_g1,c197040_g1,c197145_g1,c197168_g1,c197597_g1,c198040_g1,c198069_g1,c198119_g3,c198703_g1,c199516_g1,c199759_g1,c199794_g1,c201148_g1,c204298_g1,c204369_g2,c204415_g1,c20…	BP	2.9e-09	2.24618e-08	63	137	7
GO:1901293	nucleoside phosphate biosynthetic process	c110032_g1,c110032_g2,c137211_g1,c139238_g1,c140023_g1,c146942_g1,c151047_g1,c151047_g2,c151047_g4,c153259_g1,c154301_g2,c158643_g1,c160544_g1,c161865_g1,c162291_g1,c169523_g1,c173745_g1,c181634_g1,c185622_g1,c186154_g1,c190639_g1,c197040_g1,c197145_g1,c197168_g1,c197597_g1,c198040_g1,c198069_g1,c198119_g3,c198703_g1,c199516_g1,c199759_g1,c199794_g1,c201148_g1,c204298_g1,c204369_g2,c204415_g1,c20…	BP	2.9e-09	2.24618e-08	63	137	6
GO:0009141	nucleoside triphosphate metabolic process	c110032_g1,c110032_g2,c137211_g1,c139238_g1,c140023_g1,c146942_g1,c151047_g1,c151047_g2,c151047_g4,c154301_g2,c158643_g1,c160544_g1,c161865_g1,c169523_g1,c181634_g1,c185622_g1,c197168_g1,c198040_g1,c198119_g3,c199516_g1,c199759_g1,c199794_g1,c201148_g1,c204298_g1,c204369_g2,c206088_g1,c209207_g1,c210609_g1,c211144_g1,c211285_g1,c212216_g1,c212216_g2,c21544_g1,c220308_g1,c221451_g4,c225822_g3,c226…	BP	4.1e-09	2.96034e-08	42	78	6
GO:0009142	nucleoside triphosphate biosynthetic process	c110032_g1,c110032_g2,c137211_g1,c139238_g1,c140023_g1,c146942_g1,c151047_g1,c151047_g2,c151047_g4,c154301_g2,c158643_g1,c160544_g1,c161865_g1,c169523_g1,c181634_g1,c185622_g1,c197168_g1,c198040_g1,c198119_g3,c199516_g1,c199759_g1,c199794_g1,c201148_g1,c204298_g1,c204369_g2,c206088_g1,c209207_g1,c210609_g1,c211144_g1,c211285_g1,c212216_g1,c212216_g2,c21544_g1,c220308_g1,c221451_g4,c225822_g3,c226…	BP	4.1e-09	2.96034e-08	42	78	7
GO:0072521	purine-containing compound metabolic process	c110032_g1,c110032_g2,c137211_g1,c139238_g1,c140023_g1,c146942_g1,c151047_g1,c151047_g2,c151047_g4,c154301_g2,c158643_g1,c160544_g1,c161865_g1,c162291_g1,c169523_g1,c173745_g1,c181634_g1,c185622_g1,c190136_g2,c197168_g1,c197597_g1,c198040_g1,c198069_g1,c199516_g1,c199759_g1,c199794_g1,c201148_g1,c204298_g1,c204369_g2,c206088_g1,c208395_g1,c208759_g1,c209207_g1,c210130_g2,c210609_g1,c211144_g1,c21…	BP	4.8e-09	3.29806e-08	53	109	5
GO:0006754	ATP biosynthetic process	c110032_g1,c110032_g2,c137211_g1,c139238_g1,c140023_g1,c146942_g1,c151047_g1,c151047_g2,c151047_g4,c154301_g2,c158643_g1,c160544_g1,c161865_g1,c169523_g1,c181634_g1,c185622_g1,c197168_g1,c198040_g1,c199516_g1,c199759_g1,c199794_g1,c201148_g1,c204298_g1,c204369_g2,c206088_g1,c209207_g1,c210609_g1,c211144_g1,c211285_g1,c212216_g1,c212216_g2,c21544_g1,c220308_g1,c221451_g4,c226869_g1,c228355_g2,c230…	BP	4.9e-09	3.02522e-08	40	73	6
GO:0009144	purine nucleoside triphosphate metabolic process	c110032_g1,c110032_g2,c137211_g1,c139238_g1,c140023_g1,c146942_g1,c151047_g1,c151047_g2,c151047_g4,c154301_g2,c158643_g1,c160544_g1,c161865_g1,c169523_g1,c181634_g1,c185622_g1,c197168_g1,c198040_g1,c199516_g1,c199759_g1,c199794_g1,c201148_g1,c204298_g1,c204369_g2,c206088_g1,c209207_g1,c210609_g1,c211144_g1,c211285_g1,c212216_g1,c212216_g2,c21544_g1,c220308_g1,c221451_g4,c226869_g1,c228355_g2,c230…	BP	4.9e-09	3.02522e-08	40	73	7
GO:0009145	purine nucleoside triphosphate biosynthetic process	c110032_g1,c110032_g2,c137211_g1,c139238_g1,c140023_g1,c146942_g1,c151047_g1,c151047_g2,c151047_g4,c154301_g2,c158643_g1,c160544_g1,c161865_g1,c169523_g1,c181634_g1,c185622_g1,c197168_g1,c198040_g1,c199516_g1,c199759_g1,c199794_g1,c201148_g1,c204298_g1,c204369_g2,c206088_g1,c209207_g1,c210609_g1,c211144_g1,c211285_g1,c212216_g1,c212216_g2,c21544_g1,c220308_g1,c221451_g4,c226869_g1,c228355_g2,c230…	BP	4.9e-09	3.02522e-08	40	73	8
GO:0009205	purine ribonucleoside triphosphate metabolic process	c110032_g1,c110032_g2,c137211_g1,c139238_g1,c140023_g1,c146942_g1,c151047_g1,c151047_g2,c151047_g4,c154301_g2,c158643_g1,c160544_g1,c161865_g1,c169523_g1,c181634_g1,c185622_g1,c197168_g1,c198040_g1,c199516_g1,c199759_g1,c199794_g1,c201148_g1,c204298_g1,c204369_g2,c206088_g1,c209207_g1,c210609_g1,c211144_g1,c211285_g1,c212216_g1,c212216_g2,c21544_g1,c220308_g1,c221451_g4,c226869_g1,c228355_g2,c230…	BP	4.9e-09	3.02522e-08	40	73	8
GO:0009206	purine ribonucleoside triphosphate biosynthetic process	c110032_g1,c110032_g2,c137211_g1,c139238_g1,c140023_g1,c146942_g1,c151047_g1,c151047_g2,c151047_g4,c154301_g2,c158643_g1,c160544_g1,c161865_g1,c169523_g1,c181634_g1,c185622_g1,c197168_g1,c198040_g1,c199516_g1,c199759_g1,c199794_g1,c201148_g1,c204298_g1,c204369_g2,c206088_g1,c209207_g1,c210609_g1,c211144_g1,c211285_g1,c212216_g1,c212216_g2,c21544_g1,c220308_g1,c221451_g4,c226869_g1,c228355_g2,c230…	BP	4.9e-09	3.02522e-08	40	73	9
GO:0046034	ATP metabolic process	c110032_g1,c110032_g2,c137211_g1,c139238_g1,c140023_g1,c146942_g1,c151047_g1,c151047_g2,c151047_g4,c154301_g2,c158643_g1,c160544_g1,c161865_g1,c169523_g1,c181634_g1,c185622_g1,c197168_g1,c198040_g1,c199516_g1,c199759_g1,c199794_g1,c201148_g1,c204298_g1,c204369_g2,c206088_g1,c209207_g1,c210609_g1,c211144_g1,c211285_g1,c212216_g1,c212216_g2,c21544_g1,c220308_g1,c221451_g4,c226869_g1,c228355_g2,c230…	BP	4.9e-09	3.02522e-08	40	73	5
GO:0019362	pyridine nucleotide metabolic process	c110032_g1,c110032_g2,c137211_g1,c139238_g1,c140023_g1,c148213_g1,c151047_g1,c151047_g2,c151047_g4,c154301_g2,c158643_g1,c161865_g1,c181634_g1,c190639_g1,c197168_g1,c198928_g1,c199516_g1,c199759_g1,c199794_g1,c201148_g1,c204369_g2,c205602_g2,c206088_g1,c209207_g1,c209751_g2,c210398_g1,c210609_g1,c211144_g1,c211285_g1,c212216_g1,c212216_g2,c21544_g1,c220308_g1,c221451_g4,c226869_g1,c228355_g2,c230…	BP	5.4e-09	3.02684e-08	44	84	6
GO:0046496	nicotinamide nucleotide metabolic process	c110032_g1,c110032_g2,c137211_g1,c139238_g1,c140023_g1,c148213_g1,c151047_g1,c151047_g2,c151047_g4,c154301_g2,c158643_g1,c161865_g1,c181634_g1,c197168_g1,c198928_g1,c199516_g1,c199759_g1,c199794_g1,c201148_g1,c204369_g2,c205602_g2,c206088_g1,c209207_g1,c209751_g2,c210398_g1,c210609_g1,c211144_g1,c211285_g1,c212216_g1,c212216_g2,c21544_g1,c220308_g1,c221451_g4,c226869_g1,c228355_g2,c230462_g1,c230…	BP	7.7e-09	4.20538e-08	43	82	7
GO:1901137	carbohydrate derivative biosynthetic process	c108853_g1,c110032_g1,c110032_g2,c130202_g1,c131861_g1,c137211_g1,c139238_g1,c140023_g1,c146942_g1,c151047_g1,c151047_g2,c151047_g4,c153259_g1,c154301_g2,c158643_g1,c160544_g1,c161865_g1,c162291_g1,c169523_g1,c172511_g1,c173745_g1,c175926_g1,c180412_g1,c181634_g1,c182177_g1,c185357_g1,c185622_g1,c190136_g1,c190136_g2,c197145_g1,c197168_g1,c197597_g1,c197661_g1,c198040_g1,c198069_g1,c198119_g3,c19…	BP	1.5e-08	7.9875e-08	90	227	5
GO:0006165	nucleoside diphosphate phosphorylation	c110032_g1,c110032_g2,c137211_g1,c139238_g1,c140023_g1,c151047_g1,c151047_g2,c151047_g4,c154301_g2,c158643_g1,c161865_g1,c181634_g1,c197168_g1,c199516_g1,c199759_g1,c199794_g1,c201148_g1,c204369_g2,c206088_g1,c209207_g1,c210609_g1,c211144_g1,c211285_g1,c212216_g1,c212216_g2,c21544_g1,c220308_g1,c221451_g4,c226869_g1,c228355_g2,c230462_g1,c231134_g6,c320611_g1,c35949_g1	BP	2.2e-08	1.00774e-07	34	60	7
GO:0006757	ATP generation from ADP	c110032_g1,c110032_g2,c137211_g1,c139238_g1,c140023_g1,c151047_g1,c151047_g2,c151047_g4,c154301_g2,c158643_g1,c161865_g1,c181634_g1,c197168_g1,c199516_g1,c199759_g1,c199794_g1,c201148_g1,c204369_g2,c206088_g1,c209207_g1,c210609_g1,c211144_g1,c211285_g1,c212216_g1,c212216_g2,c21544_g1,c220308_g1,c221451_g4,c226869_g1,c228355_g2,c230462_g1,c231134_g6,c320611_g1,c35949_g1	BP	2.2e-08	1.00774e-07	34	60	5
GO:0009132	nucleoside diphosphate metabolic process	c110032_g1,c110032_g2,c137211_g1,c139238_g1,c140023_g1,c151047_g1,c151047_g2,c151047_g4,c154301_g2,c158643_g1,c161865_g1,c181634_g1,c197168_g1,c199516_g1,c199759_g1,c199794_g1,c201148_g1,c204369_g2,c206088_g1,c209207_g1,c210609_g1,c211144_g1,c211285_g1,c212216_g1,c212216_g2,c21544_g1,c220308_g1,c221451_g4,c226869_g1,c228355_g2,c230462_g1,c231134_g6,c320611_g1,c35949_g1	BP	2.2e-08	1.00774e-07	34	60	6
GO:0009135	purine nucleoside diphosphate metabolic process	c110032_g1,c110032_g2,c137211_g1,c139238_g1,c140023_g1,c151047_g1,c151047_g2,c151047_g4,c154301_g2,c158643_g1,c161865_g1,c181634_g1,c197168_g1,c199516_g1,c199759_g1,c199794_g1,c201148_g1,c204369_g2,c206088_g1,c209207_g1,c210609_g1,c211144_g1,c211285_g1,c212216_g1,c212216_g2,c21544_g1,c220308_g1,c221451_g4,c226869_g1,c228355_g2,c230462_g1,c231134_g6,c320611_g1,c35949_g1	BP	2.2e-08	1.00774e-07	34	60	7
GO:0009166	nucleotide catabolic process	c110032_g1,c110032_g2,c137211_g1,c139238_g1,c140023_g1,c151047_g1,c151047_g2,c151047_g4,c154301_g2,c158643_g1,c161865_g1,c181634_g1,c197168_g1,c199516_g1,c199759_g1,c199794_g1,c201148_g1,c204369_g2,c206088_g1,c209207_g1,c210609_g1,c211144_g1,c211285_g1,c212216_g1,c212216_g2,c21544_g1,c220308_g1,c221451_g4,c226869_g1,c228355_g2,c230462_g1,c231134_g6,c320611_g1,c35949_g1	BP	2.2e-08	1.00774e-07	34	60	7
GO:0009179	purine ribonucleoside diphosphate metabolic process	c110032_g1,c110032_g2,c137211_g1,c139238_g1,c140023_g1,c151047_g1,c151047_g2,c151047_g4,c154301_g2,c158643_g1,c161865_g1,c181634_g1,c197168_g1,c199516_g1,c199759_g1,c199794_g1,c201148_g1,c204369_g2,c206088_g1,c209207_g1,c210609_g1,c211144_g1,c211285_g1,c212216_g1,c212216_g2,c21544_g1,c220308_g1,c221451_g4,c226869_g1,c228355_g2,c230462_g1,c231134_g6,c320611_g1,c35949_g1	BP	2.2e-08	1.00774e-07	34	60	8
GO:0009185	ribonucleoside diphosphate metabolic process	c110032_g1,c110032_g2,c137211_g1,c139238_g1,c140023_g1,c151047_g1,c151047_g2,c151047_g4,c154301_g2,c158643_g1,c161865_g1,c181634_g1,c197168_g1,c199516_g1,c199759_g1,c199794_g1,c201148_g1,c204369_g2,c206088_g1,c209207_g1,c210609_g1,c211144_g1,c211285_g1,c212216_g1,c212216_g2,c21544_g1,c220308_g1,c221451_g4,c226869_g1,c228355_g2,c230462_g1,c231134_g6,c320611_g1,c35949_g1	BP	2.2e-08	1.00774e-07	34	60	7
GO:0042866	pyruvate biosynthetic process	c110032_g1,c110032_g2,c137211_g1,c139238_g1,c140023_g1,c151047_g1,c151047_g2,c151047_g4,c154301_g2,c158643_g1,c161865_g1,c181634_g1,c197168_g1,c199516_g1,c199759_g1,c199794_g1,c201148_g1,c204369_g2,c206088_g1,c209207_g1,c210609_g1,c211144_g1,c211285_g1,c212216_g1,c212216_g2,c21544_g1,c220308_g1,c221451_g4,c226869_g1,c228355_g2,c230462_g1,c231134_g6,c320611_g1,c35949_g1	BP	2.2e-08	1.00774e-07	34	60	8
GO:0046031	ADP metabolic process	c110032_g1,c110032_g2,c137211_g1,c139238_g1,c140023_g1,c151047_g1,c151047_g2,c151047_g4,c154301_g2,c158643_g1,c161865_g1,c181634_g1,c197168_g1,c199516_g1,c199759_g1,c199794_g1,c201148_g1,c204369_g2,c206088_g1,c209207_g1,c210609_g1,c211144_g1,c211285_g1,c212216_g1,c212216_g2,c21544_g1,c220308_g1,c221451_g4,c226869_g1,c228355_g2,c230462_g1,c231134_g6,c320611_g1,c35949_g1	BP	2.2e-08	1.00774e-07	34	60	8
GO:0046939	nucleotide phosphorylation	c110032_g1,c110032_g2,c137211_g1,c139238_g1,c140023_g1,c151047_g1,c151047_g2,c151047_g4,c154301_g2,c158643_g1,c161865_g1,c181634_g1,c197168_g1,c199516_g1,c199759_g1,c199794_g1,c201148_g1,c204369_g2,c206088_g1,c209207_g1,c210609_g1,c211144_g1,c211285_g1,c212216_g1,c212216_g2,c21544_g1,c220308_g1,c221451_g4,c226869_g1,c228355_g2,c230462_g1,c231134_g6,c320611_g1,c35949_g1	BP	2.2e-08	1.00774e-07	34	60	7
GO:1901292	nucleoside phosphate catabolic process	c110032_g1,c110032_g2,c137211_g1,c139238_g1,c140023_g1,c151047_g1,c151047_g2,c151047_g4,c154301_g2,c158643_g1,c161865_g1,c181634_g1,c197168_g1,c199516_g1,c199759_g1,c199794_g1,c201148_g1,c204369_g2,c206088_g1,c209207_g1,c210609_g1,c211144_g1,c211285_g1,c212216_g1,c212216_g2,c21544_g1,c220308_g1,c221451_g4,c226869_g1,c228355_g2,c230462_g1,c231134_g6,c320611_g1,c35949_g1	BP	2.2e-08	1.00774e-07	34	60	6
GO:0019752	carboxylic acid metabolic process	c102055_g1,c110032_g1,c110032_g2,c130388_g1,c131317_g1,c137195_g1,c137211_g1,c137472_g1,c137532_g1,c137532_g2,c139238_g1,c140023_g1,c144184_g1,c144434_g1,c148262_g1,c148313_g1,c148834_g1,c149524_g1,c150469_g1,c151047_g1,c151047_g2,c151047_g4,c153099_g1,c153259_g1,c154301_g2,c154738_g1,c158031_g1,c158643_g1,c159481_g1,c161076_g1,c161865_g1,c162045_g1,c162045_g2,c162455_g1,c169632_g1,c170920_g1,c17…	BP	3.1e-08	1.24585e-07	170	508	6
GO:0006091	generation of precursor metabolites and energy	c110032_g1,c110032_g2,c137211_g1,c139238_g1,c140023_g1,c148313_g1,c149524_g1,c151047_g1,c151047_g2,c151047_g4,c154301_g2,c154738_g1,c158643_g1,c161865_g1,c174815_g1,c177014_g1,c179932_g1,c181634_g1,c183933_g1,c186306_g3,c190716_g1,c197168_g1,c199516_g1,c199759_g1,c199794_g1,c201148_g1,c204369_g2,c206088_g1,c208697_g1,c209207_g1,c210609_g1,c211144_g1,c211285_g1,c211423_g1,c212216_g1,c212216_g2,c21…	BP	3.2e-08	1.26222e-07	51	108	4
GO:0072524	pyridine-containing compound metabolic process	c110032_g1,c110032_g2,c137211_g1,c139238_g1,c140023_g1,c148213_g1,c151047_g1,c151047_g2,c151047_g4,c154301_g2,c158643_g1,c161865_g1,c181634_g1,c190639_g1,c197168_g1,c198928_g1,c199516_g1,c199759_g1,c199794_g1,c201148_g1,c204369_g2,c205602_g2,c206088_g1,c209207_g1,c209751_g2,c210398_g1,c210609_g1,c211144_g1,c211285_g1,c212216_g1,c212216_g2,c21544_g1,c220308_g1,c221451_g4,c226869_g1,c228355_g2,c230…	BP	3.7e-08	1.43291e-07	45	91	5
GO:0043436	oxoacid metabolic process	c102055_g1,c102274_g1,c110032_g1,c110032_g2,c130388_g1,c131317_g1,c137195_g1,c137211_g1,c137472_g1,c137532_g1,c137532_g2,c139238_g1,c140023_g1,c144184_g1,c144434_g1,c148262_g1,c148313_g1,c148834_g1,c149524_g1,c150469_g1,c151047_g1,c151047_g2,c151047_g4,c153099_g1,c153259_g1,c154301_g2,c154738_g1,c158031_g1,c158643_g1,c159481_g1,c161076_g1,c161865_g1,c162045_g1,c162045_g2,c162455_g1,c169632_g1,c17…	BP	3.8e-08	1.44536e-07	176	531	5
GO:0006082	organic acid metabolic process	c102055_g1,c102274_g1,c110032_g1,c110032_g2,c130388_g1,c131317_g1,c137195_g1,c137211_g1,c137472_g1,c137532_g1,c137532_g2,c139238_g1,c140023_g1,c144184_g1,c144434_g1,c148262_g1,c148313_g1,c148834_g1,c149524_g1,c150469_g1,c151047_g1,c151047_g2,c151047_g4,c153099_g1,c153259_g1,c154301_g2,c154738_g1,c158031_g1,c158643_g1,c159481_g1,c161076_g1,c161865_g1,c162045_g1,c162045_g2,c162455_g1,c169632_g1,c17…	BP	5.9e-08	2.20474e-07	176	534	4
GO:0019363	pyridine nucleotide biosynthetic process	c110032_g1,c110032_g2,c137211_g1,c139238_g1,c140023_g1,c151047_g1,c151047_g2,c151047_g4,c154301_g2,c158643_g1,c161865_g1,c181634_g1,c190639_g1,c197168_g1,c199516_g1,c199759_g1,c199794_g1,c201148_g1,c204369_g2,c205602_g2,c206088_g1,c209207_g1,c209751_g2,c210609_g1,c211144_g1,c211285_g1,c212216_g1,c212216_g2,c21544_g1,c220308_g1,c221451_g4,c226869_g1,c228355_g2,c230462_g1,c231134_g6,c320611_g1,c359…	BP	6.6e-08	2.42379e-07	37	70	7
GO:0046434	organophosphate catabolic process	c110032_g1,c110032_g2,c137211_g1,c139238_g1,c140023_g1,c151047_g1,c151047_g2,c151047_g4,c154301_g2,c158643_g1,c161865_g1,c181634_g1,c197168_g1,c199516_g1,c199759_g1,c199794_g1,c201148_g1,c204369_g2,c206088_g1,c209207_g1,c210609_g1,c211144_g1,c211285_g1,c212216_g1,c212216_g2,c21544_g1,c220308_g1,c221451_g4,c226869_g1,c228355_g2,c230462_g1,c231134_g6,c320611_g1,c35949_g1	BP	6.8e-08	2.45492e-07	34	62	5
GO:1901135	carbohydrate derivative metabolic process	c108853_g1,c110032_g1,c110032_g2,c130202_g1,c131861_g1,c137211_g1,c139238_g1,c140023_g1,c146942_g1,c148213_g1,c151047_g1,c151047_g2,c151047_g4,c153259_g1,c154301_g2,c158643_g1,c160544_g1,c161865_g1,c162291_g1,c169523_g1,c172511_g1,c173745_g1,c175926_g1,c180412_g1,c181634_g1,c182177_g1,c185357_g1,c185622_g1,c190136_g1,c190136_g2,c197145_g1,c197168_g1,c197597_g1,c197661_g1,c198040_g1,c198069_g1,c19…	BP	7.7e-08	2.7335e-07	99	264	4
GO:0019359	nicotinamide nucleotide biosynthetic process	c110032_g1,c110032_g2,c137211_g1,c139238_g1,c140023_g1,c151047_g1,c151047_g2,c151047_g4,c154301_g2,c158643_g1,c161865_g1,c181634_g1,c197168_g1,c199516_g1,c199759_g1,c199794_g1,c201148_g1,c204369_g2,c205602_g2,c206088_g1,c209207_g1,c209751_g2,c210609_g1,c211144_g1,c211285_g1,c212216_g1,c212216_g2,c21544_g1,c220308_g1,c221451_g4,c226869_g1,c228355_g2,c230462_g1,c231134_g6,c320611_g1,c35949_g1	BP	9.4e-08	3.2823e-07	36	68	8
GO:0009108	coenzyme biosynthetic process	c110032_g1,c110032_g2,c137211_g1,c137472_g1,c139238_g1,c140023_g1,c151047_g1,c151047_g2,c151047_g4,c154301_g2,c158643_g1,c161865_g1,c169198_g1,c170920_g1,c176328_g1,c181634_g1,c186154_g1,c190639_g1,c197168_g1,c198703_g1,c199516_g1,c199759_g1,c199794_g1,c201148_g1,c203633_g1,c204369_g2,c204415_g1,c205182_g1,c205602_g2,c206088_g1,c208759_g1,c209207_g1,c209751_g2,c210204_g1,c210609_g1,c211144_g1,c21…	BP	1.7e-07	5.84032e-07	59	137	6
GO:0017144	drug metabolic process	c108834_g2,c110032_g1,c110032_g2,c137211_g1,c139238_g1,c140023_g1,c146118_g2,c146942_g1,c148313_g1,c148995_g2,c149524_g1,c151047_g1,c151047_g2,c151047_g4,c153099_g1,c154301_g2,c154738_g1,c156181_g1,c158643_g1,c160544_g1,c161865_g1,c162291_g1,c167071_g1,c169523_g1,c172396_g1,c173745_g1,c174467_g1,c174815_g1,c177014_g1,c179932_g1,c181261_g1,c181634_g1,c182177_g1,c183933_g1,c185622_g1,c186306_g3,c19…	BP	1.8e-07	6.08571e-07	113	316	4
GO:0051186	cofactor metabolic process	c110032_g1,c110032_g2,c137195_g1,c137211_g1,c137472_g1,c139238_g1,c140023_g1,c144434_g1,c146118_g2,c148213_g1,c148995_g2,c151047_g1,c151047_g2,c151047_g4,c154301_g2,c158643_g1,c159481_g1,c161865_g1,c162045_g1,c162045_g2,c169198_g1,c170920_g1,c176328_g1,c177014_g1,c181634_g1,c186154_g1,c187223_g1,c187783_g1,c190639_g1,c197102_g1,c197168_g1,c197282_g1,c198703_g1,c198928_g1,c199516_g1,c199759_g1,c19…	BP	3.8e-07	1.26469e-06	100	275	4
GO:0072525	pyridine-containing compound biosynthetic process	c110032_g1,c110032_g2,c137211_g1,c139238_g1,c140023_g1,c151047_g1,c151047_g2,c151047_g4,c154301_g2,c158643_g1,c161865_g1,c181634_g1,c190639_g1,c197168_g1,c199516_g1,c199759_g1,c199794_g1,c201148_g1,c204369_g2,c205602_g2,c206088_g1,c209207_g1,c209751_g2,c210609_g1,c211144_g1,c211285_g1,c212216_g1,c212216_g2,c21544_g1,c220308_g1,c221451_g4,c226869_g1,c228355_g2,c230462_g1,c231134_g6,c302597_g1,c320…	BP	4.5e-07	1.47462e-06	38	77	6
GO:0034655	nucleobase-containing compound catabolic process	c110032_g1,c110032_g2,c137211_g1,c139238_g1,c140023_g1,c151047_g1,c151047_g2,c151047_g4,c154301_g2,c158643_g1,c161865_g1,c176832_g1,c177576_g1,c181634_g1,c195113_g1,c196760_g1,c197168_g1,c199516_g1,c199759_g1,c199794_g1,c201148_g1,c204369_g2,c206088_g1,c209207_g1,c210609_g1,c211144_g1,c211285_g1,c212216_g1,c212216_g2,c21544_g1,c220308_g1,c221161_g2,c221451_g4,c226869_g1,c228355_g2,c229559_g4,c230…	BP	7.9e-07	2.54955e-06	42	90	5
GO:0006090	pyruvate metabolic process	c110032_g1,c110032_g2,c137211_g1,c139238_g1,c140023_g1,c151047_g1,c151047_g2,c151047_g4,c154301_g2,c158643_g1,c161865_g1,c181634_g1,c197168_g1,c199516_g1,c199759_g1,c199794_g1,c201148_g1,c204369_g2,c206088_g1,c209207_g1,c210609_g1,c211144_g1,c211285_g1,c212216_g1,c212216_g2,c21544_g1,c220308_g1,c221451_g4,c226869_g1,c228355_g2,c230462_g1,c231134_g6,c320611_g1,c35949_g1	BP	1.9e-06	6.0403e-06	34	69	8
GO:0019637	organophosphate metabolic process	c110032_g1,c110032_g2,c137211_g1,c139238_g1,c140023_g1,c146942_g1,c148213_g1,c151047_g1,c151047_g2,c151047_g4,c153259_g1,c154301_g2,c158643_g1,c160544_g1,c161865_g1,c162291_g1,c169523_g1,c173745_g1,c180629_g1,c181634_g1,c182177_g1,c185622_g1,c186154_g1,c190282_g2,c190639_g1,c194549_g1,c197040_g1,c197145_g1,c197168_g1,c197267_g1,c197597_g1,c198040_g1,c198069_g1,c198119_g3,c198703_g1,c198928_g1,c19…	BP	2.5e-06	7.83088e-06	96	271	4
GO:0044283	small molecule biosynthetic process	c102055_g1,c108834_g2,c110032_g1,c110032_g2,c130388_g1,c131317_g1,c137211_g1,c137472_g1,c137532_g1,c137532_g2,c139238_g1,c140023_g1,c144184_g1,c148262_g1,c148834_g1,c151047_g1,c151047_g2,c151047_g4,c153259_g1,c154301_g2,c156181_g1,c158031_g1,c158643_g1,c161865_g1,c162291_g1,c162455_g1,c169198_g1,c170920_g1,c173745_g1,c173863_g1,c174467_g1,c176328_g1,c176474_g1,c177445_g2,c178792_g1,c181634_g1,c18…	BP	3.3e-06	1.0187e-05	140	430	4
GO:0019439	aromatic compound catabolic process	c110032_g1,c110032_g2,c137211_g1,c139238_g1,c140023_g1,c151047_g1,c151047_g2,c151047_g4,c153099_g1,c154301_g2,c158643_g1,c161865_g1,c176832_g1,c177576_g1,c181634_g1,c195113_g1,c196760_g1,c197168_g1,c199516_g1,c199759_g1,c199794_g1,c201148_g1,c204100_g1,c204369_g2,c206088_g1,c209207_g1,c210609_g1,c211144_g1,c211285_g1,c212216_g1,c212216_g2,c21544_g1,c216674_g1,c220308_g1,c221161_g2,c221451_g4,c226…	BP	4.1e-06	1.24757e-05	46	107	5
GO:0071702	organic substance transport	c102060_g1,c109154_g1,c109515_g1,c125359_g1,c128059_g1,c129594_g3,c132005_g1,c132271_g1,c136965_g1,c137010_g1,c137181_g1,c139407_g1,c144062_g1,c146605_g1,c148445_g1,c151769_g1,c154595_g1,c156305_g1,c157250_g1,c157721_g1,c161062_g1,c161985_g1,c162657_g1,c162695_g1,c165956_g1,c169625_g1,c169637_g1,c170129_g1,c173844_g1,c174612_g1,c174833_g1,c175921_g1,c177576_g1,c179733_g1,c179786_g1,c180810_g1,c18…	BP	5.1e-06	1.53e-05	180	582	5
GO:0044270	cellular nitrogen compound catabolic process	c110032_g1,c110032_g2,c137211_g1,c139238_g1,c140023_g1,c151047_g1,c151047_g2,c151047_g4,c153099_g1,c154301_g2,c158643_g1,c161865_g1,c176832_g1,c177576_g1,c181634_g1,c195113_g1,c196760_g1,c197168_g1,c199516_g1,c199759_g1,c199794_g1,c201148_g1,c204100_g1,c204369_g2,c206088_g1,c209207_g1,c210609_g1,c211144_g1,c211285_g1,c212216_g1,c212216_g2,c21544_g1,c216674_g1,c220308_g1,c221161_g2,c221451_g4,c226…	BP	5.8e-06	1.71583e-05	45	105	5
GO:0046700	heterocycle catabolic process	c110032_g1,c110032_g2,c137211_g1,c139238_g1,c140023_g1,c151047_g1,c151047_g2,c151047_g4,c153099_g1,c154301_g2,c158643_g1,c161865_g1,c176832_g1,c177576_g1,c181634_g1,c195113_g1,c196760_g1,c197168_g1,c199516_g1,c199759_g1,c199794_g1,c201148_g1,c204100_g1,c204369_g2,c206088_g1,c209207_g1,c210609_g1,c211144_g1,c211285_g1,c212216_g1,c212216_g2,c21544_g1,c216674_g1,c220308_g1,c221161_g2,c221451_g4,c226…	BP	1.1e-05	3.20959e-05	45	107	5
GO:0090407	organophosphate biosynthetic process	c110032_g1,c110032_g2,c137211_g1,c139238_g1,c140023_g1,c146942_g1,c151047_g1,c151047_g2,c151047_g4,c153259_g1,c154301_g2,c158643_g1,c160544_g1,c161865_g1,c162291_g1,c169523_g1,c173745_g1,c180629_g1,c181634_g1,c182177_g1,c185622_g1,c186154_g1,c190639_g1,c194549_g1,c197040_g1,c197145_g1,c197168_g1,c197597_g1,c198040_g1,c198069_g1,c198119_g3,c198703_g1,c199516_g1,c199759_g1,c199794_g1,c201148_g1,c20…	BP	2.1e-05	6.04459e-05	82	234	5
GO:1901566	organonitrogen compound biosynthetic process	c102055_g1,c108834_g2,c108853_g1,c110032_g1,c110032_g2,c128775_g1,c130202_g1,c136954_g1,c137211_g1,c137472_g1,c137532_g1,c137532_g2,c137676_g1,c139238_g1,c140023_g1,c146942_g1,c151047_g1,c151047_g2,c151047_g4,c153206_g1,c153259_g1,c154301_g2,c156181_g1,c158031_g1,c158643_g1,c160544_g1,c161151_g1,c161865_g1,c162291_g1,c169473_g1,c169523_g1,c171330_g2,c171330_g3,c172511_g1,c173745_g1,c174467_g1,c17…	BP	2.5e-05	7.1e-05	186	619	5
GO:0051188	cofactor biosynthetic process	c110032_g1,c110032_g2,c137211_g1,c137472_g1,c139238_g1,c140023_g1,c151047_g1,c151047_g2,c151047_g4,c154301_g2,c158643_g1,c161865_g1,c169198_g1,c170920_g1,c176328_g1,c181634_g1,c186154_g1,c187223_g1,c190639_g1,c197168_g1,c198703_g1,c199516_g1,c199759_g1,c199794_g1,c201148_g1,c203633_g1,c204369_g2,c204415_g1,c205182_g1,c205602_g2,c206088_g1,c206193_g1,c208759_g1,c209207_g1,c209751_g2,c210204_g1,c21…	BP	2.7e-05	7.56711e-05	66	180	5
GO:1901361	organic cyclic compound catabolic process	c110032_g1,c110032_g2,c137211_g1,c139238_g1,c140023_g1,c151047_g1,c151047_g2,c151047_g4,c153099_g1,c154301_g2,c158643_g1,c161865_g1,c176832_g1,c177576_g1,c181634_g1,c195113_g1,c196760_g1,c197168_g1,c199516_g1,c199759_g1,c199794_g1,c201148_g1,c204100_g1,c204369_g2,c206088_g1,c209207_g1,c210609_g1,c211144_g1,c211285_g1,c212216_g1,c212216_g2,c21544_g1,c216674_g1,c220308_g1,c221161_g2,c221451_g4,c226…	BP	3e-05	8.2987e-05	46	114	5
GO:1901657	glycosyl compound metabolic process	c153259_g1,c162291_g1,c173745_g1,c175926_g1,c190136_g2,c197145_g1,c197597_g1,c198119_g3,c200306_g1,c208395_g1,c217065_g1,c224117_g2,c224117_g8,c225822_g3,c229271_g9	BP	0.00016	0.00043414	15	26	5
GO:1901659	glycosyl compound biosynthetic process	c153259_g1,c162291_g1,c173745_g1,c175926_g1,c190136_g2,c197145_g1,c197597_g1,c198119_g3,c200306_g1,c208395_g1,c217065_g1,c224117_g2,c224117_g8,c225822_g3,c229271_g9	BP	0.00016	0.00043414	15	26	6
GO:0042278	purine nucleoside metabolic process	c162291_g1,c173745_g1,c190136_g2,c197597_g1,c208395_g1,c224117_g2,c224117_g8	BP	0.00023	0.000601104	7	8	6
GO:0042451	purine nucleoside biosynthetic process	c162291_g1,c173745_g1,c190136_g2,c197597_g1,c208395_g1,c224117_g2,c224117_g8	BP	0.00023	0.000601104	7	8	7
GO:0046128	purine ribonucleoside metabolic process	c162291_g1,c173745_g1,c190136_g2,c197597_g1,c208395_g1,c224117_g2,c224117_g8	BP	0.00023	0.000601104	7	8	7
GO:0046129	purine ribonucleoside biosynthetic process	c162291_g1,c173745_g1,c190136_g2,c197597_g1,c208395_g1,c224117_g2,c224117_g8	BP	0.00023	0.000601104	7	8	8
GO:1901564	organonitrogen compound metabolic process	c100976_g1,c102055_g1,c103118_g1,c108834_g2,c108853_g1,c108871_g1,c110032_g1,c110032_g2,c113977_g2,c126236_g1,c128775_g1,c130202_g1,c131348_g1,c136954_g1,c137195_g1,c137208_g1,c137211_g1,c137472_g1,c137532_g1,c137532_g2,c137676_g1,c139238_g1,c140023_g1,c144222_g1,c144266_g1,c144434_g1,c146942_g1,c148213_g1,c149557_g1,c150469_g1,c151047_g1,c151047_g2,c151047_g4,c153099_g1,c153206_g1,c153259_g1,c15…	BP	0.00026	0.000659286	399	1497	4
GO:0005975	carbohydrate metabolic process	c10609_g1,c110032_g1,c110032_g2,c130963_g1,c131861_g1,c137211_g1,c139238_g1,c139430_g1,c140023_g1,c146940_g1,c151047_g1,c151047_g2,c151047_g4,c154301_g2,c158643_g1,c160967_g1,c160988_g1,c161197_g1,c161865_g1,c167071_g1,c170920_g1,c173863_g1,c176736_g1,c180412_g1,c181035_g1,c181261_g1,c181634_g1,c184713_g1,c186381_g1,c193411_g2,c193921_g1,c196911_g1,c197009_g1,c197168_g1,c198494_g1,c198927_g1,c198…	BP	0.00031	0.000776824	113	365	4
GO:0016053	organic acid biosynthetic process	c102055_g1,c110032_g1,c110032_g2,c130388_g1,c131317_g1,c137211_g1,c137472_g1,c137532_g1,c137532_g2,c139238_g1,c140023_g1,c144184_g1,c148262_g1,c148834_g1,c151047_g1,c151047_g2,c151047_g4,c153259_g1,c154301_g2,c158031_g1,c158643_g1,c161865_g1,c162455_g1,c170920_g1,c176328_g1,c176474_g1,c177445_g2,c178792_g1,c181634_g1,c182497_g1,c185526_g1,c185658_g1,c185968_g1,c187166_g1,c197168_g1,c198415_g1,c19…	BP	0.00039	0.000960347	109	352	5
GO:0046394	carboxylic acid biosynthetic process	c102055_g1,c110032_g1,c110032_g2,c130388_g1,c131317_g1,c137211_g1,c137472_g1,c137532_g1,c137532_g2,c139238_g1,c140023_g1,c144184_g1,c148262_g1,c148834_g1,c151047_g1,c151047_g2,c151047_g4,c153259_g1,c154301_g2,c158031_g1,c158643_g1,c161865_g1,c162455_g1,c170920_g1,c176328_g1,c176474_g1,c177445_g2,c178792_g1,c181634_g1,c182497_g1,c185526_g1,c185658_g1,c185968_g1,c187166_g1,c197168_g1,c198415_g1,c19…	BP	0.00039	0.000960347	109	352	6
GO:0005996	monosaccharide metabolic process	c110032_g1,c110032_g2,c131861_g1,c170920_g1,c180412_g1,c181035_g1,c184713_g1,c196911_g1,c199794_g1,c2005_g1,c206088_g1,c206441_g3,c210398_g1,c212088_g1,c212216_g1,c212216_g2,c217361_g1,c217361_g2,c217836_g1,c227698_g1,c230576_g2,c27016_g1	BP	0.00046	0.00111341	22	48	4
GO:0033036	macromolecule localization	c102060_g1,c109154_g1,c109515_g1,c125359_g1,c128059_g1,c129594_g3,c132005_g1,c132271_g1,c136965_g1,c137010_g1,c139407_g1,c144062_g1,c148445_g1,c151769_g1,c156305_g1,c157250_g1,c157721_g1,c161062_g1,c161985_g1,c162657_g1,c162695_g1,c165956_g1,c169625_g1,c169637_g1,c170129_g1,c173844_g1,c174612_g1,c174833_g1,c175921_g1,c177576_g1,c179733_g1,c179786_g1,c180810_g1,c180810_g2,c180879_g1,c183497_g1,c18…	BP	0.00052	0.00124449	130	434	3
GO:0006099	tricarboxylic acid cycle	c148313_g1,c149524_g1,c154738_g1,c174815_g1,c177014_g1,c179932_g1,c183933_g1,c186306_g3,c190716_g1,c208697_g1,c211423_g1,c213599_g2,c219549_g1,c219549_g2,c226961_g4,c232236_g3,c39850_g1	BP	0.00059	0.00137344	17	34	4
GO:0006101	citrate metabolic process	c148313_g1,c149524_g1,c154738_g1,c174815_g1,c177014_g1,c179932_g1,c183933_g1,c186306_g3,c190716_g1,c208697_g1,c211423_g1,c213599_g2,c219549_g1,c219549_g2,c226961_g4,c232236_g3,c39850_g1	BP	0.00059	0.00137344	17	34	8
GO:0009060	aerobic respiration	c148313_g1,c149524_g1,c154738_g1,c174815_g1,c177014_g1,c179932_g1,c183933_g1,c186306_g3,c190716_g1,c208697_g1,c211423_g1,c213599_g2,c219549_g1,c219549_g2,c226961_g4,c232236_g3,c39850_g1	BP	0.00059	0.00137344	17	34	6
GO:0072350	tricarboxylic acid metabolic process	c148313_g1,c149524_g1,c154738_g1,c174815_g1,c177014_g1,c179932_g1,c183933_g1,c186306_g3,c190716_g1,c208697_g1,c211423_g1,c213599_g2,c219549_g1,c219549_g2,c226961_g4,c232236_g3,c39850_g1	BP	0.00059	0.00137344	17	34	7
GO:0098656	anion transmembrane transport	c154595_g1,c193467_g1,c205077_g1,c210373_g1,c210413_g1,c223232_g1,c225965_g1,c228671_g1,c230095_g2,c250820_g1,c90267_g1	BP	0.00063	0.00142755	11	18	7
GO:0044248	cellular catabolic process	c110032_g1,c110032_g2,c130963_g1,c137211_g1,c139238_g1,c140023_g1,c146118_g2,c148995_g2,c150469_g1,c151047_g1,c151047_g2,c151047_g4,c153099_g1,c154301_g2,c157250_g1,c158643_g1,c161865_g1,c176832_g1,c177014_g1,c177576_g1,c181261_g1,c181634_g1,c186285_g1,c187939_g1,c193411_g2,c195113_g1,c195963_g1,c196760_g1,c197168_g1,c197282_g1,c199516_g1,c199759_g1,c199794_g1,c199857_g1,c201148_g1,c204100_g1,c20…	BP	0.00064	0.00143495	91	289	4
GO:0016052	carbohydrate catabolic process	c110032_g1,c110032_g2,c130963_g1,c137211_g1,c139238_g1,c140023_g1,c151047_g1,c151047_g2,c151047_g4,c154301_g2,c158643_g1,c160967_g1,c161865_g1,c181261_g1,c181634_g1,c193411_g2,c197168_g1,c199516_g1,c199759_g1,c199794_g1,c199857_g1,c201148_g1,c204369_g2,c205205_g1,c206088_g1,c207990_g1,c207990_g2,c209207_g1,c210282_g2,c210609_g1,c211032_g1,c211144_g1,c211285_g1,c212216_g1,c212216_g2,c215382_g1,c21…	BP	0.00089	0.00197469	50	143	5
GO:0015980	energy derivation by oxidation of organic compounds	c148313_g1,c149524_g1,c154738_g1,c174815_g1,c177014_g1,c179932_g1,c183933_g1,c186306_g3,c190716_g1,c208697_g1,c211423_g1,c213599_g2,c219549_g1,c219549_g2,c226961_g4,c232236_g3,c39850_g1	BP	0.0009	0.00195612	17	35	4
GO:0045333	cellular respiration	c148313_g1,c149524_g1,c154738_g1,c174815_g1,c177014_g1,c179932_g1,c183933_g1,c186306_g3,c190716_g1,c208697_g1,c211423_g1,c213599_g2,c219549_g1,c219549_g2,c226961_g4,c232236_g3,c39850_g1	BP	0.0009	0.00195612	17	35	5
GO:0071705	nitrogen compound transport	c102060_g1,c109154_g1,c109515_g1,c125359_g1,c128059_g1,c132005_g1,c132271_g1,c136965_g1,c137010_g1,c139407_g1,c144062_g1,c148445_g1,c151769_g1,c156305_g1,c157250_g1,c157721_g1,c161062_g1,c161985_g1,c162657_g1,c162695_g1,c165956_g1,c169625_g1,c169637_g1,c170129_g1,c173844_g1,c174612_g1,c174833_g1,c175921_g1,c177576_g1,c179733_g1,c179786_g1,c180810_g1,c180810_g2,c180879_g1,c183839_g1,c184535_g1,c18…	BP	0.0009	0.00195612	140	478	5
GO:0006508	proteolysis	c100976_g1,c108871_g1,c137208_g1,c144266_g1,c149557_g1,c154790_g1,c156247_g1,c157492_g1,c169578_g1,c169674_g1,c176154_g3,c176172_g2,c177087_g1,c177356_g1,c184669_g1,c184727_g1,c186285_g1,c186467_g1,c187091_g1,c190578_g1,c190594_g1,c190607_g1,c192811_g1,c194396_g2,c194503_g1,c195598_g1,c195685_g1,c197684_g1,c199102_g1,c199404_g1,c199573_g1,c199799_g1,c199822_g1,c199822_g2,c200094_g1,c201825_g1,c20…	BP	0.00127	0.00267832	112	374	5
GO:0015031	protein transport	c102060_g1,c109154_g1,c109515_g1,c125359_g1,c128059_g1,c132005_g1,c132271_g1,c136965_g1,c137010_g1,c144062_g1,c148445_g1,c151769_g1,c156305_g1,c157250_g1,c157721_g1,c161062_g1,c161985_g1,c162657_g1,c162695_g1,c165956_g1,c169625_g1,c169637_g1,c170129_g1,c173844_g1,c174612_g1,c175921_g1,c179733_g1,c180810_g1,c180810_g2,c180879_g1,c183839_g1,c184535_g1,c187773_g1,c188034_g1,c188060_g1,c190185_g1,c19…	BP	0.00127	0.00267832	112	374	5
GO:0015833	peptide transport	c102060_g1,c109154_g1,c109515_g1,c125359_g1,c128059_g1,c132005_g1,c132271_g1,c136965_g1,c137010_g1,c144062_g1,c148445_g1,c151769_g1,c156305_g1,c157250_g1,c157721_g1,c161062_g1,c161985_g1,c162657_g1,c162695_g1,c165956_g1,c169625_g1,c169637_g1,c170129_g1,c173844_g1,c174612_g1,c175921_g1,c179733_g1,c180810_g1,c180810_g2,c180879_g1,c183839_g1,c184535_g1,c187773_g1,c188034_g1,c188060_g1,c190185_g1,c19…	BP	0.00127	0.00267832	112	374	6
GO:0006575	cellular modified amino acid metabolic process	c137195_g1,c137472_g1,c144434_g1,c159481_g1,c162045_g1,c162045_g2,c187783_g1,c203633_g1,c204415_g1,c205001_g1,c209171_g1,c211109_g1,c214371_g7,c222769_g1,c222769_g2,c225676_g1,c226165_g1,c250059_g1	BP	0.00135	0.00279175	18	39	4
GO:0009116	nucleoside metabolic process	c153259_g1,c162291_g1,c173745_g1,c190136_g2,c197145_g1,c197597_g1,c198119_g3,c208395_g1,c217065_g1,c224117_g2,c224117_g8,c225822_g3	BP	0.00144	0.0029073	12	22	5
GO:0009119	ribonucleoside metabolic process	c153259_g1,c162291_g1,c173745_g1,c190136_g2,c197145_g1,c197597_g1,c198119_g3,c208395_g1,c217065_g1,c224117_g2,c224117_g8,c225822_g3	BP	0.00144	0.0029073	12	22	6
GO:0009163	nucleoside biosynthetic process	c153259_g1,c162291_g1,c173745_g1,c190136_g2,c197145_g1,c197597_g1,c198119_g3,c208395_g1,c217065_g1,c224117_g2,c224117_g8,c225822_g3	BP	0.00144	0.0029073	12	22	6
GO:0042455	ribonucleoside biosynthetic process	c153259_g1,c162291_g1,c173745_g1,c190136_g2,c197145_g1,c197597_g1,c198119_g3,c208395_g1,c217065_g1,c224117_g2,c224117_g8,c225822_g3	BP	0.00144	0.0029073	12	22	7
GO:0042886	amide transport	c102060_g1,c109154_g1,c109515_g1,c125359_g1,c128059_g1,c132005_g1,c132271_g1,c136965_g1,c137010_g1,c144062_g1,c148445_g1,c151769_g1,c156305_g1,c157250_g1,c157721_g1,c161062_g1,c161985_g1,c162657_g1,c162695_g1,c165956_g1,c169625_g1,c169637_g1,c170129_g1,c173844_g1,c174612_g1,c175921_g1,c179733_g1,c180810_g1,c180810_g2,c180879_g1,c183839_g1,c184535_g1,c187773_g1,c188034_g1,c188060_g1,c190185_g1,c19…	BP	0.00172	0.00339222	112	377	6
GO:0019318	hexose metabolic process	c110032_g1,c110032_g2,c131861_g1,c181035_g1,c184713_g1,c196911_g1,c199794_g1,c2005_g1,c206088_g1,c206441_g3,c212088_g1,c212216_g1,c212216_g2,c227698_g1,c230576_g2,c27016_g1	BP	0.00193	0.00377147	16	34	5
GO:0045184	establishment of protein localization	c102060_g1,c109154_g1,c109515_g1,c125359_g1,c128059_g1,c132005_g1,c132271_g1,c136965_g1,c137010_g1,c144062_g1,c148445_g1,c151769_g1,c156305_g1,c157250_g1,c157721_g1,c161062_g1,c161985_g1,c162657_g1,c162695_g1,c165956_g1,c169625_g1,c169637_g1,c170129_g1,c173844_g1,c174612_g1,c175921_g1,c179733_g1,c180810_g1,c180810_g2,c180879_g1,c183839_g1,c184535_g1,c187773_g1,c188034_g1,c188060_g1,c190185_g1,c19…	BP	0.0021	0.00406636	112	379	4
GO:0008104	protein localization	c102060_g1,c109154_g1,c109515_g1,c125359_g1,c128059_g1,c132005_g1,c132271_g1,c136965_g1,c137010_g1,c144062_g1,c148445_g1,c151769_g1,c156305_g1,c157250_g1,c157721_g1,c161062_g1,c161985_g1,c162657_g1,c162695_g1,c165956_g1,c169625_g1,c169637_g1,c170129_g1,c173844_g1,c174612_g1,c175921_g1,c179733_g1,c180810_g1,c180810_g2,c180879_g1,c183839_g1,c184535_g1,c187773_g1,c188034_g1,c188060_g1,c190185_g1,c19…	BP	0.00258	0.00495081	113	385	4
GO:1901661	quinone metabolic process	c169198_g1,c210204_g1,c213917_g5,c218761_g1,c226776_g2,c28036_g1	BP	0.00282	0.00529216	6	8	5
GO:1901663	quinone biosynthetic process	c169198_g1,c210204_g1,c213917_g5,c218761_g1,c226776_g2,c28036_g1	BP	0.00282	0.00529216	6	8	6
GO:1903825	organic acid transmembrane transport	c154595_g1,c193467_g1,c210373_g1,c225965_g1,c250820_g1,c90267_g1	BP	0.00282	0.00529216	6	8	6
GO:1905039	carboxylic acid transmembrane transport	c154595_g1,c193467_g1,c210373_g1,c225965_g1,c250820_g1,c90267_g1	BP	0.00282	0.00529216	6	8	7
GO:0032787	monocarboxylic acid metabolic process	c110032_g1,c110032_g2,c130388_g1,c137211_g1,c137472_g1,c139238_g1,c140023_g1,c144184_g1,c148262_g1,c148834_g1,c151047_g1,c151047_g2,c151047_g4,c154301_g2,c158643_g1,c161076_g1,c161865_g1,c162455_g1,c169632_g1,c176328_g1,c177445_g2,c180363_g1,c181634_g1,c185526_g1,c185658_g1,c185968_g1,c187939_g1,c188049_g1,c196877_g1,c197168_g1,c197329_g1,c199365_g2,c199516_g1,c199759_g1,c199794_g1,c201148_g1,c20…	BP	0.00296	0.00543517	83	272	7
GO:0006760	folic acid-containing compound metabolic process	c137195_g1,c144434_g1,c159481_g1,c162045_g1,c162045_g2,c203633_g1,c204415_g1,c205001_g1,c209171_g1,c211109_g1,c214371_g7,c225676_g1	BP	0.00378	0.00688154	12	24	5
GO:0008643	carbohydrate transport	c137181_g1,c146605_g1,c154595_g1,c186430_g2,c190442_g1,c190498_g1,c193467_g1,c194778_g1,c196889_g1,c196920_g2,c197545_g1,c204352_g2,c205077_g1,c210216_g1,c210373_g1,c210413_g1,c210647_g2,c211620_g2,c211826_g1,c211826_g2,c214036_g2,c220277_g2,c221409_g1,c221704_g1,c223232_g1,c224817_g3,c226103_g2,c228454_g2,c229896_g2,c231497_g1,c231884_g1,c232424_g1,c321102_g1	BP	0.00402	0.00722582	33	92	6
GO:0055114	oxidation-reduction process	c102274_g1,c108880_g1,c109744_g1,c126221_g1,c130388_g1,c130963_g1,c131273_g1,c131317_g1,c131737_g1,c131842_g1,c136974_g1,c137195_g1,c137211_g1,c138498_g1,c139238_g1,c139430_g1,c144434_g1,c144571_g1,c146118_g2,c148313_g1,c148365_g1,c148834_g1,c148995_g2,c149524_g1,c153995_g1,c154738_g1,c155188_g1,c160340_g1,c161071_g1,c162455_g1,c162704_g1,c162781_g1,c169632_g1,c170920_g1,c171525_g1,c174815_g1,c17…	BP	0.00402	0.00722582	225	834	3
GO:0072330	monocarboxylic acid biosynthetic process	c110032_g1,c110032_g2,c130388_g1,c137211_g1,c137472_g1,c139238_g1,c140023_g1,c144184_g1,c148262_g1,c148834_g1,c151047_g1,c151047_g2,c151047_g4,c154301_g2,c158643_g1,c161865_g1,c162455_g1,c176328_g1,c177445_g2,c181634_g1,c185526_g1,c185658_g1,c185968_g1,c197168_g1,c199365_g2,c199516_g1,c199759_g1,c199794_g1,c201148_g1,c204317_g1,c204369_g2,c206088_g1,c207198_g1,c209207_g1,c210609_g1,c211144_g1,c21…	BP	0.00537	0.00953175	60	191	7
GO:0046653	tetrahydrofolate metabolic process	c137195_g1,c144434_g1,c159481_g1,c162045_g1,c162045_g2,c203633_g1,c204415_g1,c205001_g1,c209171_g1,c211109_g1,c214371_g7	BP	0.00552	0.00971702	11	22	6
GO:0042558	pteridine-containing compound metabolic process	c137195_g1,c144434_g1,c159481_g1,c162045_g1,c162045_g2,c203633_g1,c204415_g1,c205001_g1,c209171_g1,c211109_g1,c214371_g7,c225676_g1	BP	0.00575	0.0100389	12	25	5
GO:0006520	cellular amino acid metabolic process	c102055_g1,c137532_g1,c137532_g2,c150469_g1,c153099_g1,c153259_g1,c158031_g1,c176474_g1,c177014_g1,c178792_g1,c182497_g1,c187166_g1,c195963_g1,c197102_g1,c198415_g1,c201346_g1,c204438_g1,c209049_g1,c209518_g2,c210032_g1,c210299_g3,c210802_g1,c211330_g2,c213930_g2,c214091_g1,c214135_g1,c214135_g2,c214371_g7,c214371_g9,c214651_g1,c215328_g1,c215659_g1,c216074_g3,c216473_g2,c217180_g1,c217912_g1,c21…	BP	0.00625	0.0108232	54	170	4
GO:0042726	flavin-containing compound metabolic process	c108834_g2,c174467_g1,c186154_g1,c198703_g1,c207742_g1,c228647_g3,c228671_g1,c229947_g1	BP	0.00642	0.0110279	8	14	5
GO:0042181	ketone biosynthetic process	c169198_g1,c210204_g1,c213917_g5,c218761_g1,c226776_g2,c28036_g1	BP	0.0068	0.0115872	6	9	5
GO:1901605	alpha-amino acid metabolic process	c137532_g1,c137532_g2,c150469_g1,c153099_g1,c153259_g1,c158031_g1,c176474_g1,c177014_g1,c178792_g1,c182497_g1,c187166_g1,c195963_g1,c197102_g1,c198415_g1,c201346_g1,c204438_g1,c209049_g1,c209518_g2,c210299_g3,c210802_g1,c211330_g2,c213930_g2,c214091_g1,c214135_g1,c214135_g2,c214371_g7,c214371_g9,c214651_g1,c215328_g1,c215659_g1,c216074_g3,c216473_g2,c219568_g5,c224199_g3,c224995_g1,c225949_g1,c22…	BP	0.00752	0.0127124	49	153	5
GO:0006006	glucose metabolic process	c110032_g1,c110032_g2,c184713_g1,c199794_g1,c2005_g1,c206088_g1,c212216_g1,c212216_g2,c230576_g2,c27016_g1	BP	0.00808	0.0135515	10	20	6
GO:0006730	one-carbon metabolic process	c137195_g1,c144434_g1,c159481_g1,c162045_g1,c162045_g2,c204415_g1,c205001_g1,c209171_g1,c211109_g1,c225676_g1,c225926_g5,c225926_g6,c90003_g1	BP	0.00835	0.0138949	13	29	4
GO:0006743	ubiquinone metabolic process	c169198_g1,c210204_g1,c213917_g5,c226776_g2,c28036_g1	BP	0.00925	0.0148698	5	7	6
GO:0006744	ubiquinone biosynthetic process	c169198_g1,c210204_g1,c213917_g5,c226776_g2,c28036_g1	BP	0.00925	0.0148698	5	7	7
GO:0008216	spermidine metabolic process	c190136_g2,c220427_g2,c224117_g2,c224117_g8,c285144_g1	BP	0.00925	0.0148698	5	7	5
GO:0008295	spermidine biosynthetic process	c190136_g2,c220427_g2,c224117_g2,c224117_g8,c285144_g1	BP	0.00925	0.0148698	5	7	6
GO:0015718	monocarboxylic acid transport	c154595_g1,c193467_g1,c205077_g1,c210373_g1,c210413_g1	BP	0.00925	0.0148698	5	7	8
GO:0015748	organophosphate ester transport	c154595_g1,c187939_g1,c193467_g1,c205077_g1,c210413_g1	BP	0.00925	0.0148698	5	7	6
GO:0033319	UDP-D-xylose metabolic process	c180412_g1,c208356_g2,c213620_g1,c213620_g2,c217836_g1	BP	0.00925	0.0148698	5	7	5
GO:0033320	UDP-D-xylose biosynthetic process	c180412_g1,c208356_g2,c213620_g1,c213620_g2,c217836_g1	BP	0.00925	0.0148698	5	7	6
GO:0019395	fatty acid oxidation	c187939_g1,c188049_g1,c209581_g1,c213849_g1,c221650_g3,c221650_g4,c230856_g4	BP	0.00937	0.014515	7	12	5
GO:0034440	lipid oxidation	c187939_g1,c188049_g1,c209581_g1,c213849_g1,c221650_g3,c221650_g4,c230856_g4	BP	0.00937	0.014515	7	12	4
GO:0051234	establishment of localization	c101450_g1,c101862_g1,c102060_g1,c109154_g1,c109515_g1,c109806_g1,c125359_g1,c126127_g1,c128059_g1,c129594_g3,c132005_g1,c132235_g1,c132271_g1,c136965_g1,c137010_g1,c137181_g1,c137210_g1,c139407_g1,c144062_g1,c144698_g1,c146605_g1,c146942_g1,c148445_g1,c150204_g1,c151654_g1,c151769_g1,c152081_g1,c153217_g1,c154595_g1,c15532_g1,c156305_g1,c156442_g1,c157250_g1,c157721_g1,c160060_g1,c160544_g1,c161…	BP	0.01134	0.0173771	336	1308	3
GO:0009226	nucleotide-sugar biosynthetic process	c131861_g1,c180412_g1,c190136_g1,c200690_g1,c205192_g1,c205703_g1,c206434_g1,c207059_g1,c208356_g2,c213620_g1,c213620_g2,c217836_g1,c226435_g2	BP	0.01166	0.0177399	13	30	6
GO:0051179	localization	c101450_g1,c101862_g1,c102060_g1,c109154_g1,c109515_g1,c109806_g1,c125359_g1,c126127_g1,c128059_g1,c129594_g3,c132005_g1,c132235_g1,c132271_g1,c136965_g1,c137010_g1,c137181_g1,c137210_g1,c139407_g1,c144062_g1,c144698_g1,c146605_g1,c146942_g1,c148445_g1,c150204_g1,c151654_g1,c151769_g1,c152081_g1,c153217_g1,c154595_g1,c15532_g1,c156305_g1,c156442_g1,c157250_g1,c157721_g1,c160060_g1,c160544_g1,c161…	BP	0.01171	0.0176896	338	1317	2
GO:0006167	AMP biosynthetic process	c162291_g1,c173745_g1,c198069_g1,c208395_g1	BP	0.01186	0.0174822	4	5	6
GO:0010431	seed maturation	c130240_g1,c161865_g1,c188049_g1,c213273_g1	BP	0.01186	0.0174822	4	5	4
GO:0015717	triose phosphate transport	c154595_g1,c193467_g1,c205077_g1,c210413_g1	BP	0.01186	0.0174822	4	5	7
GO:0035436	triose phosphate transmembrane transport	c154595_g1,c193467_g1,c205077_g1,c210413_g1	BP	0.01186	0.0174822	4	5	7
GO:0046033	AMP metabolic process	c162291_g1,c173745_g1,c198069_g1,c208395_g1	BP	0.01186	0.0174822	4	5	5
GO:0055078	sodium ion homeostasis	c130240_g1,c156305_g1,c213209_g1,c213209_g3	BP	0.01186	0.0174822	4	5	9
GO:0006810	transport	c101450_g1,c101862_g1,c102060_g1,c109154_g1,c109515_g1,c109806_g1,c125359_g1,c126127_g1,c128059_g1,c129594_g3,c132005_g1,c132235_g1,c132271_g1,c136965_g1,c137010_g1,c137181_g1,c137210_g1,c139407_g1,c144062_g1,c144698_g1,c146605_g1,c146942_g1,c148445_g1,c150204_g1,c151654_g1,c151769_g1,c152081_g1,c153217_g1,c154595_g1,c15532_g1,c156305_g1,c156442_g1,c157250_g1,c157721_g1,c160060_g1,c160544_g1,c161…	BP	0.01194	0.0171839	335	1305	4
GO:0015977	carbon fixation	c139430_g1,c146940_g1,c180616_g1,c180616_g2,c186381_g1,c198928_g1,c208396_g1,c208396_g2,c249877_g1,c73497_g1	BP	0.01226	0.017526	10	21	4
GO:0006557	S-adenosylmethioninamine biosynthetic process	c190136_g2,c224117_g2,c224117_g8	BP	0.01255	0.0170808	3	3	6
GO:0015729	oxaloacetate transport	c225965_g1,c250820_g1,c90267_g1	BP	0.01255	0.0170808	3	3	10
GO:0015740	C4-dicarboxylate transport	c225965_g1,c250820_g1,c90267_g1	BP	0.01255	0.0170808	3	3	9
GO:0015743	malate transport	c225965_g1,c250820_g1,c90267_g1	BP	0.01255	0.0170808	3	3	10
GO:0016098	monoterpenoid metabolic process	c175926_g1,c200306_g1,c229271_g9	BP	0.01255	0.0170808	3	3	7
GO:0016099	monoterpenoid biosynthetic process	c175926_g1,c200306_g1,c229271_g9	BP	0.01255	0.0170808	3	3	7
GO:0019482	beta-alanine metabolic process	c210032_g1,c217180_g1,c221591_g5	BP	0.01255	0.0170808	3	3	5
GO:0019483	beta-alanine biosynthetic process	c210032_g1,c217180_g1,c221591_g5	BP	0.01255	0.0170808	3	3	6
GO:0042136	neurotransmitter biosynthetic process	c210032_g1,c217180_g1,c221591_g5	BP	0.01255	0.0170808	3	3	5
GO:0046499	S-adenosylmethioninamine metabolic process	c190136_g2,c224117_g2,c224117_g8	BP	0.01255	0.0170808	3	3	5
GO:0071423	malate transmembrane transport	c225965_g1,c250820_g1,c90267_g1	BP	0.01255	0.0170808	3	3	8
GO:0072387	flavin adenine dinucleotide metabolic process	c186154_g1,c228671_g1,c229947_g1	BP	0.01255	0.0170808	3	3	6
GO:1900992	(-)-secologanin metabolic process	c175926_g1,c200306_g1,c229271_g9	BP	0.01255	0.0170808	3	3	5
GO:1900994	(-)-secologanin biosynthetic process	c175926_g1,c200306_g1,c229271_g9	BP	0.01255	0.0170808	3	3	6
GO:1901575	organic substance catabolic process	c110032_g1,c110032_g2,c130963_g1,c137211_g1,c139238_g1,c140023_g1,c148406_g1,c150469_g1,c151047_g1,c151047_g2,c151047_g4,c153099_g1,c154301_g2,c154678_g1,c158643_g1,c160967_g1,c161865_g1,c162632_g2,c171188_g1,c176832_g1,c177014_g1,c177576_g1,c181261_g1,c181634_g1,c186285_g1,c187939_g1,c193411_g2,c195113_g1,c195963_g1,c196760_g1,c197168_g1,c197371_g1,c199516_g1,c199759_g1,c199794_g1,c199857_g1,c20…	BP	0.01302	0.0169101	88	306	4
GO:0009056	catabolic process	c110032_g1,c110032_g2,c130963_g1,c137211_g1,c139238_g1,c140023_g1,c146118_g2,c148406_g1,c148995_g2,c150469_g1,c151047_g1,c151047_g2,c151047_g4,c153099_g1,c154301_g2,c154678_g1,c157250_g1,c158643_g1,c160967_g1,c161865_g1,c162632_g2,c171188_g1,c176832_g1,c177014_g1,c177576_g1,c181261_g1,c181634_g1,c186285_g1,c187939_g1,c193411_g2,c195113_g1,c195963_g1,c196760_g1,c197168_g1,c197282_g1,c197371_g1,c19…	BP	0.01348	0.0174015	103	365	3
GO:1901264	carbohydrate derivative transport	c154595_g1,c187939_g1,c193467_g1,c205077_g1,c210413_g1,c223232_g1,c230095_g2	BP	0.01627	0.0208766	7	13	6
GO:0006739	NADP metabolic process	c148213_g1,c198928_g1,c199794_g1,c210398_g1,c230576_g2,c267178_g1,c27016_g1,c58352_g1	BP	0.01757	0.0220791	8	16	8
GO:0019253	reductive pentose-phosphate cycle	c139430_g1,c146940_g1,c186381_g1,c198928_g1,c208396_g1,c208396_g2,c249877_g1,c73497_g1	BP	0.01757	0.0220791	8	16	5
GO:0019685	photosynthesis, dark reaction	c139430_g1,c146940_g1,c186381_g1,c198928_g1,c208396_g1,c208396_g2,c249877_g1,c73497_g1	BP	0.01757	0.0220791	8	16	5
GO:0035999	tetrahydrofolate interconversion	c137195_g1,c144434_g1,c159481_g1,c162045_g1,c162045_g2,c205001_g1,c209171_g1,c211109_g1	BP	0.01757	0.0220791	8	16	5
GO:0051156	glucose 6-phosphate metabolic process	c148213_g1,c198928_g1,c199794_g1,c210398_g1,c230576_g2,c267178_g1,c27016_g1,c58352_g1	BP	0.01757	0.0220791	8	16	5
GO:0042254	ribosome biogenesis	c128775_g1,c130682_g1,c173705_g2,c184478_g1,c197031_g2,c204101_g1,c207406_g1,c208222_g1,c208266_g1,c212271_g1,c212973_g1,c213958_g1,c214432_g1,c216476_g1,c218048_g1,c219911_g2,c221161_g2,c225203_g7,c226346_g1,c228235_g6,c229559_g4,c230445_g3,c231072_g6,c232294_g1,c250546_g1	BP	0.01767	0.0217555	25	72	5
GO:0046364	monosaccharide biosynthetic process	c110032_g1,c110032_g2,c170920_g1,c184713_g1,c199794_g1,c206088_g1,c212216_g1,c212216_g2,c217361_g1,c217361_g2	BP	0.01789	0.0218998	10	22	5
GO:0006790	sulfur compound metabolic process	c137532_g1,c137532_g2,c153099_g1,c156181_g1,c172396_g1,c176328_g1,c177014_g1,c178792_g1,c182177_g1,c187166_g1,c187783_g1,c190136_g2,c204438_g1,c204873_g1,c205182_g1,c210325_g1,c210802_g1,c214135_g1,c214135_g2,c215328_g1,c215607_g1,c222662_g3,c222769_g1,c222769_g2,c224117_g2,c224117_g8,c231108_g4,c232311_g1,c250059_g1,c39751_g2,c90003_g1	BP	0.01946	0.0236856	31	94	4
GO:0022613	ribonucleoprotein complex biogenesis	c128775_g1,c130682_g1,c173705_g2,c184478_g1,c197031_g2,c204101_g1,c207406_g1,c208222_g1,c208266_g1,c212271_g1,c212973_g1,c213958_g1,c214432_g1,c216476_g1,c218048_g1,c219911_g2,c221161_g2,c225203_g7,c226346_g1,c228235_g6,c229559_g4,c230445_g3,c231072_g6,c232294_g1,c250546_g1	BP	0.0211	0.0255358	25	73	4
GO:0009225	nucleotide-sugar metabolic process	c131861_g1,c180412_g1,c190136_g1,c200690_g1,c205192_g1,c205703_g1,c206434_g1,c207059_g1,c208356_g2,c213620_g1,c213620_g2,c217836_g1,c226435_g2	BP	0.02121	0.0255239	13	32	5
GO:0009064	glutamine family amino acid metabolic process	c153259_g1,c197102_g1,c211330_g2,c214371_g7,c214371_g9,c214651_g1,c216074_g3,c216473_g2,c224199_g3,c224995_g1,c225965_g1,c228200_g2,c231911_g3,c232271_g1,c249904_g1,c250820_g1,c250931_g1,c90267_g1	BP	0.02285	0.027343	18	49	6
GO:0016125	sterol metabolic process	c130751_g1,c179522_g2,c184673_g1,c193591_g2,c204873_g1,c207630_g1,c207630_g2,c208315_g1,c215607_g1,c231377_g1,c285478_g1	BP	0.02399	0.0284672	11	26	5
GO:0016126	sterol biosynthetic process	c130751_g1,c179522_g2,c184673_g1,c193591_g2,c204873_g1,c207630_g1,c207630_g2,c208315_g1,c215607_g1,c231377_g1,c285478_g1	BP	0.02399	0.0284672	11	26	6
GO:0006635	fatty acid beta-oxidation	c187939_g1,c209581_g1,c213849_g1,c221650_g3,c221650_g4,c230856_g4	BP	0.02424	0.0284469	6	11	6
GO:0009062	fatty acid catabolic process	c187939_g1,c209581_g1,c213849_g1,c221650_g3,c221650_g4,c230856_g4	BP	0.02424	0.0284469	6	11	6
GO:0006094	gluconeogenesis	c110032_g1,c110032_g2,c184713_g1,c199794_g1,c206088_g1,c212216_g1,c212216_g2	BP	0.02611	0.0303075	7	14	7
GO:0019319	hexose biosynthetic process	c110032_g1,c110032_g2,c184713_g1,c199794_g1,c206088_g1,c212216_g1,c212216_g2	BP	0.02611	0.0303075	7	14	6
GO:0009965	leaf morphogenesis	c198327_g1,c204943_g2,c228671_g1,c229947_g1	BP	0.02904	0.0330776	4	6	5
GO:0019676	ammonia assimilation cycle	c224995_g1,c225965_g1,c250820_g1,c90267_g1	BP	0.02904	0.0330776	4	6	3
GO:0019740	nitrogen utilization	c224995_g1,c225965_g1,c250820_g1,c90267_g1	BP	0.02904	0.0330776	4	6	2
GO:0015711	organic anion transport	c154595_g1,c186793_g2,c187939_g1,c193467_g1,c200781_g2,c201655_g1,c205011_g1,c205077_g1,c206189_g1,c209612_g1,c210373_g1,c210413_g1,c213457_g2,c215057_g3,c215775_g1,c219076_g5,c223232_g1,c225630_g1,c225965_g1,c227016_g2,c230095_g2,c231444_g1,c250820_g1,c63521_g1,c90267_g1	BP	0.02951	0.0332573	25	75	6
GO:0006576	cellular biogenic amine metabolic process	c153099_g1,c176474_g1,c182497_g1,c190136_g2,c213930_g2,c220427_g2,c224117_g2,c224117_g8,c285144_g1,c43615_g1	BP	0.03443	0.0385978	10	24	6
GO:0006012	galactose metabolic process	c131861_g1,c181035_g1,c196911_g1,c206441_g3,c212088_g1	BP	0.03643	0.0405201	5	9	6
GO:0043174	nucleoside salvage	c162291_g1,c173745_g1,c198119_g3,c208395_g1,c225822_g3	BP	0.03643	0.0405201	5	9	5
GO:0042727	flavin-containing compound biosynthetic process	c108834_g2,c174467_g1,c186154_g1,c198703_g1,c207742_g1,c228647_g3	BP	0.03911	0.0431628	6	12	6
GO:0008652	cellular amino acid biosynthetic process	c102055_g1,c137532_g1,c137532_g2,c153259_g1,c158031_g1,c176474_g1,c178792_g1,c182497_g1,c187166_g1,c198415_g1,c201346_g1,c204438_g1,c209049_g1,c209518_g2,c210032_g1,c210802_g1,c211330_g2,c213930_g2,c214091_g1,c214135_g1,c214135_g2,c215328_g1,c215659_g1,c216074_g3,c216473_g2,c217180_g1,c217912_g1,c219568_g5,c221591_g5,c224199_g3,c224995_g1,c225949_g1,c228200_g2,c231911_g3,c232271_g1,c232311_g1,c23…	BP	0.0404	0.0443567	40	133	5
GO:0006166	purine ribonucleoside salvage	c162291_g1,c173745_g1,c208395_g1	BP	0.04145	0.0439246	3	4	6
GO:0006561	proline biosynthetic process	c216473_g2,c231911_g3,c232271_g1	BP	0.04145	0.0439246	3	4	6
GO:0006855	drug transmembrane transport	c210373_g1,c225965_g1,c90267_g1	BP	0.04145	0.0439246	3	4	6
GO:0015714	phosphoenolpyruvate transport	c154595_g1,c205077_g1,c210413_g1	BP	0.04145	0.0439246	3	4	7
GO:0016137	glycoside metabolic process	c175926_g1,c200306_g1,c229271_g9	BP	0.04145	0.0439246	3	4	6
GO:0016138	glycoside biosynthetic process	c175926_g1,c200306_g1,c229271_g9	BP	0.04145	0.0439246	3	4	7
GO:0034219	carbohydrate transmembrane transport	c154595_g1,c193467_g1,c210373_g1	BP	0.04145	0.0439246	3	4	6
GO:0042752	regulation of circadian rhythm	c218999_g1,c228671_g1,c229947_g1	BP	0.04145	0.0439246	3	4	3
GO:0042873	aldonate transmembrane transport	c154595_g1,c193467_g1,c210373_g1	BP	0.04145	0.0439246	3	4	7
GO:0044209	AMP salvage	c162291_g1,c173745_g1,c208395_g1	BP	0.04145	0.0439246	3	4	7
GO:0055129	L-proline biosynthetic process	c216473_g2,c231911_g3,c232271_g1	BP	0.04145	0.0439246	3	4	5
GO:1901804	beta-glucoside metabolic process	c175926_g1,c200306_g1,c229271_g9	BP	0.04145	0.0439246	3	4	7
GO:1901806	beta-glucoside biosynthetic process	c175926_g1,c200306_g1,c229271_g9	BP	0.04145	0.0439246	3	4	8
GO:0016054	organic acid catabolic process	c150469_g1,c153099_g1,c177014_g1,c187939_g1,c195963_g1,c209581_g1,c210299_g3,c213849_g1,c221650_g3,c221650_g4,c230856_g4,c267302_g1	BP	0.04938	0.050205	12	32	5
GO:0046395	carboxylic acid catabolic process	c150469_g1,c153099_g1,c177014_g1,c187939_g1,c195963_g1,c209581_g1,c210299_g3,c213849_g1,c221650_g3,c221650_g4,c230856_g4,c267302_g1	BP	0.04938	0.050205	12	32	6
GO:0055065	metal ion homeostasis	c130240_g1,c156305_g1,c187199_g1,c203983_g1,c204916_g1,c206693_g1,c213209_g1,c213209_g3,c213633_g1,c224674_g5,c228561_g1,c87475_g1	BP	0.04938	0.050205	12	32	8
GO:0055080	cation homeostasis	c130240_g1,c156305_g1,c187199_g1,c203983_g1,c204916_g1,c206693_g1,c213209_g1,c213209_g3,c213633_g1,c224674_g5,c228561_g1,c87475_g1	BP	0.04938	0.050205	12	32	7
GO:0030258	lipid modification	c187939_g1,c188049_g1,c209581_g1,c213849_g1,c220072_g3,c220342_g1,c221650_g3,c221650_g4,c230856_g4	BP	0.04942	0.0495363	9	22	5
GO:0097164	ammonium ion metabolic process	c190136_g2,c220427_g2,c221314_g1,c223924_g2,c224117_g2,c224117_g8,c232886_g1,c285144_g1,c48385_g1	BP	0.04942	0.0495363	9	22	4
GO:0004298	threonine-type endopeptidase activity	c144266_g1,c177087_g1,c186467_g1,c187091_g1,c195598_g1,c203335_g1,c210127_g1,c213487_g1,c214254_g1,c218693_g1,c223043_g2,c225806_g2,c229565_g1,c267122_g1,c267394_g1,c320579_g1,c84163_g1,c84163_g2,c87543_g1	MF	1.3e-11	8.84e-10	19	20	7
GO:0070003	threonine-type peptidase activity	c144266_g1,c177087_g1,c186467_g1,c187091_g1,c195598_g1,c203335_g1,c210127_g1,c213487_g1,c214254_g1,c218693_g1,c223043_g2,c225806_g2,c229565_g1,c267122_g1,c267394_g1,c320579_g1,c84163_g1,c84163_g2,c87543_g1	MF	1.3e-11	8.84e-10	19	20	6
GO:0008238	exopeptidase activity	c108871_g1,c176172_g2,c184669_g1,c187783_g1,c194503_g1,c197684_g1,c199799_g1,c206019_g1,c209590_g1,c213131_g1,c213158_g6,c213244_g1,c217066_g4,c219673_g6,c221498_g1,c222769_g1,c222769_g2,c223423_g1,c224794_g4,c227814_g3,c230469_g3,c231543_g1,c231543_g2,c231701_g1,c231701_g2,c87490_g1,c90029_g1,c90029_g2	MF	7.1e-06	0.0002414	28	55	6
GO:0001882	nucleoside binding	c109154_g1,c109515_g1,c132005_g1,c132271_g1,c137270_g1,c143883_g1,c144170_g1,c148445_g1,c153663_g1,c157721_g1,c161062_g1,c161176_g1,c162657_g1,c165956_g1,c171330_g2,c171330_g3,c174423_g1,c176470_g3,c179733_g1,c185996_g1,c189463_g1,c190147_g1,c190619_g1,c194506_g1,c194784_g1,c197217_g1,c197511_g1,c197595_g1,c197650_g1,c198069_g1,c198119_g3,c199521_g1,c200690_g1,c200758_g1,c203172_g1,c203916_g1,c20…	MF	4.4e-05	0.000748	68	189	4
GO:0001883	purine nucleoside binding	c109154_g1,c109515_g1,c132005_g1,c132271_g1,c137270_g1,c143883_g1,c144170_g1,c148445_g1,c153663_g1,c157721_g1,c161062_g1,c161176_g1,c162657_g1,c165956_g1,c171330_g2,c171330_g3,c174423_g1,c176470_g3,c179733_g1,c185996_g1,c189463_g1,c190147_g1,c190619_g1,c194506_g1,c194784_g1,c197217_g1,c197511_g1,c197595_g1,c197650_g1,c198069_g1,c198119_g3,c199521_g1,c200690_g1,c200758_g1,c203172_g1,c203916_g1,c20…	MF	4.4e-05	0.000748	68	189	5
GO:0005525	GTP binding	c109154_g1,c109515_g1,c132005_g1,c132271_g1,c137270_g1,c143883_g1,c144170_g1,c148445_g1,c153663_g1,c157721_g1,c161062_g1,c161176_g1,c162657_g1,c165956_g1,c171330_g2,c171330_g3,c174423_g1,c176470_g3,c179733_g1,c185996_g1,c189463_g1,c190147_g1,c190619_g1,c194506_g1,c194784_g1,c197217_g1,c197511_g1,c197595_g1,c197650_g1,c198069_g1,c198119_g3,c199521_g1,c200690_g1,c200758_g1,c203172_g1,c203916_g1,c20…	MF	4.4e-05	0.000748	68	189	6
GO:0032549	ribonucleoside binding	c109154_g1,c109515_g1,c132005_g1,c132271_g1,c137270_g1,c143883_g1,c144170_g1,c148445_g1,c153663_g1,c157721_g1,c161062_g1,c161176_g1,c162657_g1,c165956_g1,c171330_g2,c171330_g3,c174423_g1,c176470_g3,c179733_g1,c185996_g1,c189463_g1,c190147_g1,c190619_g1,c194506_g1,c194784_g1,c197217_g1,c197511_g1,c197595_g1,c197650_g1,c198069_g1,c198119_g3,c199521_g1,c200690_g1,c200758_g1,c203172_g1,c203916_g1,c20…	MF	4.4e-05	0.000748	68	189	5
GO:0032550	purine ribonucleoside binding	c109154_g1,c109515_g1,c132005_g1,c132271_g1,c137270_g1,c143883_g1,c144170_g1,c148445_g1,c153663_g1,c157721_g1,c161062_g1,c161176_g1,c162657_g1,c165956_g1,c171330_g2,c171330_g3,c174423_g1,c176470_g3,c179733_g1,c185996_g1,c189463_g1,c190147_g1,c190619_g1,c194506_g1,c194784_g1,c197217_g1,c197511_g1,c197595_g1,c197650_g1,c198069_g1,c198119_g3,c199521_g1,c200690_g1,c200758_g1,c203172_g1,c203916_g1,c20…	MF	4.4e-05	0.000748	68	189	6
GO:0016830	carbon-carbon lyase activity	c139430_g1,c161048_g1,c169474_g1,c176474_g1,c180412_g1,c180616_g1,c180616_g2,c184713_g1,c190136_g2,c196386_g1,c197145_g1,c203633_g1,c204873_g1,c206088_g1,c208356_g2,c209518_g2,c212216_g1,c212216_g2,c213620_g1,c213620_g2,c214921_g1,c215850_g2,c217836_g1,c218761_g1,c220427_g2,c223768_g3,c224117_g2,c224117_g8,c226414_g1,c230822_g3,c285112_g1,c43615_g1	MF	7.7e-05	0.000872667	32	73	4
GO:0016831	carboxy-lyase activity	c139430_g1,c161048_g1,c169474_g1,c180412_g1,c180616_g1,c180616_g2,c184713_g1,c190136_g2,c197145_g1,c204873_g1,c208356_g2,c209518_g2,c213620_g1,c213620_g2,c214921_g1,c215850_g2,c217836_g1,c220427_g2,c223768_g3,c224117_g2,c224117_g8,c226414_g1,c285112_g1	MF	0.00015	0.00153	23	48	5
GO:0004739	pyruvate dehydrogenase (acetyl-transferring) activity	c139238_g1,c199516_g1,c204369_g2,c221451_g4,c226869_g1,c320611_g1	MF	0.00016	0.00148364	6	6	6
GO:0070011	peptidase activity, acting on L-amino acid peptides	c108871_g1,c137208_g1,c144266_g1,c149557_g1,c156247_g1,c169578_g1,c169674_g1,c176154_g3,c176172_g2,c177087_g1,c184669_g1,c184727_g1,c186467_g1,c187091_g1,c187783_g1,c190578_g1,c190594_g1,c190607_g1,c192811_g1,c194396_g2,c194503_g1,c195598_g1,c195685_g1,c197684_g1,c199102_g1,c199404_g1,c199573_g1,c199799_g1,c199822_g1,c199822_g2,c200094_g1,c201825_g1,c203335_g1,c204933_g1,c205298_g1,c205586_g1,c20…	MF	0.00018	0.00153	106	334	5
GO:0019001	guanyl nucleotide binding	c109154_g1,c109515_g1,c132005_g1,c132271_g1,c137270_g1,c143883_g1,c144170_g1,c148445_g1,c153663_g1,c157721_g1,c161062_g1,c161176_g1,c162657_g1,c165956_g1,c171330_g2,c171330_g3,c174423_g1,c176470_g3,c179733_g1,c185996_g1,c189463_g1,c190147_g1,c190619_g1,c194506_g1,c194784_g1,c197217_g1,c197511_g1,c197595_g1,c197650_g1,c198069_g1,c198119_g3,c199521_g1,c200690_g1,c200758_g1,c203172_g1,c203916_g1,c20…	MF	0.0002	0.00151111	69	201	6
GO:0032561	guanyl ribonucleotide binding	c109154_g1,c109515_g1,c132005_g1,c132271_g1,c137270_g1,c143883_g1,c144170_g1,c148445_g1,c153663_g1,c157721_g1,c161062_g1,c161176_g1,c162657_g1,c165956_g1,c171330_g2,c171330_g3,c174423_g1,c176470_g3,c179733_g1,c185996_g1,c189463_g1,c190147_g1,c190619_g1,c194506_g1,c194784_g1,c197217_g1,c197511_g1,c197595_g1,c197650_g1,c198069_g1,c198119_g3,c199521_g1,c200690_g1,c200758_g1,c203172_g1,c203916_g1,c20…	MF	0.0002	0.00151111	69	201	6
GO:0019201	nucleotide kinase activity	c148454_g1,c156256_g1,c176951_g1,c196904_g1,c199838_g2,c214501_g6,c216907_g4,c232269_g1,c303895_g1	MF	0.00022	0.001496	9	12	7
GO:0019205	nucleobase-containing compound kinase activity	c148454_g1,c156256_g1,c176951_g1,c190282_g2,c196904_g1,c197267_g1,c198119_g3,c199838_g2,c208395_g1,c214501_g6,c216907_g4,c218048_g1,c225822_g3,c232269_g1,c303895_g1	MF	0.00029	0.00184875	15	27	6
GO:0019843	rRNA binding	c111203_g1,c137688_g1,c138483_g1,c148169_g1,c154384_g1,c173689_g1,c174440_g1,c201951_g1,c202447_g1,c21368_g1,c214432_g1,c218301_g5,c222989_g12,c227172_g4,c232888_g1,c2757_g1,c320499_g1,c325007_g1,c43546_g1,c72337_g1,c73164_g1,c76792_g1,c88305_g1	MF	0.00033	0.00198	23	50	6
GO:0008514	organic anion transmembrane transporter activity	c153217_g1,c154595_g1,c187939_g1,c193467_g1,c205077_g1,c210373_g1,c210413_g1,c210647_g2,c215057_g3,c223232_g1,c225965_g1,c230095_g2,c250820_g1,c90267_g1	MF	0.0007	0.00375789	14	26	6
GO:0015288	porin activity	c161167_g1,c175946_g1,c190460_g1,c194204_g1,c213433_g2,c267131_g1,c39821_g1,c73170_g1	MF	0.0007	0.00375789	8	11	7
GO:0022829	wide pore channel activity	c161167_g1,c175946_g1,c190460_g1,c194204_g1,c213433_g2,c267131_g1,c39821_g1,c73170_g1	MF	0.0007	0.00375789	8	11	6
GO:0004017	adenylate kinase activity	c148454_g1,c156256_g1,c196904_g1,c199838_g2,c232269_g1,c303895_g1	MF	0.00089	0.00422233	6	7	6
GO:0004738	pyruvate dehydrogenase activity	c139238_g1,c199516_g1,c204369_g2,c221451_g4,c226869_g1,c320611_g1	MF	0.00089	0.00422233	6	7	5
GO:0016614	oxidoreductase activity, acting on CH-OH group of donors	c126221_g1,c130963_g1,c149524_g1,c155188_g1,c183933_g1,c185968_g1,c190716_g1,c196432_g1,c197597_g1,c199650_g1,c204099_g1,c204100_g1,c205192_g1,c205703_g1,c208315_g1,c208535_g1,c208697_g1,c209049_g1,c213599_g2,c214176_g1,c214176_g3,c214554_g2,c214862_g1,c215042_g1,c216392_g2,c218709_g1,c219304_g2,c221650_g3,c221650_g4,c223039_g1,c225288_g1,c225949_g1,c226028_g1,c226961_g4,c230576_g2,c231820_g3,c26…	MF	0.00128	0.00567652	42	117	4
GO:0008233	peptidase activity	c108871_g1,c137208_g1,c144266_g1,c149557_g1,c154790_g1,c156247_g1,c157492_g1,c169578_g1,c169674_g1,c176154_g3,c176172_g2,c177087_g1,c177356_g1,c184669_g1,c184727_g1,c186467_g1,c187091_g1,c187783_g1,c190578_g1,c190594_g1,c190607_g1,c192811_g1,c194396_g2,c194503_g1,c195598_g1,c195685_g1,c197684_g1,c199102_g1,c199404_g1,c199573_g1,c199799_g1,c199822_g1,c199822_g2,c200094_g1,c201825_g1,c203335_g1,c20…	MF	0.00131	0.0055675	111	370	4
GO:0008483	transaminase activity	c150469_g1,c153099_g1,c158031_g1,c190236_g1,c197102_g1,c198178_g1,c201346_g1,c203633_g1,c214371_g7,c215659_g1,c222367_g7,c231108_g4,c232271_g1,c232320_g1,c250931_g1,c267302_g1	MF	0.00132	0.00528	16	33	5
GO:0016769	transferase activity, transferring nitrogenous groups	c150469_g1,c153099_g1,c158031_g1,c190236_g1,c197102_g1,c198178_g1,c201346_g1,c203633_g1,c214371_g7,c215659_g1,c222367_g7,c231108_g4,c232271_g1,c232320_g1,c250931_g1,c267302_g1	MF	0.00132	0.00528	16	33	4
GO:0016829	lyase activity	c116947_g1,c139430_g1,c154738_g1,c158643_g1,c161048_g1,c169474_g1,c169694_g1,c171322_g1,c176474_g1,c176856_g1,c180412_g1,c180616_g1,c180616_g2,c184713_g1,c187166_g1,c190136_g1,c190136_g2,c191448_g1,c193411_g2,c196386_g1,c197145_g1,c197168_g1,c198415_g1,c203633_g1,c204873_g1,c205182_g1,c205205_g1,c206088_g1,c207990_g1,c207990_g2,c208356_g2,c209518_g2,c210802_g1,c211032_g1,c211291_g1,c212216_g1,c21…	MF	0.00176	0.00664889	67	208	3
GO:0016616	oxidoreductase activity, acting on the CH-OH group of donors, NAD or NADP as acceptor	c126221_g1,c149524_g1,c155188_g1,c183933_g1,c185968_g1,c190716_g1,c196432_g1,c197597_g1,c199650_g1,c204099_g1,c204100_g1,c205192_g1,c205703_g1,c208315_g1,c208535_g1,c208697_g1,c209049_g1,c213599_g2,c214176_g1,c214176_g3,c214554_g2,c214862_g1,c215042_g1,c216392_g2,c218709_g1,c221650_g3,c221650_g4,c223039_g1,c225288_g1,c225949_g1,c226961_g4,c230576_g2,c231820_g3,c267178_g1,c27016_g1,c320885_g1,c398…	MF	0.00181	0.00659357	38	105	5
GO:0016776	phosphotransferase activity, phosphate group as acceptor	c148454_g1,c156256_g1,c176951_g1,c190282_g2,c196904_g1,c197267_g1,c199838_g2,c212814_g5,c216907_g4,c232269_g1,c303895_g1	MF	0.00212	0.00745655	11	20	5
GO:0016624	oxidoreductase activity, acting on the aldehyde or oxo group of donors, disulfide as acceptor	c139238_g1,c199516_g1,c204369_g2,c221451_g4,c226869_g1,c320611_g1	MF	0.00284	0.00934452	6	8	5
GO:0004742	dihydrolipoyllysine-residue acetyltransferase activity	c140023_g1,c199759_g1,c228355_g2,c230462_g1	MF	0.00293	0.00879	4	4	4
GO:0015301	anion:anion antiporter activity	c205077_g1,c210413_g1,c210582_g2,c221253_g2	MF	0.00293	0.00879	4	4	6
GO:0016418	S-acetyltransferase activity	c140023_g1,c199759_g1,c228355_g2,c230462_g1	MF	0.00293	0.00879	4	4	7
GO:0030523	dihydrolipoamide S-acyltransferase activity	c140023_g1,c199759_g1,c228355_g2,c230462_g1	MF	0.00293	0.00879	4	4	7
GO:0099516	ion antiporter activity	c205077_g1,c210413_g1,c210582_g2,c221253_g2	MF	0.00293	0.00879	4	4	5
GO:0033841	6G-fructosyltransferase activity	c205910_g1,c209237_g1,c217491_g1,c229949_g1,c42423_g1	MF	0.00329	0.0089488	5	6	7
GO:0050738	fructosyltransferase activity	c205910_g1,c209237_g1,c217491_g1,c229949_g1,c42423_g1	MF	0.00329	0.0089488	5	6	6
GO:0004180	carboxypeptidase activity	c184669_g1,c197684_g1,c206019_g1,c213131_g1,c213158_g6,c217066_g4,c219673_g6,c221498_g1,c224794_g4,c227814_g3,c230469_g3,c231543_g1,c231543_g2	MF	0.004	0.0104615	13	27	7
GO:0016837	carbon-oxygen lyase activity, acting on polysaccharides	c193411_g2,c205205_g1,c207990_g1,c207990_g2,c211032_g1,c215382_g1,c215382_g2	MF	0.00492	0.0123911	7	11	5
GO:0030570	pectate lyase activity	c193411_g2,c205205_g1,c207990_g1,c207990_g2,c211032_g1,c215382_g1,c215382_g2	MF	0.00492	0.0123911	7	11	6
GO:0005342	organic acid transmembrane transporter activity	c153217_g1,c154595_g1,c193467_g1,c205077_g1,c210373_g1,c210413_g1,c215057_g3,c225965_g1,c250820_g1,c90267_g1	MF	0.00514	0.012336	10	19	4
GO:0046943	carboxylic acid transmembrane transporter activity	c153217_g1,c154595_g1,c193467_g1,c205077_g1,c210373_g1,c210413_g1,c215057_g3,c225965_g1,c250820_g1,c90267_g1	MF	0.00514	0.012336	10	19	5
GO:0016651	oxidoreductase activity, acting on NAD(P)H	c136974_g1,c138498_g1,c153995_g1,c161071_g1,c180600_g1,c187337_g1,c190396_g1,c199745_g1,c203338_g1,c205332_g1,c206647_g1,c207677_g1,c219812_g1,c222162_g2,c223494_g1,c229854_g2,c270998_g1,c285121_g1	MF	0.00681	0.0157868	18	44	4
GO:0004177	aminopeptidase activity	c108871_g1,c176172_g2,c199799_g1,c209590_g1,c213244_g1,c231701_g1,c231701_g2,c87490_g1,c90029_g1,c90029_g2	MF	0.00817	0.0185187	10	20	7
GO:0016741	transferase activity, transferring one-carbon groups	c132166_g1,c137472_g1,c137532_g1,c137532_g2,c14434_g1,c158134_g1,c159481_g1,c162045_g1,c162045_g2,c162571_g1,c169198_g1,c169269_g2,c170483_g1,c184478_g1,c190522_g1,c190522_g2,c190522_g3,c190684_g1,c193480_g1,c194336_g1,c195586_g1,c198178_g1,c199812_g1,c203795_g1,c204415_g1,c205001_g1,c207630_g1,c207630_g2,c207896_g1,c207896_g2,c208266_g1,c209171_g1,c209222_g1,c212753_g1,c213642_g1,c213807_g1,c213…	MF	0.00896	0.0198678	56	180	4
GO:0008028	monocarboxylic acid transmembrane transporter activity	c154595_g1,c193467_g1,c205077_g1,c210373_g1,c210413_g1	MF	0.00931	0.0191842	5	7	6
GO:0008793	aromatic-amino-acid:2-oxoglutarate aminotransferase activity	c153099_g1,c158031_g1,c197102_g1,c215659_g1,c250931_g1	MF	0.00931	0.0191842	5	7	6
GO:0015605	organophosphate ester transmembrane transporter activity	c154595_g1,c187939_g1,c193467_g1,c205077_g1,c210413_g1	MF	0.00931	0.0191842	5	7	4
GO:0048040	UDP-glucuronate decarboxylase activity	c180412_g1,c208356_g2,c213620_g1,c213620_g2,c217836_g1	MF	0.00931	0.0191842	5	7	6
GO:0070546	L-phenylalanine aminotransferase activity	c153099_g1,c158031_g1,c197102_g1,c215659_g1,c250931_g1	MF	0.00931	0.0191842	5	7	6
GO:0080130	L-phenylalanine:2-oxoglutarate aminotransferase activity	c153099_g1,c158031_g1,c197102_g1,c215659_g1,c250931_g1	MF	0.00931	0.0191842	5	7	7
GO:0008509	anion transmembrane transporter activity	c153217_g1,c154595_g1,c161167_g1,c187939_g1,c193467_g1,c205077_g1,c210373_g1,c210413_g1,c210582_g2,c210647_g2,c215057_g3,c221253_g2,c223232_g1,c225965_g1,c230095_g2,c250820_g1,c90267_g1	MF	0.00954	0.01836	17	42	5
GO:0015171	amino acid transmembrane transporter activity	c153217_g1,c215057_g3,c225965_g1,c90267_g1	MF	0.01192	0.0221062	4	5	6
GO:0016157	sucrose synthase activity	c196400_g1,c196400_g3,c206084_g1,c210438_g1	MF	0.01192	0.0221062	4	5	7
GO:0071917	triose-phosphate transmembrane transporter activity	c154595_g1,c193467_g1,c205077_g1,c210413_g1	MF	0.01192	0.0221062	4	5	4
GO:0016667	oxidoreductase activity, acting on a sulfur group of donors	c160340_g1,c187337_g1,c190156_g1,c195204_g1,c196881_g1,c203338_g1,c204308_g1,c205332_g1,c207677_g1,c223494_g1,c43359_g1	MF	0.01241	0.0222074	11	24	4
GO:0004014	adenosylmethionine decarboxylase activity	c190136_g2,c224117_g2,c224117_g8	MF	0.0126	0.0210689	3	3	6
GO:0015131	oxaloacetate transmembrane transporter activity	c225965_g1,c250820_g1,c90267_g1	MF	0.0126	0.0210689	3	3	8
GO:0015140	malate transmembrane transporter activity	c225965_g1,c250820_g1,c90267_g1	MF	0.0126	0.0210689	3	3	8
GO:0015179	L-amino acid transmembrane transporter activity	c153217_g1,c225965_g1,c90267_g1	MF	0.0126	0.0210689	3	3	7
GO:0015556	C4-dicarboxylate transmembrane transporter activity	c225965_g1,c250820_g1,c90267_g1	MF	0.0126	0.0210689	3	3	7
GO:0016801	hydrolase activity, acting on ether bonds	c210559_g1,c225926_g5,c225926_g6	MF	0.0126	0.0210689	3	3	4
GO:0102970	7-deoxyloganetic acid glucosyltransferase activity	c175926_g1,c200306_g1,c229271_g9	MF	0.0126	0.0210689	3	3	6
GO:0016835	carbon-oxygen lyase activity	c154738_g1,c158643_g1,c171322_g1,c176856_g1,c190136_g1,c193411_g2,c197168_g1,c198415_g1,c205205_g1,c207990_g1,c207990_g2,c211032_g1,c214091_g1,c215382_g1,c215382_g2,c216568_g3,c217912_g1,c219568_g5,c221650_g3,c221650_g4,c223604_g2,c43615_g1	MF	0.01316	0.0206511	22	60	4
GO:0008168	methyltransferase activity	c132166_g1,c137472_g1,c137532_g1,c137532_g2,c14434_g1,c158134_g1,c162571_g1,c169198_g1,c169269_g2,c170483_g1,c184478_g1,c190522_g1,c190522_g2,c190522_g3,c190684_g1,c193480_g1,c194336_g1,c195586_g1,c198178_g1,c199812_g1,c203795_g1,c204415_g1,c207630_g1,c207630_g2,c207896_g1,c207896_g2,c208266_g1,c209222_g1,c212753_g1,c213642_g1,c213807_g1,c213917_g5,c214135_g1,c214135_g2,c215654_g2,c217155_g2,c218…	MF	0.01762	0.0272309	51	167	4
GO:0003993	acid phosphatase activity	c139429_g1,c197593_g2,c213753_g1,c213753_g2,c223157_g2,c224724_g3,c57316_g1,c6200_g1	MF	0.01771	0.0269615	8	16	7
GO:0015144	carbohydrate transmembrane transporter activity	c146605_g1,c154595_g1,c190442_g1,c190498_g1,c193467_g1,c204352_g2,c210373_g1,c214036_g2,c224817_g3	MF	0.01817	0.027255	9	19	4
GO:0008242	omega peptidase activity	c187783_g1,c194503_g1,c222769_g1,c222769_g2,c223423_g1	MF	0.02009	0.0296983	5	8	7
GO:0016209	antioxidant activity	c131842_g1,c146118_g2,c148995_g2,c171525_g1,c183497_g1,c187337_g1,c190511_g1,c197282_g1,c197593_g2,c199036_g1,c203338_g1,c205332_g1,c206576_g1,c207677_g1,c208222_g2,c218993_g2,c222871_g8,c226142_g2,c249943_g1,c249955_g1,c267132_g1,c43348_g1,c57316_g1	MF	0.02168	0.0315909	23	66	2
GO:0016491	oxidoreductase activity	c102274_g1,c108880_g1,c126221_g1,c130388_g1,c130963_g1,c131317_g1,c131842_g1,c136974_g1,c137195_g1,c137211_g1,c138498_g1,c139238_g1,c139430_g1,c144434_g1,c144571_g1,c146118_g2,c148313_g1,c148834_g1,c148995_g2,c149524_g1,c153995_g1,c155188_g1,c160340_g1,c161071_g1,c162455_g1,c162704_g1,c162781_g1,c169632_g1,c170920_g1,c171525_g1,c174815_g1,c178604_g1,c180600_g1,c181035_g1,c181320_g1,c183497_g1,c18…	MF	0.02413	0.0346656	202	771	3
GO:1901505	carbohydrate derivative transmembrane transporter activity	c154595_g1,c187939_g1,c193467_g1,c204352_g2,c210647_g2,c223232_g1,c230095_g2	MF	0.0263	0.0372583	7	14	4
GO:0016861	intramolecular oxidoreductase activity, interconverting aldoses and ketoses	c110032_g1,c110032_g2,c148213_g1,c199794_g1,c200125_g1,c210398_g1,c213930_g2,c73497_g1	MF	0.02676	0.0373907	8	17	5
GO:0016860	intramolecular oxidoreductase activity	c110032_g1,c110032_g2,c148213_g1,c190722_g1,c193591_g2,c199794_g1,c200125_g1,c210398_g1,c213930_g2,c221650_g3,c221650_g4,c225626_g1,c73497_g1	MF	0.02805	0.0386635	13	33	4
GO:0003871	5-methyltetrahydropteroyltriglutamate-homocysteine S-methyltransferase activity	c137532_g1,c137532_g2,c214135_g1,c214135_g2	MF	0.02918	0.0389067	4	6	6
GO:0004448	isocitrate dehydrogenase activity	c149524_g1,c208697_g1,c213599_g2,c39850_g1	MF	0.02918	0.0389067	4	6	6
GO:0016635	oxidoreductase activity, acting on the CH-CH group of donors, quinone or related compound as acceptor	c148313_g1,c174815_g1,c211423_g1,c217065_g1	MF	0.02918	0.0389067	4	6	5
GO:0042085	5-methyltetrahydropteroyltri-L-glutamate-dependent methyltransferase activity	c137532_g1,c137532_g2,c214135_g1,c214135_g2	MF	0.02918	0.0389067	4	6	5
GO:0016879	ligase activity, forming carbon-nitrogen bonds	c149226_g1,c153259_g1,c176328_g1,c198069_g1,c210130_g2,c211109_g1,c216074_g3,c223124_g1,c224199_g3,c224217_g1,c225676_g1,c229790_g3,c231108_g4,c250059_g1	MF	0.03302	0.0421005	14	37	4
GO:0019200	carbohydrate kinase activity	c10609_g1,c154301_g2,c176736_g1,c196911_g1,c207335_g1,c210609_g1,c211144_g1,c227698_g1,c231134_g6,c35949_g1	MF	0.03474	0.0434783	10	24	6
GO:0051537	2 iron, 2 sulfur cluster binding	c145785_g1,c180600_g1,c187857_g1,c197911_g1,c204191_g1,c211423_g1,c25404_g1,c320440_g1,c320566_g1,c72996_g1	MF	0.03474	0.0434783	10	24	5
GO:0003723	RNA binding	c111203_g1,c126211_g2,c128775_g1,c130682_g1,c130690_g1,c132252_g1,c136954_g1,c137567_g1,c137676_g1,c137688_g1,c138483_g1,c139407_g1,c148169_g1,c148596_g1,c153206_g1,c153663_g1,c154384_g1,c156548_g1,c161152_g1,c161203_g1,c161437_g2,c169473_g1,c169691_g1,c169703_g1,c169780_g1,c171330_g2,c171330_g3,c172756_g1,c173689_g1,c173705_g2,c173720_g1,c174440_g1,c174574_g1,c174833_g1,c176832_g1,c177576_g1,c17…	MF	0.03561	0.0437617	130	486	5
GO:0016832	aldehyde-lyase activity	c206088_g1,c212216_g1,c212216_g2,c230822_g3,c43615_g1	MF	0.03664	0.0444914	5	9	5
GO:0016742	hydroxymethyl-, formyl- and related transferase activity	c137472_g1,c159481_g1,c162045_g1,c162045_g2,c205001_g1,c209171_g1	MF	0.03936	0.047232	6	12	5
GO:0000104	succinate dehydrogenase activity	c148313_g1,c174815_g1,c211423_g1	MF	0.04161	0.0456368	3	4	5
GO:0003997	acyl-CoA oxidase activity	c197329_g1,c213849_g1,c214192_g1	MF	0.04161	0.0456368	3	4	6
GO:0004618	phosphoglycerate kinase activity	c146940_g1,c186381_g1,c211285_g1	MF	0.04161	0.0456368	3	4	6
GO:0004774	succinate-CoA ligase activity	c179932_g1,c186306_g3,c232236_g3	MF	0.04161	0.0456368	3	4	6
GO:0004775	succinate-CoA ligase (ADP-forming) activity	c179932_g1,c186306_g3,c232236_g3	MF	0.04161	0.0456368	3	4	7
GO:0008113	peptide-methionine (S)-S-oxide reductase activity	c160340_g1,c190156_g1,c43359_g1	MF	0.04161	0.0456368	3	4	6
GO:0008121	ubiquinol-cytochrome-c reductase activity	c204191_g1,c232288_g1,c320566_g1	MF	0.04161	0.0456368	3	4	5
GO:0008177	succinate dehydrogenase (ubiquinone) activity	c148313_g1,c174815_g1,c211423_g1	MF	0.04161	0.0456368	3	4	6
GO:0016656	monodehydroascorbate reductase (NADH) activity	c199745_g1,c206647_g1,c222162_g2	MF	0.04161	0.0456368	3	4	6
GO:0016681	oxidoreductase activity, acting on diphenols and related substances as donors, cytochrome as acceptor	c204191_g1,c232288_g1,c320566_g1	MF	0.04161	0.0456368	3	4	5
GO:0016688	L-ascorbate peroxidase activity	c148995_g2,c222871_g8,c249955_g1	MF	0.04161	0.0456368	3	4	4
GO:0036374	glutathione hydrolase activity	c187783_g1,c222769_g1,c222769_g2	MF	0.04161	0.0456368	3	4	8
GO:0042879	aldonate transmembrane transporter activity	c154595_g1,c193467_g1,c210373_g1	MF	0.04161	0.0456368	3	4	5
GO:0047631	ADP-ribose diphosphatase activity	c102353_g1,c208393_g1,c231522_g3	MF	0.04161	0.0456368	3	4	7
GO:0051920	peroxiredoxin activity	c208222_g2,c218993_g2,c267132_g1	MF	0.04161	0.0456368	3	4	3
GO:0015925	galactosidase activity	c1728_g1,c198912_g1,c210794_g7,c215302_g2,c217123_g2,c221627_g1,c228135_g1,c228135_g2,c228135_g3	MF	0.04982	0.0500654	9	22	6
GO:0016417	S-acyltransferase activity	c140023_g1,c177014_g1,c177572_g1,c199759_g1,c208944_g1,c215590_g1,c228355_g2,c230462_g1,c231090_g7	MF	0.04982	0.0500654	9	22	6
GO:0000502	proteasome complex	c131732_g1,c144266_g1,c149557_g1,c153248_g1,c159414_g1,c174478_g1,c177087_g1,c181299_g1,c186467_g1,c187091_g1,c187298_g1,c190059_g1,c195598_g1,c197140_g1,c197144_g1,c203335_g1,c204310_g1,c208298_g1,c210473_g1,c213487_g1,c21401_g1,c21401_g2,c21408_g1,c214254_g1,c216451_g1,c218693_g1,c221193_g1,c223043_g2,c224562_g1,c225806_g2,c228069_g1,c229565_g1,c229981_g1,c267122_g1,c267394_g1,c320579_g1,c84163…	CC	7e-18	2.59e-16	40	49	4
GO:1905368	peptidase complex	c131732_g1,c144266_g1,c149557_g1,c153248_g1,c159414_g1,c174478_g1,c177087_g1,c181299_g1,c186467_g1,c187091_g1,c187298_g1,c190059_g1,c195598_g1,c197140_g1,c197144_g1,c203335_g1,c204310_g1,c208298_g1,c210473_g1,c213487_g1,c21401_g1,c21401_g2,c21408_g1,c214254_g1,c216451_g1,c218693_g1,c221193_g1,c223043_g2,c224562_g1,c225806_g2,c228069_g1,c229565_g1,c229981_g1,c267122_g1,c267394_g1,c320579_g1,c84163…	CC	7e-18	2.59e-16	40	49	4
GO:1905369	endopeptidase complex	c131732_g1,c144266_g1,c149557_g1,c153248_g1,c159414_g1,c174478_g1,c177087_g1,c181299_g1,c186467_g1,c187091_g1,c187298_g1,c190059_g1,c195598_g1,c197140_g1,c197144_g1,c203335_g1,c204310_g1,c208298_g1,c210473_g1,c213487_g1,c21401_g1,c21401_g2,c21408_g1,c214254_g1,c216451_g1,c218693_g1,c221193_g1,c223043_g2,c224562_g1,c225806_g2,c228069_g1,c229565_g1,c229981_g1,c267122_g1,c267394_g1,c320579_g1,c84163…	CC	7e-18	2.59e-16	40	49	5
GO:0005737	cytoplasm	c101081_g1,c101263_g1,c101316_g1,c101482_g2,c101517_g1,c101655_g1,c101862_g1,c102055_g1,c102060_g1,c102274_g1,c103118_g1,c108772_g1,c108834_g2,c108853_g1,c108871_g1,c108880_g1,c109154_g1,c109655_g1,c109744_g1,c109806_g1,c110032_g1,c110032_g2,c111203_g1,c113977_g2,c114285_g1,c125359_g1,c126116_g1,c126211_g2,c126221_g1,c126236_g1,c128059_g1,c128775_g1,c130202_g1,c130240_g1,c130388_g1,c130963_g1,c13…	CC	1.4e-15	2.59e-14	1066	3980	4
GO:0005839	proteasome core complex	c144266_g1,c177087_g1,c186467_g1,c187091_g1,c195598_g1,c203335_g1,c213487_g1,c214254_g1,c218693_g1,c223043_g2,c225806_g2,c229565_g1,c267122_g1,c267394_g1,c320579_g1,c84163_g1,c84163_g2,c87543_g1	CC	5.5e-11	8.14e-10	18	19	3
GO:1902494	catalytic complex	c100419_g1,c131732_g1,c131890_g1,c140023_g1,c144266_g1,c149557_g1,c153248_g1,c159414_g1,c161750_g1,c174478_g1,c176474_g1,c177087_g1,c181299_g1,c186467_g1,c187091_g1,c187298_g1,c190059_g1,c195598_g1,c196431_g1,c197140_g1,c197144_g1,c203335_g1,c204101_g1,c204310_g1,c208298_g1,c210473_g1,c212673_g1,c213487_g1,c21401_g1,c21401_g2,c21408_g1,c214254_g1,c216451_g1,c218693_g1,c219911_g2,c221193_g1,c22171…	CC	7e-11	8.63333e-10	55	105	3
GO:0044429	mitochondrial part	c109806_g1,c130963_g1,c131273_g1,c131737_g1,c136974_g1,c137210_g1,c139238_g1,c140023_g1,c146942_g1,c148313_g1,c148365_g1,c153217_g1,c160544_g1,c161071_g1,c169198_g1,c169523_g1,c171975_g1,c174815_g1,c175946_g1,c176856_g1,c180332_g1,c180600_g1,c181371_g1,c183003_g1,c183815_g1,c183933_g1,c186651_g1,c187857_g1,c190460_g1,c190600_g1,c197137_g1,c197267_g1,c197336_g1,c198040_g1,c201069_g1,c201133_g1,c20…	CC	3e-08	3.17143e-07	88	223	4
GO:0019773	proteasome core complex, alpha-subunit complex	c144266_g1,c177087_g1,c186467_g1,c203335_g1,c223043_g2,c225806_g2,c229565_g1,c267394_g1,c320579_g1,c84163_g1,c84163_g2	CC	1.1e-07	1.0175e-06	11	11	3
GO:0005840	ribosome	c101263_g1,c101517_g1,c111203_g1,c114285_g1,c13108_g1,c137441_g1,c137599_g1,c137688_g1,c138483_g1,c144722_g1,c145464_g1,c146116_g1,c148169_g1,c154384_g1,c155419_g1,c1565_g1,c169682_g1,c170822_g1,c173689_g1,c174440_g1,c176898_g1,c177356_g1,c179943_g1,c181106_g1,c181278_g1,c190157_g1,c196850_g1,c199638_g1,c201951_g1,c202447_g1,c205777_g1,c205918_g1,c208150_g1,c210352_g1,c21368_g1,c216056_g1,c217645…	CC	1.6e-07	1.31556e-06	63	149	5
GO:0032991	protein-containing complex	c100419_g1,c101081_g1,c101263_g1,c101517_g1,c111203_g1,c114285_g1,c130719_g1,c13108_g1,c131732_g1,c131890_g1,c132401_g1,c137210_g1,c137441_g1,c137567_g1,c137599_g1,c137688_g1,c138483_g1,c140023_g1,c144266_g1,c144722_g1,c145464_g1,c146116_g1,c148169_g1,c148313_g1,c148596_g1,c149557_g1,c150204_g1,c153248_g1,c153663_g1,c154384_g1,c155419_g1,c1565_g1,c156548_g1,c159414_g1,c160544_g1,c161167_g1,c16175…	CC	4.2e-07	3.108e-06	184	576	2
GO:0005622	intracellular	c100419_g1,c100837_g1,c101081_g1,c101263_g1,c101316_g1,c101482_g2,c101517_g1,c101655_g1,c101862_g1,c102055_g1,c102060_g1,c102274_g1,c103118_g1,c108772_g1,c108834_g2,c108837_g1,c108853_g1,c108871_g1,c108880_g1,c109154_g1,c109655_g1,c109709_g1,c109744_g1,c109806_g1,c110032_g1,c110032_g2,c111203_g1,c113977_g2,c114285_g1,c116947_g1,c120314_g1,c125359_g1,c126116_g1,c126211_g2,c126221_g1,c126236_g1,c12…	CC	1.3e-06	8.36522e-06	1302	5280	3
GO:0044424	intracellular part	c100419_g1,c100837_g1,c101081_g1,c101263_g1,c101316_g1,c101482_g2,c101517_g1,c101655_g1,c101862_g1,c102055_g1,c102060_g1,c102274_g1,c103118_g1,c108772_g1,c108834_g2,c108837_g1,c108853_g1,c108871_g1,c108880_g1,c109154_g1,c109655_g1,c109709_g1,c109744_g1,c109806_g1,c110032_g1,c110032_g2,c111203_g1,c113977_g2,c114285_g1,c116947_g1,c120314_g1,c125359_g1,c126116_g1,c126211_g2,c126221_g1,c126236_g1,c12…	CC	1.3e-06	8.36522e-06	1302	5280	3
GO:0044444	cytoplasmic part	c101263_g1,c101316_g1,c101517_g1,c101655_g1,c101862_g1,c102055_g1,c102060_g1,c102274_g1,c103118_g1,c108772_g1,c108834_g2,c108853_g1,c108871_g1,c109154_g1,c109744_g1,c109806_g1,c110032_g1,c110032_g2,c111203_g1,c113977_g2,c114285_g1,c125359_g1,c126116_g1,c126221_g1,c126236_g1,c128059_g1,c130202_g1,c130240_g1,c130388_g1,c130963_g1,c13108_g1,c131273_g1,c131667_g1,c131737_g1,c132005_g1,c135399_g1,c136…	CC	1.6e-06	9.10769e-06	839	3247	4
GO:0019866	organelle inner membrane	c109806_g1,c130963_g1,c131273_g1,c131737_g1,c137210_g1,c146942_g1,c148313_g1,c148391_g1,c153217_g1,c160544_g1,c169198_g1,c169523_g1,c171975_g1,c174815_g1,c180332_g1,c180600_g1,c181371_g1,c183003_g1,c197137_g1,c198040_g1,c199584_g1,c201069_g1,c203611_g1,c203983_g1,c204191_g1,c204298_g1,c204850_g1,c205616_g1,c205642_g1,c205642_g2,c208164_g1,c209663_g3,c210204_g1,c210293_g1,c211423_g1,c213917_g5,c21…	CC	5.5e-06	2.90714e-05	68	179	4
GO:0005743	mitochondrial inner membrane	c109806_g1,c130963_g1,c131273_g1,c131737_g1,c137210_g1,c146942_g1,c148313_g1,c153217_g1,c160544_g1,c169198_g1,c169523_g1,c171975_g1,c174815_g1,c180332_g1,c180600_g1,c181371_g1,c183003_g1,c197137_g1,c198040_g1,c201069_g1,c203983_g1,c204191_g1,c204298_g1,c204850_g1,c205642_g1,c205642_g2,c208164_g1,c209663_g3,c210204_g1,c210293_g1,c211423_g1,c213917_g5,c21479_g1,c214921_g1,c214979_g6,c215735_g5,c215…	CC	5.9e-06	2.91067e-05	52	127	5
GO:0005740	mitochondrial envelope	c109806_g1,c130963_g1,c131273_g1,c131737_g1,c136974_g1,c137210_g1,c146942_g1,c148313_g1,c148365_g1,c153217_g1,c160544_g1,c161071_g1,c169198_g1,c169523_g1,c171975_g1,c174815_g1,c175946_g1,c176856_g1,c180332_g1,c180600_g1,c181371_g1,c183003_g1,c187857_g1,c190460_g1,c197137_g1,c197267_g1,c197336_g1,c198040_g1,c201069_g1,c201150_g1,c203983_g1,c204191_g1,c204298_g1,c204850_g1,c205642_g1,c205642_g2,c20…	CC	9.3e-06	4.30125e-05	67	178	5
GO:0031966	mitochondrial membrane	c109806_g1,c130963_g1,c131273_g1,c131737_g1,c136974_g1,c137210_g1,c146942_g1,c148313_g1,c153217_g1,c160544_g1,c169198_g1,c169523_g1,c171975_g1,c174815_g1,c175946_g1,c176856_g1,c180332_g1,c180600_g1,c181371_g1,c183003_g1,c190460_g1,c197137_g1,c197336_g1,c198040_g1,c201069_g1,c201150_g1,c203983_g1,c204191_g1,c204298_g1,c204850_g1,c205642_g1,c205642_g2,c208164_g1,c209663_g3,c210204_g1,c210293_g1,c21…	CC	4.5e-05	0.000195882	63	172	4
GO:0005739	mitochondrion	c109806_g1,c130963_g1,c131273_g1,c131737_g1,c136974_g1,c137208_g1,c137210_g1,c137472_g1,c139238_g1,c140023_g1,c146942_g1,c148313_g1,c148365_g1,c148454_g1,c153217_g1,c154738_g1,c160544_g1,c160972_g1,c161071_g1,c161087_g1,c161865_g1,c162045_g1,c162045_g2,c168417_g1,c16867_g1,c169198_g1,c169523_g1,c170631_g1,c171330_g2,c171330_g3,c171975_g1,c174440_g1,c174533_g1,c174815_g1,c175946_g1,c176856_g1,c176…	CC	9.2e-05	0.000378222	176	592	5
GO:0031090	organelle membrane	c101862_g1,c102060_g1,c108772_g1,c108853_g1,c109806_g1,c126116_g1,c128059_g1,c130202_g1,c130240_g1,c130963_g1,c131273_g1,c131667_g1,c131737_g1,c132005_g1,c136974_g1,c136980_g1,c137210_g1,c14434_g1,c144571_g1,c146942_g1,c148313_g1,c148391_g1,c148834_g1,c151654_g1,c152081_g1,c153217_g1,c154595_g1,c156305_g1,c157045_g1,c157250_g1,c158134_g1,c160060_g1,c160544_g1,c161167_g1,c162695_g1,c165956_g1,c167…	CC	0.00019	0.00074	282	1016	3
GO:0019774	proteasome core complex, beta-subunit complex	c187091_g1,c195598_g1,c213487_g1,c214254_g1,c218693_g1,c267122_g1,c87543_g1	CC	0.00023	0.000851	7	8	3
GO:0005759	mitochondrial matrix	c139238_g1,c140023_g1,c183815_g1,c183933_g1,c186651_g1,c190600_g1,c201133_g1,c204369_g2,c210299_g3,c219549_g1,c219549_g2,c219732_g1,c219812_g1,c221451_g4,c22343_g2,c225693_g3,c226142_g2,c226869_g1,c230462_g1,c232271_g1,c25404_g1,c39699_g1	CC	0.00047	0.00165619	22	48	5
GO:0046930	pore complex	c161167_g1,c175946_g1,c190460_g1,c194204_g1,c213433_g2,c267131_g1,c39821_g1,c73170_g1	CC	0.0007	0.00235455	8	11	4
GO:0044422	organelle part	c100419_g1,c101655_g1,c101862_g1,c102060_g1,c108772_g1,c108853_g1,c109806_g1,c110032_g1,c110032_g2,c113977_g2,c126116_g1,c126236_g1,c128059_g1,c128775_g1,c130202_g1,c130240_g1,c130388_g1,c130719_g1,c130963_g1,c131273_g1,c131667_g1,c131737_g1,c131890_g1,c132005_g1,c132401_g1,c135399_g1,c136965_g1,c136974_g1,c136980_g1,c137210_g1,c137270_g1,c137311_g1,c137567_g1,c138498_g1,c139238_g1,c139407_g1,c14…	CC	0.00074	0.00238087	558	2170	2
GO:0044446	intracellular organelle part	c100419_g1,c101655_g1,c101862_g1,c102060_g1,c108772_g1,c108853_g1,c109806_g1,c110032_g1,c110032_g2,c113977_g2,c126116_g1,c126236_g1,c128059_g1,c128775_g1,c130202_g1,c130240_g1,c130388_g1,c130719_g1,c130963_g1,c131273_g1,c131667_g1,c131737_g1,c131890_g1,c132005_g1,c132401_g1,c135399_g1,c136965_g1,c136974_g1,c136980_g1,c137210_g1,c137270_g1,c137311_g1,c137567_g1,c138498_g1,c139238_g1,c139407_g1,c14…	CC	0.00094	0.00289833	554	2158	3
GO:1990904	ribonucleoprotein complex	c101263_g1,c101517_g1,c111203_g1,c114285_g1,c13108_g1,c137441_g1,c137567_g1,c137599_g1,c137688_g1,c138483_g1,c144722_g1,c145464_g1,c146116_g1,c148169_g1,c148596_g1,c153663_g1,c154384_g1,c155419_g1,c1565_g1,c156548_g1,c169682_g1,c170822_g1,c173689_g1,c174440_g1,c176898_g1,c177356_g1,c179943_g1,c180474_g1,c180474_g2,c181106_g1,c181278_g1,c190157_g1,c195758_g1,c196760_g1,c196793_g1,c196850_g1,c19963…	CC	0.00268	0.0079328	78	252	3
GO:0031974	membrane-enclosed lumen	c100419_g1,c128775_g1,c131890_g1,c137567_g1,c139238_g1,c139407_g1,c140023_g1,c148365_g1,c154339_g1,c156548_g1,c161071_g1,c161437_g2,c161750_g1,c169780_g1,c169834_g1,c172511_g1,c173705_g2,c174453_g1,c179786_g1,c183815_g1,c183933_g1,c184478_g1,c186651_g1,c187857_g1,c190600_g1,c190770_g1,c193726_g1,c194668_g1,c195758_g1,c196431_g1,c196793_g1,c197031_g2,c197078_g1,c197267_g1,c197331_g1,c200746_g1,c20…	CC	0.00278	0.00761926	92	305	2
GO:0043233	organelle lumen	c100419_g1,c128775_g1,c131890_g1,c137567_g1,c139238_g1,c139407_g1,c140023_g1,c148365_g1,c154339_g1,c156548_g1,c161071_g1,c161437_g2,c161750_g1,c169780_g1,c169834_g1,c172511_g1,c173705_g2,c174453_g1,c179786_g1,c183815_g1,c183933_g1,c184478_g1,c186651_g1,c187857_g1,c190600_g1,c190770_g1,c193726_g1,c194668_g1,c195758_g1,c196431_g1,c196793_g1,c197031_g2,c197078_g1,c197267_g1,c197331_g1,c200746_g1,c20…	CC	0.00278	0.00761926	92	305	3
GO:0070013	intracellular organelle lumen	c100419_g1,c128775_g1,c131890_g1,c137567_g1,c139238_g1,c139407_g1,c140023_g1,c148365_g1,c154339_g1,c156548_g1,c161071_g1,c161437_g2,c161750_g1,c169780_g1,c169834_g1,c172511_g1,c173705_g2,c174453_g1,c179786_g1,c183815_g1,c183933_g1,c184478_g1,c186651_g1,c187857_g1,c190600_g1,c190770_g1,c193726_g1,c194668_g1,c195758_g1,c196431_g1,c196793_g1,c197031_g2,c197078_g1,c197267_g1,c197331_g1,c200746_g1,c20…	CC	0.00278	0.00761926	92	305	4
GO:0098805	whole membrane	c101862_g1,c108772_g1,c126116_g1,c131667_g1,c132005_g1,c136974_g1,c136980_g1,c151654_g1,c152081_g1,c156305_g1,c157045_g1,c157250_g1,c160060_g1,c161167_g1,c169625_g1,c169637_g1,c169640_g1,c173707_g2,c174434_g1,c174489_g1,c175921_g1,c175946_g1,c177332_g1,c177924_g3,c179404_g2,c180363_g1,c180810_g1,c180810_g2,c180960_g1,c182497_g1,c184535_g1,c185089_g1,c185996_g1,c187199_g1,c187783_g1,c187939_g1,c19…	CC	0.00287	0.00732345	104	351	3
GO:0031967	organelle envelope	c109806_g1,c126116_g1,c130240_g1,c130963_g1,c131273_g1,c131737_g1,c136974_g1,c136980_g1,c137210_g1,c146942_g1,c148313_g1,c148365_g1,c148391_g1,c148834_g1,c153217_g1,c154595_g1,c160544_g1,c161071_g1,c161167_g1,c169198_g1,c169523_g1,c171975_g1,c174612_g1,c174815_g1,c175946_g1,c176856_g1,c180332_g1,c180600_g1,c181320_g1,c181371_g1,c183003_g1,c187857_g1,c190460_g1,c192573_g1,c193467_g1,c194204_g1,c19…	CC	0.00303	0.00735148	129	448	4
GO:0031975	envelope	c109806_g1,c126116_g1,c130240_g1,c130963_g1,c131273_g1,c131737_g1,c136974_g1,c136980_g1,c137210_g1,c146942_g1,c148313_g1,c148365_g1,c148391_g1,c148834_g1,c153217_g1,c154595_g1,c160544_g1,c161071_g1,c161167_g1,c169198_g1,c169523_g1,c171975_g1,c174612_g1,c174815_g1,c175946_g1,c176856_g1,c180332_g1,c180600_g1,c181320_g1,c181371_g1,c183003_g1,c187857_g1,c190460_g1,c192573_g1,c193467_g1,c194204_g1,c19…	CC	0.00303	0.00735148	129	448	3
GO:0005623	cell	c100419_g1,c100806_g1,c100837_g1,c101081_g1,c101263_g1,c101316_g1,c101482_g2,c101517_g1,c101655_g1,c101862_g1,c102055_g1,c102060_g1,c102274_g1,c103118_g1,c108772_g1,c108834_g2,c108837_g1,c108853_g1,c108871_g1,c108880_g1,c109154_g1,c109515_g1,c109655_g1,c109709_g1,c109744_g1,c109806_g1,c110032_g1,c110032_g2,c111203_g1,c113977_g2,c114285_g1,c116947_g1,c120314_g1,c125359_g1,c126116_g1,c126127_g1,c12…	CC	0.0072	0.0163938	1444	6070	2
GO:0044464	cell part	c100419_g1,c100806_g1,c100837_g1,c101081_g1,c101263_g1,c101316_g1,c101482_g2,c101517_g1,c101655_g1,c101862_g1,c102055_g1,c102060_g1,c102274_g1,c103118_g1,c108772_g1,c108834_g2,c108837_g1,c108853_g1,c108871_g1,c108880_g1,c109154_g1,c109515_g1,c109655_g1,c109709_g1,c109744_g1,c109806_g1,c110032_g1,c110032_g2,c111203_g1,c113977_g2,c114285_g1,c116947_g1,c120314_g1,c125359_g1,c126116_g1,c126127_g1,c12…	CC	0.0072	0.0163938	1444	6070	2
GO:0070469	respiratory chain	c131273_g1,c131737_g1,c148313_g1,c148365_g1,c174815_g1,c180600_g1,c181371_g1,c190396_g1,c204191_g1,c211423_g1,c22343_g2,c225652_g2,c232288_g1,c285121_g1,c320566_g1,c6842_g1	CC	0.01013	0.0220476	16	39	3
GO:0005774	vacuolar membrane	c101862_g1,c131667_g1,c152081_g1,c157045_g1,c157250_g1,c160060_g1,c169637_g1,c169640_g1,c173707_g2,c174434_g1,c174489_g1,c177924_g3,c182497_g1,c185089_g1,c187199_g1,c187783_g1,c190035_g2,c196763_g1,c197596_g1,c199449_g1,c201026_g1,c201280_g1,c205910_g1,c209237_g1,c212350_g2,c212989_g1,c215057_g3,c21573_g2,c217325_g1,c217491_g1,c217574_g1,c217574_g2,c219999_g2,c221124_g1,c223792_g3,c224527_g1,c224…	CC	0.01059	0.0223903	47	148	4
GO:0000785	chromatin	c130719_g1,c132401_g1,c185057_g1,c197331_g1,c198838_g1,c202367_g1,c215725_g5,c216740_g1,c217919_g1,c222092_g2,c224695_g2,c226439_g3,c228235_g6,c88680_g1	CC	0.01128	0.0231867	14	33	5
GO:0031300	intrinsic component of organelle membrane	c161167_g1,c194204_g1,c210647_g2,c213433_g2	CC	0.01191	0.0235024	4	5	3
GO:0031301	integral component of organelle membrane	c161167_g1,c194204_g1,c210647_g2,c213433_g2	CC	0.01191	0.0235024	4	5	4
GO:0005783	endoplasmic reticulum	c101655_g1,c102060_g1,c109154_g1,c126236_g1,c130388_g1,c136965_g1,c137100_g1,c138498_g1,c144571_g1,c144698_g1,c151769_g1,c155188_g1,c157721_g1,c162455_g1,c169193_g2,c169467_g1,c169834_g1,c172100_g1,c172511_g1,c174080_g1,c174453_g1,c176963_g1,c177332_g1,c180629_g1,c180700_g1,c184673_g1,c184727_g1,c185357_g1,c187773_g1,c190185_g1,c190522_g1,c190522_g2,c190522_g3,c190594_g1,c190684_g1,c190770_g1,c19…	CC	0.01237	0.0234713	108	383	4
GO:0044437	vacuolar part	c101862_g1,c131667_g1,c152081_g1,c157045_g1,c157250_g1,c160060_g1,c169637_g1,c169640_g1,c173707_g2,c174434_g1,c174489_g1,c177924_g3,c182497_g1,c185089_g1,c187199_g1,c187783_g1,c190035_g2,c196763_g1,c197596_g1,c199449_g1,c201026_g1,c201280_g1,c205910_g1,c209237_g1,c212350_g2,c212989_g1,c215057_g3,c21573_g2,c217325_g1,c217491_g1,c217574_g1,c217574_g2,c218979_g1,c219999_g2,c221124_g1,c223792_g3,c224…	CC	0.01254	0.023199	48	153	4
GO:0009513	etioplast	c161167_g1,c213433_g2,c217152_g2	CC	0.01259	0.0216665	3	3	6
GO:0031354	intrinsic component of plastid outer membrane	c161167_g1,c194204_g1,c213433_g2	CC	0.01259	0.0216665	3	3	5
GO:0031355	integral component of plastid outer membrane	c161167_g1,c194204_g1,c213433_g2	CC	0.01259	0.0216665	3	3	6
GO:0031358	intrinsic component of chloroplast outer membrane	c161167_g1,c194204_g1,c213433_g2	CC	0.01259	0.0216665	3	3	6
GO:0031359	integral component of chloroplast outer membrane	c161167_g1,c194204_g1,c213433_g2	CC	0.01259	0.0216665	3	3	7
GO:0098588	bounding membrane of organelle	c101862_g1,c102060_g1,c108772_g1,c108853_g1,c126116_g1,c128059_g1,c130202_g1,c131667_g1,c132005_g1,c136974_g1,c136980_g1,c14434_g1,c151654_g1,c152081_g1,c156305_g1,c157045_g1,c157250_g1,c158134_g1,c160060_g1,c161167_g1,c165956_g1,c167071_g1,c169467_g1,c169625_g1,c169637_g1,c169640_g1,c170942_g1,c172100_g1,c173707_g2,c174434_g1,c174489_g1,c175921_g1,c175946_g1,c176963_g1,c177288_g1,c177332_g1,c177…	CC	0.01631	0.0262378	170	634	4
GO:0043226	organelle	c100419_g1,c100837_g1,c101081_g1,c101263_g1,c101316_g1,c101482_g2,c101517_g1,c101655_g1,c101862_g1,c102055_g1,c102060_g1,c102274_g1,c103118_g1,c108772_g1,c108834_g2,c108837_g1,c108853_g1,c108871_g1,c108880_g1,c109154_g1,c109709_g1,c109744_g1,c109806_g1,c110032_g1,c110032_g2,c111203_g1,c113977_g2,c114285_g1,c116947_g1,c120314_g1,c125359_g1,c126116_g1,c126211_g2,c126221_g1,c126236_g1,c128059_g1,c12…	CC	0.0183	0.0288128	1150	4789	2
GO:0044432	endoplasmic reticulum part	c101655_g1,c102060_g1,c126236_g1,c130388_g1,c136965_g1,c138498_g1,c144571_g1,c144698_g1,c151769_g1,c155188_g1,c162455_g1,c169193_g2,c169467_g1,c172100_g1,c172511_g1,c174453_g1,c176963_g1,c177332_g1,c180629_g1,c180700_g1,c184673_g1,c185357_g1,c187773_g1,c190522_g1,c190522_g2,c190522_g3,c190684_g1,c190770_g1,c193591_g2,c193726_g1,c194208_g2,c194778_g1,c196583_g1,c196583_g2,c197661_g1,c199100_g1,c19…	CC	0.01911	0.0294613	89	314	4
GO:0043229	intracellular organelle	c100419_g1,c100837_g1,c101081_g1,c101263_g1,c101316_g1,c101482_g2,c101517_g1,c101655_g1,c101862_g1,c102055_g1,c102060_g1,c102274_g1,c103118_g1,c108772_g1,c108834_g2,c108837_g1,c108853_g1,c108871_g1,c108880_g1,c109154_g1,c109709_g1,c109744_g1,c109806_g1,c110032_g1,c110032_g2,c111203_g1,c113977_g2,c114285_g1,c116947_g1,c120314_g1,c125359_g1,c126116_g1,c126211_g2,c126221_g1,c126236_g1,c128059_g1,c12…	CC	0.02215	0.033451	1148	4786	3
GO:0043228	non-membrane-bounded organelle	c101263_g1,c101517_g1,c111203_g1,c113977_g2,c114285_g1,c128775_g1,c130719_g1,c130965_g1,c13108_g1,c132401_g1,c135399_g1,c137270_g1,c137311_g1,c137441_g1,c137599_g1,c137688_g1,c138483_g1,c139407_g1,c143883_g1,c144222_g1,c144722_g1,c145464_g1,c146116_g1,c148169_g1,c148596_g1,c154339_g1,c154384_g1,c155419_g1,c1565_g1,c158999_g1,c169467_g1,c169682_g1,c169834_g1,c170822_g1,c173689_g1,c173705_g2,c17408…	CC	0.02357	0.0345382	161	604	3
GO:0043232	intracellular non-membrane-bounded organelle	c101263_g1,c101517_g1,c111203_g1,c113977_g2,c114285_g1,c128775_g1,c130719_g1,c130965_g1,c13108_g1,c132401_g1,c135399_g1,c137270_g1,c137311_g1,c137441_g1,c137599_g1,c137688_g1,c138483_g1,c139407_g1,c143883_g1,c144222_g1,c144722_g1,c145464_g1,c146116_g1,c148169_g1,c148596_g1,c154339_g1,c154384_g1,c155419_g1,c1565_g1,c158999_g1,c169467_g1,c169682_g1,c169834_g1,c170822_g1,c173689_g1,c173705_g2,c17408…	CC	0.02357	0.0345382	161	604	4
GO:0000786	nucleosome	c130719_g1,c132401_g1,c185057_g1,c198838_g1,c202367_g1,c215725_g5,c216740_g1,c217919_g1,c222092_g2,c224695_g2,c226439_g3	CC	0.02419	0.0340964	11	26	4
GO:0044815	DNA packaging complex	c130719_g1,c132401_g1,c185057_g1,c198838_g1,c202367_g1,c215725_g5,c216740_g1,c217919_g1,c222092_g2,c224695_g2,c226439_g3	CC	0.02419	0.0340964	11	26	3
GO:0000178	exosome (RNase complex)	c204101_g1,c219911_g2,c226346_g1,c250546_g1	CC	0.02915	0.0395798	4	6	4
GO:1905354	exoribonuclease complex	c204101_g1,c219911_g2,c226346_g1,c250546_g1	CC	0.02915	0.0395798	4	6	4
GO:0043231	intracellular membrane-bounded organelle	c100419_g1,c100837_g1,c101081_g1,c101316_g1,c101482_g2,c101655_g1,c101862_g1,c102055_g1,c102060_g1,c102274_g1,c103118_g1,c108772_g1,c108834_g2,c108837_g1,c108853_g1,c108871_g1,c108880_g1,c109154_g1,c109709_g1,c109744_g1,c109806_g1,c110032_g1,c110032_g2,c111203_g1,c113977_g2,c114285_g1,c116947_g1,c120314_g1,c126116_g1,c126211_g2,c126221_g1,c126236_g1,c128059_g1,c128775_g1,c130202_g1,c130240_g1,c13…	CC	0.03074	0.0406207	1056	4396	4
GO:0043227	membrane-bounded organelle	c100419_g1,c100837_g1,c101081_g1,c101316_g1,c101482_g2,c101655_g1,c101862_g1,c102055_g1,c102060_g1,c102274_g1,c103118_g1,c108772_g1,c108834_g2,c108837_g1,c108853_g1,c108871_g1,c108880_g1,c109154_g1,c109709_g1,c109744_g1,c109806_g1,c110032_g1,c110032_g2,c111203_g1,c113977_g2,c114285_g1,c116947_g1,c120314_g1,c125359_g1,c126116_g1,c126211_g2,c126221_g1,c126236_g1,c128059_g1,c128775_g1,c130202_g1,c13…	CC	0.03214	0.0417256	1078	4493	3
GO:0005778	peroxisomal membrane	c108772_g1,c175921_g1,c180363_g1,c187939_g1,c190584_g1,c199745_g1,c222295_g1,c226707_g1,c228179_g3,c232599_g1,c267532_g1	CC	0.03245	0.0410479	11	27	5
GO:0031903	microbody membrane	c108772_g1,c175921_g1,c180363_g1,c187939_g1,c190584_g1,c199745_g1,c222295_g1,c226707_g1,c228179_g3,c232599_g1,c267532_g1	CC	0.03245	0.0410479	11	27	4
GO:0016469	proton-transporting two-sector ATPase complex	c137210_g1,c150204_g1,c160544_g1,c169523_g1,c185622_g1,c198040_g1,c204298_g1	CC	0.03956	0.0483874	7	15	4
GO:0045259	proton-transporting ATP synthase complex	c137210_g1,c150204_g1,c160544_g1,c169523_g1,c185622_g1,c198040_g1,c204298_g1	CC	0.03956	0.0483874	7	15	4
GO:0005793	endoplasmic reticulum-Golgi intermediate compartment	c102060_g1,c165956_g1,c231692_g2	CC	0.04158	0.0480769	3	4	5
GO:0031350	intrinsic component of plastid membrane	c161167_g1,c194204_g1,c213433_g2	CC	0.04158	0.0480769	3	4	4
GO:0031351	integral component of plastid membrane	c161167_g1,c194204_g1,c213433_g2	CC	0.04158	0.0480769	3	4	5
GO:0032585	multivesicular body membrane	c156305_g1,c213209_g1,c213209_g3	CC	0.04158	0.0480769	3	4	6
GO:0033116	endoplasmic reticulum-Golgi intermediate compartment membrane	c102060_g1,c165956_g1,c231692_g2	CC	0.04158	0.0480769	3	4	5
GO:0005777	peroxisome	c108772_g1,c150469_g1,c169632_g1,c175921_g1,c180363_g1,c187939_g1,c190584_g1,c196877_g1,c197329_g1,c199745_g1,c204873_g1,c209179_g1,c209415_g1,c209581_g1,c213849_g1,c214192_g1,c218761_g1,c219063_g2,c219812_g1,c221519_g3,c221650_g3,c221650_g4,c222186_g6,c222295_g1,c224322_g1,c226707_g1,c228179_g3,c230856_g4,c232599_g1,c267532_g1,c87372_g1,c87405_g1	CC	0.04164	0.0456498	32	103	6
GO:0042579	microbody	c108772_g1,c150469_g1,c169632_g1,c175921_g1,c180363_g1,c187939_g1,c190584_g1,c196877_g1,c197329_g1,c199745_g1,c204873_g1,c209179_g1,c209415_g1,c209581_g1,c213849_g1,c214192_g1,c218761_g1,c219063_g2,c219812_g1,c221519_g3,c221650_g3,c221650_g4,c222186_g6,c222295_g1,c224322_g1,c226707_g1,c228179_g3,c230856_g4,c232599_g1,c267532_g1,c87372_g1,c87405_g1	CC	0.04164	0.0456498	32	103	5
GO:0031985	Golgi cisterna	c102060_g1,c130202_g1,c180412_g1,c194720_g1,c205992_g2,c217836_g1,c225856_g2,c303527_g1,c303786_g1,c320542_g1,c89704_g1	CC	0.04253	0.0446414	11	28	6
GO:0032580	Golgi cisterna membrane	c102060_g1,c130202_g1,c180412_g1,c194720_g1,c205992_g2,c217836_g1,c225856_g2,c303527_g1,c303786_g1,c320542_g1,c89704_g1	CC	0.04253	0.0446414	11	28	6
GO:0044438	microbody part	c108772_g1,c175921_g1,c180363_g1,c187939_g1,c190584_g1,c199745_g1,c222295_g1,c226707_g1,c228179_g3,c232599_g1,c267532_g1	CC	0.04253	0.0446414	11	28	4
GO:0044439	peroxisomal part	c108772_g1,c175921_g1,c180363_g1,c187939_g1,c190584_g1,c199745_g1,c222295_g1,c226707_g1,c228179_g3,c232599_g1,c267532_g1	CC	0.04253	0.0446414	11	28	5
GO:0005773	vacuole	c101862_g1,c131667_g1,c152081_g1,c157045_g1,c157250_g1,c160060_g1,c169637_g1,c169640_g1,c169674_g1,c173707_g2,c174434_g1,c174489_g1,c177924_g3,c182497_g1,c183886_g1,c184727_g1,c185089_g1,c187199_g1,c187783_g1,c190035_g2,c196763_g1,c197596_g1,c198912_g1,c199102_g1,c199449_g1,c199822_g1,c199822_g2,c200094_g1,c201026_g1,c201280_g1,c205910_g1,c209237_g1,c211291_g1,c212350_g2,c212989_g1,c215057_g3,c21…	CC	0.04938	0.0500564	61	216	5
GO:0005788	endoplasmic reticulum lumen	c172511_g1,c174453_g1,c190770_g1,c193726_g1,c201120_g1,c224668_g1,c224668_g2,c225626_g1,c228695_g2	CC	0.04974	0.04974	9	22	5

## Sheet: DS2_Up
GO_accession	Description	GeneNames	Ontology	pValue	qValue	fg	bg	GO_level
GO:0044281	small molecule metabolic process	c102055_g1,c102274_g1,c108834_g2,c110032_g1,c110032_g2,c130388_g1,c130963_g1,c131317_g1,c131861_g1,c137211_g1,c137472_g1,c137532_g1,c137532_g2,c139238_g1,c140023_g1,c144184_g1,c144434_g1,c146942_g1,c148213_g1,c148262_g1,c148313_g1,c149524_g1,c150469_g1,c151047_g1,c151047_g2,c151047_g4,c153099_g1,c153259_g1,c154301_g2,c154738_g1,c156181_g1,c158031_g1,c158643_g1,c159481_g1,c160544_g1,c161865_g1,c16…	BP	1.1e-15	2.321e-13	230	760	3
GO:0019693	ribose phosphate metabolic process	c110032_g1,c110032_g2,c137211_g1,c139238_g1,c140023_g1,c146942_g1,c148213_g1,c151047_g1,c151047_g2,c151047_g4,c153259_g1,c154301_g2,c158643_g1,c160544_g1,c161865_g1,c162291_g1,c169523_g1,c173745_g1,c181634_g1,c185622_g1,c197145_g1,c197168_g1,c198040_g1,c198069_g1,c198119_g3,c198703_g1,c198928_g1,c199516_g1,c199759_g1,c199794_g1,c201148_g1,c204298_g1,c204369_g2,c206088_g1,c208395_g1,c208759_g1,c20…	BP	1.1e-13	1.1605e-11	61	128	5
GO:0055086	nucleobase-containing small molecule metabolic process	c110032_g1,c110032_g2,c131861_g1,c137211_g1,c139238_g1,c140023_g1,c146942_g1,c148213_g1,c151047_g1,c151047_g2,c151047_g4,c153259_g1,c154301_g2,c158643_g1,c160544_g1,c161865_g1,c162291_g1,c169523_g1,c173745_g1,c181634_g1,c185622_g1,c186154_g1,c190282_g2,c190639_g1,c197145_g1,c197168_g1,c197267_g1,c198040_g1,c198069_g1,c198119_g3,c198703_g1,c198928_g1,c199516_g1,c199759_g1,c199794_g1,c200690_g1,c20…	BP	1.5e-13	1.055e-11	83	202	4
GO:0006753	nucleoside phosphate metabolic process	c110032_g1,c110032_g2,c137211_g1,c139238_g1,c140023_g1,c146942_g1,c148213_g1,c151047_g1,c151047_g2,c151047_g4,c153259_g1,c154301_g2,c158643_g1,c160544_g1,c161865_g1,c162291_g1,c169523_g1,c173745_g1,c181634_g1,c185622_g1,c186154_g1,c190282_g2,c190639_g1,c197145_g1,c197168_g1,c197267_g1,c198040_g1,c198069_g1,c198119_g3,c198703_g1,c198928_g1,c199516_g1,c199759_g1,c199794_g1,c201148_g1,c204298_g1,c20…	BP	2.4e-13	1.12533e-11	70	159	5
GO:0009117	nucleotide metabolic process	c110032_g1,c110032_g2,c137211_g1,c139238_g1,c140023_g1,c146942_g1,c148213_g1,c151047_g1,c151047_g2,c151047_g4,c153259_g1,c154301_g2,c158643_g1,c160544_g1,c161865_g1,c162291_g1,c169523_g1,c173745_g1,c181634_g1,c185622_g1,c186154_g1,c190282_g2,c190639_g1,c197145_g1,c197168_g1,c197267_g1,c198040_g1,c198069_g1,c198119_g3,c198703_g1,c198928_g1,c199516_g1,c199759_g1,c199794_g1,c201148_g1,c204298_g1,c20…	BP	2.4e-13	1.12533e-11	70	159	6
GO:0009156	ribonucleoside monophosphate biosynthetic process	c110032_g1,c110032_g2,c137211_g1,c139238_g1,c140023_g1,c146942_g1,c151047_g1,c151047_g2,c151047_g4,c153259_g1,c154301_g2,c158643_g1,c160544_g1,c161865_g1,c162291_g1,c169523_g1,c173745_g1,c181634_g1,c185622_g1,c197145_g1,c197168_g1,c198040_g1,c198069_g1,c198119_g3,c198703_g1,c199516_g1,c199759_g1,c199794_g1,c201148_g1,c204298_g1,c204369_g2,c206088_g1,c208395_g1,c209207_g1,c210130_g2,c210609_g1,c21…	BP	1.1e-12	3.57077e-11	53	108	8
GO:0009161	ribonucleoside monophosphate metabolic process	c110032_g1,c110032_g2,c137211_g1,c139238_g1,c140023_g1,c146942_g1,c151047_g1,c151047_g2,c151047_g4,c153259_g1,c154301_g2,c158643_g1,c160544_g1,c161865_g1,c162291_g1,c169523_g1,c173745_g1,c181634_g1,c185622_g1,c197145_g1,c197168_g1,c198040_g1,c198069_g1,c198119_g3,c198703_g1,c199516_g1,c199759_g1,c199794_g1,c201148_g1,c204298_g1,c204369_g2,c206088_g1,c208395_g1,c209207_g1,c210130_g2,c210609_g1,c21…	BP	1.1e-12	3.57077e-11	53	108	7
GO:0009123	nucleoside monophosphate metabolic process	c110032_g1,c110032_g2,c137211_g1,c139238_g1,c140023_g1,c146942_g1,c151047_g1,c151047_g2,c151047_g4,c153259_g1,c154301_g2,c158643_g1,c160544_g1,c161865_g1,c162291_g1,c169523_g1,c173745_g1,c181634_g1,c185622_g1,c197145_g1,c197168_g1,c198040_g1,c198069_g1,c198119_g3,c198703_g1,c199516_g1,c199759_g1,c199794_g1,c201148_g1,c204298_g1,c204369_g2,c206088_g1,c208395_g1,c209207_g1,c210130_g2,c210609_g1,c21…	BP	2.8e-12	6.95059e-11	53	110	6
GO:0009124	nucleoside monophosphate biosynthetic process	c110032_g1,c110032_g2,c137211_g1,c139238_g1,c140023_g1,c146942_g1,c151047_g1,c151047_g2,c151047_g4,c153259_g1,c154301_g2,c158643_g1,c160544_g1,c161865_g1,c162291_g1,c169523_g1,c173745_g1,c181634_g1,c185622_g1,c197145_g1,c197168_g1,c198040_g1,c198069_g1,c198119_g3,c198703_g1,c199516_g1,c199759_g1,c199794_g1,c201148_g1,c204298_g1,c204369_g2,c206088_g1,c208395_g1,c209207_g1,c210130_g2,c210609_g1,c21…	BP	2.8e-12	6.95059e-11	53	110	7
GO:0009126	purine nucleoside monophosphate metabolic process	c110032_g1,c110032_g2,c137211_g1,c139238_g1,c140023_g1,c146942_g1,c151047_g1,c151047_g2,c151047_g4,c154301_g2,c158643_g1,c160544_g1,c161865_g1,c162291_g1,c169523_g1,c173745_g1,c181634_g1,c185622_g1,c197168_g1,c198040_g1,c198069_g1,c199516_g1,c199759_g1,c199794_g1,c201148_g1,c204298_g1,c204369_g2,c206088_g1,c208395_g1,c209207_g1,c210130_g2,c210609_g1,c211285_g1,c212216_g1,c212216_g2,c214371_g9,c21…	BP	3.4e-12	6.23826e-11	47	92	7
GO:0009127	purine nucleoside monophosphate biosynthetic process	c110032_g1,c110032_g2,c137211_g1,c139238_g1,c140023_g1,c146942_g1,c151047_g1,c151047_g2,c151047_g4,c154301_g2,c158643_g1,c160544_g1,c161865_g1,c162291_g1,c169523_g1,c173745_g1,c181634_g1,c185622_g1,c197168_g1,c198040_g1,c198069_g1,c199516_g1,c199759_g1,c199794_g1,c201148_g1,c204298_g1,c204369_g2,c206088_g1,c208395_g1,c209207_g1,c210130_g2,c210609_g1,c211285_g1,c212216_g1,c212216_g2,c214371_g9,c21…	BP	3.4e-12	6.23826e-11	47	92	8
GO:0009167	purine ribonucleoside monophosphate metabolic process	c110032_g1,c110032_g2,c137211_g1,c139238_g1,c140023_g1,c146942_g1,c151047_g1,c151047_g2,c151047_g4,c154301_g2,c158643_g1,c160544_g1,c161865_g1,c162291_g1,c169523_g1,c173745_g1,c181634_g1,c185622_g1,c197168_g1,c198040_g1,c198069_g1,c199516_g1,c199759_g1,c199794_g1,c201148_g1,c204298_g1,c204369_g2,c206088_g1,c208395_g1,c209207_g1,c210130_g2,c210609_g1,c211285_g1,c212216_g1,c212216_g2,c214371_g9,c21…	BP	3.4e-12	6.23826e-11	47	92	8
GO:0009168	purine ribonucleoside monophosphate biosynthetic process	c110032_g1,c110032_g2,c137211_g1,c139238_g1,c140023_g1,c146942_g1,c151047_g1,c151047_g2,c151047_g4,c154301_g2,c158643_g1,c160544_g1,c161865_g1,c162291_g1,c169523_g1,c173745_g1,c181634_g1,c185622_g1,c197168_g1,c198040_g1,c198069_g1,c199516_g1,c199759_g1,c199794_g1,c201148_g1,c204298_g1,c204369_g2,c206088_g1,c208395_g1,c209207_g1,c210130_g2,c210609_g1,c211285_g1,c212216_g1,c212216_g2,c214371_g9,c21…	BP	3.4e-12	6.23826e-11	47	92	9
GO:0006732	coenzyme metabolic process	c110032_g1,c110032_g2,c137211_g1,c137472_g1,c139238_g1,c140023_g1,c144434_g1,c148213_g1,c151047_g1,c151047_g2,c151047_g4,c154301_g2,c158643_g1,c159481_g1,c161865_g1,c162045_g1,c162045_g2,c170920_g1,c176328_g1,c177014_g1,c181634_g1,c186154_g1,c190639_g1,c197168_g1,c198703_g1,c198928_g1,c199516_g1,c199759_g1,c199794_g1,c201148_g1,c203633_g1,c204369_g2,c204415_g1,c204873_g1,c205001_g1,c205182_g1,c20…	BP	3.7e-12	5.57643e-11	73	177	5
GO:0009259	ribonucleotide metabolic process	c110032_g1,c110032_g2,c137211_g1,c139238_g1,c140023_g1,c146942_g1,c151047_g1,c151047_g2,c151047_g4,c153259_g1,c154301_g2,c158643_g1,c160544_g1,c161865_g1,c162291_g1,c169523_g1,c173745_g1,c181634_g1,c185622_g1,c197145_g1,c197168_g1,c198040_g1,c198069_g1,c198119_g3,c198703_g1,c199516_g1,c199759_g1,c199794_g1,c201148_g1,c204298_g1,c204369_g2,c206088_g1,c208395_g1,c208759_g1,c209207_g1,c210130_g2,c21…	BP	4e-12	5.275e-11	54	114	6
GO:0009260	ribonucleotide biosynthetic process	c110032_g1,c110032_g2,c137211_g1,c139238_g1,c140023_g1,c146942_g1,c151047_g1,c151047_g2,c151047_g4,c153259_g1,c154301_g2,c158643_g1,c160544_g1,c161865_g1,c162291_g1,c169523_g1,c173745_g1,c181634_g1,c185622_g1,c197145_g1,c197168_g1,c198040_g1,c198069_g1,c198119_g3,c198703_g1,c199516_g1,c199759_g1,c199794_g1,c201148_g1,c204298_g1,c204369_g2,c206088_g1,c208395_g1,c208759_g1,c209207_g1,c210130_g2,c21…	BP	4e-12	5.275e-11	54	114	7
GO:0046390	ribose phosphate biosynthetic process	c110032_g1,c110032_g2,c137211_g1,c139238_g1,c140023_g1,c146942_g1,c151047_g1,c151047_g2,c151047_g4,c153259_g1,c154301_g2,c158643_g1,c160544_g1,c161865_g1,c162291_g1,c169523_g1,c173745_g1,c181634_g1,c185622_g1,c197145_g1,c197168_g1,c198040_g1,c198069_g1,c198119_g3,c198703_g1,c199516_g1,c199759_g1,c199794_g1,c201148_g1,c204298_g1,c204369_g2,c206088_g1,c208395_g1,c208759_g1,c209207_g1,c210130_g2,c21…	BP	4e-12	5.275e-11	54	114	6
GO:0072522	purine-containing compound biosynthetic process	c110032_g1,c110032_g2,c137211_g1,c139238_g1,c140023_g1,c146942_g1,c151047_g1,c151047_g2,c151047_g4,c154301_g2,c158643_g1,c160544_g1,c161865_g1,c162291_g1,c169523_g1,c173745_g1,c181634_g1,c185622_g1,c197168_g1,c198040_g1,c198069_g1,c199516_g1,c199759_g1,c199794_g1,c201148_g1,c204298_g1,c204369_g2,c206088_g1,c208395_g1,c208759_g1,c209207_g1,c210130_g2,c210609_g1,c211285_g1,c212216_g1,c212216_g2,c21…	BP	5.1e-12	5.97833e-11	50	102	6
GO:0034404	nucleobase-containing small molecule biosynthetic process	c110032_g1,c110032_g2,c137211_g1,c139238_g1,c140023_g1,c151047_g1,c151047_g2,c151047_g4,c153259_g1,c154301_g2,c158643_g1,c161865_g1,c162291_g1,c173745_g1,c181634_g1,c197145_g1,c197168_g1,c198119_g3,c199516_g1,c199759_g1,c199794_g1,c201148_g1,c204369_g2,c206088_g1,c208395_g1,c209207_g1,c210609_g1,c211285_g1,c212216_g1,c212216_g2,c21544_g1,c217065_g1,c220308_g1,c221451_g4,c224117_g2,c224117_g8,c225…	BP	9.1e-12	1.01058e-10	43	82	5
GO:0006163	purine nucleotide metabolic process	c110032_g1,c110032_g2,c137211_g1,c139238_g1,c140023_g1,c146942_g1,c151047_g1,c151047_g2,c151047_g4,c154301_g2,c158643_g1,c160544_g1,c161865_g1,c162291_g1,c169523_g1,c173745_g1,c181634_g1,c185622_g1,c197168_g1,c198040_g1,c198069_g1,c199516_g1,c199759_g1,c199794_g1,c201148_g1,c204298_g1,c204369_g2,c206088_g1,c208395_g1,c208759_g1,c209207_g1,c210130_g2,c210609_g1,c211285_g1,c212216_g1,c212216_g2,c21…	BP	1.4e-11	1.37395e-10	48	98	6
GO:0006164	purine nucleotide biosynthetic process	c110032_g1,c110032_g2,c137211_g1,c139238_g1,c140023_g1,c146942_g1,c151047_g1,c151047_g2,c151047_g4,c154301_g2,c158643_g1,c160544_g1,c161865_g1,c162291_g1,c169523_g1,c173745_g1,c181634_g1,c185622_g1,c197168_g1,c198040_g1,c198069_g1,c199516_g1,c199759_g1,c199794_g1,c201148_g1,c204298_g1,c204369_g2,c206088_g1,c208395_g1,c208759_g1,c209207_g1,c210130_g2,c210609_g1,c211285_g1,c212216_g1,c212216_g2,c21…	BP	1.4e-11	1.37395e-10	48	98	7
GO:0009150	purine ribonucleotide metabolic process	c110032_g1,c110032_g2,c137211_g1,c139238_g1,c140023_g1,c146942_g1,c151047_g1,c151047_g2,c151047_g4,c154301_g2,c158643_g1,c160544_g1,c161865_g1,c162291_g1,c169523_g1,c173745_g1,c181634_g1,c185622_g1,c197168_g1,c198040_g1,c198069_g1,c199516_g1,c199759_g1,c199794_g1,c201148_g1,c204298_g1,c204369_g2,c206088_g1,c208395_g1,c208759_g1,c209207_g1,c210130_g2,c210609_g1,c211285_g1,c212216_g1,c212216_g2,c21…	BP	1.4e-11	1.37395e-10	48	98	7
GO:0009152	purine ribonucleotide biosynthetic process	c110032_g1,c110032_g2,c137211_g1,c139238_g1,c140023_g1,c146942_g1,c151047_g1,c151047_g2,c151047_g4,c154301_g2,c158643_g1,c160544_g1,c161865_g1,c162291_g1,c169523_g1,c173745_g1,c181634_g1,c185622_g1,c197168_g1,c198040_g1,c198069_g1,c199516_g1,c199759_g1,c199794_g1,c201148_g1,c204298_g1,c204369_g2,c206088_g1,c208395_g1,c208759_g1,c209207_g1,c210130_g2,c210609_g1,c211285_g1,c212216_g1,c212216_g2,c21…	BP	1.4e-11	1.37395e-10	48	98	8
GO:0009199	ribonucleoside triphosphate metabolic process	c110032_g1,c110032_g2,c137211_g1,c139238_g1,c140023_g1,c146942_g1,c151047_g1,c151047_g2,c151047_g4,c154301_g2,c158643_g1,c160544_g1,c161865_g1,c169523_g1,c181634_g1,c185622_g1,c197168_g1,c198040_g1,c198119_g3,c199516_g1,c199759_g1,c199794_g1,c201148_g1,c204298_g1,c204369_g2,c206088_g1,c209207_g1,c210609_g1,c211285_g1,c212216_g1,c212216_g2,c21544_g1,c220308_g1,c221451_g4,c225822_g3,c226869_g1,c228…	BP	1.5e-11	1.29184e-10	41	77	7
GO:0009201	ribonucleoside triphosphate biosynthetic process	c110032_g1,c110032_g2,c137211_g1,c139238_g1,c140023_g1,c146942_g1,c151047_g1,c151047_g2,c151047_g4,c154301_g2,c158643_g1,c160544_g1,c161865_g1,c169523_g1,c181634_g1,c185622_g1,c197168_g1,c198040_g1,c198119_g3,c199516_g1,c199759_g1,c199794_g1,c201148_g1,c204298_g1,c204369_g2,c206088_g1,c209207_g1,c210609_g1,c211285_g1,c212216_g1,c212216_g2,c21544_g1,c220308_g1,c221451_g4,c225822_g3,c226869_g1,c228…	BP	1.5e-11	1.29184e-10	41	77	8
GO:0009141	nucleoside triphosphate metabolic process	c110032_g1,c110032_g2,c137211_g1,c139238_g1,c140023_g1,c146942_g1,c151047_g1,c151047_g2,c151047_g4,c154301_g2,c158643_g1,c160544_g1,c161865_g1,c169523_g1,c181634_g1,c185622_g1,c197168_g1,c198040_g1,c198119_g3,c199516_g1,c199759_g1,c199794_g1,c201148_g1,c204298_g1,c204369_g2,c206088_g1,c209207_g1,c210609_g1,c211285_g1,c212216_g1,c212216_g2,c21544_g1,c220308_g1,c221451_g4,c225822_g3,c226869_g1,c228…	BP	2.5e-11	1.99057e-10	41	78	6
GO:0009142	nucleoside triphosphate biosynthetic process	c110032_g1,c110032_g2,c137211_g1,c139238_g1,c140023_g1,c146942_g1,c151047_g1,c151047_g2,c151047_g4,c154301_g2,c158643_g1,c160544_g1,c161865_g1,c169523_g1,c181634_g1,c185622_g1,c197168_g1,c198040_g1,c198119_g3,c199516_g1,c199759_g1,c199794_g1,c201148_g1,c204298_g1,c204369_g2,c206088_g1,c209207_g1,c210609_g1,c211285_g1,c212216_g1,c212216_g2,c21544_g1,c220308_g1,c221451_g4,c225822_g3,c226869_g1,c228…	BP	2.5e-11	1.99057e-10	41	78	7
GO:0006754	ATP biosynthetic process	c110032_g1,c110032_g2,c137211_g1,c139238_g1,c140023_g1,c146942_g1,c151047_g1,c151047_g2,c151047_g4,c154301_g2,c158643_g1,c160544_g1,c161865_g1,c169523_g1,c181634_g1,c185622_g1,c197168_g1,c198040_g1,c199516_g1,c199759_g1,c199794_g1,c201148_g1,c204298_g1,c204369_g2,c206088_g1,c209207_g1,c210609_g1,c211285_g1,c212216_g1,c212216_g2,c21544_g1,c220308_g1,c221451_g4,c226869_g1,c228355_g2,c230462_g1,c231…	BP	4.1e-11	2.79065e-10	39	73	6
GO:0009144	purine nucleoside triphosphate metabolic process	c110032_g1,c110032_g2,c137211_g1,c139238_g1,c140023_g1,c146942_g1,c151047_g1,c151047_g2,c151047_g4,c154301_g2,c158643_g1,c160544_g1,c161865_g1,c169523_g1,c181634_g1,c185622_g1,c197168_g1,c198040_g1,c199516_g1,c199759_g1,c199794_g1,c201148_g1,c204298_g1,c204369_g2,c206088_g1,c209207_g1,c210609_g1,c211285_g1,c212216_g1,c212216_g2,c21544_g1,c220308_g1,c221451_g4,c226869_g1,c228355_g2,c230462_g1,c231…	BP	4.1e-11	2.79065e-10	39	73	7
GO:0009145	purine nucleoside triphosphate biosynthetic process	c110032_g1,c110032_g2,c137211_g1,c139238_g1,c140023_g1,c146942_g1,c151047_g1,c151047_g2,c151047_g4,c154301_g2,c158643_g1,c160544_g1,c161865_g1,c169523_g1,c181634_g1,c185622_g1,c197168_g1,c198040_g1,c199516_g1,c199759_g1,c199794_g1,c201148_g1,c204298_g1,c204369_g2,c206088_g1,c209207_g1,c210609_g1,c211285_g1,c212216_g1,c212216_g2,c21544_g1,c220308_g1,c221451_g4,c226869_g1,c228355_g2,c230462_g1,c231…	BP	4.1e-11	2.79065e-10	39	73	8
GO:0009205	purine ribonucleoside triphosphate metabolic process	c110032_g1,c110032_g2,c137211_g1,c139238_g1,c140023_g1,c146942_g1,c151047_g1,c151047_g2,c151047_g4,c154301_g2,c158643_g1,c160544_g1,c161865_g1,c169523_g1,c181634_g1,c185622_g1,c197168_g1,c198040_g1,c199516_g1,c199759_g1,c199794_g1,c201148_g1,c204298_g1,c204369_g2,c206088_g1,c209207_g1,c210609_g1,c211285_g1,c212216_g1,c212216_g2,c21544_g1,c220308_g1,c221451_g4,c226869_g1,c228355_g2,c230462_g1,c231…	BP	4.1e-11	2.79065e-10	39	73	8
GO:0009206	purine ribonucleoside triphosphate biosynthetic process	c110032_g1,c110032_g2,c137211_g1,c139238_g1,c140023_g1,c146942_g1,c151047_g1,c151047_g2,c151047_g4,c154301_g2,c158643_g1,c160544_g1,c161865_g1,c169523_g1,c181634_g1,c185622_g1,c197168_g1,c198040_g1,c199516_g1,c199759_g1,c199794_g1,c201148_g1,c204298_g1,c204369_g2,c206088_g1,c209207_g1,c210609_g1,c211285_g1,c212216_g1,c212216_g2,c21544_g1,c220308_g1,c221451_g4,c226869_g1,c228355_g2,c230462_g1,c231…	BP	4.1e-11	2.79065e-10	39	73	9
GO:0046034	ATP metabolic process	c110032_g1,c110032_g2,c137211_g1,c139238_g1,c140023_g1,c146942_g1,c151047_g1,c151047_g2,c151047_g4,c154301_g2,c158643_g1,c160544_g1,c161865_g1,c169523_g1,c181634_g1,c185622_g1,c197168_g1,c198040_g1,c199516_g1,c199759_g1,c199794_g1,c201148_g1,c204298_g1,c204369_g2,c206088_g1,c209207_g1,c210609_g1,c211285_g1,c212216_g1,c212216_g2,c21544_g1,c220308_g1,c221451_g4,c226869_g1,c228355_g2,c230462_g1,c231…	BP	4.1e-11	2.79065e-10	39	73	5
GO:0006733	oxidoreduction coenzyme metabolic process	c110032_g1,c110032_g2,c137211_g1,c139238_g1,c140023_g1,c148213_g1,c151047_g1,c151047_g2,c151047_g4,c154301_g2,c158643_g1,c161865_g1,c181634_g1,c190639_g1,c197168_g1,c198928_g1,c199516_g1,c199759_g1,c199794_g1,c201148_g1,c204369_g2,c206088_g1,c209207_g1,c209751_g2,c210398_g1,c210609_g1,c211285_g1,c212216_g1,c212216_g2,c213917_g5,c21544_g1,c220308_g1,c221451_g4,c226776_g2,c226869_g1,c228355_g2,c230…	BP	4.1e-11	2.79065e-10	45	91	6
GO:0009165	nucleotide biosynthetic process	c110032_g1,c110032_g2,c137211_g1,c139238_g1,c140023_g1,c146942_g1,c151047_g1,c151047_g2,c151047_g4,c153259_g1,c154301_g2,c158643_g1,c160544_g1,c161865_g1,c162291_g1,c169523_g1,c173745_g1,c181634_g1,c185622_g1,c186154_g1,c190639_g1,c197145_g1,c197168_g1,c198040_g1,c198069_g1,c198119_g3,c198703_g1,c199516_g1,c199759_g1,c199794_g1,c201148_g1,c204298_g1,c204369_g2,c204415_g1,c206088_g1,c208395_g1,c20…	BP	5.7e-11	3.38789e-10	59	137	7
GO:1901293	nucleoside phosphate biosynthetic process	c110032_g1,c110032_g2,c137211_g1,c139238_g1,c140023_g1,c146942_g1,c151047_g1,c151047_g2,c151047_g4,c153259_g1,c154301_g2,c158643_g1,c160544_g1,c161865_g1,c162291_g1,c169523_g1,c173745_g1,c181634_g1,c185622_g1,c186154_g1,c190639_g1,c197145_g1,c197168_g1,c198040_g1,c198069_g1,c198119_g3,c198703_g1,c199516_g1,c199759_g1,c199794_g1,c201148_g1,c204298_g1,c204369_g2,c204415_g1,c206088_g1,c208395_g1,c20…	BP	5.7e-11	3.38789e-10	59	137	6
GO:0006091	generation of precursor metabolites and energy	c110032_g1,c110032_g2,c137211_g1,c139238_g1,c140023_g1,c148313_g1,c149524_g1,c151047_g1,c151047_g2,c151047_g4,c154301_g2,c154738_g1,c158643_g1,c161865_g1,c174815_g1,c177014_g1,c179932_g1,c181634_g1,c183933_g1,c186306_g3,c190716_g1,c197168_g1,c199516_g1,c199759_g1,c199794_g1,c201148_g1,c204369_g2,c206088_g1,c208697_g1,c209207_g1,c210609_g1,c211285_g1,c211423_g1,c212216_g1,c212216_g2,c213599_g2,c21…	BP	7.3e-11	4.16297e-10	50	108	4
GO:0017144	drug metabolic process	c108834_g2,c110032_g1,c110032_g2,c137211_g1,c139238_g1,c140023_g1,c146118_g2,c146942_g1,c148313_g1,c148995_g2,c149524_g1,c151047_g1,c151047_g2,c151047_g4,c153099_g1,c154301_g2,c154738_g1,c156181_g1,c158643_g1,c160544_g1,c161865_g1,c162291_g1,c167071_g1,c169523_g1,c172396_g1,c173745_g1,c174467_g1,c174815_g1,c177014_g1,c179932_g1,c181261_g1,c181634_g1,c183933_g1,c185622_g1,c186306_g3,c190716_g1,c19…	BP	1e-10	5.55263e-10	107	316	4
GO:0072521	purine-containing compound metabolic process	c110032_g1,c110032_g2,c137211_g1,c139238_g1,c140023_g1,c146942_g1,c151047_g1,c151047_g2,c151047_g4,c154301_g2,c158643_g1,c160544_g1,c161865_g1,c162291_g1,c169523_g1,c173745_g1,c181634_g1,c185622_g1,c197168_g1,c198040_g1,c198069_g1,c199516_g1,c199759_g1,c199794_g1,c201148_g1,c204298_g1,c204369_g2,c206088_g1,c208395_g1,c208759_g1,c209207_g1,c210130_g2,c210609_g1,c211285_g1,c212216_g1,c212216_g2,c21…	BP	1.1e-10	5.95128e-10	50	109	5
GO:0019362	pyridine nucleotide metabolic process	c110032_g1,c110032_g2,c137211_g1,c139238_g1,c140023_g1,c148213_g1,c151047_g1,c151047_g2,c151047_g4,c154301_g2,c158643_g1,c161865_g1,c181634_g1,c190639_g1,c197168_g1,c198928_g1,c199516_g1,c199759_g1,c199794_g1,c201148_g1,c204369_g2,c206088_g1,c209207_g1,c209751_g2,c210398_g1,c210609_g1,c211285_g1,c212216_g1,c212216_g2,c21544_g1,c220308_g1,c221451_g4,c226869_g1,c228355_g2,c230462_g1,c230576_g2,c231…	BP	1.2e-10	6.33e-10	42	84	6
GO:0043436	oxoacid metabolic process	c102055_g1,c102274_g1,c110032_g1,c110032_g2,c130388_g1,c131317_g1,c137211_g1,c137472_g1,c137532_g1,c137532_g2,c139238_g1,c140023_g1,c144184_g1,c144434_g1,c148262_g1,c148313_g1,c149524_g1,c150469_g1,c151047_g1,c151047_g2,c151047_g4,c153099_g1,c153259_g1,c154301_g2,c154738_g1,c158031_g1,c158643_g1,c159481_g1,c161865_g1,c162045_g1,c162045_g2,c162455_g1,c169632_g1,c170920_g1,c174815_g1,c176328_g1,c17…	BP	1.6e-10	8.23415e-10	159	531	5
GO:0046496	nicotinamide nucleotide metabolic process	c110032_g1,c110032_g2,c137211_g1,c139238_g1,c140023_g1,c148213_g1,c151047_g1,c151047_g2,c151047_g4,c154301_g2,c158643_g1,c161865_g1,c181634_g1,c197168_g1,c198928_g1,c199516_g1,c199759_g1,c199794_g1,c201148_g1,c204369_g2,c206088_g1,c209207_g1,c209751_g2,c210398_g1,c210609_g1,c211285_g1,c212216_g1,c212216_g2,c21544_g1,c220308_g1,c221451_g4,c226869_g1,c228355_g2,c230462_g1,c230576_g2,c231134_g6,c267…	BP	2e-10	1.00476e-09	41	82	7
GO:0019752	carboxylic acid metabolic process	c102055_g1,c110032_g1,c110032_g2,c130388_g1,c131317_g1,c137211_g1,c137472_g1,c137532_g1,c137532_g2,c139238_g1,c140023_g1,c144184_g1,c144434_g1,c148262_g1,c148313_g1,c149524_g1,c150469_g1,c151047_g1,c151047_g2,c151047_g4,c153099_g1,c153259_g1,c154301_g2,c154738_g1,c158031_g1,c158643_g1,c159481_g1,c161865_g1,c162045_g1,c162045_g2,c162455_g1,c169632_g1,c170920_g1,c174815_g1,c176328_g1,c176474_g1,c17…	BP	2.3e-10	1.1286e-09	153	508	6
GO:0006082	organic acid metabolic process	c102055_g1,c102274_g1,c110032_g1,c110032_g2,c130388_g1,c131317_g1,c137211_g1,c137472_g1,c137532_g1,c137532_g2,c139238_g1,c140023_g1,c144184_g1,c144434_g1,c148262_g1,c148313_g1,c149524_g1,c150469_g1,c151047_g1,c151047_g2,c151047_g4,c153099_g1,c153259_g1,c154301_g2,c154738_g1,c158031_g1,c158643_g1,c159481_g1,c161865_g1,c162045_g1,c162045_g2,c162455_g1,c169632_g1,c170920_g1,c174815_g1,c176328_g1,c17…	BP	2.5e-10	1.19886e-09	159	534	4
GO:0006096	glycolytic process	c110032_g1,c110032_g2,c137211_g1,c139238_g1,c140023_g1,c151047_g1,c151047_g2,c151047_g4,c154301_g2,c158643_g1,c161865_g1,c181634_g1,c197168_g1,c199516_g1,c199759_g1,c199794_g1,c201148_g1,c204369_g2,c206088_g1,c209207_g1,c210609_g1,c211285_g1,c212216_g1,c212216_g2,c21544_g1,c220308_g1,c221451_g4,c226869_g1,c228355_g2,c230462_g1,c231134_g6,c320611_g1,c35949_g1	BP	4.7e-10	1.96376e-09	33	60	#N/A
GO:0006165	nucleoside diphosphate phosphorylation	c110032_g1,c110032_g2,c137211_g1,c139238_g1,c140023_g1,c151047_g1,c151047_g2,c151047_g4,c154301_g2,c158643_g1,c161865_g1,c181634_g1,c197168_g1,c199516_g1,c199759_g1,c199794_g1,c201148_g1,c204369_g2,c206088_g1,c209207_g1,c210609_g1,c211285_g1,c212216_g1,c212216_g2,c21544_g1,c220308_g1,c221451_g4,c226869_g1,c228355_g2,c230462_g1,c231134_g6,c320611_g1,c35949_g1	BP	4.7e-10	1.96376e-09	33	60	7
GO:0006757	ATP generation from ADP	c110032_g1,c110032_g2,c137211_g1,c139238_g1,c140023_g1,c151047_g1,c151047_g2,c151047_g4,c154301_g2,c158643_g1,c161865_g1,c181634_g1,c197168_g1,c199516_g1,c199759_g1,c199794_g1,c201148_g1,c204369_g2,c206088_g1,c209207_g1,c210609_g1,c211285_g1,c212216_g1,c212216_g2,c21544_g1,c220308_g1,c221451_g4,c226869_g1,c228355_g2,c230462_g1,c231134_g6,c320611_g1,c35949_g1	BP	4.7e-10	1.96376e-09	33	60	5
GO:0009132	nucleoside diphosphate metabolic process	c110032_g1,c110032_g2,c137211_g1,c139238_g1,c140023_g1,c151047_g1,c151047_g2,c151047_g4,c154301_g2,c158643_g1,c161865_g1,c181634_g1,c197168_g1,c199516_g1,c199759_g1,c199794_g1,c201148_g1,c204369_g2,c206088_g1,c209207_g1,c210609_g1,c211285_g1,c212216_g1,c212216_g2,c21544_g1,c220308_g1,c221451_g4,c226869_g1,c228355_g2,c230462_g1,c231134_g6,c320611_g1,c35949_g1	BP	4.7e-10	1.96376e-09	33	60	6
GO:0009135	purine nucleoside diphosphate metabolic process	c110032_g1,c110032_g2,c137211_g1,c139238_g1,c140023_g1,c151047_g1,c151047_g2,c151047_g4,c154301_g2,c158643_g1,c161865_g1,c181634_g1,c197168_g1,c199516_g1,c199759_g1,c199794_g1,c201148_g1,c204369_g2,c206088_g1,c209207_g1,c210609_g1,c211285_g1,c212216_g1,c212216_g2,c21544_g1,c220308_g1,c221451_g4,c226869_g1,c228355_g2,c230462_g1,c231134_g6,c320611_g1,c35949_g1	BP	4.7e-10	1.96376e-09	33	60	7
GO:0009166	nucleotide catabolic process	c110032_g1,c110032_g2,c137211_g1,c139238_g1,c140023_g1,c151047_g1,c151047_g2,c151047_g4,c154301_g2,c158643_g1,c161865_g1,c181634_g1,c197168_g1,c199516_g1,c199759_g1,c199794_g1,c201148_g1,c204369_g2,c206088_g1,c209207_g1,c210609_g1,c211285_g1,c212216_g1,c212216_g2,c21544_g1,c220308_g1,c221451_g4,c226869_g1,c228355_g2,c230462_g1,c231134_g6,c320611_g1,c35949_g1	BP	4.7e-10	1.96376e-09	33	60	7
GO:0009179	purine ribonucleoside diphosphate metabolic process	c110032_g1,c110032_g2,c137211_g1,c139238_g1,c140023_g1,c151047_g1,c151047_g2,c151047_g4,c154301_g2,c158643_g1,c161865_g1,c181634_g1,c197168_g1,c199516_g1,c199759_g1,c199794_g1,c201148_g1,c204369_g2,c206088_g1,c209207_g1,c210609_g1,c211285_g1,c212216_g1,c212216_g2,c21544_g1,c220308_g1,c221451_g4,c226869_g1,c228355_g2,c230462_g1,c231134_g6,c320611_g1,c35949_g1	BP	4.7e-10	1.96376e-09	33	60	8
GO:0009185	ribonucleoside diphosphate metabolic process	c110032_g1,c110032_g2,c137211_g1,c139238_g1,c140023_g1,c151047_g1,c151047_g2,c151047_g4,c154301_g2,c158643_g1,c161865_g1,c181634_g1,c197168_g1,c199516_g1,c199759_g1,c199794_g1,c201148_g1,c204369_g2,c206088_g1,c209207_g1,c210609_g1,c211285_g1,c212216_g1,c212216_g2,c21544_g1,c220308_g1,c221451_g4,c226869_g1,c228355_g2,c230462_g1,c231134_g6,c320611_g1,c35949_g1	BP	4.7e-10	1.96376e-09	33	60	7
GO:0042866	pyruvate biosynthetic process	c110032_g1,c110032_g2,c137211_g1,c139238_g1,c140023_g1,c151047_g1,c151047_g2,c151047_g4,c154301_g2,c158643_g1,c161865_g1,c181634_g1,c197168_g1,c199516_g1,c199759_g1,c199794_g1,c201148_g1,c204369_g2,c206088_g1,c209207_g1,c210609_g1,c211285_g1,c212216_g1,c212216_g2,c21544_g1,c220308_g1,c221451_g4,c226869_g1,c228355_g2,c230462_g1,c231134_g6,c320611_g1,c35949_g1	BP	4.7e-10	1.96376e-09	33	60	8
GO:0046031	ADP metabolic process	c110032_g1,c110032_g2,c137211_g1,c139238_g1,c140023_g1,c151047_g1,c151047_g2,c151047_g4,c154301_g2,c158643_g1,c161865_g1,c181634_g1,c197168_g1,c199516_g1,c199759_g1,c199794_g1,c201148_g1,c204369_g2,c206088_g1,c209207_g1,c210609_g1,c211285_g1,c212216_g1,c212216_g2,c21544_g1,c220308_g1,c221451_g4,c226869_g1,c228355_g2,c230462_g1,c231134_g6,c320611_g1,c35949_g1	BP	4.7e-10	1.96376e-09	33	60	8
GO:0046939	nucleotide phosphorylation	c110032_g1,c110032_g2,c137211_g1,c139238_g1,c140023_g1,c151047_g1,c151047_g2,c151047_g4,c154301_g2,c158643_g1,c161865_g1,c181634_g1,c197168_g1,c199516_g1,c199759_g1,c199794_g1,c201148_g1,c204369_g2,c206088_g1,c209207_g1,c210609_g1,c211285_g1,c212216_g1,c212216_g2,c21544_g1,c220308_g1,c221451_g4,c226869_g1,c228355_g2,c230462_g1,c231134_g6,c320611_g1,c35949_g1	BP	4.7e-10	1.96376e-09	33	60	7
GO:1901292	nucleoside phosphate catabolic process	c110032_g1,c110032_g2,c137211_g1,c139238_g1,c140023_g1,c151047_g1,c151047_g2,c151047_g4,c154301_g2,c158643_g1,c161865_g1,c181634_g1,c197168_g1,c199516_g1,c199759_g1,c199794_g1,c201148_g1,c204369_g2,c206088_g1,c209207_g1,c210609_g1,c211285_g1,c212216_g1,c212216_g2,c21544_g1,c220308_g1,c221451_g4,c226869_g1,c228355_g2,c230462_g1,c231134_g6,c320611_g1,c35949_g1	BP	4.7e-10	1.96376e-09	33	60	6
GO:1901137	carbohydrate derivative biosynthetic process	c108853_g1,c110032_g1,c110032_g2,c130202_g1,c131861_g1,c137211_g1,c139238_g1,c140023_g1,c146942_g1,c151047_g1,c151047_g2,c151047_g4,c153259_g1,c154301_g2,c158643_g1,c160544_g1,c161865_g1,c162291_g1,c169523_g1,c173745_g1,c175926_g1,c181634_g1,c185357_g1,c185622_g1,c197145_g1,c197168_g1,c197661_g1,c198040_g1,c198069_g1,c198119_g3,c198703_g1,c199516_g1,c199759_g1,c199794_g1,c200306_g1,c200690_g1,c20…	BP	5.4e-10	1.99895e-09	82	227	5
GO:0072524	pyridine-containing compound metabolic process	c110032_g1,c110032_g2,c137211_g1,c139238_g1,c140023_g1,c148213_g1,c151047_g1,c151047_g2,c151047_g4,c154301_g2,c158643_g1,c161865_g1,c181634_g1,c190639_g1,c197168_g1,c198928_g1,c199516_g1,c199759_g1,c199794_g1,c201148_g1,c204369_g2,c206088_g1,c209207_g1,c209751_g2,c210398_g1,c210609_g1,c211285_g1,c212216_g1,c212216_g2,c21544_g1,c220308_g1,c221451_g4,c226869_g1,c228355_g2,c230462_g1,c230576_g2,c231…	BP	7.1e-10	2.58293e-09	43	91	5
GO:1901135	carbohydrate derivative metabolic process	c108853_g1,c110032_g1,c110032_g2,c130202_g1,c131861_g1,c137211_g1,c139238_g1,c140023_g1,c146942_g1,c148213_g1,c151047_g1,c151047_g2,c151047_g4,c153259_g1,c154301_g2,c158643_g1,c160544_g1,c161865_g1,c162291_g1,c169523_g1,c173745_g1,c175926_g1,c181634_g1,c185357_g1,c185622_g1,c197145_g1,c197168_g1,c197661_g1,c198040_g1,c198069_g1,c198119_g3,c198703_g1,c198928_g1,c199516_g1,c199759_g1,c199794_g1,c20…	BP	1e-09	3.57627e-09	91	264	4
GO:0046434	organophosphate catabolic process	c110032_g1,c110032_g2,c137211_g1,c139238_g1,c140023_g1,c151047_g1,c151047_g2,c151047_g4,c154301_g2,c158643_g1,c161865_g1,c181634_g1,c197168_g1,c199516_g1,c199759_g1,c199794_g1,c201148_g1,c204369_g2,c206088_g1,c209207_g1,c210609_g1,c211285_g1,c212216_g1,c212216_g2,c21544_g1,c220308_g1,c221451_g4,c226869_g1,c228355_g2,c230462_g1,c231134_g6,c320611_g1,c35949_g1	BP	1.5e-09	5.275e-09	33	62	5
GO:0019363	pyridine nucleotide biosynthetic process	c110032_g1,c110032_g2,c137211_g1,c139238_g1,c140023_g1,c151047_g1,c151047_g2,c151047_g4,c154301_g2,c158643_g1,c161865_g1,c181634_g1,c190639_g1,c197168_g1,c199516_g1,c199759_g1,c199794_g1,c201148_g1,c204369_g2,c206088_g1,c209207_g1,c209751_g2,c210609_g1,c211285_g1,c212216_g1,c212216_g2,c21544_g1,c220308_g1,c221451_g4,c226869_g1,c228355_g2,c230462_g1,c231134_g6,c320611_g1,c35949_g1	BP	4.2e-09	1.45279e-08	35	70	7
GO:0051186	cofactor metabolic process	c110032_g1,c110032_g2,c137211_g1,c137472_g1,c139238_g1,c140023_g1,c144434_g1,c146118_g2,c148213_g1,c148995_g2,c151047_g1,c151047_g2,c151047_g4,c154301_g2,c158643_g1,c159481_g1,c161865_g1,c162045_g1,c162045_g2,c170920_g1,c176328_g1,c177014_g1,c181634_g1,c186154_g1,c187223_g1,c187783_g1,c190639_g1,c197102_g1,c197168_g1,c197282_g1,c198703_g1,c198928_g1,c199516_g1,c199759_g1,c199794_g1,c201148_g1,c20…	BP	4.6e-09	1.56548e-08	92	275	4
GO:0019359	nicotinamide nucleotide biosynthetic process	c110032_g1,c110032_g2,c137211_g1,c139238_g1,c140023_g1,c151047_g1,c151047_g2,c151047_g4,c154301_g2,c158643_g1,c161865_g1,c181634_g1,c197168_g1,c199516_g1,c199759_g1,c199794_g1,c201148_g1,c204369_g2,c206088_g1,c209207_g1,c209751_g2,c210609_g1,c211285_g1,c212216_g1,c212216_g2,c21544_g1,c220308_g1,c221451_g4,c226869_g1,c228355_g2,c230462_g1,c231134_g6,c320611_g1,c35949_g1	BP	7.1e-09	2.37794e-08	34	68	8
GO:0009108	coenzyme biosynthetic process	c110032_g1,c110032_g2,c137211_g1,c137472_g1,c139238_g1,c140023_g1,c151047_g1,c151047_g2,c151047_g4,c154301_g2,c158643_g1,c161865_g1,c170920_g1,c176328_g1,c181634_g1,c186154_g1,c190639_g1,c197168_g1,c198703_g1,c199516_g1,c199759_g1,c199794_g1,c201148_g1,c203633_g1,c204369_g2,c204415_g1,c205182_g1,c206088_g1,c208759_g1,c209207_g1,c209751_g2,c210609_g1,c211285_g1,c212216_g1,c212216_g2,c213917_g5,c21…	BP	1.7e-08	5.60469e-08	54	137	6
GO:0072525	pyridine-containing compound biosynthetic process	c110032_g1,c110032_g2,c137211_g1,c139238_g1,c140023_g1,c151047_g1,c151047_g2,c151047_g4,c154301_g2,c158643_g1,c161865_g1,c181634_g1,c190639_g1,c197168_g1,c199516_g1,c199759_g1,c199794_g1,c201148_g1,c204369_g2,c206088_g1,c209207_g1,c209751_g2,c210609_g1,c211285_g1,c212216_g1,c212216_g2,c21544_g1,c220308_g1,c221451_g4,c226869_g1,c228355_g2,c230462_g1,c231134_g6,c302597_g1,c320611_g1,c35949_g1	BP	2.5e-08	8.11538e-08	36	77	6
GO:0006090	pyruvate metabolic process	c110032_g1,c110032_g2,c137211_g1,c139238_g1,c140023_g1,c151047_g1,c151047_g2,c151047_g4,c154301_g2,c158643_g1,c161865_g1,c181634_g1,c197168_g1,c199516_g1,c199759_g1,c199794_g1,c201148_g1,c204369_g2,c206088_g1,c209207_g1,c210609_g1,c211285_g1,c212216_g1,c212216_g2,c21544_g1,c220308_g1,c221451_g4,c226869_g1,c228355_g2,c230462_g1,c231134_g6,c320611_g1,c35949_g1	BP	4.8e-08	1.53455e-07	33	69	8
GO:0034655	nucleobase-containing compound catabolic process	c110032_g1,c110032_g2,c137211_g1,c139238_g1,c140023_g1,c151047_g1,c151047_g2,c151047_g4,c154301_g2,c158643_g1,c161865_g1,c176832_g1,c177576_g1,c181634_g1,c195113_g1,c196760_g1,c197168_g1,c199516_g1,c199759_g1,c199794_g1,c201148_g1,c204369_g2,c206088_g1,c209207_g1,c210609_g1,c211285_g1,c212216_g1,c212216_g2,c21544_g1,c220308_g1,c221451_g4,c226869_g1,c228355_g2,c229559_g4,c230462_g1,c231134_g6,c302…	BP	8.7e-08	2.73985e-07	39	90	5
GO:0019637	organophosphate metabolic process	c110032_g1,c110032_g2,c137211_g1,c139238_g1,c140023_g1,c146942_g1,c148213_g1,c151047_g1,c151047_g2,c151047_g4,c153259_g1,c154301_g2,c158643_g1,c160544_g1,c161865_g1,c162291_g1,c169523_g1,c173745_g1,c180629_g1,c181634_g1,c185622_g1,c186154_g1,c190282_g2,c190639_g1,c197145_g1,c197168_g1,c197267_g1,c198040_g1,c198069_g1,c198119_g3,c198703_g1,c198928_g1,c199516_g1,c199759_g1,c199794_g1,c201148_g1,c20…	BP	2.2e-07	6.82647e-07	86	271	4
GO:0019439	aromatic compound catabolic process	c110032_g1,c110032_g2,c137211_g1,c139238_g1,c140023_g1,c151047_g1,c151047_g2,c151047_g4,c153099_g1,c154301_g2,c158643_g1,c161865_g1,c176832_g1,c177576_g1,c181634_g1,c195113_g1,c196760_g1,c197168_g1,c199516_g1,c199759_g1,c199794_g1,c201148_g1,c204100_g1,c204369_g2,c206088_g1,c209207_g1,c210609_g1,c211285_g1,c212216_g1,c212216_g2,c21544_g1,c220308_g1,c221451_g4,c226869_g1,c228355_g2,c229559_g4,c230…	BP	7.6e-07	2.32406e-06	42	107	5
GO:0044270	cellular nitrogen compound catabolic process	c110032_g1,c110032_g2,c137211_g1,c139238_g1,c140023_g1,c151047_g1,c151047_g2,c151047_g4,c153099_g1,c154301_g2,c158643_g1,c161865_g1,c176832_g1,c177576_g1,c181634_g1,c195113_g1,c196760_g1,c197168_g1,c199516_g1,c199759_g1,c199794_g1,c201148_g1,c204100_g1,c204369_g2,c206088_g1,c209207_g1,c210609_g1,c211285_g1,c212216_g1,c212216_g2,c21544_g1,c220308_g1,c221451_g4,c226869_g1,c228355_g2,c229559_g4,c230…	BP	1.2e-06	3.61714e-06	41	105	5
GO:0046700	heterocycle catabolic process	c110032_g1,c110032_g2,c137211_g1,c139238_g1,c140023_g1,c151047_g1,c151047_g2,c151047_g4,c153099_g1,c154301_g2,c158643_g1,c161865_g1,c176832_g1,c177576_g1,c181634_g1,c195113_g1,c196760_g1,c197168_g1,c199516_g1,c199759_g1,c199794_g1,c201148_g1,c204100_g1,c204369_g2,c206088_g1,c209207_g1,c210609_g1,c211285_g1,c212216_g1,c212216_g2,c21544_g1,c220308_g1,c221451_g4,c226869_g1,c228355_g2,c229559_g4,c230…	BP	2.2e-06	6.53803e-06	41	107	5
GO:0051188	cofactor biosynthetic process	c110032_g1,c110032_g2,c137211_g1,c137472_g1,c139238_g1,c140023_g1,c151047_g1,c151047_g2,c151047_g4,c154301_g2,c158643_g1,c161865_g1,c170920_g1,c176328_g1,c181634_g1,c186154_g1,c187223_g1,c190639_g1,c197168_g1,c198703_g1,c199516_g1,c199759_g1,c199794_g1,c201148_g1,c203633_g1,c204369_g2,c204415_g1,c205182_g1,c206088_g1,c206193_g1,c208759_g1,c209207_g1,c209751_g2,c210609_g1,c211285_g1,c212216_g1,c21…	BP	2.7e-06	7.9125e-06	60	180	5
GO:0090407	organophosphate biosynthetic process	c110032_g1,c110032_g2,c137211_g1,c139238_g1,c140023_g1,c146942_g1,c151047_g1,c151047_g2,c151047_g4,c153259_g1,c154301_g2,c158643_g1,c160544_g1,c161865_g1,c162291_g1,c169523_g1,c173745_g1,c180629_g1,c181634_g1,c185622_g1,c186154_g1,c190639_g1,c197145_g1,c197168_g1,c198040_g1,c198069_g1,c198119_g3,c198703_g1,c199516_g1,c199759_g1,c199794_g1,c201148_g1,c201150_g1,c204298_g1,c204369_g2,c204415_g1,c20…	BP	3.8e-06	1.09836e-05	73	234	5
GO:0044283	small molecule biosynthetic process	c102055_g1,c108834_g2,c110032_g1,c110032_g2,c130388_g1,c131317_g1,c137211_g1,c137472_g1,c137532_g1,c137532_g2,c139238_g1,c140023_g1,c144184_g1,c148262_g1,c151047_g1,c151047_g2,c151047_g4,c153259_g1,c154301_g2,c156181_g1,c158031_g1,c158643_g1,c161865_g1,c162291_g1,c162455_g1,c170920_g1,c173745_g1,c173863_g1,c174467_g1,c176328_g1,c176474_g1,c178792_g1,c181634_g1,c182497_g1,c184713_g1,c185526_g1,c18…	BP	3.9e-06	1.11203e-05	119	430	4
GO:1901361	organic cyclic compound catabolic process	c110032_g1,c110032_g2,c137211_g1,c139238_g1,c140023_g1,c151047_g1,c151047_g2,c151047_g4,c153099_g1,c154301_g2,c158643_g1,c161865_g1,c176832_g1,c177576_g1,c181634_g1,c195113_g1,c196760_g1,c197168_g1,c199516_g1,c199759_g1,c199794_g1,c201148_g1,c204100_g1,c204369_g2,c206088_g1,c209207_g1,c210609_g1,c211285_g1,c212216_g1,c212216_g2,c21544_g1,c220308_g1,c221451_g4,c226869_g1,c228355_g2,c229559_g4,c230…	BP	5.3e-06	1.49107e-05	42	114	5
GO:0016052	carbohydrate catabolic process	c110032_g1,c110032_g2,c130963_g1,c137211_g1,c139238_g1,c140023_g1,c151047_g1,c151047_g2,c151047_g4,c154301_g2,c158643_g1,c160967_g1,c161865_g1,c181261_g1,c181634_g1,c193411_g2,c197168_g1,c199516_g1,c199759_g1,c199794_g1,c199857_g1,c201148_g1,c204369_g2,c205205_g1,c206088_g1,c207990_g1,c207990_g2,c209207_g1,c210282_g2,c210609_g1,c211032_g1,c211285_g1,c212216_g1,c212216_g2,c215382_g1,c215382_g2,c21…	BP	9.5e-06	2.6375e-05	49	143	5
GO:0005975	carbohydrate metabolic process	c10609_g1,c110032_g1,c110032_g2,c130963_g1,c131861_g1,c137211_g1,c139238_g1,c139430_g1,c140023_g1,c146940_g1,c151047_g1,c151047_g2,c151047_g4,c154301_g2,c158643_g1,c160967_g1,c160988_g1,c161197_g1,c161865_g1,c167071_g1,c170920_g1,c173863_g1,c176736_g1,c181035_g1,c181261_g1,c181634_g1,c184713_g1,c186381_g1,c193411_g2,c193921_g1,c196911_g1,c197009_g1,c197168_g1,c198928_g1,c199516_g1,c199759_g1,c199…	BP	1.3e-05	3.56234e-05	102	365	4
GO:1901566	organonitrogen compound biosynthetic process	c102055_g1,c108834_g2,c108853_g1,c110032_g1,c110032_g2,c128775_g1,c130202_g1,c136954_g1,c137211_g1,c137472_g1,c137532_g1,c137532_g2,c137676_g1,c139238_g1,c140023_g1,c146942_g1,c151047_g1,c151047_g2,c151047_g4,c153206_g1,c153259_g1,c154301_g2,c156181_g1,c158031_g1,c158643_g1,c160544_g1,c161151_g1,c161865_g1,c162291_g1,c169523_g1,c171330_g2,c171330_g3,c173745_g1,c174467_g1,c174574_g1,c176474_g1,c17…	BP	1.7e-05	4.59872e-05	158	619	5
GO:1901564	organonitrogen compound metabolic process	c100976_g1,c102055_g1,c103118_g1,c108834_g2,c108853_g1,c108871_g1,c110032_g1,c110032_g2,c126236_g1,c128775_g1,c130202_g1,c131348_g1,c136954_g1,c137211_g1,c137472_g1,c137532_g1,c137532_g2,c137676_g1,c139238_g1,c140023_g1,c144222_g1,c144266_g1,c144434_g1,c146942_g1,c148213_g1,c149557_g1,c150469_g1,c151047_g1,c151047_g2,c151047_g4,c153099_g1,c153206_g1,c153259_g1,c154301_g2,c154790_g1,c156181_g1,c15…	BP	2e-05	5.34177e-05	341	1497	4
GO:0044248	cellular catabolic process	c110032_g1,c110032_g2,c130963_g1,c137211_g1,c139238_g1,c140023_g1,c146118_g2,c148995_g2,c150469_g1,c151047_g1,c151047_g2,c151047_g4,c153099_g1,c154301_g2,c157250_g1,c158643_g1,c161865_g1,c176832_g1,c177014_g1,c177576_g1,c181261_g1,c181634_g1,c186285_g1,c187939_g1,c193411_g2,c195113_g1,c195963_g1,c196760_g1,c197168_g1,c197282_g1,c199516_g1,c199759_g1,c199794_g1,c199857_g1,c201148_g1,c204100_g1,c20…	BP	2.9e-05	7.64875e-05	83	289	4
GO:0006508	proteolysis	c100976_g1,c108871_g1,c144266_g1,c149557_g1,c154790_g1,c156247_g1,c169578_g1,c169674_g1,c176154_g3,c176172_g2,c177087_g1,c184669_g1,c184727_g1,c186285_g1,c186467_g1,c187091_g1,c190578_g1,c190594_g1,c190607_g1,c192811_g1,c194503_g1,c195598_g1,c195685_g1,c199102_g1,c199404_g1,c199799_g1,c199822_g1,c199822_g2,c200094_g1,c203335_g1,c204933_g1,c205298_g1,c205586_g1,c205616_g1,c206019_g1,c206475_g1,c20…	BP	3.9e-05	0.000101593	102	374	5
GO:0006099	tricarboxylic acid cycle	c148313_g1,c149524_g1,c154738_g1,c174815_g1,c177014_g1,c179932_g1,c183933_g1,c186306_g3,c190716_g1,c208697_g1,c211423_g1,c213599_g2,c219549_g1,c219549_g2,c226961_g4,c232236_g3,c39850_g1	BP	4.4e-05	0.000111186	17	34	4
GO:0006101	citrate metabolic process	c148313_g1,c149524_g1,c154738_g1,c174815_g1,c177014_g1,c179932_g1,c183933_g1,c186306_g3,c190716_g1,c208697_g1,c211423_g1,c213599_g2,c219549_g1,c219549_g2,c226961_g4,c232236_g3,c39850_g1	BP	4.4e-05	0.000111186	17	34	8
GO:0009060	aerobic respiration	c148313_g1,c149524_g1,c154738_g1,c174815_g1,c177014_g1,c179932_g1,c183933_g1,c186306_g3,c190716_g1,c208697_g1,c211423_g1,c213599_g2,c219549_g1,c219549_g2,c226961_g4,c232236_g3,c39850_g1	BP	4.4e-05	0.000111186	17	34	6
GO:0072350	tricarboxylic acid metabolic process	c148313_g1,c149524_g1,c154738_g1,c174815_g1,c177014_g1,c179932_g1,c183933_g1,c186306_g3,c190716_g1,c208697_g1,c211423_g1,c213599_g2,c219549_g1,c219549_g2,c226961_g4,c232236_g3,c39850_g1	BP	4.4e-05	0.000111186	17	34	7
GO:0015980	energy derivation by oxidation of organic compounds	c148313_g1,c149524_g1,c154738_g1,c174815_g1,c177014_g1,c179932_g1,c183933_g1,c186306_g3,c190716_g1,c208697_g1,c211423_g1,c213599_g2,c219549_g1,c219549_g2,c226961_g4,c232236_g3,c39850_g1	BP	7e-05	0.000170751	17	35	4
GO:0045333	cellular respiration	c148313_g1,c149524_g1,c154738_g1,c174815_g1,c177014_g1,c179932_g1,c183933_g1,c186306_g3,c190716_g1,c208697_g1,c211423_g1,c213599_g2,c219549_g1,c219549_g2,c226961_g4,c232236_g3,c39850_g1	BP	7e-05	0.000170751	17	35	5
GO:0005996	monosaccharide metabolic process	c110032_g1,c110032_g2,c131861_g1,c170920_g1,c181035_g1,c184713_g1,c196911_g1,c199794_g1,c2005_g1,c206088_g1,c206441_g3,c210398_g1,c212088_g1,c212216_g1,c212216_g2,c217361_g1,c217361_g2,c217836_g1,c227698_g1,c230576_g2,c27016_g1	BP	7.1e-05	0.000170239	21	48	4
GO:0016053	organic acid biosynthetic process	c102055_g1,c110032_g1,c110032_g2,c130388_g1,c131317_g1,c137211_g1,c137472_g1,c137532_g1,c137532_g2,c139238_g1,c140023_g1,c144184_g1,c148262_g1,c151047_g1,c151047_g2,c151047_g4,c153259_g1,c154301_g2,c158031_g1,c158643_g1,c161865_g1,c162455_g1,c170920_g1,c176328_g1,c176474_g1,c178792_g1,c181634_g1,c182497_g1,c185526_g1,c185968_g1,c197168_g1,c198415_g1,c199516_g1,c199759_g1,c199794_g1,c201148_g1,c20…	BP	0.00011	0.00025933	95	352	5
GO:0046394	carboxylic acid biosynthetic process	c102055_g1,c110032_g1,c110032_g2,c130388_g1,c131317_g1,c137211_g1,c137472_g1,c137532_g1,c137532_g2,c139238_g1,c140023_g1,c144184_g1,c148262_g1,c151047_g1,c151047_g2,c151047_g4,c153259_g1,c154301_g2,c158031_g1,c158643_g1,c161865_g1,c162455_g1,c170920_g1,c176328_g1,c176474_g1,c178792_g1,c181634_g1,c182497_g1,c185526_g1,c185968_g1,c197168_g1,c198415_g1,c199516_g1,c199759_g1,c199794_g1,c201148_g1,c20…	BP	0.00011	0.00025933	95	352	6
GO:0055114	oxidation-reduction process	c102274_g1,c108880_g1,c126221_g1,c130388_g1,c130963_g1,c131273_g1,c131317_g1,c131737_g1,c131842_g1,c136974_g1,c137211_g1,c138498_g1,c139238_g1,c139430_g1,c144434_g1,c144571_g1,c146118_g2,c148313_g1,c148365_g1,c148995_g2,c149524_g1,c153995_g1,c154738_g1,c160340_g1,c161071_g1,c162455_g1,c162704_g1,c162781_g1,c169632_g1,c170920_g1,c171525_g1,c174815_g1,c177014_g1,c178604_g1,c179932_g1,c180600_g1,c18…	BP	0.00017	0.000394176	198	834	3
GO:0019318	hexose metabolic process	c110032_g1,c110032_g2,c131861_g1,c181035_g1,c184713_g1,c196911_g1,c199794_g1,c2005_g1,c206088_g1,c206441_g3,c212088_g1,c212216_g1,c212216_g2,c227698_g1,c230576_g2,c27016_g1	BP	0.00018	0.000412826	16	34	5
GO:0071702	organic substance transport	c102060_g1,c109154_g1,c109515_g1,c125359_g1,c132005_g1,c132271_g1,c137010_g1,c137181_g1,c144062_g1,c146605_g1,c151769_g1,c156305_g1,c157250_g1,c157721_g1,c161062_g1,c161985_g1,c162657_g1,c162695_g1,c165956_g1,c169637_g1,c170129_g1,c173844_g1,c174612_g1,c175921_g1,c177576_g1,c179786_g1,c180810_g1,c180810_g2,c180879_g1,c183839_g1,c186430_g2,c186793_g2,c187773_g1,c187939_g1,c188034_g1,c188060_g1,c19…	BP	0.00021	0.000476452	144	582	5
GO:0032787	monocarboxylic acid metabolic process	c110032_g1,c110032_g2,c130388_g1,c137211_g1,c137472_g1,c139238_g1,c140023_g1,c144184_g1,c148262_g1,c151047_g1,c151047_g2,c151047_g4,c154301_g2,c158643_g1,c161865_g1,c162455_g1,c169632_g1,c176328_g1,c180363_g1,c181634_g1,c185526_g1,c185968_g1,c187939_g1,c188049_g1,c196877_g1,c197168_g1,c197329_g1,c199516_g1,c199759_g1,c199794_g1,c201148_g1,c204317_g1,c204369_g2,c206088_g1,c207198_g1,c209207_g1,c20…	BP	0.00029	0.000650957	75	272	7
GO:1901657	glycosyl compound metabolic process	c153259_g1,c162291_g1,c173745_g1,c175926_g1,c197145_g1,c198119_g3,c200306_g1,c208395_g1,c217065_g1,c224117_g2,c224117_g8,c225822_g3,c229271_g9	BP	0.00035	0.000773298	13	26	5
GO:1901659	glycosyl compound biosynthetic process	c153259_g1,c162291_g1,c173745_g1,c175926_g1,c197145_g1,c198119_g3,c200306_g1,c208395_g1,c217065_g1,c224117_g2,c224117_g8,c225822_g3,c229271_g9	BP	0.00035	0.000773298	13	26	6
GO:1901575	organic substance catabolic process	c110032_g1,c110032_g2,c130963_g1,c137211_g1,c139238_g1,c140023_g1,c148406_g1,c150469_g1,c151047_g1,c151047_g2,c151047_g4,c153099_g1,c154301_g2,c154678_g1,c158643_g1,c160967_g1,c161865_g1,c171188_g1,c176832_g1,c177014_g1,c177576_g1,c181261_g1,c181634_g1,c186285_g1,c187939_g1,c193411_g2,c195113_g1,c195963_g1,c196760_g1,c197168_g1,c197371_g1,c199516_g1,c199759_g1,c199794_g1,c199857_g1,c201148_g1,c20…	BP	0.00041	0.000891856	82	306	4
GO:0009056	catabolic process	c110032_g1,c110032_g2,c130963_g1,c137211_g1,c139238_g1,c140023_g1,c146118_g2,c148406_g1,c148995_g2,c150469_g1,c151047_g1,c151047_g2,c151047_g4,c153099_g1,c154301_g2,c154678_g1,c157250_g1,c158643_g1,c160967_g1,c161865_g1,c171188_g1,c176832_g1,c177014_g1,c177576_g1,c181261_g1,c181634_g1,c186285_g1,c187939_g1,c193411_g2,c195113_g1,c195963_g1,c196760_g1,c197168_g1,c197282_g1,c197371_g1,c199516_g1,c19…	BP	0.00108	0.00232531	93	365	3
GO:0006575	cellular modified amino acid metabolic process	c137472_g1,c144434_g1,c159481_g1,c162045_g1,c162045_g2,c187783_g1,c203633_g1,c204415_g1,c205001_g1,c209171_g1,c211109_g1,c214371_g7,c222769_g1,c222769_g2,c226165_g1,c250059_g1	BP	0.0012	0.00255758	16	39	4
GO:0042726	flavin-containing compound metabolic process	c108834_g2,c174467_g1,c186154_g1,c198703_g1,c207742_g1,c228647_g3,c228671_g1,c229947_g1	BP	0.00169	0.0035659	8	14	5
GO:0006006	glucose metabolic process	c110032_g1,c110032_g2,c184713_g1,c199794_g1,c2005_g1,c206088_g1,c212216_g1,c212216_g2,c230576_g2,c27016_g1	BP	0.00172	0.00359327	10	20	6
GO:0072330	monocarboxylic acid biosynthetic process	c110032_g1,c110032_g2,c130388_g1,c137211_g1,c137472_g1,c139238_g1,c140023_g1,c144184_g1,c148262_g1,c151047_g1,c151047_g2,c151047_g4,c154301_g2,c158643_g1,c161865_g1,c162455_g1,c176328_g1,c181634_g1,c185526_g1,c185968_g1,c197168_g1,c199516_g1,c199759_g1,c199794_g1,c201148_g1,c204317_g1,c204369_g2,c206088_g1,c207198_g1,c209207_g1,c210609_g1,c211285_g1,c212216_g1,c212216_g2,c215042_g1,c21544_g1,c217…	BP	0.00185	0.00382696	53	191	7
GO:0006520	cellular amino acid metabolic process	c102055_g1,c137532_g1,c137532_g2,c150469_g1,c153099_g1,c153259_g1,c158031_g1,c176474_g1,c177014_g1,c178792_g1,c182497_g1,c195963_g1,c197102_g1,c198415_g1,c201346_g1,c204438_g1,c209049_g1,c209518_g2,c210032_g1,c210299_g3,c210802_g1,c211330_g2,c213930_g2,c214135_g1,c214371_g7,c214371_g9,c214651_g1,c215659_g1,c216074_g3,c216473_g2,c217180_g1,c217912_g1,c221591_g5,c224199_g3,c224995_g1,c225949_g1,c22…	BP	0.00202	0.00413806	48	170	4
GO:0008643	carbohydrate transport	c137181_g1,c146605_g1,c186430_g2,c190442_g1,c190498_g1,c193467_g1,c194778_g1,c196889_g1,c196920_g2,c204352_g2,c205077_g1,c210216_g1,c210373_g1,c210413_g1,c211620_g2,c211826_g2,c214036_g2,c220277_g2,c221409_g1,c221704_g1,c223232_g1,c224817_g3,c226103_g2,c228454_g2,c229896_g2,c231497_g1,c231884_g1,c232424_g1,c321102_g1	BP	0.00267	0.00541702	29	92	6
GO:0015977	carbon fixation	c139430_g1,c146940_g1,c180616_g1,c180616_g2,c186381_g1,c198928_g1,c208396_g1,c208396_g2,c249877_g1,c73497_g1	BP	0.00273	0.005486	10	21	4
GO:0019395	fatty acid oxidation	c187939_g1,c188049_g1,c209581_g1,c213849_g1,c221650_g3,c221650_g4,c230856_g4	BP	0.00286	0.00566629	7	12	5
GO:0034440	lipid oxidation	c187939_g1,c188049_g1,c209581_g1,c213849_g1,c221650_g3,c221650_g4,c230856_g4	BP	0.00286	0.00566629	7	12	4
GO:0098656	anion transmembrane transport	c193467_g1,c205077_g1,c210373_g1,c210413_g1,c223232_g1,c225965_g1,c228671_g1,c250820_g1,c90267_g1	BP	0.00293	0.00572435	9	18	7
GO:1901605	alpha-amino acid metabolic process	c137532_g1,c137532_g2,c150469_g1,c153099_g1,c153259_g1,c158031_g1,c176474_g1,c177014_g1,c178792_g1,c182497_g1,c195963_g1,c197102_g1,c198415_g1,c201346_g1,c204438_g1,c209049_g1,c209518_g2,c210299_g3,c210802_g1,c211330_g2,c213930_g2,c214135_g1,c214371_g7,c214371_g9,c214651_g1,c215659_g1,c216074_g3,c216473_g2,c224199_g3,c224995_g1,c225949_g1,c225965_g1,c228200_g2,c232271_g1,c232311_g1,c232320_g1,c24…	BP	0.0037	0.00716239	43	153	5
GO:0009116	nucleoside metabolic process	c153259_g1,c162291_g1,c173745_g1,c197145_g1,c198119_g3,c208395_g1,c217065_g1,c224117_g2,c224117_g8,c225822_g3	BP	0.00416	0.00780231	10	22	5
GO:0009119	ribonucleoside metabolic process	c153259_g1,c162291_g1,c173745_g1,c197145_g1,c198119_g3,c208395_g1,c217065_g1,c224117_g2,c224117_g8,c225822_g3	BP	0.00416	0.00780231	10	22	6
GO:0009163	nucleoside biosynthetic process	c153259_g1,c162291_g1,c173745_g1,c197145_g1,c198119_g3,c208395_g1,c217065_g1,c224117_g2,c224117_g8,c225822_g3	BP	0.00416	0.00780231	10	22	6
GO:0042455	ribonucleoside biosynthetic process	c153259_g1,c162291_g1,c173745_g1,c197145_g1,c198119_g3,c208395_g1,c217065_g1,c224117_g2,c224117_g8,c225822_g3	BP	0.00416	0.00780231	10	22	7
GO:0046364	monosaccharide biosynthetic process	c110032_g1,c110032_g2,c170920_g1,c184713_g1,c199794_g1,c206088_g1,c212216_g1,c212216_g2,c217361_g1,c217361_g2	BP	0.00416	0.00780231	10	22	5
GO:0046653	tetrahydrofolate metabolic process	c144434_g1,c159481_g1,c162045_g1,c162045_g2,c203633_g1,c204415_g1,c205001_g1,c209171_g1,c211109_g1,c214371_g7	BP	0.00416	0.00780231	10	22	6
GO:0006098	pentose-phosphate shunt	c148213_g1,c198928_g1,c199794_g1,c210398_g1,c230576_g2,c267178_g1,c27016_g1,c58352_g1	BP	0.00504	0.0090122	8	16	#N/A
GO:0006739	NADP metabolic process	c148213_g1,c198928_g1,c199794_g1,c210398_g1,c230576_g2,c267178_g1,c27016_g1,c58352_g1	BP	0.00504	0.0090122	8	16	8
GO:0019253	reductive pentose-phosphate cycle	c139430_g1,c146940_g1,c186381_g1,c198928_g1,c208396_g1,c208396_g2,c249877_g1,c73497_g1	BP	0.00504	0.0090122	8	16	5
GO:0019685	photosynthesis, dark reaction	c139430_g1,c146940_g1,c186381_g1,c198928_g1,c208396_g1,c208396_g2,c249877_g1,c73497_g1	BP	0.00504	0.0090122	8	16	5
GO:0051156	glucose 6-phosphate metabolic process	c148213_g1,c198928_g1,c199794_g1,c210398_g1,c230576_g2,c267178_g1,c27016_g1,c58352_g1	BP	0.00504	0.0090122	8	16	5
GO:0006167	AMP biosynthetic process	c162291_g1,c173745_g1,c198069_g1,c208395_g1	BP	0.00553	0.00956418	4	5	6
GO:0046033	AMP metabolic process	c162291_g1,c173745_g1,c198069_g1,c208395_g1	BP	0.00553	0.00956418	4	5	5
GO:0055078	sodium ion homeostasis	c130240_g1,c156305_g1,c213209_g1,c213209_g3	BP	0.00553	0.00956418	4	5	9
GO:0009064	glutamine family amino acid metabolic process	c153259_g1,c197102_g1,c211330_g2,c214371_g7,c214371_g9,c214651_g1,c216074_g3,c216473_g2,c224199_g3,c224995_g1,c225965_g1,c228200_g2,c232271_g1,c249904_g1,c250820_g1,c250931_g1,c90267_g1	BP	0.00685	0.011656	17	49	6
GO:0015729	oxaloacetate transport	c225965_g1,c250820_g1,c90267_g1	BP	0.00687	0.0111078	3	3	10
GO:0015740	C4-dicarboxylate transport	c225965_g1,c250820_g1,c90267_g1	BP	0.00687	0.0111078	3	3	9
GO:0015743	malate transport	c225965_g1,c250820_g1,c90267_g1	BP	0.00687	0.0111078	3	3	10
GO:0016098	monoterpenoid metabolic process	c175926_g1,c200306_g1,c229271_g9	BP	0.00687	0.0111078	3	3	7
GO:0016099	monoterpenoid biosynthetic process	c175926_g1,c200306_g1,c229271_g9	BP	0.00687	0.0111078	3	3	7
GO:0019482	beta-alanine metabolic process	c210032_g1,c217180_g1,c221591_g5	BP	0.00687	0.0111078	3	3	5
GO:0019483	beta-alanine biosynthetic process	c210032_g1,c217180_g1,c221591_g5	BP	0.00687	0.0111078	3	3	6
GO:0042136	neurotransmitter biosynthetic process	c210032_g1,c217180_g1,c221591_g5	BP	0.00687	0.0111078	3	3	5
GO:0071423	malate transmembrane transport	c225965_g1,c250820_g1,c90267_g1	BP	0.00687	0.0111078	3	3	8
GO:0072387	flavin adenine dinucleotide metabolic process	c186154_g1,c228671_g1,c229947_g1	BP	0.00687	0.0111078	3	3	6
GO:1900992	(-)-secologanin metabolic process	c175926_g1,c200306_g1,c229271_g9	BP	0.00687	0.0111078	3	3	5
GO:1900994	(-)-secologanin biosynthetic process	c175926_g1,c200306_g1,c229271_g9	BP	0.00687	0.0111078	3	3	6
GO:0016999	antibiotic metabolic process	c146118_g2,c148313_g1,c148995_g2,c149524_g1,c154738_g1,c174815_g1,c177014_g1,c179932_g1,c183933_g1,c186306_g3,c190716_g1,c197282_g1,c208697_g1,c211423_g1,c213599_g2,c219549_g1,c219549_g2,c222871_g8,c226961_g4,c228671_g1,c232236_g3,c249955_g1,c267132_g1,c39850_g1,c43348_g1	BP	0.00688	0.0105962	25	81	5
GO:0042278	purine nucleoside metabolic process	c162291_g1,c173745_g1,c208395_g1,c224117_g2,c224117_g8	BP	0.0083	0.0124648	5	8	6
GO:0042451	purine nucleoside biosynthetic process	c162291_g1,c173745_g1,c208395_g1,c224117_g2,c224117_g8	BP	0.0083	0.0124648	5	8	7
GO:0046128	purine ribonucleoside metabolic process	c162291_g1,c173745_g1,c208395_g1,c224117_g2,c224117_g8	BP	0.0083	0.0124648	5	8	7
GO:0046129	purine ribonucleoside biosynthetic process	c162291_g1,c173745_g1,c208395_g1,c224117_g2,c224117_g8	BP	0.0083	0.0124648	5	8	8
GO:1903825	organic acid transmembrane transport	c193467_g1,c210373_g1,c225965_g1,c250820_g1,c90267_g1	BP	0.0083	0.0124648	5	8	6
GO:1905039	carboxylic acid transmembrane transport	c193467_g1,c210373_g1,c225965_g1,c250820_g1,c90267_g1	BP	0.0083	0.0124648	5	8	7
GO:0006094	gluconeogenesis	c110032_g1,c110032_g2,c184713_g1,c199794_g1,c206088_g1,c212216_g1,c212216_g2	BP	0.0087	0.0127038	7	14	7
GO:0019319	hexose biosynthetic process	c110032_g1,c110032_g2,c184713_g1,c199794_g1,c206088_g1,c212216_g1,c212216_g2	BP	0.0087	0.0127038	7	14	6
GO:0006760	folic acid-containing compound metabolic process	c144434_g1,c159481_g1,c162045_g1,c162045_g2,c203633_g1,c204415_g1,c205001_g1,c209171_g1,c211109_g1,c214371_g7	BP	0.00873	0.0126166	10	24	5
GO:0006635	fatty acid beta-oxidation	c187939_g1,c209581_g1,c213849_g1,c221650_g3,c221650_g4,c230856_g4	BP	0.00901	0.0128889	6	11	6
GO:0009062	fatty acid catabolic process	c187939_g1,c209581_g1,c213849_g1,c221650_g3,c221650_g4,c230856_g4	BP	0.00901	0.0128889	6	11	6
GO:0015031	protein transport	c102060_g1,c109154_g1,c109515_g1,c125359_g1,c132005_g1,c132271_g1,c137010_g1,c144062_g1,c151769_g1,c156305_g1,c157250_g1,c157721_g1,c161062_g1,c161985_g1,c162657_g1,c162695_g1,c165956_g1,c169637_g1,c170129_g1,c173844_g1,c174612_g1,c175921_g1,c180810_g1,c180810_g2,c180879_g1,c183839_g1,c187773_g1,c188034_g1,c188060_g1,c190185_g1,c190584_g1,c194668_g1,c197650_g1,c199584_g1,c201026_g1,c201053_g1,c20…	BP	0.0106	0.0149605	89	374	5
GO:0015833	peptide transport	c102060_g1,c109154_g1,c109515_g1,c125359_g1,c132005_g1,c132271_g1,c137010_g1,c144062_g1,c151769_g1,c156305_g1,c157250_g1,c157721_g1,c161062_g1,c161985_g1,c162657_g1,c162695_g1,c165956_g1,c169637_g1,c170129_g1,c173844_g1,c174612_g1,c175921_g1,c180810_g1,c180810_g2,c180879_g1,c183839_g1,c187773_g1,c188034_g1,c188060_g1,c190185_g1,c190584_g1,c194668_g1,c197650_g1,c199584_g1,c201026_g1,c201053_g1,c20…	BP	0.0106	0.0149605	89	374	6
GO:0016054	organic acid catabolic process	c150469_g1,c153099_g1,c177014_g1,c187939_g1,c195963_g1,c209581_g1,c210299_g3,c213849_g1,c221650_g3,c221650_g4,c230856_g4,c267302_g1	BP	0.01114	0.0154134	12	32	5
GO:0046395	carboxylic acid catabolic process	c150469_g1,c153099_g1,c177014_g1,c187939_g1,c195963_g1,c209581_g1,c210299_g3,c213849_g1,c221650_g3,c221650_g4,c230856_g4,c267302_g1	BP	0.01114	0.0154134	12	32	6
GO:0055065	metal ion homeostasis	c130240_g1,c156305_g1,c187199_g1,c203983_g1,c204916_g1,c206693_g1,c213209_g1,c213209_g3,c213633_g1,c224674_g5,c228561_g1,c87475_g1	BP	0.01114	0.0154134	12	32	8
GO:0055080	cation homeostasis	c130240_g1,c156305_g1,c187199_g1,c203983_g1,c204916_g1,c206693_g1,c213209_g1,c213209_g3,c213633_g1,c224674_g5,c228561_g1,c87475_g1	BP	0.01114	0.0154134	12	32	7
GO:0050801	ion homeostasis	c130240_g1,c156305_g1,c187199_g1,c203983_g1,c204916_g1,c206693_g1,c213209_g1,c213209_g3,c213633_g1,c224674_g5,c228561_g1,c229513_g4,c87475_g1	BP	0.01191	0.016213	13	36	6
GO:0042558	pteridine-containing compound metabolic process	c144434_g1,c159481_g1,c162045_g1,c162045_g2,c203633_g1,c204415_g1,c205001_g1,c209171_g1,c211109_g1,c214371_g7	BP	0.01212	0.0163931	10	25	5
GO:0033036	macromolecule localization	c102060_g1,c109154_g1,c109515_g1,c125359_g1,c132005_g1,c132271_g1,c137010_g1,c144062_g1,c151769_g1,c156305_g1,c157250_g1,c157721_g1,c161062_g1,c161985_g1,c162657_g1,c162695_g1,c165956_g1,c169637_g1,c170129_g1,c173844_g1,c174612_g1,c175921_g1,c177576_g1,c179786_g1,c180810_g1,c180810_g2,c180879_g1,c183839_g1,c187773_g1,c188034_g1,c188060_g1,c190185_g1,c190584_g1,c190717_g1,c194668_g1,c197650_g1,c19…	BP	0.01294	0.0173907	101	434	3
GO:0044282	small molecule catabolic process	c130963_g1,c150469_g1,c153099_g1,c177014_g1,c187939_g1,c195963_g1,c199857_g1,c209581_g1,c210299_g3,c213849_g1,c219304_g2,c221650_g3,c221650_g4,c230856_g4,c267302_g1,c302638_g1	BP	0.01302	0.0173875	16	48	4
GO:0042886	amide transport	c102060_g1,c109154_g1,c109515_g1,c125359_g1,c132005_g1,c132271_g1,c137010_g1,c144062_g1,c151769_g1,c156305_g1,c157250_g1,c157721_g1,c161062_g1,c161985_g1,c162657_g1,c162695_g1,c165956_g1,c169637_g1,c170129_g1,c173844_g1,c174612_g1,c175921_g1,c180810_g1,c180810_g2,c180879_g1,c183839_g1,c187773_g1,c188034_g1,c188060_g1,c190185_g1,c190584_g1,c194668_g1,c197650_g1,c199584_g1,c201026_g1,c201053_g1,c20…	BP	0.01311	0.0173975	89	377	6
GO:0071705	nitrogen compound transport	c102060_g1,c109154_g1,c109515_g1,c125359_g1,c132005_g1,c132271_g1,c137010_g1,c144062_g1,c151769_g1,c156305_g1,c157250_g1,c157721_g1,c161062_g1,c161985_g1,c162657_g1,c162695_g1,c165956_g1,c169637_g1,c170129_g1,c173844_g1,c174612_g1,c175921_g1,c177576_g1,c179786_g1,c180810_g1,c180810_g2,c180879_g1,c183839_g1,c186793_g2,c187773_g1,c187939_g1,c188034_g1,c188060_g1,c190185_g1,c190584_g1,c190717_g1,c19…	BP	0.01361	0.0179482	110	478	5
GO:0009965	leaf morphogenesis	c198327_g1,c204943_g2,c228671_g1,c229947_g1	BP	0.01409	0.0183518	4	6	5
GO:0019676	ammonia assimilation cycle	c224995_g1,c225965_g1,c250820_g1,c90267_g1	BP	0.01409	0.0183518	4	6	3
GO:0019740	nitrogen utilization	c224995_g1,c225965_g1,c250820_g1,c90267_g1	BP	0.01409	0.0183518	4	6	2
GO:0098771	inorganic ion homeostasis	c130240_g1,c156305_g1,c187199_g1,c203983_g1,c204916_g1,c206693_g1,c213209_g1,c213209_g3,c213633_g1,c224674_g5,c228561_g1,c87475_g1	BP	0.01454	0.018707	12	33	7
GO:0045184	establishment of protein localization	c102060_g1,c109154_g1,c109515_g1,c125359_g1,c132005_g1,c132271_g1,c137010_g1,c144062_g1,c151769_g1,c156305_g1,c157250_g1,c157721_g1,c161062_g1,c161985_g1,c162657_g1,c162695_g1,c165956_g1,c169637_g1,c170129_g1,c173844_g1,c174612_g1,c175921_g1,c180810_g1,c180810_g2,c180879_g1,c183839_g1,c187773_g1,c188034_g1,c188060_g1,c190185_g1,c190584_g1,c194668_g1,c197650_g1,c199584_g1,c201026_g1,c201053_g1,c20…	BP	0.01505	0.0192458	89	379	4
GO:0042727	flavin-containing compound biosynthetic process	c108834_g2,c174467_g1,c186154_g1,c198703_g1,c207742_g1,c228647_g3	BP	0.01515	0.0192569	6	12	6
GO:0006012	galactose metabolic process	c131861_g1,c181035_g1,c196911_g1,c206441_g3,c212088_g1	BP	0.01576	0.0198529	5	9	6
GO:0043174	nucleoside salvage	c162291_g1,c173745_g1,c198119_g3,c208395_g1,c225822_g3	BP	0.01576	0.0198529	5	9	5
GO:0006081	cellular aldehyde metabolic process	c148213_g1,c175926_g1,c190481_g1,c198928_g1,c199794_g1,c200306_g1,c210398_g1,c219304_g2,c223604_g2,c229271_g9,c230576_g2,c267178_g1,c27016_g1,c302597_g1,c302638_g1,c58352_g1	BP	0.01601	0.0199888	16	49	4
GO:0008104	protein localization	c102060_g1,c109154_g1,c109515_g1,c125359_g1,c132005_g1,c132271_g1,c137010_g1,c144062_g1,c151769_g1,c156305_g1,c157250_g1,c157721_g1,c161062_g1,c161985_g1,c162657_g1,c162695_g1,c165956_g1,c169637_g1,c170129_g1,c173844_g1,c174612_g1,c175921_g1,c180810_g1,c180810_g2,c180879_g1,c183839_g1,c187773_g1,c188034_g1,c188060_g1,c190185_g1,c190584_g1,c194668_g1,c197650_g1,c199584_g1,c201026_g1,c201053_g1,c20…	BP	0.01636	0.0203056	90	385	4
GO:0016125	sterol metabolic process	c130751_g1,c179522_g2,c184673_g1,c193591_g2,c204873_g1,c207630_g2,c208315_g1,c215607_g1,c231377_g1,c285478_g1	BP	0.01641	0.0201896	10	26	5
GO:0016126	sterol biosynthetic process	c130751_g1,c179522_g2,c184673_g1,c193591_g2,c204873_g1,c207630_g2,c208315_g1,c215607_g1,c231377_g1,c285478_g1	BP	0.01641	0.0201896	10	26	6
GO:0055076	transition metal ion homeostasis	c187199_g1,c203983_g1,c204916_g1,c206693_g1,c213633_g1,c224674_g5,c228561_g1,c87475_g1	BP	0.01728	0.0210756	8	19	9
GO:0009226	nucleotide-sugar biosynthetic process	c131861_g1,c200690_g1,c205192_g1,c205703_g1,c206434_g1,c207059_g1,c208356_g2,c213620_g1,c213620_g2,c217836_g1,c226435_g2	BP	0.01777	0.0215487	11	30	6
GO:0051234	establishment of localization	c101450_g1,c101862_g1,c102060_g1,c109154_g1,c109515_g1,c109806_g1,c125359_g1,c126127_g1,c132005_g1,c132235_g1,c132271_g1,c137010_g1,c137181_g1,c137210_g1,c144062_g1,c146605_g1,c146942_g1,c151769_g1,c152081_g1,c153217_g1,c15532_g1,c156305_g1,c156442_g1,c157250_g1,c157721_g1,c160544_g1,c161062_g1,c161167_g1,c161985_g1,c162657_g1,c162695_g1,c165956_g1,c167710_g1,c169523_g1,c169637_g1,c169640_g1,c170…	BP	0.0186	0.0224263	276	1308	3
GO:0006810	transport	c101450_g1,c101862_g1,c102060_g1,c109154_g1,c109515_g1,c109806_g1,c125359_g1,c126127_g1,c132005_g1,c132235_g1,c132271_g1,c137010_g1,c137181_g1,c137210_g1,c144062_g1,c146605_g1,c146942_g1,c151769_g1,c152081_g1,c153217_g1,c15532_g1,c156305_g1,c156442_g1,c157250_g1,c157721_g1,c160544_g1,c161062_g1,c161167_g1,c161985_g1,c162657_g1,c162695_g1,c165956_g1,c167710_g1,c169523_g1,c169637_g1,c169640_g1,c170…	BP	0.02007	0.0240612	275	1305	4
GO:0006536	glutamate metabolic process	c197102_g1,c224995_g1,c225965_g1,c228200_g2,c250820_g1,c250931_g1,c90267_g1	BP	0.02039	0.0242383	7	16	7
GO:0035999	tetrahydrofolate interconversion	c144434_g1,c159481_g1,c162045_g1,c162045_g2,c205001_g1,c209171_g1,c211109_g1	BP	0.02039	0.0242383	7	16	5
GO:0051179	localization	c101450_g1,c101862_g1,c102060_g1,c109154_g1,c109515_g1,c109806_g1,c125359_g1,c126127_g1,c132005_g1,c132235_g1,c132271_g1,c137010_g1,c137181_g1,c137210_g1,c144062_g1,c146605_g1,c146942_g1,c151769_g1,c152081_g1,c153217_g1,c15532_g1,c156305_g1,c156442_g1,c157250_g1,c157721_g1,c160544_g1,c161062_g1,c161167_g1,c161985_g1,c162657_g1,c162695_g1,c165956_g1,c167710_g1,c169523_g1,c169637_g1,c169640_g1,c170…	BP	0.0215	0.0253436	277	1317	2
GO:0006166	purine ribonucleoside salvage	c162291_g1,c173745_g1,c208395_g1	BP	0.02356	0.0270908	3	4	6
GO:0006855	drug transmembrane transport	c210373_g1,c225965_g1,c90267_g1	BP	0.02356	0.0270908	3	4	6
GO:0016137	glycoside metabolic process	c175926_g1,c200306_g1,c229271_g9	BP	0.02356	0.0270908	3	4	6
GO:0016138	glycoside biosynthetic process	c175926_g1,c200306_g1,c229271_g9	BP	0.02356	0.0270908	3	4	7
GO:0042752	regulation of circadian rhythm	c218999_g1,c228671_g1,c229947_g1	BP	0.02356	0.0270908	3	4	3
GO:0044209	AMP salvage	c162291_g1,c173745_g1,c208395_g1	BP	0.02356	0.0270908	3	4	7
GO:1901804	beta-glucoside metabolic process	c175926_g1,c200306_g1,c229271_g9	BP	0.02356	0.0270908	3	4	7
GO:1901806	beta-glucoside biosynthetic process	c175926_g1,c200306_g1,c229271_g9	BP	0.02356	0.0270908	3	4	8
GO:0048878	chemical homeostasis	c130240_g1,c153099_g1,c156305_g1,c176963_g1,c187199_g1,c203983_g1,c204916_g1,c206693_g1,c213209_g1,c213209_g3,c213633_g1,c224674_g5,c228561_g1,c229513_g4,c87475_g1	BP	0.02388	0.0268015	15	47	5
GO:0006790	sulfur compound metabolic process	c137532_g1,c137532_g2,c153099_g1,c156181_g1,c172396_g1,c176328_g1,c177014_g1,c178792_g1,c187783_g1,c204438_g1,c204873_g1,c205182_g1,c210325_g1,c210802_g1,c214135_g1,c215607_g1,c222662_g3,c222769_g1,c222769_g2,c224117_g2,c224117_g8,c231108_g4,c232311_g1,c250059_g1,c39751_g2,c90003_g1	BP	0.02556	0.0285352	26	94	4
GO:0006576	cellular biogenic amine metabolic process	c153099_g1,c176474_g1,c182497_g1,c213930_g2,c220427_g2,c224117_g2,c224117_g8,c285144_g1,c43615_g1	BP	0.02661	0.0295511	9	24	6
GO:0008216	spermidine metabolic process	c220427_g2,c224117_g2,c224117_g8,c285144_g1	BP	0.02797	0.0304996	4	7	5
GO:0008295	spermidine biosynthetic process	c220427_g2,c224117_g2,c224117_g8,c285144_g1	BP	0.02797	0.0304996	4	7	6
GO:0015718	monocarboxylic acid transport	c193467_g1,c205077_g1,c210373_g1,c210413_g1	BP	0.02797	0.0304996	4	7	8
GO:0015748	organophosphate ester transport	c187939_g1,c193467_g1,c205077_g1,c210413_g1	BP	0.02797	0.0304996	4	7	6
GO:0033319	UDP-D-xylose metabolic process	c208356_g2,c213620_g1,c213620_g2,c217836_g1	BP	0.02797	0.0304996	4	7	5
GO:0033320	UDP-D-xylose biosynthetic process	c208356_g2,c213620_g1,c213620_g2,c217836_g1	BP	0.02797	0.0304996	4	7	6
GO:0009225	nucleotide-sugar metabolic process	c131861_g1,c200690_g1,c205192_g1,c205703_g1,c206434_g1,c207059_g1,c208356_g2,c213620_g1,c213620_g2,c217836_g1,c226435_g2	BP	0.02911	0.0311787	11	32	5
GO:0006767	water-soluble vitamin metabolic process	c108834_g2,c137472_g1,c156181_g1,c170920_g1,c174467_g1,c205182_g1,c207742_g1,c214371_g7,c217361_g1,c217361_g2,c222662_g3,c228647_g3,c231108_g4,c302597_g1	BP	0.02928	0.0311238	14	44	5
GO:0042364	water-soluble vitamin biosynthetic process	c108834_g2,c137472_g1,c156181_g1,c170920_g1,c174467_g1,c205182_g1,c207742_g1,c214371_g7,c217361_g1,c217361_g2,c222662_g3,c228647_g3,c231108_g4,c302597_g1	BP	0.02928	0.0311238	14	44	6
GO:0042592	homeostatic process	c130240_g1,c153099_g1,c156305_g1,c176963_g1,c187199_g1,c203983_g1,c204916_g1,c206693_g1,c213209_g1,c213209_g3,c213633_g1,c224674_g5,c228561_g1,c229513_g4,c87475_g1	BP	0.03447	0.0363658	15	49	4
GO:0006730	one-carbon metabolic process	c144434_g1,c159481_g1,c162045_g1,c162045_g2,c204415_g1,c205001_g1,c209171_g1,c211109_g1,c225926_g6,c90003_g1	BP	0.03593	0.0377176	10	29	4
GO:0008652	cellular amino acid biosynthetic process	c102055_g1,c137532_g1,c137532_g2,c153259_g1,c158031_g1,c176474_g1,c178792_g1,c182497_g1,c198415_g1,c201346_g1,c204438_g1,c209049_g1,c209518_g2,c210032_g1,c210802_g1,c211330_g2,c213930_g2,c214135_g1,c215659_g1,c216074_g3,c216473_g2,c217180_g1,c217912_g1,c221591_g5,c224199_g3,c224995_g1,c225949_g1,c228200_g2,c232271_g1,c232311_g1,c232320_g1,c249904_g1,c39751_g2,c43615_g1	BP	0.03702	0.0386694	34	133	5
GO:0008272	sulfate transport	c205481_g1,c208780_g1,c209120_g1,c215883_g1,c229969_g1	BP	0.04137	0.0428947	5	11	6
GO:0015893	drug transport	c187939_g1,c210373_g1,c225965_g1,c66177_g1,c90267_g1	BP	0.04137	0.0428947	5	11	5
GO:0030258	lipid modification	c187939_g1,c188049_g1,c209581_g1,c213849_g1,c220072_g3,c221650_g3,c221650_g4,c230856_g4	BP	0.04296	0.0442174	8	22	5
GO:0044106	cellular amine metabolic process	c153099_g1,c176474_g1,c182497_g1,c213930_g2,c220427_g2,c224117_g2,c224117_g8,c285144_g1,c43615_g1	BP	0.04448	0.0455596	9	26	5
GO:0046184	aldehyde biosynthetic process	c175926_g1,c200306_g1,c229271_g9,c302597_g1	BP	0.04764	0.0483271	4	8	5
GO:1901661	quinone metabolic process	c213917_g5,c218761_g1,c226776_g2,c28036_g1	BP	0.04764	0.0483271	4	8	5
GO:1901663	quinone biosynthetic process	c213917_g5,c218761_g1,c226776_g2,c28036_g1	BP	0.04764	0.0483271	4	8	6
GO:0055072	iron ion homeostasis	c204916_g1,c206693_g1,c213633_g1,c224674_g5,c228561_g1,c87475_g1	BP	0.04907	0.0491866	6	15	10
GO:0072329	monocarboxylic acid catabolic process	c187939_g1,c209581_g1,c213849_g1,c221650_g3,c221650_g4,c230856_g4	BP	0.04907	0.0491866	6	15	7
GO:0004298	threonine-type endopeptidase activity	c144266_g1,c177087_g1,c186467_g1,c187091_g1,c195598_g1,c203335_g1,c210127_g1,c213487_g1,c214254_g1,c218693_g1,c225806_g2,c229565_g1,c267122_g1,c267394_g1,c320579_g1,c84163_g1,c84163_g2,c87543_g1	MF	1e-11	7.86667e-10	18	20	7
GO:0070003	threonine-type peptidase activity	c144266_g1,c177087_g1,c186467_g1,c187091_g1,c195598_g1,c203335_g1,c210127_g1,c213487_g1,c214254_g1,c218693_g1,c225806_g2,c229565_g1,c267122_g1,c267394_g1,c320579_g1,c84163_g1,c84163_g2,c87543_g1	MF	1e-11	7.86667e-10	18	20	6
GO:0008238	exopeptidase activity	c108871_g1,c176172_g2,c184669_g1,c187783_g1,c194503_g1,c199799_g1,c206019_g1,c209590_g1,c213131_g1,c213158_g6,c213244_g1,c217066_g4,c219673_g6,c221498_g1,c222769_g1,c222769_g2,c223423_g1,c224794_g4,c227814_g3,c230469_g3,c231543_g1,c231543_g2,c231701_g1,c231701_g2,c87490_g1,c90029_g1,c90029_g2	MF	3.2e-07	1.25867e-05	27	55	6
GO:0070011	peptidase activity, acting on L-amino acid peptides	c108871_g1,c144266_g1,c149557_g1,c156247_g1,c169578_g1,c169674_g1,c176154_g3,c176172_g2,c177087_g1,c184669_g1,c184727_g1,c186467_g1,c187091_g1,c187783_g1,c190578_g1,c190594_g1,c190607_g1,c192811_g1,c194503_g1,c195598_g1,c195685_g1,c199102_g1,c199404_g1,c199799_g1,c199822_g1,c199822_g2,c200094_g1,c203335_g1,c204933_g1,c205298_g1,c205586_g1,c205616_g1,c206019_g1,c206475_g1,c208872_g2,c209104_g1,c20…	MF	1.1e-06	3.245e-05	98	334	5
GO:0008233	peptidase activity	c108871_g1,c144266_g1,c149557_g1,c154790_g1,c156247_g1,c169578_g1,c169674_g1,c176154_g3,c176172_g2,c177087_g1,c184669_g1,c184727_g1,c186467_g1,c187091_g1,c187783_g1,c190578_g1,c190594_g1,c190607_g1,c192811_g1,c194503_g1,c195598_g1,c195685_g1,c199102_g1,c199404_g1,c199799_g1,c199822_g1,c199822_g2,c200094_g1,c203335_g1,c204933_g1,c205298_g1,c205586_g1,c205616_g1,c206019_g1,c206475_g1,c206497_g2,c20…	MF	2.4e-05	0.0005664	101	370	4
GO:0004739	pyruvate dehydrogenase (acetyl-transferring) activity	c139238_g1,c199516_g1,c204369_g2,c221451_g4,c226869_g1,c320611_g1	MF	4.4e-05	0.000865333	6	6	6
GO:0008483	transaminase activity	c150469_g1,c153099_g1,c158031_g1,c190236_g1,c197102_g1,c198178_g1,c201346_g1,c203633_g1,c214371_g7,c215659_g1,c222367_g7,c231108_g4,c232271_g1,c232320_g1,c250931_g1,c267302_g1	MF	0.0001	0.00157333	16	33	5
GO:0016769	transferase activity, transferring nitrogenous groups	c150469_g1,c153099_g1,c158031_g1,c190236_g1,c197102_g1,c198178_g1,c201346_g1,c203633_g1,c214371_g7,c215659_g1,c222367_g7,c231108_g4,c232271_g1,c232320_g1,c250931_g1,c267302_g1	MF	0.0001	0.00157333	16	33	4
GO:0016614	oxidoreductase activity, acting on CH-OH group of donors	c126221_g1,c130963_g1,c149524_g1,c183933_g1,c185968_g1,c190716_g1,c196432_g1,c204099_g1,c204100_g1,c205192_g1,c205703_g1,c208315_g1,c208535_g1,c208697_g1,c209049_g1,c213599_g2,c214176_g1,c214176_g3,c214554_g2,c214862_g1,c215042_g1,c216392_g2,c218709_g1,c219304_g2,c221650_g3,c221650_g4,c223039_g1,c225288_g1,c225949_g1,c226028_g1,c226961_g4,c230576_g2,c231820_g3,c267178_g1,c27016_g1,c320885_g1,c398…	MF	0.00011	0.00144222	39	117	4
GO:0019843	rRNA binding	c111203_g1,c137688_g1,c138483_g1,c148169_g1,c154384_g1,c173689_g1,c201951_g1,c202447_g1,c21368_g1,c218301_g5,c222989_g12,c227172_g4,c232888_g1,c2757_g1,c320499_g1,c325007_g1,c43546_g1,c72337_g1,c73164_g1,c76792_g1,c88305_g1	MF	0.00012	0.001416	21	50	6
GO:0016616	oxidoreductase activity, acting on the CH-OH group of donors, NAD or NADP as acceptor	c126221_g1,c149524_g1,c183933_g1,c185968_g1,c190716_g1,c196432_g1,c204099_g1,c204100_g1,c205192_g1,c205703_g1,c208315_g1,c208535_g1,c208697_g1,c209049_g1,c213599_g2,c214176_g1,c214176_g3,c214554_g2,c214862_g1,c215042_g1,c216392_g2,c218709_g1,c221650_g3,c221650_g4,c223039_g1,c225288_g1,c225949_g1,c226961_g4,c230576_g2,c231820_g3,c267178_g1,c27016_g1,c320885_g1,c39850_g1,c58352_g1	MF	0.00025	0.00268182	35	105	5
GO:0004738	pyruvate dehydrogenase activity	c139238_g1,c199516_g1,c204369_g2,c221451_g4,c226869_g1,c320611_g1	MF	0.00026	0.00255667	6	7	5
GO:0019201	nucleotide kinase activity	c148454_g1,c176951_g1,c196904_g1,c199838_g2,c214501_g6,c216907_g4,c232269_g1,c303895_g1	MF	0.00037	0.00335846	8	12	7
GO:0016830	carbon-carbon lyase activity	c139430_g1,c161048_g1,c169474_g1,c176474_g1,c180616_g1,c180616_g2,c184713_g1,c197145_g1,c203633_g1,c204873_g1,c206088_g1,c208356_g2,c209518_g2,c212216_g1,c212216_g2,c213620_g1,c213620_g2,c217836_g1,c218761_g1,c220427_g2,c223768_g3,c224117_g2,c224117_g8,c226414_g1,c285112_g1,c43615_g1	MF	0.00049	0.00413	26	73	4
GO:0019205	nucleobase-containing compound kinase activity	c148454_g1,c176951_g1,c190282_g2,c196904_g1,c197267_g1,c198119_g3,c199838_g2,c208395_g1,c214501_g6,c216907_g4,c225822_g3,c232269_g1,c303895_g1	MF	0.0005	0.00393333	13	27	6
GO:0004743	pyruvate kinase activity	c151047_g1,c151047_g2,c151047_g4,c161865_g1,c181634_g1,c201148_g1,c220308_g1	MF	0.00057	0.00420375	7	10	#N/A
GO:0001882	nucleoside binding	c109154_g1,c109515_g1,c132005_g1,c132271_g1,c137270_g1,c143883_g1,c153663_g1,c157721_g1,c161062_g1,c161176_g1,c162657_g1,c165956_g1,c171330_g2,c171330_g3,c174423_g1,c176470_g3,c185996_g1,c189463_g1,c190147_g1,c190619_g1,c194506_g1,c197217_g1,c197595_g1,c197650_g1,c198069_g1,c198119_g3,c200690_g1,c200758_g1,c203172_g1,c203916_g1,c209179_g1,c209837_g1,c209837_g2,c213466_g4,c214156_g1,c217325_g1,c21…	MF	0.0006	0.00372632	54	189	4
GO:0001883	purine nucleoside binding	c109154_g1,c109515_g1,c132005_g1,c132271_g1,c137270_g1,c143883_g1,c153663_g1,c157721_g1,c161062_g1,c161176_g1,c162657_g1,c165956_g1,c171330_g2,c171330_g3,c174423_g1,c176470_g3,c185996_g1,c189463_g1,c190147_g1,c190619_g1,c194506_g1,c197217_g1,c197595_g1,c197650_g1,c198069_g1,c198119_g3,c200690_g1,c200758_g1,c203172_g1,c203916_g1,c209179_g1,c209837_g1,c209837_g2,c213466_g4,c214156_g1,c217325_g1,c21…	MF	0.0006	0.00372632	54	189	5
GO:0005525	GTP binding	c109154_g1,c109515_g1,c132005_g1,c132271_g1,c137270_g1,c143883_g1,c153663_g1,c157721_g1,c161062_g1,c161176_g1,c162657_g1,c165956_g1,c171330_g2,c171330_g3,c174423_g1,c176470_g3,c185996_g1,c189463_g1,c190147_g1,c190619_g1,c194506_g1,c197217_g1,c197595_g1,c197650_g1,c198069_g1,c198119_g3,c200690_g1,c200758_g1,c203172_g1,c203916_g1,c209179_g1,c209837_g1,c209837_g2,c213466_g4,c214156_g1,c217325_g1,c21…	MF	0.0006	0.00372632	54	189	6
GO:0032549	ribonucleoside binding	c109154_g1,c109515_g1,c132005_g1,c132271_g1,c137270_g1,c143883_g1,c153663_g1,c157721_g1,c161062_g1,c161176_g1,c162657_g1,c165956_g1,c171330_g2,c171330_g3,c174423_g1,c176470_g3,c185996_g1,c189463_g1,c190147_g1,c190619_g1,c194506_g1,c197217_g1,c197595_g1,c197650_g1,c198069_g1,c198119_g3,c200690_g1,c200758_g1,c203172_g1,c203916_g1,c209179_g1,c209837_g1,c209837_g2,c213466_g4,c214156_g1,c217325_g1,c21…	MF	0.0006	0.00372632	54	189	5
GO:0032550	purine ribonucleoside binding	c109154_g1,c109515_g1,c132005_g1,c132271_g1,c137270_g1,c143883_g1,c153663_g1,c157721_g1,c161062_g1,c161176_g1,c162657_g1,c165956_g1,c171330_g2,c171330_g3,c174423_g1,c176470_g3,c185996_g1,c189463_g1,c190147_g1,c190619_g1,c194506_g1,c197217_g1,c197595_g1,c197650_g1,c198069_g1,c198119_g3,c200690_g1,c200758_g1,c203172_g1,c203916_g1,c209179_g1,c209837_g1,c209837_g2,c213466_g4,c214156_g1,c217325_g1,c21…	MF	0.0006	0.00372632	54	189	6
GO:0016831	carboxy-lyase activity	c139430_g1,c161048_g1,c169474_g1,c180616_g1,c180616_g2,c184713_g1,c197145_g1,c204873_g1,c208356_g2,c209518_g2,c213620_g1,c213620_g2,c217836_g1,c220427_g2,c223768_g3,c224117_g2,c224117_g8,c226414_g1,c285112_g1	MF	0.00062	0.00332545	19	48	5
GO:0016624	oxidoreductase activity, acting on the aldehyde or oxo group of donors, disulfide as acceptor	c139238_g1,c199516_g1,c204369_g2,c221451_g4,c226869_g1,c320611_g1	MF	0.00086	0.00441217	6	8	5
GO:0033841	6G-fructosyltransferase activity	c205910_g1,c209237_g1,c217491_g1,c229949_g1,c42423_g1	MF	0.00118	0.00568327	5	6	7
GO:0050738	fructosyltransferase activity	c205910_g1,c209237_g1,c217491_g1,c229949_g1,c42423_g1	MF	0.00118	0.00568327	5	6	6
GO:0016491	oxidoreductase activity	c102274_g1,c108880_g1,c126221_g1,c130388_g1,c130963_g1,c131317_g1,c131842_g1,c136974_g1,c137211_g1,c138498_g1,c139238_g1,c139430_g1,c144434_g1,c144571_g1,c146118_g2,c148313_g1,c148995_g2,c149524_g1,c153995_g1,c160340_g1,c161071_g1,c162455_g1,c162704_g1,c162781_g1,c169632_g1,c170920_g1,c171525_g1,c174815_g1,c178604_g1,c180600_g1,c181035_g1,c181320_g1,c183933_g1,c184673_g1,c185968_g1,c187337_g1,c19…	MF	0.0012	0.00544615	177	771	3
GO:0004742	dihydrolipoyllysine-residue acetyltransferase activity	c140023_g1,c199759_g1,c228355_g2,c230462_g1	MF	0.00124	0.00522571	4	4	4
GO:0016418	S-acetyltransferase activity	c140023_g1,c199759_g1,c228355_g2,c230462_g1	MF	0.00124	0.00522571	4	4	7
GO:0030523	dihydrolipoamide S-acyltransferase activity	c140023_g1,c199759_g1,c228355_g2,c230462_g1	MF	0.00124	0.00522571	4	4	7
GO:0015288	porin activity	c161167_g1,c175946_g1,c190460_g1,c213433_g2,c267131_g1,c39821_g1,c73170_g1	MF	0.00132	0.00494476	7	11	7
GO:0016837	carbon-oxygen lyase activity, acting on polysaccharides	c193411_g2,c205205_g1,c207990_g1,c207990_g2,c211032_g1,c215382_g1,c215382_g2	MF	0.00132	0.00494476	7	11	5
GO:0022829	wide pore channel activity	c161167_g1,c175946_g1,c190460_g1,c213433_g2,c267131_g1,c39821_g1,c73170_g1	MF	0.00132	0.00494476	7	11	6
GO:0030570	pectate lyase activity	c193411_g2,c205205_g1,c207990_g1,c207990_g2,c211032_g1,c215382_g1,c215382_g2	MF	0.00132	0.00494476	7	11	6
GO:0004177	aminopeptidase activity	c108871_g1,c176172_g2,c199799_g1,c209590_g1,c213244_g1,c231701_g1,c231701_g2,c87490_g1,c90029_g1,c90029_g2	MF	0.00156	0.00541412	10	20	7
GO:0004180	carboxypeptidase activity	c184669_g1,c206019_g1,c213131_g1,c213158_g6,c217066_g4,c219673_g6,c221498_g1,c224794_g4,c227814_g3,c230469_g3,c231543_g1,c231543_g2	MF	0.00195	0.00657429	12	27	7
GO:0016667	oxidoreductase activity, acting on a sulfur group of donors	c160340_g1,c187337_g1,c190156_g1,c195204_g1,c196881_g1,c203338_g1,c204308_g1,c205332_g1,c207677_g1,c223494_g1,c43359_g1	MF	0.00222	0.00727667	11	24	4
GO:0019001	guanyl nucleotide binding	c109154_g1,c109515_g1,c132005_g1,c132271_g1,c137270_g1,c143883_g1,c153663_g1,c157721_g1,c161062_g1,c161176_g1,c162657_g1,c165956_g1,c171330_g2,c171330_g3,c174423_g1,c176470_g3,c185996_g1,c189463_g1,c190147_g1,c190619_g1,c194506_g1,c197217_g1,c197595_g1,c197650_g1,c198069_g1,c198119_g3,c200690_g1,c200758_g1,c203172_g1,c203916_g1,c209179_g1,c209837_g1,c209837_g2,c213466_g4,c214156_g1,c217325_g1,c21…	MF	0.00276	0.0086848	54	201	6
GO:0032561	guanyl ribonucleotide binding	c109154_g1,c109515_g1,c132005_g1,c132271_g1,c137270_g1,c143883_g1,c153663_g1,c157721_g1,c161062_g1,c161176_g1,c162657_g1,c165956_g1,c171330_g2,c171330_g3,c174423_g1,c176470_g3,c185996_g1,c189463_g1,c190147_g1,c190619_g1,c194506_g1,c197217_g1,c197595_g1,c197650_g1,c198069_g1,c198119_g3,c200690_g1,c200758_g1,c203172_g1,c203916_g1,c209179_g1,c209837_g1,c209837_g2,c213466_g4,c214156_g1,c217325_g1,c21…	MF	0.00276	0.0086848	54	201	6
GO:0016209	antioxidant activity	c131842_g1,c146118_g2,c148995_g2,c171525_g1,c187337_g1,c190511_g1,c197282_g1,c197593_g2,c199036_g1,c203338_g1,c205332_g1,c206576_g1,c207677_g1,c208222_g2,c218993_g2,c222871_g8,c226142_g2,c249943_g1,c249955_g1,c267132_g1,c43348_g1,c57316_g1	MF	0.00339	0.0102569	22	66	2
GO:0004017	adenylate kinase activity	c148454_g1,c196904_g1,c199838_g2,c232269_g1,c303895_g1	MF	0.00348	0.00989494	5	7	6
GO:0008793	aromatic-amino-acid:2-oxoglutarate aminotransferase activity	c153099_g1,c158031_g1,c197102_g1,c215659_g1,c250931_g1	MF	0.00348	0.00989494	5	7	6
GO:0070546	L-phenylalanine aminotransferase activity	c153099_g1,c158031_g1,c197102_g1,c215659_g1,c250931_g1	MF	0.00348	0.00989494	5	7	6
GO:0080130	L-phenylalanine:2-oxoglutarate aminotransferase activity	c153099_g1,c158031_g1,c197102_g1,c215659_g1,c250931_g1	MF	0.00348	0.00989494	5	7	7
GO:0016651	oxidoreductase activity, acting on NAD(P)H	c136974_g1,c138498_g1,c153995_g1,c161071_g1,c180600_g1,c187337_g1,c203338_g1,c205332_g1,c206647_g1,c207677_g1,c219812_g1,c222162_g2,c223494_g1,c229854_g2,c270998_g1,c285121_g1	MF	0.00453	0.0121486	16	44	4
GO:0016860	intramolecular oxidoreductase activity	c110032_g1,c110032_g2,c148213_g1,c190722_g1,c193591_g2,c199794_g1,c200125_g1,c210398_g1,c213930_g2,c221650_g3,c221650_g4,c225626_g1,c73497_g1	MF	0.00464	0.0121671	13	33	4
GO:0016157	sucrose synthase activity	c196400_g1,c196400_g3,c206084_g1,c210438_g1	MF	0.00528	0.0135443	4	5	7
GO:0016776	phosphotransferase activity, phosphate group as acceptor	c148454_g1,c176951_g1,c190282_g2,c196904_g1,c197267_g1,c199838_g2,c216907_g4,c232269_g1,c303895_g1	MF	0.00648	0.0162689	9	20	5
GO:0015131	oxaloacetate transmembrane transporter activity	c225965_g1,c250820_g1,c90267_g1	MF	0.00662	0.0156232	3	3	8
GO:0015140	malate transmembrane transporter activity	c225965_g1,c250820_g1,c90267_g1	MF	0.00662	0.0156232	3	3	8
GO:0015179	L-amino acid transmembrane transporter activity	c153217_g1,c225965_g1,c90267_g1	MF	0.00662	0.0156232	3	3	7
GO:0015556	C4-dicarboxylate transmembrane transporter activity	c225965_g1,c250820_g1,c90267_g1	MF	0.00662	0.0156232	3	3	7
GO:0102970	7-deoxyloganetic acid glucosyltransferase activity	c175926_g1,c200306_g1,c229271_g9	MF	0.00662	0.0156232	3	3	6
GO:0016861	intramolecular oxidoreductase activity, interconverting aldoses and ketoses	c110032_g1,c110032_g2,c148213_g1,c199794_g1,c200125_g1,c210398_g1,c213930_g2,c73497_g1	MF	0.00736	0.0163864	8	17	5
GO:0008242	omega peptidase activity	c187783_g1,c194503_g1,c222769_g1,c222769_g2,c223423_g1	MF	0.00786	0.0171756	5	8	7
GO:0051537	2 iron, 2 sulfur cluster binding	c145785_g1,c180600_g1,c187857_g1,c197911_g1,c204191_g1,c211423_g1,c25404_g1,c320440_g1,c320566_g1,c72996_g1	MF	0.008	0.0171636	10	24	5
GO:0016829	lyase activity	c116947_g1,c139430_g1,c154738_g1,c158643_g1,c161048_g1,c169474_g1,c169694_g1,c171322_g1,c176474_g1,c176856_g1,c180616_g1,c180616_g2,c184713_g1,c191448_g1,c193411_g2,c197145_g1,c197168_g1,c198415_g1,c203633_g1,c204873_g1,c205182_g1,c205205_g1,c206088_g1,c207990_g1,c207990_g2,c208356_g2,c209518_g2,c210802_g1,c211032_g1,c212216_g1,c212216_g2,c213620_g1,c213620_g2,c215382_g1,c215382_g2,c217836_g1,c21…	MF	0.00949	0.0199968	53	208	3
GO:0015925	galactosidase activity	c1728_g1,c198912_g1,c210794_g7,c215302_g2,c217123_g2,c221627_g1,c228135_g1,c228135_g2,c228135_g3	MF	0.01341	0.0277611	9	22	6
GO:0004448	isocitrate dehydrogenase activity	c149524_g1,c208697_g1,c213599_g2,c39850_g1	MF	0.01348	0.0271904	4	6	6
GO:0016635	oxidoreductase activity, acting on the CH-CH group of donors, quinone or related compound as acceptor	c148313_g1,c174815_g1,c211423_g1,c217065_g1	MF	0.01348	0.0271904	4	6	5
GO:0016879	ligase activity, forming carbon-nitrogen bonds	c149226_g1,c153259_g1,c176328_g1,c198069_g1,c210130_g2,c211109_g1,c216074_g3,c223124_g1,c224199_g3,c224217_g1,c229790_g3,c231108_g4,c250059_g1	MF	0.01381	0.0271597	13	37	4
GO:0016742	hydroxymethyl-, formyl- and related transferase activity	c137472_g1,c159481_g1,c162045_g1,c162045_g2,c205001_g1,c209171_g1	MF	0.01427	0.0276043	6	12	5
GO:0008514	organic anion transmembrane transporter activity	c153217_g1,c187939_g1,c193467_g1,c205077_g1,c210373_g1,c210413_g1,c223232_g1,c225965_g1,c250820_g1,c90267_g1	MF	0.0151	0.0287387	10	26	6
GO:0005342	organic acid transmembrane transporter activity	c153217_g1,c193467_g1,c205077_g1,c210373_g1,c210413_g1,c225965_g1,c250820_g1,c90267_g1	MF	0.01608	0.0296475	8	19	4
GO:0015144	carbohydrate transmembrane transporter activity	c146605_g1,c190442_g1,c190498_g1,c193467_g1,c204352_g2,c210373_g1,c214036_g2,c224817_g3	MF	0.01608	0.0296475	8	19	4
GO:0046943	carboxylic acid transmembrane transporter activity	c153217_g1,c193467_g1,c205077_g1,c210373_g1,c210413_g1,c225965_g1,c250820_g1,c90267_g1	MF	0.01608	0.0296475	8	19	5
GO:0003993	acid phosphatase activity	c139429_g1,c197593_g2,c213753_g1,c213753_g2,c224724_g3,c57316_g1,c6200_g1	MF	0.01912	0.0341842	7	16	7
GO:0016684	oxidoreductase activity, acting on peroxide as acceptor	c131842_g1,c146118_g2,c148995_g2,c171525_g1,c190511_g1,c197282_g1,c197593_g2,c206576_g1,c208222_g2,c217559_g1,c218993_g2,c222871_g8,c249943_g1,c249955_g1,c267132_g1,c43348_g1,c57316_g1	MF	0.02066	0.0363863	17	55	4
GO:0000104	succinate dehydrogenase activity	c148313_g1,c174815_g1,c211423_g1	MF	0.02276	0.0358091	3	4	5
GO:0003997	acyl-CoA oxidase activity	c197329_g1,c213849_g1,c214192_g1	MF	0.02276	0.0358091	3	4	6
GO:0004618	phosphoglycerate kinase activity	c146940_g1,c186381_g1,c211285_g1	MF	0.02276	0.0358091	3	4	6
GO:0004774	succinate-CoA ligase activity	c179932_g1,c186306_g3,c232236_g3	MF	0.02276	0.0358091	3	4	6
GO:0004775	succinate-CoA ligase (ADP-forming) activity	c179932_g1,c186306_g3,c232236_g3	MF	0.02276	0.0358091	3	4	7
GO:0008113	peptide-methionine (S)-S-oxide reductase activity	c160340_g1,c190156_g1,c43359_g1	MF	0.02276	0.0358091	3	4	6
GO:0008121	ubiquinol-cytochrome-c reductase activity	c204191_g1,c232288_g1,c320566_g1	MF	0.02276	0.0358091	3	4	5
GO:0008177	succinate dehydrogenase (ubiquinone) activity	c148313_g1,c174815_g1,c211423_g1	MF	0.02276	0.0358091	3	4	6
GO:0015301	anion:anion antiporter activity	c205077_g1,c210413_g1,c221253_g2	MF	0.02276	0.0358091	3	4	6
GO:0016681	oxidoreductase activity, acting on diphenols and related substances as donors, cytochrome as acceptor	c204191_g1,c232288_g1,c320566_g1	MF	0.02276	0.0358091	3	4	5
GO:0016688	L-ascorbate peroxidase activity	c148995_g2,c222871_g8,c249955_g1	MF	0.02276	0.0358091	3	4	4
GO:0036374	glutathione hydrolase activity	c187783_g1,c222769_g1,c222769_g2	MF	0.02276	0.0358091	3	4	8
GO:0047631	ADP-ribose diphosphatase activity	c102353_g1,c208393_g1,c231522_g3	MF	0.02276	0.0358091	3	4	7
GO:0051920	peroxiredoxin activity	c208222_g2,c218993_g2,c267132_g1	MF	0.02276	0.0358091	3	4	3
GO:0099516	ion antiporter activity	c205077_g1,c210413_g1,c221253_g2	MF	0.02276	0.0358091	3	4	5
GO:0016835	carbon-oxygen lyase activity	c154738_g1,c158643_g1,c171322_g1,c176856_g1,c193411_g2,c197168_g1,c198415_g1,c205205_g1,c207990_g1,c207990_g2,c211032_g1,c215382_g1,c215382_g2,c217912_g1,c221650_g3,c221650_g4,c223604_g2,c43615_g1	MF	0.02381	0.0338504	18	60	4
GO:0019200	carbohydrate kinase activity	c10609_g1,c154301_g2,c176736_g1,c196911_g1,c207335_g1,c210609_g1,c227698_g1,c231134_g6,c35949_g1	MF	0.02471	0.0347117	9	24	6
GO:0004372	glycine hydroxymethyltransferase activity	c159481_g1,c162045_g1,c162045_g2,c205001_g1,c209171_g1	MF	0.02536	0.0347963	5	10	6
GO:0016668	oxidoreductase activity, acting on a sulfur group of donors, NAD(P) as acceptor	c187337_g1,c203338_g1,c205332_g1,c207677_g1,c223494_g1	MF	0.02536	0.0347963	5	10	5
GO:0046912	transferase activity, transferring acyl groups, acyl groups converted into alkyl on transfer	c130751_g1,c179522_g2,c226043_g4,c227464_g9,c232263_g1	MF	0.02536	0.0347963	5	10	5
GO:0004601	peroxidase activity	c131842_g1,c146118_g2,c148995_g2,c171525_g1,c190511_g1,c197282_g1,c197593_g2,c206576_g1,c208222_g2,c218993_g2,c222871_g8,c249943_g1,c249955_g1,c267132_g1,c43348_g1,c57316_g1	MF	0.02538	0.0340323	16	52	3
GO:0016854	racemase and epimerase activity	c131861_g1,c144626_g1,c198928_g1,c205992_g2,c206441_g3,c217361_g1,c217361_g2,c221650_g3,c221650_g4,c303786_g1	MF	0.02607	0.0345647	10	28	4
GO:0008028	monocarboxylic acid transmembrane transporter activity	c193467_g1,c205077_g1,c210373_g1,c210413_g1	MF	0.0268	0.0345617	4	7	6
GO:0015605	organophosphate ester transmembrane transporter activity	c187939_g1,c193467_g1,c205077_g1,c210413_g1	MF	0.0268	0.0345617	4	7	4
GO:0046556	alpha-L-arabinofuranosidase activity	c160967_g1,c197125_g2,c221330_g1,c229757_g1	MF	0.0268	0.0345617	4	7	6
GO:0048040	UDP-glucuronate decarboxylase activity	c208356_g2,c213620_g1,c213620_g2,c217836_g1	MF	0.0268	0.0345617	4	7	6
GO:0004364	glutathione transferase activity	c155373_g1,c171525_g1,c185988_g1,c205125_g1,c206576_g1,c223742_g8,c249891_g1,c249943_g1	MF	0.0305	0.0382872	8	21	5
GO:0004175	endopeptidase activity	c144266_g1,c177087_g1,c186467_g1,c187091_g1,c190594_g1,c190607_g1,c192811_g1,c195598_g1,c199822_g1,c199822_g2,c200094_g1,c203335_g1,c204933_g1,c209995_g1,c210127_g1,c213487_g1,c214254_g1,c218693_g1,c221577_g1,c225806_g2,c227315_g3,c229565_g1,c232240_g3,c232328_g1,c267122_g1,c267394_g1,c320579_g1,c58851_g1,c84163_g1,c84163_g2,c87543_g1	MF	0.03052	0.0379091	31	119	6
GO:0016853	isomerase activity	c110032_g1,c110032_g2,c131861_g1,c144626_g1,c148213_g1,c182596_g1,c190722_g1,c190770_g1,c193591_g2,c197220_g1,c198928_g1,c199229_g1,c199794_g1,c200099_g1,c200125_g1,c2005_g1,c203285_g1,c205192_g1,c205992_g2,c206434_g1,c206441_g3,c206572_g1,c209581_g1,c210398_g1,c212603_g1,c213930_g2,c21544_g1,c217361_g1,c217361_g2,c218761_g1,c218833_g1,c221650_g3,c221650_g4,c225626_g1,c226435_g2,c227066_g1,c26727…	MF	0.03153	0.0387556	39	156	3
GO:0019213	deacetylase activity	c137449_g2,c162503_g1,c229513_g5,c249904_g1,c26004_g1	MF	0.03943	0.0479664	5	11	4
GO:0016417	S-acyltransferase activity	c140023_g1,c177014_g1,c199759_g1,c208944_g1,c215590_g1,c228355_g2,c230462_g1,c231090_g7	MF	0.04026	0.0482303	8	22	6
GO:0016857	racemase and epimerase activity, acting on carbohydrates and derivatives	c131861_g1,c144626_g1,c198928_g1,c205992_g2,c206441_g3,c217361_g1,c217361_g2,c303786_g1	MF	0.04026	0.0482303	8	22	5
GO:0003727	single-stranded RNA binding	c148596_g1,c180474_g1,c180474_g2,c219911_g2	MF	0.04575	0.0537164	4	8	6
GO:0015036	disulfide oxidoreductase activity	c187337_g1,c203338_g1,c205332_g1,c207677_g1	MF	0.04575	0.0537164	4	8	5
GO:0016765	transferase activity, transferring alkyl or aryl (other than methyl) groups	c102055_g1,c155373_g1,c171525_g1,c178792_g1,c179843_g1,c185988_g1,c204438_g1,c205125_g1,c206576_g1,c214358_g1,c221717_g2,c223742_g8,c226776_g2,c232311_g1,c249891_g1,c249943_g1,c285144_g1,c71295_g1,c90003_g1	MF	0.04793	0.0554484	19	69	4
GO:0003878	ATP citrate synthase activity	c226043_g4,c227464_g9,c232263_g1	MF	0.04899	0.0525529	3	5	6
GO:0003955	NAD(P)H dehydrogenase (quinone) activity	c153995_g1,c229854_g2,c270998_g1	MF	0.04899	0.0525529	3	5	6
GO:0004069	L-aspartate:2-oxoglutarate aminotransferase activity	c197102_g1,c215659_g1,c250931_g1	MF	0.04899	0.0525529	3	5	6
GO:0004332	fructose-bisphosphate aldolase activity	c206088_g1,c212216_g1,c212216_g2	MF	0.04899	0.0525529	3	5	6
GO:0004462	lactoylglutathione lyase activity	c267412_g1,c302638_g1,c64302_g1	MF	0.04899	0.0525529	3	5	5
GO:0004611	phosphoenolpyruvate carboxykinase activity	c180616_g1,c180616_g2,c184713_g1	MF	0.04899	0.0525529	3	5	6
GO:0004617	phosphoglycerate dehydrogenase activity	c126221_g1,c214176_g1,c214176_g3	MF	0.04899	0.0525529	3	5	6
GO:0004791	thioredoxin-disulfide reductase activity	c203338_g1,c205332_g1,c207677_g1	MF	0.04899	0.0525529	3	5	3
GO:0004802	transketolase activity	c208396_g1,c208396_g2,c249877_g1	MF	0.04899	0.0525529	3	5	5
GO:0005310	dicarboxylic acid transmembrane transporter activity	c225965_g1,c250820_g1,c90267_g1	MF	0.04899	0.0525529	3	5	6
GO:0015171	amino acid transmembrane transporter activity	c153217_g1,c225965_g1,c90267_g1	MF	0.04899	0.0525529	3	5	6
GO:0030060	L-malate dehydrogenase activity	c183933_g1,c190716_g1,c226961_g4	MF	0.04899	0.0525529	3	5	6
GO:0045735	nutrient reservoir activity	c130240_g1,c187199_g1,c188049_g1	MF	0.04899	0.0525529	3	5	2
GO:0070568	guanylyltransferase activity	c200690_g1,c215683_g1,c90575_g1	MF	0.04899	0.0525529	3	5	6
GO:0071917	triose-phosphate transmembrane transporter activity	c193467_g1,c205077_g1,c210413_g1	MF	0.04899	0.0525529	3	5	4
GO:0016741	transferase activity, transferring one-carbon groups	c132166_g1,c137472_g1,c137532_g1,c137532_g2,c14434_g1,c159481_g1,c162045_g1,c162045_g2,c162571_g1,c169269_g2,c170483_g1,c184478_g1,c190522_g1,c190522_g2,c190522_g3,c190684_g1,c193480_g1,c194336_g1,c195586_g1,c198178_g1,c199812_g1,c203795_g1,c204415_g1,c205001_g1,c207630_g2,c207896_g1,c207896_g2,c208266_g1,c209171_g1,c209222_g1,c213807_g1,c213917_g5,c214135_g1,c217155_g2,c218869_g2,c220440_g2,c221…	MF	0.04968	0.04968	43	180	4
GO:0005737	cytoplasm	c101263_g1,c101316_g1,c101482_g2,c101517_g1,c101655_g1,c101862_g1,c102055_g1,c102060_g1,c102274_g1,c103118_g1,c108772_g1,c108834_g2,c108853_g1,c108871_g1,c108880_g1,c109154_g1,c109806_g1,c110032_g1,c110032_g2,c111203_g1,c125359_g1,c126221_g1,c126236_g1,c128775_g1,c130202_g1,c130240_g1,c130388_g1,c130963_g1,c130965_g1,c13108_g1,c131273_g1,c131667_g1,c131732_g1,c131737_g1,c131842_g1,c131861_g1,c132…	CC	1.2e-15	6.36e-14	880	3980	4
GO:0005839	proteasome core complex	c144266_g1,c177087_g1,c186467_g1,c187091_g1,c195598_g1,c203335_g1,c213487_g1,c214254_g1,c218693_g1,c225806_g2,c229565_g1,c267122_g1,c267394_g1,c320579_g1,c84163_g1,c84163_g2,c87543_g1	CC	5.2e-11	1.378e-09	17	19	3
GO:0000502	proteasome complex	c131732_g1,c144266_g1,c149557_g1,c153248_g1,c174478_g1,c177087_g1,c186467_g1,c187091_g1,c187298_g1,c190059_g1,c195598_g1,c197144_g1,c203335_g1,c213487_g1,c21401_g1,c21401_g2,c21408_g1,c214254_g1,c216451_g1,c218693_g1,c225806_g2,c229565_g1,c229981_g1,c267122_g1,c267394_g1,c320579_g1,c84163_g1,c84163_g2,c87312_g1,c87543_g1	CC	6.3e-11	8.3475e-10	30	49	4
GO:1905368	peptidase complex	c131732_g1,c144266_g1,c149557_g1,c153248_g1,c174478_g1,c177087_g1,c186467_g1,c187091_g1,c187298_g1,c190059_g1,c195598_g1,c197144_g1,c203335_g1,c213487_g1,c21401_g1,c21401_g2,c21408_g1,c214254_g1,c216451_g1,c218693_g1,c225806_g2,c229565_g1,c229981_g1,c267122_g1,c267394_g1,c320579_g1,c84163_g1,c84163_g2,c87312_g1,c87543_g1	CC	6.3e-11	8.3475e-10	30	49	4
GO:1905369	endopeptidase complex	c131732_g1,c144266_g1,c149557_g1,c153248_g1,c174478_g1,c177087_g1,c186467_g1,c187091_g1,c187298_g1,c190059_g1,c195598_g1,c197144_g1,c203335_g1,c213487_g1,c21401_g1,c21401_g2,c21408_g1,c214254_g1,c216451_g1,c218693_g1,c225806_g2,c229565_g1,c229981_g1,c267122_g1,c267394_g1,c320579_g1,c84163_g1,c84163_g2,c87312_g1,c87543_g1	CC	6.3e-11	8.3475e-10	30	49	5
GO:0044429	mitochondrial part	c109806_g1,c130963_g1,c131273_g1,c131737_g1,c136974_g1,c137210_g1,c139238_g1,c140023_g1,c146942_g1,c148313_g1,c148365_g1,c153217_g1,c160544_g1,c161071_g1,c169523_g1,c171975_g1,c174815_g1,c175946_g1,c176856_g1,c180332_g1,c180600_g1,c181371_g1,c183003_g1,c183815_g1,c183933_g1,c186651_g1,c187857_g1,c190460_g1,c190600_g1,c197137_g1,c197267_g1,c198040_g1,c201069_g1,c201133_g1,c201150_g1,c203983_g1,c20…	CC	3.5e-10	3.09167e-09	81	223	4
GO:0005840	ribosome	c101263_g1,c101517_g1,c111203_g1,c13108_g1,c137441_g1,c137599_g1,c137688_g1,c138483_g1,c144722_g1,c146116_g1,c148169_g1,c154384_g1,c155419_g1,c169682_g1,c170822_g1,c173689_g1,c176898_g1,c179943_g1,c181106_g1,c181278_g1,c190157_g1,c196850_g1,c199638_g1,c201951_g1,c202447_g1,c205777_g1,c205918_g1,c210352_g1,c21368_g1,c216056_g1,c218301_g5,c222989_g12,c224371_g2,c226472_g1,c227172_g4,c227388_g6,c229…	CC	3.5e-07	2.65e-06	54	149	5
GO:0044444	cytoplasmic part	c101263_g1,c101316_g1,c101517_g1,c101655_g1,c101862_g1,c102055_g1,c102060_g1,c102274_g1,c103118_g1,c108772_g1,c108834_g2,c108853_g1,c108871_g1,c109154_g1,c109806_g1,c110032_g1,c110032_g2,c111203_g1,c125359_g1,c126221_g1,c126236_g1,c130202_g1,c130240_g1,c130388_g1,c130963_g1,c13108_g1,c131273_g1,c131667_g1,c131737_g1,c132005_g1,c135399_g1,c136974_g1,c136980_g1,c137210_g1,c137441_g1,c137472_g1,c137…	CC	4.3e-07	2.84875e-06	694	3247	4
GO:0019773	proteasome core complex, alpha-subunit complex	c144266_g1,c177087_g1,c186467_g1,c203335_g1,c225806_g2,c229565_g1,c267394_g1,c320579_g1,c84163_g1,c84163_g2	CC	5.1e-07	3.00333e-06	10	11	3
GO:1902494	catalytic complex	c131732_g1,c131890_g1,c140023_g1,c144266_g1,c149557_g1,c153248_g1,c161750_g1,c174478_g1,c176474_g1,c177087_g1,c186467_g1,c187091_g1,c187298_g1,c190059_g1,c195598_g1,c197144_g1,c203335_g1,c204101_g1,c212673_g1,c213487_g1,c21401_g1,c21401_g2,c21408_g1,c214254_g1,c216451_g1,c218693_g1,c219911_g2,c221717_g2,c222285_g5,c223273_g7,c225806_g2,c229565_g1,c229981_g1,c250546_g1,c267122_g1,c267394_g1,c32057…	CC	9.8e-07	5.194e-06	41	105	3
GO:0005740	mitochondrial envelope	c109806_g1,c130963_g1,c131273_g1,c131737_g1,c136974_g1,c137210_g1,c146942_g1,c148313_g1,c148365_g1,c153217_g1,c160544_g1,c161071_g1,c169523_g1,c171975_g1,c174815_g1,c175946_g1,c176856_g1,c180332_g1,c180600_g1,c181371_g1,c183003_g1,c187857_g1,c190460_g1,c197137_g1,c197267_g1,c198040_g1,c201069_g1,c201150_g1,c203983_g1,c204191_g1,c204298_g1,c204850_g1,c205642_g1,c205642_g2,c208164_g1,c210293_g1,c21…	CC	1.4e-06	6.74545e-06	60	178	5
GO:0005743	mitochondrial inner membrane	c109806_g1,c130963_g1,c131273_g1,c131737_g1,c137210_g1,c146942_g1,c148313_g1,c153217_g1,c160544_g1,c169523_g1,c171975_g1,c174815_g1,c180332_g1,c180600_g1,c181371_g1,c183003_g1,c197137_g1,c198040_g1,c201069_g1,c203983_g1,c204191_g1,c204298_g1,c204850_g1,c205642_g1,c205642_g2,c208164_g1,c210293_g1,c211423_g1,c213917_g5,c21479_g1,c214979_g6,c215735_g5,c217065_g1,c218822_g1,c219812_g1,c220354_g3,c224…	CC	2.6e-06	1.14833e-05	46	127	5
GO:0019866	organelle inner membrane	c109806_g1,c130963_g1,c131273_g1,c131737_g1,c137210_g1,c146942_g1,c148313_g1,c153217_g1,c160544_g1,c169523_g1,c171975_g1,c174815_g1,c180332_g1,c180600_g1,c181371_g1,c183003_g1,c197137_g1,c198040_g1,c199584_g1,c201069_g1,c203611_g1,c203983_g1,c204191_g1,c204298_g1,c204850_g1,c205616_g1,c205642_g1,c205642_g2,c208164_g1,c210293_g1,c211423_g1,c213917_g5,c214047_g1,c21479_g1,c214979_g6,c215735_g5,c217…	CC	3.8e-06	1.54923e-05	59	179	4
GO:0005739	mitochondrion	c109806_g1,c130963_g1,c131273_g1,c131737_g1,c136974_g1,c137210_g1,c137472_g1,c139238_g1,c140023_g1,c146942_g1,c148313_g1,c148365_g1,c148454_g1,c153217_g1,c154738_g1,c160544_g1,c160972_g1,c161071_g1,c161087_g1,c161865_g1,c162045_g1,c162045_g2,c168417_g1,c16867_g1,c169523_g1,c170631_g1,c171330_g2,c171330_g3,c171975_g1,c174533_g1,c174815_g1,c175946_g1,c176856_g1,c176951_g1,c177014_g1,c178420_g1,c179…	CC	7.5e-06	2.83929e-05	153	592	5
GO:0031966	mitochondrial membrane	c109806_g1,c130963_g1,c131273_g1,c131737_g1,c136974_g1,c137210_g1,c146942_g1,c148313_g1,c153217_g1,c160544_g1,c169523_g1,c171975_g1,c174815_g1,c175946_g1,c176856_g1,c180332_g1,c180600_g1,c181371_g1,c183003_g1,c190460_g1,c197137_g1,c198040_g1,c201069_g1,c201150_g1,c203983_g1,c204191_g1,c204298_g1,c204850_g1,c205642_g1,c205642_g2,c208164_g1,c210293_g1,c211423_g1,c213917_g5,c21479_g1,c214979_g6,c215…	CC	1e-05	3.53333e-05	56	172	4
GO:0005759	mitochondrial matrix	c139238_g1,c140023_g1,c183815_g1,c183933_g1,c186651_g1,c190600_g1,c201133_g1,c204369_g2,c210299_g3,c219549_g1,c219549_g2,c219732_g1,c219812_g1,c221451_g4,c22343_g2,c225693_g3,c226142_g2,c226869_g1,c230462_g1,c232271_g1,c25404_g1,c39699_g1	CC	1.7e-05	5.63125e-05	22	48	5
GO:0019774	proteasome core complex, beta-subunit complex	c187091_g1,c195598_g1,c213487_g1,c214254_g1,c218693_g1,c267122_g1,c87543_g1	CC	5.6e-05	0.000174588	7	8	3
GO:0032991	protein-containing complex	c101263_g1,c101517_g1,c111203_g1,c13108_g1,c131732_g1,c131890_g1,c132401_g1,c137210_g1,c137441_g1,c137567_g1,c137599_g1,c137688_g1,c138483_g1,c140023_g1,c144266_g1,c144722_g1,c146116_g1,c148169_g1,c148313_g1,c148596_g1,c149557_g1,c153248_g1,c153663_g1,c154384_g1,c155419_g1,c156548_g1,c160544_g1,c161167_g1,c161750_g1,c169523_g1,c169682_g1,c170822_g1,c173689_g1,c174478_g1,c174612_g1,c174774_g1,c174…	CC	5.7e-05	0.000167833	145	576	2
GO:0046930	pore complex	c161167_g1,c175946_g1,c190460_g1,c213433_g2,c267131_g1,c39821_g1,c73170_g1	CC	0.0014	0.00390526	7	11	4
GO:0005622	intracellular	c100837_g1,c101263_g1,c101316_g1,c101482_g2,c101517_g1,c101655_g1,c101862_g1,c102055_g1,c102060_g1,c102274_g1,c103118_g1,c108772_g1,c108834_g2,c108837_g1,c108853_g1,c108871_g1,c108880_g1,c109154_g1,c109709_g1,c109806_g1,c110032_g1,c110032_g2,c111203_g1,c116947_g1,c120314_g1,c125359_g1,c126221_g1,c126236_g1,c128775_g1,c130202_g1,c130240_g1,c130388_g1,c130682_g1,c130690_g1,c130963_g1,c130965_g1,c13…	CC	0.0018	0.00454286	1038	5280	3
GO:0044424	intracellular part	c100837_g1,c101263_g1,c101316_g1,c101482_g2,c101517_g1,c101655_g1,c101862_g1,c102055_g1,c102060_g1,c102274_g1,c103118_g1,c108772_g1,c108834_g2,c108837_g1,c108853_g1,c108871_g1,c108880_g1,c109154_g1,c109709_g1,c109806_g1,c110032_g1,c110032_g2,c111203_g1,c116947_g1,c120314_g1,c125359_g1,c126221_g1,c126236_g1,c128775_g1,c130202_g1,c130240_g1,c130388_g1,c130682_g1,c130690_g1,c130963_g1,c130965_g1,c13…	CC	0.0018	0.00454286	1038	5280	3
GO:0005576	extracellular region	c100806_g1,c100976_g1,c130781_g1,c139553_g1,c144142_g1,c146118_g2,c154678_g1,c156709_g1,c157045_g1,c160967_g1,c1728_g1,c176603_g1,c184585_g1,c187068_g1,c187273_g1,c190607_g1,c190722_g1,c195204_g1,c197125_g2,c197282_g1,c197371_g1,c197593_g2,c198912_g1,c199877_g1,c200099_g1,c201088_g1,c204933_g1,c205298_g1,c206019_g1,c206854_g1,c208278_g1,c208311_g1,c208872_g2,c210076_g1,c210282_g2,c210319_g2,c2107…	CC	0.0018	0.00454286	101	411	2
GO:0031090	organelle membrane	c101862_g1,c102060_g1,c108772_g1,c108853_g1,c109806_g1,c130202_g1,c130240_g1,c130963_g1,c131273_g1,c131667_g1,c131737_g1,c132005_g1,c136974_g1,c136980_g1,c137210_g1,c14434_g1,c144571_g1,c146942_g1,c148313_g1,c152081_g1,c153217_g1,c156305_g1,c157045_g1,c157250_g1,c160544_g1,c161167_g1,c162695_g1,c165956_g1,c167071_g1,c169467_g1,c169523_g1,c169637_g1,c169640_g1,c169800_g1,c170942_g1,c171975_g1,c172…	CC	0.0019	0.00437826	226	1016	3
GO:0070469	respiratory chain	c131273_g1,c131737_g1,c148313_g1,c148365_g1,c174815_g1,c180600_g1,c181371_g1,c204191_g1,c211423_g1,c22343_g2,c225652_g2,c232288_g1,c285121_g1,c320566_g1,c6842_g1	CC	0.0033	0.0072875	15	39	3
GO:1990904	ribonucleoprotein complex	c101263_g1,c101517_g1,c111203_g1,c13108_g1,c137441_g1,c137567_g1,c137599_g1,c137688_g1,c138483_g1,c144722_g1,c146116_g1,c148169_g1,c148596_g1,c153663_g1,c154384_g1,c155419_g1,c156548_g1,c169682_g1,c170822_g1,c173689_g1,c176898_g1,c179943_g1,c180474_g1,c180474_g2,c181106_g1,c181278_g1,c190157_g1,c196760_g1,c196850_g1,c199638_g1,c201385_g1,c201951_g1,c202447_g1,c205777_g1,c205918_g1,c206721_g1,c210…	CC	0.0035	0.00742	65	252	3
GO:0098805	whole membrane	c101862_g1,c108772_g1,c131667_g1,c132005_g1,c136974_g1,c136980_g1,c152081_g1,c156305_g1,c157045_g1,c157250_g1,c161167_g1,c169637_g1,c169640_g1,c173707_g2,c174434_g1,c174489_g1,c175921_g1,c175946_g1,c177924_g3,c179404_g2,c180363_g1,c180810_g1,c180810_g2,c180960_g1,c182497_g1,c185089_g1,c185996_g1,c187199_g1,c187783_g1,c187939_g1,c190460_g1,c190584_g1,c196763_g1,c197596_g1,c198919_g1,c199449_g1,c20…	CC	0.0043	0.00876538	86	351	3
GO:0031967	organelle envelope	c109806_g1,c130240_g1,c130963_g1,c131273_g1,c131737_g1,c136974_g1,c136980_g1,c137210_g1,c146942_g1,c148313_g1,c148365_g1,c153217_g1,c160544_g1,c161071_g1,c161167_g1,c169523_g1,c171975_g1,c174612_g1,c174815_g1,c175946_g1,c176856_g1,c180332_g1,c180600_g1,c181320_g1,c181371_g1,c183003_g1,c187857_g1,c190460_g1,c192573_g1,c193467_g1,c194668_g1,c196469_g2,c197137_g1,c197220_g1,c197267_g1,c198040_g1,c19…	CC	0.0052	0.0100218	106	448	4
GO:0031975	envelope	c109806_g1,c130240_g1,c130963_g1,c131273_g1,c131737_g1,c136974_g1,c136980_g1,c137210_g1,c146942_g1,c148313_g1,c148365_g1,c153217_g1,c160544_g1,c161071_g1,c161167_g1,c169523_g1,c171975_g1,c174612_g1,c174815_g1,c175946_g1,c176856_g1,c180332_g1,c180600_g1,c181320_g1,c181371_g1,c183003_g1,c187857_g1,c190460_g1,c192573_g1,c193467_g1,c194668_g1,c196469_g2,c197137_g1,c197220_g1,c197267_g1,c198040_g1,c19…	CC	0.0052	0.0100218	106	448	3
GO:0005777	peroxisome	c108772_g1,c150469_g1,c169632_g1,c175921_g1,c180363_g1,c187939_g1,c190584_g1,c196877_g1,c197329_g1,c204873_g1,c209179_g1,c209415_g1,c209581_g1,c213849_g1,c214192_g1,c218761_g1,c219812_g1,c221519_g3,c221650_g3,c221650_g4,c222186_g6,c222295_g1,c224322_g1,c226707_g1,c228179_g3,c230856_g4,c232599_g1,c267532_g1,c87372_g1,c87405_g1	CC	0.0073	0.0131153	30	103	6
GO:0042579	microbody	c108772_g1,c150469_g1,c169632_g1,c175921_g1,c180363_g1,c187939_g1,c190584_g1,c196877_g1,c197329_g1,c204873_g1,c209179_g1,c209415_g1,c209581_g1,c213849_g1,c214192_g1,c218761_g1,c219812_g1,c221519_g3,c221650_g3,c221650_g4,c222186_g6,c222295_g1,c224322_g1,c226707_g1,c228179_g3,c230856_g4,c232599_g1,c267532_g1,c87372_g1,c87405_g1	CC	0.0073	0.0131153	30	103	5
GO:0005774	vacuolar membrane	c101862_g1,c131667_g1,c152081_g1,c157045_g1,c157250_g1,c169637_g1,c169640_g1,c173707_g2,c174434_g1,c174489_g1,c177924_g3,c182497_g1,c185089_g1,c187199_g1,c187783_g1,c196763_g1,c197596_g1,c199449_g1,c201026_g1,c205910_g1,c209237_g1,c212350_g2,c212989_g1,c21573_g2,c217325_g1,c217491_g1,c219999_g2,c221124_g1,c224527_g1,c224674_g5,c227685_g2,c229272_g1,c229949_g1,c267240_g1,c284982_g1,c42423_g1,c4359…	CC	0.0148	0.0253032	39	148	4
GO:0044437	vacuolar part	c101862_g1,c131667_g1,c152081_g1,c157045_g1,c157250_g1,c169637_g1,c169640_g1,c173707_g2,c174434_g1,c174489_g1,c177924_g3,c182497_g1,c185089_g1,c187199_g1,c187783_g1,c196763_g1,c197596_g1,c199449_g1,c201026_g1,c205910_g1,c209237_g1,c212350_g2,c212989_g1,c21573_g2,c217325_g1,c217491_g1,c218979_g1,c219999_g2,c221124_g1,c224527_g1,c224674_g5,c227685_g2,c229272_g1,c229949_g1,c267240_g1,c284982_g1,c424…	CC	0.0156	0.0258375	40	153	4
GO:0005778	peroxisomal membrane	c108772_g1,c175921_g1,c180363_g1,c187939_g1,c190584_g1,c222295_g1,c226707_g1,c228179_g3,c232599_g1,c267532_g1	CC	0.0205	0.0324328	10	27	5
GO:0031903	microbody membrane	c108772_g1,c175921_g1,c180363_g1,c187939_g1,c190584_g1,c222295_g1,c226707_g1,c228179_g3,c232599_g1,c267532_g1	CC	0.0205	0.0324328	10	27	4
GO:0048046	apoplast	c130781_g1,c156709_g1,c1728_g1,c190607_g1,c198912_g1,c204933_g1,c208278_g1,c208872_g2,c210794_g7,c212329_g1,c215302_g2,c217123_g2,c217352_g2,c221627_g1,c222344_g3,c222769_g1,c222769_g2,c228135_g1,c228135_g2,c228135_g3,c303677_g1	CC	0.022	0.0333143	21	72	3
GO:0005793	endoplasmic reticulum-Golgi intermediate compartment	c102060_g1,c165956_g1,c231692_g2	CC	0.023	0.0329459	3	4	5
GO:0032585	multivesicular body membrane	c156305_g1,c213209_g1,c213209_g3	CC	0.023	0.0329459	3	4	6
GO:0033116	endoplasmic reticulum-Golgi intermediate compartment membrane	c102060_g1,c165956_g1,c231692_g2	CC	0.023	0.0329459	3	4	5
GO:0044422	organelle part	c101655_g1,c101862_g1,c102060_g1,c108772_g1,c108853_g1,c109806_g1,c110032_g1,c110032_g2,c126236_g1,c128775_g1,c130202_g1,c130240_g1,c130388_g1,c130963_g1,c131273_g1,c131667_g1,c131737_g1,c131890_g1,c132005_g1,c132401_g1,c135399_g1,c136974_g1,c136980_g1,c137210_g1,c137270_g1,c137311_g1,c137567_g1,c138498_g1,c139238_g1,c140023_g1,c143883_g1,c144222_g1,c14434_g1,c144571_g1,c146942_g1,c148313_g1,c148…	CC	0.0237	0.0322077	440	2170	2
GO:0044446	intracellular organelle part	c101655_g1,c101862_g1,c102060_g1,c108772_g1,c108853_g1,c109806_g1,c110032_g1,c110032_g2,c126236_g1,c128775_g1,c130202_g1,c130240_g1,c130388_g1,c130963_g1,c131273_g1,c131667_g1,c131737_g1,c131890_g1,c132005_g1,c132401_g1,c135399_g1,c136974_g1,c136980_g1,c137210_g1,c137270_g1,c137311_g1,c137567_g1,c138498_g1,c139238_g1,c140023_g1,c143883_g1,c144222_g1,c14434_g1,c144571_g1,c146942_g1,c148313_g1,c148…	CC	0.0264	0.03498	437	2158	3
GO:0044438	microbody part	c108772_g1,c175921_g1,c180363_g1,c187939_g1,c190584_g1,c222295_g1,c226707_g1,c228179_g3,c232599_g1,c267532_g1	CC	0.0267	0.0340988	10	28	4
GO:0044439	peroxisomal part	c108772_g1,c175921_g1,c180363_g1,c187939_g1,c190584_g1,c222295_g1,c226707_g1,c228179_g3,c232599_g1,c267532_g1	CC	0.0267	0.0340988	10	28	5
GO:0044421	extracellular region part	c160967_g1,c187068_g1,c197125_g2,c216898_g1,c218941_g1,c219130_g2,c221330_g1,c225946_g4,c226840_g4,c229757_g1,c231543_g2	CC	0.0344	0.0424	11	33	2
GO:0005578	proteinaceous extracellular matrix	c160967_g1,c197125_g2,c218941_g1,c221330_g1,c229757_g1	CC	0.04	0.0476404	5	11	4
GO:0031012	extracellular matrix	c160967_g1,c197125_g2,c218941_g1,c221330_g1,c229757_g1	CC	0.04	0.0476404	5	11	3
GO:0030662	coated vesicle membrane	c180810_g1,c180810_g2,c203610_g1,c214661_g5,c225789_g2,c227744_g3,c6149_g1,c73817_g2,c99398_g1	CC	0.0424	0.0488522	9	26	4
GO:0005773	vacuole	c101862_g1,c131667_g1,c152081_g1,c157045_g1,c157250_g1,c169637_g1,c169640_g1,c169674_g1,c173707_g2,c174434_g1,c174489_g1,c177924_g3,c182497_g1,c183886_g1,c184727_g1,c185089_g1,c187199_g1,c187783_g1,c196763_g1,c197596_g1,c198912_g1,c199102_g1,c199449_g1,c199822_g1,c199822_g2,c200094_g1,c201026_g1,c205910_g1,c209237_g1,c212350_g2,c212989_g1,c21573_g2,c216279_g1,c217325_g1,c217491_g1,c218979_g1,c219…	CC	0.0451	0.0508574	51	216	5
GO:0008180	COP9 signalosome	c174774_g1,c178321_g1,c195685_g1,c228592_g2	CC	0.0463	0.0511229	4	8	3
GO:0016469	proton-transporting two-sector ATPase complex	c137210_g1,c160544_g1,c169523_g1,c185622_g1,c198040_g1,c204298_g1	CC	0.0473	0.0506444	6	15	4
GO:0045259	proton-transporting ATP synthase complex	c137210_g1,c160544_g1,c169523_g1,c185622_g1,c198040_g1,c204298_g1	CC	0.0473	0.0506444	6	15	4
GO:0005771	multivesicular body	c156305_g1,c213209_g1,c213209_g3	CC	0.0495	0.0504519	3	5	6
GO:0045273	respiratory chain complex II	c148313_g1,c174815_g1,c211423_g1	CC	0.0495	0.0504519	3	5	4
GO:0098803	respiratory chain complex	c148313_g1,c174815_g1,c211423_g1	CC	0.0495	0.0504519	3	5	4

## Sheet: DS3_Up
GO_accession	Description	GeneNames	Ontology	pValue	qValue	fg	bg	GO_level
GO:0034404	nucleobase-containing small molecule biosynthetic process	c110032_g1,c110032_g2,c140023_g1,c151047_g2,c153259_g1,c154301_g2,c158643_g1,c162291_g1,c173745_g1,c197145_g1,c197168_g1,c199516_g1,c199759_g1,c199794_g1,c206088_g1,c208395_g1,c210609_g1,c211285_g1,c212216_g1,c212216_g2,c21544_g1,c220308_g1,c224117_g2,c224117_g8,c225822_g3,c230462_g1,c35949_g1	BP	1.7e-09	3.111e-07	27	82	5
GO:0044281	small molecule metabolic process	c110032_g1,c110032_g2,c130388_g1,c130963_g1,c131861_g1,c137532_g2,c140023_g1,c144184_g1,c146942_g1,c148313_g1,c151047_g2,c153259_g1,c154301_g2,c154738_g1,c156181_g1,c158643_g1,c160544_g1,c162291_g1,c170920_g1,c173745_g1,c173863_g1,c177014_g1,c178792_g1,c181035_g1,c183933_g1,c184713_g1,c185526_g1,c185968_g1,c186154_g1,c190716_g1,c193921_g1,c196877_g1,c196911_g1,c197102_g1,c197145_g1,c197168_g1,c19…	BP	7.5e-09	6.8625e-07	116	760	3
GO:0017144	drug metabolic process	c110032_g1,c110032_g2,c140023_g1,c146942_g1,c148313_g1,c148995_g2,c151047_g2,c154301_g2,c154738_g1,c156181_g1,c158643_g1,c160544_g1,c162291_g1,c172396_g1,c173745_g1,c177014_g1,c183933_g1,c190716_g1,c193411_g2,c197168_g1,c199516_g1,c199759_g1,c199794_g1,c204298_g1,c205182_g1,c205205_g1,c206088_g1,c207742_g1,c208395_g1,c208697_g1,c210282_g2,c210325_g1,c210609_g1,c211285_g1,c212216_g1,c212216_g2,c21…	BP	2.7e-08	1.647e-06	60	316	4
GO:0009156	ribonucleoside monophosphate biosynthetic process	c110032_g1,c110032_g2,c140023_g1,c146942_g1,c151047_g2,c153259_g1,c154301_g2,c158643_g1,c160544_g1,c162291_g1,c173745_g1,c197145_g1,c197168_g1,c199516_g1,c199759_g1,c199794_g1,c204298_g1,c206088_g1,c208395_g1,c210609_g1,c211285_g1,c212216_g1,c212216_g2,c21544_g1,c220308_g1,c223768_g3,c225822_g3,c230462_g1,c35949_g1	BP	7.6e-08	2.7816e-06	29	108	8
GO:0009161	ribonucleoside monophosphate metabolic process	c110032_g1,c110032_g2,c140023_g1,c146942_g1,c151047_g2,c153259_g1,c154301_g2,c158643_g1,c160544_g1,c162291_g1,c173745_g1,c197145_g1,c197168_g1,c199516_g1,c199759_g1,c199794_g1,c204298_g1,c206088_g1,c208395_g1,c210609_g1,c211285_g1,c212216_g1,c212216_g2,c21544_g1,c220308_g1,c223768_g3,c225822_g3,c230462_g1,c35949_g1	BP	7.6e-08	2.7816e-06	29	108	7
GO:0072522	purine-containing compound biosynthetic process	c110032_g1,c110032_g2,c140023_g1,c146942_g1,c151047_g2,c154301_g2,c158643_g1,c160544_g1,c162291_g1,c173745_g1,c197168_g1,c199516_g1,c199759_g1,c199794_g1,c204298_g1,c206088_g1,c208395_g1,c210609_g1,c211285_g1,c212216_g1,c212216_g2,c21544_g1,c220308_g1,c223768_g3,c224117_g2,c224117_g8,c230462_g1,c35949_g1	BP	7.6e-08	2.7816e-06	28	102	6
GO:0005996	monosaccharide metabolic process	c110032_g1,c110032_g2,c131861_g1,c170920_g1,c181035_g1,c184713_g1,c196911_g1,c199794_g1,c2005_g1,c206088_g1,c210398_g1,c212088_g1,c212216_g1,c212216_g2,c217361_g1,c217361_g2,c217836_g1,c227698_g1	BP	9.5e-08	2.48357e-06	18	48	4
GO:0055086	nucleobase-containing small molecule metabolic process	c110032_g1,c110032_g2,c131861_g1,c140023_g1,c146942_g1,c151047_g2,c153259_g1,c154301_g2,c158643_g1,c160544_g1,c162291_g1,c173745_g1,c186154_g1,c197145_g1,c197168_g1,c197267_g1,c199516_g1,c199759_g1,c199794_g1,c200690_g1,c204298_g1,c205703_g1,c206088_g1,c208395_g1,c210398_g1,c210609_g1,c211285_g1,c212216_g1,c212216_g2,c213620_g1,c21544_g1,c217836_g1,c220308_g1,c223768_g3,c224117_g2,c224117_g8,c225…	BP	1e-07	2.2875e-06	43	202	4
GO:0009123	nucleoside monophosphate metabolic process	c110032_g1,c110032_g2,c140023_g1,c146942_g1,c151047_g2,c153259_g1,c154301_g2,c158643_g1,c160544_g1,c162291_g1,c173745_g1,c197145_g1,c197168_g1,c199516_g1,c199759_g1,c199794_g1,c204298_g1,c206088_g1,c208395_g1,c210609_g1,c211285_g1,c212216_g1,c212216_g2,c21544_g1,c220308_g1,c223768_g3,c225822_g3,c230462_g1,c35949_g1	BP	1.2e-07	1.90957e-06	29	110	6
GO:0009124	nucleoside monophosphate biosynthetic process	c110032_g1,c110032_g2,c140023_g1,c146942_g1,c151047_g2,c153259_g1,c154301_g2,c158643_g1,c160544_g1,c162291_g1,c173745_g1,c197145_g1,c197168_g1,c199516_g1,c199759_g1,c199794_g1,c204298_g1,c206088_g1,c208395_g1,c210609_g1,c211285_g1,c212216_g1,c212216_g2,c21544_g1,c220308_g1,c223768_g3,c225822_g3,c230462_g1,c35949_g1	BP	1.2e-07	1.90957e-06	29	110	7
GO:0009126	purine nucleoside monophosphate metabolic process	c110032_g1,c110032_g2,c140023_g1,c146942_g1,c151047_g2,c154301_g2,c158643_g1,c160544_g1,c162291_g1,c173745_g1,c197168_g1,c199516_g1,c199759_g1,c199794_g1,c204298_g1,c206088_g1,c208395_g1,c210609_g1,c211285_g1,c212216_g1,c212216_g2,c21544_g1,c220308_g1,c223768_g3,c230462_g1,c35949_g1	BP	1.2e-07	1.90957e-06	26	92	7
GO:0009127	purine nucleoside monophosphate biosynthetic process	c110032_g1,c110032_g2,c140023_g1,c146942_g1,c151047_g2,c154301_g2,c158643_g1,c160544_g1,c162291_g1,c173745_g1,c197168_g1,c199516_g1,c199759_g1,c199794_g1,c204298_g1,c206088_g1,c208395_g1,c210609_g1,c211285_g1,c212216_g1,c212216_g2,c21544_g1,c220308_g1,c223768_g3,c230462_g1,c35949_g1	BP	1.2e-07	1.90957e-06	26	92	8
GO:0009167	purine ribonucleoside monophosphate metabolic process	c110032_g1,c110032_g2,c140023_g1,c146942_g1,c151047_g2,c154301_g2,c158643_g1,c160544_g1,c162291_g1,c173745_g1,c197168_g1,c199516_g1,c199759_g1,c199794_g1,c204298_g1,c206088_g1,c208395_g1,c210609_g1,c211285_g1,c212216_g1,c212216_g2,c21544_g1,c220308_g1,c223768_g3,c230462_g1,c35949_g1	BP	1.2e-07	1.90957e-06	26	92	8
GO:0009168	purine ribonucleoside monophosphate biosynthetic process	c110032_g1,c110032_g2,c140023_g1,c146942_g1,c151047_g2,c154301_g2,c158643_g1,c160544_g1,c162291_g1,c173745_g1,c197168_g1,c199516_g1,c199759_g1,c199794_g1,c204298_g1,c206088_g1,c208395_g1,c210609_g1,c211285_g1,c212216_g1,c212216_g2,c21544_g1,c220308_g1,c223768_g3,c230462_g1,c35949_g1	BP	1.2e-07	1.90957e-06	26	92	9
GO:0009199	ribonucleoside triphosphate metabolic process	c110032_g1,c110032_g2,c140023_g1,c146942_g1,c151047_g2,c154301_g2,c158643_g1,c160544_g1,c197168_g1,c199516_g1,c199759_g1,c199794_g1,c204298_g1,c206088_g1,c210609_g1,c211285_g1,c212216_g1,c212216_g2,c21544_g1,c220308_g1,c225822_g3,c230462_g1,c35949_g1	BP	2.1e-07	2.47935e-06	23	77	7
GO:0009201	ribonucleoside triphosphate biosynthetic process	c110032_g1,c110032_g2,c140023_g1,c146942_g1,c151047_g2,c154301_g2,c158643_g1,c160544_g1,c197168_g1,c199516_g1,c199759_g1,c199794_g1,c204298_g1,c206088_g1,c210609_g1,c211285_g1,c212216_g1,c212216_g2,c21544_g1,c220308_g1,c225822_g3,c230462_g1,c35949_g1	BP	2.1e-07	2.47935e-06	23	77	8
GO:0009259	ribonucleotide metabolic process	c110032_g1,c110032_g2,c140023_g1,c146942_g1,c151047_g2,c153259_g1,c154301_g2,c158643_g1,c160544_g1,c162291_g1,c173745_g1,c197145_g1,c197168_g1,c199516_g1,c199759_g1,c199794_g1,c204298_g1,c206088_g1,c208395_g1,c210609_g1,c211285_g1,c212216_g1,c212216_g2,c21544_g1,c220308_g1,c223768_g3,c225822_g3,c230462_g1,c35949_g1	BP	2.7e-07	2.60053e-06	29	114	6
GO:0009260	ribonucleotide biosynthetic process	c110032_g1,c110032_g2,c140023_g1,c146942_g1,c151047_g2,c153259_g1,c154301_g2,c158643_g1,c160544_g1,c162291_g1,c173745_g1,c197145_g1,c197168_g1,c199516_g1,c199759_g1,c199794_g1,c204298_g1,c206088_g1,c208395_g1,c210609_g1,c211285_g1,c212216_g1,c212216_g2,c21544_g1,c220308_g1,c223768_g3,c225822_g3,c230462_g1,c35949_g1	BP	2.7e-07	2.60053e-06	29	114	7
GO:0046390	ribose phosphate biosynthetic process	c110032_g1,c110032_g2,c140023_g1,c146942_g1,c151047_g2,c153259_g1,c154301_g2,c158643_g1,c160544_g1,c162291_g1,c173745_g1,c197145_g1,c197168_g1,c199516_g1,c199759_g1,c199794_g1,c204298_g1,c206088_g1,c208395_g1,c210609_g1,c211285_g1,c212216_g1,c212216_g2,c21544_g1,c220308_g1,c223768_g3,c225822_g3,c230462_g1,c35949_g1	BP	2.7e-07	2.60053e-06	29	114	6
GO:0009141	nucleoside triphosphate metabolic process	c110032_g1,c110032_g2,c140023_g1,c146942_g1,c151047_g2,c154301_g2,c158643_g1,c160544_g1,c197168_g1,c199516_g1,c199759_g1,c199794_g1,c204298_g1,c206088_g1,c210609_g1,c211285_g1,c212216_g1,c212216_g2,c21544_g1,c220308_g1,c225822_g3,c230462_g1,c35949_g1	BP	2.7e-07	2.60053e-06	23	78	6
GO:0009142	nucleoside triphosphate biosynthetic process	c110032_g1,c110032_g2,c140023_g1,c146942_g1,c151047_g2,c154301_g2,c158643_g1,c160544_g1,c197168_g1,c199516_g1,c199759_g1,c199794_g1,c204298_g1,c206088_g1,c210609_g1,c211285_g1,c212216_g1,c212216_g2,c21544_g1,c220308_g1,c225822_g3,c230462_g1,c35949_g1	BP	2.7e-07	2.60053e-06	23	78	7
GO:0006091	generation of precursor metabolites and energy	c110032_g1,c110032_g2,c140023_g1,c148313_g1,c151047_g2,c154301_g2,c154738_g1,c158643_g1,c177014_g1,c183933_g1,c190716_g1,c197168_g1,c199516_g1,c199759_g1,c199794_g1,c206088_g1,c208697_g1,c210609_g1,c211285_g1,c212216_g1,c212216_g2,c213599_g2,c21544_g1,c219549_g1,c220308_g1,c230462_g1,c35949_g1,c39850_g1	BP	2.8e-07	2.32909e-06	28	108	4
GO:0006754	ATP biosynthetic process	c110032_g1,c110032_g2,c140023_g1,c146942_g1,c151047_g2,c154301_g2,c158643_g1,c160544_g1,c197168_g1,c199516_g1,c199759_g1,c199794_g1,c204298_g1,c206088_g1,c210609_g1,c211285_g1,c212216_g1,c212216_g2,c21544_g1,c220308_g1,c230462_g1,c35949_g1	BP	3.3e-07	2.36824e-06	22	73	6
GO:0009144	purine nucleoside triphosphate metabolic process	c110032_g1,c110032_g2,c140023_g1,c146942_g1,c151047_g2,c154301_g2,c158643_g1,c160544_g1,c197168_g1,c199516_g1,c199759_g1,c199794_g1,c204298_g1,c206088_g1,c210609_g1,c211285_g1,c212216_g1,c212216_g2,c21544_g1,c220308_g1,c230462_g1,c35949_g1	BP	3.3e-07	2.36824e-06	22	73	7
GO:0009145	purine nucleoside triphosphate biosynthetic process	c110032_g1,c110032_g2,c140023_g1,c146942_g1,c151047_g2,c154301_g2,c158643_g1,c160544_g1,c197168_g1,c199516_g1,c199759_g1,c199794_g1,c204298_g1,c206088_g1,c210609_g1,c211285_g1,c212216_g1,c212216_g2,c21544_g1,c220308_g1,c230462_g1,c35949_g1	BP	3.3e-07	2.36824e-06	22	73	8
GO:0009205	purine ribonucleoside triphosphate metabolic process	c110032_g1,c110032_g2,c140023_g1,c146942_g1,c151047_g2,c154301_g2,c158643_g1,c160544_g1,c197168_g1,c199516_g1,c199759_g1,c199794_g1,c204298_g1,c206088_g1,c210609_g1,c211285_g1,c212216_g1,c212216_g2,c21544_g1,c220308_g1,c230462_g1,c35949_g1	BP	3.3e-07	2.36824e-06	22	73	8
GO:0009206	purine ribonucleoside triphosphate biosynthetic process	c110032_g1,c110032_g2,c140023_g1,c146942_g1,c151047_g2,c154301_g2,c158643_g1,c160544_g1,c197168_g1,c199516_g1,c199759_g1,c199794_g1,c204298_g1,c206088_g1,c210609_g1,c211285_g1,c212216_g1,c212216_g2,c21544_g1,c220308_g1,c230462_g1,c35949_g1	BP	3.3e-07	2.36824e-06	22	73	9
GO:0046034	ATP metabolic process	c110032_g1,c110032_g2,c140023_g1,c146942_g1,c151047_g2,c154301_g2,c158643_g1,c160544_g1,c197168_g1,c199516_g1,c199759_g1,c199794_g1,c204298_g1,c206088_g1,c210609_g1,c211285_g1,c212216_g1,c212216_g2,c21544_g1,c220308_g1,c230462_g1,c35949_g1	BP	3.3e-07	2.36824e-06	22	73	5
GO:0019693	ribose phosphate metabolic process	c110032_g1,c110032_g2,c140023_g1,c146942_g1,c151047_g2,c153259_g1,c154301_g2,c158643_g1,c160544_g1,c162291_g1,c173745_g1,c197145_g1,c197168_g1,c199516_g1,c199759_g1,c199794_g1,c204298_g1,c206088_g1,c208395_g1,c210398_g1,c210609_g1,c211285_g1,c212216_g1,c212216_g2,c21544_g1,c220308_g1,c223768_g3,c225822_g3,c230462_g1,c35949_g1,c58352_g1	BP	3.4e-07	2.14552e-06	31	128	5
GO:0072521	purine-containing compound metabolic process	c110032_g1,c110032_g2,c140023_g1,c146942_g1,c151047_g2,c154301_g2,c158643_g1,c160544_g1,c162291_g1,c173745_g1,c197168_g1,c199516_g1,c199759_g1,c199794_g1,c204298_g1,c206088_g1,c208395_g1,c210609_g1,c211285_g1,c212216_g1,c212216_g2,c21544_g1,c220308_g1,c223768_g3,c224117_g2,c224117_g8,c230462_g1,c35949_g1	BP	3.5e-07	2.135e-06	28	109	5
GO:0006163	purine nucleotide metabolic process	c110032_g1,c110032_g2,c140023_g1,c146942_g1,c151047_g2,c154301_g2,c158643_g1,c160544_g1,c162291_g1,c173745_g1,c197168_g1,c199516_g1,c199759_g1,c199794_g1,c204298_g1,c206088_g1,c208395_g1,c210609_g1,c211285_g1,c212216_g1,c212216_g2,c21544_g1,c220308_g1,c223768_g3,c230462_g1,c35949_g1	BP	4.6e-07	2.59015e-06	26	98	6
GO:0006164	purine nucleotide biosynthetic process	c110032_g1,c110032_g2,c140023_g1,c146942_g1,c151047_g2,c154301_g2,c158643_g1,c160544_g1,c162291_g1,c173745_g1,c197168_g1,c199516_g1,c199759_g1,c199794_g1,c204298_g1,c206088_g1,c208395_g1,c210609_g1,c211285_g1,c212216_g1,c212216_g2,c21544_g1,c220308_g1,c223768_g3,c230462_g1,c35949_g1	BP	4.6e-07	2.59015e-06	26	98	7
GO:0009150	purine ribonucleotide metabolic process	c110032_g1,c110032_g2,c140023_g1,c146942_g1,c151047_g2,c154301_g2,c158643_g1,c160544_g1,c162291_g1,c173745_g1,c197168_g1,c199516_g1,c199759_g1,c199794_g1,c204298_g1,c206088_g1,c208395_g1,c210609_g1,c211285_g1,c212216_g1,c212216_g2,c21544_g1,c220308_g1,c223768_g3,c230462_g1,c35949_g1	BP	4.6e-07	2.59015e-06	26	98	7
GO:0009152	purine ribonucleotide biosynthetic process	c110032_g1,c110032_g2,c140023_g1,c146942_g1,c151047_g2,c154301_g2,c158643_g1,c160544_g1,c162291_g1,c173745_g1,c197168_g1,c199516_g1,c199759_g1,c199794_g1,c204298_g1,c206088_g1,c208395_g1,c210609_g1,c211285_g1,c212216_g1,c212216_g2,c21544_g1,c220308_g1,c223768_g3,c230462_g1,c35949_g1	BP	4.6e-07	2.59015e-06	26	98	8
GO:0006753	nucleoside phosphate metabolic process	c110032_g1,c110032_g2,c140023_g1,c146942_g1,c151047_g2,c153259_g1,c154301_g2,c158643_g1,c160544_g1,c162291_g1,c173745_g1,c186154_g1,c197145_g1,c197168_g1,c197267_g1,c199516_g1,c199759_g1,c199794_g1,c204298_g1,c206088_g1,c208395_g1,c210398_g1,c210609_g1,c211285_g1,c212216_g1,c212216_g2,c21544_g1,c220308_g1,c223768_g3,c225822_g3,c228671_g1,c229947_g1,c230462_g1,c35949_g1,c58352_g1	BP	7.2e-07	3.71155e-06	35	159	5
GO:0009117	nucleotide metabolic process	c110032_g1,c110032_g2,c140023_g1,c146942_g1,c151047_g2,c153259_g1,c154301_g2,c158643_g1,c160544_g1,c162291_g1,c173745_g1,c186154_g1,c197145_g1,c197168_g1,c197267_g1,c199516_g1,c199759_g1,c199794_g1,c204298_g1,c206088_g1,c208395_g1,c210398_g1,c210609_g1,c211285_g1,c212216_g1,c212216_g2,c21544_g1,c220308_g1,c223768_g3,c225822_g3,c228671_g1,c229947_g1,c230462_g1,c35949_g1,c58352_g1	BP	7.2e-07	3.71155e-06	35	159	6
GO:0006165	nucleoside diphosphate phosphorylation	c110032_g1,c110032_g2,c140023_g1,c151047_g2,c154301_g2,c158643_g1,c197168_g1,c199516_g1,c199759_g1,c199794_g1,c206088_g1,c210609_g1,c211285_g1,c212216_g1,c212216_g2,c21544_g1,c220308_g1,c230462_g1,c35949_g1	BP	9e-07	3.87529e-06	19	60	7
GO:0006757	ATP generation from ADP	c110032_g1,c110032_g2,c140023_g1,c151047_g2,c154301_g2,c158643_g1,c197168_g1,c199516_g1,c199759_g1,c199794_g1,c206088_g1,c210609_g1,c211285_g1,c212216_g1,c212216_g2,c21544_g1,c220308_g1,c230462_g1,c35949_g1	BP	9e-07	3.87529e-06	19	60	5
GO:0009132	nucleoside diphosphate metabolic process	c110032_g1,c110032_g2,c140023_g1,c151047_g2,c154301_g2,c158643_g1,c197168_g1,c199516_g1,c199759_g1,c199794_g1,c206088_g1,c210609_g1,c211285_g1,c212216_g1,c212216_g2,c21544_g1,c220308_g1,c230462_g1,c35949_g1	BP	9e-07	3.87529e-06	19	60	6
GO:0009135	purine nucleoside diphosphate metabolic process	c110032_g1,c110032_g2,c140023_g1,c151047_g2,c154301_g2,c158643_g1,c197168_g1,c199516_g1,c199759_g1,c199794_g1,c206088_g1,c210609_g1,c211285_g1,c212216_g1,c212216_g2,c21544_g1,c220308_g1,c230462_g1,c35949_g1	BP	9e-07	3.87529e-06	19	60	7
GO:0009166	nucleotide catabolic process	c110032_g1,c110032_g2,c140023_g1,c151047_g2,c154301_g2,c158643_g1,c197168_g1,c199516_g1,c199759_g1,c199794_g1,c206088_g1,c210609_g1,c211285_g1,c212216_g1,c212216_g2,c21544_g1,c220308_g1,c230462_g1,c35949_g1	BP	9e-07	3.87529e-06	19	60	7
GO:0009179	purine ribonucleoside diphosphate metabolic process	c110032_g1,c110032_g2,c140023_g1,c151047_g2,c154301_g2,c158643_g1,c197168_g1,c199516_g1,c199759_g1,c199794_g1,c206088_g1,c210609_g1,c211285_g1,c212216_g1,c212216_g2,c21544_g1,c220308_g1,c230462_g1,c35949_g1	BP	9e-07	3.87529e-06	19	60	8
GO:0009185	ribonucleoside diphosphate metabolic process	c110032_g1,c110032_g2,c140023_g1,c151047_g2,c154301_g2,c158643_g1,c197168_g1,c199516_g1,c199759_g1,c199794_g1,c206088_g1,c210609_g1,c211285_g1,c212216_g1,c212216_g2,c21544_g1,c220308_g1,c230462_g1,c35949_g1	BP	9e-07	3.87529e-06	19	60	7
GO:0042866	pyruvate biosynthetic process	c110032_g1,c110032_g2,c140023_g1,c151047_g2,c154301_g2,c158643_g1,c197168_g1,c199516_g1,c199759_g1,c199794_g1,c206088_g1,c210609_g1,c211285_g1,c212216_g1,c212216_g2,c21544_g1,c220308_g1,c230462_g1,c35949_g1	BP	9e-07	3.87529e-06	19	60	8
GO:0046031	ADP metabolic process	c110032_g1,c110032_g2,c140023_g1,c151047_g2,c154301_g2,c158643_g1,c197168_g1,c199516_g1,c199759_g1,c199794_g1,c206088_g1,c210609_g1,c211285_g1,c212216_g1,c212216_g2,c21544_g1,c220308_g1,c230462_g1,c35949_g1	BP	9e-07	3.87529e-06	19	60	8
GO:0046939	nucleotide phosphorylation	c110032_g1,c110032_g2,c140023_g1,c151047_g2,c154301_g2,c158643_g1,c197168_g1,c199516_g1,c199759_g1,c199794_g1,c206088_g1,c210609_g1,c211285_g1,c212216_g1,c212216_g2,c21544_g1,c220308_g1,c230462_g1,c35949_g1	BP	9e-07	3.87529e-06	19	60	7
GO:1901292	nucleoside phosphate catabolic process	c110032_g1,c110032_g2,c140023_g1,c151047_g2,c154301_g2,c158643_g1,c197168_g1,c199516_g1,c199759_g1,c199794_g1,c206088_g1,c210609_g1,c211285_g1,c212216_g1,c212216_g2,c21544_g1,c220308_g1,c230462_g1,c35949_g1	BP	9e-07	3.87529e-06	19	60	6
GO:0046434	organophosphate catabolic process	c110032_g1,c110032_g2,c140023_g1,c151047_g2,c154301_g2,c158643_g1,c197168_g1,c199516_g1,c199759_g1,c199794_g1,c206088_g1,c210609_g1,c211285_g1,c212216_g1,c212216_g2,c21544_g1,c220308_g1,c230462_g1,c35949_g1	BP	1.6e-06	5.97551e-06	19	62	5
GO:0005975	carbohydrate metabolic process	c10609_g1,c110032_g1,c110032_g2,c130963_g1,c131861_g1,c140023_g1,c151047_g2,c154301_g2,c158643_g1,c160967_g1,c161197_g1,c170920_g1,c173863_g1,c176736_g1,c181035_g1,c184713_g1,c193411_g2,c193921_g1,c196911_g1,c197009_g1,c197168_g1,c199516_g1,c199759_g1,c199794_g1,c199857_g1,c2005_g1,c201344_g1,c202700_g1,c205205_g1,c206088_g1,c207011_g1,c207335_g1,c207742_g1,c208396_g1,c208396_g2,c210282_g2,c21039…	BP	2.2e-06	8.052e-06	61	365	4
GO:0006732	coenzyme metabolic process	c110032_g1,c110032_g2,c140023_g1,c151047_g2,c154301_g2,c158643_g1,c170920_g1,c177014_g1,c186154_g1,c197168_g1,c199516_g1,c199759_g1,c199794_g1,c205001_g1,c205182_g1,c206088_g1,c210398_g1,c210609_g1,c211109_g1,c211285_g1,c212216_g1,c212216_g2,c214371_g7,c21544_g1,c217361_g1,c217361_g2,c220308_g1,c228671_g1,c229947_g1,c230462_g1,c231108_g4,c28036_g1,c302597_g1,c35949_g1,c58352_g1,c90003_g1	BP	3.6e-06	1.29176e-05	36	177	5
GO:0019318	hexose metabolic process	c110032_g1,c110032_g2,c131861_g1,c181035_g1,c184713_g1,c196911_g1,c199794_g1,c2005_g1,c206088_g1,c212088_g1,c212216_g1,c212216_g2,c227698_g1	BP	4.6e-06	1.61885e-05	13	34	5
GO:0009165	nucleotide biosynthetic process	c110032_g1,c110032_g2,c140023_g1,c146942_g1,c151047_g2,c153259_g1,c154301_g2,c158643_g1,c160544_g1,c162291_g1,c173745_g1,c186154_g1,c197145_g1,c197168_g1,c199516_g1,c199759_g1,c199794_g1,c204298_g1,c206088_g1,c208395_g1,c210609_g1,c211285_g1,c212216_g1,c212216_g2,c21544_g1,c220308_g1,c223768_g3,c225822_g3,c230462_g1,c35949_g1	BP	5e-06	1.71028e-05	30	137	7
GO:1901293	nucleoside phosphate biosynthetic process	c110032_g1,c110032_g2,c140023_g1,c146942_g1,c151047_g2,c153259_g1,c154301_g2,c158643_g1,c160544_g1,c162291_g1,c173745_g1,c186154_g1,c197145_g1,c197168_g1,c199516_g1,c199759_g1,c199794_g1,c204298_g1,c206088_g1,c208395_g1,c210609_g1,c211285_g1,c212216_g1,c212216_g2,c21544_g1,c220308_g1,c223768_g3,c225822_g3,c230462_g1,c35949_g1	BP	5e-06	1.71028e-05	30	137	6
GO:0019359	nicotinamide nucleotide biosynthetic process	c110032_g1,c110032_g2,c140023_g1,c151047_g2,c154301_g2,c158643_g1,c197168_g1,c199516_g1,c199759_g1,c199794_g1,c206088_g1,c210609_g1,c211285_g1,c212216_g1,c212216_g2,c21544_g1,c220308_g1,c230462_g1,c35949_g1	BP	7.2e-06	2.39564e-05	19	68	8
GO:0006090	pyruvate metabolic process	c110032_g1,c110032_g2,c140023_g1,c151047_g2,c154301_g2,c158643_g1,c197168_g1,c199516_g1,c199759_g1,c199794_g1,c206088_g1,c210609_g1,c211285_g1,c212216_g1,c212216_g2,c21544_g1,c220308_g1,c230462_g1,c35949_g1	BP	9.1e-06	2.97375e-05	19	69	8
GO:0046364	monosaccharide biosynthetic process	c110032_g1,c110032_g2,c170920_g1,c184713_g1,c199794_g1,c206088_g1,c212216_g1,c212216_g2,c217361_g1,c217361_g2	BP	9.6e-06	3.08211e-05	10	22	5
GO:0006508	proteolysis	c100976_g1,c108871_g1,c144266_g1,c156247_g1,c169578_g1,c176154_g3,c177087_g1,c184669_g1,c184727_g1,c186467_g1,c190594_g1,c192811_g1,c195598_g1,c199102_g1,c199822_g1,c199822_g2,c200094_g1,c203335_g1,c205298_g1,c205586_g1,c205616_g1,c206019_g1,c208872_g2,c209104_g1,c209927_g1,c210559_g1,c212013_g1,c213131_g1,c21401_g1,c21401_g2,c214052_g1,c214254_g1,c217066_g4,c217242_g1,c218693_g1,c219673_g6,c2197…	BP	1e-05	3.15517e-05	60	374	5
GO:0046496	nicotinamide nucleotide metabolic process	c110032_g1,c110032_g2,c140023_g1,c151047_g2,c154301_g2,c158643_g1,c197168_g1,c199516_g1,c199759_g1,c199794_g1,c206088_g1,c210398_g1,c210609_g1,c211285_g1,c212216_g1,c212216_g2,c21544_g1,c220308_g1,c230462_g1,c35949_g1,c58352_g1	BP	1.1e-05	3.38319e-05	21	82	7
GO:0019363	pyridine nucleotide biosynthetic process	c110032_g1,c110032_g2,c140023_g1,c151047_g2,c154301_g2,c158643_g1,c197168_g1,c199516_g1,c199759_g1,c199794_g1,c206088_g1,c210609_g1,c211285_g1,c212216_g1,c212216_g2,c21544_g1,c220308_g1,c230462_g1,c35949_g1	BP	1.1e-05	3.38319e-05	19	70	7
GO:0072525	pyridine-containing compound biosynthetic process	c110032_g1,c110032_g2,c140023_g1,c151047_g2,c154301_g2,c158643_g1,c197168_g1,c199516_g1,c199759_g1,c199794_g1,c206088_g1,c210609_g1,c211285_g1,c212216_g1,c212216_g2,c21544_g1,c220308_g1,c230462_g1,c302597_g1,c35949_g1	BP	1.4e-05	4.2e-05	20	77	6
GO:0009108	coenzyme biosynthetic process	c110032_g1,c110032_g2,c140023_g1,c151047_g2,c154301_g2,c158643_g1,c170920_g1,c186154_g1,c197168_g1,c199516_g1,c199759_g1,c199794_g1,c205182_g1,c206088_g1,c210609_g1,c211285_g1,c212216_g1,c212216_g2,c214371_g7,c21544_g1,c217361_g1,c217361_g2,c220308_g1,c230462_g1,c231108_g4,c28036_g1,c302597_g1,c35949_g1,c90003_g1	BP	1.5e-05	4.392e-05	29	137	6
GO:0034655	nucleobase-containing compound catabolic process	c110032_g1,c110032_g2,c140023_g1,c151047_g2,c154301_g2,c158643_g1,c176832_g1,c195113_g1,c197168_g1,c199516_g1,c199759_g1,c199794_g1,c206088_g1,c210609_g1,c211285_g1,c212216_g1,c212216_g2,c21544_g1,c220308_g1,c230462_g1,c302627_g1,c35949_g1	BP	1.5e-05	4.392e-05	22	90	5
GO:0019362	pyridine nucleotide metabolic process	c110032_g1,c110032_g2,c140023_g1,c151047_g2,c154301_g2,c158643_g1,c197168_g1,c199516_g1,c199759_g1,c199794_g1,c206088_g1,c210398_g1,c210609_g1,c211285_g1,c212216_g1,c212216_g2,c21544_g1,c220308_g1,c230462_g1,c35949_g1,c58352_g1	BP	1.6e-05	4.575e-05	21	84	6
GO:0006733	oxidoreduction coenzyme metabolic process	c110032_g1,c110032_g2,c140023_g1,c151047_g2,c154301_g2,c158643_g1,c197168_g1,c199516_g1,c199759_g1,c199794_g1,c206088_g1,c210398_g1,c210609_g1,c211285_g1,c212216_g1,c212216_g2,c21544_g1,c220308_g1,c230462_g1,c28036_g1,c35949_g1,c58352_g1	BP	1.8e-05	5.02901e-05	22	91	6
GO:0072524	pyridine-containing compound metabolic process	c110032_g1,c110032_g2,c140023_g1,c151047_g2,c154301_g2,c158643_g1,c197168_g1,c199516_g1,c199759_g1,c199794_g1,c206088_g1,c210398_g1,c210609_g1,c211285_g1,c212216_g1,c212216_g2,c21544_g1,c220308_g1,c230462_g1,c302597_g1,c35949_g1,c58352_g1	BP	1.8e-05	5.02901e-05	22	91	5
GO:0051186	cofactor metabolic process	c110032_g1,c110032_g2,c140023_g1,c148995_g2,c151047_g2,c154301_g2,c158643_g1,c170920_g1,c177014_g1,c186154_g1,c187223_g1,c197102_g1,c197168_g1,c199516_g1,c199759_g1,c199794_g1,c205001_g1,c205182_g1,c206088_g1,c206193_g1,c210398_g1,c210609_g1,c211109_g1,c211285_g1,c212216_g1,c212216_g2,c214371_g7,c21544_g1,c217361_g1,c217361_g2,c220308_g1,c222769_g1,c222769_g2,c222871_g8,c228671_g1,c229947_g1,c230…	BP	1.9e-05	5.18955e-05	47	275	4
GO:0055114	oxidation-reduction process	c108880_g1,c126221_g1,c130388_g1,c130963_g1,c138498_g1,c144571_g1,c148313_g1,c148995_g2,c154738_g1,c161071_g1,c162704_g1,c170920_g1,c177014_g1,c178604_g1,c180600_g1,c181035_g1,c181371_g1,c183815_g1,c183933_g1,c185968_g1,c186651_g1,c190156_g1,c190481_g1,c190511_g1,c190600_g1,c190716_g1,c196432_g1,c196881_g1,c197329_g1,c197593_g2,c199036_g1,c199516_g1,c200912_g1,c201286_g1,c204099_g1,c204191_g1,c20…	BP	2e-05	5.38235e-05	111	834	3
GO:0043436	oxoacid metabolic process	c110032_g1,c110032_g2,c130388_g1,c137532_g2,c140023_g1,c144184_g1,c148313_g1,c151047_g2,c153259_g1,c154301_g2,c154738_g1,c158643_g1,c170920_g1,c177014_g1,c178792_g1,c183933_g1,c185526_g1,c185968_g1,c190716_g1,c196877_g1,c197102_g1,c197168_g1,c197329_g1,c199516_g1,c199759_g1,c199794_g1,c205001_g1,c205703_g1,c206088_g1,c207198_g1,c207568_g1,c208697_g1,c210032_g1,c210299_g3,c210559_g1,c210609_g1,c21…	BP	2.5e-05	6.63043e-05	77	531	5
GO:0006082	organic acid metabolic process	c110032_g1,c110032_g2,c130388_g1,c137532_g2,c140023_g1,c144184_g1,c148313_g1,c151047_g2,c153259_g1,c154301_g2,c154738_g1,c158643_g1,c170920_g1,c177014_g1,c178792_g1,c183933_g1,c185526_g1,c185968_g1,c190716_g1,c196877_g1,c197102_g1,c197168_g1,c197329_g1,c199516_g1,c199759_g1,c199794_g1,c205001_g1,c205703_g1,c206088_g1,c207198_g1,c207568_g1,c208697_g1,c210032_g1,c210299_g3,c210559_g1,c210609_g1,c21…	BP	3.1e-05	8.10429e-05	77	534	4
GO:1901137	carbohydrate derivative biosynthetic process	c110032_g1,c110032_g2,c131861_g1,c140023_g1,c146942_g1,c151047_g2,c153259_g1,c154301_g2,c158643_g1,c160544_g1,c162291_g1,c173745_g1,c197145_g1,c197168_g1,c199516_g1,c199759_g1,c199794_g1,c200306_g1,c200690_g1,c204298_g1,c205703_g1,c206088_g1,c208395_g1,c210609_g1,c211285_g1,c21133_g1,c212216_g1,c212216_g2,c213620_g1,c21544_g1,c217836_g1,c220308_g1,c223768_g3,c224117_g2,c224117_g8,c225822_g3,c2264…	BP	3.9e-05	0.000100521	40	227	5
GO:1901657	glycosyl compound metabolic process	c153259_g1,c162291_g1,c173745_g1,c197145_g1,c200306_g1,c208395_g1,c224117_g2,c224117_g8,c225822_g3,c229271_g9	BP	5.6e-05	0.000141352	10	26	5
GO:1901659	glycosyl compound biosynthetic process	c153259_g1,c162291_g1,c173745_g1,c197145_g1,c200306_g1,c208395_g1,c224117_g2,c224117_g8,c225822_g3,c229271_g9	BP	5.6e-05	0.000141352	10	26	6
GO:0016052	carbohydrate catabolic process	c110032_g1,c110032_g2,c130963_g1,c140023_g1,c151047_g2,c154301_g2,c158643_g1,c160967_g1,c193411_g2,c197168_g1,c199516_g1,c199759_g1,c199794_g1,c199857_g1,c205205_g1,c206088_g1,c210282_g2,c210609_g1,c211285_g1,c212216_g1,c212216_g2,c215382_g1,c215382_g2,c21544_g1,c220308_g1,c230462_g1,c35949_g1,c6140_g1	BP	8.9e-05	0.000220095	28	143	5
GO:0019752	carboxylic acid metabolic process	c110032_g1,c110032_g2,c130388_g1,c137532_g2,c140023_g1,c144184_g1,c148313_g1,c151047_g2,c153259_g1,c154301_g2,c154738_g1,c158643_g1,c170920_g1,c177014_g1,c178792_g1,c183933_g1,c185526_g1,c185968_g1,c190716_g1,c196877_g1,c197102_g1,c197168_g1,c197329_g1,c199516_g1,c199759_g1,c199794_g1,c205001_g1,c205703_g1,c206088_g1,c207198_g1,c208697_g1,c210032_g1,c210299_g3,c210559_g1,c210609_g1,c210849_g1,c21…	BP	0.0001	0.000244	72	508	6
GO:0006094	gluconeogenesis	c110032_g1,c110032_g2,c184713_g1,c199794_g1,c206088_g1,c212216_g1,c212216_g2	BP	0.00011	0.000263137	7	14	7
GO:0019319	hexose biosynthetic process	c110032_g1,c110032_g2,c184713_g1,c199794_g1,c206088_g1,c212216_g1,c212216_g2	BP	0.00011	0.000263137	7	14	6
GO:1901135	carbohydrate derivative metabolic process	c110032_g1,c110032_g2,c131861_g1,c140023_g1,c146942_g1,c151047_g2,c153259_g1,c154301_g2,c158643_g1,c160544_g1,c162291_g1,c173745_g1,c197145_g1,c197168_g1,c199516_g1,c199759_g1,c199794_g1,c200306_g1,c200690_g1,c204298_g1,c205703_g1,c206088_g1,c208395_g1,c210398_g1,c210609_g1,c211285_g1,c21133_g1,c212216_g1,c212216_g2,c213620_g1,c21544_g1,c217836_g1,c220308_g1,c223768_g3,c224117_g2,c224117_g8,c2258…	BP	0.00014	0.000328462	43	264	4
GO:0044270	cellular nitrogen compound catabolic process	c110032_g1,c110032_g2,c140023_g1,c151047_g2,c154301_g2,c158643_g1,c176832_g1,c195113_g1,c197168_g1,c199516_g1,c199759_g1,c199794_g1,c206088_g1,c210609_g1,c211285_g1,c212216_g1,c212216_g2,c21544_g1,c220308_g1,c230462_g1,c302627_g1,c35949_g1	BP	0.00018	0.000416962	22	105	5
GO:0051188	cofactor biosynthetic process	c110032_g1,c110032_g2,c140023_g1,c151047_g2,c154301_g2,c158643_g1,c170920_g1,c186154_g1,c187223_g1,c197168_g1,c199516_g1,c199759_g1,c199794_g1,c205182_g1,c206088_g1,c206193_g1,c210609_g1,c211285_g1,c212216_g1,c212216_g2,c214371_g7,c21544_g1,c217361_g1,c217361_g2,c220308_g1,c230462_g1,c231108_g4,c250059_g1,c28036_g1,c302597_g1,c35949_g1,c90003_g1	BP	0.0002	0.0004575	32	180	5
GO:0006006	glucose metabolic process	c110032_g1,c110032_g2,c184713_g1,c199794_g1,c2005_g1,c206088_g1,c212216_g1,c212216_g2	BP	0.00023	0.00051963	8	20	6
GO:0019439	aromatic compound catabolic process	c110032_g1,c110032_g2,c140023_g1,c151047_g2,c154301_g2,c158643_g1,c176832_g1,c195113_g1,c197168_g1,c199516_g1,c199759_g1,c199794_g1,c206088_g1,c210609_g1,c211285_g1,c212216_g1,c212216_g2,c21544_g1,c220308_g1,c230462_g1,c302627_g1,c35949_g1	BP	0.00024	0.000532364	22	107	5
GO:0046700	heterocycle catabolic process	c110032_g1,c110032_g2,c140023_g1,c151047_g2,c154301_g2,c158643_g1,c176832_g1,c195113_g1,c197168_g1,c199516_g1,c199759_g1,c199794_g1,c206088_g1,c210609_g1,c211285_g1,c212216_g1,c212216_g2,c21544_g1,c220308_g1,c230462_g1,c302627_g1,c35949_g1	BP	0.00024	0.000532364	22	107	5
GO:0042278	purine nucleoside metabolic process	c162291_g1,c173745_g1,c208395_g1,c224117_g2,c224117_g8	BP	0.00029	0.000620702	5	8	6
GO:0042451	purine nucleoside biosynthetic process	c162291_g1,c173745_g1,c208395_g1,c224117_g2,c224117_g8	BP	0.00029	0.000620702	5	8	7
GO:0046128	purine ribonucleoside metabolic process	c162291_g1,c173745_g1,c208395_g1,c224117_g2,c224117_g8	BP	0.00029	0.000620702	5	8	7
GO:0046129	purine ribonucleoside biosynthetic process	c162291_g1,c173745_g1,c208395_g1,c224117_g2,c224117_g8	BP	0.00029	0.000620702	5	8	8
GO:0044283	small molecule biosynthetic process	c110032_g1,c110032_g2,c130388_g1,c137532_g2,c140023_g1,c144184_g1,c151047_g2,c153259_g1,c154301_g2,c156181_g1,c158643_g1,c162291_g1,c170920_g1,c173745_g1,c173863_g1,c178792_g1,c184713_g1,c185526_g1,c185968_g1,c197145_g1,c197168_g1,c199516_g1,c199759_g1,c199794_g1,c205182_g1,c205703_g1,c206088_g1,c207198_g1,c207742_g1,c208395_g1,c210032_g1,c210559_g1,c210609_g1,c210849_g1,c211285_g1,c211330_g2,c21…	BP	0.00034	0.000707045	61	430	4
GO:0019637	organophosphate metabolic process	c110032_g1,c110032_g2,c140023_g1,c146942_g1,c151047_g2,c153259_g1,c154301_g2,c158643_g1,c160544_g1,c162291_g1,c173745_g1,c180629_g1,c186154_g1,c197145_g1,c197168_g1,c197267_g1,c199516_g1,c199759_g1,c199794_g1,c204298_g1,c205182_g1,c206088_g1,c208395_g1,c210398_g1,c210609_g1,c211285_g1,c212216_g1,c212216_g2,c21544_g1,c220072_g3,c220308_g1,c223768_g3,c223924_g2,c225822_g3,c227698_g1,c228671_g1,c229…	BP	0.00049	0.00100753	42	271	4
GO:0009116	nucleoside metabolic process	c153259_g1,c162291_g1,c173745_g1,c197145_g1,c208395_g1,c224117_g2,c224117_g8,c225822_g3	BP	0.0005	0.001	8	22	5
GO:0009119	ribonucleoside metabolic process	c153259_g1,c162291_g1,c173745_g1,c197145_g1,c208395_g1,c224117_g2,c224117_g8,c225822_g3	BP	0.0005	0.001	8	22	6
GO:0009163	nucleoside biosynthetic process	c153259_g1,c162291_g1,c173745_g1,c197145_g1,c208395_g1,c224117_g2,c224117_g8,c225822_g3	BP	0.0005	0.001	8	22	6
GO:0042455	ribonucleoside biosynthetic process	c153259_g1,c162291_g1,c173745_g1,c197145_g1,c208395_g1,c224117_g2,c224117_g8,c225822_g3	BP	0.0005	0.001	8	22	7
GO:1901361	organic cyclic compound catabolic process	c110032_g1,c110032_g2,c140023_g1,c151047_g2,c154301_g2,c158643_g1,c176832_g1,c195113_g1,c197168_g1,c199516_g1,c199759_g1,c199794_g1,c206088_g1,c210609_g1,c211285_g1,c212216_g1,c212216_g2,c21544_g1,c220308_g1,c230462_g1,c302627_g1,c35949_g1	BP	0.00061	0.00118755	22	114	5
GO:0072387	flavin adenine dinucleotide metabolic process	c186154_g1,c228671_g1,c229947_g1	BP	0.00078	0.00150253	3	3	6
GO:1901575	organic substance catabolic process	c110032_g1,c110032_g2,c130963_g1,c140023_g1,c151047_g2,c154301_g2,c154678_g1,c158643_g1,c160967_g1,c171188_g1,c176832_g1,c177014_g1,c193411_g2,c195113_g1,c197168_g1,c199516_g1,c199759_g1,c199794_g1,c199857_g1,c205205_g1,c206088_g1,c206854_g1,c210282_g2,c210299_g3,c210527_g1,c210609_g1,c211285_g1,c212216_g1,c212216_g2,c212407_g1,c213849_g1,c215382_g1,c215382_g2,c21544_g1,c217785_g1,c219304_g2,c220…	BP	0.00098	0.00186812	45	306	4
GO:0016051	carbohydrate biosynthetic process	c10609_g1,c110032_g1,c110032_g2,c131861_g1,c170920_g1,c173863_g1,c184713_g1,c199794_g1,c202700_g1,c206088_g1,c207011_g1,c207335_g1,c207742_g1,c208396_g1,c208396_g2,c212216_g1,c212216_g2,c214311_g2,c217361_g1,c217361_g2,c231015_g1,c231505_g1,c249877_g1,c73497_g1	BP	0.0012	0.00226392	24	135	5
GO:0044248	cellular catabolic process	c110032_g1,c110032_g2,c130963_g1,c140023_g1,c148995_g2,c151047_g2,c154301_g2,c158643_g1,c176832_g1,c177014_g1,c193411_g2,c195113_g1,c197168_g1,c199516_g1,c199759_g1,c199794_g1,c199857_g1,c205205_g1,c206088_g1,c210282_g2,c210299_g3,c210609_g1,c211285_g1,c212216_g1,c212216_g2,c213849_g1,c215382_g1,c215382_g2,c21544_g1,c219304_g2,c220308_g1,c221650_g3,c221650_g4,c222285_g5,c222871_g8,c230462_g1,c267…	BP	0.00181	0.0033799	42	289	4
GO:0008216	spermidine metabolic process	c220427_g2,c224117_g2,c224117_g8,c285144_g1	BP	0.002	0.00367839	4	7	5
GO:0008295	spermidine biosynthetic process	c220427_g2,c224117_g2,c224117_g8,c285144_g1	BP	0.002	0.00367839	4	7	6
GO:0090407	organophosphate biosynthetic process	c110032_g1,c110032_g2,c140023_g1,c146942_g1,c151047_g2,c153259_g1,c154301_g2,c158643_g1,c160544_g1,c162291_g1,c173745_g1,c180629_g1,c186154_g1,c197145_g1,c197168_g1,c199516_g1,c199759_g1,c199794_g1,c204298_g1,c205182_g1,c206088_g1,c208395_g1,c210609_g1,c211285_g1,c212216_g1,c212216_g2,c21544_g1,c220308_g1,c223768_g3,c223924_g2,c225822_g3,c230462_g1,c302597_g1,c35949_g1,c48385_g1	BP	0.00263	0.00476525	35	234	5
[truncated: 215 more rows]

## Sheet: Up
GO_accession	Description	GeneNames	Ontology	pValue	qValue	fg	bg	GO_level
[truncated: 316 more rows]
